# Supplementary material for: The miR-183/96/182 cluster regulates sensory innervation, resident myeloid cells and functions of the cornea through cell type-specific target genes
Source: PubMed Central journal article supplement (PMC10985120; doi:10.1038/s41598-024-58403-1), 2024-04-01
Supplement: 41598_2024_58403_MOESM1_ESM.pdf [file 41598_2024_58403_MOESM1_ESM.pdf]

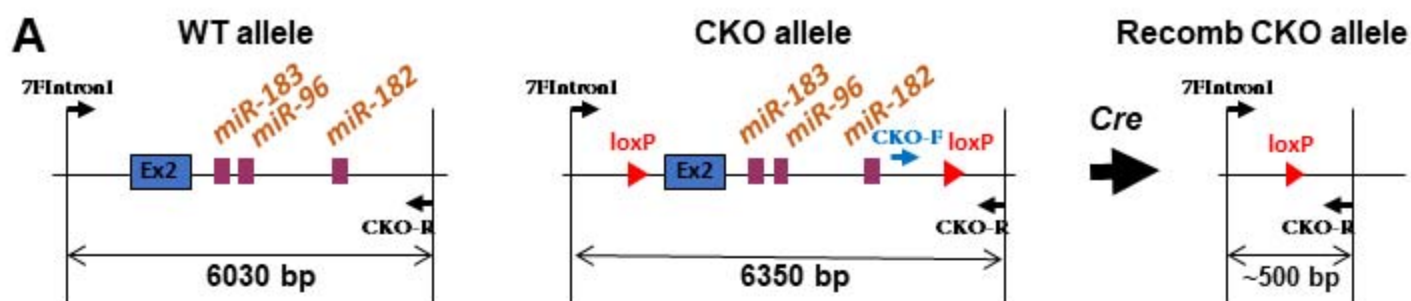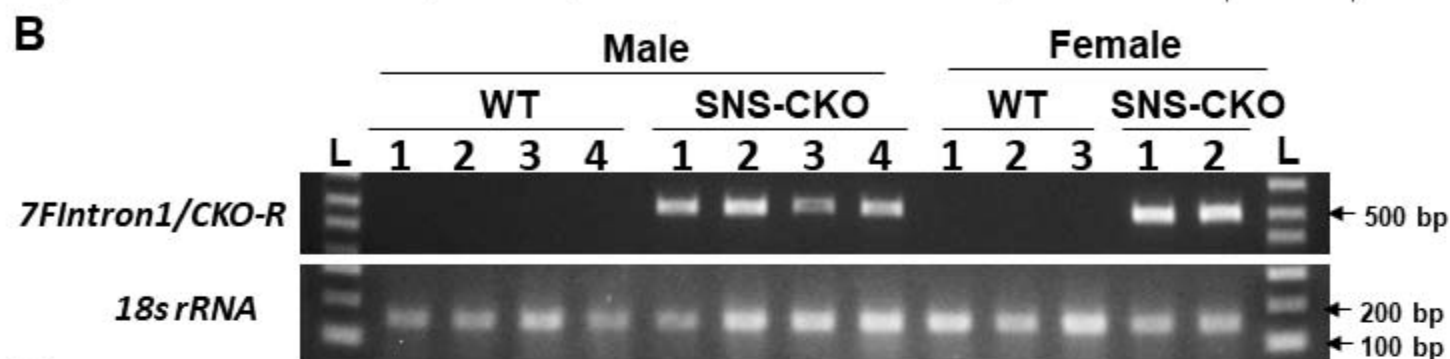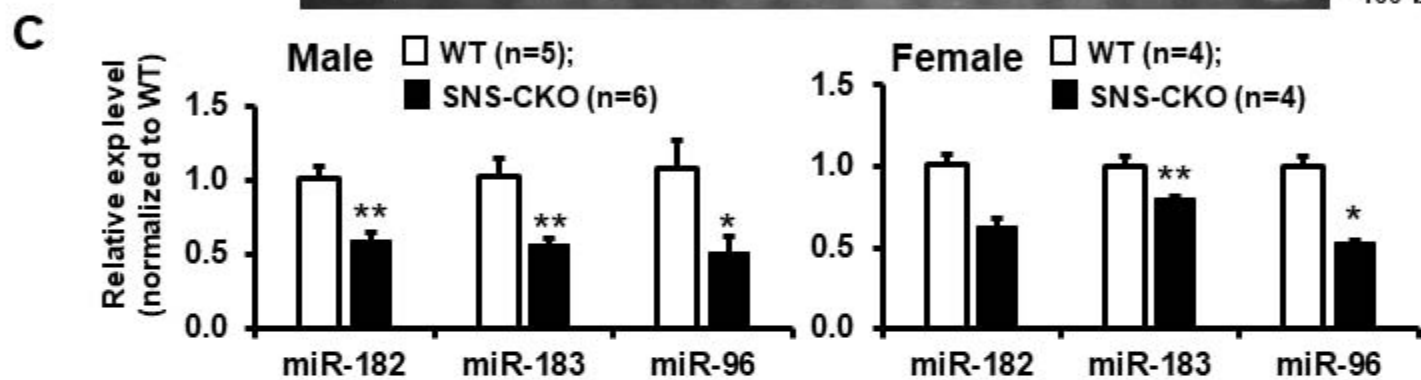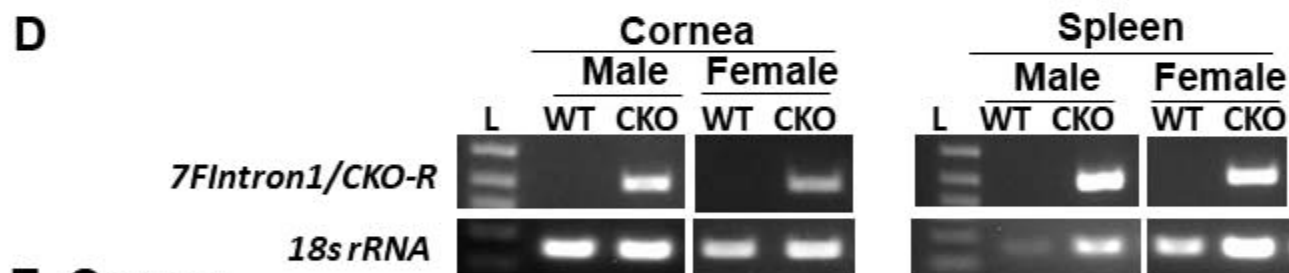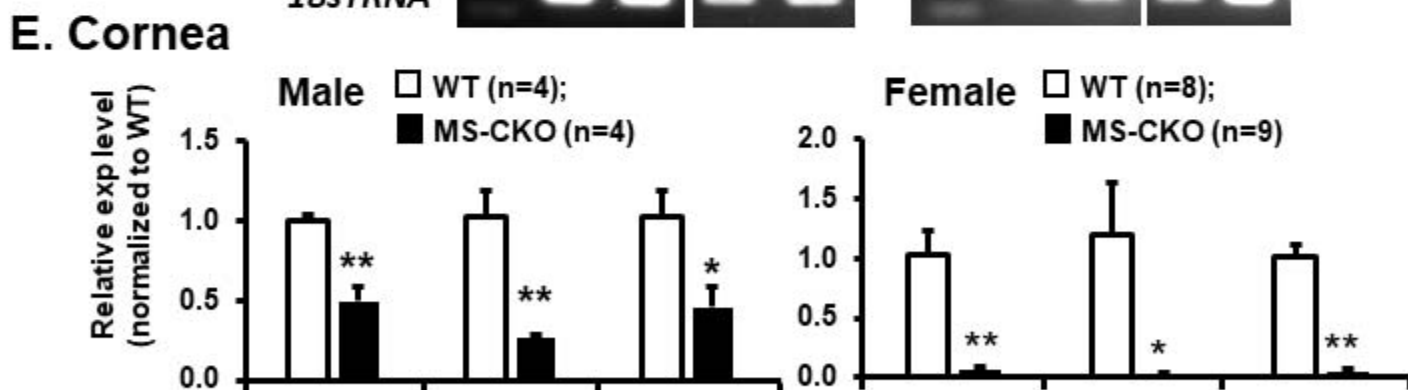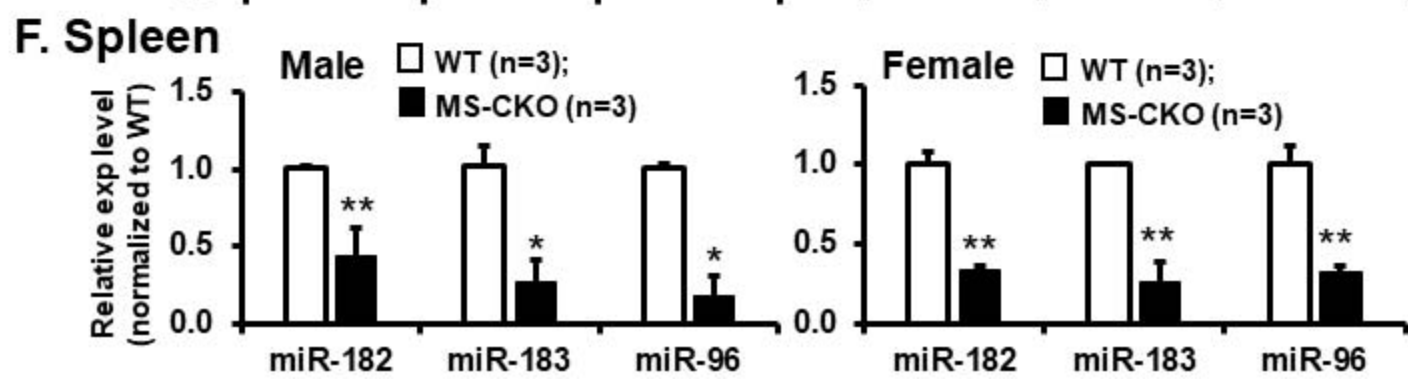

**Figure S1. miR-183C is inactivated in the TG of SNS-CKO and in Csf1r-EGFP+ myeloid cells of MS-CKO mice.** A. Illustration of the miR-183C WT allele, floxed CKO allele before and after Cre-induced recombination. 7FIntron1 and CKO-R are primers to detect the recombination event. CKO-F and CKO-R are primers used in routine genotyping PCR. The sizes of the amplicons are labeled under the double arrows. B, D. Genotyping PCR using genomic DNAs of TG of SNS-CKO (B) or Csf1r-EGFP+ myeloid cells of the cornea and spleen of MS-CKO and their age- and sex-matched WT control mice (D). Only the SNS-CKO or MS-CKO samples, but not the WT controls, are positive to recombinant allele. The amplicon of the WT allele is too big to be amplified under this condition. C, E, F. qRT-PCR of miR-183C in TG of SNS-CKO (C) or Csf1r-EGFP+ myeloid cells of the cornea and spleen of MS-CKO and their age- and sex-matched WT control mice (E,F). \*:  $p < 0.05$ ; \*\*:  $p < 0.01$ .

# Appendix 1 of Fig.S1

Original gel images for Panel B

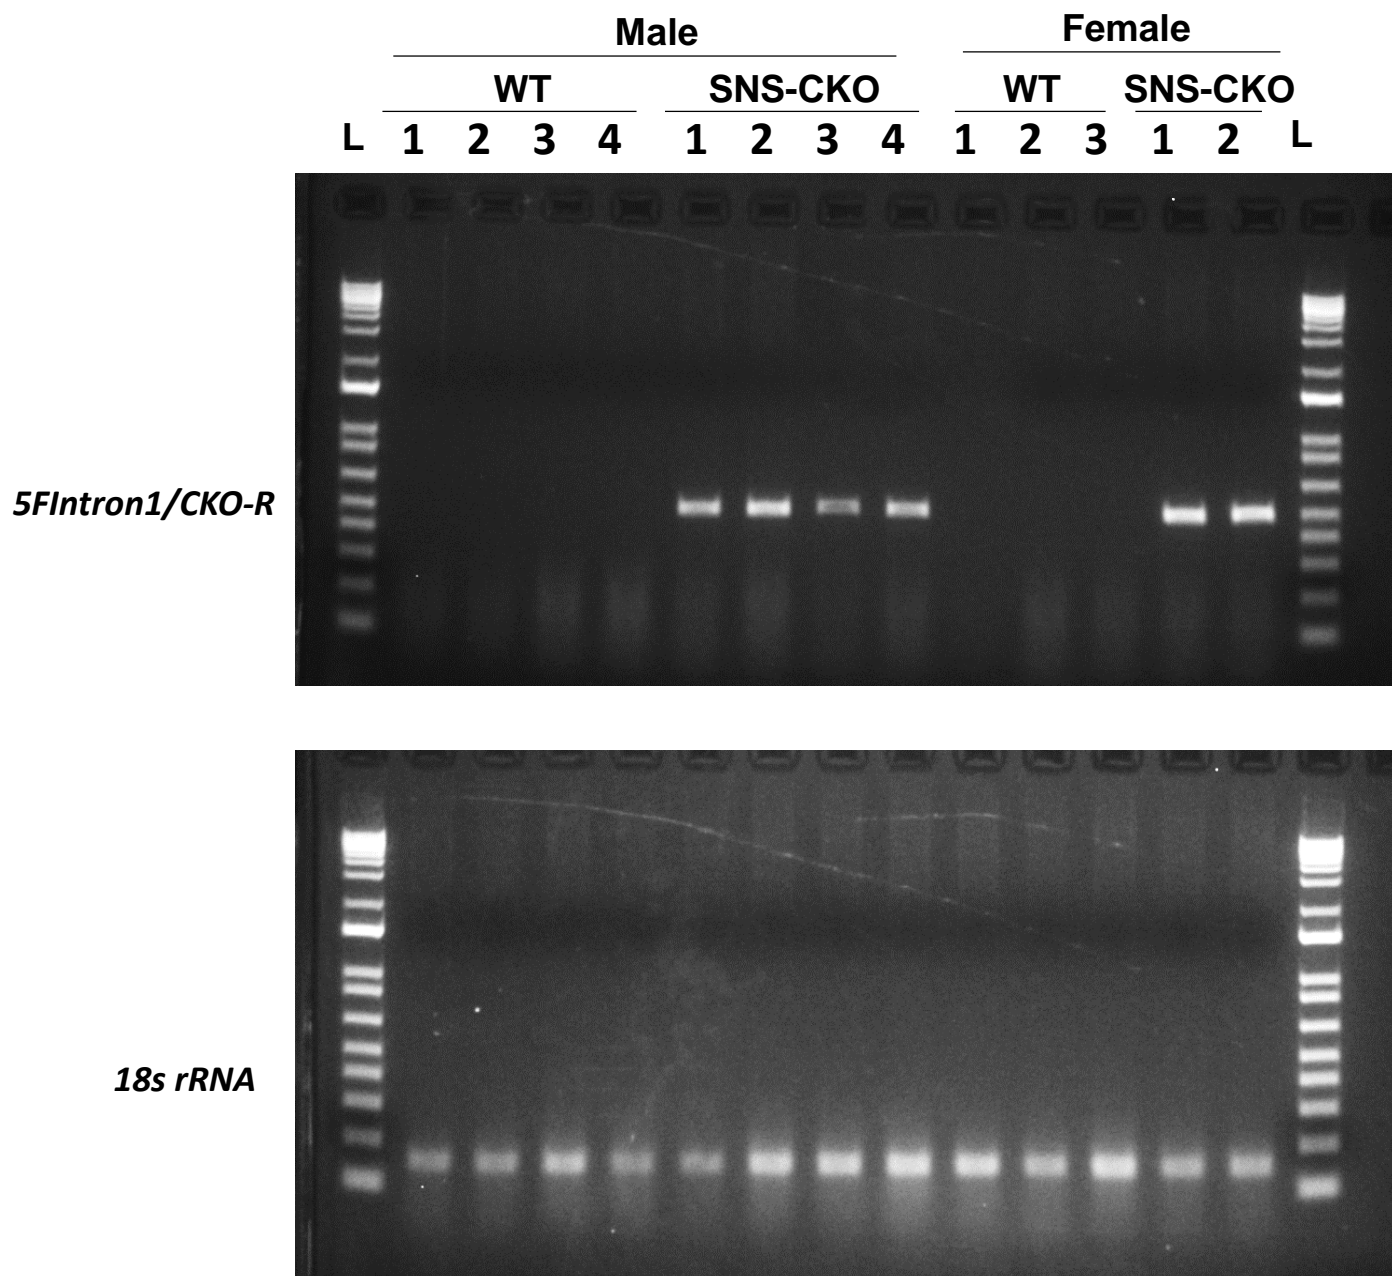

## Appendix 2 of Fig.S1

### Original gel images for Panel D

This challenging project involves FACS cell sorting of rare myeloid cells in the cornea and spleen followed by DNA prep and PCR. Multiple experiments were performed to obtain data in two different tissues in both male and female, CKO and WT mice.

Panel D male cornea  
5Fintron1/CKO-R amplicon

**Cornea**

**Male**

L WT CKO

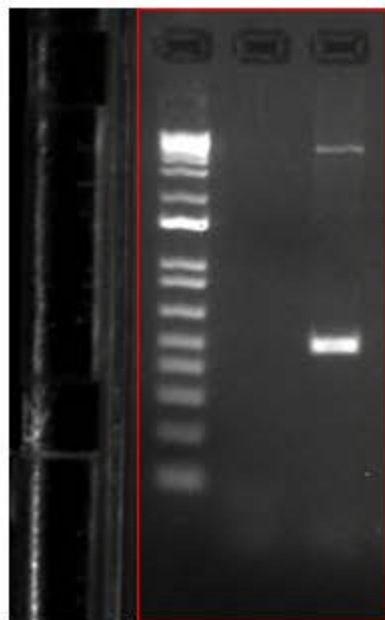

For Panel D female cornea  
5Fintron1/CKO-R amplicon

**Cornea**

**Female**

L WT CKO

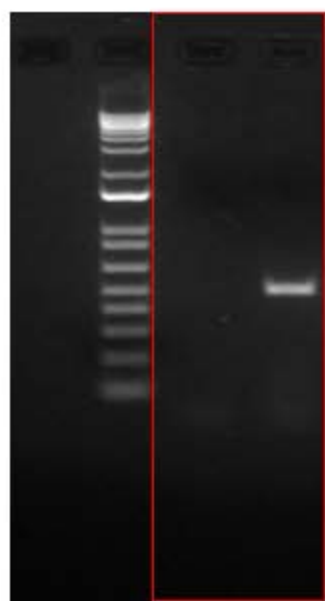

18s RNA amplicon

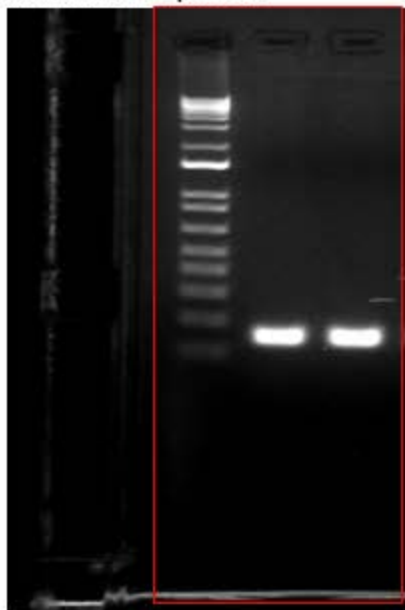

18s RNA amplicon

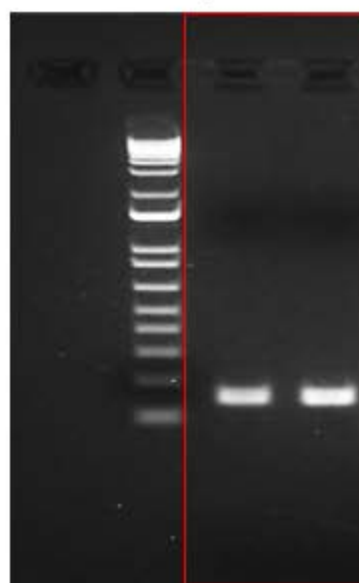

The red squares delineate the lanes displayed in Fig.S1

## Appendix 3 of Fig.S1

### Original gel images for Panel D

For Panel D male spleen  
5Fintron1/CKO-R amplicon

For Panel D female spleen

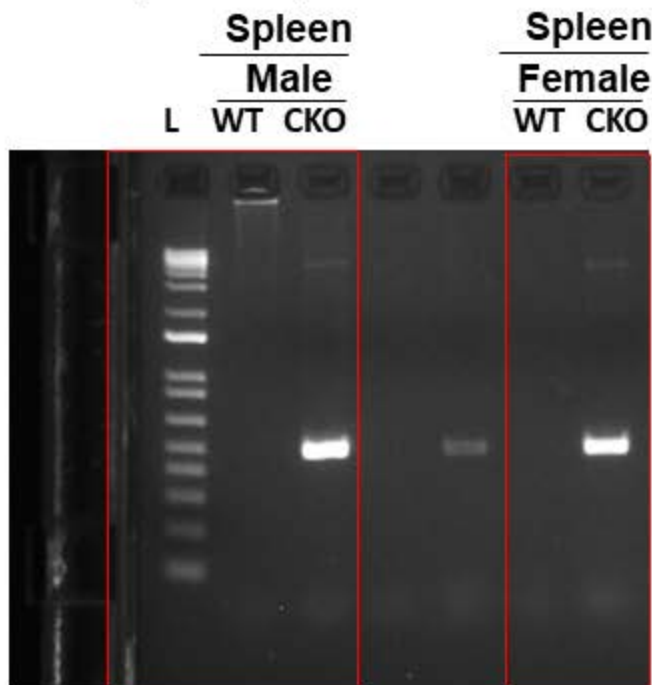

18s rRNA amplicon

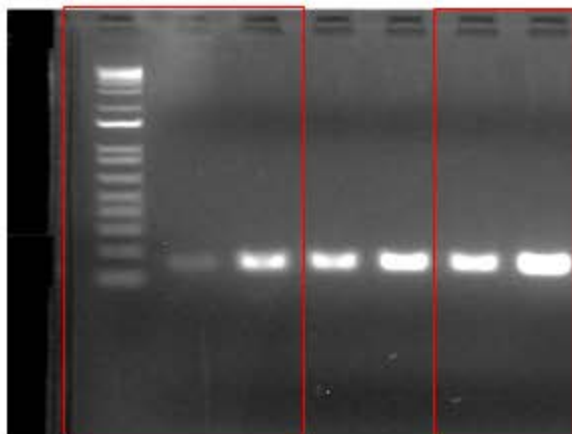

The red squares delineate the lanes displayed in Fig.S1



## A. Whorl center region

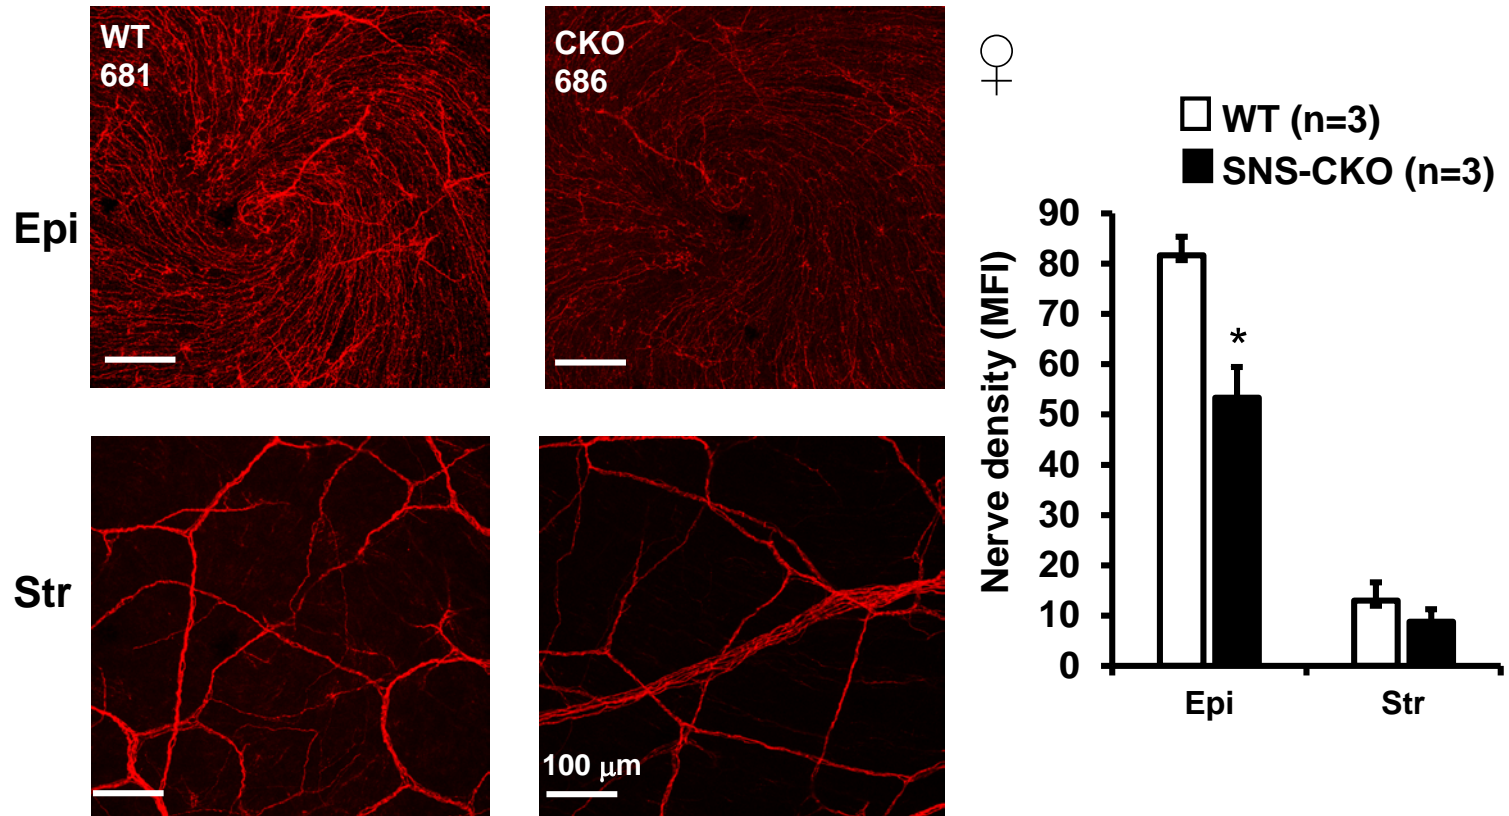

## B. Peripheral cornea

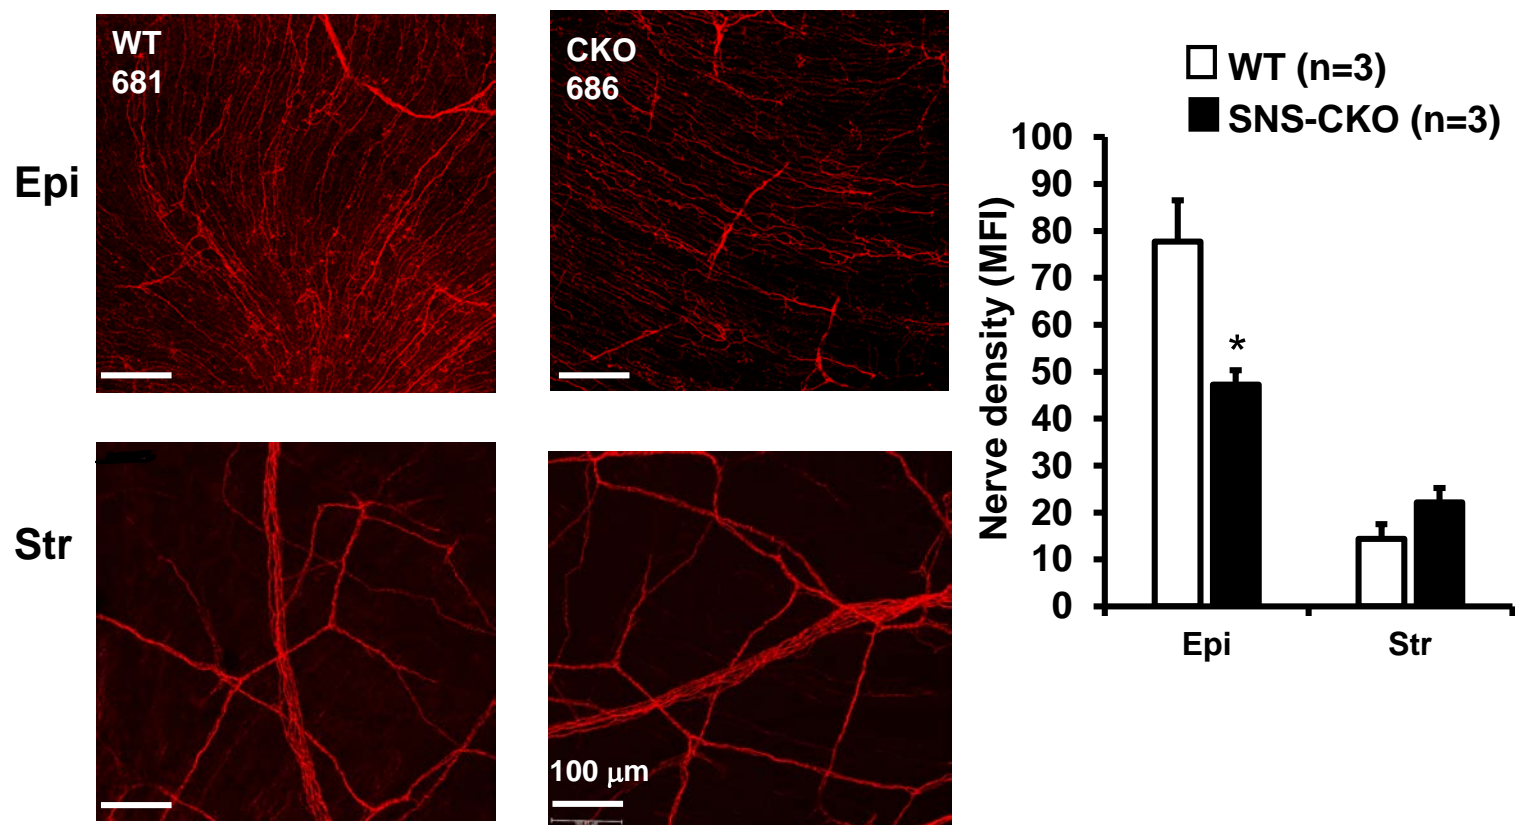

**Figure S2. Sensory nerve density in the epithelial layer is decreased in female SNS-CKO vs age-matched WT control mice. Epi: epithelial; Str: stromal. \*:  $p < 0.05$ . MFI: mean fluorescence intensity.**

## A. Cornea

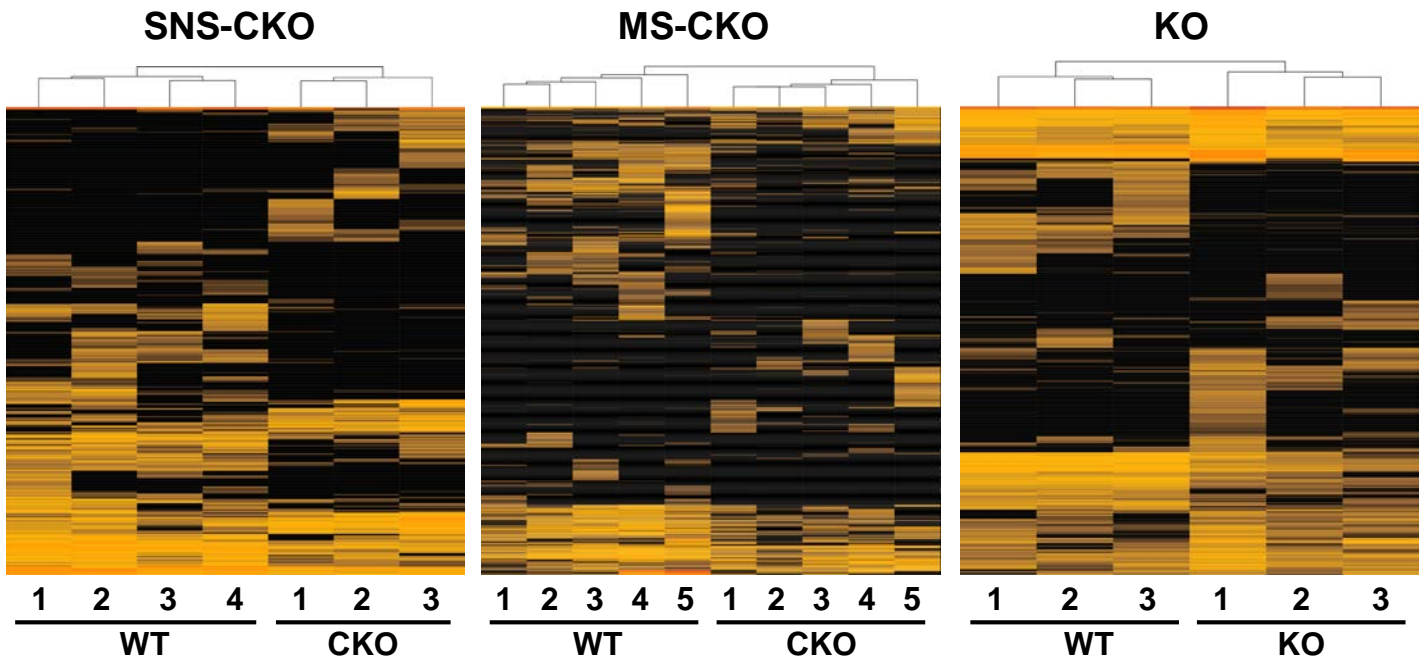

## B. TG

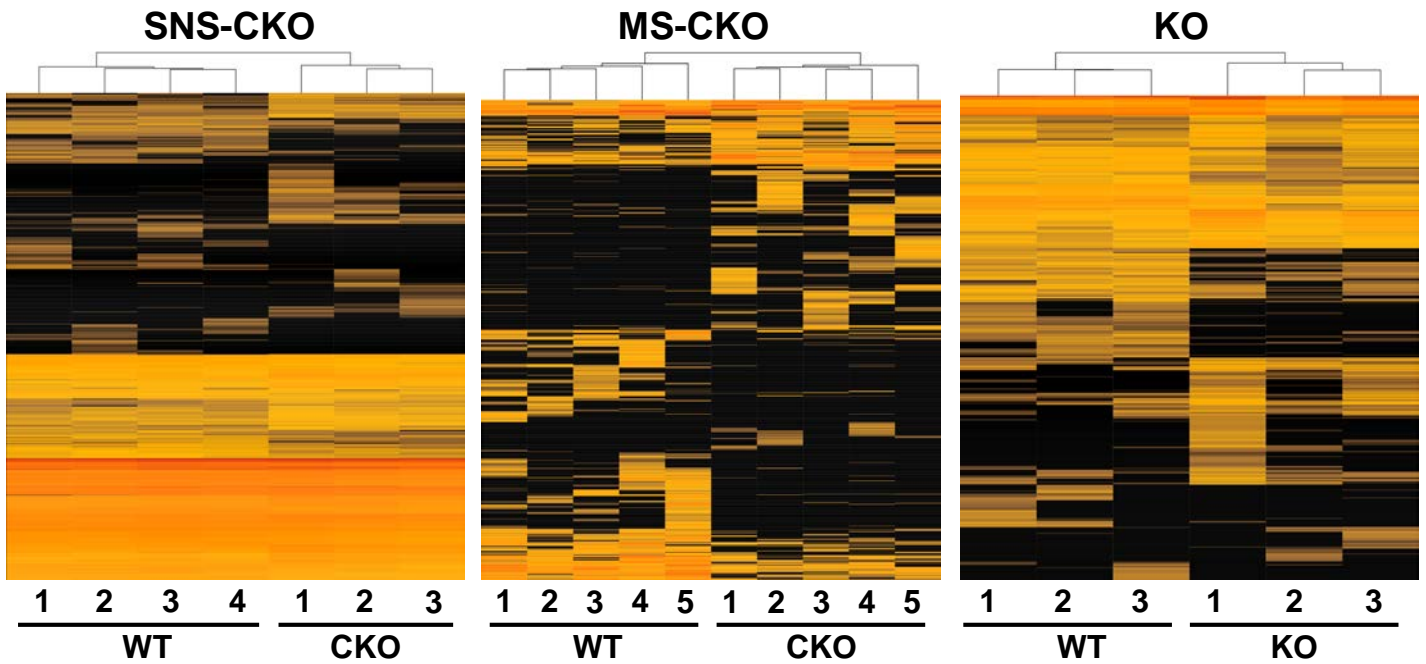

**Figure S3. Heatmap of differentially expressed genes in the cornea (A) and TG (B) of miR-183C SNS-CKO, MS-CKO and KO vs their age- and sex-matched WT control mice.**

**A**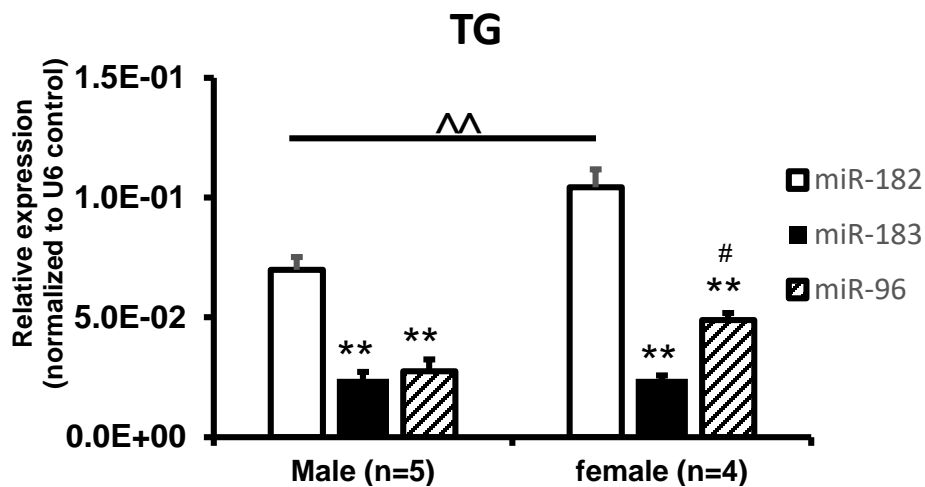**B**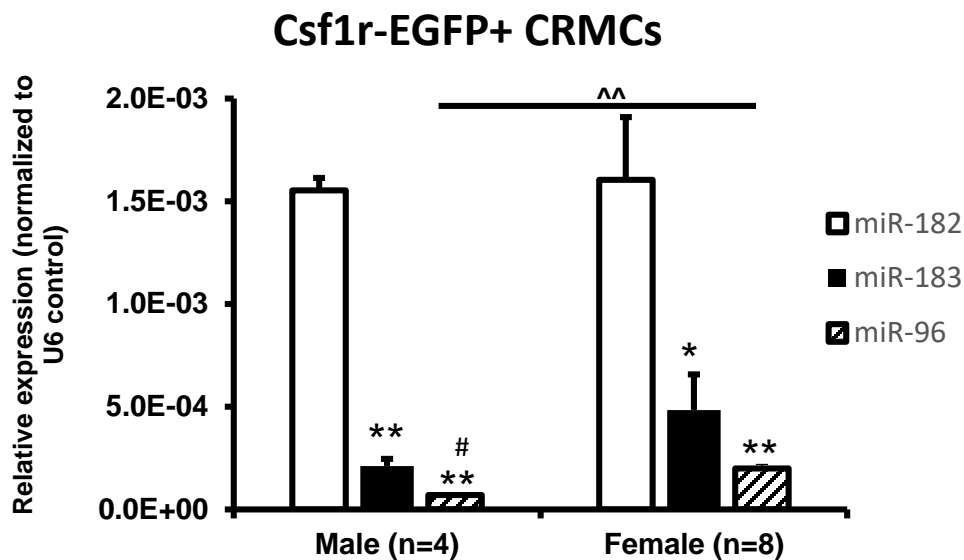**C**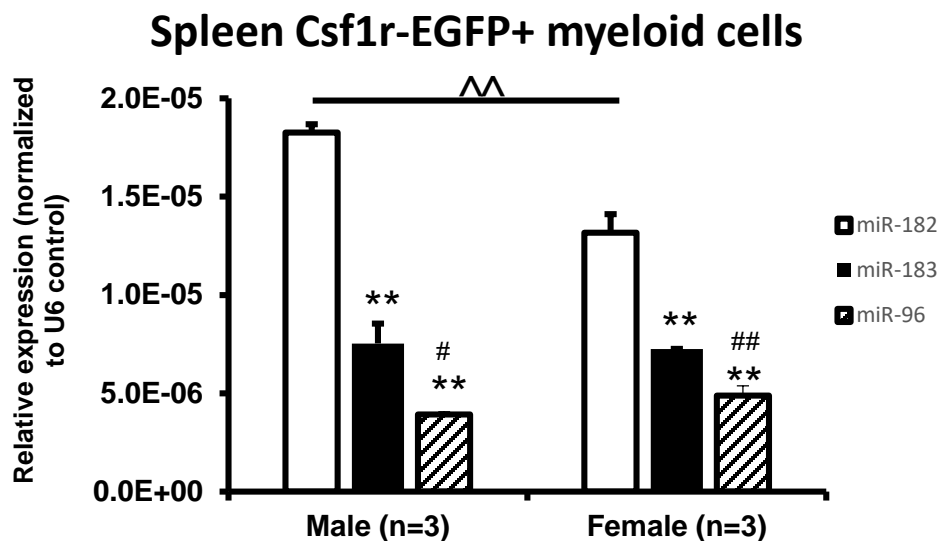

**Figure S4. qRT-PCR of miR-183C in the TG (A) and Csf1r-EGFP+ myeloid cells of the cornea (B) and spleen (C) of naïve WT controls mice. \*\*: p<0.01 (compared to miR-182); #: p<0.05; ##: p<0.01 (compared to miR-183); ^^: p<0.01 male vs female.**



**A. In the cornea of miR-183C KO vs WT control mice**

○ WT  
△ KO

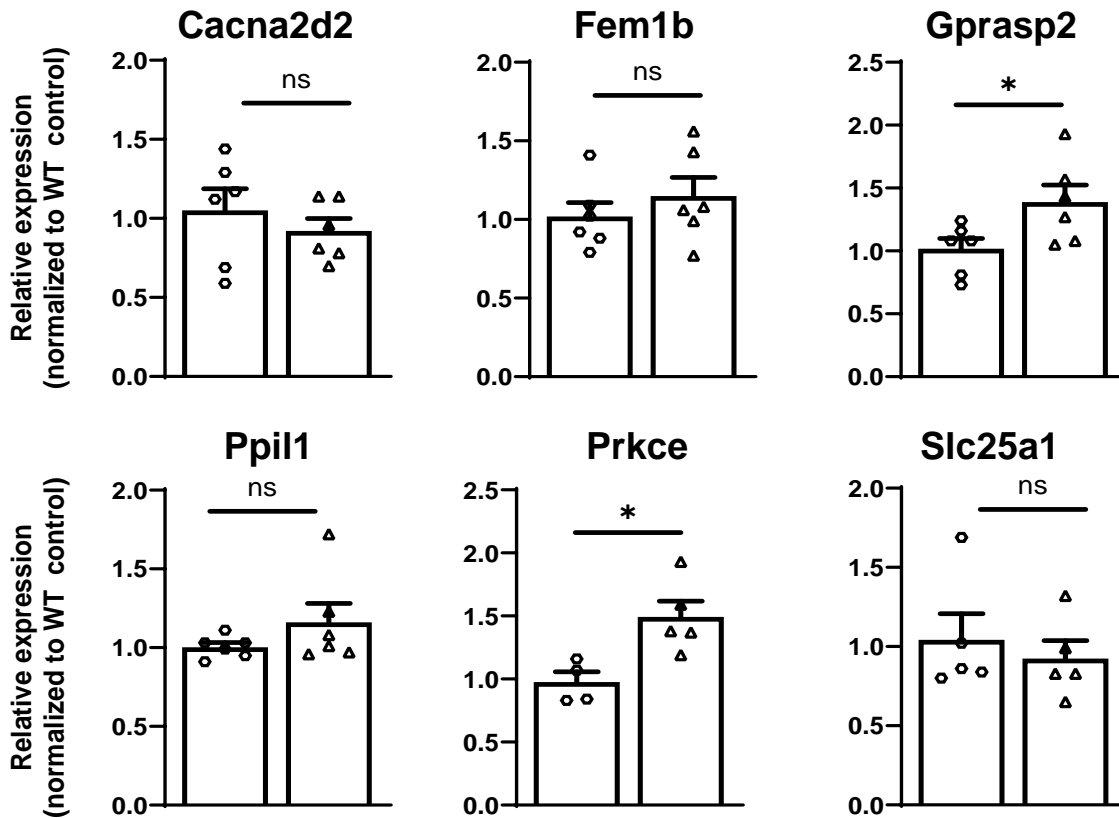

**B. In the TG of miR-183C SNS-CKO vs WT control mice**

○ WT  
△ SNS-CKO

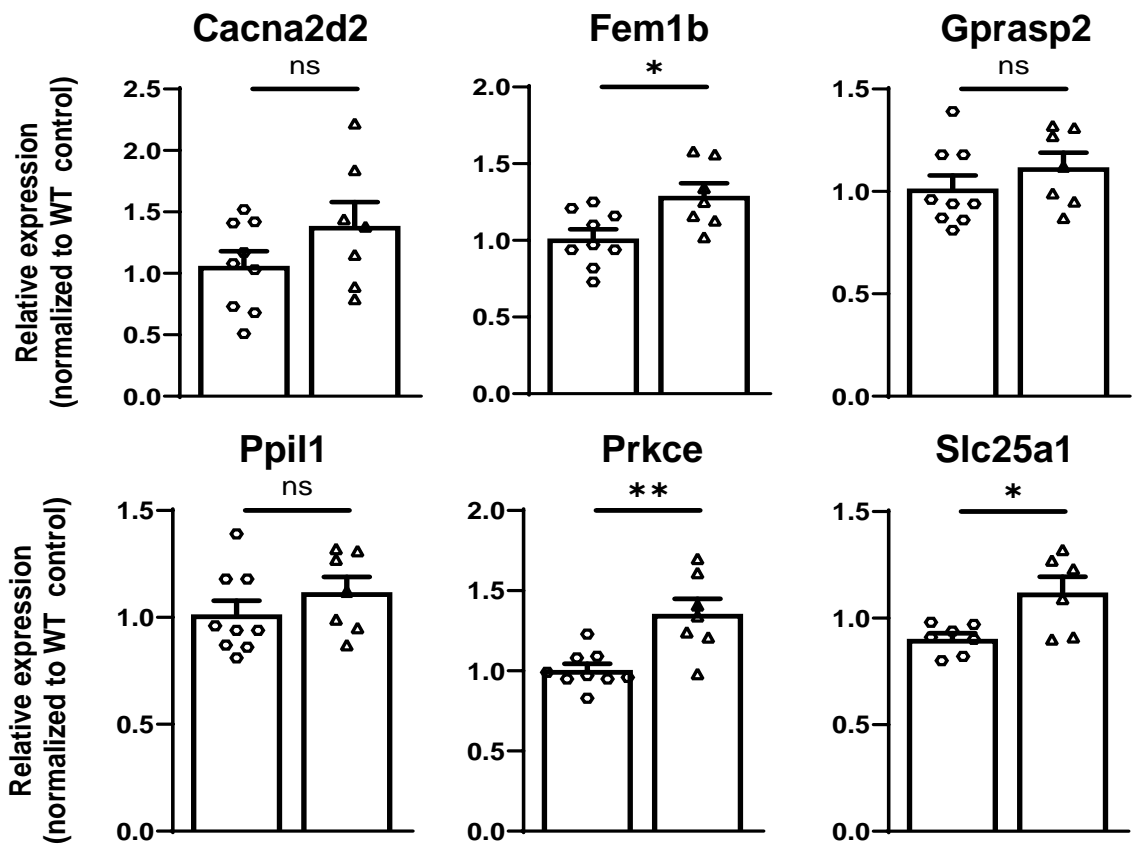

**Figure S5. Validation study by qRT-PCR of six miR-183C target genes in the cornea of miR-183C KO mice (A) and in the TG of SNS-CKO vs corresponding age- and sex-matched WT controls (B). 8-12 weeks old male mice were used. \*: p<0.05; \*\*: p<0.01**

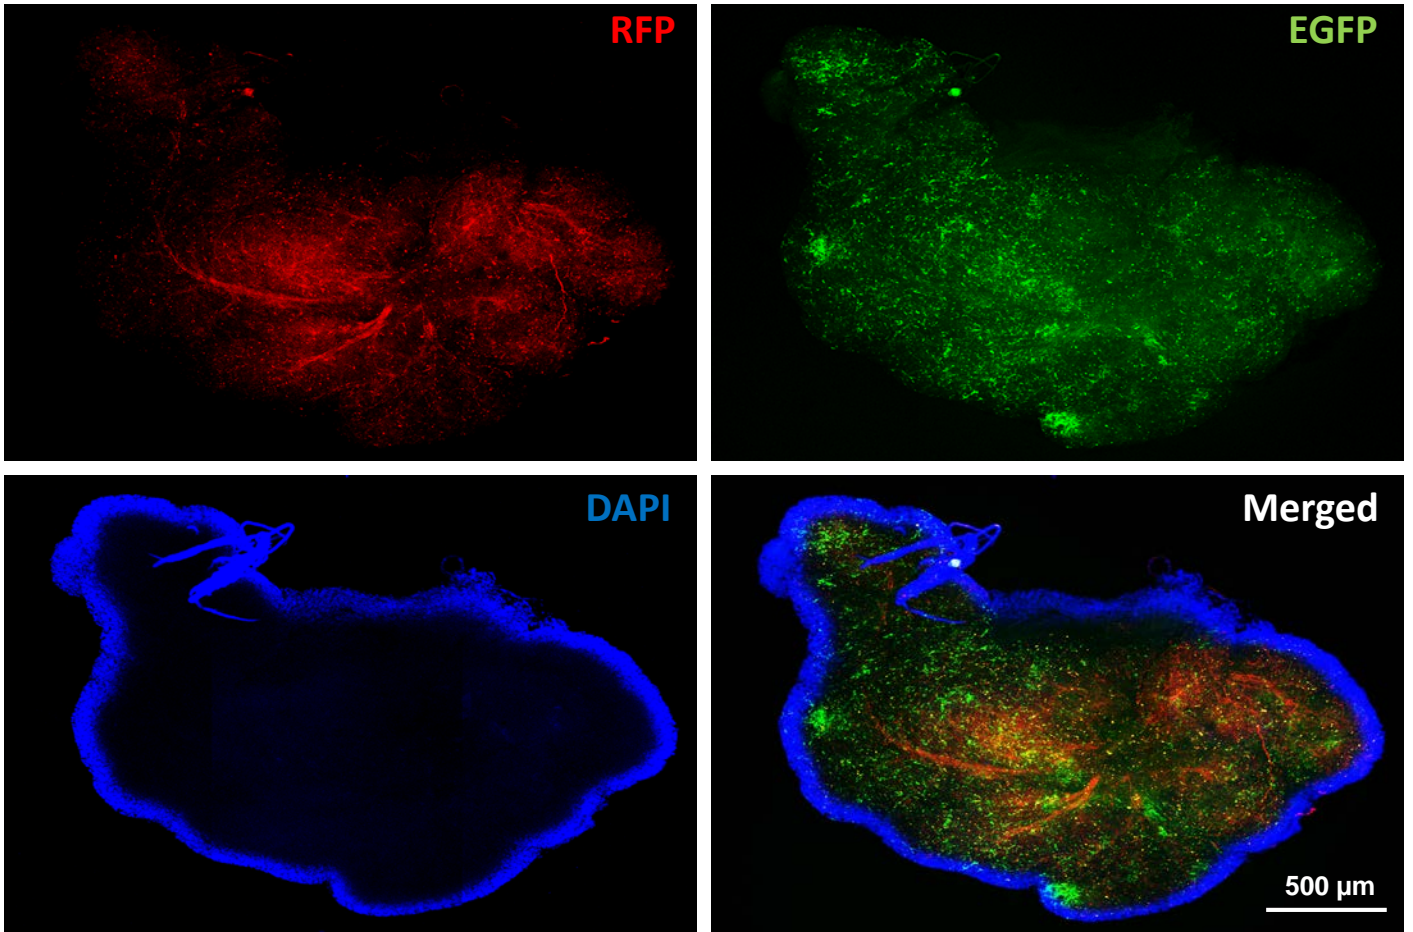

**Figure S6. Confocal microscopy of the lacrimal gland of a naïve 8-week old, male miR-183C SNS-CKO mouse demonstrating Nav1.8+ sensory nerves (RFP), resident myeloid cells (Csf1r-EGFP+).**

**Table S1. Differentially expressed genes in the cornea of SNS-CKO vs age- and sex-matched WT control mice.**

| Gene                     | log2FC   | logCPM    | LR       | PValue      | FDR      | WT1 | WT2 | WT3 | WT4 | SNS-CKO1 | SNS-CKO2 | SNS-CKO3 |
|--------------------------|----------|-----------|----------|-------------|----------|-----|-----|-----|-----|----------|----------|----------|
| <b>Upregulated genes</b> |          |           |          |             |          |     |     |     |     |          |          |          |
| Alox12e                  | 5.744557 | 1.895268  | 8.708509 | 0.003167282 | 1        | 0   | 0   | 0   | 0   | 11       | 2        | 2        |
| Map6d1                   | 5.393847 | 1.196294  | 17.44917 | 2.95093E-05 | 0.176938 | 0   | 0   | 0   | 0   | 3        | 4        | 6        |
| Krt33a                   | 5.206359 | -0.53559  | 6.651936 | 0.009904815 | 1        | 0   | 0   | 0   | 0   | 0        | 6        | 5        |
| Gm12250                  | 5.038457 | 0.426501  | 7.784959 | 0.0052683   | 1        | 0   | 0   | 0   | 0   | 0        | 5        | 5        |
| Bsn                      | 4.96783  | 1.965668  | 12.01708 | 0.000527152 | 0.629451 | 0   | 0   | 0   | 0   | 8        | 0        | 1        |
| Gm4491                   | 4.854643 | -0.43549  | 7.167472 | 0.007423732 | 1        | 0   | 0   | 0   | 0   | 0        | 4        | 5        |
| 1700124L1                | 4.804593 | 0.070478  | 10.92271 | 0.000949925 | 0.68349  | 0   | 0   | 0   | 0   | 1        | 5        | 2        |
| LOC10816                 | 4.792791 | -0.038804 | 8.413856 | 0.003723721 | 1        | 0   | 0   | 0   | 0   | 0        | 5        | 3        |
| Gm10145                  | 4.651099 | -0.408357 | 3.854262 | 0.049619759 | 1        | 0   | 0   | 0   | 0   | 0        | 6        | 0        |
| Pcdhb4                   | 4.623123 | 0.605903  | 10.74319 | 0.001046637 | 0.719982 | 0   | 0   | 0   | 0   | 2        | 0        | 6        |
| Gm31054                  | 4.600008 | -0.413184 | 4.166684 | 0.041226418 | 1        | 0   | 0   | 0   | 0   | 2        | 4        | 0        |
| Gm35189                  | 4.598662 | -0.111219 | 5.734792 | 0.016632037 | 1        | 0   | 0   | 0   | 0   | 1        | 5        | 0        |
| Lta                      | 4.578327 | -0.481214 | 3.955598 | 0.046715705 | 1        | 0   | 0   | 0   | 0   | 3        | 3        | 0        |
| AI607873                 | 4.564751 | 0.134738  | 7.07993  | 0.007795206 | 1        | 0   | 0   | 0   | 0   | 1        | 5        | 0        |
| Fer1f6                   | 4.560222 | -0.527156 | 5.400802 | 0.020127498 | 1        | 0   | 0   | 0   | 0   | 3        | 3        | 0        |
| 4933405L1                | 4.553783 | -0.82898  | 3.979162 | 0.046066468 | 1        | 0   | 0   | 0   | 0   | 4        | 2        | 0        |
| Tssk2                    | 4.545363 | -0.322582 | 6.060421 | 0.013824473 | 1        | 0   | 0   | 0   | 0   | 2        | 2        | 3        |
| A3gal2                   | 4.54153  | 3.993757  | 11.48057 | 0.000703275 | 0.632525 | 0   | 0   | 0   | 0   | 6        | 0        | 1        |
| Cnr1                     | 4.535296 | 3.569055  | 10.9956  | 0.000913283 | 0.679882 | 0   | 0   | 0   | 0   | 1        | 3        | 3        |
| Ptprt                    | 4.530924 | 5.136015  | 11.63198 | 0.000648275 | 0.632525 | 0   | 0   | 0   | 0   | 3        | 2        | 2        |
| Plk3                     | 4.519882 | 1.091222  | 9.806614 | 0.001738854 | 0.919956 | 0   | 0   | 0   | 0   | 4        | 0        | 3        |
| Cct8l1                   | 4.504517 | -0.703861 | 3.971084 | 0.046287962 | 1        | 0   | 0   | 0   | 0   | 6        | 0        | 0        |
| Gm36569                  | 4.467852 | -0.774805 | 4.773009 | 0.028909254 | 1        | 0   | 0   | 0   | 0   | 3        | 2        | 1        |
| Gm35466                  | 4.466101 | 0.541478  | 8.51455  | 0.003523181 | 1        | 0   | 0   | 0   | 0   | 3        | 0        | 4        |
| Gm36482                  | 4.405166 | 0.200164  | 7.151246 | 0.007491193 | 1        | 0   | 0   | 0   | 0   | 0        | 4        | 2        |
| Gm38918                  | 4.388242 | -0.722148 | 3.910592 | 0.047982698 | 1        | 0   | 0   | 0   | 0   | 0        | 5        | 0        |
| Asb17os                  | 4.369891 | -0.085744 | 4.766244 | 0.029023082 | 1        | 0   | 0   | 0   | 0   | 0        | 5        | 0        |
| Gm31613                  | 4.355823 | -0.771534 | 4.192121 | 0.040612246 | 1        | 0   | 0   | 0   | 0   | 1        | 4        | 0        |
| Gm40515                  | 4.338819 | -0.743056 | 4.083312 | 0.043308691 | 1        | 0   | 0   | 0   | 0   | 0        | 0        | 8        |
| 9530080O                 | 4.338708 | -0.429781 | 4.302277 | 0.038061384 | 1        | 0   | 0   | 0   | 0   | 4        | 0        | 2        |
| BB283400                 | 4.338654 | -0.185832 | 4.860435 | 0.027479409 | 1        | 0   | 0   | 0   | 0   | 4        | 0        | 2        |
| Gm36139                  | 4.335562 | 0.352401  | 5.86347  | 0.015458285 | 1        | 0   | 0   | 0   | 0   | 0        | 5        | 0        |
| A930017K                 | 4.32587  | -0.114393 | 6.097008 | 0.013541094 | 1        | 0   | 0   | 0   | 0   | 0        | 5        | 0        |
| Gm34061                  | 4.308417 | -0.156284 | 5.537291 | 0.01861538  | 1        | 0   | 0   | 0   | 0   | 0        | 1        | 6        |
| Gm4632                   | 4.302383 | -0.67111  | 4.119027 | 0.042403462 | 1        | 0   | 0   | 0   | 0   | 3        | 2        | 0        |
| 4930443O                 | 4.283508 | -0.605242 | 5.504857 | 0.018963734 | 1        | 0   | 0   | 0   | 0   | 2        | 1        | 3        |
| Gm38615                  | 4.26878  | 0.043245  | 6.785908 | 0.009188026 | 1        | 0   | 0   | 0   | 0   | 1        | 4        | 0        |
| Gm40520                  | 4.268254 | -0.886897 | 4.017815 | 0.045022015 | 1        | 0   | 0   | 0   | 0   | 0        | 4        | 1        |
| Tmprss12                 | 4.243762 | -0.579083 | 5.281516 | 0.021552979 | 1        | 0   | 0   | 0   | 0   | 0        | 4        | 1        |
| Klhl6                    | 4.218319 | 0.3796    | 5.920856 | 0.014962691 | 1        | 0   | 0   | 0   | 0   | 5        | 0        | 0        |
| Oxt                      | 4.213641 | -0.459048 | 5.980759 | 0.014462777 | 1        | 0   | 0   | 0   | 0   | 1        | 1        | 4        |
| E030042O                 | 4.206104 | -0.164046 | 6.53715  | 0.010564447 | 1        | 0   | 0   | 0   | 0   | 2        | 0        | 4        |
| 1700057H                 | 4.199506 | -0.755279 | 4.946305 | 0.026146497 | 1        | 0   | 0   | 0   | 0   | 2        | 2        | 1        |
| Gm40835                  | 4.199153 | -0.42061  | 4.923669 | 0.026491207 | 1        | 0   | 0   | 0   | 0   | 1        | 1        | 4        |
| 5033417F2                | 4.18175  | 0.448342  | 7.041082 | 0.007966088 | 1        | 0   | 0   | 0   | 0   | 5        | 0        | 0        |
| Gm16168                  | 4.172342 | 1.504658  | 7.926606 | 0.004871308 | 1        | 0   | 0   | 0   | 0   | 0        | 5        | 0        |
| Colq                     | 4.143395 | 1.719034  | 7.811403 | 0.005191757 | 1        | 0   | 0   | 0   | 0   | 4        | 1        | 0        |
| Gm33622                  | 4.108331 | -0.10624  | 6.787702 | 0.009178797 | 1        | 0   | 0   | 0   | 0   | 0        | 3        | 2        |
| Gm33787                  | 4.108168 | -0.832368 | 5.251361 | 0.021929606 | 1        | 0   | 0   | 0   | 0   | 1        | 2        | 2        |
| Kcnh5                    | 4.106478 | 1.675033  | 7.513322 | 0.006124431 | 1        | 0   | 0   | 0   | 0   | 4        | 0        | 1        |
| Gm26871                  | 4.106259 | 3.99989   | 8.219217 | 0.004144907 | 1        | 0   | 0   | 0   | 0   | 1        | 4        | 0        |
| Nlgn1                    | 4.07725  | 3.576275  | 8.334873 | 0.003889119 | 1        | 0   | 0   | 0   | 0   | 1        | 4        | 0        |
| Gm42105                  | 4.066364 | 0.614005  | 7.039444 | 0.00797338  | 1        | 0   | 0   | 0   | 0   | 3        | 0        | 2        |
| Gm32725                  | 4.064916 | -0.326632 | 3.844676 | 0.049904155 | 1        | 0   | 0   | 0   | 0   | 0        | 4        | 0        |
| Gm41665                  | 4.064003 | -0.138997 | 6.192383 | 0.012830133 | 1        | 0   | 0   | 0   | 0   | 3        | 0        | 2        |
| Gm8369                   | 4.027311 | -0.652544 | 4.029073 | 0.044722519 | 1        | 0   | 0   | 0   | 0   | 1        | 3        | 0        |
| A330102I1                | 4.015847 | 2.562897  | 7.791544 | 0.005249133 | 1        | 0   | 0   | 0   | 0   | 0        | 0        | 5        |
| F420015M                 | 3.979298 | 0.076942  | 6.748129 | 0.009384607 | 1        | 0   | 0   | 0   | 0   | 0        | 1        | 4        |
| Gm33037                  | 3.971179 | -0.889015 | 4.801257 | 0.02843898  | 1        | 0   | 0   | 0   | 0   | 2        | 0        | 3        |
| Gm30938                  | 3.952387 | 0.182705  | 5.800756 | 0.016019284 | 1        | 0   | 0   | 0   | 0   | 0        | 4        | 0        |
| Fer1f5                   | 3.948356 | 0.47178   | 6.317916 | 0.011952402 | 1        | 0   | 0   | 0   | 0   | 1        | 0        | 4        |
| Igfbpl1                  | 3.932841 | -0.040255 | 5.772514 | 0.016278726 | 1        | 0   | 0   | 0   | 0   | 1        | 3        | 0        |
| Dnah9                    | 3.923767 | -0.166202 | 4.445617 | 0.034990953 | 1        | 0   | 0   | 0   | 0   | 4        | 0        | 0        |
| Gm8615                   | 3.914328 | -0.573253 | 4.799392 | 0.028469787 | 1        | 0   | 0   | 0   | 0   | 4        | 0        | 0        |
| A230052G                 | 3.913774 | 0.609562  | 6.102117 | 0.013502001 | 1        | 0   | 0   | 0   | 0   | 0        | 4        | 0        |
| 3830403N                 | 3.894174 | -0.673578 | 5.034889 | 0.024841682 | 1        | 0   | 0   | 0   | 0   | 1        | 0        | 4        |
| Thpo                     | 3.89381  | -0.359214 | 4.219753 | 0.039955983 | 1        | 0   | 0   | 0   | 0   | 0        | 1        | 4        |
| Gm26908                  | 3.881896 | -0.272107 | 6.033974 | 0.014033102 | 1        | 0   | 0   | 0   | 0   | 0        | 0        | 5        |
| Gm42312                  | 3.854632 | -0.507917 | 4.087092 | 0.043211926 | 1        | 0   | 0   | 0   | 0   | 2        | 1        | 1        |
| Gm11454                  | 3.841327 | 1.209212  | 6.359561 | 0.011675039 | 1        | 0   | 0   | 0   | 0   | 2        | 2        | 0        |
| LOC10524                 | 3.825534 | 1.396114  | 6.49229  | 0.010834331 | 1        | 0   | 0   | 0   | 0   | 1        | 3        | 0        |

|           |          |           |          |             |          |   |   |   |   |    |    |   |
|-----------|----------|-----------|----------|-------------|----------|---|---|---|---|----|----|---|
| Arhgef15  | 3.79753  | 1.403113  | 5.923182 | 0.014942949 | 1        | 0 | 0 | 0 | 0 | 3  | 0  | 1 |
| Amer3     | 3.796936 | 2.644347  | 6.617686 | 0.010097096 | 1        | 0 | 0 | 0 | 0 | 0  | 4  | 0 |
| Nell2     | 3.796099 | 2.80924   | 6.604533 | 0.010171946 | 1        | 0 | 0 | 0 | 0 | 1  | 3  | 0 |
| Gm34403   | 3.771931 | -0.812694 | 5.196747 | 0.022629194 | 1        | 0 | 0 | 0 | 0 | 0  | 2  | 2 |
| Ncf4      | 3.769818 | -0.304105 | 4.144931 | 0.041759353 | 1        | 0 | 0 | 0 | 0 | 0  | 0  | 5 |
| Endou     | 3.769396 | 0.505831  | 5.734012 | 0.016639425 | 1        | 0 | 0 | 0 | 0 | 0  | 2  | 2 |
| Gm29485   | 3.749456 | -0.446947 | 4.586711 | 0.032220789 | 1        | 0 | 0 | 0 | 0 | 1  | 1  | 2 |
| Sec14l5   | 3.736502 | 2.944059  | 6.428949 | 0.011227502 | 1        | 0 | 0 | 0 | 0 | 0  | 0  | 4 |
| Oas1f     | 3.72608  | -0.814972 | 4.666736 | 0.030752317 | 1        | 0 | 0 | 0 | 0 | 2  | 0  | 2 |
| Prr32     | 3.723024 | -0.541392 | 4.456201 | 0.034774751 | 1        | 0 | 0 | 0 | 0 | 2  | 0  | 2 |
| Gm33248   | 3.662406 | -0.065116 | 4.565253 | 0.032626858 | 1        | 0 | 0 | 0 | 1 | 10 | 0  | 2 |
| Gm40586   | 3.64722  | 0.084761  | 4.190835 | 0.040643064 | 1        | 0 | 0 | 0 | 0 | 0  | 1  | 3 |
| LOC10816  | 3.638919 | -0.503654 | 4.593127 | 0.032100407 | 1        | 0 | 0 | 0 | 0 | 1  | 0  | 3 |
| Bank1     | 3.621975 | 0.897016  | 5.279415 | 0.021578995 | 1        | 0 | 0 | 0 | 0 | 0  | 0  | 4 |
| Gm41611   | 3.616353 | 0.630983  | 5.216869 | 0.022368784 | 1        | 0 | 0 | 0 | 0 | 0  | 0  | 4 |
| LOC10816  | 3.612206 | -0.727699 | 3.957326 | 0.046667776 | 1        | 0 | 0 | 0 | 0 | 1  | 0  | 3 |
| Cd37      | 3.546553 | 0.033408  | 4.304032 | 0.038022122 | 1        | 0 | 0 | 0 | 0 | 1  | 2  | 0 |
| Ngf       | 3.531348 | -0.282098 | 4.17831  | 0.0409445   | 1        | 0 | 0 | 0 | 0 | 0  | 0  | 4 |
| Gm41561   | 3.531185 | -0.561138 | 4.17612  | 0.04099745  | 1        | 0 | 0 | 0 | 0 | 0  | 0  | 4 |
| Gm32315   | 3.516864 | -0.181754 | 3.929662 | 0.047441488 | 1        | 0 | 0 | 0 | 0 | 3  | 0  | 0 |
| Gm35312   | 3.51571  | -0.246059 | 3.951413 | 0.046832022 | 1        | 0 | 0 | 0 | 0 | 3  | 0  | 0 |
| Stmnd1    | 3.514988 | -0.708603 | 4.339578 | 0.037236146 | 1        | 0 | 0 | 0 | 0 | 2  | 1  | 0 |
| Gm5486    | 3.488931 | 0.11353   | 4.555973 | 0.032804113 | 1        | 0 | 0 | 0 | 0 | 2  | 1  | 0 |
| Gm36082   | 3.48382  | 0.447698  | 4.406433 | 0.035803638 | 1        | 0 | 0 | 0 | 0 | 3  | 0  | 0 |
| Gm40647   | 3.46649  | 1.500094  | 4.779108 | 0.028807044 | 1        | 0 | 0 | 0 | 0 | 1  | 2  | 0 |
| Lrguk     | 3.459668 | 1.338756  | 4.856081 | 0.027548838 | 1        | 0 | 0 | 0 | 0 | 0  | 3  | 0 |
| Hspa12b   | 3.455881 | 0.680033  | 4.659324 | 0.030885351 | 1        | 0 | 0 | 0 | 0 | 3  | 0  | 0 |
| Mgat4c    | 3.444737 | 2.063534  | 4.860388 | 0.027480149 | 1        | 0 | 0 | 0 | 0 | 1  | 2  | 0 |
| Ikzf1     | 3.444717 | 1.486266  | 4.737584 | 0.02951049  | 1        | 0 | 0 | 0 | 0 | 3  | 0  | 0 |
| D630003N  | 3.441893 | 1.472033  | 4.823453 | 0.028075047 | 1        | 0 | 0 | 0 | 0 | 2  | 1  | 0 |
| Gm30363   | 3.43696  | 0.560761  | 4.916763 | 0.02659731  | 1        | 0 | 0 | 0 | 0 | 0  | 3  | 0 |
| Cxcl10    | 3.434563 | 0.973066  | 4.800433 | 0.028452593 | 1        | 0 | 0 | 0 | 0 | 3  | 0  | 0 |
| Cntnap5b  | 3.434518 | 1.353137  | 4.89403  | 0.026949707 | 1        | 0 | 0 | 0 | 0 | 1  | 2  | 0 |
| Stx1b     | 3.432291 | 5.57315   | 11.96398 | 0.000542388 | 0.629451 | 0 | 1 | 0 | 0 | 3  | 6  | 2 |
| LOC10263  | 3.430924 | -0.907512 | 3.938893 | 0.047181816 | 1        | 0 | 0 | 0 | 0 | 1  | 1  | 1 |
| Mmp17     | 3.428427 | 1.830258  | 4.835108 | 0.027885896 | 1        | 0 | 0 | 0 | 0 | 3  | 0  | 0 |
| LOC10263  | 3.41783  | 0.475805  | 10.07881 | 0.001499842 | 0.884563 | 1 | 1 | 0 | 1 | 13 | 8  | 3 |
| Trp53cor1 | 3.409102 | 1.329926  | 4.772828 | 0.028912291 | 1        | 0 | 0 | 0 | 0 | 0  | 2  | 1 |
| B3gnt5    | 3.409028 | 2.607441  | 4.952026 | 0.026060112 | 1        | 0 | 0 | 0 | 0 | 2  | 1  | 0 |
| Nanos3    | 3.401309 | 0.161121  | 4.291655 | 0.038299867 | 1        | 0 | 0 | 0 | 0 | 2  | 0  | 1 |
| Pde10a    | 3.399045 | 2.695419  | 4.890128 | 0.027010681 | 1        | 0 | 0 | 0 | 0 | 0  | 2  | 1 |
| Mfsd2b    | 3.398817 | 0.480283  | 4.481607 | 0.034261486 | 1        | 0 | 0 | 0 | 0 | 2  | 0  | 1 |
| B3galt1   | 3.388696 | 5.062203  | 4.986901 | 0.025539911 | 1        | 0 | 0 | 0 | 0 | 1  | 1  | 1 |
| Slc7a14   | 3.387554 | 5.47207   | 5.005009 | 0.025274066 | 1        | 0 | 0 | 0 | 0 | 1  | 1  | 1 |
| Tmem233   | 3.383453 | 5.293149  | 4.976878 | 0.025688299 | 1        | 0 | 0 | 0 | 0 | 0  | 1  | 2 |
| Trpa1     | 3.380646 | 3.587977  | 4.933464 | 0.026341471 | 1        | 0 | 0 | 0 | 0 | 0  | 1  | 2 |
| Apc2      | 3.372017 | 4.320179  | 4.92707  | 0.026439115 | 1        | 0 | 0 | 0 | 0 | 0  | 0  | 3 |
| Galnt16   | 3.368704 | 3.440185  | 4.904921 | 0.026780283 | 1        | 0 | 0 | 0 | 0 | 0  | 0  | 3 |
| Tldc2     | 3.334304 | 0.967186  | 4.310253 | 0.037883326 | 1        | 0 | 0 | 0 | 0 | 1  | 0  | 2 |
| Scrg1     | 3.329266 | 0.868509  | 4.63084  | 0.031402192 | 1        | 0 | 0 | 0 | 0 | 0  | 0  | 3 |
| Gm34489   | 3.310411 | -0.652716 | 3.902505 | 0.048214167 | 1        | 0 | 0 | 0 | 0 | 1  | 0  | 2 |
| Slc9a3    | 3.277828 | 0.284198  | 4.242805 | 0.039417002 | 1        | 0 | 0 | 0 | 0 | 0  | 0  | 3 |
| Itga10    | 3.259853 | 0.709244  | 14.07303 | 0.000175847 | 0.486636 | 0 | 1 | 0 | 2 | 3  | 14 | 5 |
| Gm40207   | 3.245348 | -0.572539 | 3.977911 | 0.046100708 | 1        | 0 | 0 | 0 | 0 | 0  | 0  | 3 |
| Dubr      | 3.233191 | 3.33905   | 9.407239 | 0.002161304 | 1        | 1 | 0 | 0 | 0 | 4  | 1  | 5 |
| LOC10816  | 3.145839 | 0.112797  | 6.279622 | 0.012213418 | 1        | 1 | 0 | 0 | 0 | 4  | 0  | 6 |
| A230103J1 | 3.102962 | 0.437967  | 5.071359 | 0.024324303 | 1        | 1 | 0 | 0 | 0 | 1  | 6  | 1 |
| LOC10524  | 3.098762 | -0.217429 | 5.543584 | 0.018548557 | 1        | 0 | 1 | 0 | 0 | 2  | 2  | 5 |
| Gm10369   | 3.073928 | 0.101199  | 4.043939 | 0.044330236 | 1        | 0 | 1 | 0 | 0 | 0  | 3  | 6 |
| Gm41283   | 3.062227 | 1.133226  | 5.829611 | 0.015758608 | 1        | 1 | 0 | 0 | 0 | 3  | 4  | 1 |
| Gm13032   | 3.026761 | -0.457513 | 5.607958 | 0.017879083 | 1        | 0 | 1 | 0 | 0 | 1  | 4  | 3 |
| Hist1h2af | 2.977426 | -0.725121 | 6.762213 | 0.009310823 | 1        | 0 | 1 | 0 | 0 | 3  | 2  | 3 |
| Neurl3    | 2.96028  | -0.031128 | 4.17447  | 0.041037399 | 1        | 0 | 0 | 0 | 1 | 6  | 1  | 0 |
| Gm13383   | 2.845092 | -0.462837 | 3.849483 | 0.049761326 | 1        | 1 | 0 | 0 | 0 | 0  | 3  | 5 |
| Clgn      | 2.771918 | 6.318102  | 6.672551 | 0.009790895 | 1        | 0 | 0 | 0 | 1 | 0  | 5  | 2 |
| Rbm11     | 2.767744 | 4.61677   | 6.70261  | 0.00962719  | 1        | 0 | 0 | 1 | 0 | 4  | 2  | 1 |
| Ccdc146   | 2.753038 | 0.123495  | 3.994717 | 0.045643114 | 1        | 0 | 0 | 0 | 1 | 0  | 3  | 4 |
| Tmem8     | 2.746229 | 4.489702  | 6.571632 | 0.010361687 | 1        | 1 | 0 | 0 | 0 | 1  | 1  | 5 |
| Ceacam10  | 2.738624 | 0.68087   | 5.746941 | 0.016517393 | 1        | 0 | 1 | 0 | 0 | 3  | 0  | 4 |
| Trpv1     | 2.732715 | 3.886204  | 6.314237 | 0.011977225 | 1        | 0 | 0 | 1 | 0 | 0  | 2  | 5 |
| 1700024P1 | 2.705243 | 0.165624  | 4.672368 | 0.030651629 | 1        | 0 | 0 | 0 | 1 | 2  | 4  | 0 |
| Gm10037   | 2.65408  | 0.277629  | 4.436123 | 0.035186065 | 1        | 0 | 0 | 0 | 1 | 2  | 3  | 1 |
| Vash1     | 2.548649 | 5.281637  | 5.393488 | 0.020212034 | 1        | 0 | 0 | 1 | 0 | 0  | 4  | 2 |
| Lrrc16b   | 2.515554 | 3.812149  | 5.081573 | 0.024181426 | 1        | 0 | 1 | 0 | 0 | 0  | 0  | 6 |

|           |          |           |          |             |          |    |    |   |    |    |    |    |
|-----------|----------|-----------|----------|-------------|----------|----|----|---|----|----|----|----|
| Casp1     | 2.448184 | 1.703573  | 5.514702 | 0.018857287 | 1        | 2  | 0  | 0 | 0  | 6  | 3  | 0  |
| Erdr1     | 2.433583 | 1.227452  | 4.725655 | 0.029715872 | 1        | 0  | 7  | 1 | 7  | 13 | 0  | 57 |
| 5430431A: | 2.390039 | 0.53371   | 5.662808 | 0.01732836  | 1        | 1  | 0  | 0 | 2  | 2  | 1  | 12 |
| Rbfox3    | 2.350032 | 7.779519  | 6.851179 | 0.008858279 | 1        | 1  | 0  | 0 | 1  | 3  | 6  | 0  |
| LOC108161 | 2.347042 | -0.04942  | 4.24949  | 0.039262128 | 1        | 0  | 0  | 1 | 2  | 1  | 2  | 12 |
| Apba1     | 2.338504 | 7.011977  | 6.798444 | 0.009123735 | 1        | 0  | 0  | 0 | 2  | 1  | 4  | 4  |
| Stard6    | 2.332403 | 0.606954  | 4.256898 | 0.039091232 | 1        | 1  | 0  | 0 | 1  | 3  | 2  | 4  |
| Gm17399   | 2.310033 | 0.709472  | 4.208644 | 0.040218484 | 1        | 0  | 0  | 1 | 2  | 1  | 3  | 10 |
| Diras1    | 2.304331 | 6.615922  | 4.054499 | 0.044053781 | 1        | 0  | 0  | 0 | 1  | 3  | 1  | 1  |
| P2rx6     | 2.303249 | 4.027186  | 4.016282 | 0.04506295  | 1        | 0  | 1  | 0 | 0  | 1  | 2  | 2  |
| Ccdc74a   | 2.284994 | 4.189504  | 3.965535 | 0.046440772 | 1        | 0  | 0  | 1 | 0  | 0  | 1  | 4  |
| Nfkbid    | 2.25879  | 0.308962  | 3.852889 | 0.049660383 | 1        | 0  | 0  | 0 | 2  | 5  | 1  | 2  |
| Lyve1     | 2.226739 | 1.715069  | 4.251924 | 0.039205898 | 1        | 0  | 0  | 2 | 0  | 8  | 0  | 0  |
| Foxn1     | 2.197128 | -0.192117 | 4.16111  | 0.041362281 | 1        | 2  | 1  | 1 | 0  | 10 | 3  | 1  |
| Lrrc32    | 2.152644 | 0.869213  | 4.435365 | 0.035201694 | 1        | 1  | 0  | 2 | 0  | 1  | 5  | 6  |
| Gm32462   | 2.145036 | 0.099154  | 4.485217 | 0.034189206 | 1        | 2  | 0  | 0 | 1  | 5  | 0  | 7  |
| Kcng2     | 2.079045 | 1.986629  | 4.178185 | 0.040947529 | 1        | 1  | 0  | 0 | 1  | 1  | 6  | 0  |
| Il15      | 2.066023 | 1.067528  | 8.780174 | 0.003045221 | 1        | 4  | 3  | 0 | 3  | 5  | 7  | 23 |
| Neil2     | 2.065633 | 1.99628   | 4.066288 | 0.043747315 | 1        | 1  | 0  | 1 | 0  | 2  | 0  | 6  |
| Ccdc177   | 2.058998 | 1.829891  | 4.827421 | 0.028010507 | 1        | 0  | 3  | 0 | 0  | 3  | 0  | 8  |
| Gper1     | 2.058236 | 0.405049  | 4.302319 | 0.038060448 | 1        | 0  | 0  | 3 | 0  | 2  | 2  | 8  |
| Mrc1      | 2.054748 | 3.547076  | 7.319689 | 0.006820322 | 1        | 0  | 4  | 0 | 0  | 3  | 1  | 10 |
| Mum1l1    | 2.021368 | 1.028288  | 3.986917 | 0.045854881 | 1        | 1  | 2  | 0 | 0  | 4  | 2  | 4  |
| Mkx       | 2.008812 | 2.295658  | 5.451559 | 0.019550872 | 1        | 1  | 1  | 0 | 1  | 5  | 2  | 3  |
| Sptbn4    | 1.997318 | 3.954989  | 4.384598 | 0.036265044 | 1        | 1  | 0  | 0 | 1  | 4  | 2  | 1  |
| Pcsk2os1  | 1.995741 | 1.901172  | 3.998537 | 0.045539781 | 1        | 0  | 1  | 1 | 0  | 0  | 4  | 3  |
| Serpind1  | 1.978245 | 3.530247  | 4.242462 | 0.039424944 | 1        | 2  | 0  | 0 | 0  | 2  | 1  | 4  |
| Adam11    | 1.977587 | 5.858257  | 4.328561 | 0.037477921 | 1        | 1  | 0  | 0 | 1  | 1  | 0  | 6  |
| Gm15663   | 1.96812  | 1.589493  | 5.034369 | 0.02484914  | 1        | 1  | 0  | 1 | 3  | 6  | 3  | 7  |
| Radil     | 1.92603  | 1.986357  | 4.380778 | 0.036346408 | 1        | 1  | 0  | 2 | 0  | 3  | 2  | 5  |
| Calhm2    | 1.88592  | 1.505015  | 9.237378 | 0.002371243 | 1        | 2  | 5  | 3 | 3  | 9  | 8  | 22 |
| Ras10b    | 1.859218 | 4.316665  | 6.320775 | 0.011933144 | 1        | 3  | 0  | 0 | 1  | 5  | 0  | 7  |
| Zfp423    | 1.842787 | 4.007499  | 15.12183 | 0.000100791 | 0.302172 | 1  | 3  | 8 | 0  | 14 | 6  | 14 |
| Ggt7      | 1.839568 | 3.304212  | 4.380395 | 0.036354571 | 1        | 0  | 2  | 1 | 0  | 3  | 2  | 4  |
| Gm7120    | 1.82645  | 2.278979  | 6.89876  | 0.008625553 | 1        | 4  | 3  | 0 | 3  | 9  | 1  | 20 |
| Nipa1     | 1.824424 | 3.432074  | 13.15431 | 0.000286859 | 0.509334 | 4  | 4  | 2 | 4  | 16 | 5  | 18 |
| Gjc1      | 1.820244 | 2.369408  | 4.264216 | 0.038923215 | 1        | 1  | 0  | 0 | 2  | 3  | 1  | 5  |
| Gm31686   | 1.816295 | 0.185901  | 3.951946 | 0.046817189 | 1        | 1  | 3  | 1 | 3  | 11 | 5  | 4  |
| Zscan18   | 1.814652 | 1.879812  | 4.109741 | 0.042636887 | 1        | 2  | 0  | 1 | 1  | 3  | 6  | 2  |
| Gria2     | 1.782612 | 4.818001  | 10.86    | 0.000982636 | 0.693163 | 2  | 5  | 2 | 0  | 7  | 1  | 17 |
| Slc7a11   | 1.77667  | 2.067259  | 5.055935 | 0.024541731 | 1        | 0  | 4  | 1 | 0  | 1  | 1  | 13 |
| 6330549D: | 1.768939 | 1.345885  | 6.946931 | 0.008396318 | 1        | 2  | 8  | 3 | 1  | 5  | 19 | 10 |
| Ebf1      | 1.75531  | 7.425499  | 13.00014 | 0.000311467 | 0.509334 | 4  | 5  | 2 | 0  | 10 | 8  | 11 |
| Cldn19    | 1.748    | 6.710272  | 5.378835 | 0.020382484 | 1        | 0  | 1  | 2 | 1  | 5  | 2  | 4  |
| Ncf1      | 1.743232 | 1.675562  | 4.190254 | 0.040657007 | 1        | 1  | 0  | 3 | 0  | 4  | 4  | 3  |
| Snap91    | 1.741611 | 6.158616  | 5.424572 | 0.019855302 | 1        | 1  | 2  | 0 | 1  | 2  | 1  | 8  |
| Gm14322   | 1.716397 | 1.851711  | 8.79543  | 0.003019861 | 1        | 2  | 5  | 3 | 8  | 7  | 11 | 30 |
| P4ha3     | 1.664026 | 3.505528  | 4.760009 | 0.029128392 | 1        | 0  | 1  | 1 | 4  | 4  | 8  | 2  |
| 2410131K1 | 1.663336 | 3.114597  | 15.48964 | 8.29588E-05 | 0.298452 | 9  | 6  | 3 | 7  | 20 | 15 | 26 |
| B230307C: | 1.6329   | 1.610812  | 5.149057 | 0.023259001 | 1        | 9  | 9  | 1 | 7  | 12 | 19 | 30 |
| Fat3      | 1.629068 | 4.882104  | 4.327546 | 0.037500283 | 1        | 2  | 0  | 0 | 2  | 6  | 2  | 2  |
| Slc1a6    | 1.607899 | 2.114425  | 6.144413 | 0.013182794 | 1        | 0  | 3  | 4 | 4  | 9  | 12 | 3  |
| Gm41491   | 1.605604 | 1.139565  | 5.894333 | 0.015189685 | 1        | 6  | 4  | 2 | 9  | 12 | 16 | 20 |
| Jph1      | 1.60426  | 2.280723  | 5.134151 | 0.023459562 | 1        | 3  | 4  | 1 | 2  | 3  | 13 | 6  |
| Atg4d     | 1.570049 | 0.960032  | 4.646007 | 0.031125866 | 1        | 1  | 5  | 1 | 9  | 11 | 3  | 24 |
| Kcnn1     | 1.551288 | 3.590368  | 5.734146 | 0.016638155 | 1        | 1  | 3  | 4 | 0  | 6  | 8  | 4  |
| Igf2bp3   | 1.536261 | 1.704858  | 4.160128 | 0.041386277 | 1        | 3  | 1  | 1 | 7  | 10 | 7  | 9  |
| Klhdc9    | 1.533501 | 1.805518  | 6.677713 | 0.009762581 | 1        | 2  | 0  | 5 | 5  | 8  | 10 | 9  |
| 9330151L1 | 1.525604 | 1.827966  | 4.825988 | 0.028033799 | 1        | 2  | 6  | 0 | 1  | 5  | 5  | 10 |
| Snord104  | 1.523003 | 1.254315  | 4.561598 | 0.032696546 | 1        | 5  | 3  | 0 | 5  | 8  | 3  | 20 |
| Podxl2    | 1.519355 | 2.889246  | 3.929809 | 0.047437332 | 1        | 3  | 2  | 0 | 0  | 0  | 3  | 9  |
| Dusp18    | 1.482326 | 3.470024  | 6.890767 | 0.008664209 | 1        | 6  | 1  | 3 | 1  | 9  | 3  | 13 |
| Kcnmb3    | 1.441188 | 1.386567  | 3.993284 | 0.045681952 | 1        | 6  | 8  | 3 | 0  | 6  | 13 | 17 |
| Ccdc38    | 1.422929 | 1.385634  | 5.230998 | 0.022187794 | 1        | 6  | 1  | 4 | 11 | 19 | 12 | 13 |
| Ercc1     | 1.3595   | 2.133134  | 5.752027 | 0.016469643 | 1        | 3  | 9  | 2 | 6  | 10 | 12 | 16 |
| Prkg2     | 1.357261 | 4.378489  | 5.863957 | 0.01545401  | 1        | 2  | 3  | 0 | 5  | 4  | 6  | 10 |
| Gm527     | 1.353778 | 1.680453  | 4.298308 | 0.03815032  | 1        | 5  | 2  | 0 | 1  | 6  | 4  | 6  |
| Neu2      | 1.347199 | 1.5253    | 8.406358 | 0.003739109 | 1        | 9  | 11 | 2 | 13 | 14 | 25 | 26 |
| Il18bp    | 1.343387 | 1.101893  | 4.66958  | 0.03070143  | 1        | 2  | 6  | 3 | 7  | 8  | 8  | 20 |
| Plscr1    | 1.33333  | 1.176525  | 4.018899 | 0.04499308  | 1        | 3  | 6  | 6 | 10 | 11 | 13 | 26 |
| Tmem17    | 1.326181 | 2.655171  | 5.914732 | 0.015014789 | 1        | 0  | 14 | 4 | 9  | 16 | 17 | 14 |
| Lysmd2    | 1.321246 | 4.630641  | 9.955585 | 0.001603621 | 0.88998  | 12 | 4  | 0 | 6  | 7  | 7  | 21 |
| Cacna2d3  | 1.317245 | 4.677597  | 7.020958 | 0.00805611  | 1        | 4  | 3  | 6 | 1  | 6  | 12 | 9  |
| Rab40b    | 1.310456 | 1.630487  | 4.196329 | 0.040511592 | 1        | 3  | 8  | 1 | 3  | 7  | 8  | 13 |

|           |          |          |          |             |          |   |     |     |    |     |     |     |
|-----------|----------|----------|----------|-------------|----------|---|-----|-----|----|-----|-----|-----|
| Klhl13    | 1.296232 | 4.035675 | 11.50008 | 0.000695934 | 0.632525 | 6 | 11  | 4   | 5  | 19  | 9   | 21  |
| Amot      | 1.255365 | 2.482666 | 3.898514 | 0.048328839 |          | 1 | 3   | 6   | 0  | 3   | 6   | 11  |
| Hs3st1    | 1.246133 | 2.601967 | 6.685221 | 0.009721547 |          | 1 | 4   | 11  | 3  | 2   | 10  | 14  |
| Pdgfc     | 1.245231 | 2.02222  | 3.867677 | 0.049224601 |          | 1 | 5   | 7   | 3  | 5   | 16  | 4   |
| Dbn1      | 1.239039 | 5.360596 | 5.978499 | 0.014481325 |          | 1 | 6   | 3   | 6  | 1   | 9   | 4   |
| Eepd1     | 1.229643 | 5.537117 | 6.226052 | 0.01258841  |          | 1 | 0   | 7   | 2  | 4   | 1   | 5   |
| Lpcat2    | 1.219071 | 2.264138 | 6.145593 | 0.013173996 |          | 1 | 12  | 4   | 7  | 11  | 19  | 19  |
| Cyp2d22   | 1.216971 | 2.7193   | 3.881779 | 0.048812797 |          | 1 | 4   | 1   | 4  | 3   | 9   | 5   |
| St3gal6   | 1.216751 | 4.256527 | 5.914093 | 0.015020236 |          | 1 | 4   | 2   | 0  | 7   | 4   | 2   |
| Lancl3    | 1.206817 | 3.20783  | 4.435644 | 0.035195949 |          | 1 | 4   | 2   | 4  | 1   | 7   | 5   |
| Gstm6     | 1.199012 | 1.441401 | 4.584651 | 0.032259539 |          | 1 | 4   | 11  | 0  | 11  | 10  | 16  |
| Kcnip3    | 1.179971 | 6.230212 | 5.633461 | 0.017620805 |          | 1 | 2   | 5   | 3  | 3   | 8   | 3   |
| Bves      | 1.17994  | 2.460761 | 5.939885 | 0.014801984 |          | 1 | 8   | 18  | 4  | 10  | 12  | 51  |
| Ust       | 1.152655 | 4.47925  | 4.477644 | 0.034341027 |          | 1 | 5   | 4   | 2  | 0   | 5   | 7   |
| Zxdb      | 1.124193 | 2.825844 | 7.036899 | 0.007984718 |          | 1 | 12  | 20  | 19 | 16  | 36  | 32  |
| 4831440E1 | 1.122879 | 2.200511 | 5.337832 | 0.020867414 |          | 1 | 7   | 11  | 13 | 6   | 14  | 19  |
| Slc19a1   | 1.116142 | 3.47448  | 6.954368 | 0.008361483 |          | 1 | 7   | 10  | 5  | 8   | 8   | 12  |
| Zfp850    | 1.11539  | 1.665441 | 3.886642 | 0.048671655 |          | 1 | 3   | 7   | 7  | 3   | 12  | 10  |
| Igdcc4    | 1.107145 | 2.637296 | 5.180147 | 0.022846389 |          | 1 | 6   | 1   | 10 | 4   | 10  | 9   |
| Gm17059   | 1.099211 | 1.385467 | 4.156898 | 0.041465283 |          | 1 | 13  | 5   | 4  | 5   | 18  | 12  |
| Ppp4r4    | 1.092939 | 4.268135 | 3.890302 | 0.048565682 |          | 1 | 2   | 3   | 1  | 5   | 6   | 7   |
| LOC10816  | 1.092089 | 2.902805 | 7.623257 | 0.005762034 |          | 1 | 6   | 14  | 8  | 16  | 16  | 18  |
| Nceh1     | 1.047095 | 5.730114 | 8.722294 | 0.003143424 |          | 1 | 10  | 8   | 5  | 5   | 11  | 8   |
| Pcbd1     | 1.045178 | 3.407442 | 3.949447 | 0.046886779 |          | 1 | 3   | 6   | 0  | 8   | 5   | 11  |
| Kcnd3     | 1.018481 | 4.118082 | 5.306453 | 0.021246568 |          | 1 | 7   | 4   | 3  | 10  | 8   | 10  |
| Dennd4b   | 1.006291 | 3.442235 | 5.749232 | 0.01649587  |          | 1 | 8   | 11  | 3  | 6   | 10  | 13  |
| Mapk10    | 0.999596 | 7.803019 | 7.733945 | 0.005419221 |          | 1 | 11  | 4   | 6  | 8   | 17  | 7   |
| Ugcg      | 0.985433 | 4.522355 | 9.532832 | 0.002018285 | 0.981214 |   | 9   | 26  | 9  | 17  | 30  | 15  |
| 1700001LC | 0.973321 | 3.689078 | 4.287488 | 0.038393858 |          | 1 | 12  | 16  | 2  | 4   | 15  | 9   |
| Tmem86a   | 0.958362 | 3.471779 | 4.621113 | 0.031580737 |          | 1 | 9   | 10  | 7  | 5   | 8   | 19  |
| Irx3      | 0.954685 | 3.931653 | 9.06179  | 0.002610064 |          | 1 | 29  | 72  | 23 | 43  | 51  | 75  |
| Hacl1     | 0.939817 | 2.334452 | 5.076937 | 0.024246165 |          | 1 | 10  | 17  | 8  | 11  | 16  | 10  |
| 0610009B  | 0.939672 | 3.682178 | 6.682931 | 0.009734042 |          | 1 | 30  | 61  | 17 | 42  | 56  | 51  |
| Pear1     | 0.936035 | 2.301163 | 4.40447  | 0.035844867 |          | 1 | 2   | 15  | 6  | 9   | 16  | 10  |
| Fam149b   | 0.928495 | 2.836587 | 5.315205 | 0.021140102 |          | 1 | 15  | 19  | 17 | 22  | 24  | 16  |
| Cenpv     | 0.92753  | 3.147169 | 4.853903 | 0.02758365  |          | 1 | 9   | 18  | 10 | 8   | 14  | 14  |
| Get4      | 0.925307 | 2.822492 | 5.36763  | 0.020513833 |          | 1 | 14  | 13  | 8  | 18  | 16  | 19  |
| Nelfcd    | 0.917706 | 3.72935  | 7.479316 | 0.006241179 |          | 1 | 10  | 30  | 12 | 34  | 31  | 22  |
| Kdelc1    | 0.915247 | 2.49792  | 4.436922 | 0.035169595 |          | 1 | 9   | 18  | 4  | 16  | 11  | 25  |
| Lrnf1     | 0.913694 | 4.568803 | 5.047903 | 0.024655757 |          | 1 | 9   | 11  | 8  | 5   | 12  | 15  |
| Mettl22   | 0.912674 | 3.421195 | 5.157705 | 0.02314346  |          | 1 | 12  | 4   | 4  | 9   | 13  | 12  |
| Rnf225    | 0.902946 | 2.333878 | 6.295163 | 0.012106791 |          | 1 | 16  | 28  | 11 | 20  | 23  | 33  |
| Zfp41     | 0.900799 | 2.452503 | 4.371903 | 0.036536176 |          | 1 | 12  | 12  | 9  | 10  | 10  | 17  |
| Rimbp2    | 0.896033 | 4.617634 | 3.996327 | 0.045599535 |          | 1 | 7   | 2   | 2  | 8   | 17  | 3   |
| P2rx7     | 0.895075 | 3.313621 | 4.29139  | 0.038305842 |          | 1 | 13  | 16  | 8  | 11  | 26  | 16  |
| Mir703    | 0.890102 | 5.058246 | 7.006146 | 0.008123038 |          | 1 | 106 | 165 | 80 | 134 | 138 | 93  |
| Bop1      | 0.887272 | 3.528752 | 7.107157 | 0.007677677 |          | 1 | 44  | 24  | 22 | 35  | 33  | 38  |
| Map1s     | 0.86601  | 4.168351 | 5.327015 | 0.02099732  |          | 1 | 6   | 7   | 11 | 19  | 22  | 11  |
| Zfp2      | 0.865868 | 3.261108 | 4.86195  | 0.027455287 |          | 1 | 12  | 10  | 6  | 20  | 17  | 16  |
| Per2      | 0.865335 | 2.870615 | 4.016074 | 0.04506852  |          | 1 | 12  | 17  | 21 | 21  | 24  | 31  |
| Iba57     | 0.862988 | 3.038767 | 4.033638 | 0.044601676 |          | 1 | 11  | 33  | 1  | 22  | 16  | 20  |
| Angptl4   | 0.857394 | 3.747261 | 5.042304 | 0.024735575 |          | 1 | 10  | 15  | 14 | 25  | 26  | 19  |
| Trappc2   | 0.846041 | 4.198287 | 4.646034 | 0.03112538  |          | 1 | 23  | 7   | 2  | 6   | 10  | 16  |
| Tgfb1i1   | 0.844929 | 4.350356 | 3.936403 | 0.047251723 |          | 1 | 6   | 11  | 1  | 9   | 10  | 13  |
| Mettl9    | 0.843944 | 4.779333 | 8.811324 | 0.002993667 |          | 1 | 104 | 109 | 53 | 92  | 111 | 100 |
| Ooep      | 0.843219 | 2.755858 | 4.07401  | 0.043547789 |          | 1 | 25  | 39  | 20 | 30  | 46  | 45  |
| Cryl1     | 0.839541 | 3.106454 | 4.423456 | 0.035448166 |          | 1 | 17  | 23  | 15 | 31  | 41  | 20  |
| Pard6a    | 0.83027  | 3.950387 | 4.09112  | 0.04310907  |          | 1 | 10  | 22  | 7  | 15  | 25  | 15  |
| Ercc8     | 0.828987 | 2.430403 | 4.648293 | 0.031084444 |          | 1 | 14  | 19  | 12 | 17  | 18  | 20  |
| Sh3pxd2b  | 0.822605 | 4.558274 | 8.475138 | 0.003600331 |          | 1 | 9   | 20  | 14 | 30  | 18  | 28  |
| Mtx3      | 0.822335 | 3.802158 | 7.465589 | 0.006288946 |          | 1 | 23  | 22  | 10 | 30  | 30  | 35  |
| Exd2      | 0.816777 | 2.622813 | 4.105597 | 0.042741511 |          | 1 | 5   | 20  | 12 | 12  | 12  | 13  |
| Syvn1     | 0.8157   | 3.443917 | 5.446317 | 0.019609626 |          | 1 | 32  | 41  | 21 | 22  | 43  | 36  |
| Smyd2     | 0.804287 | 4.955644 | 11.21568 | 0.000811091 | 0.679882 |   | 35  | 36  | 27 | 40  | 40  | 47  |
| Pepd      | 0.794618 | 4.45653  | 11.64578 | 0.000643482 | 0.632525 |   | 43  | 47  | 29 | 60  | 64  | 57  |
| Gm33585   | 0.794147 | 2.754978 | 4.698295 | 0.030192554 |          | 1 | 18  | 23  | 38 | 47  | 41  | 55  |
| Glrb      | 0.788022 | 6.118486 | 11.03917 | 0.000892067 | 0.679882 |   | 35  | 41  | 24 | 40  | 83  | 20  |
| Fam136a   | 0.787259 | 3.640449 | 5.979142 | 0.014476041 |          | 1 | 40  | 57  | 22 | 28  | 55  | 43  |
| Rtn4rl1   | 0.780179 | 5.014445 | 4.035251 | 0.044559049 |          | 1 | 7   | 13  | 3  | 4   | 7   | 7   |
| Cygb      | 0.778878 | 6.32644  | 5.863405 | 0.015458861 |          | 1 | 5   | 25  | 4  | 10  | 21  | 11  |
| Xk        | 0.77718  | 3.894724 | 9.007037 | 0.00268942  |          | 1 | 21  | 32  | 10 | 30  | 38  | 36  |
| Tmem177   | 0.758994 | 2.999904 | 4.311513 | 0.037855277 |          | 1 | 8   | 14  | 11 | 16  | 11  | 13  |
| Tm7sf2    | 0.755785 | 4.011984 | 6.166543 | 0.01301888  |          | 1 | 27  | 54  | 31 | 26  | 50  | 35  |
| Reep1     | 0.755529 | 6.726211 | 5.98371  | 0.014438597 |          | 1 | 13  | 8   | 4  | 21  | 16  | 12  |



|          |          |          |          |             |          |     |     |     |     |     |     |      |
|----------|----------|----------|----------|-------------|----------|-----|-----|-----|-----|-----|-----|------|
| Usb1     | 0.749651 | 4.133819 | 7.932305 | 0.004855989 | 1        | 53  | 68  | 24  | 51  | 45  | 84  | 120  |
| Slc35b3  | 0.749591 | 3.268317 | 4.825845 | 0.028036118 | 1        | 31  | 34  | 16  | 41  | 31  | 41  | 89   |
| Cacnb3   | 0.745777 | 6.483171 | 4.7517   | 0.02926937  | 1        | 14  | 9   | 8   | 10  | 19  | 17  | 16   |
| Zfp51    | 0.744585 | 2.640263 | 4.553732 | 0.032847085 | 1        | 21  | 31  | 17  | 24  | 46  | 22  | 51   |
| Mcm4     | 0.743099 | 4.031768 | 7.561016 | 0.005964435 | 1        | 60  | 94  | 29  | 77  | 59  | 64  | 229  |
| Scarb1   | 0.738694 | 4.343585 | 6.625317 | 0.010053925 | 1        | 31  | 68  | 49  | 71  | 66  | 58  | 171  |
| Bet1     | 0.73648  | 3.307959 | 5.635416 | 0.017601172 | 1        | 25  | 35  | 17  | 29  | 33  | 30  | 76   |
| Nxt1     | 0.732544 | 3.228375 | 4.285926 | 0.038429146 | 1        | 22  | 40  | 32  | 21  | 26  | 16  | 129  |
| Pigg     | 0.731365 | 3.138817 | 4.150421 | 0.041624167 | 1        | 44  | 43  | 21  | 39  | 64  | 45  | 75   |
| Tmem170l | 0.731253 | 3.209245 | 5.54738  | 0.018508375 | 1        | 24  | 32  | 15  | 33  | 54  | 29  | 44   |
| Jam3     | 0.73018  | 5.749406 | 5.527639 | 0.018718344 | 1        | 11  | 8   | 4   | 21  | 17  | 12  | 27   |
| Fermt2   | 0.724987 | 6.322164 | 6.099121 | 0.013524912 | 1        | 13  | 18  | 26  | 18  | 27  | 24  | 47   |
| Sdhaf4   | 0.721732 | 4.624933 | 7.315073 | 0.006837863 | 1        | 33  | 61  | 42  | 58  | 55  | 44  | 164  |
| B4galt7  | 0.716121 | 3.732593 | 6.513034 | 0.010708662 | 1        | 29  | 49  | 27  | 27  | 46  | 43  | 78   |
| Xylt2    | 0.715189 | 3.380212 | 4.311334 | 0.037859261 | 1        | 10  | 16  | 10  | 23  | 18  | 18  | 39   |
| Asb1     | 0.714117 | 5.029162 | 5.637046 | 0.017584809 | 1        | 12  | 13  | 12  | 17  | 14  | 18  | 37   |
| Atg16l2  | 0.707914 | 3.111049 | 4.212038 | 0.040138087 | 1        | 17  | 11  | 16  | 22  | 25  | 20  | 40   |
| Ampd2    | 0.706658 | 3.74973  | 5.040261 | 0.024764757 | 1        | 20  | 25  | 8   | 20  | 14  | 31  | 46   |
| Mapk7    | 0.704029 | 3.268333 | 4.380324 | 0.036356096 | 1        | 31  | 28  | 19  | 19  | 29  | 28  | 71   |
| Dnajc27  | 0.696148 | 4.428801 | 4.273569 | 0.038709554 | 1        | 15  | 11  | 11  | 13  | 20  | 18  | 24   |
| Sec13    | 0.69301  | 5.05381  | 5.655159 | 0.017404094 | 1        | 97  | 122 | 30  | 88  | 68  | 86  | 288  |
| Ppp1cb   | 0.69135  | 6.605714 | 8.634378 | 0.003298779 | 1        | 325 | 467 | 211 | 386 | 343 | 282 | 1261 |
| 1190002N | 0.683157 | 4.260906 | 6.631865 | 0.010017032 | 1        | 26  | 27  | 17  | 19  | 35  | 20  | 57   |
| Cry2     | 0.683066 | 5.084101 | 7.601412 | 0.005832262 | 1        | 27  | 53  | 54  | 63  | 57  | 70  | 121  |
| Dus3l    | 0.682072 | 4.088797 | 5.119173 | 0.023662893 | 1        | 10  | 29  | 33  | 34  | 30  | 35  | 70   |
| Tmed4    | 0.678988 | 5.096216 | 7.965825 | 0.004766876 | 1        | 63  | 82  | 40  | 63  | 78  | 76  | 154  |
| Tmem9b   | 0.676494 | 6.013565 | 13.22452 | 0.000276311 | 0.509334 | 102 | 197 | 89  | 174 | 132 | 154 | 429  |
| Dnase1l1 | 0.675046 | 3.306054 | 4.239651 | 0.039490279 | 1        | 31  | 57  | 16  | 28  | 35  | 33  | 98   |
| Pnp      | 0.67349  | 6.182599 | 8.684504 | 0.003209269 | 1        | 332 | 624 | 176 | 353 | 537 | 285 | 1021 |
| Ptprg    | 0.671251 | 5.348863 | 15.19753 | 9.683E-05   | 0.302172 | 74  | 139 | 81  | 113 | 113 | 112 | 289  |
| Fam212b  | 0.669744 | 4.595499 | 6.421811 | 0.011272713 | 1        | 15  | 20  | 10  | 25  | 24  | 22  | 39   |
| Pkia     | 0.668515 | 5.483327 | 6.038306 | 0.013998711 | 1        | 9   | 12  | 16  | 27  | 25  | 19  | 34   |
| Uba2     | 0.666726 | 5.272134 | 7.299454 | 0.006897556 | 1        | 98  | 174 | 52  | 132 | 128 | 95  | 353  |
| Hs1bp3   | 0.665304 | 3.835239 | 4.088001 | 0.04318869  | 1        | 50  | 43  | 39  | 57  | 63  | 38  | 150  |
| Dusp1    | 0.665225 | 4.488691 | 4.223672 | 0.039863804 | 1        | 101 | 132 | 39  | 79  | 164 | 46  | 226  |
| Zdhhc2   | 0.655737 | 7.747822 | 4.592577 | 0.032110698 | 1        | 7   | 15  | 5   | 19  | 14  | 8   | 34   |
| Rmdn2    | 0.655701 | 3.719083 | 3.93835  | 0.047197042 | 1        | 9   | 9   | 10  | 20  | 15  | 8   | 37   |
| Dnaja3   | 0.651123 | 4.271631 | 5.662376 | 0.017332626 | 1        | 42  | 78  | 32  | 50  | 64  | 53  | 129  |
| Rarres1  | 0.650298 | 4.81164  | 5.351376 | 0.020705926 | 1        | 28  | 32  | 17  | 29  | 43  | 31  | 52   |
| Sdhc     | 0.650291 | 5.647094 | 11.57408 | 0.000668776 | 0.632525 | 67  | 89  | 47  | 93  | 93  | 62  | 216  |
| Appbp2   | 0.648186 | 4.807111 | 7.315369 | 0.006836737 | 1        | 70  | 117 | 63  | 96  | 114 | 75  | 245  |
| Oard1    | 0.647204 | 3.959574 | 9.178126 | 0.001824505 | 0.937691 | 61  | 57  | 36  | 60  | 78  | 68  | 110  |
| Mfn1     | 0.646542 | 5.125044 | 16.17421 | 5.77753E-05 | 0.230947 | 77  | 118 | 54  | 106 | 127 | 81  | 223  |
| Bin3     | 0.644705 | 3.29124  | 4.36749  | 0.036630914 | 1        | 22  | 42  | 17  | 28  | 31  | 39  | 58   |
| Pxylp1   | 0.642384 | 4.107915 | 4.233095 | 0.039643082 | 1        | 78  | 93  | 51  | 72  | 66  | 82  | 229  |
| Psma5    | 0.63805  | 5.202508 | 7.135654 | 0.007556608 | 1        | 69  | 99  | 35  | 92  | 88  | 77  | 190  |
| Psmb3    | 0.63439  | 7.012351 | 5.386381 | 0.020294515 | 1        | 195 | 365 | 211 | 375 | 233 | 237 | 1041 |
| Mzt1     | 0.628622 | 3.552345 | 4.887192 | 0.027056659 | 1        | 23  | 38  | 13  | 34  | 27  | 22  | 84   |
| Tdrp     | 0.626582 | 3.793607 | 5.3142   | 0.021152307 | 1        | 27  | 41  | 22  | 48  | 58  | 25  | 82   |
| Cct4     | 0.622865 | 6.102901 | 7.233703 | 0.007154747 | 1        | 196 | 274 | 126 | 274 | 238 | 181 | 672  |
| Nfs1     | 0.621898 | 4.077508 | 5.046765 | 0.02467196  | 1        | 25  | 66  | 30  | 63  | 64  | 40  | 114  |
| Tbc1d14  | 0.621788 | 4.082381 | 7.502638 | 0.00616087  | 1        | 57  | 75  | 32  | 47  | 64  | 68  | 116  |
| Zfp141   | 0.620152 | 2.99654  | 4.230816 | 0.039696352 | 1        | 29  | 33  | 15  | 19  | 28  | 24  | 65   |
| Mtx2     | 0.619201 | 4.565987 | 7.237771 | 0.007138554 | 1        | 50  | 92  | 44  | 66  | 73  | 59  | 175  |
| Esrra    | 0.616926 | 4.152027 | 5.615373 | 0.017803594 | 1        | 47  | 86  | 42  | 91  | 72  | 75  | 169  |
| Pthrhd1  | 0.614063 | 3.975123 | 4.987576 | 0.025529954 | 1        | 16  | 34  | 21  | 31  | 31  | 28  | 62   |
| Hdac11   | 0.606785 | 5.022128 | 6.11249  | 0.013422992 | 1        | 12  | 19  | 23  | 40  | 34  | 26  | 50   |
| Wtip     | 0.60617  | 3.879157 | 5.20444  | 0.022529274 | 1        | 60  | 45  | 29  | 47  | 44  | 48  | 133  |
| Yod1     | 0.604726 | 3.950145 | 4.362222 | 0.036744358 | 1        | 33  | 65  | 37  | 69  | 36  | 45  | 177  |
| Vhl      | 0.599194 | 4.177006 | 4.466059 | 0.034574655 | 1        | 32  | 73  | 42  | 82  | 76  | 60  | 129  |
| Cln5     | 0.597608 | 4.511008 | 6.263452 | 0.012325385 | 1        | 45  | 80  | 36  | 66  | 75  | 72  | 109  |
| Sash1    | 0.596352 | 5.465516 | 12.00684 | 0.000530055 | 0.629451 | 53  | 73  | 45  | 62  | 84  | 58  | 130  |
| Efna1    | 0.593056 | 4.575163 | 4.827704 | 0.028005909 | 1        | 77  | 92  | 41  | 123 | 76  | 73  | 259  |
| Pmp22    | 0.591192 | 10.03476 | 7.417894 | 0.006457835 | 1        | 56  | 104 | 57  | 50  | 63  | 65  | 199  |
| Nubp2    | 0.590401 | 4.734688 | 6.637468 | 0.00985578  | 1        | 43  | 54  | 24  | 58  | 53  | 44  | 113  |
| Sec14l1  | 0.589505 | 5.019232 | 8.530874 | 0.00349172  | 1        | 40  | 80  | 45  | 86  | 83  | 66  | 140  |
| Tppp3    | 0.585622 | 9.779929 | 9.496583 | 0.002058549 | 0.987445 | 62  | 101 | 46  | 132 | 109 | 104 | 168  |
| Peg13    | 0.585394 | 6.360433 | 4.627168 | 0.031469474 | 1        | 15  | 13  | 17  | 25  | 37  | 15  | 28   |
| Cirh1a   | 0.585353 | 4.210785 | 5.002358 | 0.025312815 | 1        | 51  | 60  | 42  | 81  | 70  | 66  | 138  |
| Notch2   | 0.577907 | 5.103559 | 6.534264 | 0.010581601 | 1        | 137 | 147 | 78  | 168 | 136 | 141 | 353  |
| Rasa3    | 0.577108 | 4.081705 | 4.371166 | 0.036551972 | 1        | 25  | 45  | 19  | 19  | 35  | 31  | 57   |
| Gas2l1   | 0.574035 | 4.816108 | 5.947944 | 0.014734459 | 1        | 60  | 65  | 34  | 54  | 74  | 52  | 121  |
| Slc36a1  | 0.570858 | 6.833301 | 5.659741 | 0.017358684 | 1        | 23  | 31  | 24  | 13  | 27  | 16  | 64   |
| Card19   | 0.570793 | 6.016134 | 6.66936  | 0.009808443 | 1        | 180 | 249 | 109 | 227 | 228 | 159 | 520  |

|            |          |          |          |             |          |      |      |      |      |      |      |      |
|------------|----------|----------|----------|-------------|----------|------|------|------|------|------|------|------|
| Dcun1d5    | 0.568193 | 5.399288 | 10.53026 | 0.001174355 | 0.75068  | 107  | 149  | 75   | 136  | 137  | 121  | 282  |
| Nip7       | 0.56774  | 4.073709 | 4.604596 | 0.031886359 | 1        | 37   | 58   | 39   | 66   | 68   | 55   | 104  |
| Taf5l      | 0.566047 | 4.378501 | 6.544977 | 0.01051807  | 1        | 65   | 103  | 55   | 101  | 89   | 84   | 203  |
| Rbp1       | 0.564892 | 6.226507 | 6.244511 | 0.012457875 | 1        | 272  | 537  | 183  | 295  | 328  | 272  | 924  |
| Gnai3      | 0.562814 | 5.516361 | 7.065488 | 0.007858292 | 1        | 184  | 330  | 149  | 243  | 227  | 231  | 602  |
| Tpp1       | 0.562464 | 5.910603 | 11.10389 | 0.000861467 | 0.679882 | 185  | 244  | 121  | 224  | 233  | 155  | 531  |
| Cbfb       | 0.55779  | 6.509976 | 6.864915 | 0.008790444 | 1        | 116  | 150  | 84   | 125  | 124  | 105  | 342  |
| Hes1       | 0.552941 | 7.753112 | 8.201101 | 0.004186498 | 1        | 1023 | 1560 | 703  | 1337 | 1326 | 1097 | 2916 |
| Aco2       | 0.552437 | 5.217303 | 5.426073 | 0.01983824  | 1        | 64   | 79   | 48   | 70   | 72   | 68   | 164  |
| Apex1      | 0.546307 | 4.717414 | 7.298622 | 0.006900752 | 1        | 66   | 107  | 49   | 75   | 69   | 91   | 176  |
| Mcc        | 0.542328 | 3.662587 | 4.658824 | 0.030894339 | 1        | 51   | 82   | 35   | 47   | 68   | 57   | 115  |
| Cfap20     | 0.541337 | 4.518032 | 5.68847  | 0.017076737 | 1        | 59   | 60   | 36   | 80   | 65   | 54   | 153  |
| Mpv17      | 0.539437 | 5.615272 | 11.75874 | 0.000605581 | 0.632525 | 75   | 117  | 63   | 125  | 111  | 97   | 219  |
| Arnt       | 0.538576 | 4.592783 | 5.102395 | 0.023892834 | 1        | 114  | 122  | 70   | 78   | 99   | 88   | 273  |
| Pdcd6      | 0.532905 | 5.892531 | 8.927656 | 0.002808846 | 1        | 176  | 314  | 159  | 275  | 231  | 225  | 606  |
| Seh1l      | 0.532326 | 4.30801  | 4.692155 | 0.03030063  | 1        | 81   | 94   | 40   | 60   | 83   | 57   | 178  |
| 1110051M   | 0.527644 | 5.212519 | 4.376194 | 0.036444284 | 1        | 24   | 17   | 15   | 34   | 25   | 36   | 37   |
| Znhit2     | 0.526667 | 4.733295 | 6.396318 | 0.011435728 | 1        | 41   | 66   | 44   | 90   | 72   | 60   | 137  |
| Pdhb       | 0.52588  | 5.955593 | 5.762441 | 0.016372315 | 1        | 88   | 143  | 51   | 124  | 93   | 117  | 238  |
| Uck1l      | 0.525014 | 4.490461 | 4.001796 | 0.045451799 | 1        | 63   | 151  | 52   | 103  | 78   | 91   | 247  |
| Fbxo4      | 0.52349  | 4.673573 | 4.968234 | 0.025816988 | 1        | 98   | 104  | 101  | 94   | 101  | 100  | 276  |
| Wfdc2      | 0.522775 | 5.527928 | 6.615338 | 0.010110415 | 1        | 235  | 357  | 125  | 333  | 362  | 218  | 566  |
| Fzd6       | 0.521218 | 5.444109 | 5.004159 | 0.025286481 | 1        | 217  | 308  | 168  | 305  | 234  | 228  | 705  |
| Ctps       | 0.519699 | 4.375658 | 3.993394 | 0.045678972 | 1        | 41   | 71   | 34   | 47   | 54   | 50   | 111  |
| Ak1        | 0.519288 | 5.87956  | 5.787069 | 0.016144482 | 1        | 54   | 111  | 37   | 56   | 83   | 63   | 134  |
| lqcb1      | 0.516427 | 4.073414 | 4.199433 | 0.040437509 | 1        | 30   | 52   | 38   | 55   | 48   | 57   | 86   |
| Dgcr2      | 0.515802 | 5.443384 | 7.564705 | 0.00595224  | 1        | 114  | 172  | 93   | 200  | 149  | 139  | 365  |
| G3bp1      | 0.513917 | 7.536123 | 16.88812 | 3.9649E-05  | 0.203773 | 699  | 1196 | 542  | 999  | 886  | 849  | 2112 |
| Pitx2      | 0.509343 | 3.989668 | 7.580369 | 0.005900736 | 1        | 87   | 109  | 66   | 106  | 107  | 95   | 207  |
| Cyth1      | 0.508675 | 4.90596  | 5.096448 | 0.023974887 | 1        | 93   | 146  | 51   | 133  | 120  | 101  | 240  |
| Gabaraapl2 | 0.507126 | 6.068137 | 4.385304 | 0.036250029 | 1        | 69   | 111  | 60   | 119  | 84   | 50   | 295  |
| Klhl12     | 0.506696 | 4.526038 | 4.886647 | 0.027065202 | 1        | 40   | 77   | 41   | 62   | 47   | 50   | 154  |
| Aacs       | 0.506236 | 5.680819 | 7.200983 | 0.007286368 | 1        | 169  | 224  | 133  | 152  | 192  | 147  | 444  |
| Cx3cl1     | 0.504743 | 4.23381  | 5.456129 | 0.019499804 | 1        | 73   | 81   | 47   | 106  | 79   | 79   | 184  |
| Anxa7      | 0.503123 | 6.881612 | 7.666478 | 0.005625616 | 1        | 338  | 575  | 299  | 467  | 357  | 385  | 1206 |
| Tomm20     | 0.502438 | 5.535423 | 6.323953 | 0.011911779 | 1        | 58   | 57   | 49   | 71   | 83   | 52   | 126  |
| Trex2      | 0.501035 | 4.823577 | 5.417413 | 0.019936878 | 1        | 106  | 223  | 101  | 173  | 172  | 135  | 358  |
| Gprc5c     | 0.500021 | 5.2471   | 3.905372 | 0.048131979 | 1        | 35   | 52   | 25   | 32   | 41   | 56   | 53   |
| Rac1       | 0.498464 | 8.117123 | 9.921526 | 0.001633569 | 0.88998  | 761  | 1225 | 644  | 1106 | 1075 | 751  | 2414 |
| Anxa3      | 0.497979 | 4.04637  | 4.189782 | 0.040668331 | 1        | 66   | 113  | 73   | 85   | 124  | 64   | 188  |
| Eef1akmt1  | 0.496836 | 4.416637 | 4.367013 | 0.036641163 | 1        | 55   | 50   | 31   | 73   | 56   | 52   | 124  |
| AW54987    | 0.49412  | 4.832544 | 4.186188 | 0.040754646 | 1        | 69   | 122  | 59   | 109  | 101  | 98   | 186  |
| 4833420G   | 0.492252 | 4.529903 | 4.00656  | 0.045323547 | 1        | 79   | 94   | 38   | 74   | 88   | 64   | 160  |
| Kdelr2     | 0.4893   | 5.674421 | 3.962209 | 0.046532598 | 1        | 172  | 248  | 110  | 141  | 166  | 142  | 460  |
| Limk1      | 0.488633 | 6.666855 | 4.552342 | 0.032873743 | 1        | 13   | 40   | 25   | 31   | 38   | 20   | 60   |
| Mmadhc     | 0.487065 | 6.072032 | 5.009563 | 0.025207666 | 1        | 217  | 315  | 168  | 284  | 210  | 206  | 726  |
| Rtn1       | 0.484575 | 9.020087 | 4.434603 | 0.03521741  | 1        | 23   | 30   | 23   | 38   | 31   | 40   | 50   |
| Cul2       | 0.484417 | 5.084036 | 5.518943 | 0.018811617 | 1        | 60   | 62   | 53   | 75   | 67   | 85   | 116  |
| Sertad1    | 0.48437  | 5.106047 | 8.932128 | 0.002801977 | 1        | 113  | 158  | 76   | 192  | 154  | 142  | 278  |
| Vps29      | 0.482942 | 5.892887 | 4.317246 | 0.037727936 | 1        | 113  | 159  | 99   | 107  | 114  | 101  | 340  |
| Fundc1     | 0.481889 | 5.865674 | 7.035769 | 0.007989756 | 1        | 112  | 107  | 74   | 116  | 116  | 95   | 245  |
| 4930453N   | 0.480606 | 5.162608 | 6.855438 | 0.008837187 | 1        | 136  | 173  | 83   | 199  | 174  | 136  | 329  |
| Znrd1      | 0.479766 | 4.488576 | 4.066225 | 0.043748954 | 1        | 52   | 91   | 71   | 96   | 89   | 64   | 196  |
| Fth1       | 0.47965  | 10.45482 | 5.407726 | 0.020047819 | 1        | 2461 | 3659 | 1984 | 2726 | 2633 | 1972 | 8113 |
| Sowahb     | 0.47809  | 4.212724 | 6.446624 | 0.011116336 | 1        | 91   | 127  | 81   | 133  | 134  | 107  | 225  |
| Derl2      | 0.47744  | 4.881065 | 4.524174 | 0.033419199 | 1        | 103  | 126  | 54   | 105  | 127  | 66   | 236  |
| Bloc1s4    | 0.473351 | 4.29503  | 5.544392 | 0.01854     | 1        | 67   | 100  | 33   | 75   | 81   | 77   | 128  |
| Gna14      | 0.472069 | 4.955451 | 5.775292 | 0.016253018 | 1        | 41   | 55   | 45   | 78   | 92   | 53   | 83   |
| Agps       | 0.471887 | 5.073022 | 4.511272 | 0.033672197 | 1        | 121  | 159  | 65   | 140  | 133  | 116  | 273  |
| Mrpl3      | 0.470619 | 4.868666 | 4.149258 | 0.041652779 | 1        | 87   | 97   | 50   | 102  | 84   | 79   | 207  |
| Stx3       | 0.469752 | 5.012492 | 5.099406 | 0.023934043 | 1        | 138  | 170  | 95   | 196  | 151  | 164  | 329  |
| ldh1       | 0.468406 | 6.195179 | 5.208982 | 0.022470485 | 1        | 194  | 302  | 150  | 228  | 246  | 154  | 584  |
| Sema4a     | 0.468249 | 5.95613  | 6.356405 | 0.011695831 | 1        | 271  | 408  | 219  | 363  | 311  | 272  | 828  |
| Arf4       | 0.467742 | 6.187378 | 5.797137 | 0.016052291 | 1        | 235  | 351  | 204  | 363  | 292  | 240  | 760  |
| Ptk2       | 0.467044 | 4.564646 | 4.096489 | 0.042972369 | 1        | 64   | 101  | 39   | 55   | 63   | 68   | 147  |
| Psat1      | 0.465838 | 5.576929 | 6.161963 | 0.013052625 | 1        | 132  | 256  | 115  | 180  | 197  | 130  | 420  |
| Asb13      | 0.464417 | 5.254514 | 6.545988 | 0.010512092 | 1        | 46   | 64   | 57   | 78   | 64   | 72   | 126  |
| Socs2      | 0.462725 | 5.207952 | 4.2522   | 0.039199515 | 1        | 22   | 41   | 28   | 42   | 40   | 33   | 68   |
| Cipltm1l   | 0.462398 | 5.894919 | 5.109805 | 0.023790996 | 1        | 199  | 251  | 150  | 206  | 204  | 136  | 594  |
| Arfrp1     | 0.457885 | 5.225223 | 6.593036 | 0.010237841 | 1        | 110  | 108  | 63   | 152  | 142  | 91   | 229  |
| Ttc9       | 0.451099 | 6.289359 | 5.875203 | 0.015355606 | 1        | 134  | 162  | 82   | 155  | 146  | 159  | 246  |
| Rpa1       | 0.450154 | 5.413764 | 4.488558 | 0.034122447 | 1        | 104  | 142  | 81   | 132  | 106  | 92   | 315  |
| Tsc1       | 0.449295 | 4.893901 | 4.558431 | 0.032757078 | 1        | 51   | 82   | 32   | 68   | 63   | 59   | 121  |
| Trappc12   | 0.448823 | 5.03566  | 5.151551 | 0.023225624 | 1        | 70   | 87   | 66   | 96   | 79   | 96   | 163  |

|           |          |          |          |             |   |      |      |      |      |      |      |      |
|-----------|----------|----------|----------|-------------|---|------|------|------|------|------|------|------|
| Ube2e2    | 0.44668  | 4.890207 | 4.206762 | 0.040263136 | 1 | 89   | 109  | 62   | 97   | 83   | 104  | 192  |
| Cnot8     | 0.446298 | 4.853867 | 4.882696 | 0.027127225 | 1 | 48   | 95   | 32   | 99   | 75   | 68   | 138  |
| Msrb1     | 0.444322 | 5.62259  | 8.453438 | 0.003643541 | 1 | 90   | 119  | 64   | 90   | 90   | 104  | 187  |
| Mta1      | 0.444201 | 5.405769 | 5.590031 | 0.01806298  | 1 | 142  | 194  | 90   | 126  | 159  | 126  | 303  |
| Cant1     | 0.442083 | 5.224731 | 4.579405 | 0.032358456 | 1 | 82   | 165  | 67   | 105  | 95   | 103  | 246  |
| Elavl1    | 0.441214 | 5.181866 | 5.319116 | 0.021092712 | 1 | 140  | 203  | 89   | 163  | 160  | 145  | 320  |
| Sec23b    | 0.440487 | 5.023886 | 4.812251 | 0.028258116 | 1 | 87   | 142  | 62   | 114  | 127  | 87   | 208  |
| Gtmp      | 0.437709 | 4.963958 | 5.364778 | 0.020547409 | 1 | 92   | 106  | 78   | 109  | 104  | 104  | 200  |
| Rnpepl1   | 0.436304 | 4.816586 | 4.346196 | 0.0370917   | 1 | 96   | 171  | 96   | 166  | 130  | 142  | 281  |
| Jade1     | 0.436167 | 5.374691 | 5.68742  | 0.017086957 | 1 | 130  | 164  | 121  | 189  | 159  | 149  | 340  |
| Cnep1r1   | 0.435756 | 4.765483 | 4.162918 | 0.041318172 | 1 | 55   | 106  | 39   | 76   | 63   | 73   | 150  |
| Pcx       | 0.434268 | 4.725673 | 4.274146 | 0.038696404 | 1 | 75   | 109  | 50   | 83   | 66   | 77   | 197  |
| Txndc12   | 0.432393 | 5.128982 | 5.543725 | 0.018547068 | 1 | 158  | 157  | 84   | 171  | 179  | 145  | 263  |
| Ndufa8    | 0.431757 | 6.607461 | 5.503009 | 0.018983775 | 1 | 195  | 296  | 187  | 280  | 236  | 193  | 627  |
| Sec22c    | 0.431136 | 5.049272 | 5.000164 | 0.025344923 | 1 | 57   | 84   | 48   | 84   | 75   | 82   | 121  |
| Xlrfc     | 0.430775 | 5.092478 | 6.635754 | 0.009995186 | 1 | 156  | 284  | 145  | 219  | 224  | 190  | 426  |
| Dazap2    | 0.429379 | 7.388363 | 8.501478 | 0.003548581 | 1 | 593  | 939  | 479  | 768  | 706  | 566  | 1743 |
| Wfs1      | 0.429129 | 6.422561 | 7.601041 | 0.00583346  | 1 | 369  | 606  | 306  | 433  | 451  | 425  | 924  |
| Rhot1     | 0.428941 | 5.592336 | 4.445111 | 0.035001316 | 1 | 61   | 72   | 34   | 61   | 75   | 52   | 108  |
| Id1       | 0.42837  | 5.516252 | 3.950714 | 0.046851477 | 1 | 155  | 195  | 116  | 233  | 239  | 158  | 319  |
| Cryab     | 0.428175 | 8.141059 | 6.384975 | 0.011509039 | 1 | 410  | 543  | 356  | 566  | 487  | 374  | 1203 |
| Apmap     | 0.427298 | 4.590947 | 3.94975  | 0.046878328 | 1 | 47   | 68   | 33   | 68   | 53   | 68   | 107  |
| Nme1      | 0.426828 | 7.222221 | 6.991727 | 0.008188731 | 1 | 150  | 222  | 87   | 229  | 202  | 137  | 375  |
| Anxa1     | 0.426774 | 7.461816 | 4.48147  | 0.034264229 | 1 | 1032 | 1552 | 606  | 1148 | 1396 | 1137 | 1741 |
| Rfc2      | 0.426407 | 4.903965 | 5.475616 | 0.019283564 | 1 | 100  | 129  | 52   | 121  | 106  | 113  | 189  |
| Marveld2  | 0.42582  | 4.263142 | 4.085434 | 0.043254352 | 1 | 102  | 125  | 64   | 112  | 93   | 112  | 216  |
| Hs2st1    | 0.425641 | 4.490859 | 3.907629 | 0.048067372 | 1 | 41   | 54   | 34   | 41   | 42   | 62   | 68   |
| Golph3l   | 0.4255   | 4.523199 | 3.914976 | 0.047857685 | 1 | 78   | 102  | 61   | 60   | 70   | 84   | 165  |
| Ankrd46   | 0.424453 | 6.530503 | 4.214981 | 0.040068517 | 1 | 70   | 119  | 38   | 79   | 94   | 44   | 185  |
| Abi2      | 0.424348 | 5.944114 | 3.973883 | 0.046211089 | 1 | 72   | 89   | 38   | 63   | 68   | 65   | 140  |
| Asb8      | 0.421948 | 5.666526 | 5.813909 | 0.015899917 | 1 | 113  | 177  | 86   | 154  | 130  | 126  | 299  |
| Polr2g    | 0.421895 | 5.461968 | 5.372684 | 0.020454482 | 1 | 67   | 101  | 55   | 126  | 86   | 96   | 175  |
| 2410004B: | 0.421185 | 4.563457 | 4.171436 | 0.041110943 | 1 | 51   | 80   | 39   | 72   | 70   | 54   | 126  |
| Lgmn      | 0.421015 | 6.28211  | 4.930482 | 0.026386954 | 1 | 90   | 149  | 92   | 182  | 128  | 92   | 335  |
| Uap1      | 0.418383 | 5.362642 | 3.863075 | 0.049359787 | 1 | 125  | 178  | 86   | 149  | 101  | 122  | 361  |
| Tap1      | 0.417561 | 4.87601  | 3.937445 | 0.047222444 | 1 | 72   | 103  | 56   | 84   | 82   | 78   | 168  |
| Polr1d    | 0.417292 | 6.643758 | 4.080564 | 0.043379185 | 1 | 411  | 540  | 305  | 591  | 451  | 348  | 1221 |
| Slc45a4   | 0.411686 | 5.28085  | 4.416609 | 0.035590706 | 1 | 57   | 58   | 37   | 102  | 70   | 69   | 118  |
| Cyth2     | 0.411307 | 5.479695 | 6.001082 | 0.014297105 | 1 | 87   | 139  | 81   | 112  | 127  | 114  | 181  |
| Tecpr1    | 0.409438 | 5.567305 | 5.059286 | 0.024494333 | 1 | 44   | 66   | 60   | 61   | 64   | 60   | 115  |
| Rab33b    | 0.40903  | 4.814843 | 4.278226 | 0.038603622 | 1 | 58   | 74   | 47   | 45   | 62   | 64   | 103  |
| Tfam      | 0.408428 | 4.845419 | 5.73049  | 0.016672829 | 1 | 106  | 115  | 54   | 105  | 112  | 82   | 198  |
| Cyb5a     | 0.405322 | 6.096793 | 4.060847 | 0.043888473 | 1 | 217  | 266  | 160  | 272  | 237  | 191  | 548  |
| Trib2     | 0.405016 | 6.677058 | 4.433196 | 0.035246451 | 1 | 108  | 81   | 60   | 76   | 73   | 83   | 191  |
| Cnpy2     | 0.404781 | 5.295378 | 4.198875 | 0.040450801 | 1 | 143  | 176  | 95   | 156  | 170  | 132  | 283  |
| Id2       | 0.40442  | 8.839623 | 6.234584 | 0.012527901 | 1 | 1966 | 3286 | 1596 | 2772 | 2184 | 1785 | 6475 |
| Prkab1    | 0.403685 | 5.150107 | 5.93679  | 0.014828004 | 1 | 155  | 223  | 165  | 229  | 225  | 173  | 409  |
| Lgalsl    | 0.402699 | 5.45172  | 4.475485 | 0.034384445 | 1 | 155  | 330  | 160  | 269  | 197  | 205  | 557  |
| Gm2a      | 0.402359 | 5.737459 | 4.128761 | 0.04216021  | 1 | 107  | 156  | 171  | 214  | 223  | 97   | 386  |
| Lamtor4   | 0.400182 | 6.339943 | 6.941434 | 0.008422159 | 1 | 189  | 267  | 122  | 276  | 243  | 188  | 436  |
| Golph3    | 0.398517 | 7.022396 | 7.867307 | 0.005033656 | 1 | 471  | 773  | 413  | 687  | 581  | 573  | 1257 |
| Cnst      | 0.394298 | 6.031513 | 5.639656 | 0.017558652 | 1 | 81   | 98   | 59   | 74   | 82   | 73   | 166  |
| Efhd2     | 0.392787 | 4.999869 | 4.643873 | 0.031164589 | 1 | 135  | 179  | 110  | 202  | 170  | 141  | 333  |
| Man1b1    | 0.391852 | 5.54013  | 4.890904 | 0.026998545 | 1 | 131  | 167  | 90   | 174  | 188  | 118  | 258  |
| Arcp5     | 0.390489 | 7.294336 | 4.642007 | 0.031198493 | 1 | 494  | 815  | 416  | 689  | 595  | 470  | 1487 |
| Fam195b   | 0.390024 | 5.77742  | 4.86009  | 0.027484907 | 1 | 78   | 142  | 90   | 155  | 129  | 93   | 257  |
| Cldn23    | 0.389105 | 5.518099 | 5.176399 | 0.022895724 | 1 | 289  | 403  | 181  | 308  | 304  | 264  | 645  |
| Cyp2s1    | 0.387412 | 3.923612 | 4.38887  | 0.036174273 | 1 | 85   | 115  | 69   | 120  | 114  | 97   | 178  |
| Mrpl45    | 0.387366 | 5.419803 | 4.492984 | 0.034034219 | 1 | 72   | 121  | 64   | 107  | 94   | 75   | 205  |
| Srsf6     | 0.386463 | 6.587195 | 6.51113  | 0.010720134 | 1 | 393  | 529  | 258  | 464  | 420  | 397  | 853  |
| Prkaca    | 0.383902 | 6.999078 | 4.196921 | 0.040497441 | 1 | 130  | 227  | 146  | 185  | 154  | 156  | 414  |
| Oat       | 0.382193 | 7.191508 | 6.447082 | 0.011113471 | 1 | 656  | 924  | 500  | 842  | 773  | 625  | 1619 |
| Degs1     | 0.379546 | 6.935045 | 7.891319 | 0.004967264 | 1 | 130  | 211  | 102  | 170  | 185  | 140  | 283  |
| Adprh     | 0.378042 | 6.308532 | 4.415565 | 0.035612475 | 1 | 93   | 144  | 76   | 128  | 113  | 94   | 243  |
| Map2k1    | 0.377261 | 5.738861 | 4.747782 | 0.02933608  | 1 | 180  | 246  | 151  | 222  | 213  | 211  | 376  |
| Ythdf2    | 0.376702 | 6.418754 | 4.544889 | 0.033017154 | 1 | 265  | 388  | 229  | 374  | 301  | 251  | 769  |
| Glyr1     | 0.376088 | 6.286558 | 7.720209 | 0.005460607 | 1 | 186  | 322  | 174  | 219  | 265  | 211  | 423  |
| Rab40c    | 0.375043 | 5.453221 | 4.666546 | 0.030755721 | 1 | 127  | 226  | 118  | 180  | 166  | 139  | 359  |
| Gpx8      | 0.374735 | 4.621219 | 3.943478 | 0.047053406 | 1 | 70   | 73   | 59   | 108  | 104  | 90   | 105  |
| Prdx1     | 0.374718 | 7.718587 | 5.873533 | 0.015370178 | 1 | 673  | 966  | 466  | 915  | 654  | 636  | 1860 |
| Zfp185    | 0.374053 | 6.981554 | 7.319146 | 0.006822383 | 1 | 647  | 997  | 494  | 751  | 698  | 648  | 1620 |
| Alkbh8    | 0.373469 | 5.195991 | 4.372865 | 0.036515542 | 1 | 84   | 113  | 66   | 110  | 123  | 84   | 161  |
| Prkcd     | 0.371026 | 6.371449 | 4.590021 | 0.032158615 | 1 | 188  | 278  | 178  | 286  | 249  | 179  | 537  |
| Gstm1     | 0.370989 | 5.473223 | 4.64574  | 0.03113072  | 1 | 134  | 214  | 122  | 223  | 226  | 159  | 290  |

|           |          |          |          |             |   |      |      |      |      |      |      |      |
|-----------|----------|----------|----------|-------------|---|------|------|------|------|------|------|------|
| Sgms2     | 0.368699 | 5.504029 | 4.513919 | 0.033620124 | 1 | 153  | 236  | 133  | 205  | 180  | 151  | 417  |
| Dpp3      | 0.367463 | 6.201457 | 4.130739 | 0.042110959 | 1 | 195  | 391  | 160  | 270  | 240  | 203  | 591  |
| Rchy1     | 0.367436 | 5.605883 | 6.2967   | 0.012096292 | 1 | 168  | 272  | 128  | 229  | 205  | 189  | 397  |
| Dusp3     | 0.366528 | 7.036772 | 5.671138 | 0.01724626  | 1 | 97   | 143  | 77   | 147  | 168  | 108  | 169  |
| Kctd1     | 0.365471 | 4.952394 | 6.065772 | 0.013782647 | 1 | 83   | 139  | 82   | 124  | 134  | 109  | 173  |
| Samd8     | 0.365425 | 6.046384 | 5.345212 | 0.020779258 | 1 | 93   | 150  | 71   | 111  | 119  | 118  | 174  |
| Ier5      | 0.365322 | 7.256974 | 5.090909 | 0.024051583 | 1 | 791  | 960  | 526  | 826  | 644  | 735  | 1853 |
| Vopp1     | 0.364102 | 5.522654 | 5.72893  | 0.016687645 | 1 | 148  | 203  | 103  | 170  | 168  | 138  | 319  |
| Mt2       | 0.356463 | 9.152711 | 4.366903 | 0.036643531 | 1 | 2695 | 4431 | 1976 | 3685 | 3299 | 2631 | 6880 |
| S100a10   | 0.355535 | 9.903885 | 3.981944 | 0.045990458 | 1 | 3584 | 6457 | 2407 | 4389 | 4443 | 3143 | 9277 |
| Strap     | 0.353442 | 6.496282 | 5.809752 | 0.015937542 | 1 | 260  | 339  | 172  | 266  | 263  | 220  | 566  |
| Ctsl      | 0.352974 | 8.936353 | 4.3399   | 0.03722912  | 1 | 1731 | 2346 | 1304 | 2160 | 2062 | 1375 | 4327 |
| 9530068EC | 0.352879 | 6.050662 | 4.390259 | 0.03614483  | 1 | 181  | 255  | 139  | 241  | 214  | 166  | 443  |
| Serpinb5  | 0.352794 | 7.299767 | 4.022165 | 0.044906026 | 1 | 883  | 1317 | 541  | 1068 | 920  | 824  | 2058 |
| Bub3      | 0.352266 | 6.602414 | 5.30775  | 0.021230756 | 1 | 259  | 353  | 222  | 404  | 304  | 262  | 692  |
| Cd164     | 0.35143  | 7.732428 | 5.046398 | 0.024677192 | 1 | 936  | 1397 | 658  | 1241 | 1049 | 920  | 2260 |
| Pqlc1     | 0.350041 | 7.719331 | 8.318566 | 0.003924188 | 1 | 458  | 716  | 315  | 627  | 603  | 412  | 1073 |
| Camsap1   | 0.348582 | 6.02392  | 5.332733 | 0.020928545 | 1 | 134  | 165  | 86   | 172  | 125  | 129  | 302  |
| Arhgap1   | 0.345747 | 6.112594 | 4.64493  | 0.031145415 | 1 | 275  | 351  | 203  | 333  | 269  | 270  | 632  |
| Zfp664    | 0.344621 | 6.575488 | 6.495978 | 0.010811883 | 1 | 185  | 254  | 138  | 237  | 204  | 172  | 437  |
| Ubez2     | 0.344161 | 6.583447 | 4.784382 | 0.028718948 | 1 | 290  | 400  | 231  | 395  | 313  | 270  | 756  |
| Atox1     | 0.340939 | 7.301427 | 6.055826 | 0.01386049  | 1 | 474  | 899  | 448  | 684  | 847  | 544  | 971  |
| Irfg1     | 0.340877 | 6.684132 | 5.694126 | 0.017021792 | 1 | 125  | 199  | 99   | 219  | 183  | 139  | 298  |
| Mreg      | 0.336495 | 6.661494 | 5.292371 | 0.021419044 | 1 | 438  | 690  | 422  | 643  | 557  | 447  | 1207 |
| Auh       | 0.334797 | 5.756313 | 3.932177 | 0.047370575 | 1 | 50   | 80   | 61   | 88   | 85   | 57   | 130  |
| H3f3b     | 0.333261 | 8.262382 | 4.572077 | 0.032497142 | 1 | 1470 | 1989 | 1018 | 1696 | 1542 | 1243 | 3429 |
| Raph1     | 0.332366 | 6.636581 | 5.411903 | 0.019999902 | 1 | 188  | 279  | 182  | 256  | 206  | 186  | 526  |
| Sdcbp     | 0.331847 | 7.278997 | 4.213474 | 0.040104125 | 1 | 282  | 457  | 180  | 362  | 331  | 231  | 705  |
| Snx27     | 0.331208 | 6.866231 | 5.563032 | 0.018343613 | 1 | 198  | 309  | 173  | 251  | 219  | 245  | 438  |
| Rapgef5   | 0.331182 | 6.130051 | 4.404491 | 0.035844421 | 1 | 246  | 279  | 172  | 225  | 230  | 226  | 457  |
| Saraf     | 0.330465 | 7.181279 | 6.342742 | 0.011786256 | 1 | 176  | 283  | 161  | 262  | 226  | 174  | 474  |
| Arf3      | 0.330275 | 7.047052 | 8.537246 | 0.003479517 | 1 | 198  | 302  | 166  | 268  | 219  | 233  | 455  |
| Selt      | 0.330009 | 6.528718 | 4.131689 | 0.042087316 | 1 | 200  | 274  | 130  | 202  | 176  | 187  | 436  |
| Gsn       | 0.329802 | 8.516696 | 4.568526 | 0.032564582 | 1 | 1302 | 2296 | 1186 | 1958 | 1722 | 1286 | 3730 |
| Mbp       | 0.328988 | 10.88539 | 4.936174 | 0.026300185 | 1 | 496  | 656  | 341  | 582  | 576  | 422  | 1044 |
| Rbx1      | 0.328231 | 7.177504 | 5.692013 | 0.017042292 | 1 | 218  | 337  | 211  | 357  | 295  | 206  | 623  |
| Vapa      | 0.327237 | 7.317957 | 6.149194 | 0.013147202 | 1 | 380  | 639  | 385  | 591  | 485  | 441  | 1048 |
| Bag6      | 0.324956 | 6.681055 | 5.983218 | 0.014442629 | 1 | 340  | 443  | 177  | 395  | 368  | 299  | 628  |
| Mgat1     | 0.323543 | 5.277712 | 3.941734 | 0.04710221  | 1 | 102  | 158  | 80   | 192  | 155  | 125  | 219  |
| Trappc4   | 0.322145 | 6.539951 | 5.333257 | 0.02092225  | 1 | 176  | 217  | 114  | 188  | 180  | 153  | 344  |
| Ii17re    | 0.319966 | 5.902536 | 5.193187 | 0.022675591 | 1 | 281  | 398  | 220  | 369  | 313  | 284  | 641  |
| Wsb2      | 0.319826 | 6.344035 | 4.64826  | 0.031085035 | 1 | 175  | 207  | 114  | 252  | 200  | 182  | 329  |
| Dpysl3    | 0.319414 | 8.555654 | 3.988967 | 0.045799122 | 1 | 439  | 414  | 363  | 540  | 704  | 349  | 612  |
| C330006A  | 0.318896 | 6.749733 | 4.373765 | 0.036496276 | 1 | 156  | 228  | 122  | 225  | 207  | 129  | 380  |
| Azin1     | 0.318424 | 6.514475 | 5.806329 | 0.015968593 | 1 | 180  | 260  | 136  | 266  | 197  | 180  | 445  |
| 201011110 | 0.318418 | 5.631222 | 4.649367 | 0.031064992 | 1 | 118  | 175  | 124  | 161  | 147  | 128  | 292  |
| Dcaf7     | 0.316879 | 6.103888 | 4.942696 | 0.026201135 | 1 | 228  | 287  | 153  | 267  | 229  | 230  | 440  |
| Cd81      | 0.315901 | 7.083424 | 5.088518 | 0.024084768 | 1 | 226  | 341  | 205  | 351  | 299  | 228  | 569  |
| Ndufs2    | 0.315259 | 6.842066 | 4.434465 | 0.035220257 | 1 | 241  | 280  | 170  | 343  | 256  | 208  | 557  |
| Mapkapk3  | 0.314252 | 5.805963 | 3.970175 | 0.046312968 | 1 | 270  | 385  | 217  | 347  | 319  | 291  | 557  |
| Ola1      | 0.31345  | 7.115394 | 5.408842 | 0.020034997 | 1 | 354  | 514  | 244  | 426  | 404  | 338  | 733  |
| Brd2      | 0.313204 | 7.74721  | 5.148861 | 0.023261622 | 1 | 478  | 766  | 380  | 592  | 507  | 487  | 1176 |
| Psm2      | 0.313176 | 7.364281 | 4.314272 | 0.037793945 | 1 | 423  | 567  | 295  | 623  | 415  | 407  | 1059 |
| Tgoln1    | 0.312683 | 7.250828 | 6.910085 | 0.008571091 | 1 | 223  | 320  | 174  | 292  | 284  | 198  | 493  |
| Rbbp7     | 0.311273 | 6.4138   | 3.869433 | 0.04917313  | 1 | 231  | 347  | 189  | 325  | 264  | 213  | 601  |
| Map1lc3b  | 0.308899 | 8.254318 | 5.562959 | 0.018344382 | 1 | 358  | 520  | 314  | 582  | 539  | 383  | 750  |
| Cops4     | 0.306642 | 6.059581 | 4.987703 | 0.025528075 | 1 | 155  | 252  | 124  | 210  | 189  | 182  | 326  |
| Hnrnpa0   | 0.304987 | 7.786256 | 6.214201 | 0.012672956 | 1 | 785  | 1156 | 577  | 1081 | 878  | 729  | 1895 |
| Fam129b   | 0.303696 | 6.669919 | 4.152685 | 0.041568553 | 1 | 550  | 700  | 369  | 625  | 563  | 469  | 1155 |
| Hspb1     | 0.303186 | 8.492267 | 4.023477 | 0.044871128 | 1 | 1368 | 2064 | 1329 | 1953 | 1545 | 1383 | 3781 |
| Wbp5      | 0.299143 | 6.925017 | 4.81185  | 0.028264688 | 1 | 221  | 346  | 180  | 345  | 275  | 222  | 550  |
| Ankrd13a  | 0.298886 | 6.205595 | 4.805288 | 0.028372529 | 1 | 324  | 474  | 252  | 432  | 443  | 320  | 623  |
| Spg21     | 0.296522 | 6.583337 | 4.419427 | 0.035531957 | 1 | 441  | 689  | 295  | 556  | 483  | 406  | 1005 |
| Ctsb      | 0.289951 | 8.730476 | 5.075217 | 0.024270238 | 1 | 582  | 920  | 434  | 723  | 694  | 523  | 1321 |
| Fam84a    | 0.287055 | 7.158107 | 4.626561 | 0.031480601 | 1 | 781  | 1244 | 564  | 950  | 900  | 712  | 1753 |
| Med28     | 0.282782 | 6.377434 | 4.673165 | 0.030637424 | 1 | 220  | 342  | 157  | 247  | 265  | 189  | 455  |
| Igsf3     | 0.280669 | 7.370984 | 3.974314 | 0.046199271 | 1 | 482  | 875  | 443  | 637  | 568  | 525  | 1227 |
| Col4a1    | 0.277841 | 6.596407 | 4.223627 | 0.039864866 | 1 | 214  | 319  | 179  | 243  | 286  | 189  | 419  |
| Tacstd2   | 0.277085 | 8.937077 | 3.889423 | 0.04859111  | 1 | 2556 | 3793 | 2055 | 3470 | 2761 | 2507 | 6107 |
| Acat2     | 0.275559 | 6.685171 | 3.93015  | 0.047427713 | 1 | 230  | 391  | 163  | 286  | 262  | 214  | 528  |
| Sypl      | 0.275002 | 7.483564 | 4.2311   | 0.039689705 | 1 | 822  | 1131 | 670  | 1133 | 883  | 764  | 1976 |
| Ube3c     | 0.272835 | 6.032109 | 3.896656 | 0.048382318 | 1 | 114  | 217  | 111  | 203  | 182  | 146  | 286  |
| Tprgl     | 0.271582 | 7.682192 | 5.183424 | 0.022803339 | 1 | 351  | 476  | 312  | 521  | 411  | 376  | 773  |
| Foxo1     | 0.270173 | 6.397819 | 4.082758 | 0.043322885 | 1 | 317  | 438  | 223  | 401  | 333  | 287  | 680  |

|          |          |          |          |             |   |      |      |      |      |      |      |      |
|----------|----------|----------|----------|-------------|---|------|------|------|------|------|------|------|
| Hip1r    | 0.264716 | 6.413314 | 4.759764 | 0.02913254  | 1 | 254  | 429  | 214  | 343  | 349  | 290  | 479  |
| Acaa2    | 0.263632 | 6.440724 | 4.020373 | 0.044953768 | 1 | 262  | 415  | 245  | 300  | 313  | 247  | 596  |
| Prr13    | 0.261678 | 7.645859 | 4.844511 | 0.02773425  | 1 | 559  | 844  | 464  | 777  | 671  | 525  | 1288 |
| Klf7     | 0.259814 | 8.761076 | 4.197128 | 0.040492495 | 1 | 207  | 308  | 162  | 290  | 241  | 233  | 406  |
| Gmfb     | 0.259151 | 7.578692 | 4.201023 | 0.040399598 | 1 | 318  | 422  | 263  | 361  | 313  | 292  | 692  |
| Tex261   | 0.257965 | 6.918742 | 4.387888 | 0.036195128 | 1 | 351  | 498  | 241  | 446  | 388  | 304  | 737  |
| Mtpn     | 0.256363 | 7.190975 | 4.319585 | 0.037676105 | 1 | 406  | 569  | 292  | 495  | 426  | 383  | 825  |
| Cenpb    | 0.255634 | 6.259594 | 4.334522 | 0.037346893 | 1 | 256  | 352  | 211  | 318  | 288  | 246  | 522  |
| Hnrnpk   | 0.255551 | 8.318113 | 7.356632 | 0.006681582 | 1 | 1052 | 1723 | 781  | 1358 | 1203 | 1089 | 2193 |
| Rab3d    | 0.255058 | 7.78717  | 5.005507 | 0.025266806 | 1 | 842  | 1362 | 748  | 1118 | 1076 | 771  | 1970 |
| Paqr8    | 0.252296 | 6.333061 | 4.254979 | 0.039135427 | 1 | 308  | 413  | 264  | 330  | 325  | 308  | 587  |
| Abhd12   | 0.249611 | 7.540435 | 3.938068 | 0.04720495  | 1 | 292  | 370  | 235  | 409  | 290  | 295  | 633  |
| Plekhb2  | 0.247244 | 7.477556 | 4.065946 | 0.043756175 | 1 | 422  | 589  | 367  | 512  | 529  | 413  | 785  |
| Mbn1     | 0.247215 | 7.851061 | 4.049696 | 0.044179303 | 1 | 413  | 691  | 357  | 605  | 456  | 408  | 1075 |
| Tor1aip2 | 0.244001 | 6.711552 | 3.935773 | 0.047269422 | 1 | 444  | 673  | 340  | 624  | 489  | 452  | 964  |
| My12b    | 0.241041 | 7.413594 | 4.158168 | 0.041434204 | 1 | 496  | 809  | 413  | 710  | 639  | 508  | 1049 |
| Ddr1     | 0.239093 | 7.937609 | 4.122182 | 0.042324454 | 1 | 1041 | 1629 | 894  | 1452 | 1196 | 1010 | 2451 |
| Ddx3x    | 0.236071 | 8.532091 | 4.538578 | 0.033139115 | 1 | 1060 | 1690 | 898  | 1423 | 1110 | 1006 | 2638 |
| Cnbp     | 0.233846 | 7.144725 | 4.279823 | 0.03856737  | 1 | 427  | 615  | 380  | 651  | 541  | 408  | 952  |
| Cpe      | 0.230814 | 8.81282  | 4.441878 | 0.035067655 | 1 | 662  | 1072 | 608  | 973  | 874  | 621  | 1546 |
| Ivns1abp | 0.221838 | 7.486647 | 3.958901 | 0.046624124 | 1 | 590  | 877  | 511  | 741  | 759  | 549  | 1136 |
| 2310022B | 0.209668 | 6.762892 | 3.855359 | 0.049587317 | 1 | 375  | 640  | 324  | 518  | 464  | 402  | 772  |
| Cpne3    | 0.201805 | 8.228367 | 4.397879 | 0.035983661 | 1 | 1029 | 1504 | 807  | 1501 | 1155 | 1065 | 2041 |
| Ctnnb1   | 0.189719 | 8.847734 | 5.012473 | 0.025165332 | 1 | 1554 | 2519 | 1209 | 2104 | 1903 | 1514 | 2981 |

| Downregulated genes |           |           |          |             |          |    |    |     |     |   |   |   |
|---------------------|-----------|-----------|----------|-------------|----------|----|----|-----|-----|---|---|---|
| LOC10263            | -5.752825 | -0.055144 | 12.17156 | 0.000485237 | 0.629451 | 7  | 6  | 5   | 3   | 0 | 0 | 0 |
| Gm41222             | -5.367518 | -0.587583 | 7.279046 | 0.006976358 | 1        | 1  | 6  | 6   | 3   | 0 | 0 | 0 |
| Pde6a               | -5.311882 | 0.219871  | 6.183949 | 0.012891428 | 1        | 7  | 3  | 3   | 2   | 0 | 0 | 0 |
| Serpina3n           | -5.304747 | 5.647164  | 33.34957 | 7.69947E-09 | 0.000277 | 24 | 15 | 123 | 350 | 3 | 4 | 2 |
| Drd1                | -5.058286 | 0.6166    | 7.547003 | 0.006010997 | 1        | 4  | 5  | 3   | 1   | 0 | 0 | 0 |
| Al182371            | -4.981802 | -0.154456 | 9.31909  | 0.002267785 | 1        | 2  | 5  | 2   | 4   | 0 | 0 | 0 |
| 4930473A            | -4.943416 | -0.262424 | 5.555953 | 0.018417943 | 1        | 5  | 5  | 2   | 0   | 0 | 0 | 0 |
| Cd84                | -4.904438 | 0.396385  | 10.96995 | 0.000926012 | 0.679882 | 4  | 1  | 1   | 6   | 0 | 0 | 0 |
| Lrtm1               | -4.902627 | -0.440331 | 4.57924  | 0.032361567 | 1        | 4  | 7  | 0   | 2   | 0 | 0 | 0 |
| Gm39423             | -4.894826 | -0.458121 | 6.011277 | 0.014214737 | 1        | 5  | 5  | 1   | 1   | 0 | 0 | 0 |
| LOC10816            | -4.887474 | 0.262441  | 7.244087 | 0.007113489 | 1        | 3  | 6  | 2   | 1   | 0 | 0 | 0 |
| Frmpp4              | -4.881339 | 3.048396  | 12.66546 | 0.000372473 | 0.558336 | 0  | 4  | 1   | 7   | 0 | 0 | 0 |
| Gm32639             | -4.878904 | -0.450055 | 5.230276 | 0.022197007 | 1        | 2  | 4  | 0   | 7   | 0 | 0 | 0 |
| Gm26744             | -4.792023 | 0.149143  | 5.780522 | 0.016204728 | 1        | 2  | 7  | 4   | 0   | 0 | 0 | 0 |
| LOC10263            | -4.791967 | -0.702569 | 4.510063 | 0.033695996 | 1        | 1  | 4  | 5   | 0   | 0 | 0 | 0 |
| Map3k19             | -4.743318 | -0.133753 | 6.676426 | 0.009769632 | 1        | 2  | 1  | 1   | 7   | 0 | 0 | 0 |
| Cfap157             | -4.721722 | -0.273147 | 7.384326 | 0.006579473 | 1        | 5  | 3  | 2   | 0   | 0 | 0 | 0 |
| Sdhaf3              | -4.704416 | 0.087753  | 7.095443 | 0.007728021 | 1        | 3  | 4  | 0   | 4   | 0 | 0 | 0 |
| Irx3os              | -4.679219 | -0.621751 | 6.311987 | 0.01199244  | 1        | 1  | 6  | 1   | 3   | 0 | 0 | 0 |
| Gm40126             | -4.67537  | -0.167668 | 6.754036 | 0.009353585 | 1        | 0  | 4  | 1   | 6   | 0 | 0 | 0 |
| Gm30116             | -4.665929 | 1.235155  | 8.616741 | 0.003330873 | 1        | 0  | 0  | 3   | 7   | 0 | 0 | 0 |
| Pcdhgc3             | -4.650776 | -0.447899 | 5.141202 | 0.023364464 | 1        | 2  | 2  | 4   | 1   | 0 | 0 | 0 |
| Stxbp5l             | -4.646476 | 4.572881  | 11.14538 | 0.000842411 | 0.679882 | 2  | 2  | 1   | 5   | 0 | 0 | 0 |
| Crygb               | -4.601072 | 3.733414  | 6.336136 | 0.011830231 | 1        | 0  | 4  | 4   | 40  | 1 | 0 | 0 |
| Tmprss5             | -4.59678  | 2.560525  | 10.18349 | 0.001417034 | 0.864055 | 0  | 10 | 0   | 0   | 0 | 0 | 0 |
| Gm31893             | -4.589278 | -0.576155 | 5.470957 | 0.019335037 | 1        | 1  | 1  | 1   | 7   | 0 | 0 | 0 |
| Gm38822             | -4.562104 | -0.63901  | 6.062341 | 0.013809451 | 1        | 2  | 2  | 0   | 6   | 0 | 0 | 0 |
| Gm35639             | -4.560615 | -0.776069 | 4.93786  | 0.026274545 | 1        | 0  | 7  | 2   | 1   | 0 | 0 | 0 |
| Tcam1               | -4.531186 | -0.082885 | 6.434604 | 0.011191809 | 1        | 4  | 2  | 1   | 2   | 0 | 0 | 0 |
| 4930405A            | -4.527408 | 0.230652  | 6.59475  | 0.010227993 | 1        | 2  | 2  | 2   | 3   | 0 | 0 | 0 |
| Gm34858             | -4.517019 | -0.159551 | 4.238619 | 0.039514301 | 1        | 0  | 3  | 5   | 0   | 0 | 0 | 0 |
| Rp1                 | -4.507303 | 0.055978  | 4.894961 | 0.026935185 | 1        | 5  | 0  | 2   | 1   | 0 | 0 | 0 |
| Adam23              | -4.502717 | 6.778601  | 10.14145 | 0.001449719 | 0.869252 | 5  | 3  | 0   | 1   | 0 | 0 | 0 |
| Gm33234             | -4.495222 | -0.65052  | 4.904659 | 0.026784341 | 1        | 3  | 1  | 3   | 1   | 0 | 0 | 0 |
| Gm30627             | -4.495155 | -0.031477 | 7.28273  | 0.006962065 | 1        | 1  | 3  | 2   | 3   | 0 | 0 | 0 |
| Stac                | -4.491769 | 4.285059  | 9.970782 | 0.001590439 | 0.88998  | 0  | 6  | 0   | 3   | 0 | 0 | 0 |
| Mlc1                | -4.491459 | 3.899752  | 9.894808 | 0.001657457 | 0.88998  | 0  | 2  | 0   | 7   | 0 | 0 | 0 |
| Cerkl               | -4.488455 | 0.885266  | 7.438036 | 0.006385955 | 1        | 0  | 1  | 2   | 6   | 0 | 0 | 0 |
| Gm34628             | -4.452289 | -0.794073 | 4.088336 | 0.043180142 | 1        | 2  | 3  | 3   | 0   | 0 | 0 | 0 |
| Gm33703             | -4.429516 | -0.029279 | 5.620758 | 0.017748975 | 1        | 1  | 0  | 3   | 4   | 0 | 0 | 0 |
| 9630028I0           | -4.413932 | -0.054115 | 6.538496 | 0.010556459 | 1        | 1  | 0  | 3   | 4   | 0 | 0 | 0 |
| Gm38516             | -4.409171 | -0.528302 | 4.848665 | 0.027667532 | 1        | 2  | 0  | 2   | 4   | 0 | 0 | 0 |
| Lama1               | -4.389929 | 0.440573  | 6.390424 | 0.011473759 | 1        | 0  | 0  | 3   | 5   | 0 | 0 | 0 |
| H2-Q7               | -4.378188 | 0.672591  | 5.842855 | 0.015640425 | 1        | 5  | 0  | 0   | 3   | 0 | 0 | 0 |
| Reck                | -4.373113 | 0.442222  | 7.052889 | 0.007913752 | 1        | 1  | 4  | 3   | 0   | 0 | 0 | 0 |
| a                   | -4.357529 | -0.049012 | 4.580007 | 0.032347087 | 1        | 0  | 5  | 3   | 0   | 0 | 0 | 0 |
| Gm39648             | -4.351223 | -0.045146 | 5.024175 | 0.024995826 | 1        | 5  | 3  | 0   | 0   | 0 | 0 | 0 |
| Syt5                | -4.344812 | 4.335251  | 8.851657 | 0.002928229 | 1        | 5  | 1  | 0   | 2   | 0 | 0 | 0 |
| Tmem178I            | -4.337294 | 5.064478  | 8.961871 | 0.002756725 | 1        | 1  | 1  | 0   | 6   | 0 | 0 | 0 |

|           |           |           |          |             |          |   |    |   |    |   |   |   |
|-----------|-----------|-----------|----------|-------------|----------|---|----|---|----|---|---|---|
| Evl       | -4.333955 | 1.722686  | 8.250938 | 0.004073094 | 1        | 1 | 5  | 2 | 0  | 0 | 0 | 0 |
| Chst7     | -4.318482 | -0.023666 | 3.866154 | 0.049269297 | 1        | 0 | 0  | 6 | 0  | 0 | 0 | 0 |
| Gm30992   | -4.312581 | -0.514095 | 4.735129 | 0.029552639 | 1        | 1 | 0  | 1 | 6  | 0 | 0 | 0 |
| Plcb2     | -4.296054 | 0.032452  | 4.33313  | 0.037377443 | 1        | 0 | 0  | 6 | 0  | 0 | 0 | 0 |
| Gm12248   | -4.293082 | -0.353228 | 4.830823 | 0.027955288 | 1        | 1 | 2  | 1 | 4  | 0 | 0 | 0 |
| Naip6     | -4.274043 | -0.195181 | 3.934567 | 0.047303313 | 1        | 2 | 0  | 0 | 6  | 0 | 0 | 0 |
| Ccdc36    | -4.212214 | -0.636381 | 4.697356 | 0.030209062 | 1        | 1 | 0  | 2 | 4  | 0 | 0 | 0 |
| Cd160     | -4.20329  | 0.191791  | 6.014605 | 0.014187954 | 1        | 0 | 6  | 0 | 2  | 0 | 0 | 0 |
| Cntf      | -4.199386 | 0.019567  | 3.891733 | 0.04852433  | 1        | 3 | 0  | 3 | 0  | 0 | 0 | 0 |
| Gm34283   | -4.186615 | 0.064735  | 5.201398 | 0.022568728 | 1        | 1 | 2  | 2 | 2  | 0 | 0 | 0 |
| Gm33195   | -4.176034 | 0.079939  | 6.393549 | 0.01145358  | 1        | 1 | 2  | 2 | 2  | 0 | 0 | 0 |
| Nudt10    | -4.173544 | 2.464838  | 7.772129 | 0.005305847 | 1        | 1 | 2  | 4 | 0  | 0 | 0 | 0 |
| Gm32720   | -4.170046 | 0.759447  | 6.785922 | 0.009187954 | 1        | 3 | 3  | 1 | 0  | 0 | 0 | 0 |
| 170006511 | -4.163479 | -0.141701 | 5.378299 | 0.020388751 | 1        | 4 | 2  | 0 | 1  | 0 | 0 | 0 |
| Rasgrf2   | -4.162706 | 5.019307  | 7.774973 | 0.005297499 | 1        | 1 | 0  | 2 | 4  | 0 | 0 | 0 |
| Gm36917   | -4.160373 | -0.774196 | 4.481055 | 0.034272561 | 1        | 1 | 1  | 4 | 0  | 0 | 0 | 0 |
| Gm15396   | -4.154802 | -0.720107 | 6.324269 | 0.011909658 | 1        | 0 | 2  | 2 | 3  | 0 | 0 | 0 |
| Kcnmb2    | -4.140111 | 2.600112  | 7.586559 | 0.005880509 | 1        | 0 | 3  | 0 | 4  | 0 | 0 | 0 |
| Anxa11    | -4.13782  | -0.545831 | 4.802368 | 0.028420653 | 1        | 2 | 4  | 1 | 0  | 0 | 0 | 0 |
| 4931423N  | -4.136097 | -0.468177 | 4.846925 | 0.02769546  | 1        | 1 | 1  | 1 | 4  | 0 | 0 | 0 |
| LOC108161 | -4.121761 | -0.643989 | 3.852205 | 0.049680636 | 1        | 3 | 2  | 0 | 2  | 0 | 0 | 0 |
| Spata17   | -4.121057 | -0.453748 | 3.882421 | 0.048794144 | 1        | 5 | 0  | 1 | 0  | 0 | 0 | 0 |
| Gc        | -4.103963 | 0.239476  | 4.51938  | 0.033512968 | 1        | 5 | 0  | 1 | 0  | 0 | 0 | 0 |
| Ahrr      | -4.08398  | -0.449125 | 3.90872  | 0.048036184 | 1        | 1 | 5  | 1 | 0  | 0 | 0 | 0 |
| Gm32694   | -4.072721 | -0.3054   | 3.981035 | 0.04601529  | 1        | 2 | 3  | 0 | 2  | 0 | 0 | 0 |
| Il1rl1    | -4.069509 | 0.718163  | 6.043647 | 0.013956425 | 1        | 3 | 0  | 3 | 0  | 0 | 0 | 0 |
| Lrrc18    | -4.067495 | 0.010919  | 4.614996 | 0.031693576 | 1        | 1 | 2  | 3 | 0  | 0 | 0 | 0 |
| Gm31402   | -4.065579 | -0.396254 | 4.171896 | 0.041099788 | 1        | 0 | 0  | 3 | 3  | 0 | 0 | 0 |
| Vaultrc5  | -4.048575 | -0.015661 | 3.953211 | 0.046782024 | 1        | 2 | 2  | 2 | 0  | 0 | 0 | 0 |
| A830082K  | -4.048328 | 1.075979  | 6.088125 | 0.013609342 | 1        | 0 | 7  | 0 | 0  | 0 | 0 | 0 |
| Fam167a   | -4.040828 | 0.507363  | 5.944798 | 0.014760783 | 1        | 0 | 7  | 0 | 0  | 0 | 0 | 0 |
| 4933413J0 | -4.03917  | -0.573391 | 4.403103 | 0.035873603 | 1        | 2 | 2  | 2 | 0  | 0 | 0 | 0 |
| LOC102633 | -4.027167 | -0.886794 | 4.886842 | 0.027062138 | 1        | 2 | 2  | 2 | 0  | 0 | 0 | 0 |
| Gm40706   | -4.0237   | -0.466374 | 4.344871 | 0.037120584 | 1        | 0 | 3  | 3 | 0  | 0 | 0 | 0 |
| Gm34268   | -4.017874 | -0.121433 | 4.745958 | 0.029367194 | 1        | 1 | 0  | 2 | 3  | 0 | 0 | 0 |
| Pxdn      | -4.014389 | 2.299819  | 6.535245 | 0.010575764 | 1        | 2 | 0  | 4 | 0  | 0 | 0 | 0 |
| Gal3st3   | -4.010738 | 1.881369  | 5.906172 | 0.015087919 | 1        | 1 | 2  | 3 | 0  | 0 | 0 | 0 |
| Gm35193   | -3.985455 | -0.887149 | 3.998477 | 0.045541393 | 1        | 4 | 1  | 0 | 1  | 0 | 0 | 0 |
| Gm19461   | -3.971489 | 1.850681  | 6.644164 | 0.009948117 | 1        | 5 | 0  | 1 | 0  | 0 | 0 | 0 |
| Sh2b2     | -3.966155 | 0.790634  | 5.306233 | 0.021249256 | 1        | 0 | 1  | 2 | 3  | 0 | 0 | 0 |
| Ppp1r16b  | -3.952411 | 3.781512  | 6.71505  | 0.009560262 | 1        | 0 | 3  | 3 | 0  | 0 | 0 | 0 |
| Adgrb1    | -3.948307 | 3.85242   | 6.652049 | 0.009904188 | 1        | 0 | 3  | 2 | 1  | 0 | 0 | 0 |
| Dner      | -3.946981 | 6.751018  | 6.749089 | 0.009379557 | 1        | 1 | 1  | 0 | 4  | 0 | 0 | 0 |
| Gm35143   | -3.942958 | -0.761623 | 4.731765 | 0.029610476 | 1        | 1 | 1  | 1 | 3  | 0 | 0 | 0 |
| LOC108161 | -3.941067 | -0.443753 | 3.843825 | 0.04992949  | 1        | 0 | 0  | 4 | 1  | 0 | 0 | 0 |
| Inpp5j    | -3.937555 | 4.693939  | 6.647956 | 0.009926964 | 1        | 0 | 5  | 0 | 1  | 0 | 0 | 0 |
| Slitrk2   | -3.9331   | 3.079538  | 6.547149 | 0.010505234 | 1        | 0 | 3  | 0 | 3  | 0 | 0 | 0 |
| P2ry12    | -3.928499 | 1.5783    | 6.10249  | 0.013499154 | 1        | 2 | 3  | 0 | 1  | 0 | 0 | 0 |
| Extl1     | -3.925329 | 1.644354  | 6.377677 | 0.011556462 | 1        | 0 | 2  | 0 | 4  | 0 | 0 | 0 |
| C130060K  | -3.924384 | 0.040335  | 4.584836 | 0.032256065 | 1        | 2 | 0  | 0 | 4  | 0 | 0 | 0 |
| Gm35165   | -3.923931 | -0.868829 | 5.682632 | 0.017133648 | 1        | 2 | 2  | 0 | 2  | 0 | 0 | 0 |
| Trim46    | -3.921355 | 3.011813  | 6.414336 | 0.011320262 | 1        | 0 | 5  | 0 | 1  | 0 | 0 | 0 |
| 2610307P1 | -3.919683 | 1.270753  | 6.319164 | 0.011943995 | 1        | 0 | 3  | 0 | 3  | 0 | 0 | 0 |
| Itpka     | -3.914633 | -0.183241 | 4.111639 | 0.042589061 | 1        | 0 | 0  | 1 | 5  | 0 | 0 | 0 |
| Gpr183    | -3.889692 | 0.650759  | 10.50679 | 0.00118937  | 0.75068  | 7 | 6  | 3 | 10 | 1 | 0 | 0 |
| Cpsf4l    | -3.879379 | -0.152728 | 4.471889 | 0.034456886 | 1        | 2 | 4  | 0 | 0  | 0 | 0 | 0 |
| Pnma3     | -3.877341 | 0.842892  | 5.140175 | 0.023378286 | 1        | 0 | 0  | 5 | 0  | 0 | 0 | 0 |
| Rec114    | -3.852641 | 0.5716    | 4.626061 | 0.031489782 | 1        | 3 | 0  | 2 | 0  | 0 | 0 | 0 |
| Ajap1     | -3.843902 | 0.429459  | 4.032451 | 0.044633065 | 1        | 1 | 3  | 0 | 2  | 0 | 0 | 0 |
| Il1rapl1  | -3.84219  | 0.816949  | 4.943649 | 0.026186701 | 1        | 0 | 0  | 4 | 1  | 0 | 0 | 0 |
| Mx2       | -3.835942 | 0.979165  | 10.23421 | 0.001378599 | 0.855111 | 1 | 16 | 1 | 8  | 0 | 0 | 1 |
| 4930432J0 | -3.835548 | -0.443999 | 3.999646 | 0.045509817 | 1        | 2 | 1  | 2 | 0  | 0 | 0 | 0 |
| Slc47a2   | -3.831632 | 0.034201  | 4.633975 | 0.031344857 | 1        | 1 | 1  | 3 | 0  | 0 | 0 | 0 |
| Gpr182    | -3.808454 | 0.210147  | 4.686196 | 0.030405896 | 1        | 0 | 6  | 0 | 0  | 0 | 0 | 0 |
| Gm31279   | -3.800583 | -0.38064  | 4.535245 | 0.033203709 | 1        | 0 | 1  | 3 | 1  | 0 | 0 | 0 |
| LOC102633 | -3.799944 | -0.566275 | 3.923273 | 0.047622072 | 1        | 3 | 1  | 1 | 0  | 0 | 0 | 0 |
| Kcnq4     | -3.765534 | 5.642545  | 18.5556  | 1.65019E-05 | 0.118735 | 6 | 6  | 5 | 6  | 1 | 0 | 0 |
| Gm16035   | -3.760932 | 1.045479  | 5.396956 | 0.020171904 | 1        | 3 | 6  | 2 | 0  | 0 | 0 | 0 |
| Gm41556   | -3.74838  | 0.809916  | 4.746009 | 0.029366327 | 1        | 2 | 0  | 1 | 2  | 0 | 0 | 0 |
| Slc13a3   | -3.741668 | 3.157903  | 5.354516 | 0.020668673 | 1        | 5 | 0  | 0 | 0  | 0 | 0 | 0 |
| Shisa9    | -3.737446 | 0.118338  | 4.290459 | 0.038326811 | 1        | 2 | 2  | 1 | 0  | 0 | 0 | 0 |
| Kcnk12    | -3.730539 | 1.177266  | 5.161611 | 0.02309147  | 1        | 4 | 1  | 0 | 0  | 0 | 0 | 0 |
| Sptbn5    | -3.724562 | 0.549872  | 4.375468 | 0.036459825 | 1        | 1 | 0  | 1 | 3  | 0 | 0 | 0 |
| Gm33753   | -3.722009 | -0.689542 | 4.066515 | 0.043741442 | 1        | 0 | 3  | 2 | 0  | 0 | 0 | 0 |



|           |           |           |          |             |          |     |    |    |    |   |    |   |
|-----------|-----------|-----------|----------|-------------|----------|-----|----|----|----|---|----|---|
| Lepr      | -3.715931 | 0.890517  | 4.538283 | 0.033144816 | 1        | 0   | 3  | 2  | 0  | 0 | 0  | 0 |
| Maneal    | -3.709627 | 4.037997  | 5.569998 | 0.018270781 | 1        | 0   | 0  | 2  | 3  | 0 | 0  | 0 |
| Adamts15  | -3.707739 | 2.850974  | 5.606273 | 0.017896288 | 1        | 2   | 1  | 1  | 1  | 0 | 0  | 0 |
| Gjb1      | -3.707394 | 4.306355  | 5.583246 | 0.018133079 | 1        | 2   | 2  | 1  | 0  | 0 | 0  | 0 |
| Nptx1     | -3.704137 | 6.035924  | 5.636172 | 0.01759358  | 1        | 2   | 1  | 0  | 2  | 0 | 0  | 0 |
| Arhgdig   | -3.703099 | 6.290981  | 5.6281   | 0.017674776 | 1        | 0   | 2  | 1  | 2  | 0 | 0  | 0 |
| Mpped1    | -3.694308 | 1.271261  | 4.866959 | 0.027375697 | 1        | 2   | 1  | 0  | 2  | 0 | 0  | 0 |
| E130114P1 | -3.686847 | 1.398398  | 5.478742 | 0.019249103 | 1        | 0   | 5  | 0  | 0  | 0 | 0  | 0 |
| Usp29     | -3.682834 | 2.535857  | 5.389028 | 0.020263754 | 1        | 0   | 3  | 0  | 2  | 0 | 0  | 0 |
| Gm33392   | -3.679388 | -0.200677 | 4.208531 | 0.040221145 | 1        | 0   | 1  | 1  | 3  | 0 | 0  | 0 |
| Hist1h2ad | -3.656164 | -0.690432 | 4.310193 | 0.037884663 | 1        | 1   | 1  | 0  | 3  | 0 | 0  | 0 |
| Gm14808   | -3.63962  | 0.433133  | 4.363996 | 0.036706112 | 1        | 0   | 0  | 0  | 5  | 0 | 0  | 0 |
| Gm33040   | -3.634172 | 1.406952  | 4.85298  | 0.027598417 | 1        | 0   | 5  | 0  | 0  | 0 | 0  | 0 |
| LOC10524  | -3.609561 | -0.301499 | 3.920442 | 0.04770234  | 1        | 1   | 4  | 0  | 0  | 0 | 0  | 0 |
| Gm16897   | -3.559467 | -0.162555 | 4.047941 | 0.044225245 | 1        | 1   | 0  | 3  | 0  | 0 | 0  | 0 |
| LOC10263  | -3.517438 | 0.101747  | 4.085436 | 0.043254284 | 1        | 6   | 1  | 7  | 4  | 1 | 0  | 0 |
| Slc10a6   | -3.438825 | 0.975019  | 4.15029  | 0.041627397 | 1        | 0   | 1  | 2  | 1  | 0 | 0  | 0 |
| Trim9     | -3.429308 | 4.345109  | 13.19618 | 0.000280521 | 0.509334 | 12  | 3  | 1  | 2  | 1 | 0  | 0 |
| Lck       | -3.42235  | 0.581034  | 4.176864 | 0.040979473 | 1        | 1   | 1  | 1  | 1  | 0 | 0  | 0 |
| Mir124-2h | -3.416657 | 0.806869  | 4.112847 | 0.042558652 | 1        | 2   | 0  | 0  | 2  | 0 | 0  | 0 |
| Stac2     | -3.414052 | 4.686021  | 4.510299 | 0.033691357 | 1        | 2   | 0  | 1  | 1  | 0 | 0  | 0 |
| Dusp15    | -3.413617 | 5.422177  | 4.506716 | 0.033761994 | 1        | 0   | 0  | 2  | 2  | 0 | 0  | 0 |
| Cpne4     | -3.411873 | 4.910811  | 4.507995 | 0.033736761 | 1        | 3   | 1  | 0  | 0  | 0 | 0  | 0 |
| Tmeff2    | -3.411865 | 5.004289  | 4.508139 | 0.033733927 | 1        | 3   | 1  | 0  | 0  | 0 | 0  | 0 |
| Kcnt1     | -3.408732 | 3.777935  | 4.491228 | 0.034069187 | 1        | 1   | 0  | 0  | 3  | 0 | 0  | 0 |
| Celsr3    | -3.408219 | 3.38608   | 4.483083 | 0.034231921 | 1        | 0   | 2  | 1  | 1  | 0 | 0  | 0 |
| Lrrn1     | -3.408129 | 5.423629  | 4.515307 | 0.033592856 | 1        | 0   | 1  | 0  | 3  | 0 | 0  | 0 |
| Gm10419   | -3.407756 | 4.614146  | 4.492154 | 0.034050749 | 1        | 0   | 3  | 1  | 0  | 0 | 0  | 0 |
| Notch4    | -3.40279  | 0.918817  | 3.975854 | 0.046157035 | 1        | 0   | 1  | 1  | 2  | 0 | 0  | 0 |
| Ptprn2    | -3.402385 | 4.055296  | 4.456092 | 0.034776966 | 1        | 0   | 2  | 0  | 2  | 0 | 0  | 0 |
| Srrm4     | -3.402339 | 2.803423  | 4.361467 | 0.036760644 | 1        | 1   | 1  | 0  | 2  | 0 | 0  | 0 |
| Cldn5     | -3.401366 | 3.74065   | 4.389792 | 0.036154729 | 1        | 1   | 2  | 0  | 1  | 0 | 0  | 0 |
| Aard      | -3.401299 | 2.350652  | 4.40748  | 0.035781669 | 1        | 0   | 0  | 0  | 4  | 0 | 0  | 0 |
| Adamts4   | -3.398523 | 1.389901  | 3.852289 | 0.049678161 | 1        | 2   | 2  | 0  | 0  | 0 | 0  | 0 |
| Rian      | -3.394051 | 1.963441  | 4.296409 | 0.03819294  | 1        | 0   | 0  | 0  | 4  | 0 | 0  | 0 |
| Itgb3     | -3.392379 | 3.192407  | 4.383305 | 0.036292551 | 1        | 0   | 4  | 0  | 0  | 0 | 0  | 0 |
| Gm7616    | -3.387173 | -0.424862 | 6.565448 | 0.010397756 | 1        | 2   | 8  | 6  | 2  | 0 | 1  | 0 |
| Myo16     | -3.387118 | 0.724691  | 3.983382 | 0.045951211 | 1        | 0   | 3  | 1  | 0  | 0 | 0  | 0 |
| Nsg1      | -3.348778 | 4.186213  | 12.31225 | 0.000449994 | 0.622654 | 8   | 1  | 3  | 5  | 0 | 1  | 0 |
| Rasl10a   | -3.343697 | 0.611745  | 3.850186 | 0.049740471 | 1        | 0   | 3  | 0  | 1  | 0 | 0  | 0 |
| Tnfrsf13c | -3.338571 | 0.389558  | 3.867913 | 0.0492177   | 1        | 0   | 4  | 0  | 0  | 0 | 0  | 0 |
| Tnc       | -3.333613 | 0.930741  | 10.56234 | 0.001154152 | 0.75068  | 6   | 9  | 10 | 5  | 1 | 1  | 0 |
| Ltbp2     | -3.328065 | 1.698738  | 8.831867 | 0.002960154 | 1        | 2   | 8  | 2  | 6  | 0 | 1  | 0 |
| Unkl      | -3.184805 | -0.05042  | 4.163706 | 0.041298948 | 1        | 5   | 4  | 2  | 5  | 1 | 0  | 0 |
| Tnfaip81l | -3.177117 | 2.55769   | 8.37014  | 0.003814362 | 1        | 1   | 6  | 2  | 7  | 0 | 1  | 0 |
| LOC10816  | -3.177082 | 0.254543  | 4.491898 | 0.03405585  | 1        | 7   | 4  | 6  | 12 | 1 | 1  | 0 |
| 1700018LC | -3.176231 | -0.040777 | 6.055677 | 0.013861661 | 1        | 4   | 4  | 2  | 6  | 0 | 1  | 0 |
| Serpina3h | -3.133323 | -0.068309 | 4.108086 | 0.042678644 | 1        | 8   | 1  | 3  | 2  | 1 | 0  | 0 |
| Rinl      | -3.092362 | 0.963263  | 6.740629 | 0.009424137 | 1        | 3   | 0  | 4  | 7  | 1 | 0  | 0 |
| Ptprz1    | -3.07315  | 5.336789  | 9.924145 | 0.001631246 | 0.88998  | 5   | 1  | 3  | 5  | 0 | 0  | 1 |
| LOC10816i | -2.881381 | 2.53905   | 6.849351 | 0.008867349 | 1        | 3   | 0  | 2  | 7  | 0 | 0  | 1 |
| Gm42289   | -2.880623 | 0.249333  | 4.630262 | 0.031412763 | 1        | 2   | 12 | 1  | 11 | 2 | 0  | 0 |
| Gm26721   | -2.87249  | 0.296724  | 4.301637 | 0.038075701 | 1        | 4   | 3  | 3  | 1  | 0 | 0  | 1 |
| LOC10264i | -2.862242 | 0.996483  | 6.496398 | 0.010809324 | 1        | 2   | 1  | 4  | 5  | 0 | 1  | 0 |
| Cadm3     | -2.851791 | 7.767142  | 8.057137 | 0.004532476 | 1        | 3   | 5  | 3  | 1  | 0 | 0  | 1 |
| Dysf      | -2.850681 | 4.811228  | 8.061779 | 0.004520878 | 1        | 3   | 4  | 4  | 1  | 1 | 0  | 0 |
| Tmod1     | -2.836094 | 2.263423  | 6.749707 | 0.009376307 | 1        | 0   | 0  | 1  | 11 | 0 | 0  | 1 |
| Skida1    | -2.829939 | 3.063744  | 7.239949 | 0.007129902 | 1        | 3   | 4  | 1  | 4  | 1 | 0  | 0 |
| Cxcl1     | -2.823399 | -0.025287 | 4.78353  | 0.028733163 | 1        | 1   | 8  | 1  | 3  | 1 | 0  | 0 |
| Crabp2    | -2.819607 | 1.465597  | 6.162288 | 0.013050233 | 1        | 0   | 0  | 8  | 4  | 0 | 0  | 0 |
| Acr       | -2.805672 | 0.238746  | 4.568076 | 0.032573121 | 1        | 2   | 6  | 0  | 4  | 0 | 0  | 1 |
| Ppp1r14a  | -2.790978 | 2.741422  | 6.719782 | 0.009534926 | 1        | 5   | 0  | 4  | 2  | 0 | 0  | 1 |
| Ttll8     | -2.754377 | 1.723184  | 6.441969 | 0.011145505 | 1        | 4   | 3  | 2  | 2  | 0 | 0  | 1 |
| Gm40571   | -2.743961 | 0.632659  | 8.644221 | 0.003281005 | 1        | 8   | 5  | 1  | 6  | 0 | 1  | 1 |
| Ankrd33b  | -2.734713 | 1.971212  | 6.301226 | 0.012065447 | 1        | 2   | 0  | 1  | 8  | 0 | 0  | 1 |
| LOC10264i | -2.70783  | 0.904844  | 5.305333 | 0.02126024  | 1        | 0   | 1  | 3  | 7  | 1 | 0  | 0 |
| Gm29883   | -2.692984 | 1.489204  | 5.820453 | 0.015840861 | 1        | 3   | 9  | 9  | 9  | 0 | 3  | 0 |
| Gm41577   | -2.683928 | 3.159376  | 6.043307 | 0.01395911  | 1        | 108 | 17 | 89 | 23 | 9 | 13 | 8 |
| LOC10263  | -2.640052 | 0.992065  | 4.53499  | 0.033208642 | 1        | 2   | 7  | 1  | 1  | 1 | 0  | 0 |
| March1    | -2.607978 | 1.508503  | 4.73805  | 0.029502486 | 1        | 3   | 0  | 0  | 7  | 0 | 0  | 1 |
| Tvp23bos  | -2.596969 | 1.873543  | 6.62618  | 0.010049057 | 1        | 1   | 4  | 11 | 1  | 0 | 2  | 0 |
| Gm16263   | -2.583067 | 0.08403   | 6.772655 | 0.009256503 | 1        | 4   | 4  | 5  | 5  | 0 | 2  | 0 |
| Car7      | -2.581111 | 1.342408  | 5.029799 | 0.024914795 | 1        | 0   | 2  | 3  | 5  | 1 | 0  | 0 |
| Col9a2    | -2.566301 | 2.924113  | 8.485938 | 0.003579021 | 1        | 11  | 1  | 2  | 3  | 1 | 0  | 1 |

|           |           |           |          |              |          |    |    |    |    |   |   |    |
|-----------|-----------|-----------|----------|--------------|----------|----|----|----|----|---|---|----|
| Prrx2     | -2.558336 | 1.079589  | 4.379    | 0.036384333  | 1        | 3  | 8  | 4  | 1  | 0 | 0 | 2  |
| B3gnt6    | -2.542935 | 0.180224  | 5.267206 | 0.021730863  | 1        | 3  | 7  | 4  | 4  | 2 | 0 | 0  |
| Gm41622   | -2.540118 | 1.793573  | 13.02553 | 0.000307273  | 0.509334 | 16 | 7  | 9  | 27 | 1 | 1 | 6  |
| Insm2     | -2.536125 | 1.969905  | 8.715673 | 0.003154859  | 1        | 1  | 3  | 7  | 13 | 1 | 0 | 2  |
| Gm30368   | -2.531189 | 0.580871  | 4.89364  | 0.026955796  | 1        | 3  | 6  | 4  | 4  | 0 | 1 | 1  |
| Nos1      | -2.499244 | 4.466061  | 11.60165 | 0.000658933  | 0.632525 | 7  | 10 | 6  | 1  | 1 | 1 | 1  |
| Greb1l    | -2.481419 | 1.560441  | 8.240636 | 0.004096278  | 1        | 3  | 5  | 4  | 11 | 0 | 0 | 3  |
| 6430550D: | -2.470848 | 0.296381  | 5.543143 | 0.018553237  | 1        | 3  | 6  | 10 | 7  | 0 | 0 | 4  |
| Slc26a8   | -2.461043 | -0.132587 | 4.07354  | 0.043559901  | 1        | 2  | 7  | 3  | 6  | 1 | 1 | 0  |
| Cyp17a1   | -2.460488 | 0.184633  | 7.596868 | 0.005846979  | 1        | 8  | 8  | 3  | 11 | 0 | 1 | 3  |
| LOC10263: | -2.458851 | -0.288007 | 5.795509 | 0.016067165  | 1        | 2  | 5  | 5  | 11 | 0 | 1 | 2  |
| Synpr     | -2.452401 | 5.66366   | 5.330019 | 0.020961161  | 1        | 5  | 2  | 1  | 1  | 0 | 0 | 1  |
| Chga      | -2.451018 | 6.951591  | 5.341372 | 0.020825071  | 1        | 4  | 1  | 1  | 3  | 0 | 0 | 1  |
| 6330403K: | -2.446971 | 4.309478  | 5.191209 | 0.022701423  | 1        | 1  | 5  | 3  | 0  | 1 | 0 | 0  |
| Lrriq1    | -2.441309 | 2.492961  | 5.034513 | 0.024847066  | 1        | 1  | 2  | 0  | 6  | 0 | 0 | 1  |
| LOC10816: | -2.432777 | 0.303683  | 5.658661 | 0.017369383  | 1        | 13 | 4  | 7  | 10 | 1 | 1 | 3  |
| Aqp11     | -2.395472 | 1.674428  | 4.354043 | 0.0369212    | 1        | 1  | 3  | 0  | 5  | 1 | 0 | 0  |
| BC025920  | -2.383869 | 0.906987  | 4.687842 | 0.030376767  | 1        | 3  | 7  | 1  | 5  | 1 | 0 | 1  |
| Vat1l     | -2.36408  | 6.458393  | 11.13174 | 0.00084863   | 0.679882 | 4  | 5  | 1  | 12 | 1 | 0 | 2  |
| Zic1      | -2.356987 | 2.837442  | 11.23659 | 0.000802005  | 0.679882 | 14 | 11 | 8  | 13 | 1 | 1 | 5  |
| Drp2      | -2.350431 | 7.035631  | 7.943057 | 0.004827222  | 1        | 3  | 2  | 8  | 2  | 1 | 1 | 0  |
| 1500004A: | -2.343867 | 3.603099  | 7.367772 | 0.006640317  | 1        | 4  | 4  | 4  | 3  | 0 | 2 | 0  |
| Mmnr2     | -2.311469 | 2.569498  | 6.401949 | 0.011399513  | 1        | 4  | 7  | 0  | 4  | 0 | 1 | 1  |
| Ptgir     | -2.295135 | 5.002621  | 4.294116 | 0.038244467  | 1        | 0  | 3  | 3  | 2  | 0 | 0 | 1  |
| Gm31166   | -2.293813 | 1.404617  | 4.602545 | 0.031924523  | 1        | 7  | 3  | 3  | 0  | 0 | 0 | 2  |
| Fabp7     | -2.293727 | 6.956099  | 4.325765 | 0.037539536  | 1        | 3  | 2  | 1  | 2  | 0 | 0 | 1  |
| Gm31633   | -2.282568 | 0.466104  | 4.275831 | 0.038658063  | 1        | 10 | 4  | 7  | 4  | 0 | 2 | 2  |
| Fstl4     | -2.276807 | 2.602653  | 12.53997 | 0.000398338  | 0.573225 | 3  | 13 | 7  | 10 | 1 | 0 | 4  |
| Gm40142   | -2.245542 | 0.579779  | 5.22678  | 0.0222441666 | 1        | 8  | 4  | 3  | 5  | 1 | 1 | 1  |
| Pde1a     | -2.239312 | 2.975759  | 8.485923 | 0.00357905   | 1        | 15 | 6  | 0  | 5  | 1 | 1 | 2  |
| Tmod2     | -2.23038  | 7.824253  | 9.552036 | 0.001997277  | 0.981214 | 5  | 8  | 3  | 4  | 1 | 1 | 1  |
| LOC10263: | -2.208225 | 0.930841  | 4.139344 | 0.041897415  | 1        | 4  | 10 | 7  | 5  | 3 | 0 | 1  |
| Coro2b    | -2.207544 | 6.191746  | 13.45511 | 0.00024434   | 0.509334 | 7  | 9  | 1  | 15 | 1 | 1 | 3  |
| Srl       | -2.200961 | 1.666259  | 4.785107 | 0.02870686   | 1        | 7  | 3  | 0  | 4  | 1 | 1 | 0  |
| Slc6a13   | -2.18931  | 3.084767  | 5.799563 | 0.016030159  | 1        | 10 | 1  | 2  | 0  | 1 | 0 | 1  |
| Rasip1    | -2.157082 | 2.856901  | 5.519258 | 0.018808234  | 1        | 0  | 3  | 5  | 5  | 0 | 1 | 1  |
| Pcp4      | -2.152615 | 7.95484   | 20.66738 | 5.4639E-06   | 0.098285 | 17 | 16 | 8  | 7  | 4 | 2 | 2  |
| Lgals4    | -2.104636 | 1.776446  | 7.206262 | 0.007264966  | 1        | 9  | 19 | 15 | 2  | 3 | 2 | 3  |
| L3mbtl1   | -2.098597 | 1.028991  | 5.154055 | 0.023192157  | 1        | 1  | 1  | 3  | 13 | 1 | 0 | 2  |
| Rassf10   | -2.080501 | 1.923703  | 4.894659 | 0.026939888  | 1        | 2  | 3  | 6  | 1  | 1 | 0 | 1  |
| Gm16894   | -2.073337 | 0.671947  | 3.999517 | 0.045513315  | 1        | 4  | 5  | 3  | 0  | 1 | 0 | 1  |
| Ccdc106   | -2.068754 | 1.26961   | 6.764725 | 0.009297726  | 1        | 4  | 7  | 1  | 12 | 2 | 0 | 2  |
| Spats1    | -2.03979  | 0.887575  | 4.646694 | 0.031113413  | 1        | 3  | 2  | 0  | 7  | 0 | 0 | 2  |
| Syt14     | -2.029522 | 3.114973  | 7.088217 | 0.00775924   | 1        | 4  | 5  | 12 | 6  | 3 | 1 | 1  |
| Mnda      | -2.016902 | 1.090737  | 5.956042 | 0.014666932  | 1        | 14 | 16 | 10 | 12 | 0 | 4 | 6  |
| Cyp7b1    | -2.013839 | 2.012273  | 4.14028  | 0.04187423   | 1        | 5  | 3  | 2  | 2  | 0 | 2 | 0  |
| Syp       | -2.004911 | 6.965339  | 7.180097 | 0.007371672  | 1        | 6  | 4  | 1  | 6  | 1 | 0 | 2  |
| Gulp1     | -2.000409 | 4.655951  | 8.818239 | 0.002982343  | 1        | 5  | 3  | 10 | 4  | 4 | 0 | 0  |
| Slc4a5    | -1.970564 | 1.041745  | 6.456901 | 0.011052221  | 1        | 24 | 30 | 5  | 14 | 4 | 0 | 11 |
| Pcsk2     | -1.913028 | 6.453685  | 6.255673 | 0.012379624  | 1        | 2  | 9  | 2  | 3  | 0 | 1 | 2  |
| Platr14   | -1.911853 | 0.44118   | 3.994993 | 0.045635628  | 1        | 3  | 5  | 3  | 4  | 0 | 0 | 3  |
| Gm16118   | -1.910292 | 0.546932  | 4.287965 | 0.038383088  | 1        | 7  | 6  | 10 | 4  | 1 | 1 | 4  |
| Scarna17  | -1.909848 | 1.532545  | 6.535949 | 0.010571582  | 1        | 23 | 19 | 4  | 13 | 8 | 1 | 2  |
| Tspyl4    | -1.882739 | 6.172304  | 18.94601 | 1.3447E-05   | 0.118735 | 9  | 34 | 14 | 19 | 7 | 4 | 4  |
| Gm15411   | -1.870529 | 1.606648  | 6.590711 | 0.010251225  | 1        | 1  | 13 | 4  | 9  | 4 | 1 | 0  |
| Nr2f1     | -1.859445 | 5.713022  | 13.07239 | 0.000299681  | 0.509334 | 5  | 17 | 3  | 15 | 2 | 4 | 2  |
| Rasa4     | -1.858106 | 1.955218  | 3.892742 | 0.048495184  | 1        | 7  | 0  | 4  | 3  | 1 | 0 | 2  |
| Gm15866   | -1.836228 | 1.560613  | 5.917105 | 0.014994574  | 1        | 17 | 23 | 15 | 17 | 3 | 6 | 6  |
| Fam19a1   | -1.827198 | 3.531299  | 7.744818 | 0.00538669   | 1        | 5  | 11 | 3  | 5  | 0 | 0 | 5  |
| Slc35f1   | -1.825131 | 5.818456  | 5.389953 | 0.020253021  | 1        | 1  | 2  | 5  | 7  | 3 | 0 | 0  |
| Camk2b    | -1.822722 | 4.839911  | 5.339636 | 0.020845827  | 1        | 4  | 6  | 4  | 1  | 2 | 1 | 0  |
| Lrrc75a   | -1.818881 | 2.551867  | 9.611871 | 0.001933236  | 0.979579 | 5  | 10 | 15 | 7  | 2 | 3 | 3  |
| Zic2      | -1.815801 | 2.945054  | 5.042259 | 0.024736207  | 1        | 5  | 4  | 1  | 11 | 0 | 4 | 0  |
| Negr1     | -1.811073 | 3.736321  | 7.956049 | 0.004792691  | 1        | 4  | 4  | 9  | 7  | 2 | 3 | 0  |
| Hmgcl1    | -1.808365 | 2.12137   | 4.936855 | 0.026289825  | 1        | 5  | 9  | 0  | 6  | 2 | 0 | 2  |
| Gm10677   | -1.806863 | 1.843324  | 6.775209 | 0.009243266  | 1        | 11 | 19 | 20 | 11 | 3 | 1 | 11 |
| Brsk1     | -1.788102 | 5.979026  | 6.495362 | 0.010815627  | 1        | 8  | 2  | 2  | 7  | 1 | 1 | 2  |
| Snap25    | -1.777069 | 8.981876  | 12.01274 | 0.000528381  | 0.629451 | 6  | 11 | 10 | 10 | 1 | 5 | 2  |
| BC034090  | -1.745773 | 1.809209  | 6.043845 | 0.013954861  | 1        | 7  | 8  | 3  | 13 | 2 | 0 | 5  |
| BC025446  | -1.73378  | 0.590683  | 6.500139 | 0.010786608  | 1        | 6  | 14 | 6  | 10 | 3 | 1 | 4  |
| Ppm1e     | -1.731097 | 4.465033  | 5.804011 | 0.015989661  | 1        | 4  | 5  | 6  | 3  | 1 | 0 | 3  |
| Gm3716    | -1.702562 | 1.437545  | 5.2785   | 0.021590341  | 1        | 18 | 21 | 6  | 11 | 4 | 5 | 3  |
| Cdh6      | -1.70121  | 4.794791  | 5.794286 | 0.016078345  | 1        | 5  | 3  | 3  | 7  | 1 | 2 | 1  |
| Pycr1     | -1.687331 | 1.29774   | 4.85742  | 0.027527471  | 1        | 5  | 8  | 5  | 4  | 1 | 2 | 2  |

|           |           |          |          |             |          |     |     |     |     |     |     |     |
|-----------|-----------|----------|----------|-------------|----------|-----|-----|-----|-----|-----|-----|-----|
| Pcsk1n    | -1.683    | 8.288263 | 7.082467 | 0.007784177 | 1        | 9   | 9   | 2   | 2   | 3   | 1   | 1   |
| Sorbs2os  | -1.665897 | 0.873847 | 4.738052 | 0.029502454 | 1        | 18  | 10  | 12  | 16  | 6   | 4   | 3   |
| Adam19    | -1.663656 | 4.50717  | 11.5858  | 0.000664572 | 0.632525 | 18  | 7   | 17  | 2   | 1   | 3   | 7   |
| Rdh12     | -1.663279 | 1.316214 | 4.033765 | 0.044598295 | 1        | 8   | 8   | 3   | 5   | 1   | 0   | 5   |
| 1700030Kc | -1.656955 | 0.99009  | 4.501834 | 0.033858519 | 1        | 4   | 13  | 4   | 14  | 3   | 1   | 4   |
| Runx3     | -1.632762 | 3.876376 | 5.665281 | 0.017303942 | 1        | 1   | 9   | 7   | 4   | 0   | 2   | 3   |
| Eml6      | -1.61579  | 2.084295 | 4.112318 | 0.042571964 | 1        | 3   | 12  | 10  | 16  | 2   | 6   | 1   |
| Prrg3     | -1.615147 | 5.311076 | 6.051611 | 0.013893614 | 1        | 7   | 5   | 3   | 6   | 2   | 2   | 1   |
| Tiam2     | -1.607076 | 2.226622 | 6.472459 | 0.010955884 | 1        | 23  | 26  | 19  | 25  | 4   | 5   | 16  |
| Cacna2d1  | -1.572114 | 6.767556 | 7.024979 | 0.008038042 | 1        | 3   | 4   | 9   | 8   | 1   | 1   | 4   |
| Gria1     | -1.558952 | 3.28212  | 9.167338 | 0.002463726 | 1        | 13  | 33  | 8   | 11  | 8   | 2   | 6   |
| Chn1      | -1.557955 | 5.565382 | 5.791062 | 0.016107854 | 1        | 7   | 8   | 2   | 3   | 1   | 0   | 4   |
| Cfap69    | -1.539853 | 2.272463 | 10.61052 | 0.001124464 | 0.749143 | 22  | 17  | 12  | 21  | 5   | 5   | 9   |
| Kcnb2     | -1.533082 | 6.964807 | 4.609547 | 0.03179444  | 1        | 2   | 6   | 0   | 8   | 0   | 1   | 3   |
| Akap5     | -1.528591 | 6.473028 | 18.68606 | 1.54105E-05 | 0.118735 | 21  | 18  | 17  | 36  | 8   | 8   | 8   |
| Cabyr     | -1.528216 | 2.868753 | 5.362163 | 0.02057823  | 1        | 7   | 5   | 6   | 5   | 0   | 3   | 3   |
| Ogdhl     | -1.526668 | 4.033356 | 7.586364 | 0.005881145 | 1        | 2   | 11  | 6   | 13  | 3   | 5   | 0   |
| Vcan      | -1.51706  | 2.451974 | 6.244794 | 0.012455889 | 1        | 20  | 11  | 2   | 6   | 2   | 5   | 3   |
| Spin2c    | -1.512983 | 0.992779 | 3.933218 | 0.047341274 | 1        | 2   | 15  | 1   | 17  | 3   | 3   | 2   |
| LOC10816f | -1.512431 | 1.678466 | 3.978603 | 0.046081765 | 1        | 12  | 16  | 9   | 7   | 1   | 7   | 3   |
| Arid5a    | -1.506166 | 2.314471 | 3.995134 | 0.045631812 | 1        | 2   | 10  | 0   | 4   | 2   | 0   | 2   |
| Erbp3     | -1.492865 | 1.74751  | 6.121012 | 0.01335843  | 1        | 15  | 28  | 20  | 16  | 9   | 5   | 7   |
| Pou4f1    | -1.482361 | 7.215058 | 5.205853 | 0.022510966 | 1        | 2   | 5   | 7   | 5   | 1   | 2   | 2   |
| Ppp1r1a   | -1.477026 | 4.721839 | 6.378136 | 0.011553472 | 1        | 4   | 16  | 3   | 4   | 2   | 4   | 1   |
| Snhg7     | -1.463035 | 3.003114 | 16.26381 | 5.51065E-05 | 0.230947 | 30  | 43  | 33  | 28  | 9   | 10  | 19  |
| Lgi4      | -1.455532 | 5.591779 | 3.895603 | 0.048412653 | 1        | 4   | 4   | 6   | 1   | 0   | 3   | 1   |
| Nxpe4     | -1.451669 | 1.173718 | 3.864864 | 0.049307204 | 1        | 13  | 5   | 8   | 4   | 3   | 1   | 5   |
| Srgn      | -1.444888 | 3.616581 | 5.127594 | 0.023548349 | 1        | 6   | 6   | 2   | 8   | 1   | 1   | 4   |
| 9330104Gf | -1.41786  | 2.030485 | 6.813584 | 0.009046699 | 1        | 8   | 25  | 11  | 20  | 7   | 9   | 0   |
| Rad51c    | -1.406249 | 1.870233 | 5.091435 | 0.024044294 | 1        | 15  | 10  | 8   | 11  | 4   | 6   | 2   |
| Tubb4a    | -1.394338 | 6.835143 | 4.481833 | 0.034256968 | 1        | 2   | 6   | 2   | 8   | 1   | 3   | 1   |
| Ptgd5     | -1.387065 | 10.45326 | 6.03753  | 0.014004864 | 1        | 365 | 435 | 147 | 350 | 157 | 86  | 106 |
| Med12l    | -1.361376 | 3.721723 | 9.253247 | 0.002350782 | 1        | 25  | 24  | 15  | 14  | 4   | 6   | 14  |
| Als2      | -1.357341 | 2.369368 | 4.430122 | 0.035309979 | 1        | 9   | 16  | 3   | 3   | 2   | 2   | 5   |
| Snx32     | -1.355779 | 5.385438 | 7.613716 | 0.005792599 | 1        | 9   | 11  | 3   | 15  | 4   | 3   | 4   |
| Trim36    | -1.346483 | 5.985265 | 6.395613 | 0.011440273 | 1        | 14  | 10  | 4   | 2   | 2   | 0   | 7   |
| Slc15a2   | -1.337716 | 4.102183 | 5.410738 | 0.020013252 | 1        | 139 | 53  | 94  | 162 | 3   | 51  | 98  |
| Pld5      | -1.333962 | 5.621073 | 6.576537 | 0.010333172 | 1        | 21  | 24  | 3   | 16  | 7   | 6   | 5   |
| 170009910 | -1.321838 | 1.585695 | 4.93024  | 0.026390658 | 1        | 19  | 24  | 27  | 28  | 10  | 11  | 8   |
| Atp2b2    | -1.317997 | 6.9242   | 3.895509 | 0.04841536  | 1        | 5   | 6   | 1   | 5   | 0   | 3   | 2   |
| Ildr2     | -1.308009 | 3.712202 | 4.182585 | 0.040841365 | 1        | 7   | 6   | 0   | 10  | 0   | 1   | 6   |
| Nmb       | -1.278681 | 6.106419 | 6.035499 | 0.01402099  | 1        | 8   | 5   | 3   | 13  | 1   | 1   | 7   |
| Klc3      | -1.278633 | 0.790103 | 4.090128 | 0.043134385 | 1        | 12  | 10  | 13  | 8   | 8   | 4   | 1   |
| Car15     | -1.24931  | 1.974369 | 3.964759 | 0.046462171 | 1        | 5   | 12  | 5   | 7   | 2   | 3   | 4   |
| Gm36582   | -1.248781 | 5.137063 | 4.252924 | 0.039182818 | 1        | 175 | 269 | 202 | 238 | 0   | 115 | 191 |
| Tet1      | -1.246103 | 3.409714 | 7.408214 | 0.006492675 | 1        | 14  | 16  | 11  | 16  | 5   | 1   | 13  |
| Reep2     | -1.234346 | 5.65528  | 3.903064 | 0.048198121 | 1        | 9   | 4   | 2   | 4   | 0   | 3   | 3   |
| Prrg1     | -1.202646 | 2.898797 | 4.106843 | 0.04271002  | 1        | 11  | 8   | 5   | 1   | 4   | 4   | 0   |
| Reln      | -1.201857 | 5.128322 | 8.035656 | 0.00458654  | 1        | 24  | 20  | 3   | 14  | 8   | 10  | 1   |
| Zfp382    | -1.193781 | 4.351185 | 6.164743 | 0.013032128 | 1        | 12  | 16  | 6   | 8   | 5   | 1   | 8   |
| Tmem45a   | -1.181198 | 3.921098 | 6.4292   | 0.011225914 | 1        | 20  | 21  | 42  | 53  | 11  | 14  | 23  |
| Gm35260   | -1.170477 | 1.892179 | 5.567062 | 0.018301444 | 1        | 15  | 28  | 11  | 25  | 11  | 4   | 11  |
| Stmn3     | -1.169254 | 9.277166 | 6.54472  | 0.01051959  | 1        | 7   | 10  | 6   | 13  | 5   | 4   | 3   |
| Helq      | -1.158098 | 1.819247 | 6.88186  | 0.00870749  | 1        | 18  | 14  | 11  | 23  | 6   | 9   | 7   |
| Sema6a    | -1.152347 | 4.925386 | 6.662706 | 0.00984513  | 1        | 14  | 20  | 7   | 19  | 12  | 1   | 7   |
| Plxnd1    | -1.150817 | 4.563334 | 5.168341 | 0.023002178 | 1        | 4   | 11  | 3   | 15  | 1   | 5   | 5   |
| Slc2a3    | -1.129727 | 3.92486  | 4.902237 | 0.026821928 | 1        | 12  | 8   | 6   | 6   | 5   | 3   | 3   |
| Arhgef26  | -1.123143 | 2.956409 | 4.203688 | 0.040336174 | 1        | 19  | 19  | 5   | 11  | 6   | 3   | 10  |
| Tmem45b   | -1.120469 | 3.232846 | 4.08749  | 0.043201749 | 1        | 6   | 8   | 7   | 8   | 6   | 1   | 3   |
| Slc26a7   | -1.117466 | 2.764997 | 4.449965 | 0.034901952 | 1        | 13  | 63  | 18  | 46  | 26  | 8   | 9   |
| Gm38978   | -1.115509 | 1.444557 | 4.198833 | 0.040451799 | 1        | 32  | 53  | 13  | 27  | 8   | 17  | 16  |
| 2900076Aa | -1.095626 | 1.914312 | 4.136733 | 0.041962073 | 1        | 21  | 25  | 7   | 16  | 11  | 6   | 6   |
| Fxyd6     | -1.095568 | 6.311253 | 10.01024 | 0.001556721 | 0.88998  | 9   | 33  | 21  | 29  | 10  | 11  | 11  |
| Arhgap31  | -1.083514 | 4.497926 | 4.083274 | 0.04330966  | 1        | 4   | 10  | 17  | 16  | 6   | 5   | 6   |
| C1qa      | -1.070564 | 3.70672  | 4.923373 | 0.026495734 | 1        | 10  | 15  | 9   | 16  | 7   | 3   | 8   |
| A530001N  | -1.066277 | 1.049845 | 4.35845  | 0.03682579  | 1        | 9   | 27  | 9   | 17  | 9   | 6   | 6   |
| Dhdh      | -1.061721 | 3.122685 | 8.154167 | 0.004296233 | 1        | 26  | 25  | 20  | 20  | 10  | 12  | 11  |
| Cidea     | -1.060547 | 3.843303 | 5.145289 | 0.023309535 | 1        | 10  | 15  | 18  | 26  | 9   | 7   | 9   |
| Hist1h1c  | -1.046683 | 2.960584 | 4.540079 | 0.033110071 | 1        | 44  | 68  | 35  | 39  | 39  | 13  | 11  |
| Fmo2      | -1.045564 | 3.004302 | 4.869651 | 0.027333029 | 1        | 32  | 21  | 15  | 42  | 14  | 8   | 19  |
| Senp3     | -1.027998 | 3.853395 | 8.20275  | 0.004182694 | 1        | 45  | 76  | 26  | 45  | 30  | 18  | 19  |
| Subg2     | -1.024843 | 4.790474 | 4.841684 | 0.027779751 | 1        | 5   | 13  | 7   | 10  | 5   | 1   | 7   |
| LOC10816f | -1.024246 | 2.294267 | 6.550246 | 0.010486967 | 1        | 43  | 40  | 31  | 69  | 18  | 27  | 20  |
| Nfatc4    | -1.008995 | 2.469072 | 8.176806 | 0.00424294  | 1        | 28  | 37  | 16  | 42  | 15  | 10  | 21  |

|           |           |          |          |             |          |     |     |     |     |     |     |     |
|-----------|-----------|----------|----------|-------------|----------|-----|-----|-----|-----|-----|-----|-----|
| Exosc9    | -1.008786 | 2.415114 | 4.421068 | 0.035497815 | 1        | 16  | 15  | 21  | 24  | 13  | 9   | 6   |
| Cmtm3     | -0.990962 | 2.431937 | 3.969338 | 0.046335976 | 1        | 8   | 18  | 2   | 24  | 6   | 4   | 9   |
| Cdk5r1    | -0.987324 | 6.182848 | 7.9592   | 0.004784354 | 1        | 14  | 21  | 17  | 16  | 9   | 8   | 9   |
| Mthfd1l   | -0.984696 | 3.408463 | 4.278939 | 0.038587431 | 1        | 7   | 19  | 7   | 10  | 1   | 2   | 14  |
| Haus7     | -0.971977 | 2.401448 | 4.754691 | 0.029218544 | 1        | 17  | 35  | 24  | 39  | 16  | 10  | 18  |
| Gas2      | -0.970317 | 3.625374 | 4.20043  | 0.040413738 | 1        | 15  | 21  | 17  | 9   | 10  | 3   | 12  |
| Dhx37     | -0.968555 | 2.824659 | 5.054239 | 0.024565773 | 1        | 31  | 26  | 24  | 16  | 11  | 6   | 24  |
| P3h3      | -0.966036 | 3.05859  | 3.855064 | 0.049596034 | 1        | 27  | 34  | 28  | 18  | 17  | 4   | 24  |
| Abca8a    | -0.965512 | 6.28091  | 4.255553 | 0.039122216 | 1        | 9   | 8   | 13  | 3   | 3   | 2   | 8   |
| Synm      | -0.960343 | 8.015117 | 11.81895 | 0.00058631  | 0.632525 | 23  | 51  | 4   | 40  | 17  | 8   | 20  |
| Nrxn2     | -0.959161 | 7.825502 | 4.748571 | 0.029322632 | 1        | 12  | 10  | 6   | 8   | 3   | 5   | 6   |
| Smyd5     | -0.956052 | 3.374024 | 5.048148 | 0.024652268 | 1        | 12  | 28  | 18  | 16  | 13  | 8   | 7   |
| Cntn1     | -0.947473 | 8.846069 | 5.856787 | 0.015517097 | 1        | 12  | 14  | 6   | 17  | 6   | 9   | 4   |
| Smarcd1   | -0.946485 | 4.170431 | 9.540264 | 0.002010129 | 0.981214 | 31  | 26  | 23  | 52  | 14  | 8   | 32  |
| Fxyd1     | -0.93513  | 6.543698 | 4.657747 | 0.030913727 | 1        | 8   | 14  | 10  | 6   | 9   | 2   | 4   |
| Pik3cd    | -0.922791 | 4.698176 | 5.944814 | 0.014760645 | 1        | 15  | 20  | 10  | 23  | 11  | 5   | 11  |
| Cdca7l    | -0.922572 | 2.440866 | 4.205877 | 0.040284137 | 1        | 30  | 42  | 29  | 47  | 22  | 15  | 21  |
| C1ra      | -0.91671  | 2.751836 | 5.463277 | 0.019420198 | 1        | 27  | 42  | 20  | 26  | 9   | 16  | 21  |
| Dgki      | -0.906492 | 6.654007 | 4.847338 | 0.027688835 | 1        | 7   | 22  | 6   | 7   | 1   | 4   | 12  |
| Cep112    | -0.904157 | 3.529165 | 8.298405 | 0.003967992 | 1        | 24  | 26  | 26  | 36  | 17  | 5   | 25  |
| Pced1a    | -0.899557 | 4.022551 | 7.662507 | 0.005638011 | 1        | 45  | 36  | 30  | 45  | 17  | 18  | 30  |
| LOC102631 | -0.89926  | 2.825797 | 4.835558 | 0.027878621 | 1        | 47  | 60  | 38  | 58  | 14  | 32  | 36  |
| Rcn3      | -0.889002 | 4.523314 | 8.831834 | 0.002960208 | 1        | 33  | 49  | 45  | 69  | 32  | 21  | 26  |
| Arhgef11  | -0.887411 | 3.363863 | 6.538287 | 0.010557695 | 1        | 22  | 48  | 24  | 47  | 18  | 11  | 29  |
| B3galt4   | -0.883124 | 3.098592 | 4.686815 | 0.030394941 | 1        | 14  | 39  | 17  | 43  | 15  | 16  | 12  |
| Tspyl2    | -0.881945 | 4.355604 | 7.06859  | 0.007844697 | 1        | 18  | 40  | 22  | 28  | 19  | 17  | 6   |
| Dclre1a   | -0.874178 | 3.780647 | 7.730614 | 0.005429229 | 1        | 62  | 100 | 49  | 49  | 31  | 31  | 45  |
| Traf3ip1  | -0.856414 | 3.032847 | 6.418102 | 0.011296284 | 1        | 28  | 27  | 18  | 29  | 15  | 10  | 18  |
| Ltb4r1    | -0.854469 | 3.36368  | 6.650487 | 0.009912871 | 1        | 66  | 87  | 54  | 60  | 41  | 33  | 35  |
| Aak1      | -0.85249  | 5.144567 | 4.941175 | 0.026224204 | 1        | 25  | 20  | 23  | 23  | 8   | 15  | 16  |
| Atp1a2    | -0.836403 | 8.523142 | 4.583748 | 0.032276537 | 1        | 81  | 70  | 42  | 64  | 25  | 42  | 40  |
| Cers4     | -0.826826 | 6.199799 | 7.969291 | 0.004757758 | 1        | 12  | 29  | 25  | 29  | 16  | 6   | 19  |
| Cp        | -0.821562 | 6.10463  | 6.919485 | 0.008526153 | 1        | 33  | 39  | 23  | 22  | 19  | 18  | 12  |
| Gnao1     | -0.818113 | 8.948373 | 4.850863 | 0.027632309 | 1        | 23  | 25  | 16  | 35  | 12  | 17  | 12  |
| Zfp90     | -0.807999 | 3.861119 | 7.932958 | 0.004854238 | 1        | 50  | 80  | 40  | 58  | 28  | 28  | 42  |
| Gm8995    | -0.794181 | 4.398639 | 5.665148 | 0.017305255 | 1        | 85  | 104 | 59  | 109 | 55  | 53  | 37  |
| Prune2    | -0.788961 | 9.122257 | 5.600054 | 0.01795992  | 1        | 26  | 17  | 10  | 22  | 11  | 9   | 13  |
| Iqgap2    | -0.784028 | 4.290936 | 5.264045 | 0.021770362 | 1        | 47  | 84  | 38  | 57  | 20  | 28  | 53  |
| Cstf2     | -0.778865 | 4.791241 | 9.307179 | 0.002282576 | 1        | 86  | 93  | 77  | 79  | 45  | 41  | 66  |
| Trub2     | -0.77386  | 4.366531 | 8.519825 | 0.003512983 | 1        | 45  | 71  | 39  | 84  | 33  | 21  | 53  |
| Ccdc92    | -0.772854 | 7.722905 | 6.669805 | 0.009805992 | 1        | 28  | 18  | 19  | 33  | 17  | 9   | 18  |
| Brca2     | -0.770554 | 3.551933 | 4.039749 | 0.044440438 | 1        | 72  | 114 | 31  | 69  | 43  | 16  | 71  |
| Col6a2    | -0.767666 | 5.148259 | 5.137012 | 0.023420928 | 1        | 143 | 297 | 175 | 121 | 143 | 71  | 107 |
| Mtrf1l    | -0.756838 | 3.457557 | 5.116807 | 0.02369518  | 1        | 27  | 35  | 38  | 48  | 19  | 24  | 23  |
| Fam73a    | -0.753107 | 6.096133 | 6.170454 | 0.012990124 | 1        | 20  | 35  | 11  | 17  | 7   | 16  | 14  |
| Fastkd2   | -0.751983 | 3.717427 | 5.914142 | 0.01501982  | 1        | 36  | 34  | 27  | 27  | 14  | 14  | 30  |
| Mpdu1     | -0.751346 | 3.51732  | 5.216388 | 0.022374985 | 1        | 68  | 48  | 28  | 63  | 28  | 25  | 41  |
| LOC105244 | -0.751056 | 4.18189  | 8.103761 | 0.00441735  | 1        | 117 | 92  | 95  | 103 | 45  | 54  | 95  |
| Slc24a3   | -0.750838 | 5.563742 | 3.850637 | 0.04972709  | 1        | 20  | 21  | 5   | 51  | 16  | 9   | 17  |
| Lrrc17    | -0.744564 | 10.97108 | 8.117709 | 0.004383491 | 1        | 117 | 207 | 112 | 144 | 95  | 68  | 92  |
| Rnaseh2b  | -0.740538 | 4.373576 | 6.868665 | 0.003205466 | 1        | 89  | 150 | 72  | 138 | 66  | 50  | 84  |
| Mtssl1    | -0.738218 | 5.324729 | 5.438186 | 0.019701118 | 1        | 22  | 19  | 19  | 37  | 15  | 13  | 16  |
| Sgtb      | -0.736109 | 5.164139 | 4.39208  | 0.036106238 | 1        | 11  | 16  | 12  | 20  | 8   | 6   | 13  |
| Plcxd2    | -0.727828 | 5.416823 | 5.458009 | 0.019478832 | 1        | 24  | 14  | 22  | 33  | 18  | 4   | 22  |
| Dis3l2    | -0.711794 | 3.840535 | 5.885562 | 0.015265521 | 1        | 59  | 57  | 43  | 62  | 23  | 34  | 47  |
| Dctn1     | -0.711772 | 6.0518   | 6.525638 | 0.010633041 | 1        | 199 | 230 | 125 | 157 | 126 | 82  | 115 |
| Rel       | -0.711214 | 3.703174 | 4.24958  | 0.039260041 | 1        | 83  | 95  | 55  | 120 | 66  | 37  | 55  |
| Stk39     | -0.708206 | 7.531603 | 5.817038 | 0.01587165  | 1        | 28  | 26  | 25  | 34  | 14  | 17  | 22  |
| Chek2     | -0.706733 | 3.494383 | 5.371696 | 0.020466065 | 1        | 92  | 99  | 56  | 91  | 29  | 52  | 79  |
| Morc4     | -0.704247 | 3.733463 | 5.784582 | 0.016167345 | 1        | 34  | 39  | 22  | 38  | 22  | 14  | 26  |
| Cd59a     | -0.702143 | 7.789429 | 13.37174 | 0.000255445 | 0.509334 | 149 | 318 | 179 | 375 | 164 | 104 | 199 |
| Matn4     | -0.70008  | 5.994897 | 4.480474 | 0.03428421  | 1        | 158 | 245 | 154 | 109 | 134 | 50  | 137 |
| Oaz2      | -0.691865 | 6.805707 | 13.34148 | 0.000259599 | 0.509334 | 120 | 181 | 108 | 166 | 78  | 85  | 102 |
| Nup98     | -0.691832 | 2.946886 | 3.922022 | 0.047657517 | 1        | 51  | 52  | 26  | 47  | 26  | 29  | 24  |
| 1110012L1 | -0.690852 | 3.538918 | 4.466876 | 0.034558115 | 1        | 22  | 46  | 17  | 33  | 20  | 13  | 21  |
| Pstk      | -0.686097 | 3.710446 | 4.793903 | 0.028560639 | 1        | 35  | 53  | 36  | 62  | 19  | 21  | 51  |
| Gas2l3    | -0.685117 | 6.080801 | 6.481223 | 0.010901994 | 1        | 72  | 62  | 77  | 68  | 50  | 25  | 65  |
| Cyp2j9    | -0.678762 | 4.264795 | 3.983359 | 0.045951852 | 1        | 16  | 31  | 19  | 35  | 25  | 6   | 16  |
| Wdr60     | -0.675436 | 4.626401 | 6.299941 | 0.012074196 | 1        | 75  | 75  | 62  | 102 | 50  | 45  | 52  |
| Map1a     | -0.672544 | 10.33004 | 8.69771  | 0.003186102 | 1        | 36  | 58  | 46  | 38  | 37  | 24  | 23  |
| Kansl1l   | -0.672495 | 4.738701 | 9.030905 | 0.002654531 | 1        | 151 | 164 | 87  | 192 | 76  | 92  | 107 |
| Ccdc18    | -0.671601 | 3.621202 | 4.568822 | 0.032558941 | 1        | 99  | 111 | 72  | 112 | 78  | 54  | 45  |
| Sestd1    | -0.671306 | 5.462496 | 5.144227 | 0.023323787 | 1        | 25  | 36  | 19  | 26  | 22  | 11  | 17  |
| Bach2     | -0.669593 | 4.287879 | 4.777747 | 0.028829809 | 1        | 29  | 37  | 24  | 53  | 22  | 26  | 17  |

|           |           |          |          |             |          |     |     |     |     |     |     |     |
|-----------|-----------|----------|----------|-------------|----------|-----|-----|-----|-----|-----|-----|-----|
| S100a4    | -0.666837 | 5.38147  | 5.999012 | 0.014313891 | 1        | 24  | 63  | 20  | 29  | 22  | 5   | 39  |
| Rnf146    | -0.665087 | 3.190881 | 3.94552  | 0.046996335 | 1        | 31  | 42  | 29  | 25  | 23  | 15  | 23  |
| Mars      | -0.664669 | 3.894934 | 4.44702  | 0.034962204 | 1        | 69  | 103 | 65  | 85  | 32  | 45  | 82  |
| Rnf215    | -0.660582 | 4.069646 | 4.709391 | 0.029998275 | 1        | 32  | 67  | 32  | 47  | 27  | 30  | 24  |
| Lsm14b    | -0.660025 | 5.561882 | 4.251528 | 0.039215027 | 1        | 216 | 96  | 57  | 180 | 76  | 73  | 118 |
| Mtmr9     | -0.659141 | 3.815663 | 5.447074 | 0.019601133 | 1        | 54  | 84  | 30  | 49  | 25  | 24  | 57  |
| Naip1     | -0.654691 | 4.308703 | 4.335675 | 0.03732161  | 1        | 73  | 180 | 64  | 105 | 51  | 51  | 99  |
| LOC102631 | -0.652547 | 3.95134  | 7.122992 | 0.007610158 | 1        | 44  | 76  | 44  | 76  | 36  | 33  | 45  |
| Dennd4c   | -0.648749 | 3.810576 | 5.264056 | 0.021770229 | 1        | 89  | 103 | 93  | 102 | 67  | 61  | 55  |
| Ece2      | -0.646172 | 4.494542 | 6.359139 | 0.01167782  | 1        | 36  | 47  | 34  | 39  | 22  | 23  | 31  |
| Gsdmd     | -0.642947 | 2.362274 | 4.076989 | 0.043471051 | 1        | 23  | 40  | 23  | 37  | 19  | 20  | 19  |
| Pitrm1    | -0.639371 | 4.173496 | 5.276008 | 0.021621271 | 1        | 50  | 76  | 31  | 74  | 32  | 41  | 33  |
| Utp20     | -0.633775 | 4.632107 | 6.847199 | 0.008878036 | 1        | 137 | 155 | 91  | 153 | 81  | 73  | 106 |
| Ttl4      | -0.632131 | 3.096305 | 3.902414 | 0.048216778 | 1        | 51  | 77  | 44  | 34  | 32  | 22  | 50  |
| Slc16a1   | -0.625058 | 5.682956 | 5.926557 | 0.014914351 | 1        | 34  | 31  | 13  | 52  | 10  | 16  | 39  |
| Hemk1     | -0.619927 | 3.649569 | 4.065249 | 0.043774242 | 1        | 39  | 44  | 30  | 40  | 25  | 28  | 20  |
| Vars2     | -0.619249 | 4.5363   | 6.054935 | 0.013867487 | 1        | 98  | 110 | 77  | 100 | 66  | 37  | 94  |
| Slc4a1ap  | -0.614905 | 5.436537 | 12.8561  | 0.00033638  | 0.526158 | 152 | 202 | 114 | 191 | 79  | 104 | 142 |
| Trmt1     | -0.609874 | 4.899097 | 7.803116 | 0.005215621 | 1        | 102 | 128 | 50  | 84  | 61  | 44  | 74  |
| Copg2     | -0.609572 | 4.662087 | 6.201098 | 0.012767111 | 1        | 143 | 175 | 112 | 176 | 98  | 71  | 136 |
| Ccdc112   | -0.602227 | 4.511569 | 5.44408  | 0.019634755 | 1        | 63  | 93  | 60  | 62  | 45  | 34  | 62  |
| Kbtbd11   | -0.595679 | 5.002706 | 6.262085 | 0.012334898 | 1        | 72  | 65  | 49  | 82  | 42  | 28  | 69  |
| Cap1      | -0.593544 | 5.471359 | 7.548758 | 0.006005144 | 1        | 201 | 256 | 134 | 221 | 162 | 104 | 125 |
| Anln      | -0.585492 | 4.610141 | 3.96723  | 0.046394034 | 1        | 118 | 184 | 114 | 193 | 104 | 51  | 165 |
| LOC101051 | -0.583494 | 3.990286 | 4.534448 | 0.033219168 | 1        | 145 | 139 | 94  | 170 | 52  | 106 | 117 |
| Sema3b    | -0.581105 | 6.56736  | 5.712368 | 0.016845801 | 1        | 21  | 49  | 18  | 49  | 14  | 22  | 33  |
| B230206H1 | -0.571895 | 5.138302 | 4.156819 | 0.0414672   | 1        | 24  | 74  | 23  | 28  | 18  | 14  | 45  |
| BC005537  | -0.569954 | 6.20829  | 10.71853 | 0.00106068  | 0.719982 | 213 | 287 | 156 | 270 | 118 | 151 | 198 |
| Asap2     | -0.567377 | 4.815517 | 6.586766 | 0.010273966 | 1        | 148 | 191 | 119 | 164 | 102 | 103 | 103 |
| Fam213a   | -0.567049 | 5.517966 | 6.031953 | 0.014049181 | 1        | 39  | 71  | 49  | 70  | 44  | 26  | 47  |
| 2810006K2 | -0.566127 | 4.226647 | 4.826865 | 0.028019534 | 1        | 33  | 71  | 38  | 79  | 26  | 29  | 59  |
| Map1b     | -0.565117 | 12.64239 | 5.587258 | 0.018091591 | 1        | 98  | 153 | 77  | 132 | 76  | 68  | 84  |
| Bud13     | -0.562446 | 3.709329 | 5.660544 | 0.017350744 | 1        | 47  | 85  | 58  | 92  | 47  | 35  | 63  |
| Clcc1     | -0.562031 | 4.656005 | 6.547561 | 0.010502801 | 1        | 121 | 157 | 92  | 156 | 79  | 62  | 135 |
| Hist1h1e  | -0.559398 | 6.244754 | 5.8548   | 0.015534619 | 1        | 511 | 731 | 426 | 437 | 406 | 309 | 325 |
| Ncoa7     | -0.558067 | 7.911115 | 4.084641 | 0.043274635 | 1        | 23  | 28  | 38  | 25  | 22  | 15  | 23  |
| Cdc25b    | -0.557965 | 3.745875 | 4.521795 | 0.033465694 | 1        | 80  | 80  | 74  | 90  | 44  | 46  | 84  |
| Maoa      | -0.552277 | 5.553135 | 9.317795 | 0.002269389 | 1        | 89  | 99  | 60  | 119 | 66  | 44  | 80  |
| Ccdc34    | -0.552266 | 6.068548 | 7.616469 | 0.005783761 | 1        | 239 | 345 | 232 | 307 | 221 | 144 | 206 |
| Ppargc1b  | -0.551443 | 4.939043 | 4.299028 | 0.038134167 | 1        | 69  | 107 | 55  | 72  | 31  | 47  | 82  |
| Dgat1     | -0.547284 | 4.354789 | 6.443619 | 0.011135156 | 1        | 69  | 71  | 67  | 101 | 54  | 43  | 64  |
| Nufip1    | -0.543619 | 4.14796  | 4.239041 | 0.03950447  | 1        | 59  | 76  | 42  | 62  | 33  | 31  | 63  |
| Ggact     | -0.539955 | 5.739192 | 4.694746 | 0.03025497  | 1        | 56  | 130 | 69  | 82  | 61  | 43  | 69  |
| Ndr4      | -0.527789 | 9.467668 | 4.136967 | 0.041956269 | 1        | 32  | 53  | 24  | 51  | 24  | 17  | 44  |
| Pdzd11    | -0.527659 | 5.584146 | 9.779172 | 0.001764998 | 0.920255 | 150 | 217 | 129 | 175 | 122 | 100 | 124 |
| Rabl3     | -0.524585 | 3.923256 | 3.947007 | 0.046954812 | 1        | 28  | 41  | 26  | 48  | 22  | 18  | 36  |
| Taf7      | -0.524396 | 4.634184 | 6.027582 | 0.014084013 | 1        | 65  | 80  | 53  | 94  | 34  | 38  | 87  |
| Wdr13     | -0.520526 | 5.89094  | 7.178496 | 0.007378253 | 1        | 151 | 218 | 129 | 211 | 97  | 117 | 157 |
| Fam83b    | -0.520287 | 4.016422 | 4.284136 | 0.03846962  | 1        | 104 | 183 | 114 | 154 | 100 | 85  | 99  |
| Lmbrd2    | -0.518298 | 5.969409 | 5.822525 | 0.015822217 | 1        | 97  | 192 | 82  | 138 | 93  | 49  | 128 |
| Cep89     | -0.514367 | 3.761765 | 5.099372 | 0.023934502 | 1        | 72  | 81  | 53  | 93  | 55  | 33  | 73  |
| Tamm41    | -0.513871 | 4.346171 | 3.86033  | 0.049440615 | 1        | 55  | 103 | 36  | 82  | 26  | 42  | 79  |
| Eif1b     | -0.509847 | 7.954032 | 7.541539 | 0.006029251 | 1        | 83  | 132 | 89  | 110 | 66  | 52  | 107 |
| Nr2c2     | -0.506157 | 5.815329 | 7.652295 | 0.005670016 | 1        | 154 | 217 | 108 | 195 | 92  | 121 | 137 |
| Slc35c2   | -0.498616 | 5.196567 | 4.946347 | 0.026145854 | 1        | 87  | 125 | 103 | 174 | 74  | 93  | 87  |
| Gm10516   | -0.484943 | 3.740162 | 4.127382 | 0.042194583 | 1        | 54  | 62  | 33  | 67  | 40  | 33  | 42  |
| Bcs1l     | -0.481712 | 4.360481 | 4.626864 | 0.031475047 | 1        | 50  | 94  | 62  | 72  | 44  | 41  | 67  |
| Pik3r2    | -0.477468 | 5.430861 | 8.712154 | 0.003160955 | 1        | 173 | 261 | 142 | 205 | 111 | 101 | 225 |
| Mrpl16    | -0.476071 | 5.087278 | 5.702249 | 0.016943188 | 1        | 83  | 136 | 60  | 152 | 73  | 57  | 101 |
| Crybg3    | -0.475013 | 6.512589 | 11.05838 | 0.000882873 | 0.679882 | 666 | 813 | 496 | 771 | 460 | 440 | 573 |
| Ndufaf2   | -0.472227 | 5.109978 | 5.532414 | 0.01866733  | 1        | 74  | 102 | 45  | 85  | 55  | 38  | 74  |
| Zfhx2     | -0.468958 | 5.312342 | 5.815999 | 0.015881029 | 1        | 78  | 110 | 68  | 109 | 62  | 50  | 89  |
| Abcf2     | -0.467914 | 5.014807 | 5.950174 | 0.014715832 | 1        | 101 | 108 | 64  | 102 | 69  | 63  | 70  |
| Pds5b     | -0.467643 | 6.236988 | 7.374572 | 0.006615255 | 1        | 162 | 212 | 172 | 205 | 122 | 139 | 146 |
| Nek4      | -0.467184 | 5.137966 | 5.580092 | 0.018165771 | 1        | 89  | 120 | 74  | 131 | 48  | 74  | 106 |
| Ogfod1    | -0.464704 | 4.834745 | 4.022715 | 0.044891402 | 1        | 96  | 101 | 51  | 86  | 58  | 49  | 76  |
| Smim13    | -0.459837 | 6.171104 | 4.731093 | 0.029622062 | 1        | 84  | 74  | 34  | 74  | 44  | 30  | 76  |
| Tnks      | -0.458392 | 5.426166 | 4.352681 | 0.036950734 | 1        | 109 | 138 | 65  | 116 | 65  | 83  | 79  |
| Papolg    | -0.452991 | 4.354741 | 4.462471 | 0.034647344 | 1        | 123 | 131 | 66  | 112 | 54  | 65  | 127 |
| Atf5      | -0.452375 | 6.008625 | 4.845818 | 0.027713248 | 1        | 170 | 187 | 99  | 119 | 107 | 81  | 132 |
| Cdkal1    | -0.451455 | 4.819207 | 4.242333 | 0.039427955 | 1        | 89  | 165 | 135 | 178 | 105 | 96  | 106 |
| Tcof1     | -0.450782 | 6.014039 | 8.174012 | 0.00424948  | 1        | 192 | 305 | 210 | 298 | 167 | 141 | 257 |
| Golim4    | -0.449417 | 6.767376 | 8.046351 | 0.004559541 | 1        | 395 | 497 | 303 | 377 | 319 | 239 | 295 |
| Znhit6    | -0.447956 | 5.371429 | 7.904267 | 0.004931833 | 1        | 165 | 258 | 146 | 223 | 121 | 130 | 186 |

|           |           |          |          |             |   |      |      |      |      |      |      |      |
|-----------|-----------|----------|----------|-------------|---|------|------|------|------|------|------|------|
| Vipas39   | -0.447241 | 5.2917   | 5.074813 | 0.02427589  | 1 | 96   | 123  | 75   | 120  | 63   | 57   | 115  |
| Jmjd1c    | -0.446266 | 6.626456 | 9.036222 | 0.00264682  | 1 | 561  | 794  | 458  | 621  | 409  | 383  | 551  |
| Dtd1      | -0.445946 | 4.975229 | 5.014284 | 0.025139029 | 1 | 77   | 90   | 63   | 104  | 66   | 37   | 86   |
| Alg11     | -0.443907 | 5.368718 | 5.219924 | 0.022329532 | 1 | 85   | 157  | 84   | 177  | 95   | 73   | 104  |
| Rbm10     | -0.442249 | 5.496647 | 6.263399 | 0.012325748 | 1 | 179  | 248  | 104  | 193  | 126  | 110  | 159  |
| Maf       | -0.441628 | 7.197622 | 5.425961 | 0.019839514 | 1 | 69   | 92   | 48   | 84   | 51   | 44   | 68   |
| Rab11fip2 | -0.439355 | 6.325878 | 9.014393 | 0.002678618 | 1 | 190  | 211  | 161  | 233  | 135  | 146  | 158  |
| Tenm3     | -0.435002 | 5.682748 | 4.080931 | 0.043369756 | 1 | 87   | 115  | 103  | 82   | 69   | 73   | 75   |
| Agtpbp1   | -0.430124 | 7.57473  | 5.551015 | 0.018469976 | 1 | 72   | 99   | 42   | 100  | 56   | 43   | 76   |
| Nfkbib    | -0.422779 | 5.835155 | 6.493994 | 0.010823953 | 1 | 130  | 236  | 153  | 252  | 126  | 118  | 191  |
| Git1      | -0.419121 | 5.777417 | 4.235378 | 0.039589813 | 1 | 87   | 160  | 94   | 135  | 63   | 53   | 169  |
| Uimc1     | -0.411973 | 4.783683 | 4.283126 | 0.038492502 | 1 | 97   | 191  | 106  | 159  | 71   | 87   | 162  |
| Lnp       | -0.411203 | 5.793984 | 5.251812 | 0.021923927 | 1 | 85   | 107  | 63   | 109  | 72   | 60   | 72   |
| Plcb3     | -0.403692 | 6.045386 | 4.419193 | 0.03553683  | 1 | 216  | 303  | 157  | 191  | 172  | 112  | 216  |
| Klc2      | -0.401656 | 7.232528 | 3.911893 | 0.047945551 | 1 | 65   | 125  | 46   | 82   | 66   | 51   | 58   |
| Dmx11     | -0.400058 | 5.756127 | 4.224188 | 0.039851675 | 1 | 208  | 227  | 170  | 198  | 135  | 121  | 221  |
| Ttc4      | -0.399588 | 5.397153 | 4.82935  | 0.027979176 | 1 | 107  | 174  | 116  | 117  | 89   | 71   | 143  |
| Cdadc1    | -0.395995 | 5.88978  | 5.407333 | 0.020052328 | 1 | 155  | 214  | 119  | 188  | 104  | 110  | 177  |
| Peli2     | -0.392871 | 5.720375 | 5.007916 | 0.025231657 | 1 | 119  | 201  | 93   | 162  | 98   | 71   | 167  |
| Cd63      | -0.392374 | 7.375539 | 4.220667 | 0.039934451 | 1 | 194  | 267  | 156  | 189  | 143  | 159  | 146  |
| Ncoa5     | -0.391617 | 5.057361 | 4.21621  | 0.040039495 | 1 | 126  | 172  | 84   | 138  | 86   | 79   | 136  |
| Slc25a28  | -0.390849 | 4.725609 | 4.045954 | 0.044277357 | 1 | 72   | 99   | 62   | 96   | 55   | 61   | 72   |
| Cpq       | -0.389714 | 4.360329 | 4.543104 | 0.033051604 | 1 | 111  | 133  | 90   | 109  | 87   | 59   | 115  |
| Pum3      | -0.389398 | 6.460343 | 9.237641 | 0.002370902 | 1 | 283  | 397  | 216  | 340  | 200  | 196  | 321  |
| Tmem256   | -0.388924 | 6.461298 | 5.725373 | 0.016721484 | 1 | 180  | 336  | 174  | 383  | 217  | 144  | 243  |
| Farsa     | -0.384053 | 6.346672 | 5.07852  | 0.024224033 | 1 | 302  | 409  | 175  | 387  | 201  | 201  | 328  |
| Tfe3      | -0.381101 | 5.015999 | 4.598971 | 0.03199115  | 1 | 89   | 113  | 66   | 92   | 58   | 66   | 85   |
| Dffa      | -0.379522 | 6.229016 | 5.20181  | 0.022563377 | 1 | 92   | 134  | 86   | 123  | 79   | 65   | 111  |
| Nsrp1     | -0.379322 | 6.461606 | 5.566487 | 0.018307457 | 1 | 343  | 507  | 295  | 424  | 313  | 242  | 342  |
| Cast      | -0.377144 | 8.755898 | 5.901408 | 0.015128788 | 1 | 2223 | 3319 | 1883 | 2855 | 2025 | 1741 | 1969 |
| Aarsd1    | -0.372794 | 5.503402 | 5.075011 | 0.02427312  | 1 | 108  | 175  | 86   | 159  | 88   | 91   | 125  |
| Zmym4     | -0.363922 | 5.659438 | 5.732577 | 0.016653025 | 1 | 165  | 259  | 164  | 263  | 179  | 111  | 211  |
| Atp11b    | -0.360898 | 6.237763 | 4.707673 | 0.030028269 | 1 | 323  | 476  | 306  | 417  | 245  | 303  | 328  |
| Snrnp48   | -0.358701 | 6.523424 | 3.968538 | 0.046358006 | 1 | 268  | 405  | 286  | 318  | 207  | 228  | 327  |
| BC004004  | -0.357288 | 6.222737 | 4.874824 | 0.027251216 | 1 | 220  | 303  | 183  | 274  | 169  | 165  | 244  |
| Chd8      | -0.356703 | 6.830674 | 4.196657 | 0.040503759 | 1 | 352  | 543  | 337  | 436  | 300  | 258  | 437  |
| Srcap     | -0.356559 | 5.144885 | 3.877542 | 0.048936156 | 1 | 175  | 194  | 125  | 150  | 125  | 106  | 151  |
| Tmed2     | -0.355556 | 6.785883 | 5.425723 | 0.019842221 | 1 | 436  | 712  | 310  | 602  | 388  | 310  | 489  |
| Uxs1      | -0.348398 | 5.682707 | 4.091751 | 0.043092975 | 1 | 106  | 142  | 109  | 150  | 94   | 73   | 141  |
| Zc3h13    | -0.347853 | 7.144206 | 5.030484 | 0.024904931 | 1 | 469  | 777  | 433  | 564  | 389  | 409  | 506  |
| Dohh      | -0.345265 | 6.093824 | 4.242181 | 0.039431149 | 1 | 130  | 222  | 132  | 166  | 109  | 109  | 171  |
| Tecr      | -0.34428  | 8.945805 | 6.825543 | 0.008986323 | 1 | 926  | 1233 | 839  | 1479 | 959  | 592  | 1123 |
| Tmem63b   | -0.335984 | 6.874256 | 4.747622 | 0.029338815 | 1 | 201  | 244  | 144  | 234  | 161  | 140  | 186  |
| Nbea      | -0.335783 | 5.770799 | 4.05747  | 0.043976329 | 1 | 272  | 312  | 210  | 314  | 190  | 213  | 254  |
| Atxn1     | -0.333562 | 5.931666 | 4.412659 | 0.0356732   | 1 | 163  | 222  | 167  | 260  | 120  | 102  | 296  |
| Smap2     | -0.331799 | 6.261361 | 4.334515 | 0.037347055 | 1 | 98   | 170  | 91   | 126  | 107  | 81   | 97   |
| Prrc2a    | -0.331653 | 6.972171 | 5.454705 | 0.019515698 | 1 | 448  | 635  | 318  | 516  | 389  | 346  | 365  |
| Rhog      | -0.32838  | 5.549142 | 4.7265   | 0.029701275 | 1 | 194  | 346  | 152  | 261  | 177  | 168  | 210  |
| Akt3      | -0.328299 | 6.472965 | 4.776876 | 0.028844398 | 1 | 133  | 173  | 105  | 161  | 114  | 92   | 138  |
| Stx4a     | -0.327644 | 6.121734 | 3.919079 | 0.047741039 | 1 | 250  | 324  | 200  | 338  | 190  | 215  | 251  |
| Nrp1      | -0.324577 | 6.896003 | 5.410397 | 0.020017162 | 1 | 163  | 257  | 127  | 204  | 153  | 117  | 178  |
| Stim2     | -0.323001 | 6.038974 | 4.155088 | 0.041509612 | 1 | 164  | 204  | 131  | 240  | 133  | 121  | 194  |
| Tars      | -0.322089 | 6.085929 | 3.895093 | 0.048427358 | 1 | 309  | 370  | 166  | 320  | 196  | 175  | 343  |
| Cep350    | -0.318206 | 6.65204  | 4.654652 | 0.030969505 | 1 | 469  | 655  | 395  | 542  | 406  | 357  | 467  |
| Golgb1    | -0.316706 | 7.695402 | 5.747019 | 0.016516656 | 1 | 862  | 1091 | 673  | 963  | 665  | 636  | 859  |
| Map2k7    | -0.315518 | 6.013556 | 4.681349 | 0.030491797 | 1 | 184  | 203  | 147  | 228  | 151  | 117  | 201  |
| Nsd1      | -0.31545  | 7.61032  | 6.17632  | 0.012947125 | 1 | 771  | 1027 | 611  | 965  | 595  | 621  | 802  |
| Mlec      | -0.314819 | 7.42985  | 5.386102 | 0.020297769 | 1 | 447  | 742  | 346  | 488  | 375  | 308  | 545  |
| Rassf3    | -0.313506 | 6.463374 | 6.00666  | 0.014251977 | 1 | 393  | 507  | 274  | 456  | 328  | 268  | 381  |
| Cpeb2     | -0.304627 | 6.55577  | 4.947853 | 0.026123087 | 1 | 401  | 500  | 284  | 455  | 300  | 308  | 377  |
| Tnks1bp1  | -0.301909 | 6.487916 | 4.216783 | 0.040025978 | 1 | 425  | 594  | 332  | 417  | 336  | 352  | 361  |
| Kans1     | -0.298903 | 5.617414 | 4.028833 | 0.04472888  | 1 | 156  | 252  | 185  | 206  | 136  | 145  | 217  |
| Nav1      | -0.297682 | 7.493915 | 5.787991 | 0.016136023 | 1 | 295  | 375  | 247  | 299  | 214  | 201  | 350  |
| Synj1     | -0.297559 | 7.745005 | 4.683057 | 0.0304615   | 1 | 143  | 199  | 137  | 203  | 111  | 134  | 175  |
| Rfk       | -0.295515 | 6.821858 | 4.323688 | 0.037585379 | 1 | 271  | 242  | 163  | 323  | 206  | 143  | 276  |
| Rsrc2     | -0.288915 | 7.597108 | 4.099635 | 0.042892473 | 1 | 652  | 1064 | 565  | 855  | 563  | 529  | 838  |
| Ankrd11   | -0.288123 | 8.92673  | 4.547042 | 0.032975674 | 1 | 1626 | 2131 | 1301 | 1695 | 1248 | 1185 | 1760 |
| Ubr5      | -0.287714 | 7.214105 | 5.205026 | 0.022521684 | 1 | 562  | 805  | 492  | 641  | 477  | 441  | 623  |
| Rc3h2     | -0.286219 | 6.747439 | 4.707809 | 0.030025893 | 1 | 298  | 414  | 244  | 418  | 269  | 228  | 349  |
| Ndufb10   | -0.28539  | 6.980168 | 4.09247  | 0.043074647 | 1 | 256  | 343  | 240  | 357  | 235  | 203  | 305  |
| Smarca5   | -0.280614 | 6.598426 | 5.271706 | 0.021674764 | 1 | 397  | 659  | 282  | 532  | 344  | 285  | 529  |
| Dnttip2   | -0.280428 | 5.969424 | 4.425048 | 0.035415114 | 1 | 216  | 317  | 162  | 329  | 222  | 139  | 274  |
| App1      | -0.276113 | 7.16362  | 4.514212 | 0.033614375 | 1 | 342  | 520  | 274  | 511  | 281  | 277  | 471  |
| Ralgapa1  | -0.274573 | 7.263433 | 4.420876 | 0.03550181  | 1 | 246  | 382  | 222  | 299  | 174  | 218  | 333  |



|         |           |          |          |             |   |      |      |      |      |      |      |      |
|---------|-----------|----------|----------|-------------|---|------|------|------|------|------|------|------|
| Ash1l   | -0.271494 | 8.049575 | 6.105575 | 0.013475613 | 1 | 981  | 1395 | 807  | 1355 | 821  | 776  | 1243 |
| Rsl1d1  | -0.267604 | 6.495591 | 4.001171 | 0.045468658 | 1 | 303  | 516  | 265  | 445  | 261  | 269  | 425  |
| C2cd2   | -0.264275 | 6.327821 | 4.280402 | 0.038554239 | 1 | 361  | 521  | 267  | 558  | 352  | 242  | 479  |
| Eea1    | -0.263685 | 8.05712  | 3.86682  | 0.049249763 | 1 | 600  | 970  | 525  | 704  | 528  | 480  | 748  |
| Prdm2   | -0.260171 | 6.742872 | 4.002103 | 0.045443532 | 1 | 368  | 428  | 296  | 442  | 310  | 264  | 398  |
| Fndc3a  | -0.259975 | 6.549559 | 4.054845 | 0.044044763 | 1 | 513  | 709  | 367  | 609  | 373  | 375  | 652  |
| Slk     | -0.254793 | 9.074764 | 4.286586 | 0.038414231 | 1 | 3020 | 4475 | 2524 | 3516 | 2548 | 2594 | 3239 |
| Dnajc21 | -0.245101 | 7.344042 | 4.433665 | 0.035236775 | 1 | 817  | 930  | 600  | 862  | 625  | 590  | 832  |
| Rexo2   | -0.243777 | 7.378526 | 4.060813 | 0.043889353 | 1 | 335  | 488  | 218  | 399  | 240  | 227  | 467  |
| Stx12   | -0.226439 | 7.144286 | 4.764586 | 0.029051046 | 1 | 315  | 414  | 250  | 382  | 238  | 260  | 386  |

---

**Table S2. Differentially expressed genes in the cornea of MS-CKO vs age- and sex-matched WT control mice.**

| Gene                     | log2FC | logCPM  | LR     | PValue | FDR    | WT1 | WT2 | Wt3 | Wt4 | WT5 | MS-CKO1 | MS-CKO2 | MS-CKO3 | MS-CKO4 | MS-CKO5 |
|--------------------------|--------|---------|--------|--------|--------|-----|-----|-----|-----|-----|---------|---------|---------|---------|---------|
| <b>Upregulated genes</b> |        |         |        |        |        |     |     |     |     |     |         |         |         |         |         |
| Gm16299                  | 5.18   | -0.1353 | 11.664 | 0.0006 | 0.1658 | 0   | 0   | 0   | 0   | 0   | 2       | 14      | 12      | 0       | 0       |
| Tssk2                    | 4.962  | -0.3226 | 11.2   | 0.0008 | 0.1805 | 0   | 0   | 0   | 0   | 0   | 0       | 16      | 0       | 2       | 5       |
| Snora62                  | 4.918  | -0.5139 | 5.4763 | 0.0193 | 0.6697 | 0   | 0   | 0   | 0   | 0   | 0       | 23      | 3       | 0       | 0       |
| Myo15b                   | 4.7816 | -0.3822 | 9.1479 | 0.0025 | 0.3165 | 0   | 0   | 0   | 0   | 0   | 5       | 8       | 0       | 0       | 7       |
| Cox16                    | 4.7704 | 0.1935  | 13.81  | 0.0002 | 0.0895 | 0   | 0   | 0   | 0   | 0   | 0       | 2       | 0       | 6       | 7       |
| Mir7051                  | 4.7029 | -0.4897 | 6.9191 | 0.0085 | 0.5048 | 0   | 0   | 0   | 0   | 0   | 5       | 7       | 6       | 0       | 1       |
| Gm40941                  | 4.6819 | -0.4631 | 7.4628 | 0.0063 | 0.4478 | 0   | 0   | 0   | 0   | 0   | 0       | 16      | 5       | 0       | 0       |
| Gm30248                  | 4.4798 | -0.7259 | 4.8135 | 0.0282 | 0.7493 | 0   | 0   | 0   | 0   | 0   | 5       | 0       | 10      | 0       | 0       |
| Fscn2                    | 4.44   | -0.1479 | 12.048 | 0.0005 | 0.151  | 0   | 0   | 0   | 0   | 0   | 5       | 0       | 4       | 2       | 2       |
| Gm33655                  | 4.4213 | 0.0683  | 8.3873 | 0.0038 | 0.3726 | 0   | 0   | 0   | 0   | 0   | 0       | 13      | 0       | 0       | 4       |
| Fam83c                   | 4.3809 | -0.6616 | 6.4777 | 0.0109 | 0.5486 | 0   | 0   | 0   | 0   | 0   | 4       | 11      | 0       | 0       | 1       |
| Gstp2                    | 4.3755 | -0.4826 | 12.432 | 0.0004 | 0.1332 | 0   | 0   | 0   | 0   | 0   | 1       | 5       | 4       | 1       | 3       |
| Gm30938                  | 4.3646 | 0.1827  | 12.974 | 0.0003 | 0.1116 | 0   | 0   | 0   | 0   | 0   | 2       | 10      | 0       | 0       | 3       |
| Gm39957                  | 4.3608 | -0.6659 | 4.4132 | 0.0357 | 0.811  | 0   | 0   | 0   | 0   | 0   | 2       | 15      | 0       | 0       | 0       |
| Prss30                   | 4.318  | -0.4614 | 7.432  | 0.0064 | 0.4537 | 0   | 0   | 0   | 0   | 0   | 0       | 13      | 0       | 0       | 3       |
| Atoh7                    | 4.2839 | 0.0119  | 8.9265 | 0.0028 | 0.3251 | 0   | 0   | 0   | 0   | 0   | 0       | 16      | 0       | 0       | 0       |
| LOC108167                | 4.2812 | -0.3886 | 9.3292 | 0.0023 | 0.3028 | 0   | 0   | 0   | 0   | 0   | 1       | 0       | 1       | 6       | 1       |
| Pla2g4e                  | 4.2453 | 1.6599  | 14.402 | 0.0001 | 0.0808 | 0   | 0   | 0   | 0   | 0   | 7       | 0       | 0       | 0       | 5       |
| LOC108168                | 4.2411 | -0.791  | 5.2956 | 0.0214 | 0.6958 | 0   | 0   | 0   | 0   | 0   | 0       | 2       | 0       | 6       | 0       |
| Sec31b                   | 4.2221 | -0.6785 | 5.1708 | 0.023  | 0.7051 | 0   | 0   | 0   | 0   | 0   | 5       | 9       | 0       | 0       | 0       |
| Gm39662                  | 4.2188 | -0.8474 | 3.8548 | 0.0496 | 0.8726 | 0   | 0   | 0   | 0   | 0   | 0       | 0       | 0       | 5       | 3       |
| Atp2b3                   | 4.2171 | 5.2153  | 17.36  | 3E-05  | 0.0412 | 0   | 0   | 0   | 0   | 0   | 0       | 5       | 5       | 2       | 0       |
| LOC108167                | 4.2117 | -0.3946 | 4.5951 | 0.0321 | 0.7798 | 0   | 0   | 0   | 0   | 0   | 0       | 0       | 7       | 3       | 0       |
| Gbp6                     | 4.1736 | -0.2499 | 10.579 | 0.0011 | 0.2213 | 0   | 0   | 0   | 0   | 0   | 1       | 1       | 7       | 2       | 0       |
| Ptpn5                    | 4.1711 | 1.4578  | 14.238 | 0.0002 | 0.0813 | 0   | 0   | 0   | 0   | 0   | 0       | 13      | 0       | 0       | 0       |
| Myh2                     | 4.1289 | -0.1602 | 8.345  | 0.0039 | 0.3742 | 0   | 0   | 0   | 0   | 0   | 3       | 3       | 6       | 0       | 0       |
| H2-BI                    | 4.1254 | -0.6321 | 4.1755 | 0.041  | 0.8353 | 0   | 0   | 0   | 0   | 0   | 9       | 0       | 0       | 1       | 0       |
| Lep                      | 4.1253 | -0.6246 | 5.898  | 0.0152 | 0.6148 | 0   | 0   | 0   | 0   | 0   | 1       | 11      | 0       | 1       | 0       |
| F420015M                 | 4.1184 | 0.0769  | 12.983 | 0.0003 | 0.1116 | 0   | 0   | 0   | 0   | 0   | 0       | 6       | 6       | 0       | 0       |
| Lgr5                     | 4.1171 | 3.0689  | 15.26  | 9E-05  | 0.0631 | 0   | 0   | 0   | 0   | 0   | 5       | 1       | 0       | 1       | 4       |
| Gm41074                  | 4.11   | -0.8136 | 3.9761 | 0.0462 | 0.8611 | 0   | 0   | 0   | 0   | 0   | 0       | 0       | 8       | 2       | 0       |
| Gm10653                  | 4.1074 | -0.3827 | 12.023 | 0.0005 | 0.151  | 0   | 0   | 1   | 0   | 0   | 7       | 17      | 4       | 0       | 2       |
| Grid1                    | 4.1057 | 3.0743  | 15.677 | 8E-05  | 0.055  | 0   | 0   | 0   | 0   | 0   | 5       | 0       | 4       | 0       | 2       |
| Gm2164                   | 4.1045 | -0.5022 | 7.2884 | 0.0069 | 0.4711 | 0   | 0   | 0   | 0   | 0   | 0       | 12      | 0       | 1       | 0       |
| A3galt2                  | 4.1031 | 3.9938  | 15.752 | 7E-05  | 0.055  | 0   | 0   | 0   | 0   | 0   | 2       | 0       | 0       | 0       | 9       |
| LOC108167                | 4.0996 | -0.8468 | 3.8517 | 0.0497 | 0.8726 | 0   | 0   | 0   | 0   | 0   | 0       | 0       | 0       | 5       | 2       |
| Gm39786                  | 4.0922 | -0.8088 | 4.1545 | 0.0415 | 0.8377 | 0   | 0   | 0   | 0   | 0   | 0       | 0       | 0       | 5       | 2       |
| Gm12257                  | 4.0582 | -0.4003 | 3.9336 | 0.0473 | 0.8678 | 0   | 0   | 0   | 0   | 0   | 0       | 8       | 5       | 0       | 0       |
| Amhr2                    | 4.0474 | 0.6646  | 13.413 | 0.0002 | 0.1045 | 0   | 0   | 0   | 0   | 0   | 0       | 4       | 5       | 0       | 2       |
| Gm34921                  | 4.0348 | -0.5752 | 5.9623 | 0.0146 | 0.6057 | 0   | 0   | 0   | 0   | 0   | 1       | 0       | 9       | 0       | 1       |
| Gm39798                  | 4.0154 | -0.6941 | 6.1786 | 0.0129 | 0.5851 | 0   | 0   | 0   | 0   | 0   | 2       | 7       | 3       | 0       | 0       |
| Nlrp1c-ps                | 4.0068 | -0.4974 | 4.2488 | 0.0393 | 0.8224 | 0   | 0   | 0   | 0   | 0   | 0       | 0       | 11      | 0       | 0       |
| Gm16168                  | 3.9941 | 1.5047  | 13.291 | 0.0003 | 0.1078 | 0   | 0   | 0   | 0   | 0   | 0       | 10      | 1       | 0       | 0       |
| 4930547M                 | 3.9902 | -0.7761 | 5.5987 | 0.018  | 0.6481 | 0   | 0   | 0   | 0   | 0   | 1       | 0       | 6       | 2       | 0       |
| Tex36                    | 3.981  | -0.8304 | 3.8963 | 0.0484 | 0.8678 | 0   | 0   | 0   | 0   | 0   | 0       | 0       | 5       | 3       | 0       |
| Megf10                   | 3.9715 | 2.9754  | 14.447 | 0.0001 | 0.0808 | 0   | 0   | 0   | 0   | 0   | 0       | 0       | 3       | 0       | 7       |
| Gm39567                  | 3.9683 | -0.7674 | 4.0521 | 0.0441 | 0.8538 | 0   | 0   | 0   | 0   | 0   | 0       | 12      | 1       | 0       | 0       |
| C130083M                 | 3.9656 | -0.1511 | 12.134 | 0.0005 | 0.1486 | 0   | 0   | 0   | 0   | 0   | 3       | 1       | 2       | 0       | 4       |
| Gabrd                    | 3.9569 | 0.166   | 11.111 | 0.0009 | 0.1872 | 0   | 0   | 0   | 0   | 0   | 0       | 0       | 2       | 0       | 8       |
| Pcdhb13                  | 3.9453 | -0.2687 | 8.1263 | 0.0044 | 0.3914 | 0   | 0   | 0   | 0   | 0   | 0       | 11      | 0       | 0       | 1       |
| Gm32143                  | 3.9441 | -0.6936 | 4.8937 | 0.027  | 0.7403 | 0   | 0   | 0   | 0   | 0   | 5       | 6       | 0       | 0       | 0       |
| LOC102632                | 3.9435 | -0.5098 | 8.3866 | 0.0038 | 0.3726 | 0   | 0   | 0   | 0   | 0   | 0       | 4       | 0       | 3       | 2       |
| Atf7ip2                  | 3.9219 | -0.7568 | 5.1272 | 0.0236 | 0.7109 | 0   | 0   | 0   | 0   | 0   | 5       | 0       | 1       | 2       | 0       |
| Slc6a20b                 | 3.9213 | -0.5885 | 6.8586 | 0.0088 | 0.5121 | 0   | 0   | 0   | 0   | 0   | 1       | 0       | 7       | 0       | 2       |

|           |        |         |        |        |        |   |   |   |   |   |   |    |   |   |   |
|-----------|--------|---------|--------|--------|--------|---|---|---|---|---|---|----|---|---|---|
| Gm38506   | 3.91   | -0.2032 | 6.4962 | 0.0108 | 0.5486 | 0 | 0 | 0 | 0 | 0 | 0 | 0  | 6 | 0 | 4 |
| BC049715  | 3.9031 | 0.3025  | 10.348 | 0.0013 | 0.2316 | 0 | 0 | 0 | 0 | 0 | 0 | 10 | 1 | 0 | 0 |
| Gm36745   | 3.9007 | -0.6591 | 5.3504 | 0.0207 | 0.6895 | 0 | 0 | 0 | 0 | 0 | 0 | 5  | 6 | 0 | 0 |
| Gm41253   | 3.8732 | 0.4733  | 9.8235 | 0.0017 | 0.261  | 0 | 0 | 0 | 0 | 0 | 0 | 11 | 0 | 0 | 0 |
| Gm3740    | 3.8679 | -0.3044 | 7.6448 | 0.0057 | 0.434  | 0 | 0 | 0 | 0 | 0 | 0 | 6  | 3 | 1 | 0 |
| LOC108167 | 3.8641 | 0.0445  | 9.5436 | 0.002  | 0.2787 | 0 | 0 | 0 | 0 | 0 | 4 | 6  | 0 | 0 | 0 |
| Gm35437   | 3.8537 | -0.6719 | 5.3084 | 0.0212 | 0.6958 | 0 | 0 | 0 | 0 | 0 | 6 | 0  | 0 | 0 | 3 |
| Gareml    | 3.8523 | -0.2918 | 7.2484 | 0.0071 | 0.4745 | 0 | 0 | 0 | 0 | 0 | 6 | 0  | 3 | 0 | 0 |
| Gm33032   | 3.849  | -0.8326 | 3.9736 | 0.0462 | 0.8611 | 0 | 0 | 0 | 0 | 0 | 6 | 0  | 0 | 0 | 3 |
| Snora78   | 3.8395 | -0.7087 | 6.3823 | 0.0115 | 0.5577 | 0 | 0 | 0 | 0 | 0 | 4 | 5  | 1 | 0 | 0 |
| Gm39318   | 3.8361 | -0.4777 | 8.9439 | 0.0028 | 0.3247 | 0 | 0 | 0 | 0 | 0 | 3 | 0  | 0 | 0 | 6 |
| Gm10419   | 3.829  | 4.6141  | 13.027 | 0.0003 | 0.1116 | 0 | 0 | 0 | 0 | 0 | 0 | 0  | 7 | 0 | 2 |
| Wasf1     | 3.8287 | 3.9036  | 13.059 | 0.0003 | 0.1116 | 0 | 0 | 0 | 0 | 0 | 4 | 4  | 0 | 1 | 0 |
| Gm38907   | 3.8265 | -0.7775 | 5.6108 | 0.0179 | 0.6454 | 0 | 0 | 0 | 0 | 0 | 4 | 4  | 0 | 1 | 0 |
| Heyl      | 3.8119 | 2.5914  | 12.523 | 0.0004 | 0.1315 | 0 | 0 | 0 | 0 | 0 | 4 | 5  | 0 | 0 | 0 |
| Rab39     | 3.809  | 3.401   | 12.813 | 0.0003 | 0.1168 | 0 | 0 | 0 | 0 | 0 | 0 | 8  | 1 | 0 | 0 |
| Gm1043    | 3.8087 | 1.9661  | 11.89  | 0.0006 | 0.1538 | 0 | 0 | 0 | 0 | 0 | 0 | 4  | 4 | 1 | 0 |
| Lta       | 3.7952 | -0.4812 | 4.6579 | 0.0309 | 0.7726 | 0 | 0 | 0 | 0 | 0 | 3 | 0  | 6 | 0 | 0 |
| Gm36847   | 3.7939 | -0.6907 | 6.075  | 0.0137 | 0.6008 | 0 | 0 | 0 | 0 | 0 | 3 | 1  | 0 | 0 | 5 |
| 2610005L0 | 3.7927 | -0.3012 | 5.8805 | 0.0153 | 0.6176 | 0 | 0 | 0 | 0 | 0 | 0 | 0  | 4 | 3 | 0 |
| LOC105244 | 3.772  | -0.2775 | 6.008  | 0.0142 | 0.604  | 0 | 0 | 0 | 0 | 0 | 0 | 11 | 0 | 0 | 0 |
| Gm34802   | 3.7623 | -0.0137 | 7.9766 | 0.0047 | 0.4019 | 0 | 0 | 0 | 0 | 0 | 0 | 1  | 7 | 0 | 1 |
| Gm30316   | 3.7433 | -0.2657 | 7.2661 | 0.007  | 0.4716 | 0 | 0 | 2 | 0 | 0 | 9 | 20 | 0 | 1 | 5 |
| LOC108167 | 3.7223 | -0.4118 | 6.6677 | 0.0098 | 0.5335 | 0 | 0 | 0 | 0 | 0 | 0 | 0  | 5 | 1 | 2 |
| Gm33235   | 3.7179 | -0.6406 | 4.8441 | 0.0277 | 0.747  | 0 | 0 | 0 | 0 | 0 | 0 | 7  | 0 | 0 | 3 |
| Al662270  | 3.7062 | 1.4526  | 10.389 | 0.0013 | 0.2316 | 0 | 0 | 0 | 0 | 0 | 2 | 0  | 5 | 1 | 0 |
| Snord55   | 3.6857 | -0.3637 | 6.3442 | 0.0118 | 0.5589 | 0 | 0 | 0 | 0 | 0 | 4 | 0  | 0 | 0 | 4 |
| Gm11110   | 3.6804 | -0.4427 | 7.9631 | 0.0048 | 0.4019 | 0 | 0 | 0 | 0 | 0 | 0 | 5  | 3 | 0 | 1 |
| 4930483J1 | 3.6761 | -0.7289 | 5.0312 | 0.0249 | 0.7219 | 0 | 0 | 0 | 0 | 0 | 1 | 9  | 0 | 0 | 0 |
| Gm41349   | 3.6622 | 0.1149  | 8.9623 | 0.0028 | 0.324  | 0 | 0 | 0 | 0 | 0 | 1 | 8  | 0 | 0 | 0 |
| Gm34825   | 3.662  | -0.8678 | 5.3512 | 0.0207 | 0.6895 | 0 | 0 | 0 | 0 | 0 | 1 | 0  | 0 | 3 | 2 |
| Gm26691   | 3.6406 | 0.0909  | 7.4689 | 0.0063 | 0.4472 | 0 | 0 | 0 | 0 | 0 | 0 | 0  | 3 | 0 | 5 |
| Gm41061   | 3.6244 | -0.7448 | 3.9871 | 0.0459 | 0.8611 | 0 | 0 | 0 | 0 | 0 | 3 | 6  | 0 | 0 | 0 |
| 5830444B0 | 3.6165 | -0.1605 | 5.7317 | 0.0167 | 0.6337 | 0 | 0 | 0 | 0 | 0 | 0 | 0  | 5 | 0 | 3 |
| Fv1       | 3.6147 | -0.7462 | 4.8721 | 0.0273 | 0.7445 | 0 | 0 | 0 | 0 | 0 | 0 | 5  | 4 | 0 | 0 |
| Gm35125   | 3.6084 | -0.1226 | 7.501  | 0.0062 | 0.4459 | 0 | 0 | 0 | 0 | 0 | 0 | 0  | 0 | 4 | 2 |
| Gm29826   | 3.6077 | -0.7041 | 4.2088 | 0.0402 | 0.8291 | 0 | 0 | 0 | 0 | 0 | 0 | 0  | 3 | 0 | 5 |
| 4921511C1 | 3.6061 | -0.8332 | 4.0247 | 0.0448 | 0.8574 | 0 | 0 | 0 | 0 | 0 | 0 | 0  | 3 | 0 | 5 |
| Gm32835   | 3.6011 | -0.7218 | 4.5773 | 0.0324 | 0.7817 | 0 | 0 | 0 | 0 | 0 | 4 | 0  | 0 | 2 | 0 |
| F630042J0 | 3.5949 | -0.6375 | 6.8911 | 0.0087 | 0.5068 | 0 | 0 | 0 | 0 | 0 | 3 | 0  | 2 | 1 | 1 |
| Fndc7     | 3.5837 | -0.7215 | 7.206  | 0.0073 | 0.4784 | 0 | 0 | 0 | 0 | 0 | 2 | 0  | 0 | 1 | 4 |
| 2810039B1 | 3.5808 | -0.4374 | 6.536  | 0.0106 | 0.5456 | 0 | 0 | 0 | 0 | 0 | 2 | 0  | 4 | 1 | 0 |
| Galnt6    | 3.5777 | 1.7007  | 10.035 | 0.0015 | 0.2523 | 0 | 0 | 0 | 0 | 0 | 0 | 8  | 0 | 0 | 0 |
| Zmynd12   | 3.5754 | -0.4704 | 5.3108 | 0.0212 | 0.6958 | 0 | 0 | 0 | 0 | 0 | 0 | 7  | 0 | 0 | 2 |
| Olfml2a   | 3.5738 | -0.3507 | 6.5382 | 0.0106 | 0.5456 | 0 | 0 | 0 | 0 | 0 | 0 | 0  | 0 | 5 | 0 |
| Rhoh      | 3.561  | -0.4681 | 6.9239 | 0.0085 | 0.5048 | 0 | 0 | 0 | 0 | 0 | 1 | 0  | 5 | 1 | 0 |
| Gm34360   | 3.5584 | -0.3611 | 6.7047 | 0.0096 | 0.525  | 0 | 0 | 0 | 0 | 0 | 0 | 9  | 0 | 0 | 0 |
| Platr10   | 3.5462 | -0.8373 | 3.8996 | 0.0483 | 0.8678 | 0 | 0 | 0 | 0 | 0 | 0 | 7  | 0 | 0 | 2 |
| Hormad2   | 3.5441 | -0.2612 | 6.1026 | 0.0135 | 0.5973 | 0 | 0 | 0 | 0 | 0 | 6 | 0  | 0 | 0 | 1 |
| Cort      | 3.5394 | -0.7396 | 4.001  | 0.0455 | 0.8587 | 0 | 0 | 0 | 0 | 0 | 6 | 0  | 0 | 0 | 1 |
| AV039307  | 3.5386 | 0.0422  | 7.9397 | 0.0048 | 0.4028 | 0 | 0 | 0 | 0 | 0 | 0 | 0  | 5 | 1 | 1 |
| Pcdh20    | 3.5303 | -0.1713 | 5.8058 | 0.016  | 0.628  | 0 | 0 | 0 | 0 | 0 | 0 | 9  | 0 | 0 | 0 |
| 4931403E2 | 3.5199 | -0.3285 | 6.0901 | 0.0136 | 0.6001 | 0 | 0 | 0 | 0 | 0 | 0 | 4  | 0 | 0 | 4 |
| Gm36440   | 3.5184 | -0.4204 | 6.195  | 0.0128 | 0.5841 | 0 | 0 | 0 | 0 | 0 | 4 | 0  | 0 | 0 | 3 |
| Gm31348   | 3.5182 | -0.5556 | 4.375  | 0.0365 | 0.8112 | 0 | 0 | 0 | 0 | 0 | 5 | 0  | 2 | 0 | 0 |
| 1700080G1 | 3.5139 | -0.8168 | 3.8452 | 0.0499 | 0.8743 | 0 | 0 | 0 | 0 | 0 | 0 | 7  | 0 | 1 | 0 |
| Gm39663   | 3.5081 | -0.6576 | 5.6611 | 0.0173 | 0.6381 | 0 | 0 | 0 | 0 | 0 | 0 | 4  | 1 | 0 | 3 |
| Gm11747   | 3.5024 | -0.7021 | 3.982  | 0.046  | 0.8611 | 0 | 0 | 0 | 0 | 0 | 0 | 0  | 2 | 3 | 0 |
| Slc2a13   | 3.4947 | 1.6849  | 9.1534 | 0.0025 | 0.3165 | 0 | 0 | 0 | 0 | 0 | 0 | 0  | 0 | 0 | 7 |
| Mpp3      | 3.4932 | 1.2782  | 8.8956 | 0.0029 | 0.3276 | 0 | 0 | 0 | 0 | 0 | 0 | 0  | 0 | 0 | 7 |
| Fam71f2   | 3.4851 | -0.6069 | 6.1758 | 0.013  | 0.5852 | 0 | 0 | 0 | 0 | 0 | 0 | 5  | 3 | 0 | 0 |
| Wdr95     | 3.4817 | -0.5455 | 4.026  | 0.0448 | 0.8574 | 0 | 0 | 0 | 0 | 0 | 0 | 9  | 0 | 0 | 0 |

|           |        |         |        |        |        |   |   |   |   |   |   |    |    |   |   |
|-----------|--------|---------|--------|--------|--------|---|---|---|---|---|---|----|----|---|---|
| Gm34296   | 3.4785 | -0.7225 | 5.8995 | 0.0151 | 0.6148 | 0 | 0 | 0 | 0 | 0 | 2 | 0  | 4  | 0 | 1 |
| Tram1l1   | 3.4769 | 3.4826  | 9.9687 | 0.0016 | 0.2567 | 0 | 0 | 0 | 0 | 0 | 1 | 6  | 0  | 0 | 0 |
| Dmbx1     | 3.4766 | -0.5742 | 6.032  | 0.014  | 0.604  | 0 | 0 | 0 | 0 | 0 | 2 | 0  | 5  | 0 | 0 |
| Fcgr2b    | 3.476  | 0.2356  | 7.9862 | 0.0047 | 0.4019 | 0 | 0 | 0 | 0 | 0 | 0 | 0  | 5  | 0 | 2 |
| Gm28802   | 3.4666 | -0.7177 | 3.9083 | 0.048  | 0.8678 | 0 | 0 | 0 | 0 | 0 | 0 | 0  | 0  | 4 | 0 |
| Gm33723   | 3.4518 | -0.3019 | 6.5217 | 0.0107 | 0.546  | 0 | 0 | 0 | 0 | 0 | 0 | 0  | 7  | 0 | 0 |
| Fsd2      | 3.4472 | -0.259  | 7.1288 | 0.0076 | 0.4871 | 0 | 0 | 0 | 0 | 0 | 0 | 8  | 0  | 0 | 0 |
| Gm34050   | 3.4439 | -0.6899 | 5.5571 | 0.0184 | 0.6548 | 0 | 0 | 0 | 0 | 0 | 0 | 4  | 0  | 1 | 2 |
| Gm31042   | 3.4427 | -0.6628 | 4.181  | 0.0409 | 0.8344 | 0 | 0 | 0 | 0 | 0 | 0 | 0  | 0  | 4 | 0 |
| Scgb1c1   | 3.4373 | -0.7591 | 4.0014 | 0.0455 | 0.8587 | 0 | 0 | 0 | 0 | 0 | 0 | 0  | 2  | 0 | 5 |
| Lrp2bp    | 3.4294 | -0.2798 | 5.764  | 0.0164 | 0.6285 | 1 | 0 | 0 | 0 | 0 | 4 | 12 | 0  | 1 | 2 |
| Npas1     | 3.427  | -0.7078 | 4.3927 | 0.0361 | 0.811  | 0 | 0 | 0 | 0 | 0 | 0 | 0  | 6  | 0 | 1 |
| Tfap2d    | 3.4237 | -0.8696 | 5.4095 | 0.02   | 0.6772 | 0 | 0 | 0 | 0 | 0 | 3 | 0  | 2  | 1 | 0 |
| 1700088E0 | 3.4227 | -0.7972 | 4.8548 | 0.0276 | 0.7469 | 0 | 0 | 0 | 0 | 0 | 1 | 5  | 0  | 1 | 0 |
| Fam98c    | 3.4027 | -0.1867 | 7.8597 | 0.0051 | 0.4133 | 0 | 0 | 1 | 0 | 0 | 2 | 10 | 3  | 0 | 3 |
| Gpr1      | 3.3759 | -0.1097 | 5.1847 | 0.0228 | 0.7051 | 0 | 0 | 0 | 0 | 0 | 0 | 8  | 0  | 0 | 0 |
| Pdia2     | 3.3566 | -0.594  | 4.588  | 0.0322 | 0.7798 | 0 | 0 | 0 | 0 | 0 | 0 | 8  | 0  | 0 | 0 |
| 1700011L2 | 3.355  | -0.2912 | 4.6972 | 0.0302 | 0.7699 | 0 | 0 | 0 | 0 | 0 | 6 | 0  | 0  | 0 | 0 |
| Slc19a3   | 3.3495 | -0.4569 | 4.3567 | 0.0369 | 0.8131 | 0 | 0 | 0 | 0 | 0 | 0 | 8  | 0  | 0 | 0 |
| A430010J1 | 3.3459 | -0.4626 | 7.5252 | 0.0061 | 0.4459 | 0 | 0 | 0 | 0 | 0 | 1 | 0  | 3  | 1 | 1 |
| Gm4737    | 3.3403 | -0.4991 | 5.7683 | 0.0163 | 0.6285 | 0 | 0 | 0 | 0 | 0 | 5 | 0  | 0  | 0 | 1 |
| Siglece   | 3.34   | -0.5232 | 5.2746 | 0.0216 | 0.6958 | 0 | 0 | 0 | 0 | 0 | 5 | 0  | 0  | 0 | 1 |
| Gm35186   | 3.3353 | -0.6412 | 3.8695 | 0.0492 | 0.8715 | 0 | 0 | 0 | 0 | 0 | 0 | 8  | 0  | 0 | 0 |
| Ulbp1     | 3.3269 | -0.6185 | 6.2357 | 0.0125 | 0.5758 | 0 | 0 | 0 | 0 | 0 | 4 | 0  | 0  | 0 | 2 |
| Ms4a4c    | 3.3232 | -0.5903 | 5.7839 | 0.0162 | 0.6285 | 0 | 0 | 0 | 0 | 0 | 4 | 0  | 1  | 0 | 1 |
| Gm32002   | 3.3204 | -0.7559 | 4.6395 | 0.0312 | 0.7726 | 0 | 0 | 0 | 0 | 0 | 0 | 0  | 0  | 2 | 3 |
| Gm36198   | 3.3182 | -0.4962 | 4.4032 | 0.0359 | 0.811  | 0 | 0 | 0 | 0 | 0 | 0 | 0  | 3  | 2 | 0 |
| Gm40139   | 3.3139 | -0.7075 | 4.4634 | 0.0346 | 0.8027 | 0 | 0 | 0 | 0 | 0 | 2 | 3  | 0  | 1 | 0 |
| Ncam2     | 3.3118 | 5.0203  | 8.7879 | 0.003  | 0.3378 | 0 | 0 | 0 | 0 | 0 | 0 | 0  | 0  | 4 | 2 |
| Gm27042   | 3.3051 | -0.588  | 4.4131 | 0.0357 | 0.811  | 0 | 0 | 0 | 0 | 0 | 3 | 0  | 0  | 0 | 3 |
| Fsd1      | 3.2994 | 4.6003  | 8.7176 | 0.0032 | 0.3385 | 0 | 0 | 0 | 0 | 0 | 5 | 0  | 0  | 0 | 1 |
| Dlgap3    | 3.2968 | 4.2569  | 8.7715 | 0.0031 | 0.3382 | 0 | 0 | 0 | 0 | 0 | 0 | 0  | 3  | 1 | 2 |
| Il12rb1   | 3.296  | -0.671  | 4.747  | 0.0293 | 0.7602 | 0 | 0 | 0 | 0 | 0 | 3 | 0  | 3  | 0 | 0 |
| Kcnj3     | 3.2952 | 4.4333  | 8.762  | 0.0031 | 0.3382 | 0 | 0 | 0 | 0 | 0 | 1 | 0  | 0  | 0 | 5 |
| Gm19345   | 3.2908 | 0.9875  | 7.4775 | 0.0062 | 0.4459 | 0 | 0 | 0 | 0 | 0 | 0 | 0  | 0  | 0 | 6 |
| Jakmip3   | 3.2892 | 3.5407  | 8.6853 | 0.0032 | 0.3414 | 0 | 0 | 0 | 0 | 0 | 0 | 2  | 4  | 0 | 0 |
| Rnd1      | 3.2856 | 0.8026  | 7.1096 | 0.0077 | 0.4899 | 0 | 0 | 0 | 0 | 0 | 1 | 0  | 5  | 0 | 0 |
| Slc2a6    | 3.2829 | 3.1957  | 8.634  | 0.0033 | 0.3481 | 0 | 0 | 0 | 0 | 0 | 0 | 4  | 2  | 0 | 0 |
| Vstm2b    | 3.28   | 1.438   | 8.3666 | 0.0038 | 0.3742 | 0 | 0 | 0 | 0 | 0 | 0 | 4  | 0  | 1 | 1 |
| Msr1      | 3.2788 | 0.4799  | 7.3864 | 0.0066 | 0.4591 | 0 | 0 | 0 | 0 | 0 | 0 | 0  | 6  | 0 | 0 |
| Astn1     | 3.2754 | 3.3011  | 8.5822 | 0.0034 | 0.3532 | 0 | 0 | 0 | 0 | 0 | 0 | 6  | 0  | 0 | 0 |
| LOC10816E | 3.266  | -0.1012 | 5.986  | 0.0144 | 0.6046 | 0 | 0 | 0 | 0 | 0 | 0 | 0  | 3  | 0 | 3 |
| Gm34505   | 3.2636 | 0.0253  | 6.392  | 0.0115 | 0.5577 | 0 | 0 | 0 | 0 | 0 | 0 | 0  | 6  | 0 | 0 |
| Gm2427    | 3.2593 | -0.5864 | 4.1912 | 0.0406 | 0.8329 | 0 | 0 | 0 | 0 | 0 | 0 | 0  | 0  | 3 | 1 |
| Gm38800   | 3.2499 | 0.0774  | 5.7301 | 0.0167 | 0.6337 | 0 | 0 | 0 | 0 | 0 | 0 | 7  | 0  | 0 | 0 |
| Lrrc3b    | 3.2495 | 2.3618  | 8.1444 | 0.0043 | 0.3895 | 0 | 0 | 0 | 0 | 0 | 0 | 5  | 0  | 0 | 1 |
| Gm32316   | 3.2463 | -0.413  | 5.3107 | 0.0212 | 0.6958 | 0 | 0 | 0 | 0 | 0 | 0 | 0  | 6  | 0 | 0 |
| LOC10816G | 3.2416 | -0.3743 | 4.9546 | 0.026  | 0.7335 | 0 | 0 | 1 | 0 | 0 | 0 | 12 | 0  | 1 | 3 |
| Aim2      | 3.2332 | 0.5513  | 6.9125 | 0.0086 | 0.5048 | 0 | 0 | 0 | 0 | 0 | 2 | 0  | 0  | 3 | 0 |
| Asb5      | 3.2286 | -0.3253 | 4.1615 | 0.0414 | 0.8377 | 0 | 0 | 0 | 0 | 0 | 0 | 0  | 6  | 0 | 0 |
| Gm35623   | 3.2167 | 1.1176  | 11.531 | 0.0007 | 0.171  | 0 | 0 | 0 | 1 | 0 | 0 | 8  | 6  | 1 | 0 |
| 4930528A1 | 3.2084 | -0.2533 | 4.7076 | 0.03   | 0.7694 | 0 | 0 | 0 | 0 | 0 | 0 | 7  | 0  | 0 | 0 |
| Dnali1    | 3.1968 | -0.6013 | 5.9006 | 0.0151 | 0.6148 | 0 | 0 | 0 | 0 | 0 | 0 | 1  | 1  | 2 | 1 |
| Gm32724   | 3.1938 | -0.4279 | 4.3169 | 0.0377 | 0.8131 | 0 | 0 | 0 | 0 | 0 | 0 | 7  | 0  | 0 | 0 |
| Ttbk1     | 3.1844 | 4.9043  | 14.193 | 0.0002 | 0.0813 | 0 | 1 | 0 | 0 | 0 | 0 | 13 | 1  | 0 | 0 |
| Pcdhgb7   | 3.1724 | -0.326  | 5.1103 | 0.0238 | 0.7149 | 0 | 1 | 0 | 0 | 0 | 0 | 0  | 1  | 5 | 4 |
| LOC10264C | 3.1659 | -0.7033 | 4.0128 | 0.0452 | 0.8577 | 0 | 0 | 0 | 0 | 0 | 0 | 0  | 4  | 1 | 0 |
| Gm33025   | 3.1568 | -0.5876 | 5.0642 | 0.0244 | 0.7207 | 0 | 0 | 0 | 0 | 0 | 0 | 0  | 1  | 1 | 3 |
| Mrgprf    | 3.146  | 0.8806  | 8.0911 | 0.0044 | 0.3937 | 0 | 0 | 0 | 1 | 0 | 1 | 0  | 11 | 0 | 2 |
| Kdm4d     | 3.1394 | 0.0963  | 6.1314 | 0.0133 | 0.5913 | 0 | 0 | 0 | 0 | 0 | 0 | 5  | 0  | 0 | 1 |
| Gm3739    | 3.1352 | -0.7422 | 4.9566 | 0.026  | 0.7335 | 0 | 0 | 0 | 0 | 0 | 1 | 4  | 0  | 0 | 1 |
| Nron      | 3.1293 | -0.2964 | 4.1663 | 0.0412 | 0.8377 | 0 | 0 | 0 | 0 | 1 | 0 | 19 | 0  | 0 | 1 |

|           |        |         |        |        |        |   |   |   |   |   |    |    |    |   |   |
|-----------|--------|---------|--------|--------|--------|---|---|---|---|---|----|----|----|---|---|
| Gabrg3    | 3.1222 | -0.2249 | 6.2521 | 0.0124 | 0.5751 | 0 | 0 | 0 | 0 | 0 | 0  | 6  | 0  | 0 | 0 |
| Gm34205   | 3.1198 | -0.6701 | 4.5446 | 0.033  | 0.7852 | 0 | 0 | 0 | 0 | 0 | 5  | 0  | 0  | 0 | 0 |
| Cfap54    | 3.1183 | 0.0408  | 5.0512 | 0.0246 | 0.7214 | 0 | 0 | 0 | 0 | 0 | 5  | 0  | 0  | 0 | 0 |
| Lbx2      | 3.1173 | -0.3939 | 5.14   | 0.0234 | 0.7084 | 0 | 0 | 0 | 0 | 0 | 0  | 0  | 0  | 3 | 1 |
| Efcab9    | 3.1171 | -0.2756 | 5.2685 | 0.0217 | 0.6963 | 0 | 0 | 0 | 0 | 0 | 5  | 0  | 0  | 0 | 0 |
| Gm42232   | 3.1161 | -0.7733 | 3.899  | 0.0483 | 0.8678 | 0 | 0 | 0 | 0 | 0 | 1  | 0  | 1  | 2 | 0 |
| Dcdc2a    | 3.1139 | 0.9179  | 6.7618 | 0.0093 | 0.5214 | 0 | 0 | 0 | 0 | 0 | 2  | 0  | 0  | 1 | 2 |
| Mdh1b     | 3.1026 | -0.0621 | 5.9026 | 0.0151 | 0.6148 | 0 | 0 | 0 | 0 | 0 | 0  | 6  | 0  | 0 | 0 |
| Sycp1-ps1 | 3.1018 | -0.5768 | 10.005 | 0.0016 | 0.2542 | 0 | 1 | 0 | 0 | 0 | 2  | 6  | 2  | 2 | 1 |
| 2610305D1 | 3.0967 | 0.9985  | 5.7656 | 0.0163 | 0.6285 | 0 | 0 | 0 | 0 | 0 | 4  | 0  | 1  | 0 | 0 |
| Ano2      | 3.0818 | -0.4237 | 5.6547 | 0.0174 | 0.6381 | 0 | 0 | 2 | 0 | 0 | 3  | 8  | 0  | 6 | 0 |
| Hpca      | 3.0775 | 4.9361  | 7.0708 | 0.0078 | 0.4937 | 0 | 0 | 0 | 0 | 0 | 5  | 0  | 0  | 0 | 0 |
| Adamts16  | 3.0692 | 0.1145  | 6.8731 | 0.0088 | 0.5102 | 0 | 0 | 0 | 0 | 0 | 2  | 0  | 1  | 0 | 2 |
| Morn5     | 3.0658 | 0.1242  | 6.2371 | 0.0125 | 0.5758 | 0 | 0 | 0 | 0 | 0 | 1  | 0  | 0  | 0 | 4 |
| Pirt      | 3.0632 | 8.0307  | 7.341  | 0.0067 | 0.4636 | 0 | 0 | 0 | 0 | 0 | 0  | 0  | 0  | 2 | 3 |
| Carm1     | 3.0623 | -0.5752 | 4.3484 | 0.037  | 0.8131 | 0 | 0 | 0 | 0 | 0 | 0  | 5  | 0  | 0 | 1 |
| Aard      | 3.0608 | 2.3507  | 7.1818 | 0.0074 | 0.4817 | 0 | 0 | 0 | 0 | 0 | 0  | 0  | 1  | 0 | 4 |
| Plekhd1   | 3.0599 | 5.4074  | 7.2703 | 0.007  | 0.4716 | 0 | 0 | 0 | 0 | 0 | 0  | 0  | 5  | 0 | 0 |
| Grik3     | 3.059  | 1.9567  | 7.1626 | 0.0074 | 0.4834 | 0 | 0 | 0 | 0 | 0 | 0  | 0  | 5  | 0 | 0 |
| Chrna2    | 3.059  | -0.7035 | 4.9512 | 0.0261 | 0.7335 | 0 | 0 | 0 | 0 | 0 | 1  | 3  | 0  | 1 | 0 |
| Snord123  | 3.0589 | -0.4403 | 5.0698 | 0.0243 | 0.7207 | 0 | 0 | 0 | 0 | 0 | 0  | 6  | 0  | 0 | 0 |
| Gm41858   | 3.0578 | -0.4462 | 4.387  | 0.0362 | 0.811  | 0 | 0 | 2 | 0 | 0 | 0  | 8  | 4  | 3 | 4 |
| Gm37915   | 3.0535 | -0.4715 | 4.2219 | 0.0399 | 0.8261 | 0 | 0 | 0 | 0 | 0 | 0  | 5  | 1  | 0 | 0 |
| Tpsb2     | 3.0533 | 1.0631  | 5.7592 | 0.0164 | 0.6285 | 0 | 0 | 0 | 0 | 0 | 0  | 0  | 0  | 4 | 0 |
| Tdrd6     | 3.0523 | 0.2411  | 6.6297 | 0.01   | 0.5402 | 0 | 0 | 0 | 0 | 0 | 2  | 1  | 2  | 0 | 0 |
| Gm35850   | 3.0493 | 0.0592  | 5.9886 | 0.0144 | 0.6045 | 0 | 0 | 0 | 0 | 0 | 0  | 0  | 2  | 0 | 3 |
| Tldc2     | 3.0481 | 0.9672  | 6.3463 | 0.0118 | 0.5589 | 0 | 0 | 0 | 0 | 0 | 0  | 0  | 5  | 0 | 0 |
| LOC108168 | 3.0456 | -0.3273 | 5.7988 | 0.016  | 0.6285 | 0 | 0 | 0 | 0 | 0 | 2  | 1  | 0  | 0 | 2 |
| AA465934  | 3.0396 | -0.6088 | 4.6753 | 0.0306 | 0.7712 | 0 | 0 | 0 | 0 | 0 | 0  | 6  | 0  | 0 | 0 |
| Cfap74    | 3.0385 | 0.4924  | 5.6433 | 0.0175 | 0.6392 | 0 | 0 | 0 | 0 | 0 | 0  | 0  | 4  | 0 | 1 |
| Spag8     | 3.0382 | -0.7578 | 4.4534 | 0.0348 | 0.8037 | 0 | 0 | 0 | 0 | 0 | 1  | 0  | 3  | 0 | 1 |
| Dazl      | 3.0339 | -0.6548 | 4.5012 | 0.0339 | 0.7959 | 0 | 0 | 0 | 0 | 0 | 0  | 0  | 0  | 0 | 5 |
| Abca13    | 3.0321 | -0.3328 | 4.3806 | 0.0364 | 0.811  | 0 | 0 | 0 | 0 | 0 | 0  | 0  | 0  | 0 | 5 |
| Hes7      | 3.0318 | -0.5741 | 4.8575 | 0.0275 | 0.7469 | 0 | 0 | 0 | 0 | 0 | 0  | 0  | 2  | 0 | 3 |
| Casr      | 3.0293 | 1.0036  | 6.8453 | 0.0089 | 0.5138 | 0 | 0 | 0 | 0 | 0 | 0  | 3  | 0  | 0 | 2 |
| Gm39861   | 3.0291 | 0.0154  | 4.6905 | 0.0303 | 0.7699 | 0 | 0 | 0 | 0 | 0 | 0  | 0  | 2  | 0 | 3 |
| Nr5a2     | 3.0256 | 0.822   | 5.8622 | 0.0155 | 0.6198 | 0 | 0 | 0 | 0 | 0 | 0  | 1  | 0  | 0 | 4 |
| Gpr135    | 3.0221 | -0.0139 | 4.922  | 0.0265 | 0.7377 | 0 | 0 | 0 | 0 | 0 | 0  | 0  | 5  | 0 | 0 |
| Aldoat2   | 3.0211 | -0.4401 | 5.4175 | 0.0199 | 0.6772 | 0 | 0 | 0 | 0 | 0 | 3  | 2  | 0  | 0 | 0 |
| Amn       | 3.0134 | -0.6606 | 4.1035 | 0.0428 | 0.845  | 0 | 0 | 0 | 0 | 0 | 0  | 6  | 0  | 0 | 0 |
| Nphs2     | 3.0122 | -0.455  | 4.0756 | 0.0435 | 0.85   | 0 | 0 | 0 | 0 | 0 | 0  | 6  | 0  | 0 | 0 |
| 1700003M  | 3.0111 | -0.5447 | 4.3364 | 0.0373 | 0.8131 | 0 | 0 | 0 | 0 | 0 | 0  | 0  | 5  | 0 | 0 |
| Gps1      | 3.0021 | -0.5466 | 3.842  | 0.05   | 0.8743 | 0 | 0 | 0 | 0 | 0 | 0  | 6  | 0  | 0 | 0 |
| LOC108167 | 2.995  | -0.438  | 4.4024 | 0.0359 | 0.811  | 1 | 0 | 0 | 0 | 0 | 3  | 0  | 4  | 1 | 4 |
| Smpd5     | 2.9846 | 0.9348  | 10.117 | 0.0015 | 0.2469 | 0 | 2 | 0 | 0 | 0 | 2  | 14 | 3  | 0 | 2 |
| Gm32720   | 2.9702 | 0.7594  | 13.795 | 0.0002 | 0.0895 | 0 | 0 | 3 | 0 | 0 | 4  | 13 | 3  | 4 | 2 |
| Gm29948   | 2.9591 | 0.3145  | 8.2752 | 0.004  | 0.3802 | 2 | 0 | 1 | 0 | 0 | 0  | 3  | 17 | 3 | 3 |
| Gm41640   | 2.9477 | 0.1749  | 9.7432 | 0.0018 | 0.2632 | 0 | 2 | 1 | 1 | 1 | 11 | 13 | 4  | 7 | 3 |
| Gh        | 2.9458 | 6.9024  | 5.2285 | 0.0222 | 0.6995 | 0 | 0 | 0 | 0 | 0 | 0  | 0  | 0  | 2 | 2 |
| Gm40710   | 2.9457 | -0.4417 | 4.5614 | 0.0327 | 0.7852 | 0 | 0 | 0 | 0 | 0 | 3  | 0  | 0  | 1 | 0 |
| Col2a1    | 2.9424 | 0.5753  | 5.9494 | 0.0147 | 0.6067 | 0 | 0 | 0 | 0 | 0 | 0  | 5  | 0  | 0 | 0 |
| Gm29901   | 2.9422 | -0.4659 | 4.0633 | 0.0438 | 0.8522 | 0 | 0 | 0 | 0 | 0 | 0  | 2  | 0  | 0 | 3 |
| LOC105246 | 2.9377 | -0.6581 | 4.1333 | 0.042  | 0.8426 | 0 | 0 | 0 | 0 | 0 | 2  | 3  | 0  | 0 | 0 |
| Gpx2      | 2.9341 | 1.1724  | 8.2718 | 0.004  | 0.3802 | 1 | 0 | 0 | 1 | 0 | 1  | 0  | 3  | 8 | 3 |
| Gm35531   | 2.9264 | -0.5079 | 4.4789 | 0.0343 | 0.7996 | 0 | 0 | 0 | 0 | 0 | 2  | 0  | 1  | 1 | 0 |
| Gm35380   | 2.9165 | -0.6242 | 3.9407 | 0.0471 | 0.8678 | 0 | 0 | 0 | 0 | 0 | 0  | 0  | 0  | 1 | 3 |
| Camkv     | 2.9006 | 0.2243  | 5.4196 | 0.0199 | 0.6771 | 0 | 0 | 0 | 0 | 0 | 0  | 0  | 0  | 2 | 0 |
| Gm30149   | 2.8911 | -0.2371 | 6.0563 | 0.0139 | 0.6019 | 1 | 0 | 0 | 0 | 0 | 2  | 6  | 3  | 1 | 0 |
| Gm33533   | 2.878  | -0.4479 | 7.9615 | 0.0048 | 0.4019 | 1 | 1 | 0 | 0 | 0 | 2  | 12 | 3  | 0 | 3 |
| C5ar1     | 2.8538 | -0.4837 | 4.6518 | 0.031  | 0.7726 | 0 | 0 | 0 | 0 | 0 | 0  | 5  | 0  | 0 | 0 |
| Saxo1     | 2.8424 | -0.6724 | 5.9627 | 0.0146 | 0.6057 | 1 | 0 | 0 | 0 | 0 | 1  | 2  | 3  | 1 | 4 |
| Ankub1    | 2.8326 | -0.2939 | 4.5851 | 0.0323 | 0.7798 | 0 | 0 | 0 | 0 | 0 | 4  | 0  | 0  | 0 | 0 |





|                  |        |         |        |        |        |   |    |   |   |   |    |    |    |   |    |
|------------------|--------|---------|--------|--------|--------|---|----|---|---|---|----|----|----|---|----|
| <b>Agt</b>       | 2.4427 | 2.7511  | 4.3368 | 0.0373 | 0.8131 | 0 | 0  | 0 | 0 | 0 | 3  | 0  | 0  | 0 | 0  |
| <b>Hlx</b>       | 2.4426 | 0.5983  | 4.1157 | 0.0425 | 0.844  | 0 | 0  | 0 | 0 | 0 | 1  | 0  | 0  | 0 | 2  |
| <b>Gm29543</b>   | 2.4425 | 1.5817  | 4.3389 | 0.0373 | 0.8131 | 0 | 0  | 0 | 0 | 0 | 3  | 0  | 0  | 0 | 0  |
| <b>Lrrtm3</b>    | 2.4423 | 3.0744  | 4.3801 | 0.0364 | 0.811  | 0 | 0  | 0 | 0 | 0 | 0  | 0  | 0  | 1 | 2  |
| <b>9530052E0</b> | 2.4407 | -0.744  | 4.6386 | 0.0313 | 0.7726 | 0 | 0  | 0 | 0 | 1 | 1  | 3  | 3  | 0 | 2  |
| <b>Icam2</b>     | 2.4389 | 0.6624  | 4.0282 | 0.0447 | 0.8574 | 0 | 0  | 0 | 0 | 0 | 1  | 0  | 2  | 0 | 0  |
| <b>C13005001</b> | 2.4383 | -0.2014 | 4.1625 | 0.0413 | 0.8377 | 0 | 0  | 0 | 0 | 0 | 1  | 0  | 2  | 0 | 0  |
| <b>Elmo1</b>     | 2.4368 | 3.9687  | 4.3923 | 0.0361 | 0.811  | 0 | 0  | 0 | 0 | 0 | 3  | 0  | 0  | 0 | 0  |
| <b>LOC105244</b> | 2.4353 | 1.3961  | 4.2844 | 0.0385 | 0.8177 | 0 | 0  | 0 | 0 | 0 | 0  | 0  | 0  | 0 | 3  |
| <b>5330417C2</b> | 2.4351 | 1.4995  | 4.1588 | 0.0414 | 0.8377 | 0 | 0  | 0 | 0 | 0 | 0  | 0  | 0  | 0 | 3  |
| <b>Slain1</b>    | 2.4346 | 1.314   | 4.0742 | 0.0435 | 0.85   | 0 | 0  | 0 | 0 | 0 | 0  | 0  | 0  | 0 | 3  |
| <b>6720432DC</b> | 2.4342 | 0.323   | 4.0336 | 0.0446 | 0.8574 | 0 | 0  | 0 | 0 | 0 | 0  | 0  | 0  | 0 | 3  |
| <b>P2rx2</b>     | 2.434  | 0.7088  | 4.3607 | 0.0368 | 0.8127 | 0 | 0  | 1 | 0 | 0 | 0  | 0  | 8  | 0 | 0  |
| <b>Panx2</b>     | 2.4339 | 4.869   | 4.3651 | 0.0367 | 0.8126 | 0 | 0  | 0 | 0 | 0 | 0  | 0  | 3  | 0 | 0  |
| <b>Extl1</b>     | 2.4332 | 1.6444  | 4.3184 | 0.0377 | 0.8131 | 0 | 0  | 0 | 0 | 0 | 0  | 0  | 3  | 0 | 0  |
| <b>Tmem198</b>   | 2.4325 | 2.9818  | 6.2986 | 0.0121 | 0.5668 | 1 | 0  | 0 | 0 | 0 | 0  | 0  | 6  | 0 | 2  |
| <b>A230009B1</b> | 2.4324 | -0.3275 | 3.8782 | 0.0489 | 0.8696 | 0 | 0  | 0 | 0 | 0 | 0  | 0  | 0  | 0 | 3  |
| <b>Gm31683</b>   | 2.4308 | 1.2799  | 4.1783 | 0.0409 | 0.8351 | 0 | 0  | 0 | 0 | 0 | 0  | 0  | 3  | 0 | 0  |
| <b>Olfr1033</b>  | 2.429  | 0.2861  | 4.0909 | 0.0431 | 0.849  | 0 | 0  | 0 | 0 | 0 | 0  | 0  | 3  | 0 | 0  |
| <b>Stfa2</b>     | 2.421  | -0.4683 | 4.2323 | 0.0397 | 0.8235 | 1 | 0  | 0 | 0 | 1 | 1  | 8  | 0  | 3 | 2  |
| <b>Il10ra</b>    | 2.3982 | 0.7062  | 4.7632 | 0.0291 | 0.7563 | 1 | 0  | 0 | 0 | 0 | 0  | 6  | 0  | 2 | 0  |
| <b>Ticam2</b>    | 2.3918 | -0.1092 | 4.4429 | 0.035  | 0.8062 | 0 | 0  | 0 | 1 | 1 | 3  | 8  | 1  | 2 | 0  |
| <b>Srl</b>       | 2.369  | 1.6663  | 11.027 | 0.0009 | 0.1888 | 0 | 2  | 0 | 3 | 0 | 1  | 7  | 10 | 2 | 7  |
| <b>Gm10432</b>   | 2.36   | 0.0429  | 3.8947 | 0.0484 | 0.8678 | 0 | 0  | 0 | 0 | 0 | 0  | 3  | 0  | 0 | 0  |
| <b>Tmem52</b>    | 2.3483 | -0.2015 | 4.0579 | 0.044  | 0.8533 | 1 | 1  | 4 | 0 | 0 | 4  | 0  | 10 | 8 | 1  |
| <b>Mpped1</b>    | 2.3447 | 1.2713  | 8.8951 | 0.0029 | 0.3276 | 5 | 0  | 0 | 0 | 0 | 10 | 7  | 0  | 6 | 2  |
| <b>Bglap3</b>    | 2.3445 | -0.2445 | 5.1745 | 0.0229 | 0.7051 | 1 | 0  | 1 | 2 | 2 | 2  | 20 | 10 | 0 | 8  |
| <b>Rgs11</b>     | 2.3384 | 0.5229  | 4.143  | 0.0418 | 0.8403 | 0 | 0  | 0 | 0 | 1 | 0  | 1  | 0  | 3 | 3  |
| <b>Ncf1</b>      | 2.3349 | 1.6756  | 5.3027 | 0.0213 | 0.6958 | 0 | 1  | 0 | 0 | 0 | 0  | 2  | 1  | 4 | 0  |
| <b>LOC105242</b> | 2.333  | -0.1182 | 4.2861 | 0.0384 | 0.8177 | 0 | 1  | 0 | 0 | 0 | 0  | 0  | 4  | 1 | 2  |
| <b>Cnrip1</b>    | 2.3024 | 4.4009  | 19.865 | 8E-06  | 0.0206 | 0 | 0  | 3 | 2 | 2 | 3  | 6  | 11 | 9 | 5  |
| <b>4931440P2</b> | 2.3    | 0.2527  | 8.5584 | 0.0034 | 0.3555 | 0 | 5  | 1 | 1 | 0 | 5  | 6  | 8  | 3 | 10 |
| <b>Tvp23bos</b>  | 2.2985 | 1.8735  | 14.338 | 0.0002 | 0.0808 | 7 | 3  | 2 | 1 | 0 | 9  | 36 | 16 | 2 | 5  |
| <b>Lin28b</b>    | 2.2809 | 1.5901  | 8.486  | 0.0036 | 0.3649 | 1 | 0  | 0 | 2 | 0 | 3  | 0  | 7  | 1 | 5  |
| <b>Azin2</b>     | 2.2792 | 3.7552  | 10.341 | 0.0013 | 0.2316 | 1 | 0  | 1 | 0 | 1 | 2  | 0  | 3  | 1 | 10 |
| <b>Tmem200c</b>  | 2.2687 | 1.2543  | 5.2143 | 0.0224 | 0.6995 | 0 | 1  | 0 | 0 | 0 | 0  | 0  | 2  | 0 | 5  |
| <b>Hmha1</b>     | 2.2684 | 1.3735  | 9.6004 | 0.0019 | 0.2767 | 5 | 1  | 0 | 0 | 1 | 7  | 8  | 15 | 2 | 4  |
| <b>Gm36478</b>   | 2.2524 | 0.7124  | 7.4894 | 0.0062 | 0.4459 | 0 | 1  | 3 | 0 | 0 | 0  | 7  | 7  | 4 | 1  |
| <b>Gm32954</b>   | 2.2457 | 0.4658  | 4.9223 | 0.0265 | 0.7377 | 0 | 0  | 1 | 1 | 0 | 1  | 12 | 0  | 0 | 0  |
| <b>Sdk1</b>      | 2.2422 | 3.414   | 5.328  | 0.021  | 0.6933 | 1 | 0  | 0 | 0 | 0 | 0  | 6  | 0  | 0 | 1  |
| <b>Radil</b>     | 2.2288 | 1.9864  | 6.5809 | 0.0103 | 0.5435 | 0 | 0  | 0 | 1 | 1 | 0  | 10 | 0  | 1 | 1  |
| <b>Tnfaip8l3</b> | 2.2287 | 0.3744  | 4.5983 | 0.032  | 0.7798 | 1 | 1  | 0 | 0 | 0 | 1  | 6  | 0  | 0 | 5  |
| <b>Pcdh10</b>    | 2.2031 | 4.6575  | 7.3984 | 0.0065 | 0.4569 | 1 | 0  | 1 | 0 | 0 | 0  | 8  | 0  | 1 | 2  |
| <b>Zswim5</b>    | 2.2018 | 1.9253  | 5.9357 | 0.0148 | 0.6085 | 0 | 1  | 2 | 0 | 0 | 14 | 0  | 0  | 0 | 0  |
| <b>Slc6a19</b>   | 2.1957 | 1.4252  | 4.6982 | 0.0302 | 0.7699 | 0 | 0  | 1 | 0 | 0 | 0  | 7  | 0  | 0 | 0  |
| <b>Tmem132e</b>  | 2.1924 | 5.5489  | 9.5841 | 0.002  | 0.2774 | 1 | 0  | 2 | 0 | 0 | 0  | 6  | 0  | 5 | 4  |
| <b>Siglecg</b>   | 2.1769 | 0.9546  | 14.949 | 0.0001 | 0.0662 | 2 | 3  | 9 | 2 | 2 | 7  | 27 | 16 | 9 | 18 |
| <b>4921504A2</b> | 2.15   | 1.6831  | 5.5913 | 0.018  | 0.6487 | 1 | 0  | 0 | 0 | 1 | 2  | 7  | 0  | 2 | 0  |
| <b>Ednra</b>     | 2.1399 | 1.8111  | 5.9578 | 0.0147 | 0.6066 | 0 | 2  | 0 | 0 | 0 | 0  | 1  | 6  | 3 | 0  |
| <b>LOC108167</b> | 2.1221 | 1.4052  | 7.4486 | 0.0063 | 0.4505 | 3 | 1  | 0 | 0 | 0 | 6  | 8  | 3  | 1 | 1  |
| <b>Dbp</b>       | 2.1107 | 0.7819  | 4.5228 | 0.0334 | 0.7916 | 0 | 13 | 2 | 2 | 0 | 5  | 37 | 13 | 7 | 2  |
| <b>Gm41883</b>   | 2.1056 | 0.5963  | 4.0542 | 0.0441 | 0.8533 | 0 | 3  | 0 | 0 | 0 | 6  | 0  | 0  | 0 | 7  |
| <b>BC048546</b>  | 2.0919 | 7.2328  | 10.452 | 0.0012 | 0.2316 | 1 | 0  | 3 | 0 | 0 | 0  | 9  | 6  | 1 | 2  |
| <b>Ngb</b>       | 2.0895 | 1.1879  | 4.962  | 0.0259 | 0.7335 | 0 | 0  | 0 | 2 | 0 | 2  | 8  | 0  | 0 | 1  |
| <b>Tubb3</b>     | 2.085  | 9.577   | 6.4349 | 0.0112 | 0.5522 | 0 | 0  | 0 | 0 | 2 | 0  | 0  | 0  | 3 | 7  |
| <b>Ubxn11</b>    | 2.0702 | 0.4683  | 5.6209 | 0.0177 | 0.643  | 3 | 0  | 2 | 0 | 0 | 11 | 10 | 2  | 0 | 0  |
| <b>Mirg</b>      | 2.0668 | 3.0401  | 4.1371 | 0.042  | 0.8418 | 0 | 1  | 0 | 0 | 0 | 0  | 0  | 3  | 0 | 3  |
| <b>Gm42372</b>   | 2.0619 | 3.6379  | 4.2562 | 0.0391 | 0.8215 | 0 | 0  | 1 | 0 | 0 | 0  | 0  | 6  | 0 | 0  |
| <b>Sult4a1</b>   | 2.0612 | 8.2555  | 4.3595 | 0.0368 | 0.8128 | 0 | 0  | 0 | 0 | 1 | 0  | 0  | 0  | 1 | 5  |
| <b>C1ql4</b>     | 2.0554 | 2.0972  | 4.111  | 0.0426 | 0.8447 | 1 | 0  | 0 | 0 | 0 | 0  | 0  | 4  | 0 | 2  |
| <b>Dok2</b>      | 2.0418 | 0.2338  | 4.1314 | 0.0421 | 0.8427 | 0 | 2  | 0 | 0 | 0 | 1  | 2  | 1  | 2 | 3  |
| <b>Lrrc73</b>    | 2.0398 | 3.2196  | 12.696 | 0.0004 | 0.1232 | 0 | 5  | 2 | 0 | 0 | 10 | 4  | 13 | 1 | 0  |

|           |        |         |        |        |        |   |    |    |    |   |    |    |    |    |    |
|-----------|--------|---------|--------|--------|--------|---|----|----|----|---|----|----|----|----|----|
| Myo1a     | 2.0353 | 5.4404  | 12.998 | 0.0003 | 0.1116 | 0 | 1  | 3  | 0  | 2 | 0  | 7  | 9  | 0  | 9  |
| Gm20684   | 2.0334 | -0.0791 | 4.1977 | 0.0405 | 0.8329 | 1 | 0  | 0  | 2  | 0 | 0  | 9  | 0  | 1  | 5  |
| 1700016C1 | 2.0124 | 0.0268  | 4.8643 | 0.0274 | 0.7467 | 3 | 8  | 0  | 0  | 0 | 9  | 3  | 13 | 5  | 7  |
| Pcdhb3    | 1.9768 | 1.1195  | 6.1911 | 0.0128 | 0.5841 | 2 | 0  | 1  | 0  | 0 | 4  | 2  | 6  | 0  | 1  |
| Kcne1     | 1.9713 | -0.1153 | 4.0095 | 0.0452 | 0.8577 | 3 | 0  | 2  | 1  | 0 | 4  | 9  | 0  | 0  | 13 |
| Samd11    | 1.9662 | 0.4124  | 5.8386 | 0.0157 | 0.6238 | 0 | 3  | 3  | 1  | 0 | 7  | 7  | 4  | 5  | 1  |
| Gm16432   | 1.9503 | 1.5625  | 6.4086 | 0.0114 | 0.5544 | 4 | 2  | 3  | 3  | 0 | 7  | 26 | 1  | 7  | 4  |
| Ggt7      | 1.9474 | 3.3042  | 16.73  | 4E-05  | 0.0442 | 3 | 5  | 2  | 3  | 0 | 23 | 19 | 0  | 0  | 7  |
| Vstm4     | 1.9363 | 2.4807  | 9.7842 | 0.0018 | 0.2615 | 1 | 4  | 0  | 0  | 1 | 3  | 13 | 8  | 0  | 0  |
| Gm33357   | 1.9355 | 0.1875  | 5.5405 | 0.0186 | 0.6585 | 0 | 0  | 11 | 3  | 0 | 6  | 23 | 6  | 3  | 13 |
| AI593442  | 1.932  | 5.8942  | 5.2652 | 0.0218 | 0.697  | 0 | 0  | 0  | 2  | 0 | 0  | 7  | 0  | 1  | 1  |
| Rin3      | 1.9268 | 0.7565  | 5.177  | 0.0229 | 0.7051 | 0 | 1  | 0  | 3  | 0 | 3  | 1  | 3  | 3  | 5  |
| L3mbtl1   | 1.9249 | 1.029   | 7.7597 | 0.0053 | 0.4269 | 2 | 2  | 3  | 0  | 0 | 3  | 9  | 9  | 3  | 2  |
| Cyp1b1    | 1.9213 | 2.8436  | 11.081 | 0.0009 | 0.1879 | 2 | 3  | 1  | 0  | 3 | 18 | 5  | 0  | 3  | 7  |
| LOC105245 | 1.9196 | -0.0789 | 4.9556 | 0.026  | 0.7335 | 0 | 2  | 0  | 2  | 0 | 1  | 0  | 8  | 2  | 4  |
| Fbxo44    | 1.9034 | 4.9918  | 17.2   | 3E-05  | 0.0415 | 1 | 4  | 1  | 5  | 0 | 0  | 25 | 11 | 1  | 4  |
| LOC108168 | 1.8482 | 0.6215  | 3.9861 | 0.0459 | 0.8611 | 0 | 1  | 2  | 0  | 0 | 5  | 7  | 0  | 0  | 0  |
| Kirrel3   | 1.8347 | 2.8196  | 8.3208 | 0.0039 | 0.375  | 0 | 0  | 3  | 1  | 1 | 8  | 0  | 2  | 1  | 7  |
| Gm2011    | 1.8116 | -0.2268 | 3.9038 | 0.0482 | 0.8678 | 0 | 0  | 0  | 3  | 1 | 0  | 7  | 2  | 2  | 5  |
| Amigo3    | 1.8109 | 4.009   | 15.57  | 8E-05  | 0.055  | 2 | 5  | 2  | 3  | 3 | 3  | 32 | 6  | 5  | 7  |
| Enpp6     | 1.8105 | 2.1922  | 3.9144 | 0.0479 | 0.8678 | 0 | 2  | 0  | 0  | 0 | 2  | 0  | 0  | 0  | 6  |
| Gm2573    | 1.7938 | 1.4209  | 5.2781 | 0.0216 | 0.6958 | 1 | 3  | 7  | 2  | 2 | 2  | 4  | 10 | 7  | 23 |
| Vwa5b2    | 1.7923 | 3.4223  | 6.0259 | 0.0141 | 0.604  | 0 | 4  | 0  | 0  | 0 | 3  | 2  | 7  | 2  | 0  |
| Gls2      | 1.7858 | 1.4063  | 3.8955 | 0.0484 | 0.8678 | 2 | 0  | 0  | 0  | 0 | 4  | 0  | 0  | 0  | 4  |
| Pcdhb19   | 1.7415 | 0.9971  | 6.9947 | 0.0082 | 0.4992 | 0 | 6  | 2  | 1  | 0 | 1  | 8  | 6  | 8  | 3  |
| Gal3st3   | 1.7254 | 1.8814  | 4.9285 | 0.0264 | 0.7377 | 0 | 3  | 1  | 0  | 2 | 8  | 0  | 12 | 0  | 0  |
| Rinl      | 1.7232 | 0.9633  | 5.4106 | 0.02   | 0.6772 | 0 | 3  | 3  | 0  | 2 | 6  | 0  | 8  | 6  | 3  |
| Adamts6   | 1.7084 | 0.4167  | 3.9344 | 0.0473 | 0.8678 | 0 | 1  | 1  | 0  | 1 | 0  | 3  | 8  | 0  | 0  |
| Armc2     | 1.7071 | 0.8545  | 4.9146 | 0.0266 | 0.7377 | 1 | 5  | 0  | 0  | 0 | 2  | 3  | 0  | 3  | 10 |
| Gpatch3   | 1.6896 | 1.1031  | 8.7521 | 0.0031 | 0.3382 | 2 | 1  | 5  | 3  | 3 | 6  | 20 | 5  | 4  | 11 |
| Zfp811    | 1.6856 | 2.0356  | 9.9093 | 0.0016 | 0.2583 | 2 | 3  | 6  | 4  | 3 | 1  | 33 | 10 | 6  | 9  |
| Fbxo16    | 1.6778 | 1.6975  | 4.8567 | 0.0275 | 0.7469 | 2 | 0  | 1  | 1  | 0 | 0  | 12 | 0  | 2  | 0  |
| Obsl1     | 1.6752 | 2.3872  | 8.1575 | 0.0043 | 0.3886 | 2 | 1  | 3  | 2  | 1 | 9  | 4  | 6  | 5  | 3  |
| Slc7a4    | 1.6538 | 3.2659  | 21.16  | 4E-06  | 0.0162 | 5 | 9  | 5  | 12 | 0 | 17 | 20 | 18 | 6  | 30 |
| Nrn1l     | 1.6305 | 2.8049  | 8.3132 | 0.0039 | 0.3756 | 1 | 4  | 0  | 1  | 2 | 3  | 11 | 0  | 0  | 11 |
| Scg2      | 1.6294 | 6.412   | 13.963 | 0.0002 | 0.0871 | 1 | 4  | 2  | 5  | 1 | 19 | 7  | 2  | 6  | 4  |
| Gm6637    | 1.6269 | -0.1334 | 4.117  | 0.0425 | 0.8438 | 1 | 2  | 3  | 2  | 1 | 8  | 3  | 8  | 1  | 7  |
| Gm34939   | 1.6162 | 0.8566  | 5.3883 | 0.0203 | 0.6822 | 4 | 4  | 5  | 4  | 3 | 7  | 39 | 18 | 0  | 5  |
| Fcrls     | 1.6063 | 1.6387  | 4.0584 | 0.044  | 0.8533 | 0 | 0  | 4  | 0  | 0 | 0  | 0  | 10 | 2  | 0  |
| Trim46    | 1.6053 | 3.0118  | 5.5025 | 0.019  | 0.6647 | 4 | 0  | 1  | 0  | 0 | 1  | 0  | 2  | 4  | 8  |
| Dcaf12l2  | 1.6047 | 0.4182  | 5.1626 | 0.0231 | 0.707  | 8 | 3  | 1  | 9  | 0 | 21 | 20 | 6  | 8  | 5  |
| Zfp454    | 1.5944 | 1.1737  | 3.8619 | 0.0494 | 0.8719 | 1 | 3  | 0  | 0  | 2 | 4  | 3  | 1  | 7  | 1  |
| Gm28609   | 1.5798 | 0.7643  | 4.0661 | 0.0438 | 0.8517 | 3 | 12 | 0  | 4  | 7 | 13 | 15 | 34 | 11 | 2  |
| Gm40695   | 1.579  | 1.7507  | 6.0562 | 0.0139 | 0.6019 | 0 | 2  | 5  | 1  | 0 | 4  | 12 | 7  | 0  | 1  |
| Gm30554   | 1.5742 | 0.4718  | 4.4694 | 0.0345 | 0.8015 | 3 | 1  | 6  | 0  | 0 | 2  | 12 | 7  | 4  | 3  |
| Apoo      | 1.5443 | 1.5823  | 6.7117 | 0.0096 | 0.525  | 3 | 1  | 0  | 6  | 2 | 8  | 24 | 1  | 2  | 3  |
| Pkd2l1    | 1.5191 | 0.6566  | 4.2386 | 0.0395 | 0.823  | 0 | 6  | 1  | 2  | 1 | 10 | 6  | 6  | 3  | 1  |
| Fbln7     | 1.4992 | 2.3575  | 5.2862 | 0.0215 | 0.6958 | 0 | 12 | 0  | 0  | 1 | 15 | 18 | 0  | 0  | 2  |
| Dcdc2b    | 1.441  | 0.4531  | 4.3744 | 0.0365 | 0.8112 | 3 | 1  | 6  | 0  | 3 | 8  | 18 | 4  | 2  | 5  |
| Creg2     | 1.4353 | 3.9036  | 7.0215 | 0.0081 | 0.499  | 0 | 0  | 11 | 6  | 0 | 1  | 7  | 3  | 21 | 3  |
| Tmem100   | 1.4339 | 4.6173  | 5.3145 | 0.0211 | 0.6958 | 1 | 0  | 3  | 2  | 0 | 4  | 0  | 11 | 1  | 0  |
| Echdc2    | 1.4226 | 2.2386  | 15.576 | 8E-05  | 0.055  | 6 | 24 | 7  | 9  | 7 | 14 | 52 | 28 | 10 | 32 |
| Eif5a     | 1.3953 | 1.817   | 7.9752 | 0.0047 | 0.4019 | 5 | 24 | 7  | 0  | 7 | 11 | 62 | 11 | 8  | 19 |
| Kcna6     | 1.3861 | 6.161   | 7.0204 | 0.0081 | 0.499  | 6 | 0  | 0  | 3  | 0 | 3  | 9  | 5  | 0  | 6  |
| A330069E1 | 1.3682 | 2.0629  | 5.0433 | 0.0247 | 0.7217 | 2 | 1  | 7  | 4  | 0 | 8  | 8  | 9  | 2  | 7  |
| Tmem240   | 1.3679 | 1.7154  | 4.845  | 0.0277 | 0.747  | 4 | 2  | 1  | 0  | 1 | 5  | 9  | 4  | 0  | 3  |
| C330013E1 | 1.3625 | 1.3847  | 5.835  | 0.0157 | 0.6238 | 5 | 11 | 4  | 11 | 2 | 24 | 29 | 3  | 9  | 13 |
| Lurap1    | 1.3542 | 2.2509  | 4.0746 | 0.0435 | 0.85   | 1 | 6  | 0  | 0  | 0 | 3  | 0  | 11 | 0  | 3  |
| Zfp783    | 1.3295 | 1.2313  | 4.8293 | 0.028  | 0.7488 | 1 | 4  | 0  | 4  | 4 | 5  | 5  | 18 | 2  | 3  |
| Fhod3     | 1.3249 | 3.3177  | 10.349 | 0.0013 | 0.2316 | 5 | 2  | 9  | 3  | 2 | 10 | 22 | 11 | 2  | 6  |
| Acacb     | 1.308  | 2.3173  | 8.0434 | 0.0046 | 0.3978 | 7 | 3  | 0  | 5  | 1 | 7  | 8  | 7  | 3  | 13 |
| D630045J1 | 1.3068 | 3.4204  | 7.196  | 0.0073 | 0.4797 | 6 | 0  | 3  | 1  | 3 | 3  | 15 | 8  | 2  | 4  |

|                 |        |        |        |        |        |    |    |    |    |    |    |    |    |    |    |
|-----------------|--------|--------|--------|--------|--------|----|----|----|----|----|----|----|----|----|----|
| <b>Ndst3</b>    | 1.2961 | 3.231  | 8.3342 | 0.0039 | 0.3742 | 0  | 10 | 3  | 0  | 2  | 5  | 11 | 7  | 0  | 12 |
| <b>Serp2</b>    | 1.2809 | 5.0201 | 6.5313 | 0.0106 | 0.546  | 0  | 2  | 9  | 0  | 0  | 15 | 0  | 6  | 2  | 2  |
| <b>Nr1h3</b>    | 1.2764 | 2.4537 | 6.4366 | 0.0112 | 0.5522 | 0  | 4  | 12 | 0  | 0  | 7  | 15 | 9  | 2  | 3  |
| <b>Plppr3</b>   | 1.2626 | 3.1535 | 4.3727 | 0.0365 | 0.8115 | 2  | 0  | 3  | 0  | 3  | 0  | 11 | 0  | 5  | 3  |
| <b>Zfp759</b>   | 1.2594 | 1.9483 | 9.7112 | 0.0018 | 0.2651 | 7  | 11 | 20 | 11 | 10 | 24 | 25 | 31 | 22 | 24 |
| <b>Rtn2</b>     | 1.2473 | 5.3868 | 6.009  | 0.0142 | 0.604  | 7  | 0  | 0  | 3  | 0  | 2  | 9  | 6  | 0  | 6  |
| <b>Lancl3</b>   | 1.2291 | 3.2078 | 6.5498 | 0.0105 | 0.5454 | 1  | 3  | 8  | 1  | 1  | 7  | 12 | 8  | 3  | 1  |
| <b>Camk1</b>    | 1.2252 | 2.4995 | 8.7719 | 0.0031 | 0.3382 | 3  | 6  | 11 | 4  | 7  | 11 | 35 | 11 | 10 | 3  |
| <b>Fgf14</b>    | 1.2241 | 2.7455 | 7.2074 | 0.0073 | 0.4784 | 6  | 4  | 13 | 13 | 7  | 5  | 42 | 33 | 9  | 13 |
| <b>Mirc35hg</b> | 1.2165 | 2.7892 | 4.6494 | 0.0311 | 0.7726 | 2  | 5  | 6  | 3  | 0  | 15 | 6  | 2  | 3  | 7  |
| <b>Slc24a3</b>  | 1.2124 | 5.5637 | 13.209 | 0.0003 | 0.1101 | 12 | 14 | 10 | 10 | 2  | 24 | 58 | 11 | 1  | 16 |
| <b>Dclk2</b>    | 1.2102 | 5.3325 | 4.5034 | 0.0338 | 0.7954 | 2  | 5  | 0  | 0  | 1  | 4  | 8  | 5  | 1  | 0  |
| <b>Rbm12b1</b>  | 1.2091 | 1.4867 | 5.1335 | 0.0235 | 0.7095 | 4  | 14 | 2  | 4  | 3  | 17 | 15 | 19 | 2  | 6  |
| <b>Igln5</b>    | 1.2036 | 4.8875 | 7.2894 | 0.0069 | 0.4711 | 3  | 2  | 6  | 4  | 4  | 14 | 14 | 13 | 0  | 2  |
| <b>Tomm5</b>    | 1.2002 | 2.3294 | 7.0968 | 0.0077 | 0.4918 | 1  | 3  | 17 | 9  | 4  | 11 | 18 | 11 | 6  | 27 |
| <b>Rhof</b>     | 1.1912 | 3.524  | 6.7142 | 0.0096 | 0.525  | 0  | 2  | 11 | 5  | 3  | 12 | 27 | 3  | 0  | 6  |
| <b>Kcnk13</b>   | 1.1875 | 1.529  | 8.0987 | 0.0044 | 0.3937 | 4  | 3  | 7  | 5  | 1  | 7  | 12 | 7  | 3  | 14 |
| <b>Fam69b</b>   | 1.1621 | 5.4321 | 13.135 | 0.0003 | 0.1116 | 5  | 0  | 15 | 8  | 6  | 11 | 28 | 22 | 3  | 9  |
| <b>Filip1</b>   | 1.1504 | 4.8424 | 4.6581 | 0.0309 | 0.7726 | 5  | 3  | 1  | 1  | 0  | 0  | 21 | 0  | 1  | 0  |
| <b>Fcgr3</b>    | 1.1405 | 2.3061 | 5.697  | 0.017  | 0.6337 | 8  | 10 | 5  | 2  | 2  | 14 | 23 | 6  | 3  | 11 |
| <b>Gria2</b>    | 1.1389 | 4.818  | 9.9401 | 0.0016 | 0.2574 | 5  | 12 | 2  | 7  | 0  | 13 | 8  | 23 | 3  | 6  |
| <b>Dalrd3</b>   | 1.1376 | 1.6853 | 5.2419 | 0.022  | 0.6995 | 2  | 10 | 11 | 4  | 4  | 3  | 27 | 11 | 9  | 13 |
| <b>Tspyl3</b>   | 1.1342 | 2.4191 | 4.4538 | 0.0348 | 0.8037 | 7  | 2  | 0  | 4  | 1  | 4  | 0  | 7  | 7  | 10 |
| <b>Spink10</b>  | 1.1339 | 2.599  | 8.7176 | 0.0032 | 0.3385 | 9  | 11 | 30 | 6  | 10 | 23 | 51 | 22 | 21 | 15 |
| <b>Abcb1a</b>   | 1.1257 | 4.1697 | 4.3132 | 0.0378 | 0.8131 | 4  | 4  | 0  | 2  | 0  | 6  | 5  | 7  | 0  | 3  |
| <b>S1pr2</b>    | 1.1147 | 2.3042 | 5.8277 | 0.0158 | 0.6251 | 7  | 13 | 24 | 1  | 6  | 11 | 51 | 26 | 3  | 18 |
| <b>Wdr54</b>    | 1.109  | 2.9125 | 5.1979 | 0.0226 | 0.7032 | 1  | 5  | 5  | 0  | 3  | 9  | 13 | 2  | 1  | 4  |
| <b>Usp27x</b>   | 1.1061 | 0.9056 | 4.764  | 0.0291 | 0.7563 | 4  | 3  | 12 | 5  | 0  | 10 | 13 | 5  | 4  | 15 |
| <b>Lix1l</b>    | 1.1016 | 2.2033 | 5.1377 | 0.0234 | 0.7084 | 5  | 6  | 10 | 2  | 5  | 5  | 32 | 3  | 3  | 18 |
| <b>Fam20c</b>   | 1.0803 | 4.0657 | 8.6742 | 0.0032 | 0.3425 | 3  | 4  | 16 | 2  | 4  | 7  | 16 | 14 | 11 | 8  |
| <b>Rab6b</b>    | 1.0795 | 8.8355 | 8.9566 | 0.0028 | 0.324  | 7  | 7  | 5  | 1  | 5  | 16 | 0  | 18 | 4  | 11 |
| <b>Gpr155</b>   | 1.078  | 4.1895 | 8.0819 | 0.0045 | 0.3937 | 8  | 4  | 8  | 3  | 1  | 9  | 15 | 14 | 1  | 9  |
| <b>Gbp3</b>     | 1.075  | 2.8373 | 7.4039 | 0.0065 | 0.4564 | 21 | 25 | 16 | 18 | 3  | 22 | 32 | 49 | 25 | 22 |
| <b>Fam43b</b>   | 1.0738 | 4.568  | 6.1908 | 0.0128 | 0.5841 | 0  | 1  | 5  | 5  | 6  | 4  | 20 | 4  | 1  | 6  |
| <b>Ltf</b>      | 1.0735 | 2.1452 | 4.7977 | 0.0285 | 0.7527 | 1  | 44 | 29 | 17 | 12 | 25 | 44 | 32 | 21 | 66 |
| <b>Armcx3</b>   | 1.0728 | 3.9705 | 5.0841 | 0.0241 | 0.7184 | 5  | 0  | 7  | 0  | 3  | 8  | 0  | 15 | 0  | 7  |
| <b>Gm5113</b>   | 1.0545 | 2.0446 | 5.1576 | 0.0231 | 0.7074 | 4  | 5  | 3  | 13 | 4  | 12 | 14 | 20 | 4  | 9  |
| <b>Immp2l</b>   | 1.0542 | 2.0445 | 4.2483 | 0.0393 | 0.8224 | 1  | 6  | 5  | 4  | 1  | 6  | 13 | 4  | 0  | 11 |
| <b>Rnls</b>     | 1.0521 | 0.9901 | 4.0864 | 0.0432 | 0.85   | 5  | 11 | 6  | 6  | 2  | 16 | 17 | 5  | 10 | 6  |
| <b>Eaf2</b>     | 1.0368 | 0.9604 | 5.4672 | 0.0194 | 0.6697 | 9  | 6  | 12 | 6  | 5  | 6  | 24 | 17 | 11 | 15 |
| <b>Zfp939</b>   | 1.0366 | 2.3597 | 4.8543 | 0.0276 | 0.7469 | 26 | 28 | 6  | 5  | 5  | 24 | 42 | 36 | 4  | 34 |
| <b>Ccdc138</b>  | 1.0342 | 1.4366 | 4.3022 | 0.0381 | 0.8131 | 3  | 11 | 11 | 7  | 2  | 10 | 8  | 33 | 5  | 6  |
| <b>Hexim2</b>   | 1.0222 | 2.4987 | 6.5953 | 0.0102 | 0.5434 | 5  | 22 | 16 | 11 | 2  | 30 | 41 | 14 | 7  | 11 |
| <b>Cfap100</b>  | 1.0212 | 3.8222 | 4.6248 | 0.0315 | 0.7738 | 5  | 5  | 2  | 2  | 1  | 5  | 13 | 2  | 3  | 6  |
| <b>Cntnap4</b>  | 1.0184 | 3.1372 | 3.9742 | 0.0462 | 0.8611 | 2  | 4  | 5  | 3  | 3  | 1  | 16 | 0  | 2  | 15 |
| <b>Prx</b>      | 1.0168 | 7.3955 | 5.4512 | 0.0196 | 0.6713 | 0  | 5  | 1  | 3  | 7  | 2  | 11 | 7  | 1  | 10 |
| <b>Afap11l</b>  | 1.012  | 2.695  | 6.4674 | 0.011  | 0.5486 | 12 | 14 | 16 | 2  | 7  | 7  | 19 | 22 | 4  | 46 |
| <b>Rnf122</b>   | 1.0088 | 3.5247 | 5.6486 | 0.0175 | 0.6381 | 4  | 5  | 13 | 7  | 2  | 3  | 12 | 30 | 2  | 12 |
| <b>Zfp874a</b>  | 1.0075 | 2.7884 | 9.5599 | 0.002  | 0.2785 | 10 | 17 | 22 | 9  | 7  | 6  | 26 | 44 | 14 | 29 |
| <b>Trib3</b>    | 1.0022 | 1.7691 | 7.9628 | 0.0048 | 0.4019 | 15 | 12 | 11 | 13 | 10 | 14 | 43 | 20 | 19 | 20 |
| <b>Kcnc3</b>    | 0.9888 | 6.7981 | 9.4519 | 0.0021 | 0.2865 | 16 | 5  | 8  | 2  | 2  | 3  | 35 | 10 | 8  | 6  |
| <b>Brdt</b>     | 0.9854 | 3.3223 | 5.2394 | 0.0221 | 0.6995 | 14 | 3  | 5  | 6  | 1  | 5  | 19 | 13 | 12 | 4  |
| <b>H2-DMb1</b>  | 0.9806 | 3.8725 | 11.999 | 0.0005 | 0.151  | 26 | 21 | 41 | 11 | 9  | 50 | 41 | 58 | 19 | 24 |
| <b>Cercam</b>   | 0.9707 | 2.4822 | 5.0334 | 0.0249 | 0.7219 | 2  | 20 | 12 | 7  | 2  | 18 | 35 | 7  | 3  | 15 |
| <b>Tmem45b</b>  | 0.9696 | 3.2328 | 5.532  | 0.0187 | 0.6586 | 4  | 3  | 5  | 3  | 8  | 13 | 5  | 12 | 3  | 10 |
| <b>Mylk3</b>    | 0.9504 | 1.2243 | 3.9951 | 0.0456 | 0.8597 | 11 | 13 | 12 | 7  | 9  | 33 | 28 | 14 | 10 | 10 |
| <b>Hacl1</b>    | 0.9502 | 2.3345 | 8.3279 | 0.0039 | 0.3745 | 24 | 13 | 22 | 19 | 7  | 31 | 48 | 21 | 15 | 40 |
| <b>Napb</b>     | 0.9497 | 5.3558 | 3.9355 | 0.0473 | 0.8678 | 2  | 0  | 7  | 3  | 1  | 2  | 16 | 0  | 1  | 5  |
| <b>Sgcd</b>     | 0.9234 | 5.0296 | 7.3769 | 0.0066 | 0.4606 | 5  | 17 | 1  | 5  | 5  | 3  | 28 | 21 | 1  | 7  |
| <b>Zfp868</b>   | 0.9224 | 2.6012 | 8.0797 | 0.0045 | 0.3937 | 19 | 19 | 22 | 15 | 12 | 20 | 17 | 50 | 24 | 36 |
| <b>Fbxo2</b>    | 0.909  | 8.0864 | 5.7682 | 0.0163 | 0.6285 | 3  | 7  | 0  | 11 | 2  | 11 | 5  | 8  | 8  | 8  |
| <b>Tor2a</b>    | 0.9067 | 1.8247 | 6.6206 | 0.0101 | 0.5413 | 11 | 22 | 22 | 18 | 7  | 15 | 45 | 23 | 20 | 32 |

|           |        |        |        |        |        |     |     |     |     |     |     |     |     |     |     |
|-----------|--------|--------|--------|--------|--------|-----|-----|-----|-----|-----|-----|-----|-----|-----|-----|
| Ahr       | 0.9038 | 3.0744 | 7.6081 | 0.0058 | 0.4373 | 46  | 26  | 35  | 19  | 19  | 56  | 27  | 51  | 33  | 78  |
| Arhgap31  | 0.8911 | 4.4979 | 5.3001 | 0.0213 | 0.6958 | 25  | 5   | 8   | 2   | 13  | 12  | 25  | 25  | 15  | 20  |
| Arxes2    | 0.8872 | 3.9578 | 5.237  | 0.0221 | 0.6995 | 2   | 15  | 20  | 2   | 1   | 24  | 7   | 5   | 11  | 14  |
| Zfp93     | 0.8836 | 2.495  | 7.6704 | 0.0056 | 0.434  | 19  | 23  | 28  | 10  | 10  | 21  | 55  | 25  | 21  | 30  |
| Gapdh     | 0.8821 | 4.8692 | 7.1263 | 0.0076 | 0.4871 | 39  | 53  | 43  | 23  | 38  | 30  | 84  | 55  | 61  | 99  |
| Tmem25    | 0.8752 | 5.3243 | 6.5981 | 0.0102 | 0.5433 | 7   | 10  | 12  | 1   | 11  | 0   | 24  | 33  | 5   | 11  |
| Sipa1     | 0.875  | 3.1564 | 7.634  | 0.0057 | 0.4356 | 12  | 17  | 12  | 9   | 2   | 23  | 22  | 20  | 4   | 19  |
| Dand5     | 0.8748 | 2.7933 | 4.4404 | 0.0351 | 0.8064 | 14  | 10  | 11  | 17  | 9   | 12  | 5   | 43  | 19  | 21  |
| Pear1     | 0.8742 | 2.3012 | 6.5148 | 0.0107 | 0.546  | 16  | 15  | 6   | 6   | 17  | 24  | 19  | 25  | 13  | 25  |
| Ttc21b    | 0.87   | 2.5131 | 5.42   | 0.0199 | 0.6771 | 11  | 10  | 16  | 5   | 3   | 8   | 16  | 10  | 20  | 16  |
| Akr1b8    | 0.8663 | 2.2981 | 4.9496 | 0.0261 | 0.7335 | 10  | 24  | 27  | 13  | 6   | 43  | 13  | 31  | 12  | 26  |
| Shisa2    | 0.8595 | 2.2381 | 6.5758 | 0.0103 | 0.5435 | 20  | 25  | 20  | 14  | 12  | 26  | 24  | 45  | 15  | 42  |
| Naalad2   | 0.8524 | 2.4546 | 4.4853 | 0.0342 | 0.7986 | 13  | 18  | 31  | 10  | 16  | 26  | 58  | 29  | 22  | 14  |
| Creb5     | 0.8502 | 3.8531 | 5.1063 | 0.0238 | 0.7155 | 23  | 20  | 8   | 9   | 0   | 23  | 12  | 42  | 7   | 13  |
| Catsper2  | 0.8484 | 1.9078 | 4.2204 | 0.0399 | 0.8263 | 10  | 11  | 19  | 10  | 6   | 9   | 35  | 23  | 7   | 23  |
| Fads3     | 0.8479 | 3.6058 | 8.5812 | 0.0034 | 0.3532 | 11  | 15  | 19  | 13  | 2   | 24  | 15  | 37  | 7   | 15  |
| Armcx1    | 0.8478 | 5.0558 | 5.5409 | 0.0186 | 0.6585 | 3   | 4   | 20  | 0   | 1   | 8   | 17  | 10  | 0   | 12  |
| Col5a3    | 0.843  | 5.3368 | 4.6947 | 0.0303 | 0.7699 | 9   | 5   | 7   | 0   | 2   | 7   | 18  | 7   | 2   | 5   |
| B9d1      | 0.8395 | 3.25   | 5.9438 | 0.0148 | 0.6079 | 15  | 39  | 55  | 25  | 25  | 70  | 54  | 33  | 27  | 74  |
| Timeless  | 0.8351 | 3.6541 | 11.055 | 0.0009 | 0.1883 | 24  | 53  | 32  | 39  | 10  | 55  | 92  | 59  | 15  | 43  |
| 5930412G1 | 0.8327 | 1.9612 | 3.9341 | 0.0473 | 0.8678 | 9   | 31  | 5   | 12  | 5   | 19  | 28  | 25  | 12  | 14  |
| Galns     | 0.8296 | 2.1894 | 4.5178 | 0.0335 | 0.7919 | 32  | 12  | 21  | 14  | 12  | 42  | 64  | 35  | 10  | 13  |
| Lrrk2     | 0.817  | 4.1271 | 3.9766 | 0.0461 | 0.8611 | 5   | 2   | 14  | 6   | 4   | 16  | 5   | 12  | 8   | 8   |
| 1810043G1 | 0.8161 | 4.2241 | 10.339 | 0.0013 | 0.2316 | 23  | 37  | 25  | 33  | 7   | 49  | 74  | 44  | 10  | 31  |
| Pex12     | 0.8137 | 2.8973 | 6.9976 | 0.0082 | 0.4992 | 23  | 58  | 41  | 26  | 18  | 51  | 35  | 66  | 26  | 79  |
| Mypop     | 0.8111 | 4.1724 | 4.0554 | 0.044  | 0.8533 | 6   | 10  | 2   | 9   | 0   | 10  | 14  | 11  | 4   | 5   |
| Gprasp2   | 0.8026 | 5.8317 | 8.1322 | 0.0043 | 0.3911 | 9   | 10  | 15  | 9   | 10  | 21  | 33  | 19  | 9   | 5   |
| Tgif2     | 0.7932 | 2.9249 | 9.8395 | 0.0017 | 0.261  | 27  | 38  | 47  | 29  | 14  | 51  | 68  | 63  | 18  | 49  |
| Oxld1     | 0.7905 | 2.3119 | 4.0018 | 0.0455 | 0.8587 | 16  | 5   | 16  | 11  | 11  | 28  | 14  | 24  | 7   | 26  |
| Dpp4      | 0.7781 | 2.8949 | 8.4309 | 0.0037 | 0.3687 | 38  | 63  | 46  | 28  | 10  | 46  | 61  | 40  | 37  | 89  |
| Robo1     | 0.7689 | 3.0133 | 4.0217 | 0.0449 | 0.8577 | 7   | 24  | 17  | 6   | 1   | 17  | 9   | 33  | 7   | 14  |
| Dlg4      | 0.7688 | 5.8854 | 7.4067 | 0.0065 | 0.4564 | 17  | 6   | 23  | 8   | 8   | 12  | 55  | 15  | 6   | 15  |
| Fermt3    | 0.7686 | 2.7068 | 4.5917 | 0.0321 | 0.7798 | 33  | 56  | 47  | 54  | 18  | 34  | 56  | 52  | 46  | 120 |
| Prrt1     | 0.7679 | 3.0869 | 3.9757 | 0.0462 | 0.8611 | 6   | 3   | 19  | 5   | 3   | 3   | 21  | 20  | 4   | 10  |
| Plekho2   | 0.7563 | 2.8044 | 4.4836 | 0.0342 | 0.7989 | 11  | 16  | 22  | 11  | 2   | 25  | 10  | 25  | 7   | 25  |
| Rnbf2     | 0.7557 | 2.884  | 4.3046 | 0.038  | 0.8131 | 18  | 23  | 17  | 23  | 4   | 19  | 23  | 18  | 24  | 38  |
| Fam149a   | 0.7542 | 3.5194 | 3.9745 | 0.0462 | 0.8611 | 4   | 8   | 9   | 3   | 5   | 12  | 14  | 12  | 2   | 6   |
| Tmem29    | 0.7501 | 3.3735 | 8.2467 | 0.0041 | 0.3832 | 36  | 40  | 38  | 27  | 16  | 35  | 42  | 65  | 31  | 64  |
| Uxt       | 0.7472 | 2.726  | 5.2331 | 0.0222 | 0.6995 | 30  | 41  | 15  | 22  | 6   | 44  | 31  | 22  | 24  | 44  |
| 4930430F0 | 0.7388 | 3.7772 | 8.2197 | 0.0041 | 0.3832 | 15  | 35  | 25  | 36  | 15  | 29  | 41  | 55  | 16  | 55  |
| Particl   | 0.7358 | 2.5513 | 4.1004 | 0.0429 | 0.8461 | 8   | 21  | 6   | 9   | 3   | 16  | 23  | 10  | 8   | 14  |
| Ap1g2     | 0.7267 | 2.1332 | 3.878  | 0.0489 | 0.8696 | 24  | 38  | 18  | 16  | 19  | 30  | 71  | 25  | 21  | 36  |
| Ccdc28a   | 0.7249 | 5.3755 | 11.807 | 0.0006 | 0.1573 | 19  | 40  | 29  | 32  | 19  | 45  | 92  | 50  | 9   | 26  |
| Ppm1m     | 0.72   | 2.9343 | 4.0173 | 0.045  | 0.8577 | 12  | 20  | 19  | 8   | 3   | 8   | 37  | 39  | 5   | 7   |
| Sh3pxd2b  | 0.7193 | 4.5583 | 11.342 | 0.0008 | 0.1795 | 34  | 48  | 21  | 31  | 9   | 49  | 64  | 48  | 19  | 37  |
| Snx21     | 0.7156 | 3.5698 | 6.4639 | 0.011  | 0.5486 | 11  | 33  | 33  | 15  | 14  | 37  | 46  | 22  | 5   | 54  |
| Rtp4      | 0.714  | 3.6326 | 4.8073 | 0.0283 | 0.7513 | 51  | 129 | 46  | 74  | 28  | 56  | 125 | 40  | 100 | 118 |
| Colgalt2  | 0.709  | 4.0511 | 5.9306 | 0.0149 | 0.6085 | 12  | 25  | 22  | 10  | 12  | 42  | 23  | 24  | 14  | 16  |
| Trappc2   | 0.7054 | 4.1983 | 4.3371 | 0.0373 | 0.8131 | 8   | 10  | 12  | 8   | 9   | 6   | 16  | 17  | 8   | 25  |
| Gusb      | 0.7051 | 3.3502 | 5.7795 | 0.0162 | 0.6285 | 27  | 29  | 50  | 27  | 31  | 71  | 55  | 37  | 38  | 43  |
| Il1rap    | 0.7022 | 2.4927 | 4.0063 | 0.0453 | 0.8577 | 9   | 16  | 16  | 7   | 3   | 12  | 26  | 14  | 7   | 17  |
| Adamts1   | 0.6995 | 4.1029 | 5.4216 | 0.0199 | 0.6771 | 43  | 34  | 83  | 82  | 38  | 75  | 140 | 176 | 26  | 41  |
| Slc30a5   | 0.6994 | 3.4628 | 6.7057 | 0.0096 | 0.525  | 27  | 30  | 43  | 40  | 20  | 35  | 61  | 54  | 20  | 77  |
| Abhd11    | 0.6987 | 2.5541 | 4.4175 | 0.0356 | 0.811  | 30  | 28  | 20  | 22  | 9   | 26  | 71  | 20  | 12  | 43  |
| LOC108167 | 0.697  | 3.6349 | 10.132 | 0.0015 | 0.2468 | 26  | 46  | 29  | 21  | 25  | 60  | 64  | 55  | 16  | 30  |
| B3galt5   | 0.6966 | 3.7808 | 4.9641 | 0.0259 | 0.7335 | 7   | 15  | 12  | 11  | 11  | 24  | 9   | 11  | 13  | 25  |
| Pfkip     | 0.6925 | 6.944  | 16.307 | 5E-05  | 0.0461 | 51  | 70  | 53  | 35  | 22  | 82  | 56  | 73  | 48  | 72  |
| Angptl7   | 0.6876 | 5.5251 | 6.0366 | 0.014  | 0.604  | 132 | 514 | 618 | 266 | 124 | 255 | 659 | 952 | 172 | 337 |
| Gab2      | 0.6819 | 4.5415 | 4.5445 | 0.033  | 0.7852 | 13  | 22  | 7   | 13  | 8   | 7   | 26  | 14  | 28  | 13  |
| H1fx      | 0.6782 | 4.7366 | 5.0257 | 0.025  | 0.7219 | 19  | 7   | 29  | 17  | 9   | 10  | 36  | 24  | 28  | 18  |
| Atp6v0e2  | 0.6775 | 7.4838 | 18.717 | 2E-05  | 0.0264 | 33  | 65  | 55  | 43  | 37  | 75  | 84  | 83  | 43  | 57  |
| Nin       | 0.6759 | 3.815  | 6.5565 | 0.0105 | 0.5454 | 23  | 21  | 19  | 15  | 5   | 27  | 49  | 14  | 11  | 23  |

|                 |        |        |        |        |        |     |     |     |     |     |     |     |     |     |     |
|-----------------|--------|--------|--------|--------|--------|-----|-----|-----|-----|-----|-----|-----|-----|-----|-----|
| <b>Kyat3</b>    | 0.675  | 2.9849 | 4.5481 | 0.033  | 0.7852 | 39  | 45  | 44  | 54  | 17  | 33  | 62  | 93  | 26  | 82  |
| <b>Cenpt</b>    | 0.6729 | 2.4231 | 4.1541 | 0.0415 | 0.8377 | 18  | 32  | 38  | 18  | 20  | 41  | 37  | 44  | 17  | 47  |
| <b>Fbxl18</b>   | 0.6726 | 3.2992 | 4.3263 | 0.0375 | 0.8131 | 12  | 23  | 38  | 25  | 17  | 20  | 55  | 37  | 28  | 27  |
| <b>Fbl</b>      | 0.6721 | 2.9162 | 4.9054 | 0.0268 | 0.7377 | 35  | 35  | 39  | 42  | 30  | 59  | 47  | 88  | 24  | 59  |
| <b>Tmsb10</b>   | 0.668  | 6.0001 | 6.5534 | 0.0105 | 0.5454 | 62  | 81  | 54  | 47  | 81  | 85  | 89  | 84  | 100 | 115 |
| <b>Rarres1</b>  | 0.6655 | 4.8116 | 8.0528 | 0.0045 | 0.3978 | 18  | 64  | 28  | 21  | 13  | 39  | 32  | 45  | 30  | 51  |
| <b>Lmnb2</b>    | 0.6644 | 3.7546 | 11.542 | 0.0007 | 0.171  | 69  | 97  | 88  | 59  | 40  | 96  | 126 | 114 | 43  | 140 |
| <b>Apbb1</b>    | 0.6613 | 6.9813 | 8.7257 | 0.0031 | 0.3385 | 20  | 23  | 35  | 10  | 5   | 36  | 32  | 30  | 11  | 25  |
| <b>Ttc32</b>    | 0.6583 | 2.5992 | 3.9718 | 0.0463 | 0.8616 | 16  | 34  | 54  | 19  | 10  | 37  | 56  | 37  | 10  | 52  |
| <b>Ptchd1</b>   | 0.657  | 2.4063 | 3.9966 | 0.0456 | 0.8597 | 4   | 17  | 26  | 12  | 15  | 25  | 14  | 36  | 13  | 18  |
| <b>Ostm1</b>    | 0.6482 | 4.2969 | 9.2944 | 0.0023 | 0.3074 | 42  | 66  | 59  | 63  | 22  | 41  | 119 | 64  | 39  | 103 |
| <b>Fxyd6</b>    | 0.6398 | 6.3113 | 6.4915 | 0.0108 | 0.5486 | 31  | 26  | 35  | 3   | 2   | 17  | 57  | 23  | 22  | 17  |
| <b>Zfp358</b>   | 0.6392 | 3.5803 | 6.0423 | 0.014  | 0.604  | 37  | 42  | 42  | 42  | 23  | 59  | 104 | 57  | 29  | 27  |
| <b>Gnaz</b>     | 0.6384 | 6.2114 | 4.8519 | 0.0276 | 0.7469 | 18  | 15  | 5   | 12  | 1   | 5   | 42  | 8   | 8   | 12  |
| <b>Scarf2</b>   | 0.638  | 2.4647 | 4.7057 | 0.0301 | 0.7694 | 36  | 37  | 33  | 15  | 20  | 26  | 64  | 66  | 19  | 35  |
| <b>Pop4</b>     | 0.6356 | 4.8316 | 4.7795 | 0.0288 | 0.7541 | 93  | 201 | 96  | 78  | 56  | 127 | 178 | 96  | 97  | 212 |
| <b>Cebpd</b>    | 0.6311 | 3.0602 | 5.2721 | 0.0217 | 0.6958 | 19  | 29  | 30  | 27  | 12  | 21  | 47  | 35  | 15  | 51  |
| <b>Matn2</b>    | 0.6247 | 5.1143 | 5.1039 | 0.0239 | 0.7157 | 8   | 19  | 23  | 9   | 5   | 20  | 39  | 11  | 9   | 12  |
| <b>Mad2l2</b>   | 0.6237 | 2.9876 | 4.0264 | 0.0448 | 0.8574 | 40  | 15  | 24  | 15  | 15  | 19  | 55  | 30  | 16  | 45  |
| <b>Wdr45</b>    | 0.6149 | 3.7959 | 5.3955 | 0.0202 | 0.6801 | 26  | 40  | 44  | 48  | 11  | 51  | 89  | 25  | 22  | 53  |
| <b>Kctd7</b>    | 0.6102 | 3.5088 | 6.6527 | 0.0099 | 0.5356 | 33  | 16  | 32  | 18  | 13  | 24  | 52  | 40  | 21  | 23  |
| <b>Ccpg1os</b>  | 0.6102 | 2.9199 | 4.1745 | 0.041  | 0.8353 | 25  | 20  | 49  | 51  | 11  | 46  | 36  | 59  | 26  | 46  |
| <b>Zfyve1</b>   | 0.6075 | 3.6915 | 9.2018 | 0.0024 | 0.3137 | 26  | 52  | 46  | 32  | 24  | 56  | 95  | 43  | 23  | 40  |
| <b>Fam189b</b>  | 0.6045 | 6.7863 | 10.206 | 0.0014 | 0.2422 | 33  | 36  | 41  | 20  | 22  | 33  | 52  | 55  | 15  | 61  |
| <b>Col5a1</b>   | 0.6023 | 4.4851 | 4.1656 | 0.0413 | 0.8377 | 54  | 123 | 244 | 102 | 32  | 88  | 266 | 261 | 47  | 108 |
| <b>Aldh1l1</b>  | 0.6012 | 2.811  | 4.8802 | 0.0272 | 0.7422 | 26  | 64  | 36  | 43  | 23  | 58  | 67  | 77  | 24  | 43  |
| <b>Slc9a7</b>   | 0.5993 | 5.8178 | 8.5227 | 0.0035 | 0.3595 | 10  | 45  | 32  | 30  | 9   | 26  | 31  | 55  | 18  | 42  |
| <b>Znhit2</b>   | 0.5967 | 4.7333 | 13.229 | 0.0003 | 0.1101 | 96  | 106 | 103 | 95  | 40  | 117 | 172 | 86  | 62  | 177 |
| <b>Eid2</b>     | 0.5939 | 5.4073 | 6.6807 | 0.0097 | 0.531  | 9   | 29  | 15  | 34  | 18  | 46  | 30  | 31  | 18  | 21  |
| <b>Telo2</b>    | 0.5938 | 3.0463 | 4.8872 | 0.0271 | 0.7414 | 16  | 28  | 46  | 33  | 23  | 30  | 73  | 52  | 10  | 52  |
| <b>Gm36449</b>  | 0.5879 | 4.2688 | 5.1747 | 0.0229 | 0.7051 | 84  | 67  | 71  | 40  | 57  | 66  | 94  | 69  | 50  | 181 |
| <b>Trappc6b</b> | 0.5861 | 3.7594 | 5.8169 | 0.0159 | 0.6274 | 28  | 59  | 46  | 37  | 24  | 40  | 74  | 50  | 15  | 97  |
| <b>Tmem14a</b>  | 0.5859 | 4.8352 | 7.7047 | 0.0055 | 0.4317 | 58  | 41  | 43  | 30  | 22  | 46  | 87  | 72  | 31  | 38  |
| <b>Anks1</b>    | 0.5852 | 4.7715 | 11.239 | 0.0008 | 0.1801 | 80  | 104 | 124 | 85  | 47  | 127 | 160 | 140 | 66  | 110 |
| <b>Ltbp3</b>    | 0.5845 | 3.2179 | 4.2651 | 0.0389 | 0.8206 | 20  | 40  | 25  | 34  | 31  | 24  | 74  | 53  | 27  | 41  |
| <b>Ftl1</b>     | 0.584  | 6.272  | 7.6854 | 0.0056 | 0.434  | 148 | 157 | 159 | 144 | 138 | 217 | 286 | 164 | 147 | 249 |
| <b>Unk</b>      | 0.5839 | 3.2737 | 3.8817 | 0.0488 | 0.6894 | 34  | 35  | 40  | 40  | 39  | 39  | 73  | 63  | 34  | 66  |
| <b>Arhgap28</b> | 0.5837 | 4.5321 | 5.0181 | 0.0251 | 0.7232 | 15  | 13  | 21  | 14  | 7   | 16  | 19  | 28  | 8   | 26  |
| <b>Dnajc14</b>  | 0.5836 | 2.6796 | 4.8894 | 0.027  | 0.741  | 20  | 37  | 19  | 23  | 20  | 36  | 51  | 42  | 14  | 27  |
| <b>Slc52a2</b>  | 0.5826 | 4.8164 | 5.0469 | 0.0247 | 0.7214 | 13  | 24  | 13  | 26  | 19  | 17  | 48  | 28  | 12  | 33  |
| <b>Kank4</b>    | 0.5795 | 5.8703 | 6.2553 | 0.0124 | 0.5751 | 9   | 26  | 27  | 21  | 5   | 23  | 29  | 43  | 11  | 14  |
| <b>Flad1</b>    | 0.5771 | 3.6933 | 5.3763 | 0.0204 | 0.6838 | 51  | 36  | 40  | 22  | 32  | 41  | 72  | 82  | 21  | 49  |
| <b>Lrwd1</b>    | 0.5758 | 3.6587 | 6.7871 | 0.0092 | 0.5176 | 57  | 78  | 58  | 45  | 30  | 96  | 83  | 66  | 27  | 98  |
| <b>Cdyl2</b>    | 0.5743 | 3.7812 | 4.7695 | 0.029  | 0.7557 | 15  | 23  | 21  | 16  | 7   | 20  | 31  | 37  | 5   | 21  |
| <b>Ugcg</b>     | 0.5652 | 4.5224 | 4.556  | 0.0328 | 0.7852 | 15  | 27  | 25  | 15  | 14  | 12  | 47  | 13  | 23  | 35  |
| <b>Fibp</b>     | 0.5635 | 3.6019 | 4.8197 | 0.0281 | 0.7493 | 56  | 62  | 30  | 55  | 14  | 34  | 100 | 70  | 19  | 85  |
| <b>Bphl</b>     | 0.5604 | 3.7498 | 5.404  | 0.0201 | 0.6787 | 57  | 77  | 101 | 69  | 31  | 61  | 107 | 83  | 43  | 157 |
| <b>Aldh16a1</b> | 0.5593 | 3.4017 | 4.1267 | 0.0422 | 0.8429 | 47  | 77  | 84  | 52  | 22  | 63  | 116 | 52  | 35  | 111 |
| <b>Xk</b>       | 0.5533 | 3.8947 | 7.0045 | 0.0081 | 0.4992 | 23  | 23  | 42  | 37  | 20  | 29  | 65  | 46  | 23  | 37  |
| <b>Mkl1</b>     | 0.5505 | 3.6759 | 6.0044 | 0.0143 | 0.604  | 55  | 51  | 59  | 51  | 19  | 39  | 119 | 54  | 41  | 66  |
| <b>Mboat2</b>   | 0.55   | 5.6042 | 6.0539 | 0.0139 | 0.6019 | 7   | 36  | 30  | 26  | 4   | 26  | 36  | 37  | 15  | 22  |
| <b>Mfsd8</b>    | 0.5492 | 2.6854 | 3.9511 | 0.0468 | 0.8678 | 27  | 36  | 25  | 16  | 8   | 22  | 54  | 38  | 5   | 37  |
| <b>Preli1</b>   | 0.5487 | 4.2123 | 7.2836 | 0.007  | 0.4715 | 70  | 74  | 65  | 50  | 44  | 56  | 128 | 64  | 47  | 125 |
| <b>Ttll7</b>    | 0.547  | 8.8792 | 6.9135 | 0.0086 | 0.5048 | 11  | 12  | 38  | 28  | 16  | 25  | 26  | 45  | 13  | 33  |
| <b>Acox3</b>    | 0.5465 | 4.8201 | 10.886 | 0.001  | 0.1957 | 62  | 99  | 89  | 82  | 46  | 91  | 119 | 160 | 55  | 83  |
| <b>Zfp937</b>   | 0.5453 | 3.5567 | 7.2045 | 0.0073 | 0.4784 | 30  | 61  | 85  | 44  | 19  | 57  | 101 | 64  | 39  | 51  |
| <b>Smarca1</b>  | 0.5417 | 4.5037 | 4.3272 | 0.0375 | 0.8131 | 22  | 18  | 17  | 21  | 15  | 41  | 31  | 12  | 22  | 18  |
| <b>Memo1</b>    | 0.5408 | 3.6704 | 4.6916 | 0.0303 | 0.7699 | 42  | 63  | 82  | 53  | 28  | 70  | 90  | 52  | 30  | 117 |
| <b>Ubf1</b>     | 0.5395 | 4.2711 | 6.809  | 0.0091 | 0.5171 | 46  | 64  | 62  | 48  | 39  | 69  | 63  | 66  | 46  | 98  |
| <b>Lcmt1</b>    | 0.5378 | 4.964  | 9.5996 | 0.0019 | 0.2767 | 92  | 121 | 86  | 63  | 41  | 88  | 131 | 89  | 68  | 151 |
| <b>Cyb561d2</b> | 0.5375 | 4.1446 | 4.9763 | 0.0257 | 0.7331 | 35  | 41  | 41  | 32  | 44  | 53  | 76  | 46  | 33  | 63  |
| <b>Bet1</b>     | 0.5371 | 3.308  | 4.5114 | 0.0337 | 0.794  | 34  | 27  | 56  | 35  | 22  | 25  | 57  | 60  | 24  | 71  |

|                 |        |        |        |        |        |     |     |     |     |     |     |     |     |     |     |
|-----------------|--------|--------|--------|--------|--------|-----|-----|-----|-----|-----|-----|-----|-----|-----|-----|
| <b>Heatr3</b>   | 0.5364 | 3.9849 | 5.1815 | 0.0228 | 0.7051 | 43  | 94  | 94  | 61  | 29  | 73  | 140 | 62  | 63  | 70  |
| <b>Vps16</b>    | 0.5354 | 5.0715 | 13.464 | 0.0002 | 0.1029 | 89  | 173 | 133 | 97  | 83  | 135 | 215 | 181 | 86  | 154 |
| <b>Sbk1</b>     | 0.5347 | 4.6056 | 4.2607 | 0.039  | 0.8215 | 17  | 31  | 34  | 37  | 6   | 20  | 64  | 32  | 11  | 43  |
| <b>Ift43</b>    | 0.5336 | 3.909  | 7.5118 | 0.0061 | 0.4459 | 53  | 71  | 65  | 81  | 25  | 85  | 121 | 83  | 30  | 82  |
| <b>Tdrp</b>     | 0.5322 | 3.7936 | 6.144  | 0.0132 | 0.5897 | 43  | 69  | 71  | 57  | 20  | 77  | 94  | 83  | 16  | 81  |
| <b>Ahcyl2</b>   | 0.532  | 5.1188 | 5.6507 | 0.0174 | 0.6381 | 35  | 40  | 48  | 29  | 47  | 56  | 49  | 48  | 42  | 73  |
| <b>Snhg18</b>   | 0.5272 | 4.6044 | 7.3496 | 0.0067 | 0.4632 | 58  | 68  | 90  | 63  | 22  | 77  | 146 | 84  | 29  | 71  |
| <b>Srprb</b>    | 0.5269 | 4.3568 | 6.4317 | 0.0112 | 0.5523 | 62  | 75  | 88  | 55  | 31  | 67  | 128 | 76  | 44  | 98  |
| <b>Bnip3</b>    | 0.5223 | 5.8122 | 5.4152 | 0.02   | 0.6772 | 33  | 40  | 21  | 21  | 15  | 61  | 32  | 22  | 23  | 30  |
| <b>Car9</b>     | 0.521  | 2.7114 | 3.9192 | 0.0477 | 0.8678 | 30  | 88  | 50  | 52  | 22  | 77  | 106 | 58  | 29  | 46  |
| <b>Rbm43</b>    | 0.5204 | 3.4444 | 4.1571 | 0.0415 | 0.8377 | 23  | 60  | 41  | 45  | 23  | 45  | 62  | 48  | 36  | 55  |
| <b>Kcnk1</b>    | 0.5167 | 6.1925 | 4.2435 | 0.0394 | 0.823  | 30  | 18  | 46  | 38  | 25  | 34  | 30  | 71  | 32  | 39  |
| <b>Fermt2</b>   | 0.5132 | 6.3222 | 4.8766 | 0.0272 | 0.7431 | 20  | 31  | 45  | 17  | 16  | 25  | 73  | 33  | 8   | 37  |
| <b>Gm6988</b>   | 0.5106 | 3.0228 | 5.0273 | 0.025  | 0.7219 | 45  | 71  | 58  | 38  | 30  | 59  | 77  | 53  | 49  | 68  |
| <b>Zfp592</b>   | 0.5103 | 4.3184 | 7.5343 | 0.0061 | 0.4459 | 54  | 90  | 116 | 94  | 40  | 93  | 159 | 107 | 43  | 122 |
| <b>Uqcrfs1</b>  | 0.51   | 6.1937 | 9.8352 | 0.0017 | 0.261  | 204 | 233 | 201 | 245 | 143 | 231 | 342 | 205 | 187 | 388 |
| <b>Lyrn1</b>    | 0.5095 | 3.7989 | 4.0408 | 0.0444 | 0.8563 | 33  | 23  | 45  | 21  | 25  | 39  | 86  | 43  | 9   | 33  |
| <b>Hip1</b>     | 0.5073 | 5.2739 | 5.4643 | 0.0194 | 0.6697 | 22  | 23  | 31  | 25  | 18  | 38  | 60  | 23  | 6   | 35  |
| <b>Nudcd1</b>   | 0.507  | 3.4022 | 4.6886 | 0.0304 | 0.7699 | 51  | 58  | 49  | 28  | 31  | 36  | 93  | 72  | 23  | 73  |
| <b>Glcc1</b>    | 0.5051 | 4.3741 | 5.1381 | 0.0234 | 0.7084 | 27  | 38  | 37  | 14  | 17  | 43  | 42  | 33  | 7   | 51  |
| <b>Cisd3</b>    | 0.5047 | 5.1466 | 4.039  | 0.0445 | 0.8567 | 49  | 65  | 48  | 35  | 25  | 68  | 125 | 47  | 17  | 49  |
| <b>Mzt1</b>     | 0.5043 | 3.5523 | 4.679  | 0.0305 | 0.7712 | 41  | 32  | 31  | 34  | 26  | 44  | 49  | 44  | 26  | 56  |
| <b>Zfyve19</b>  | 0.5011 | 4.0821 | 6.5366 | 0.0106 | 0.5456 | 45  | 40  | 71  | 55  | 20  | 57  | 92  | 62  | 31  | 61  |
| <b>Vhl</b>      | 0.4967 | 4.177  | 4.6443 | 0.0312 | 0.7726 | 78  | 105 | 114 | 76  | 42  | 122 | 129 | 92  | 43  | 153 |
| <b>Gabbr1</b>   | 0.4961 | 7.3531 | 4.6645 | 0.0308 | 0.772  | 44  | 62  | 47  | 20  | 19  | 27  | 128 | 61  | 11  | 38  |
| <b>Tmem170k</b> | 0.4956 | 3.2092 | 3.883  | 0.0488 | 0.8694 | 26  | 45  | 52  | 44  | 9   | 36  | 66  | 55  | 26  | 39  |
| <b>Spata13</b>  | 0.4927 | 5.4925 | 11.099 | 0.0009 | 0.1872 | 106 | 244 | 195 | 180 | 68  | 181 | 306 | 220 | 73  | 252 |
| <b>Dmap1</b>    | 0.491  | 4.1232 | 6.6789 | 0.0098 | 0.531  | 56  | 91  | 94  | 41  | 39  | 99  | 113 | 83  | 35  | 85  |
| <b>Abcb10</b>   | 0.4896 | 4.3645 | 6.3964 | 0.0114 | 0.5574 | 79  | 79  | 90  | 77  | 43  | 85  | 139 | 110 | 53  | 96  |
| <b>Psmg2</b>    | 0.4864 | 4.4333 | 6.5259 | 0.0106 | 0.546  | 67  | 63  | 82  | 75  | 52  | 88  | 125 | 70  | 54  | 111 |
| <b>Gamt</b>     | 0.4851 | 4.7937 | 6.4516 | 0.0111 | 0.5501 | 28  | 46  | 57  | 35  | 24  | 49  | 71  | 36  | 23  | 67  |
| <b>Kctd3</b>    | 0.4847 | 4.3904 | 4.5869 | 0.0322 | 0.7798 | 63  | 104 | 65  | 48  | 28  | 91  | 86  | 78  | 32  | 103 |
| <b>Ptpmt1</b>   | 0.4842 | 5.0693 | 9.1938 | 0.0024 | 0.3137 | 94  | 161 | 120 | 132 | 60  | 125 | 222 | 121 | 87  | 172 |
| <b>Ddx28</b>    | 0.4815 | 3.8113 | 4.14   | 0.0419 | 0.8413 | 34  | 87  | 76  | 29  | 22  | 51  | 110 | 42  | 46  | 53  |
| <b>Ldha</b>     | 0.4806 | 5.3394 | 6.4748 | 0.0109 | 0.5486 | 184 | 296 | 196 | 128 | 100 | 195 | 253 | 185 | 149 | 331 |
| <b>Wdr35</b>    | 0.479  | 4.191  | 5.8092 | 0.0159 | 0.628  | 31  | 78  | 62  | 49  | 34  | 61  | 58  | 103 | 34  | 65  |
| <b>Mras</b>     | 0.4777 | 6.8429 | 5.7123 | 0.0168 | 0.6337 | 40  | 100 | 137 | 37  | 32  | 116 | 112 | 114 | 25  | 67  |
| <b>Ulk1</b>     | 0.4764 | 5.3362 | 9.219  | 0.0024 | 0.3133 | 122 | 234 | 197 | 159 | 78  | 256 | 235 | 226 | 80  | 204 |
| <b>Pdcl</b>     | 0.476  | 4.4701 | 6.5779 | 0.0103 | 0.5435 | 83  | 108 | 81  | 82  | 35  | 90  | 148 | 106 | 53  | 101 |
| <b>Slc39a11</b> | 0.4759 | 4.1156 | 4.511  | 0.0337 | 0.794  | 63  | 115 | 88  | 75  | 34  | 99  | 118 | 77  | 70  | 89  |
| <b>Pus10</b>    | 0.4734 | 3.1709 | 3.9387 | 0.0472 | 0.8678 | 51  | 46  | 64  | 51  | 30  | 56  | 58  | 88  | 33  | 76  |
| <b>Slx4ip</b>   | 0.473  | 3.8557 | 7.204  | 0.0073 | 0.4784 | 61  | 94  | 128 | 74  | 37  | 80  | 175 | 101 | 44  | 108 |
| <b>Nes</b>      | 0.4702 | 5.0478 | 6.1966 | 0.0128 | 0.5841 | 42  | 55  | 45  | 38  | 33  | 54  | 98  | 77  | 18  | 37  |
| <b>Serpinh1</b> | 0.4608 | 5.1089 | 5.047  | 0.0247 | 0.7214 | 80  | 102 | 124 | 88  | 42  | 78  | 219 | 109 | 40  | 130 |
| <b>Polr3c</b>   | 0.46   | 3.8363 | 5.0168 | 0.0251 | 0.7232 | 54  | 52  | 75  | 68  | 39  | 75  | 92  | 83  | 49  | 67  |
| <b>Srp9</b>     | 0.4576 | 4.8754 | 7.0017 | 0.0081 | 0.4992 | 67  | 100 | 118 | 51  | 28  | 76  | 167 | 80  | 48  | 84  |
| <b>Bud13</b>    | 0.4498 | 3.7093 | 5.8802 | 0.0153 | 0.6176 | 71  | 86  | 87  | 52  | 47  | 107 | 113 | 87  | 50  | 74  |
| <b>Gabpb1</b>   | 0.4493 | 3.337  | 4.0222 | 0.0449 | 0.8577 | 54  | 64  | 62  | 40  | 17  | 57  | 83  | 45  | 34  | 72  |
| <b>Zbtb17</b>   | 0.4487 | 4.4907 | 7.0459 | 0.0079 | 0.4954 | 119 | 180 | 144 | 99  | 54  | 158 | 236 | 153 | 84  | 105 |
| <b>Slc7a8</b>   | 0.4428 | 4.4525 | 4.3835 | 0.0363 | 0.811  | 97  | 169 | 141 | 167 | 77  | 118 | 192 | 182 | 116 | 187 |
| <b>Ptcd2</b>    | 0.4422 | 4.8077 | 8.0463 | 0.0046 | 0.3978 | 88  | 108 | 95  | 102 | 28  | 102 | 139 | 103 | 56  | 120 |
| <b>Kat2a</b>    | 0.442  | 4.4751 | 6.3803 | 0.0115 | 0.5577 | 68  | 152 | 131 | 85  | 60  | 124 | 168 | 107 | 64  | 150 |
| <b>Tmc4</b>     | 0.4402 | 3.0478 | 4.6173 | 0.0317 | 0.7767 | 66  | 76  | 64  | 49  | 38  | 62  | 90  | 76  | 47  | 90  |
| <b>Fam73b</b>   | 0.4392 | 4.5216 | 4.3401 | 0.0372 | 0.8131 | 32  | 64  | 45  | 61  | 27  | 43  | 86  | 31  | 48  | 72  |
| <b>Thbd</b>     | 0.4392 | 4.1384 | 6.5899 | 0.0103 | 0.5434 | 61  | 123 | 126 | 97  | 69  | 99  | 110 | 147 | 66  | 168 |
| <b>Idnk</b>     | 0.4386 | 4.7812 | 6.726  | 0.0095 | 0.525  | 75  | 90  | 109 | 44  | 46  | 82  | 137 | 81  | 60  | 90  |
| <b>Maged1</b>   | 0.4368 | 7.11   | 9.9838 | 0.0016 | 0.2559 | 94  | 177 | 171 | 169 | 76  | 162 | 273 | 154 | 68  | 218 |
| <b>Ankrd34c</b> | 0.4348 | 4.1549 | 4.3706 | 0.0366 | 0.8119 | 75  | 109 | 103 | 54  | 64  | 98  | 147 | 77  | 64  | 121 |
| <b>Pkia</b>     | 0.4343 | 5.4833 | 5.039  | 0.0248 | 0.7219 | 40  | 30  | 35  | 29  | 6   | 37  | 56  | 24  | 20  | 37  |
| <b>Slc25a46</b> | 0.4329 | 6.2372 | 10.36  | 0.0013 | 0.2316 | 134 | 178 | 162 | 80  | 98  | 180 | 209 | 141 | 115 | 154 |
| <b>Tigar</b>    | 0.4327 | 5.2577 | 5.3564 | 0.0206 | 0.689  | 27  | 75  | 63  | 60  | 38  | 33  | 124 | 83  | 28  | 71  |
| <b>Map6</b>     | 0.4324 | 7.0168 | 7.8248 | 0.0052 | 0.4185 | 98  | 155 | 145 | 94  | 72  | 100 | 265 | 181 | 80  | 88  |

|                 |        |        |        |        |        |      |      |      |      |      |      |      |      |      |      |
|-----------------|--------|--------|--------|--------|--------|------|------|------|------|------|------|------|------|------|------|
| <b>Zfp532</b>   | 0.4318 | 4.8884 | 6.2565 | 0.0124 | 0.5751 | 111  | 159  | 173  | 120  | 50   | 109  | 195  | 206  | 86   | 146  |
| <b>Akr7a5</b>   | 0.4301 | 4.7871 | 4.7372 | 0.0295 | 0.7616 | 82   | 87   | 79   | 112  | 29   | 85   | 112  | 96   | 45   | 146  |
| <b>Rgl2</b>     | 0.4293 | 4.1282 | 3.9957 | 0.0456 | 0.8597 | 69   | 135  | 138  | 93   | 53   | 91   | 239  | 117  | 55   | 117  |
| <b>Acsl4</b>    | 0.4284 | 5.4485 | 6.6453 | 0.0099 | 0.5362 | 116  | 172  | 189  | 132  | 60   | 112  | 158  | 150  | 105  | 267  |
| <b>Kifc3</b>    | 0.4272 | 4.5226 | 5.6932 | 0.017  | 0.6337 | 141  | 170  | 195  | 118  | 93   | 160  | 253  | 179  | 87   | 226  |
| <b>Fam89a</b>   | 0.4264 | 5.1941 | 3.8889 | 0.0486 | 0.8678 | 33   | 99   | 101  | 85   | 27   | 75   | 144  | 76   | 42   | 83   |
| <b>Sipa112</b>  | 0.4259 | 4.54   | 6.5568 | 0.0104 | 0.5454 | 58   | 91   | 126  | 75   | 63   | 85   | 113  | 127  | 54   | 135  |
| <b>Rap1gap</b>  | 0.4254 | 5.5718 | 9.0402 | 0.0026 | 0.3188 | 107  | 187  | 164  | 144  | 80   | 173  | 318  | 151  | 81   | 139  |
| <b>Manf</b>     | 0.4253 | 6.0875 | 7.3715 | 0.0066 | 0.4611 | 245  | 345  | 462  | 283  | 165  | 282  | 492  | 313  | 192  | 566  |
| <b>Tpm2</b>     | 0.4215 | 6.6972 | 5.4141 | 0.02   | 0.6772 | 575  | 1137 | 940  | 740  | 374  | 834  | 848  | 714  | 793  | 953  |
| <b>Sac3d1</b>   | 0.4198 | 4.8122 | 6.8318 | 0.009  | 0.5138 | 108  | 134  | 167  | 93   | 61   | 134  | 165  | 179  | 60   | 156  |
| <b>Ptch1</b>    | 0.4126 | 4.7563 | 4.2684 | 0.0388 | 0.8197 | 54   | 77   | 67   | 54   | 34   | 41   | 77   | 108  | 55   | 60   |
| <b>Slc36a4</b>  | 0.4125 | 4.4063 | 4.6381 | 0.0313 | 0.7726 | 40   | 63   | 55   | 35   | 17   | 63   | 78   | 40   | 34   | 36   |
| <b>Lym5</b>     | 0.411  | 4.3583 | 5.2873 | 0.0215 | 0.6958 | 55   | 78   | 89   | 78   | 40   | 80   | 135  | 75   | 53   | 74   |
| <b>Porcn</b>    | 0.4085 | 4.5068 | 5.9729 | 0.0145 | 0.6057 | 73   | 163  | 118  | 70   | 38   | 91   | 188  | 107  | 46   | 128  |
| <b>Ptpm</b>     | 0.4067 | 4.4183 | 4.7177 | 0.0299 | 0.7677 | 58   | 64   | 83   | 75   | 43   | 63   | 136  | 75   | 55   | 71   |
| <b>Ubc2</b>     | 0.4041 | 4.7112 | 5.5659 | 0.0183 | 0.6536 | 101  | 142  | 92   | 102  | 80   | 130  | 185  | 157  | 42   | 153  |
| <b>Tctex1d2</b> | 0.4036 | 3.8382 | 5.5126 | 0.0189 | 0.662  | 72   | 90   | 88   | 75   | 44   | 94   | 125  | 88   | 45   | 102  |
| <b>Acox1</b>    | 0.4034 | 5.5212 | 4.8169 | 0.0282 | 0.7493 | 131  | 124  | 199  | 130  | 92   | 178  | 188  | 131  | 90   | 243  |
| <b>Pgs1</b>     | 0.403  | 5.6137 | 5.6991 | 0.017  | 0.6337 | 95   | 98   | 142  | 83   | 64   | 132  | 204  | 100  | 66   | 96   |
| <b>Rpl28</b>    | 0.3989 | 7.5202 | 8.6582 | 0.0033 | 0.3445 | 1054 | 1893 | 1361 | 1250 | 785  | 1731 | 2095 | 1336 | 673  | 1996 |
| <b>Rpap3</b>    | 0.3984 | 4.9131 | 6.1384 | 0.0132 | 0.5897 | 83   | 141  | 156  | 72   | 63   | 106  | 198  | 119  | 75   | 121  |
| <b>Cd24a</b>    | 0.3982 | 7.7129 | 5.1059 | 0.0238 | 0.7155 | 665  | 848  | 590  | 529  | 382  | 459  | 766  | 560  | 533  | 1231 |
| <b>Mapk8ip1</b> | 0.3975 | 7.1831 | 4.0062 | 0.0453 | 0.8577 | 22   | 30   | 35   | 33   | 9    | 30   | 24   | 45   | 27   | 27   |
| <b>Sec24c</b>   | 0.3971 | 5.8051 | 5.2516 | 0.0219 | 0.6995 | 291  | 372  | 441  | 319  | 143  | 268  | 483  | 389  | 179  | 571  |
| <b>Ifi27</b>    | 0.3959 | 7.1729 | 10.588 | 0.0011 | 0.2213 | 325  | 626  | 551  | 493  | 218  | 539  | 757  | 455  | 259  | 647  |
| <b>Coasy</b>    | 0.3959 | 5.5405 | 6.8369 | 0.0089 | 0.5138 | 147  | 200  | 176  | 142  | 88   | 227  | 277  | 135  | 116  | 147  |
| <b>Apex1</b>    | 0.3952 | 4.7174 | 5.9695 | 0.0146 | 0.6057 | 107  | 122  | 154  | 111  | 59   | 122  | 158  | 157  | 67   | 165  |
| <b>Snrpe</b>    | 0.3933 | 5.1293 | 4.582  | 0.0323 | 0.7806 | 192  | 209  | 201  | 148  | 101  | 173  | 287  | 179  | 91   | 328  |
| <b>Dtd1</b>     | 0.3932 | 4.9752 | 6.1144 | 0.0134 | 0.5948 | 64   | 104  | 77   | 96   | 43   | 89   | 154  | 75   | 44   | 111  |
| <b>Sema4d</b>   | 0.3931 | 5.7954 | 7.0309 | 0.008  | 0.4986 | 334  | 478  | 404  | 334  | 187  | 348  | 515  | 357  | 257  | 576  |
| <b>Cldn23</b>   | 0.3927 | 5.5181 | 7.6662 | 0.0056 | 0.434  | 326  | 435  | 442  | 335  | 206  | 342  | 504  | 415  | 233  | 606  |
| <b>Ehd3</b>     | 0.3889 | 8.062  | 9.1412 | 0.0025 | 0.3165 | 99   | 201  | 172  | 143  | 78   | 139  | 193  | 176  | 110  | 195  |
| <b>Rnf126</b>   | 0.3873 | 5.2434 | 7.2773 | 0.007  | 0.4716 | 202  | 265  | 216  | 179  | 146  | 252  | 352  | 213  | 111  | 329  |
| <b>Tceb1</b>    | 0.3866 | 6.5136 | 7.2308 | 0.0072 | 0.4766 | 274  | 320  | 262  | 250  | 121  | 248  | 351  | 251  | 182  | 417  |
| <b>Rnf115</b>   | 0.3839 | 5.1248 | 5.7037 | 0.0169 | 0.6337 | 95   | 120  | 145  | 86   | 85   | 129  | 133  | 148  | 50   | 196  |
| <b>Tmem43</b>   | 0.3801 | 5.1978 | 4.9072 | 0.0267 | 0.7377 | 186  | 344  | 288  | 216  | 108  | 269  | 356  | 213  | 133  | 368  |
| <b>Sh3gl1</b>   | 0.3798 | 4.5588 | 4.665  | 0.0308 | 0.772  | 120  | 185  | 132  | 139  | 63   | 118  | 249  | 164  | 99   | 128  |
| <b>Capn7</b>    | 0.3795 | 5.6704 | 7.6723 | 0.0056 | 0.434  | 234  | 238  | 338  | 186  | 142  | 249  | 334  | 253  | 175  | 335  |
| <b>Nampt</b>    | 0.3757 | 5.1803 | 8.8338 | 0.003  | 0.3324 | 150  | 201  | 194  | 196  | 73   | 199  | 293  | 190  | 95   | 199  |
| <b>Dpy19l4</b>  | 0.3746 | 4.7309 | 6.0526 | 0.0139 | 0.6019 | 77   | 94   | 113  | 78   | 62   | 91   | 152  | 85   | 52   | 137  |
| <b>Srxn1</b>    | 0.3746 | 7.1378 | 7.332  | 0.0068 | 0.4647 | 151  | 148  | 158  | 137  | 67   | 180  | 211  | 184  | 91   | 121  |
| <b>Tsg101</b>   | 0.3742 | 6.0599 | 7.01   | 0.0081 | 0.4992 | 258  | 386  | 361  | 304  | 182  | 293  | 516  | 313  | 171  | 521  |
| <b>Ltb4r2</b>   | 0.3739 | 3.4363 | 5.8355 | 0.0157 | 0.6238 | 69   | 141  | 114  | 72   | 40   | 97   | 141  | 107  | 58   | 104  |
| <b>Clpp</b>     | 0.3737 | 5.0617 | 7.6816 | 0.0056 | 0.434  | 120  | 156  | 169  | 154  | 89   | 152  | 243  | 170  | 61   | 225  |
| <b>Pi4ka</b>    | 0.3734 | 5.7475 | 7.5045 | 0.0062 | 0.4459 | 85   | 148  | 146  | 100  | 67   | 94   | 232  | 138  | 67   | 130  |
| <b>Csrp1</b>    | 0.3727 | 5.9448 | 6.2547 | 0.0124 | 0.5751 | 157  | 155  | 139  | 132  | 76   | 118  | 215  | 150  | 96   | 213  |
| <b>Limk1</b>    | 0.3726 | 6.6669 | 4.4149 | 0.0356 | 0.811  | 28   | 56   | 52   | 24   | 27   | 43   | 68   | 40   | 28   | 43   |
| <b>Rps27l</b>   | 0.3723 | 6.2016 | 3.8774 | 0.0489 | 0.8696 | 422  | 546  | 481  | 400  | 263  | 384  | 446  | 334  | 315  | 980  |
| <b>Iars</b>     | 0.3718 | 5.2603 | 4.318  | 0.0377 | 0.8131 | 104  | 122  | 159  | 90   | 73   | 88   | 175  | 127  | 75   | 193  |
| <b>Ambra1</b>   | 0.3717 | 4.4544 | 4.296  | 0.0382 | 0.8147 | 94   | 127  | 125  | 92   | 35   | 97   | 97   | 163  | 62   | 122  |
| <b>Rpl37a</b>   | 0.3715 | 8.2798 | 5.635  | 0.0176 | 0.6392 | 2060 | 2385 | 2320 | 1606 | 1302 | 2130 | 2982 | 1679 | 1186 | 3798 |
| <b>Rpp25l</b>   | 0.3713 | 4.205  | 4.5393 | 0.0331 | 0.7861 | 74   | 103  | 103  | 84   | 29   | 103  | 125  | 100  | 45   | 88   |
| <b>Slc39a1</b>  | 0.3712 | 5.113  | 4.9413 | 0.0262 | 0.7359 | 193  | 252  | 223  | 192  | 139  | 205  | 375  | 186  | 164  | 267  |
| <b>Acaca</b>    | 0.3711 | 5.2726 | 5.4871 | 0.0192 | 0.6691 | 136  | 185  | 193  | 114  | 90   | 146  | 212  | 160  | 95   | 238  |
| <b>Brox</b>     | 0.3695 | 5.1606 | 6.8687 | 0.0088 | 0.5106 | 104  | 200  | 158  | 126  | 84   | 126  | 222  | 157  | 75   | 226  |
| <b>Nenf</b>     | 0.3628 | 5.4045 | 4.2189 | 0.04   | 0.8266 | 89   | 119  | 116  | 71   | 56   | 96   | 170  | 78   | 59   | 135  |
| <b>Klhdc3</b>   | 0.3627 | 5.1799 | 4.8186 | 0.0282 | 0.7493 | 92   | 167  | 118  | 134  | 36   | 150  | 111  | 123  | 75   | 154  |
| <b>Sash1</b>    | 0.3616 | 5.4655 | 7.0468 | 0.0079 | 0.4954 | 85   | 96   | 107  | 83   | 35   | 109  | 117  | 106  | 39   | 109  |
| <b>Timm10b</b>  | 0.3613 | 5.4954 | 7.8752 | 0.005  | 0.4129 | 131  | 193  | 198  | 142  | 106  | 204  | 205  | 167  | 106  | 222  |
| <b>Tpi1</b>     | 0.3611 | 6.949  | 6.992  | 0.0082 | 0.4992 | 310  | 411  | 308  | 259  | 160  | 340  | 360  | 319  | 163  | 523  |
| <b>Ap3s2</b>    | 0.3595 | 6.1253 | 5.8944 | 0.0152 | 0.6154 | 99   | 179  | 144  | 151  | 76   | 143  | 234  | 150  | 68   | 186  |

|                  |        |        |        |        |        |      |      |      |      |      |      |      |      |      |      |
|------------------|--------|--------|--------|--------|--------|------|------|------|------|------|------|------|------|------|------|
| <b>Fadd</b>      | 0.3576 | 4.1255 | 4.4721 | 0.0345 | 0.8007 | 114  | 171  | 139  | 111  | 60   | 157  | 175  | 131  | 79   | 145  |
| <b>Sharpin</b>   | 0.3572 | 5.1808 | 5.7884 | 0.0161 | 0.6285 | 103  | 154  | 195  | 113  | 77   | 156  | 218  | 157  | 94   | 122  |
| <b>Rpl19</b>     | 0.3545 | 6.2071 | 4.6293 | 0.0314 | 0.7737 | 347  | 449  | 441  | 295  | 282  | 306  | 478  | 414  | 329  | 572  |
| <b>Uqcr11</b>    | 0.3541 | 6.7347 | 7.94   | 0.0048 | 0.4028 | 290  | 404  | 412  | 275  | 167  | 332  | 515  | 271  | 183  | 518  |
| <b>Ndrp2</b>     | 0.354  | 7.011  | 4.5044 | 0.0338 | 0.7954 | 72   | 98   | 86   | 56   | 38   | 72   | 114  | 81   | 60   | 76   |
| <b>Tmem164</b>   | 0.3538 | 4.8402 | 5.5827 | 0.0181 | 0.6489 | 154  | 201  | 193  | 146  | 81   | 152  | 212  | 179  | 107  | 246  |
| <b>2010107E0</b> | 0.3503 | 7.8817 | 4.1739 | 0.0411 | 0.8353 | 376  | 504  | 541  | 354  | 369  | 422  | 591  | 381  | 296  | 896  |
| <b>Plk2</b>      | 0.3487 | 5.1486 | 4.3225 | 0.0376 | 0.8131 | 170  | 349  | 316  | 241  | 138  | 250  | 300  | 304  | 138  | 409  |
| <b>Abcg2</b>     | 0.3473 | 5.3835 | 3.9001 | 0.0483 | 0.8678 | 139  | 241  | 145  | 144  | 87   | 197  | 133  | 132  | 113  | 269  |
| <b>Tex264</b>    | 0.3461 | 5.5227 | 6.081  | 0.0137 | 0.6008 | 140  | 184  | 228  | 172  | 60   | 171  | 214  | 202  | 88   | 225  |
| <b>Zfp612</b>    | 0.3435 | 4.9413 | 5.3015 | 0.0213 | 0.6958 | 60   | 132  | 113  | 86   | 43   | 92   | 178  | 114  | 44   | 82   |
| <b>Dbi</b>       | 0.3431 | 9.4489 | 7.2983 | 0.0069 | 0.4703 | 1635 | 2134 | 2051 | 2015 | 1280 | 2074 | 2065 | 2057 | 1346 | 3047 |
| <b>Isca2</b>     | 0.3421 | 5.0172 | 4.9051 | 0.0268 | 0.7377 | 70   | 98   | 103  | 93   | 54   | 82   | 152  | 80   | 46   | 139  |
| <b>Fth1</b>      | 0.3414 | 10.455 | 3.9518 | 0.0468 | 0.8678 | 4198 | 5833 | 5877 | 4026 | 2525 | 3418 | 6365 | 5211 | 2188 | 9489 |
| <b>Psme2</b>     | 0.3409 | 5.1997 | 5.1402 | 0.0234 | 0.7084 | 222  | 254  | 274  | 208  | 174  | 299  | 366  | 230  | 145  | 317  |
| <b>Rpl7a</b>     | 0.3403 | 7.2286 | 5.9159 | 0.015  | 0.612  | 974  | 1436 | 1304 | 867  | 490  | 953  | 1394 | 1031 | 560  | 1878 |
| <b>Dcaf12</b>    | 0.3402 | 6.2115 | 11.82  | 0.0006 | 0.1573 | 406  | 497  | 491  | 345  | 175  | 453  | 621  | 483  | 211  | 455  |
| <b>Fbrsl1</b>    | 0.3356 | 5.3533 | 4.4311 | 0.0353 | 0.8076 | 221  | 380  | 342  | 272  | 154  | 196  | 491  | 368  | 151  | 411  |
| <b>Ccdc124</b>   | 0.3353 | 5.7603 | 5.8239 | 0.0158 | 0.6257 | 130  | 181  | 234  | 128  | 90   | 190  | 263  | 166  | 77   | 199  |
| <b>Xbp1</b>      | 0.3351 | 5.8269 | 5.085  | 0.0241 | 0.7184 | 287  | 349  | 422  | 251  | 173  | 240  | 467  | 333  | 190  | 493  |
| <b>Rnaseh2c</b>  | 0.3349 | 4.8265 | 3.9057 | 0.0481 | 0.8678 | 100  | 120  | 112  | 86   | 80   | 107  | 147  | 106  | 77   | 147  |
| <b>Igf2r</b>     | 0.3321 | 5.0862 | 6.4706 | 0.011  | 0.5486 | 140  | 225  | 194  | 163  | 91   | 135  | 240  | 224  | 107  | 230  |
| <b>Znrf2</b>     | 0.3318 | 4.7416 | 4.3067 | 0.038  | 0.8131 | 148  | 240  | 271  | 209  | 126  | 189  | 263  | 224  | 128  | 342  |
| <b>Abr</b>       | 0.3315 | 5.367  | 4.1805 | 0.0409 | 0.8344 | 66   | 112  | 92   | 68   | 42   | 114  | 106  | 79   | 32   | 109  |
| <b>Trappc13</b>  | 0.3313 | 4.9722 | 4.1619 | 0.0413 | 0.8377 | 122  | 187  | 139  | 101  | 60   | 112  | 204  | 121  | 69   | 197  |
| <b>Uqcc2</b>     | 0.3305 | 6.5221 | 4.8645 | 0.0274 | 0.7467 | 231  | 389  | 330  | 181  | 178  | 236  | 305  | 285  | 177  | 484  |
| <b>Mrps9</b>     | 0.3303 | 5.0944 | 4.4959 | 0.034  | 0.7963 | 130  | 128  | 102  | 90   | 72   | 121  | 182  | 119  | 48   | 161  |
| <b>Wdr3</b>      | 0.3303 | 4.5997 | 4.3077 | 0.0379 | 0.8131 | 98   | 158  | 167  | 90   | 46   | 109  | 234  | 124  | 52   | 131  |
| <b>Lage3</b>     | 0.3295 | 4.908  | 5.6378 | 0.0176 | 0.6392 | 181  | 235  | 214  | 195  | 88   | 221  | 287  | 249  | 98   | 205  |
| <b>Cstb</b>      | 0.3295 | 7.5103 | 4.5803 | 0.0323 | 0.7809 | 1281 | 1564 | 1544 | 1178 | 788  | 1406 | 1650 | 1216 | 801  | 2273 |
| <b>Ncbp2</b>     | 0.3278 | 5.8572 | 5.4355 | 0.0197 | 0.6748 | 207  | 290  | 262  | 224  | 169  | 228  | 307  | 260  | 200  | 315  |
| <b>Flot2</b>     | 0.3273 | 6.7012 | 5.0658 | 0.0244 | 0.7207 | 75   | 132  | 105  | 84   | 38   | 120  | 142  | 114  | 47   | 73   |
| <b>Adrm1</b>     | 0.3233 | 4.9739 | 5.4702 | 0.0193 | 0.6697 | 107  | 144  | 143  | 103  | 83   | 149  | 187  | 107  | 86   | 139  |
| <b>Cox10</b>     | 0.3226 | 5.438  | 6.2508 | 0.0124 | 0.5751 | 129  | 158  | 175  | 113  | 70   | 126  | 198  | 144  | 109  | 149  |
| <b>Agtpbbp1</b>  | 0.3223 | 7.5747 | 5.0572 | 0.0245 | 0.7214 | 57   | 123  | 89   | 66   | 46   | 78   | 158  | 86   | 46   | 73   |
| <b>Slc4a11</b>   | 0.3214 | 7.4873 | 4.9259 | 0.0265 | 0.7377 | 799  | 2145 | 1930 | 1632 | 831  | 1642 | 2514 | 1756 | 798  | 1724 |
| <b>Fbxo31</b>    | 0.3211 | 6.53   | 6.0288 | 0.0141 | 0.604  | 64   | 118  | 97   | 80   | 44   | 83   | 133  | 107  | 34   | 110  |
| <b>Ndufc2</b>    | 0.3208 | 7.0244 | 4.6084 | 0.0318 | 0.7776 | 279  | 385  | 299  | 248  | 226  | 284  | 379  | 286  | 210  | 507  |
| <b>Zfp668</b>    | 0.3207 | 4.4781 | 4.0769 | 0.0435 | 0.85   | 76   | 108  | 143  | 101  | 49   | 136  | 179  | 79   | 51   | 106  |
| <b>Ubc</b>       | 0.3195 | 9.4279 | 3.9096 | 0.048  | 0.8678 | 2477 | 5144 | 5805 | 4592 | 1839 | 4007 | 5566 | 5256 | 1943 | 5752 |
| <b>Tmem41a</b>   | 0.3187 | 5.4557 | 6.663  | 0.0098 | 0.5336 | 215  | 295  | 243  | 196  | 160  | 257  | 329  | 220  | 173  | 288  |
| <b>1810058I2</b> | 0.3184 | 5.7963 | 5.1782 | 0.0229 | 0.7051 | 81   | 106  | 144  | 87   | 70   | 104  | 156  | 121  | 52   | 137  |
| <b>Tox4</b>      | 0.3182 | 5.0803 | 4.2385 | 0.0395 | 0.823  | 139  | 229  | 196  | 126  | 56   | 162  | 211  | 175  | 82   | 200  |
| <b>Higd1a</b>    | 0.3169 | 5.6706 | 4.7042 | 0.0301 | 0.7694 | 101  | 157  | 105  | 78   | 76   | 96   | 123  | 128  | 79   | 160  |
| <b>Enpp5</b>     | 0.3155 | 5.6829 | 4.1483 | 0.0417 | 0.8381 | 86   | 118  | 115  | 71   | 33   | 68   | 108  | 114  | 55   | 127  |
| <b>Rpl30</b>     | 0.3121 | 7.4404 | 5.7051 | 0.0169 | 0.6337 | 1201 | 1398 | 1426 | 1128 | 700  | 1198 | 1798 | 1165 | 666  | 1985 |
| <b>Zmiz2</b>     | 0.3115 | 5.5847 | 5.848  | 0.0156 | 0.6238 | 247  | 335  | 287  | 224  | 130  | 231  | 442  | 279  | 125  | 346  |
| <b>Madd</b>      | 0.3112 | 5.6355 | 4.2751 | 0.0387 | 0.8192 | 157  | 192  | 134  | 105  | 86   | 111  | 235  | 134  | 125  | 153  |
| <b>Ifitm1</b>    | 0.3112 | 8.0216 | 4.2646 | 0.0389 | 0.8206 | 2206 | 2464 | 2368 | 1801 | 1116 | 1617 | 2831 | 2126 | 1741 | 2588 |
| <b>Rpl22l1</b>   | 0.3099 | 5.9204 | 4.6925 | 0.0303 | 0.7699 | 393  | 484  | 419  | 351  | 160  | 418  | 570  | 428  | 164  | 502  |
| <b>Ptgr2</b>     | 0.3095 | 4.711  | 5.649  | 0.0175 | 0.6381 | 116  | 168  | 171  | 137  | 67   | 131  | 233  | 141  | 76   | 174  |
| <b>Kif1bp</b>    | 0.3094 | 5.7873 | 4.3336 | 0.0374 | 0.8131 | 103  | 110  | 111  | 69   | 82   | 79   | 147  | 125  | 55   | 155  |
| <b>Myl6</b>      | 0.3089 | 7.3087 | 4.3179 | 0.0377 | 0.8131 | 735  | 884  | 889  | 710  | 475  | 727  | 1040 | 702  | 460  | 1330 |
| <b>Rps10</b>     | 0.3085 | 8.616  | 3.9827 | 0.046  | 0.8611 | 2399 | 2977 | 2874 | 2614 | 1890 | 2690 | 3281 | 2353 | 1685 | 4809 |
| <b>Tmem230</b>   | 0.3077 | 5.1182 | 4.4259 | 0.0354 | 0.8091 | 105  | 153  | 112  | 84   | 63   | 111  | 129  | 109  | 64   | 171  |
| <b>Tjp3</b>      | 0.3075 | 5.3896 | 5.0424 | 0.0247 | 0.7217 | 299  | 452  | 425  | 308  | 213  | 283  | 607  | 411  | 174  | 517  |
| <b>Cdk2ap1</b>   | 0.3064 | 4.6169 | 4.1539 | 0.0415 | 0.8377 | 108  | 152  | 113  | 119  | 40   | 121  | 160  | 134  | 58   | 127  |
| <b>Fgfr1</b>     | 0.3064 | 6.2628 | 4.3018 | 0.0381 | 0.8131 | 56   | 134  | 146  | 110  | 40   | 101  | 136  | 90   | 52   | 162  |
| <b>Pnrc1</b>     | 0.3013 | 5.3568 | 4.0686 | 0.0437 | 0.851  | 129  | 245  | 149  | 136  | 88   | 123  | 224  | 249  | 60   | 210  |
| <b>Ptptra</b>    | 0.3002 | 6.5519 | 6.7888 | 0.0092 | 0.5176 | 302  | 406  | 291  | 285  | 143  | 357  | 404  | 396  | 172  | 274  |
| <b>Tomm70a</b>   | 0.3    | 6.7109 | 5.2711 | 0.0217 | 0.6958 | 274  | 275  | 330  | 186  | 158  | 222  | 331  | 277  | 181  | 364  |
| <b>Cct3</b>      | 0.3    | 6.8729 | 6.0076 | 0.0142 | 0.604  | 394  | 499  | 507  | 443  | 224  | 468  | 590  | 477  | 210  | 624  |



|                  |        |        |        |        |        |       |       |       |       |       |       |       |       |       |       |
|------------------|--------|--------|--------|--------|--------|-------|-------|-------|-------|-------|-------|-------|-------|-------|-------|
| <b>Tm9sf2</b>    | 0.2991 | 6.3513 | 5.4751 | 0.0193 | 0.6697 | 354   | 454   | 377   | 360   | 199   | 261   | 640   | 428   | 199   | 503   |
| <b>Mgat4b</b>    | 0.2972 | 5.217  | 3.8683 | 0.0492 | 0.8715 | 85    | 134   | 141   | 86    | 54    | 98    | 159   | 155   | 47    | 110   |
| <b>Lpin1</b>     | 0.2969 | 6.575  | 4.6746 | 0.0306 | 0.7712 | 104   | 105   | 87    | 92    | 60    | 89    | 120   | 130   | 55    | 120   |
| <b>Wdtdc1</b>    | 0.2952 | 6.0067 | 6.7238 | 0.0095 | 0.525  | 347   | 449   | 419   | 349   | 199   | 394   | 642   | 353   | 191   | 451   |
| <b>Dctn4</b>     | 0.2945 | 6.412  | 5.2384 | 0.0221 | 0.6995 | 212   | 283   | 270   | 201   | 167   | 228   | 355   | 280   | 131   | 319   |
| <b>Cnot2</b>     | 0.2911 | 5.2466 | 4.3901 | 0.0361 | 0.811  | 181   | 262   | 239   | 197   | 101   | 187   | 273   | 205   | 142   | 269   |
| <b>Rplp0</b>     | 0.2907 | 8.7677 | 4.8132 | 0.0282 | 0.7493 | 2644  | 3770  | 3896  | 2921  | 2327  | 3374  | 4587  | 3137  | 1764  | 5237  |
| <b>D10Jhu81e</b> | 0.2905 | 6.1783 | 5.0959 | 0.024  | 0.7183 | 243   | 350   | 312   | 222   | 141   | 276   | 418   | 261   | 133   | 351   |
| <b>Aqp1</b>      | 0.2892 | 8.2278 | 6.5264 | 0.0106 | 0.546  | 1345  | 2919  | 3065  | 2108  | 1305  | 2415  | 3549  | 2988  | 1087  | 2172  |
| <b>Asprv1</b>    | 0.2891 | 11.091 | 4.715  | 0.0299 | 0.7684 | 18063 | 21985 | 23481 | 19099 | 11259 | 21192 | 25534 | 22978 | 11611 | 24391 |
| <b>H3f3b</b>     | 0.2889 | 8.2624 | 4.9806 | 0.0256 | 0.7319 | 1986  | 2704  | 2350  | 1866  | 1172  | 1971  | 2658  | 2217  | 1123  | 3407  |
| <b>Eif3d</b>     | 0.2883 | 6.661  | 7.2687 | 0.007  | 0.4716 | 497   | 585   | 584   | 553   | 292   | 590   | 800   | 587   | 313   | 560   |
| <b>Pdpn</b>      | 0.288  | 6.8428 | 4.46   | 0.0347 | 0.8027 | 559   | 961   | 750   | 907   | 320   | 704   | 1057  | 922   | 448   | 727   |
| <b>Csnk1g3</b>   | 0.288  | 5.9505 | 5.262  | 0.0218 | 0.6976 | 230   | 331   | 300   | 251   | 173   | 307   | 352   | 295   | 151   | 351   |
| <b>Senp7</b>     | 0.2868 | 4.8937 | 4.1963 | 0.0405 | 0.8329 | 110   | 168   | 144   | 115   | 84    | 117   | 183   | 185   | 69    | 153   |
| <b>Prdx1</b>     | 0.286  | 7.7186 | 4.9978 | 0.0254 | 0.7274 | 1077  | 1461  | 1318  | 1032  | 586   | 1236  | 1397  | 1128  | 588   | 1759  |
| <b>Psma6</b>     | 0.2809 | 7.0251 | 6.9096 | 0.0086 | 0.5048 | 526   | 678   | 592   | 406   | 316   | 607   | 632   | 609   | 279   | 695   |
| <b>Dtx3l</b>     | 0.2807 | 5.7825 | 7.4848 | 0.0062 | 0.4459 | 395   | 513   | 482   | 455   | 236   | 387   | 636   | 455   | 261   | 599   |
| <b>Pdcd5</b>     | 0.2804 | 6.0022 | 4.474  | 0.0344 | 0.8003 | 258   | 331   | 220   | 222   | 161   | 304   | 300   | 245   | 169   | 306   |
| <b>Gtf2i</b>     | 0.2799 | 6.5389 | 4.681  | 0.0305 | 0.7712 | 292   | 376   | 429   | 259   | 188   | 320   | 419   | 349   | 144   | 519   |
| <b>Mrpl11</b>    | 0.2789 | 5.3437 | 4.2269 | 0.0398 | 0.8246 | 125   | 172   | 127   | 101   | 70    | 117   | 174   | 156   | 66    | 155   |
| <b>Aldh3b2</b>   | 0.2784 | 6.6932 | 6.5738 | 0.0103 | 0.5435 | 798   | 1091  | 991   | 743   | 520   | 914   | 1053  | 934   | 532   | 1151  |
| <b>Dctn6</b>     | 0.2763 | 5.9567 | 5.0657 | 0.0244 | 0.7207 | 223   | 324   | 226   | 200   | 123   | 205   | 317   | 268   | 139   | 286   |
| <b>Acat2</b>     | 0.2752 | 6.6852 | 6.0111 | 0.0142 | 0.604  | 302   | 539   | 493   | 444   | 188   | 468   | 528   | 518   | 184   | 479   |
| <b>Dazap2</b>    | 0.273  | 7.3884 | 5.0252 | 0.025  | 0.7219 | 1031  | 1328  | 1300  | 914   | 548   | 897   | 1404  | 1234  | 557   | 1607  |
| <b>Nop16</b>     | 0.2724 | 4.9147 | 4.1921 | 0.0406 | 0.8329 | 135   | 160   | 166   | 127   | 65    | 128   | 236   | 181   | 69    | 122   |
| <b>Otud5</b>     | 0.272  | 5.3076 | 4.8936 | 0.027  | 0.7403 | 158   | 239   | 234   | 174   | 98    | 176   | 283   | 224   | 102   | 219   |
| <b>2410015M</b>  | 0.2713 | 5.9651 | 5.6574 | 0.0174 | 0.6381 | 343   | 459   | 391   | 309   | 205   | 419   | 538   | 297   | 197   | 457   |
| <b>Myeov2</b>    | 0.2664 | 7.7162 | 4.4637 | 0.0346 | 0.8027 | 519   | 721   | 557   | 462   | 384   | 582   | 776   | 455   | 340   | 813   |
| <b>Rap2c</b>     | 0.2644 | 5.3315 | 5.0238 | 0.025  | 0.7219 | 129   | 159   | 179   | 138   | 92    | 159   | 246   | 157   | 70    | 157   |
| <b>Tmsb4x</b>    | 0.2642 | 12.325 | 4.6248 | 0.0315 | 0.7738 | 36652 | 43220 | 44653 | 36924 | 22121 | 35277 | 49614 | 33989 | 24003 | 59386 |
| <b>Med16</b>     | 0.2637 | 5.1663 | 4.6405 | 0.0312 | 0.7726 | 141   | 179   | 214   | 160   | 83    | 171   | 277   | 187   | 79    | 157   |
| <b>Eif1ax</b>    | 0.2618 | 6.0547 | 4.3043 | 0.038  | 0.8131 | 245   | 400   | 335   | 302   | 164   | 316   | 411   | 246   | 178   | 429   |
| <b>Aldh9a1</b>   | 0.2606 | 5.6098 | 4.2315 | 0.0397 | 0.8235 | 126   | 231   | 195   | 199   | 90    | 183   | 267   | 217   | 80    | 190   |
| <b>Lsm3</b>      | 0.2596 | 5.585  | 4.0491 | 0.0442 | 0.8548 | 260   | 322   | 326   | 213   | 163   | 303   | 366   | 278   | 166   | 296   |
| <b>Zfand3</b>    | 0.2587 | 6.1036 | 3.9335 | 0.0473 | 0.8678 | 292   | 441   | 356   | 353   | 171   | 313   | 421   | 356   | 198   | 467   |
| <b>Elf3</b>      | 0.2576 | 7.8841 | 4.9628 | 0.0259 | 0.7335 | 2048  | 2781  | 2418  | 1670  | 1116  | 2093  | 3156  | 2005  | 1053  | 2828  |
| <b>Cysrt1</b>    | 0.2575 | 6.4582 | 4.2697 | 0.0388 | 0.8196 | 656   | 925   | 945   | 689   | 548   | 833   | 1067  | 796   | 490   | 991   |
| <b>Hspb1</b>     | 0.2574 | 8.4923 | 4.2218 | 0.0399 | 0.8261 | 2519  | 3340  | 3312  | 2271  | 1523  | 2505  | 3716  | 2628  | 1394  | 4147  |
| <b>Bsg</b>       | 0.2541 | 8.3779 | 5.5877 | 0.0181 | 0.6487 | 1431  | 2454  | 2093  | 1578  | 1026  | 1662  | 2324  | 1877  | 894   | 2693  |
| <b>Timm17a</b>   | 0.2539 | 6.073  | 4.193  | 0.0406 | 0.8329 | 176   | 222   | 222   | 192   | 99    | 243   | 239   | 179   | 119   | 205   |
| <b>Mdp1</b>      | 0.2536 | 5.9027 | 5.0504 | 0.0246 | 0.7214 | 312   | 405   | 358   | 310   | 164   | 348   | 557   | 400   | 154   | 276   |
| <b>Uba52</b>     | 0.2521 | 6.9437 | 4.6884 | 0.0304 | 0.7699 | 854   | 968   | 944   | 638   | 478   | 916   | 1167  | 769   | 451   | 993   |
| <b>Romo1</b>     | 0.2495 | 6.7735 | 4.1038 | 0.0428 | 0.845  | 431   | 471   | 477   | 421   | 204   | 454   | 611   | 434   | 190   | 545   |
| <b>Trove2</b>    | 0.2486 | 6.2844 | 5.7193 | 0.0168 | 0.6337 | 292   | 377   | 346   | 235   | 156   | 342   | 435   | 293   | 146   | 328   |
| <b>Itm2c</b>     | 0.2485 | 7.9307 | 6.0155 | 0.0142 | 0.604  | 455   | 742   | 630   | 484   | 280   | 520   | 862   | 613   | 263   | 598   |
| <b>2310007B0</b> | 0.2478 | 7.2007 | 5.7412 | 0.0166 | 0.6322 | 1308  | 1503  | 1702  | 1297  | 674   | 1109  | 2149  | 1683  | 736   | 1492  |
| <b>Rps7</b>      | 0.2449 | 7.9259 | 4.6633 | 0.0308 | 0.772  | 1555  | 2229  | 2017  | 1500  | 1196  | 1964  | 2285  | 1749  | 990   | 2395  |
| <b>Slc3a2</b>    | 0.2422 | 6.9962 | 4.4157 | 0.0356 | 0.811  | 558   | 827   | 702   | 545   | 215   | 509   | 859   | 719   | 298   | 656   |
| <b>Peli1</b>     | 0.2374 | 5.5687 | 4.1375 | 0.0419 | 0.8418 | 214   | 264   | 255   | 198   | 114   | 175   | 322   | 227   | 113   | 308   |
| <b>Emd</b>       | 0.236  | 5.8181 | 4.0168 | 0.0451 | 0.8577 | 310   | 359   | 387   | 285   | 174   | 384   | 358   | 373   | 168   | 351   |
| <b>Rps13</b>     | 0.2339 | 8.9246 | 4.7803 | 0.0288 | 0.7541 | 3511  | 4107  | 4403  | 3202  | 2084  | 3855  | 4685  | 3415  | 1778  | 5286  |
| <b>Ech1</b>      | 0.2338 | 6.3261 | 4.6944 | 0.0303 | 0.7699 | 377   | 556   | 512   | 433   | 245   | 454   | 628   | 426   | 223   | 585   |
| <b>Pcmt1</b>     | 0.2325 | 6.9294 | 4.6564 | 0.0309 | 0.7726 | 190   | 287   | 283   | 177   | 125   | 219   | 299   | 241   | 114   | 273   |
| <b>Vapa</b>      | 0.2316 | 7.318  | 4.5461 | 0.033  | 0.7852 | 567   | 888   | 925   | 673   | 379   | 672   | 795   | 747   | 390   | 1039  |
| <b>Srsf3</b>     | 0.2281 | 7.0924 | 4.6845 | 0.0304 | 0.7706 | 736   | 1014  | 1004  | 697   | 447   | 762   | 1072  | 834   | 428   | 1104  |
| <b>Sec31a</b>    | 0.223  | 6.76   | 5.0244 | 0.025  | 0.7219 | 506   | 684   | 613   | 547   | 271   | 568   | 838   | 664   | 270   | 504   |
| <b>Eif3f</b>     | 0.2226 | 7.9159 | 4.0117 | 0.0452 | 0.8577 | 1543  | 2016  | 2143  | 1468  | 774   | 1636  | 2078  | 1533  | 821   | 2361  |
| <b>Mgat4a</b>    | 0.2222 | 5.7947 | 6.3155 | 0.012  | 0.5636 | 331   | 468   | 411   | 299   | 167   | 331   | 484   | 399   | 189   | 382   |
| <b>Rbx1</b>      | 0.2211 | 7.1775 | 4.0162 | 0.0451 | 0.8577 | 481   | 628   | 583   | 475   | 267   | 464   | 703   | 517   | 245   | 711   |
| <b>Mrps23</b>    | 0.2201 | 5.9281 | 4.3552 | 0.0369 | 0.8131 | 301   | 338   | 353   | 272   | 137   | 284   | 465   | 303   | 141   | 327   |
| <b>Dnpep</b>     | 0.22   | 6.1739 | 5.367  | 0.0205 | 0.6861 | 344   | 497   | 456   | 382   | 199   | 361   | 568   | 380   | 238   | 448   |

|                            |         |         |        |        |        |      |      |      |      |      |      |      |      |      |      |
|----------------------------|---------|---------|--------|--------|--------|------|------|------|------|------|------|------|------|------|------|
| <b>Ndufb8</b>              | 0.2119  | 8.2806  | 4.6358 | 0.0313 | 0.7726 | 694  | 809  | 767  | 592  | 440  | 749  | 915  | 705  | 365  | 849  |
| <b>Acly</b>                | 0.2109  | 7.804   | 4.3107 | 0.0379 | 0.8131 | 755  | 1169 | 1252 | 938  | 532  | 828  | 1342 | 994  | 517  | 1270 |
| <b>Hspa5</b>               | 0.201   | 8.9417  | 4.67   | 0.0307 | 0.772  | 2152 | 3169 | 3174 | 2288 | 1263 | 2373 | 3301 | 2660 | 1471 | 2652 |
| <b>Tsn</b>                 | 0.2007  | 7.8372  | 4.5915 | 0.0321 | 0.7798 | 785  | 983  | 977  | 805  | 436  | 850  | 1248 | 983  | 352  | 891  |
| <b>Eif3g</b>               | 0.19    | 6.8086  | 4.1616 | 0.0413 | 0.8377 | 604  | 730  | 767  | 569  | 349  | 647  | 891  | 592  | 347  | 702  |
| <b>Puf60</b>               | 0.181   | 7.2924  | 3.9947 | 0.0456 | 0.8597 | 615  | 793  | 727  | 531  | 338  | 590  | 903  | 589  | 378  | 651  |
| <b>Downregulated genes</b> |         |         |        |        |        |      |      |      |      |      |      |      |      |      |      |
| <b>Crybb1</b>              | -5.8537 | 2.6156  | 23.178 | 1E-06  | 0.0158 | 205  | 59   | 0    | 0    | 0    | 0    | 0    | 1    | 2    | 0    |
| <b>Alox12e</b>             | -5.7134 | 1.8953  | 14.239 | 0.0002 | 0.0813 | 415  | 0    | 2    | 1    | 7    | 2    | 0    | 2    | 1    | 2    |
| <b>Lgsn</b>                | -5.6375 | 0.1608  | 7.2142 | 0.0072 | 0.4784 | 78   | 5    | 0    | 0    | 0    | 0    | 0    | 1    | 0    | 0    |
| <b>Crygc</b>               | -5.5019 | 2.9154  | 17.11  | 4E-05  | 0.0415 | 799  | 183  | 7    | 2    | 0    | 5    | 0    | 10   | 2    | 2    |
| <b>Cplx4</b>               | -5.434  | -0.4588 | 8.2151 | 0.0042 | 0.3832 | 25   | 2    | 3    | 0    | 0    | 0    | 0    | 0    | 0    | 0    |
| <b>Crygd</b>               | -5.4191 | 2.6982  | 11.981 | 0.0005 | 0.151  | 711  | 107  | 1    | 3    | 0    | 0    | 0    | 6    | 7    | 0    |
| <b>Sult1c1</b>             | -5.2849 | -0.5745 | 5.459  | 0.0195 | 0.6702 | 21   | 0    | 0    | 0    | 3    | 0    | 0    | 0    | 0    | 0    |
| <b>Zfp385b</b>             | -5.1447 | 5.4046  | 31.474 | 2E-08  | 0.0004 | 20   | 0    | 0    | 5    | 0    | 0    | 0    | 0    | 0    | 0    |
| <b>Crygb</b>               | -5.0943 | 3.7334  | 14.103 | 0.0002 | 0.0841 | 1512 | 272  | 4    | 7    | 3    | 6    | 10   | 23   | 8    | 0    |
| <b>Ajap1</b>               | -5.0285 | 0.4295  | 12.167 | 0.0005 | 0.1486 | 0    | 2    | 3    | 0    | 12   | 0    | 0    | 0    | 0    | 0    |
| <b>Nrl</b>                 | -4.998  | -0.4131 | 5.2265 | 0.0222 | 0.6995 | 21   | 0    | 0    | 0    | 0    | 0    | 0    | 0    | 0    | 0    |
| <b>Rorb</b>                | -4.9942 | 0.8477  | 18.688 | 2E-05  | 0.0264 | 18   | 2    | 2    | 0    | 0    | 0    | 0    | 0    | 0    | 0    |
| <b>BC040756</b>            | -4.9311 | -0.3597 | 6.8548 | 0.0088 | 0.5121 | 0    | 0    | 0    | 3    | 11   | 0    | 0    | 0    | 0    | 0    |
| <b>Aipl1</b>               | -4.8726 | -0.136  | 10.427 | 0.0012 | 0.2316 | 31   | 18   | 1    | 4    | 0    | 0    | 0    | 0    | 0    | 1    |
| <b>Arl4aos</b>             | -4.8286 | -0.5825 | 11.335 | 0.0008 | 0.1795 | 6    | 8    | 5    | 0    | 2    | 0    | 0    | 0    | 0    | 0    |
| <b>Gm15446</b>             | -4.8043 | 0.0484  | 11.654 | 0.0006 | 0.1658 | 11   | 8    | 0    | 0    | 1    | 0    | 0    | 0    | 0    | 0    |
| <b>Cryba2</b>              | -4.7675 | 2.8083  | 12.16  | 0.0005 | 0.1486 | 544  | 299  | 0    | 1    | 0    | 4    | 0    | 15   | 5    | 0    |
| <b>Serpine2</b>            | -4.7588 | 6.2714  | 20.969 | 5E-06  | 0.0162 | 176  | 0    | 1    | 0    | 15   | 0    | 8    | 0    | 0    | 0    |
| <b>Ernm</b>                | -4.7251 | 4.1184  | 20.855 | 5E-06  | 0.0162 | 18   | 0    | 0    | 0    | 0    | 0    | 0    | 0    | 0    | 0    |
| <b>Adra1d</b>              | -4.6668 | -0.6319 | 4.9516 | 0.0261 | 0.7335 | 4    | 0    | 0    | 0    | 8    | 0    | 0    | 0    | 0    | 0    |
| <b>Hist1h4m</b>            | -4.659  | -0.0948 | 10.725 | 0.0011 | 0.2112 | 3    | 0    | 0    | 5    | 6    | 0    | 0    | 0    | 0    | 0    |
| <b>LOC105247</b>           | -4.6411 | -0.5402 | 6.005  | 0.0143 | 0.604  | 0    | 3    | 0    | 5    | 6    | 0    | 0    | 0    | 0    | 0    |
| <b>Gnat2</b>               | -4.602  | -0.1326 | 11.225 | 0.0008 | 0.1804 | 5    | 12   | 0    | 2    | 0    | 0    | 0    | 0    | 0    | 0    |
| <b>Rp1</b>                 | -4.5564 | 0.056   | 10.411 | 0.0013 | 0.2316 | 45   | 6    | 7    | 0    | 3    | 0    | 1    | 0    | 0    | 1    |
| <b>Crybb2</b>              | -4.5432 | 3.5299  | 13.905 | 0.0002 | 0.0876 | 1100 | 394  | 1    | 0    | 0    | 8    | 14   | 25   | 9    | 0    |
| <b>Cryaa</b>               | -4.5285 | 3.7426  | 10.101 | 0.0015 | 0.2474 | 1167 | 690  | 24   | 6    | 0    | 12   | 0    | 26   | 19   | 0    |
| <b>5033417F2</b>           | -4.5234 | 0.4483  | 14.342 | 0.0002 | 0.0808 | 1    | 4    | 7    | 4    | 1    | 0    | 0    | 0    | 0    | 0    |
| <b>Gm42072</b>             | -4.5216 | -0.621  | 6.3267 | 0.0119 | 0.5628 | 0    | 0    | 5    | 2    | 6    | 0    | 0    | 0    | 0    | 0    |
| <b>Astn2</b>               | -4.4805 | 3.6378  | 19.565 | 1E-05  | 0.0206 | 0    | 9    | 2    | 4    | 1    | 0    | 0    | 0    | 0    | 0    |
| <b>Gm40491</b>             | -4.4752 | -0.6178 | 6.3863 | 0.0115 | 0.5577 | 1    | 5    | 13   | 0    | 0    | 0    | 0    | 0    | 0    | 0    |
| <b>Gm31963</b>             | -4.4656 | -0.3769 | 6.82   | 0.009  | 0.5147 | 5    | 13   | 0    | 0    | 0    | 0    | 0    | 0    | 0    | 0    |
| <b>LOC102635</b>           | -4.4423 | -0.0603 | 11.61  | 0.0007 | 0.1674 | 7    | 3    | 1    | 0    | 3    | 0    | 0    | 0    | 0    | 0    |
| <b>2810408B1</b>           | -4.4158 | -0.5989 | 5.7703 | 0.0163 | 0.6285 | 0    | 0    | 0    | 0    | 9    | 0    | 0    | 0    | 0    | 0    |
| <b>Gm41668</b>             | -4.4138 | -0.2254 | 10.424 | 0.0012 | 0.2316 | 2    | 0    | 6    | 3    | 3    | 0    | 0    | 0    | 0    | 0    |
| <b>Gper1</b>               | -4.4133 | 0.405   | 14.847 | 0.0001 | 0.0688 | 2    | 0    | 7    | 5    | 1    | 0    | 0    | 0    | 0    | 0    |
| <b>Xlr3a</b>               | -4.4065 | 0.3731  | 9.0961 | 0.0026 | 0.3165 | 2    | 0    | 4    | 0    | 6    | 0    | 0    | 0    | 0    | 0    |
| <b>Ciita</b>               | -4.4018 | 1.3129  | 15.615 | 8E-05  | 0.055  | 5    | 3    | 3    | 4    | 0    | 0    | 0    | 0    | 0    | 0    |
| <b>Col10a1</b>             | -4.3655 | -0.3152 | 8.8685 | 0.0029 | 0.3294 | 0    | 1    | 10   | 2    | 2    | 0    | 0    | 0    | 0    | 0    |
| <b>4931428F0</b>           | -4.3529 | 1.1713  | 15.136 | 0.0001 | 0.0631 | 0    | 2    | 0    | 5    | 6    | 0    | 0    | 0    | 0    | 0    |
| <b>Rpe65</b>               | -4.341  | -0.0405 | 4.4379 | 0.0352 | 0.8066 | 33   | 0    | 0    | 0    | 0    | 0    | 0    | 0    | 0    | 1    |
| <b>Xist</b>                | -4.3326 | -0.366  | 7.0852 | 0.0078 | 0.4918 | 0    | 6    | 5    | 5    | 0    | 0    | 0    | 0    | 0    | 0    |
| <b>Aadac</b>               | -4.3325 | -0.0961 | 13.018 | 0.0003 | 0.1116 | 26   | 2    | 1    | 4    | 1    | 1    | 0    | 0    | 0    | 0    |
| <b>Dhh</b>                 | -4.3168 | 5.5734  | 18.047 | 2E-05  | 0.031  | 1    | 2    | 4    | 6    | 1    | 0    | 0    | 0    | 0    | 0    |
| <b>Cysltr1</b>             | -4.3015 | 0.2999  | 10.671 | 0.0011 | 0.2152 | 2    | 1    | 0    | 2    | 6    | 0    | 0    | 0    | 0    | 0    |
| <b>5430427M</b>            | -4.2848 | -0.6068 | 8.2354 | 0.0041 | 0.3832 | 7    | 1    | 0    | 5    | 0    | 0    | 0    | 0    | 0    | 0    |
| <b>Wdr17</b>               | -4.2811 | 3.1305  | 16.703 | 4E-05  | 0.0442 | 0    | 8    | 4    | 1    | 1    | 0    | 0    | 0    | 0    | 0    |
| <b>Xrra1</b>               | -4.2706 | -0.4014 | 11.678 | 0.0006 | 0.1658 | 0    | 5    | 3    | 5    | 1    | 0    | 0    | 0    | 0    | 0    |
| <b>Gm31420</b>             | -4.2697 | -0.5697 | 6.2516 | 0.0124 | 0.5751 | 5    | 0    | 0    | 3    | 3    | 0    | 0    | 0    | 0    | 0    |
| <b>Crygs</b>               | -4.2588 | 3.3231  | 17.085 | 4E-05  | 0.0415 | 805  | 279  | 1    | 3    | 0    | 7    | 0    | 15   | 15   | 4    |
| <b>4930500AC</b>           | -4.2248 | -0.219  | 8.8647 | 0.0029 | 0.3294 | 0    | 6    | 0    | 2    | 4    | 0    | 0    | 0    | 0    | 0    |
| <b>LOC108168</b>           | -4.2231 | -0.0646 | 11.846 | 0.0006 | 0.1563 | 1    | 6    | 5    | 1    | 1    | 0    | 0    | 0    | 0    | 0    |
| <b>LOC108168</b>           | -4.2215 | -0.6948 | 4.5465 | 0.033  | 0.7852 | 0    | 6    | 0    | 8    | 0    | 0    | 0    | 0    | 0    | 0    |
| <b>Ina</b>                 | -4.2057 | 3.6798  | 16.437 | 5E-05  | 0.0459 | 2    | 4    | 6    | 0    | 1    | 0    | 0    | 0    | 0    | 0    |
| <b>Hist1h2ad</b>           | -4.196  | -0.6904 | 11.037 | 0.0009 | 0.1888 | 4    | 3    | 2    | 0    | 3    | 0    | 0    | 0    | 0    | 0    |
| <b>Gm39412</b>             | -4.1902 | -0.5032 | 7.3301 | 0.0068 | 0.4647 | 4    | 0    | 10   | 0    | 0    | 0    | 0    | 0    | 0    | 0    |

|           |         |         |        |        |        |      |     |    |    |    |    |    |    |    |    |
|-----------|---------|---------|--------|--------|--------|------|-----|----|----|----|----|----|----|----|----|
| Gm11744   | -4.1858 | 0.5224  | 11.478 | 0.0007 | 0.1735 | 5    | 0   | 4  | 1  | 2  | 0  | 0  | 0  | 0  | 0  |
| Pnliprp2  | -4.1213 | -0.6299 | 5.9725 | 0.0145 | 0.6057 | 0    | 7   | 6  | 0  | 1  | 0  | 0  | 0  | 0  | 0  |
| D630024D1 | -4.1123 | -0.3307 | 7.9086 | 0.0049 | 0.4069 | 3    | 2   | 3  | 0  | 3  | 0  | 0  | 0  | 0  | 0  |
| Cryge     | -4.1103 | -0.2577 | 4.0202 | 0.045  | 0.8577 | 38   | 2   | 0  | 0  | 0  | 0  | 2  | 0  | 0  | 0  |
| Gm30575   | -4.0998 | 0.1703  | 10.645 | 0.0011 | 0.217  | 4    | 9   | 0  | 0  | 0  | 0  | 0  | 0  | 0  | 0  |
| Gm10384   | -4.0966 | -0.5256 | 4.0275 | 0.0448 | 0.8574 | 9    | 0   | 0  | 2  | 0  | 0  | 0  | 0  | 0  | 0  |
| Gm4876    | -4.096  | -0.5453 | 10.223 | 0.0014 | 0.2411 | 5    | 4   | 0  | 3  | 0  | 0  | 0  | 0  | 0  | 0  |
| C330024D2 | -4.0891 | 0.2662  | 9.7627 | 0.0018 | 0.2615 | 4    | 0   | 5  | 3  | 0  | 0  | 0  | 0  | 0  | 0  |
| Gm35658   | -4.076  | 0.1875  | 8.9964 | 0.0027 | 0.3201 | 0    | 2   | 0  | 4  | 4  | 0  | 0  | 0  | 0  | 0  |
| Dscaml1   | -4.0729 | 1.4247  | 11.504 | 0.0007 | 0.1723 | 11   | 0   | 0  | 0  | 0  | 0  | 0  | 0  | 0  | 0  |
| Gm10710   | -4.0723 | -0.1708 | 8.4031 | 0.0037 | 0.3726 | 0    | 12  | 1  | 1  | 0  | 0  | 0  | 0  | 0  | 0  |
| Gm39443   | -4.0629 | -0.3657 | 5.2308 | 0.0222 | 0.6995 | 1    | 0   | 0  | 10 | 0  | 0  | 0  | 0  | 0  | 0  |
| Gm15934   | -4.0491 | -0.6541 | 4.9241 | 0.0265 | 0.7377 | 6    | 0   | 0  | 0  | 3  | 0  | 0  | 0  | 0  | 0  |
| Hist1h4k  | -4.0297 | -0.7573 | 4.341  | 0.0372 | 0.8131 | 0    | 0   | 0  | 6  | 3  | 0  | 0  | 0  | 0  | 0  |
| Ptgs2os2  | -4.0223 | -0.6267 | 8.5674 | 0.0034 | 0.3548 | 0    | 1   | 6  | 5  | 0  | 0  | 0  | 0  | 0  | 0  |
| Slc9b1    | -4.0208 | 0.0655  | 6.9965 | 0.0082 | 0.4992 | 0    | 13  | 1  | 0  | 0  | 0  | 0  | 0  | 0  | 0  |
| Hsf5      | -3.9937 | -0.2899 | 7.2993 | 0.0069 | 0.4703 | 2    | 4   | 3  | 0  | 2  | 0  | 0  | 0  | 0  | 0  |
| Tmem59l   | -3.9914 | 5.433   | 14.199 | 0.0002 | 0.0813 | 3    | 0   | 2  | 6  | 0  | 0  | 0  | 0  | 0  | 0  |
| Gm36012   | -3.9904 | 0.3662  | 19.904 | 8E-06  | 0.0206 | 3    | 13  | 7  | 4  | 14 | 0  | 0  | 1  | 0  | 1  |
| Psemb11   | -3.9889 | -0.3707 | 6.8262 | 0.009  | 0.5138 | 1    | 0   | 3  | 7  | 0  | 0  | 0  | 0  | 0  | 0  |
| Ablim3    | -3.9864 | 3.8246  | 13.932 | 0.0002 | 0.0874 | 1    | 4   | 0  | 6  | 0  | 0  | 0  | 0  | 0  | 0  |
| Pi16      | -3.9713 | 0.1847  | 6.8351 | 0.0089 | 0.5138 | 10   | 0   | 0  | 0  | 0  | 0  | 0  | 0  | 0  | 0  |
| Ckm       | -3.9576 | -0.3574 | 6.1829 | 0.0129 | 0.5845 | 0    | 0   | 9  | 0  | 2  | 0  | 0  | 0  | 0  | 0  |
| LOC108167 | -3.95   | -0.7277 | 7.2671 | 0.007  | 0.4716 | 6    | 2   | 3  | 0  | 0  | 0  | 0  | 0  | 0  | 0  |
| Clec14a   | -3.9449 | 0.5915  | 11.263 | 0.0008 | 0.1801 | 2    | 4   | 0  | 0  | 4  | 0  | 0  | 0  | 0  | 0  |
| Lrtm1     | -3.9421 | -0.4403 | 5.88   | 0.0153 | 0.6176 | 9    | 0   | 1  | 0  | 0  | 0  | 0  | 0  | 0  | 0  |
| LOC108168 | -3.9267 | -0.4527 | 7.2604 | 0.007  | 0.4722 | 3    | 0   | 0  | 4  | 2  | 0  | 0  | 0  | 0  | 0  |
| 1700015E1 | -3.9254 | -0.4482 | 6.3692 | 0.0116 | 0.5577 | 0    | 3   | 4  | 0  | 3  | 0  | 0  | 0  | 0  | 0  |
| Gm10433   | -3.9236 | -0.7237 | 6.9247 | 0.0085 | 0.5048 | 2    | 0   | 3  | 4  | 1  | 0  | 0  | 0  | 0  | 0  |
| Gm6329    | -3.9234 | -0.8494 | 5.2852 | 0.0215 | 0.6958 | 0    | 0   | 1  | 3  | 4  | 0  | 0  | 0  | 0  | 0  |
| Meox1     | -3.9198 | 1.8613  | 11.636 | 0.0006 | 0.1663 | 10   | 0   | 0  | 0  | 0  | 0  | 0  | 0  | 0  | 0  |
| Gm36591   | -3.8998 | -0.4667 | 7.1757 | 0.0074 | 0.4825 | 0    | 6   | 1  | 0  | 3  | 0  | 0  | 0  | 0  | 0  |
| Erich6    | -3.897  | 0.2108  | 7.6475 | 0.0057 | 0.434  | 1    | 5   | 0  | 2  | 2  | 0  | 0  | 0  | 0  | 0  |
| 493040710 | -3.8929 | 0.3065  | 9.4477 | 0.0021 | 0.2865 | 0    | 12  | 0  | 0  | 0  | 0  | 0  | 0  | 0  | 0  |
| Rho       | -3.8887 | 2.5792  | 16.864 | 4E-05  | 0.0438 | 364  | 15  | 24 | 5  | 9  | 9  | 8  | 0  | 0  | 12 |
| Gata1     | -3.8827 | -0.6452 | 5.7118 | 0.0169 | 0.6337 | 0    | 3   | 3  | 5  | 0  | 0  | 0  | 0  | 0  | 0  |
| Gm32707   | -3.8595 | -0.8108 | 6.325  | 0.0119 | 0.5628 | 2    | 0   | 0  | 3  | 3  | 0  | 0  | 0  | 0  | 0  |
| Gm39098   | -3.859  | -0.6603 | 6.9251 | 0.0085 | 0.5048 | 3    | 1   | 2  | 4  | 0  | 0  | 0  | 0  | 0  | 0  |
| 9630013D2 | -3.8561 | 0.2424  | 10.359 | 0.0013 | 0.2316 | 1    | 8   | 2  | 0  | 0  | 0  | 0  | 0  | 0  | 0  |
| Cyp4a14   | -3.8515 | -0.8095 | 5.3819 | 0.0203 | 0.6835 | 1    | 0   | 1  | 0  | 5  | 0  | 0  | 0  | 0  | 0  |
| Frmf7     | -3.8513 | 0.9653  | 10.688 | 0.0011 | 0.2144 | 1    | 4   | 1  | 3  | 1  | 0  | 0  | 0  | 0  | 0  |
| Chad      | -3.8402 | 0.5817  | 8.1679 | 0.0043 | 0.3886 | 35   | 0   | 0  | 3  | 0  | 1  | 0  | 1  | 0  | 0  |
| LOC105246 | -3.8246 | -0.6583 | 8.1192 | 0.0044 | 0.392  | 0    | 2   | 2  | 6  | 0  | 0  | 0  | 0  | 0  | 0  |
| Cryba1    | -3.8188 | 3.6716  | 8.2354 | 0.0041 | 0.3832 | 1094 | 588 | 11 | 4  | 0  | 14 | 28 | 33 | 22 | 0  |
| Snord42a  | -3.8091 | -0.587  | 5.4274 | 0.0198 | 0.6761 | 3    | 0   | 0  | 0  | 4  | 0  | 0  | 0  | 0  | 0  |
| Gm40588   | -3.8088 | -0.5948 | 7.9679 | 0.0048 | 0.4019 | 4    | 3   | 2  | 1  | 0  | 0  | 0  | 0  | 0  | 0  |
| Gm36317   | -3.8061 | -0.3212 | 5.6792 | 0.0172 | 0.6364 | 0    | 9   | 1  | 0  | 1  | 0  | 0  | 0  | 0  | 0  |
| D17Ertd64 | -3.8038 | -0.7984 | 6.3718 | 0.0116 | 0.5577 | 2    | 0   | 5  | 3  | 0  | 0  | 0  | 0  | 0  | 0  |
| Gm35200   | -3.8037 | -0.4287 | 6.71   | 0.0096 | 0.525  | 3    | 3   | 1  | 0  | 2  | 0  | 0  | 0  | 0  | 0  |
| Gm33753   | -3.7896 | -0.6895 | 8.0074 | 0.0047 | 0.4019 | 3    | 2   | 0  | 3  | 1  | 0  | 0  | 0  | 0  | 0  |
| Wisp2     | -3.7858 | -0.4421 | 5.9951 | 0.0143 | 0.6045 | 14   | 0   | 5  | 0  | 3  | 0  | 0  | 0  | 0  | 1  |
| Ttr       | -3.7851 | 2.06    | 9.6521 | 0.0019 | 0.2722 | 287  | 8   | 13 | 1  | 0  | 15 | 0  | 1  | 0  | 5  |
| Gm39011   | -3.7796 | -0.7932 | 6.0911 | 0.0136 | 0.6001 | 0    | 2   | 0  | 3  | 3  | 0  | 0  | 0  | 0  | 0  |
| Sun3      | -3.7757 | -0.1958 | 9.5049 | 0.002  | 0.2825 | 1    | 3   | 2  | 0  | 3  | 0  | 0  | 0  | 0  | 0  |
| Flnc      | -3.7754 | 0.7485  | 9.1013 | 0.0026 | 0.3165 | 0    | 0   | 0  | 4  | 4  | 0  | 0  | 0  | 0  | 0  |
| Asgr1     | -3.7658 | 1.6832  | 10.078 | 0.0015 | 0.2478 | 1    | 0   | 2  | 5  | 1  | 0  | 0  | 0  | 0  | 0  |
| E030003E1 | -3.7644 | -0.471  | 6.0363 | 0.014  | 0.604  | 1    | 6   | 4  | 0  | 0  | 0  | 0  | 0  | 0  | 0  |
| Gm5464    | -3.7587 | -0.4239 | 5.2982 | 0.0213 | 0.6958 | 0    | 0   | 1  | 8  | 0  | 0  | 0  | 0  | 0  | 0  |
| Mcoln2    | -3.7516 | -0.5652 | 6.5389 | 0.0106 | 0.5456 | 4    | 6   | 0  | 0  | 0  | 0  | 0  | 0  | 0  | 0  |
| Tmem72    | -3.7474 | 3.7131  | 10.924 | 0.0009 | 0.1951 | 8    | 1   | 0  | 0  | 0  | 0  | 0  | 0  | 0  | 0  |
| Bpifb9a   | -3.7436 | -0.4979 | 7.1297 | 0.0076 | 0.4871 | 0    | 6   | 0  | 4  | 0  | 0  | 0  | 0  | 0  | 0  |
| 170001611 | -3.741  | -0.3233 | 5.8401 | 0.0157 | 0.6238 | 4    | 0   | 2  | 0  | 2  | 0  | 0  | 0  | 0  | 0  |

|           |         |         |        |        |        |     |    |    |    |   |   |   |   |   |   |
|-----------|---------|---------|--------|--------|--------|-----|----|----|----|---|---|---|---|---|---|
| Slc6a13   | -3.7316 | 3.0848  | 11.29  | 0.0008 | 0.1801 | 2   | 1  | 0  | 6  | 0 | 0 | 0 | 0 | 0 | 0 |
| LOC108165 | -3.7202 | -0.1563 | 6.471  | 0.011  | 0.5486 | 0   | 2  | 0  | 7  | 0 | 0 | 0 | 0 | 0 | 0 |
| Hmgcs2    | -3.7152 | 5.2192  | 11.557 | 0.0007 | 0.171  | 1   | 0  | 7  | 0  | 1 | 0 | 0 | 0 | 0 | 0 |
| Nkain1    | -3.7141 | 3.301   | 11.205 | 0.0008 | 0.1805 | 5   | 4  | 0  | 0  | 0 | 0 | 0 | 0 | 0 | 0 |
| Gm36486   | -3.7137 | -0.5448 | 7.4903 | 0.0062 | 0.4459 | 0   | 1  | 6  | 0  | 2 | 0 | 0 | 0 | 0 | 0 |
| LOC102638 | -3.7124 | 0.0632  | 7.6258 | 0.0058 | 0.4358 | 0   | 0  | 9  | 1  | 0 | 0 | 0 | 0 | 0 | 0 |
| Gm41055   | -3.7122 | 0.1683  | 12.905 | 0.0003 | 0.1145 | 2   | 6  | 6  | 2  | 6 | 0 | 0 | 0 | 0 | 1 |
| Gria4     | -3.7047 | 4.9637  | 11.41  | 0.0007 | 0.1775 | 0   | 0  | 9  | 0  | 0 | 0 | 0 | 0 | 0 | 0 |
| Cryba4    | -3.6984 | 1.9539  | 9.8694 | 0.0017 | 0.261  | 243 | 81 | 9  | 13 | 0 | 9 | 0 | 0 | 4 | 8 |
| Fgfr4     | -3.6976 | -0.6431 | 3.8634 | 0.0493 | 0.8716 | 0   | 2  | 5  | 3  | 0 | 0 | 0 | 0 | 0 | 0 |
| Apobr     | -3.6865 | -0.6258 | 4.6016 | 0.0319 | 0.7798 | 5   | 0  | 4  | 0  | 0 | 0 | 0 | 0 | 0 | 0 |
| Matk      | -3.6821 | 0.5236  | 8.9122 | 0.0028 | 0.3266 | 0   | 7  | 0  | 0  | 2 | 0 | 0 | 0 | 0 | 0 |
| Stmn1-rs1 | -3.6779 | -0.7041 | 5.08   | 0.0242 | 0.7184 | 0   | 3  | 0  | 0  | 4 | 0 | 0 | 0 | 0 | 0 |
| Tnn       | -3.6708 | -0.4423 | 4.3154 | 0.0378 | 0.8131 | 2   | 0  | 0  | 0  | 4 | 0 | 0 | 0 | 0 | 0 |
| Casp4     | -3.656  | 0.2037  | 7.7168 | 0.0055 | 0.4316 | 8   | 0  | 0  | 0  | 0 | 0 | 0 | 0 | 0 | 0 |
| Snora7a   | -3.6503 | 0.6559  | 13.335 | 0.0003 | 0.107  | 14  | 3  | 0  | 3  | 1 | 0 | 0 | 1 | 0 | 0 |
| Gm40617   | -3.6437 | -0.6737 | 5.7271 | 0.0167 | 0.6337 | 0   | 4  | 0  | 5  | 0 | 0 | 0 | 0 | 0 | 0 |
| Slc7a15   | -3.6319 | -0.144  | 5.9912 | 0.0144 | 0.6045 | 0   | 0  | 0  | 8  | 0 | 0 | 0 | 0 | 0 | 0 |
| Vax2      | -3.6318 | -0.7282 | 4.1507 | 0.0416 | 0.8381 | 1   | 8  | 0  | 1  | 0 | 0 | 0 | 0 | 0 | 0 |
| Gm30918   | -3.6315 | -0.7215 | 3.8895 | 0.0486 | 0.8678 | 0   | 0  | 0  | 8  | 0 | 0 | 0 | 0 | 0 | 0 |
| Gm33325   | -3.6307 | -0.7606 | 5.5248 | 0.0187 | 0.6593 | 0   | 1  | 4  | 4  | 0 | 0 | 0 | 0 | 0 | 0 |
| Gm29940   | -3.6172 | -0.4067 | 5.5559 | 0.0184 | 0.6548 | 0   | 2  | 0  | 2  | 3 | 0 | 0 | 0 | 0 | 0 |
| Gck       | -3.6151 | 0.3063  | 7.9826 | 0.0047 | 0.4019 | 1   | 2  | 0  | 4  | 1 | 0 | 0 | 0 | 0 | 0 |
| Acat3     | -3.6137 | -0.406  | 6.6077 | 0.0102 | 0.543  | 0   | 9  | 1  | 0  | 0 | 0 | 0 | 0 | 0 | 0 |
| Gm38908   | -3.6135 | -0.5718 | 7.573  | 0.0059 | 0.4423 | 3   | 0  | 3  | 1  | 1 | 0 | 0 | 0 | 0 | 0 |
| Myrf      | -3.6064 | 1.7636  | 9.7118 | 0.0018 | 0.2651 | 8   | 0  | 0  | 0  | 0 | 0 | 0 | 0 | 0 | 0 |
| Gm39666   | -3.6017 | 1.6381  | 9.8118 | 0.0017 | 0.261  | 8   | 0  | 0  | 0  | 0 | 0 | 0 | 0 | 0 | 0 |
| Pkd2l2    | -3.567  | 0.4274  | 8.9299 | 0.0028 | 0.3251 | 0   | 4  | 1  | 1  | 2 | 0 | 0 | 0 | 0 | 0 |
| 4933413J0 | -3.5657 | -0.5734 | 6.5835 | 0.0103 | 0.5435 | 0   | 2  | 2  | 3  | 1 | 0 | 0 | 0 | 0 | 0 |
| Kcnh5     | -3.5619 | 1.675   | 9.1686 | 0.0025 | 0.3163 | 0   | 5  | 0  | 1  | 2 | 0 | 0 | 0 | 0 | 0 |
| Gdap1l1   | -3.5596 | 4.8342  | 10.324 | 0.0013 | 0.2316 | 0   | 4  | 0  | 4  | 0 | 0 | 0 | 0 | 0 | 0 |
| Il1rl1    | -3.5596 | 0.7182  | 8.7633 | 0.0031 | 0.3382 | 0   | 0  | 3  | 5  | 0 | 0 | 0 | 0 | 0 | 0 |
| Gm31902   | -3.5594 | -0.5913 | 7.6816 | 0.0056 | 0.434  | 2   | 0  | 3  | 3  | 0 | 0 | 0 | 0 | 0 | 0 |
| Cela1     | -3.5581 | 3.2141  | 10.189 | 0.0014 | 0.2424 | 4   | 4  | 0  | 0  | 0 | 0 | 0 | 0 | 0 | 0 |
| Gm38637   | -3.5563 | -0.7983 | 6.9311 | 0.0085 | 0.5048 | 0   | 4  | 2  | 0  | 2 | 0 | 0 | 0 | 0 | 0 |
| Gm31473   | -3.5544 | -0.5435 | 4.9114 | 0.0267 | 0.7377 | 3   | 0  | 0  | 0  | 3 | 0 | 0 | 0 | 0 | 0 |
| A930016O  | -3.5506 | -0.657  | 3.8644 | 0.0493 | 0.8716 | 1   | 2  | 0  | 5  | 0 | 0 | 0 | 0 | 0 | 0 |
| Gm38760   | -3.5496 | -0.7253 | 6.7547 | 0.0094 | 0.5215 | 1   | 0  | 3  | 4  | 0 | 0 | 0 | 0 | 0 | 0 |
| LOC108168 | -3.5416 | -0.7941 | 4.5955 | 0.0321 | 0.7798 | 2   | 0  | 3  | 0  | 2 | 0 | 0 | 0 | 0 | 0 |
| Mpp4      | -3.5336 | -0.4393 | 4.5493 | 0.0329 | 0.7852 | 5   | 3  | 0  | 0  | 0 | 0 | 0 | 0 | 0 | 0 |
| Gm36243   | -3.5301 | 0.3476  | 9.819  | 0.0017 | 0.261  | 8   | 15 | 16 | 0  | 1 | 0 | 0 | 0 | 1 | 1 |
| Gm41113   | -3.5282 | -0.1565 | 6.8959 | 0.0086 | 0.5068 | 0   | 4  | 5  | 0  | 0 | 0 | 0 | 0 | 0 | 0 |
| Itgae     | -3.5217 | 0.0118  | 5.7766 | 0.0162 | 0.6285 | 0   | 4  | 0  | 0  | 3 | 0 | 0 | 0 | 0 | 0 |
| Slc26a1   | -3.5208 | 0.0972  | 6.3602 | 0.0117 | 0.5582 | 0   | 0  | 0  | 6  | 1 | 0 | 0 | 0 | 0 | 0 |
| Gm38732   | -3.5186 | 0.9412  | 8.1612 | 0.0043 | 0.3886 | 5   | 0  | 0  | 0  | 2 | 0 | 0 | 0 | 0 | 0 |
| Gm40320   | -3.5179 | -0.4671 | 5.9661 | 0.0146 | 0.6057 | 2   | 0  | 4  | 2  | 0 | 0 | 0 | 0 | 0 | 0 |
| Ano7      | -3.5163 | -0.2266 | 6.8578 | 0.0088 | 0.5121 | 0   | 1  | 5  | 1  | 1 | 0 | 0 | 0 | 0 | 0 |
| Gm41450   | -3.5115 | -0.6583 | 4.7598 | 0.0291 | 0.7563 | 3   | 0  | 4  | 1  | 0 | 0 | 0 | 0 | 0 | 0 |
| Gm10560   | -3.5085 | -0.1215 | 6.2337 | 0.0125 | 0.5758 | 1   | 0  | 1  | 0  | 4 | 0 | 0 | 0 | 0 | 0 |
| Rlbp1     | -3.5083 | 2.7119  | 18.511 | 2E-05  | 0.0276 | 37  | 2  | 2  | 0  | 1 | 1 | 0 | 1 | 0 | 1 |
| Klk14     | -3.5056 | -0.4533 | 6.4165 | 0.0113 | 0.5538 | 4   | 4  | 0  | 0  | 0 | 0 | 0 | 0 | 0 | 0 |
| Nlrp10    | -3.4969 | -0.5603 | 4.4902 | 0.0341 | 0.7976 | 7   | 0  | 0  | 0  | 0 | 0 | 0 | 0 | 0 | 0 |
| Pde6a     | -3.4926 | 0.2199  | 6.3208 | 0.0119 | 0.5634 | 50  | 0  | 10 | 0  | 0 | 1 | 3 | 0 | 0 | 1 |
| LOC105243 | -3.4852 | -0.4002 | 4.5537 | 0.0328 | 0.7852 | 4   | 4  | 0  | 0  | 0 | 0 | 0 | 0 | 0 | 0 |
| Gm32694   | -3.4833 | -0.3054 | 5.6483 | 0.0175 | 0.6381 | 0   | 0  | 7  | 0  | 1 | 0 | 0 | 0 | 0 | 0 |
| Gm40187   | -3.4815 | -0.5312 | 6.971  | 0.0083 | 0.5043 | 1   | 3  | 2  | 2  | 0 | 0 | 0 | 0 | 0 | 0 |
| Lrcol1    | -3.4739 | -0.8133 | 4.3014 | 0.0381 | 0.8131 | 3   | 0  | 0  | 4  | 0 | 0 | 0 | 0 | 0 | 0 |
| Prkag2os1 | -3.4514 | -0.542  | 4.9354 | 0.0263 | 0.7367 | 3   | 0  | 6  | 1  | 6 | 0 | 0 | 0 | 0 | 1 |
| Gdf10     | -3.4511 | 0.8003  | 8.0172 | 0.0046 | 0.4007 | 7   | 0  | 0  | 0  | 0 | 0 | 0 | 0 | 0 | 0 |
| Gm12315   | -3.4508 | -0.2127 | 4.4885 | 0.0341 | 0.7977 | 0   | 3  | 0  | 7  | 6 | 1 | 0 | 0 | 0 | 0 |
| Fam169b   | -3.4489 | -0.0817 | 9.9614 | 0.0016 | 0.2567 | 2   | 0  | 9  | 2  | 5 | 1 | 0 | 0 | 0 | 0 |
| Arhgef15  | -3.4458 | 1.4031  | 8.0898 | 0.0045 | 0.3937 | 6   | 0  | 0  | 1  | 0 | 0 | 0 | 0 | 0 | 0 |

|           |         |         |        |        |        |    |    |    |    |   |   |   |   |   |   |
|-----------|---------|---------|--------|--------|--------|----|----|----|----|---|---|---|---|---|---|
| 4930447F2 | -3.444  | -0.7822 | 4.3619 | 0.0368 | 0.8127 | 0  | 6  | 3  | 0  | 0 | 0 | 0 | 0 | 0 | 0 |
| Lrrc23    | -3.443  | -0.1483 | 5.5599 | 0.0184 | 0.6548 | 0  | 0  | 0  | 0  | 5 | 0 | 0 | 0 | 0 | 0 |
| Hist1h2ai | -3.4341 | -0.6882 | 4.4036 | 0.0359 | 0.811  | 4  | 1  | 0  | 2  | 0 | 0 | 0 | 0 | 0 | 0 |
| Gm38609   | -3.4332 | 0.414   | 12.094 | 0.0005 | 0.1491 | 4  | 11 | 17 | 3  | 0 | 1 | 0 | 1 | 0 | 0 |
| Cngb1     | -3.4145 | 0.0965  | 9.5518 | 0.002  | 0.2785 | 12 | 2  | 2  | 2  | 1 | 0 | 0 | 0 | 1 | 0 |
| Gm38805   | -3.4134 | -0.5101 | 5.2217 | 0.0223 | 0.6995 | 0  | 4  | 1  | 0  | 2 | 0 | 0 | 0 | 0 | 0 |
| Ptgfr     | -3.4071 | 2.9946  | 8.8879 | 0.0029 | 0.3278 | 7  | 0  | 0  | 0  | 0 | 0 | 0 | 0 | 0 | 0 |
| LOC102637 | -3.4027 | -0.6737 | 5.4514 | 0.0196 | 0.6713 | 0  | 5  | 0  | 0  | 2 | 0 | 0 | 0 | 0 | 0 |
| Zfp853    | -3.3998 | 0.039   | 6.219  | 0.0126 | 0.5792 | 4  | 0  | 0  | 0  | 2 | 0 | 0 | 0 | 0 | 0 |
| LOC108167 | -3.3996 | -0.8892 | 4.8829 | 0.0271 | 0.7422 | 0  | 0  | 1  | 3  | 2 | 0 | 0 | 0 | 0 | 0 |
| Plppr4    | -3.3981 | 2.4114  | 9.0047 | 0.0027 | 0.3197 | 7  | 0  | 0  | 0  | 0 | 0 | 0 | 0 | 0 | 0 |
| Krt79     | -3.3978 | -0.3757 | 7.1725 | 0.0074 | 0.4825 | 4  | 2  | 0  | 1  | 0 | 0 | 0 | 0 | 0 | 0 |
| Jchain    | -3.3906 | -0.3887 | 5.2137 | 0.0224 | 0.6995 | 0  | 6  | 0  | 2  | 0 | 0 | 0 | 0 | 0 | 0 |
| Adam23    | -3.3885 | 6.7786  | 9.1049 | 0.0025 | 0.3165 | 0  | 1  | 3  | 0  | 3 | 0 | 0 | 0 | 0 | 0 |
| Nrcam     | -3.3869 | 6.3202  | 9.0837 | 0.0026 | 0.3165 | 4  | 1  | 2  | 0  | 0 | 0 | 0 | 0 | 0 | 0 |
| Chst8     | -3.3838 | 3.9813  | 9.0212 | 0.0027 | 0.3197 | 0  | 0  | 6  | 0  | 1 | 0 | 0 | 0 | 0 | 0 |
| Gm31776   | -3.3829 | -0.5616 | 4.7697 | 0.029  | 0.7557 | 0  | 0  | 2  | 5  | 0 | 0 | 0 | 0 | 0 | 0 |
| Tusc5     | -3.3821 | 7.8203  | 9.0459 | 0.0026 | 0.3188 | 0  | 0  | 7  | 0  | 0 | 0 | 0 | 0 | 0 | 0 |
| Frmdbos   | -3.3763 | -0.3842 | 5.6152 | 0.0178 | 0.6444 | 0  | 5  | 2  | 1  | 0 | 0 | 0 | 0 | 0 | 0 |
| Gm34591   | -3.3755 | 0.7937  | 8.3085 | 0.0039 | 0.3756 | 1  | 3  | 0  | 3  | 0 | 0 | 0 | 0 | 0 | 0 |
| Pamr1     | -3.3663 | 0.2442  | 6.9163 | 0.0085 | 0.5048 | 4  | 3  | 0  | 0  | 0 | 0 | 0 | 0 | 0 | 0 |
| Gm31613   | -3.3641 | -0.7715 | 4.2089 | 0.0402 | 0.8291 | 2  | 0  | 0  | 0  | 3 | 0 | 0 | 0 | 0 | 0 |
| LOC105246 | -3.3641 | 0.4784  | 12.674 | 0.0004 | 0.1235 | 6  | 1  | 17 | 15 | 2 | 1 | 0 | 1 | 0 | 1 |
| 1700092M  | -3.3621 | -0.726  | 4.1069 | 0.0427 | 0.8447 | 0  | 2  | 0  | 5  | 0 | 0 | 0 | 0 | 0 | 0 |
| Cd83      | -3.3494 | 0.6412  | 8.084  | 0.0045 | 0.3937 | 2  | 3  | 2  | 0  | 0 | 0 | 0 | 0 | 0 | 0 |
| 4930511M  | -3.348  | -0.1655 | 6.1698 | 0.013  | 0.5858 | 0  | 2  | 1  | 4  | 0 | 0 | 0 | 0 | 0 | 0 |
| Carmn     | -3.3477 | -0.1042 | 4.4502 | 0.0349 | 0.8042 | 0  | 0  | 8  | 0  | 0 | 0 | 0 | 0 | 0 | 0 |
| Gm7967    | -3.3393 | 0.4357  | 7.5153 | 0.0061 | 0.4459 | 0  | 4  | 0  | 3  | 0 | 0 | 0 | 0 | 0 | 0 |
| Ccdc146   | -3.3302 | 0.1235  | 6.7515 | 0.0094 | 0.5216 | 3  | 4  | 0  | 0  | 0 | 0 | 0 | 0 | 0 | 0 |
| Gm16897   | -3.3291 | -0.1626 | 7.0467 | 0.0079 | 0.4954 | 0  | 3  | 3  | 0  | 1 | 0 | 0 | 0 | 0 | 0 |
| Notch4    | -3.3245 | 0.9188  | 11.007 | 0.0009 | 0.1888 | 3  | 9  | 0  | 5  | 1 | 0 | 0 | 0 | 0 | 1 |
| Gm32702   | -3.3244 | -0.2996 | 5.3863 | 0.0203 | 0.6824 | 2  | 0  | 7  | 9  | 0 | 0 | 0 | 0 | 0 | 1 |
| Has2      | -3.3226 | 0.6101  | 8.2287 | 0.0041 | 0.3832 | 17 | 0  | 2  | 0  | 5 | 0 | 0 | 2 | 0 | 0 |
| LOC105242 | -3.3204 | -0.643  | 4.0858 | 0.0432 | 0.85   | 0  | 7  | 0  | 1  | 0 | 0 | 0 | 0 | 0 | 0 |
| Gm31344   | -3.3095 | -0.5403 | 5.4994 | 0.019  | 0.6651 | 3  | 0  | 1  | 1  | 1 | 0 | 0 | 0 | 0 | 0 |
| LOC108168 | -3.3082 | -0.5606 | 5.7021 | 0.0169 | 0.6337 | 5  | 2  | 2  | 7  | 1 | 1 | 0 | 0 | 0 | 0 |
| Rapsn     | -3.3007 | 1.4526  | 11.29  | 0.0008 | 0.1801 | 6  | 5  | 5  | 2  | 0 | 1 | 0 | 0 | 0 | 0 |
| Gm30769   | -3.3    | -0.2668 | 5.5905 | 0.0181 | 0.6487 | 2  | 0  | 5  | 0  | 0 | 0 | 0 | 0 | 0 | 0 |
| Gm33260   | -3.2972 | -0.3171 | 4.9382 | 0.0263 | 0.736  | 3  | 4  | 0  | 0  | 0 | 0 | 0 | 0 | 0 | 0 |
| Dnajc5b   | -3.2949 | -0.3186 | 5.3391 | 0.0209 | 0.6908 | 2  | 0  | 5  | 0  | 0 | 0 | 0 | 0 | 0 | 0 |
| Gm41689   | -3.2924 | -0.2466 | 4.5354 | 0.0332 | 0.7874 | 6  | 0  | 0  | 0  | 0 | 0 | 0 | 0 | 0 | 0 |
| Mospd4    | -3.2817 | -0.5301 | 4.6378 | 0.0313 | 0.7726 | 2  | 0  | 5  | 0  | 0 | 0 | 0 | 0 | 0 | 0 |
| Alox8     | -3.2813 | -0.3851 | 6.8284 | 0.009  | 0.5138 | 1  | 4  | 2  | 0  | 0 | 0 | 0 | 0 | 0 | 0 |
| Rxfrp1    | -3.2588 | -0.3794 | 4.8274 | 0.028  | 0.7488 | 0  | 0  | 1  | 1  | 3 | 0 | 0 | 0 | 0 | 0 |
| Gm40007   | -3.2555 | -0.7058 | 4.0992 | 0.0429 | 0.8462 | 0  | 0  | 0  | 6  | 0 | 0 | 0 | 0 | 0 | 0 |
| Gm10364   | -3.2552 | -0.5788 | 5.4453 | 0.0196 | 0.6729 | 0  | 0  | 6  | 1  | 0 | 0 | 0 | 0 | 0 | 0 |
| Igsf1     | -3.25   | 0.0693  | 5.7276 | 0.0167 | 0.6337 | 0  | 0  | 0  | 6  | 0 | 0 | 0 | 0 | 0 | 0 |
| Spag17    | -3.2481 | -0.5741 | 5.6393 | 0.0176 | 0.6392 | 0  | 1  | 3  | 0  | 2 | 0 | 0 | 0 | 0 | 0 |
| Gm30340   | -3.2451 | -0.5268 | 4.4546 | 0.0348 | 0.8037 | 3  | 0  | 0  | 0  | 2 | 0 | 0 | 0 | 0 | 0 |
| Gm10584   | -3.2418 | -0.4251 | 5.0935 | 0.024  | 0.7183 | 0  | 5  | 0  | 2  | 0 | 0 | 0 | 0 | 0 | 0 |
| Prss55    | -3.2379 | -0.7613 | 4.6275 | 0.0315 | 0.7737 | 0  | 4  | 1  | 2  | 0 | 0 | 0 | 0 | 0 | 0 |
| LOC108168 | -3.2374 | 0.2864  | 12.145 | 0.0005 | 0.1486 | 10 | 3  | 18 | 5  | 2 | 0 | 0 | 0 | 0 | 3 |
| Krtap2-4  | -3.2263 | -0.9264 | 3.9796 | 0.0461 | 0.8611 | 0  | 0  | 0  | 0  | 4 | 0 | 0 | 0 | 0 | 0 |
| LOC108168 | -3.2263 | -0.9264 | 3.9796 | 0.0461 | 0.8611 | 0  | 0  | 0  | 0  | 4 | 0 | 0 | 0 | 0 | 0 |
| Npr1      | -3.218  | 0.6516  | 7.5007 | 0.0062 | 0.4459 | 14 | 0  | 0  | 1  | 0 | 0 | 0 | 1 | 0 | 0 |
| Prr32     | -3.2169 | -0.5414 | 5.4565 | 0.0195 | 0.6705 | 0  | 0  | 1  | 5  | 0 | 0 | 0 | 0 | 0 | 0 |
| Slc25a21  | -3.2159 | -0.373  | 5.2187 | 0.0223 | 0.6995 | 0  | 0  | 7  | 0  | 0 | 0 | 0 | 0 | 0 | 0 |
| Olr1      | -3.2157 | -0.6918 | 4.0242 | 0.0449 | 0.8574 | 0  | 5  | 0  | 2  | 0 | 0 | 0 | 0 | 0 | 0 |
| Gm32461   | -3.2155 | -0.7977 | 3.8908 | 0.0486 | 0.8678 | 0  | 0  | 6  | 1  | 0 | 0 | 0 | 0 | 0 | 0 |
| Gm39664   | -3.214  | -0.4205 | 4.2577 | 0.0391 | 0.8215 | 0  | 0  | 1  | 5  | 0 | 0 | 0 | 0 | 0 | 0 |
| Scarna3b  | -3.2133 | -0.741  | 4.0568 | 0.044  | 0.8533 | 0  | 0  | 1  | 5  | 0 | 0 | 0 | 0 | 0 | 0 |
| Ptprz1    | -3.2007 | 5.3368  | 14.359 | 0.0002 | 0.0808 | 3  | 1  | 4  | 7  | 1 | 0 | 0 | 0 | 0 | 1 |

|           |         |         |        |        |        |    |    |   |    |   |   |   |   |   |   |
|-----------|---------|---------|--------|--------|--------|----|----|---|----|---|---|---|---|---|---|
| Sema3g    | -3.1996 | 3.6733  | 7.7067 | 0.0055 | 0.4317 | 6  | 0  | 0 | 0  | 0 | 0 | 0 | 0 | 0 | 0 |
| Gm33319   | -3.1992 | -0.6078 | 5.3431 | 0.0208 | 0.6905 | 6  | 3  | 4 | 0  | 0 | 0 | 0 | 0 | 0 | 0 |
| Nanos3    | -3.1963 | 0.1611  | 6.4297 | 0.0112 | 0.5523 | 2  | 0  | 2 | 2  | 0 | 0 | 0 | 0 | 0 | 0 |
| Gm38822   | -3.1954 | -0.639  | 5.6495 | 0.0175 | 0.6381 | 0  | 3  | 0 | 2  | 1 | 0 | 0 | 0 | 0 | 0 |
| A530020G  | -3.1935 | -0.8316 | 3.8533 | 0.0496 | 0.8726 | 0  | 1  | 0 | 2  | 2 | 0 | 0 | 0 | 0 | 0 |
| Calb2     | -3.1925 | 4.7797  | 7.7208 | 0.0055 | 0.4316 | 5  | 1  | 0 | 0  | 0 | 0 | 0 | 0 | 0 | 0 |
| Prss12    | -3.1889 | 4.8445  | 7.759  | 0.0053 | 0.4269 | 4  | 0  | 2 | 0  | 0 | 0 | 0 | 0 | 0 | 0 |
| Rims4     | -3.1883 | 3.411   | 7.7096 | 0.0055 | 0.4317 | 4  | 2  | 0 | 0  | 0 | 0 | 0 | 0 | 0 | 0 |
| Cmtm5     | -3.1877 | 5.565   | 7.7739 | 0.0053 | 0.4266 | 4  | 2  | 0 | 0  | 0 | 0 | 0 | 0 | 0 | 0 |
| Cadps     | -3.1862 | 6.9073  | 7.7824 | 0.0053 | 0.4256 | 3  | 3  | 0 | 0  | 0 | 0 | 0 | 0 | 0 | 0 |
| Gm40279   | -3.1805 | -0.6723 | 4.3077 | 0.0379 | 0.8131 | 4  | 2  | 0 | 0  | 0 | 0 | 0 | 0 | 0 | 0 |
| Gm32605   | -3.1759 | 0.4925  | 6.2147 | 0.0127 | 0.5799 | 0  | 2  | 0 | 4  | 0 | 0 | 0 | 0 | 0 | 0 |
| Gm36904   | -3.1707 | -0.4394 | 4.0465 | 0.0443 | 0.8549 | 0  | 0  | 2 | 4  | 0 | 0 | 0 | 0 | 0 | 0 |
| Galnt16   | -3.1695 | 3.4402  | 7.6105 | 0.0058 | 0.4373 | 0  | 6  | 0 | 0  | 0 | 0 | 0 | 0 | 0 | 0 |
| Syt6      | -3.1644 | 4.4738  | 13.66  | 0.0002 | 0.095  | 0  | 15 | 0 | 0  | 1 | 0 | 0 | 0 | 0 | 1 |
| Gm30034   | -3.1606 | -0.7437 | 4.7985 | 0.0285 | 0.7527 | 0  | 3  | 1 | 1  | 1 | 0 | 0 | 0 | 0 | 0 |
| Nr1h5     | -3.1567 | -0.8924 | 6.8906 | 0.0087 | 0.5068 | 1  | 1  | 3 | 1  | 0 | 0 | 0 | 0 | 0 | 0 |
| Gm35655   | -3.1553 | -0.1568 | 8.4675 | 0.0036 | 0.3649 | 3  | 8  | 3 | 11 | 1 | 1 | 0 | 1 | 0 | 0 |
| Gm13986   | -3.1516 | -0.2687 | 5.0316 | 0.0249 | 0.7219 | 8  | 4  | 2 | 4  | 0 | 0 | 0 | 0 | 1 | 0 |
| Gm29797   | -3.1514 | -0.1332 | 5.439  | 0.0197 | 0.6745 | 0  | 0  | 5 | 0  | 1 | 0 | 0 | 0 | 0 | 0 |
| Ube2d2b   | -3.1443 | -0.2908 | 6.797  | 0.0091 | 0.5176 | 3  | 9  | 2 | 0  | 2 | 0 | 0 | 1 | 0 | 0 |
| Hist1h2af | -3.1434 | -0.7251 | 7.0269 | 0.008  | 0.4989 | 1  | 3  | 2 | 0  | 0 | 0 | 0 | 0 | 0 | 0 |
| Gm33269   | -3.143  | 0.0239  | 6.1172 | 0.0134 | 0.5946 | 2  | 0  | 4 | 0  | 0 | 0 | 0 | 0 | 0 | 0 |
| Gm6559    | -3.1405 | -0.9087 | 4.3924 | 0.0361 | 0.811  | 3  | 0  | 0 | 1  | 1 | 0 | 0 | 0 | 0 | 0 |
| Gm32650   | -3.1376 | -0.6572 | 4.6755 | 0.0306 | 0.7712 | 0  | 0  | 3 | 3  | 0 | 0 | 0 | 0 | 0 | 0 |
| Gypa      | -3.1363 | -0.1076 | 6.5224 | 0.0107 | 0.546  | 1  | 3  | 1 | 1  | 0 | 0 | 0 | 0 | 0 | 0 |
| Col19a1   | -3.1353 | 0.8483  | 6.5513 | 0.0105 | 0.5454 | 2  | 4  | 0 | 0  | 0 | 0 | 0 | 0 | 0 | 0 |
| Gm30339   | -3.1329 | -0.1851 | 8.3489 | 0.0039 | 0.3742 | 2  | 1  | 9 | 5  | 0 | 0 | 0 | 0 | 1 | 0 |
| Edn3      | -3.1231 | 1.4256  | 13.495 | 0.0002 | 0.1024 | 11 | 11 | 0 | 0  | 3 | 0 | 0 | 0 | 1 | 1 |
| Rgcc      | -3.1201 | 4.2994  | 13.326 | 0.0003 | 0.107  | 9  | 0  | 0 | 5  | 1 | 0 | 0 | 0 | 0 | 1 |
| Gm32688   | -3.1158 | -0.4975 | 4.9108 | 0.0267 | 0.7377 | 2  | 0  | 4 | 0  | 0 | 0 | 0 | 0 | 0 | 0 |
| Gm40768   | -3.1059 | -0.4369 | 4.343  | 0.0372 | 0.8131 | 0  | 3  | 0 | 3  | 0 | 0 | 0 | 0 | 0 | 0 |
| Nr4a3     | -3.1051 | -0.198  | 5.2748 | 0.0216 | 0.6958 | 4  | 0  | 0 | 0  | 1 | 0 | 0 | 0 | 0 | 0 |
| Gm32113   | -3.104  | 0.3539  | 6.3626 | 0.0117 | 0.5582 | 0  | 0  | 6 | 0  | 0 | 0 | 0 | 0 | 0 | 0 |
| C920021L1 | -3.0942 | -0.0736 | 4.4427 | 0.0351 | 0.8062 | 0  | 0  | 4 | 2  | 0 | 0 | 0 | 0 | 0 | 0 |
| Gm39671   | -3.0905 | -0.8162 | 4.272  | 0.0387 | 0.8196 | 0  | 0  | 4 | 2  | 0 | 0 | 0 | 0 | 0 | 0 |
| LOC108168 | -3.0903 | 0.1731  | 8.6208 | 0.0033 | 0.3486 | 1  | 4  | 7 | 4  | 0 | 1 | 0 | 0 | 0 | 0 |
| Gm36696   | -3.0813 | -0.6909 | 4.9148 | 0.0266 | 0.7377 | 0  | 3  | 1 | 2  | 0 | 0 | 0 | 0 | 0 | 0 |
| LOC108168 | -3.0804 | -0.3452 | 4.7855 | 0.0287 | 0.7541 | 2  | 4  | 0 | 0  | 0 | 0 | 0 | 0 | 0 | 0 |
| Ecm2      | -3.0798 | 2.6013  | 16.896 | 4E-05  | 0.0438 | 22 | 6  | 1 | 3  | 1 | 0 | 1 | 0 | 2 | 0 |
| Plcxd1    | -3.0734 | -0.455  | 6.3669 | 0.0116 | 0.5577 | 3  | 5  | 4 | 1  | 2 | 1 | 0 | 0 | 0 | 0 |
| Far2      | -3.0602 | 2.023   | 10.965 | 0.0009 | 0.192  | 5  | 0  | 3 | 4  | 2 | 0 | 0 | 1 | 0 | 0 |
| Chrm3     | -3.0571 | 1.8977  | 12.827 | 0.0003 | 0.1168 | 22 | 0  | 5 | 0  | 3 | 0 | 0 | 0 | 0 | 3 |
| Spred3    | -3.0547 | 1.9448  | 10.426 | 0.0012 | 0.2316 | 3  | 9  | 0 | 3  | 0 | 0 | 0 | 0 | 0 | 1 |
| 4930578C1 | -3.0458 | -0.1522 | 4.8356 | 0.0279 | 0.7488 | 5  | 0  | 0 | 0  | 0 | 0 | 0 | 0 | 0 | 0 |
| Gm29891   | -3.0431 | -0.8698 | 3.9389 | 0.0472 | 0.8678 | 3  | 0  | 0 | 2  | 0 | 0 | 0 | 0 | 0 | 0 |
| Gm10109   | -3.0419 | 0.0395  | 6.0821 | 0.0137 | 0.6008 | 2  | 0  | 1 | 0  | 2 | 0 | 0 | 0 | 0 | 0 |
| Ptafr     | -3.0405 | 0.3101  | 5.7591 | 0.0164 | 0.6285 | 0  | 6  | 0 | 0  | 0 | 0 | 0 | 0 | 0 | 0 |
| Fam83e    | -3.0368 | -0.3394 | 6.0357 | 0.014  | 0.604  | 14 | 6  | 4 | 9  | 0 | 2 | 0 | 0 | 0 | 1 |
| 20103200C | -3.0356 | -0.498  | 4.0093 | 0.0452 | 0.8577 | 2  | 0  | 0 | 3  | 0 | 0 | 0 | 0 | 0 | 0 |
| Onecut3   | -3.0219 | 1.2284  | 5.6568 | 0.0174 | 0.6381 | 5  | 0  | 0 | 0  | 0 | 0 | 0 | 0 | 0 | 0 |
| 4930557K0 | -3.017  | -0.5944 | 3.921  | 0.0477 | 0.8678 | 0  | 9  | 0 | 5  | 1 | 0 | 0 | 0 | 0 | 1 |
| Csrnp3    | -3.0124 | 5.1642  | 12.1   | 0.0005 | 0.1491 | 2  | 0  | 6 | 6  | 0 | 0 | 0 | 0 | 0 | 1 |
| Zdhhc22   | -3.0109 | 4.505   | 11.89  | 0.0006 | 0.1538 | 7  | 4  | 0 | 3  | 0 | 0 | 0 | 0 | 1 | 0 |
| B3galnt1  | -3.0094 | 3.8125  | 11.244 | 0.0008 | 0.1801 | 7  | 0  | 7 | 0  | 0 | 0 | 0 | 1 | 0 | 0 |
| Cyp4b1    | -3.009  | -0.2817 | 4.0827 | 0.0433 | 0.85   | 4  | 0  | 0 | 0  | 6 | 0 | 0 | 0 | 0 | 1 |
| Gm40117   | -3.0042 | -0.5319 | 4.1095 | 0.0426 | 0.8447 | 0  | 0  | 6 | 0  | 0 | 0 | 0 | 0 | 0 | 0 |
| Fhad1os2  | -3.0032 | -0.7088 | 4.013  | 0.0451 | 0.8577 | 1  | 5  | 0 | 0  | 0 | 0 | 0 | 0 | 0 | 0 |
| Acr       | -3.0015 | 0.2387  | 5.6666 | 0.0173 | 0.6381 | 0  | 0  | 0 | 5  | 0 | 0 | 0 | 0 | 0 | 0 |
| Gm39988   | -3      | -0.2896 | 3.9956 | 0.0456 | 0.8597 | 0  | 0  | 6 | 0  | 0 | 0 | 0 | 0 | 0 | 0 |
| Zfp42     | -2.9977 | -0.6743 | 4.3843 | 0.0363 | 0.811  | 0  | 2  | 4 | 0  | 0 | 0 | 0 | 0 | 0 | 0 |
| 2810407A1 | -2.9966 | -0.7765 | 4.1883 | 0.0407 | 0.833  | 3  | 0  | 1 | 1  | 0 | 0 | 0 | 0 | 0 | 0 |

|           |         |         |        |        |        |     |    |    |    |    |    |   |   |   |   |
|-----------|---------|---------|--------|--------|--------|-----|----|----|----|----|----|---|---|---|---|
| Nlrc5     | -2.9964 | 0.0031  | 3.8946 | 0.0484 | 0.8678 | 0   | 0  | 6  | 0  | 0  | 0  | 0 | 0 | 0 | 0 |
| Gm30927   | -2.9951 | -0.6564 | 4.106  | 0.0427 | 0.8447 | 0   | 1  | 5  | 0  | 0  | 0  | 0 | 0 | 0 | 0 |
| Dnah17    | -2.993  | -0.324  | 4.4575 | 0.0347 | 0.8034 | 4   | 1  | 0  | 0  | 0  | 0  | 0 | 0 | 0 | 0 |
| Dynlrb2   | -2.9926 | -0.3406 | 4.591  | 0.0321 | 0.7798 | 4   | 1  | 0  | 0  | 0  | 0  | 0 | 0 | 0 | 0 |
| BC048609  | -2.9925 | -0.1411 | 6.4152 | 0.0113 | 0.5538 | 6   | 6  | 1  | 0  | 1  | 0  | 0 | 0 | 0 | 1 |
| Txlnb     | -2.9919 | 0.0572  | 5.5373 | 0.0186 | 0.6585 | 2   | 2  | 0  | 0  | 1  | 0  | 0 | 0 | 0 | 0 |
| Gm5486    | -2.9885 | 0.1135  | 5.6935 | 0.017  | 0.6337 | 4   | 0  | 1  | 0  | 0  | 0  | 0 | 0 | 0 | 0 |
| 4632427E1 | -2.9865 | -0.5432 | 4.6447 | 0.0311 | 0.7726 | 3   | 1  | 0  | 1  | 0  | 0  | 0 | 0 | 0 | 0 |
| Gm40434   | -2.9793 | -0.8359 | 4.1545 | 0.0415 | 0.8377 | 0   | 3  | 3  | 0  | 0  | 0  | 0 | 0 | 0 | 0 |
| Hoxd9     | -2.9779 | -0.1373 | 4.6092 | 0.0318 | 0.7776 | 0   | 0  | 1  | 4  | 0  | 0  | 0 | 0 | 0 | 0 |
| Gm35321   | -2.9775 | 0.5117  | 5.9132 | 0.015  | 0.6123 | 4   | 1  | 0  | 0  | 0  | 0  | 0 | 0 | 0 | 0 |
| Gm33729   | -2.9742 | 2.1802  | 19.055 | 1E-05  | 0.0254 | 4   | 12 | 17 | 9  | 0  | 0  | 2 | 0 | 1 | 1 |
| B230344G1 | -2.9732 | -0.5603 | 4.5606 | 0.0327 | 0.7852 | 0   | 6  | 0  | 0  | 0  | 0  | 0 | 0 | 0 | 0 |
| Gm36044   | -2.9672 | -0.8509 | 4.2602 | 0.039  | 0.8215 | 0   | 1  | 0  | 4  | 0  | 0  | 0 | 0 | 0 | 0 |
| Gnat1     | -2.9666 | 1.1075  | 6.6622 | 0.0098 | 0.5336 | 145 | 11 | 10 | 0  | 3  | 4  | 0 | 2 | 4 | 8 |
| Prokr1    | -2.9646 | 4.1685  | 6.4513 | 0.0111 | 0.5501 | 5   | 0  | 0  | 0  | 0  | 0  | 0 | 0 | 0 | 0 |
| Hspa12b   | -2.9607 | 0.68    | 5.8392 | 0.0157 | 0.6238 | 3   | 0  | 2  | 0  | 0  | 0  | 0 | 0 | 0 | 0 |
| Kcnq2     | -2.9606 | 4.9614  | 6.4847 | 0.0109 | 0.5486 | 5   | 0  | 0  | 0  | 0  | 0  | 0 | 0 | 0 | 0 |
| Trpm2     | -2.9598 | 3.5699  | 6.4262 | 0.0112 | 0.5527 | 1   | 0  | 1  | 3  | 0  | 0  | 0 | 0 | 0 | 0 |
| 4933424GC | -2.9578 | -0.1214 | 6.9155 | 0.0085 | 0.5048 | 1   | 5  | 4  | 0  | 3  | 0  | 1 | 0 | 0 | 0 |
| A230070EC | -2.9578 | 3.2827  | 6.3535 | 0.0117 | 0.5582 | 3   | 0  | 2  | 0  | 0  | 0  | 0 | 0 | 0 | 0 |
| Zmat4     | -2.9541 | 3.3861  | 6.4494 | 0.0111 | 0.5501 | 0   | 0  | 4  | 0  | 1  | 0  | 0 | 0 | 0 | 0 |
| Gpr37     | -2.9533 | 3.0695  | 6.4364 | 0.0112 | 0.5522 | 1   | 0  | 3  | 1  | 0  | 0  | 0 | 0 | 0 | 0 |
| Sorcs1    | -2.9522 | 4.9391  | 6.4768 | 0.0109 | 0.5486 | 1   | 3  | 1  | 0  | 0  | 0  | 0 | 0 | 0 | 0 |
| Gm42278   | -2.9504 | -0.3771 | 4.929  | 0.0264 | 0.7377 | 1   | 0  | 6  | 4  | 3  | 0  | 0 | 0 | 1 | 0 |
| Tmem88b   | -2.9472 | 3.5431  | 6.3776 | 0.0116 | 0.5577 | 1   | 1  | 3  | 0  | 0  | 0  | 0 | 0 | 0 | 0 |
| Selplg    | -2.9422 | 0.4912  | 5.7462 | 0.0165 | 0.6311 | 0   | 2  | 0  | 3  | 0  | 0  | 0 | 0 | 0 | 0 |
| LOC102633 | -2.9417 | 1.7732  | 6.2475 | 0.0124 | 0.5751 | 1   | 0  | 4  | 0  | 0  | 0  | 0 | 0 | 0 | 0 |
| Gm3764    | -2.9416 | 0.5053  | 5.2854 | 0.0215 | 0.6958 | 2   | 2  | 0  | 1  | 0  | 0  | 0 | 0 | 0 | 0 |
| Gm39342   | -2.9322 | -0.2327 | 5.2148 | 0.0224 | 0.6995 | 0   | 6  | 0  | 5  | 2  | 0  | 0 | 0 | 0 | 1 |
| Gm31984   | -2.9313 | -0.3295 | 5.6347 | 0.0176 | 0.6392 | 0   | 8  | 4  | 0  | 3  | 0  | 0 | 0 | 1 | 0 |
| Abhd16b   | -2.9307 | -0.5186 | 4.5051 | 0.0338 | 0.7954 | 7   | 2  | 10 | 0  | 4  | 0  | 0 | 1 | 1 | 0 |
| Grid2     | -2.9305 | -0.1181 | 4.8333 | 0.0279 | 0.7488 | 1   | 2  | 0  | 2  | 0  | 0  | 0 | 0 | 0 | 0 |
| LOC108168 | -2.9273 | 0.6669  | 7.3497 | 0.0067 | 0.4632 | 0   | 5  | 7  | 0  | 2  | 1  | 0 | 0 | 0 | 0 |
| 4930444A1 | -2.925  | -0.672  | 4.9625 | 0.0259 | 0.7335 | 0   | 2  | 2  | 0  | 1  | 0  | 0 | 0 | 0 | 0 |
| Appbp2os  | -2.9249 | -0.4217 | 4.9731 | 0.0257 | 0.7331 | 3   | 5  | 0  | 4  | 1  | 0  | 0 | 1 | 0 | 0 |
| Dok7      | -2.919  | 2.602   | 6.1407 | 0.0132 | 0.5897 | 0   | 5  | 0  | 0  | 0  | 0  | 0 | 0 | 0 | 0 |
| Il25      | -2.9167 | 0.8531  | 5.9812 | 0.0145 | 0.6056 | 0   | 0  | 5  | 0  | 0  | 0  | 0 | 0 | 0 | 0 |
| Gm10406   | -2.9109 | -0.6557 | 4.0822 | 0.0433 | 0.85   | 0   | 3  | 1  | 0  | 1  | 0  | 0 | 0 | 0 | 0 |
| Zfp641    | -2.9076 | 1.8152  | 5.928  | 0.0149 | 0.6085 | 0   | 2  | 3  | 0  | 0  | 0  | 0 | 0 | 0 | 0 |
| Hbb-bt    | -2.9062 | 7.3405  | 18.2   | 2E-05  | 0.0298 | 145 | 27 | 2  | 4  | 16 | 14 | 0 | 5 | 2 | 3 |
| Apba1     | -2.9014 | 7.012   | 16.411 | 5E-05  | 0.0459 | 9   | 0  | 10 | 1  | 1  | 0  | 1 | 0 | 0 | 1 |
| Pax1      | -2.9012 | -0.6404 | 4.0863 | 0.0432 | 0.85   | 2   | 0  | 3  | 0  | 0  | 0  | 0 | 0 | 0 | 0 |
| Gm35164   | -2.898  | -0.852  | 3.9236 | 0.0476 | 0.8678 | 2   | 0  | 3  | 0  | 0  | 0  | 0 | 0 | 0 | 0 |
| Gm14304   | -2.8964 | -0.3671 | 9.1931 | 0.0024 | 0.3137 | 2   | 3  | 5  | 0  | 3  | 0  | 0 | 0 | 1 | 0 |
| Snord35a  | -2.8926 | -0.8517 | 4.1292 | 0.0421 | 0.8429 | 2   | 1  | 2  | 0  | 0  | 0  | 0 | 0 | 0 | 0 |
| Lor       | -2.8826 | -0.1913 | 4.11   | 0.0426 | 0.8447 | 2   | 2  | 1  | 0  | 0  | 0  | 0 | 0 | 0 | 0 |
| 1700028E1 | -2.8708 | 0.022   | 4.7799 | 0.0288 | 0.7541 | 0   | 5  | 0  | 9  | 9  | 0  | 0 | 0 | 0 | 3 |
| Gm9801    | -2.8677 | 0.7514  | 5.2163 | 0.0224 | 0.6995 | 0   | 0  | 5  | 0  | 0  | 0  | 0 | 0 | 0 | 0 |
| Ccl5      | -2.8588 | 0.1474  | 5.4378 | 0.0197 | 0.6745 | 0   | 5  | 0  | 0  | 0  | 0  | 0 | 0 | 0 | 0 |
| Gm31152   | -2.8548 | -0.4401 | 4.7047 | 0.0301 | 0.7694 | 0   | 2  | 2  | 1  | 0  | 0  | 0 | 0 | 0 | 0 |
| Tpsab1    | -2.8525 | -0.0039 | 4.7194 | 0.0298 | 0.7675 | 0   | 0  | 0  | 2  | 2  | 0  | 0 | 0 | 0 | 0 |
| Adamts4   | -2.8517 | 1.3899  | 5.3483 | 0.0207 | 0.6897 | 0   | 5  | 0  | 0  | 0  | 0  | 0 | 0 | 0 | 0 |
| Myoc      | -2.8423 | 2.7204  | 10.622 | 0.0011 | 0.2185 | 70  | 3  | 1  | 0  | 5  | 7  | 0 | 2 | 1 | 0 |
| Hrh1      | -2.8423 | 0.429   | 4.7794 | 0.0288 | 0.7541 | 0   | 0  | 5  | 0  | 0  | 0  | 0 | 0 | 0 | 0 |
| Bpifb1    | -2.8265 | 0.4573  | 4.8805 | 0.0272 | 0.7422 | 2   | 0  | 0  | 0  | 2  | 0  | 0 | 0 | 0 | 0 |
| Gm31954   | -2.8263 | -0.3839 | 5.7174 | 0.0168 | 0.6337 | 0   | 1  | 5  | 14 | 5  | 1  | 0 | 0 | 0 | 2 |
| 4930538K1 | -2.8207 | -0.0698 | 4.3801 | 0.0364 | 0.811  | 0   | 0  | 5  | 0  | 0  | 0  | 0 | 0 | 0 | 0 |
| Gm34414   | -2.8173 | 0.9546  | 9.4547 | 0.0021 | 0.2865 | 2   | 0  | 4  | 3  | 3  | 0  | 0 | 0 | 1 | 0 |
| Gm26536   | -2.8139 | -0.3068 | 4.7594 | 0.0291 | 0.7563 | 0   | 4  | 1  | 0  | 0  | 0  | 0 | 0 | 0 | 0 |
| Rgs22     | -2.813  | -0.2242 | 4.2298 | 0.0397 | 0.8236 | 0   | 0  | 5  | 0  | 0  | 0  | 0 | 0 | 0 | 0 |
| Gm40706   | -2.8123 | -0.4664 | 4.1901 | 0.0407 | 0.8329 | 0   | 1  | 1  | 0  | 2  | 0  | 0 | 0 | 0 | 0 |

|                  |         |         |        |        |        |     |    |    |    |    |    |    |    |   |    |
|------------------|---------|---------|--------|--------|--------|-----|----|----|----|----|----|----|----|---|----|
| <b>Pcdhb10</b>   | -2.8076 | -0.0939 | 4.6656 | 0.0308 | 0.772  | 0   | 4  | 1  | 0  | 0  | 0  | 0  | 0  | 0 | 0  |
| <b>Casq2</b>     | -2.8074 | 1.0297  | 5.1895 | 0.0227 | 0.7048 | 0   | 0  | 0  | 0  | 4  | 0  | 0  | 0  | 0 | 0  |
| <b>Ppp2r2c</b>   | -2.8068 | 8.1678  | 19.605 | 1E-05  | 0.0206 | 11  | 7  | 1  | 1  | 7  | 0  | 0  | 0  | 0 | 3  |
| <b>Lin7a</b>     | -2.804  | 5.9002  | 9.9202 | 0.0016 | 0.2581 | 6   | 4  | 0  | 1  | 1  | 1  | 0  | 0  | 0 | 0  |
| <b>Gm35455</b>   | -2.8036 | -0.7971 | 4.3623 | 0.0367 | 0.8127 | 0   | 2  | 3  | 0  | 0  | 0  | 0  | 0  | 0 | 0  |
| <b>LOC108167</b> | -2.7995 | 0.9057  | 16.679 | 4E-05  | 0.0442 | 14  | 13 | 7  | 6  | 4  | 1  | 0  | 1  | 2 | 1  |
| <b>Abcg4</b>     | -2.7978 | 4.0536  | 9.7841 | 0.0018 | 0.2615 | 7   | 4  | 1  | 0  | 0  | 0  | 0  | 0  | 1 | 0  |
| <b>Ccdc36</b>    | -2.7936 | -0.6364 | 4.1305 | 0.0421 | 0.8427 | 2   | 0  | 1  | 0  | 1  | 0  | 0  | 0  | 0 | 0  |
| <b>Gm32807</b>   | -2.7907 | -0.0473 | 4.5216 | 0.0335 | 0.7916 | 0   | 5  | 0  | 0  | 0  | 0  | 0  | 0  | 0 | 0  |
| <b>Mir3109</b>   | -2.7895 | -0.5568 | 5.4651 | 0.0194 | 0.6697 | 3   | 0  | 3  | 3  | 2  | 0  | 0  | 0  | 0 | 1  |
| <b>Gm30970</b>   | -2.7893 | -0.0246 | 4.6635 | 0.0308 | 0.772  | 0   | 4  | 5  | 0  | 3  | 1  | 0  | 0  | 0 | 0  |
| <b>Gm31092</b>   | -2.7892 | -0.8354 | 4.3849 | 0.0363 | 0.811  | 0   | 4  | 1  | 0  | 0  | 0  | 0  | 0  | 0 | 0  |
| <b>Gpr182</b>    | -2.7832 | 0.2101  | 4.6359 | 0.0313 | 0.7726 | 0   | 0  | 0  | 3  | 1  | 0  | 0  | 0  | 0 | 0  |
| <b>Itga5</b>     | -2.7813 | -0.4716 | 4.12   | 0.0424 | 0.8429 | 0   | 3  | 2  | 0  | 0  | 0  | 0  | 0  | 0 | 0  |
| <b>Tmprss12</b>  | -2.7811 | -0.5791 | 4.3286 | 0.0375 | 0.8131 | 2   | 8  | 0  | 4  | 3  | 0  | 2  | 0  | 0 | 0  |
| <b>Il21r</b>     | -2.7763 | 0.105   | 4.8042 | 0.0284 | 0.7519 | 3   | 0  | 0  | 0  | 1  | 0  | 0  | 0  | 0 | 0  |
| <b>Tbx1</b>      | -2.7733 | 0.2473  | 5.9551 | 0.0147 | 0.6067 | 6   | 0  | 3  | 0  | 2  | 1  | 0  | 0  | 0 | 0  |
| <b>Pcdhga5</b>   | -2.7671 | 0.2972  | 4.7633 | 0.0291 | 0.7563 | 0   | 0  | 0  | 3  | 1  | 0  | 0  | 0  | 0 | 0  |
| <b>Sytl5</b>     | -2.767  | -0.2515 | 6.0366 | 0.014  | 0.604  | 2   | 5  | 0  | 5  | 0  | 0  | 0  | 1  | 0 | 0  |
| <b>Gm5103</b>    | -2.7578 | -0.2332 | 7.6447 | 0.0057 | 0.434  | 4   | 13 | 4  | 6  | 1  | 0  | 0  | 2  | 0 | 1  |
| <b>Nrk</b>       | -2.7573 | -0.1366 | 4.231  | 0.0397 | 0.8235 | 4   | 0  | 0  | 0  | 0  | 0  | 0  | 0  | 0 | 0  |
| <b>Als2cr11b</b> | -2.7425 | -0.5732 | 4.3107 | 0.0379 | 0.8131 | 2   | 0  | 0  | 2  | 0  | 0  | 0  | 0  | 0 | 0  |
| <b>2410124H1</b> | -2.7423 | -0.8894 | 4.0438 | 0.0443 | 0.8557 | 1   | 0  | 2  | 0  | 1  | 0  | 0  | 0  | 0 | 0  |
| <b>Hbb-bs</b>    | -2.7396 | 9.4766  | 15.158 | 1E-04  | 0.0631 | 790 | 71 | 15 | 7  | 51 | 74 | 14 | 31 | 8 | 10 |
| <b>Gm41223</b>   | -2.7379 | -0.7386 | 3.9502 | 0.0469 | 0.8678 | 0   | 0  | 0  | 4  | 0  | 0  | 0  | 0  | 0 | 0  |
| <b>Lepr</b>      | -2.7372 | 0.8905  | 4.6557 | 0.031  | 0.7726 | 4   | 0  | 0  | 0  | 0  | 0  | 0  | 0  | 0 | 0  |
| <b>Kcnj8</b>     | -2.7358 | 0.6004  | 4.6774 | 0.0306 | 0.7712 | 4   | 0  | 0  | 0  | 0  | 0  | 0  | 0  | 0 | 0  |
| <b>Rab20</b>     | -2.7355 | 1.0617  | 10.335 | 0.0013 | 0.2316 | 9   | 5  | 2  | 7  | 2  | 0  | 0  | 1  | 0 | 2  |
| <b>Itgb1bp2</b>  | -2.7353 | -0.7388 | 4.7363 | 0.0295 | 0.7616 | 0   | 0  | 1  | 2  | 1  | 0  | 0  | 0  | 0 | 0  |
| <b>Prdm6</b>     | -2.7352 | 0.3531  | 4.3659 | 0.0367 | 0.8126 | 1   | 0  | 0  | 3  | 0  | 0  | 0  | 0  | 0 | 0  |
| <b>Them5</b>     | -2.7348 | 2.6715  | 8.3863 | 0.0038 | 0.3726 | 6   | 0  | 2  | 0  | 3  | 0  | 0  | 0  | 0 | 1  |
| <b>Gm1821</b>    | -2.7291 | 0.3986  | 8.4478 | 0.0037 | 0.3673 | 12  | 2  | 0  | 3  | 5  | 0  | 1  | 0  | 0 | 2  |
| <b>Gpr3</b>      | -2.7289 | 1.6722  | 5.2145 | 0.0224 | 0.6995 | 0   | 0  | 0  | 0  | 4  | 0  | 0  | 0  | 0 | 0  |
| <b>Plekha4</b>   | -2.7262 | 6.4798  | 22.513 | 2E-06  | 0.0158 | 7   | 12 | 3  | 9  | 2  | 0  | 0  | 0  | 1 | 3  |
| <b>P2ry13</b>    | -2.7229 | 0.384   | 4.8509 | 0.0276 | 0.7469 | 4   | 0  | 0  | 0  | 0  | 0  | 0  | 0  | 0 | 0  |
| <b>Gm39643</b>   | -2.7202 | -0.3501 | 6.2427 | 0.0125 | 0.5756 | 7   | 5  | 10 | 2  | 2  | 0  | 0  | 3  | 0 | 0  |
| <b>Ifnk</b>      | -2.7184 | -0.4197 | 3.8522 | 0.0497 | 0.8726 | 0   | 0  | 3  | 1  | 5  | 0  | 0  | 0  | 0 | 1  |
| <b>B230311BC</b> | -2.7169 | 1.3594  | 5.149  | 0.0233 | 0.7084 | 0   | 0  | 0  | 2  | 2  | 0  | 0  | 0  | 0 | 0  |
| <b>Ttll9</b>     | -2.7161 | 0.7922  | 4.7381 | 0.0295 | 0.7616 | 0   | 0  | 0  | 4  | 0  | 0  | 0  | 0  | 0 | 0  |
| <b>LOC108168</b> | -2.7157 | 0.019   | 4.3785 | 0.0364 | 0.8112 | 7   | 1  | 1  | 13 | 0  | 0  | 0  | 0  | 2 | 0  |
| <b>B4galnt3</b>  | -2.7149 | 0.862   | 4.7613 | 0.0291 | 0.7563 | 0   | 0  | 0  | 4  | 0  | 0  | 0  | 0  | 0 | 0  |
| <b>Al115009</b>  | -2.7144 | 0.7102  | 4.9446 | 0.0262 | 0.735  | 4   | 0  | 0  | 0  | 0  | 0  | 0  | 0  | 0 | 0  |
| <b>Sez6l</b>     | -2.7125 | 1.5115  | 5.1663 | 0.023  | 0.7063 | 2   | 0  | 0  | 0  | 2  | 0  | 0  | 0  | 0 | 0  |
| <b>Sfrp2</b>     | -2.7117 | 1.0853  | 7.518  | 0.0061 | 0.4459 | 23  | 0  | 1  | 3  | 2  | 0  | 0  | 4  | 0 | 0  |
| <b>Gm41313</b>   | -2.7098 | -0.3367 | 4.2138 | 0.0401 | 0.8286 | 3   | 0  | 1  | 0  | 0  | 0  | 0  | 0  | 0 | 0  |
| <b>Gjd2</b>      | -2.7016 | 1.63    | 5.0618 | 0.0245 | 0.7207 | 4   | 0  | 0  | 0  | 0  | 0  | 0  | 0  | 0 | 0  |
| <b>Abca6</b>     | -2.6993 | 3.8468  | 5.2185 | 0.0223 | 0.6995 | 0   | 0  | 0  | 0  | 4  | 0  | 0  | 0  | 0 | 0  |
| <b>Lrrtm4</b>    | -2.6948 | 2.2324  | 5.1717 | 0.023  | 0.7051 | 3   | 0  | 0  | 0  | 1  | 0  | 0  | 0  | 0 | 0  |
| <b>Angptl6</b>   | -2.6939 | -0.6531 | 4.7269 | 0.0297 | 0.7647 | 1   | 0  | 1  | 2  | 0  | 0  | 0  | 0  | 0 | 0  |
| <b>Trpv1</b>     | -2.6939 | 3.8862  | 5.1746 | 0.0229 | 0.7051 | 3   | 0  | 0  | 0  | 1  | 0  | 0  | 0  | 0 | 0  |
| <b>Hus1b</b>     | -2.6888 | -0.8317 | 3.9747 | 0.0462 | 0.8611 | 1   | 1  | 0  | 2  | 0  | 0  | 0  | 0  | 0 | 0  |
| <b>Poln</b>      | -2.6875 | -0.1448 | 4.5606 | 0.0327 | 0.7852 | 0   | 0  | 11 | 0  | 1  | 0  | 0  | 0  | 0 | 1  |
| <b>Gm35715</b>   | -2.6866 | 0.0557  | 6.2671 | 0.0123 | 0.5747 | 10  | 7  | 2  | 12 | 1  | 0  | 2  | 0  | 1 | 1  |
| <b>Haghl</b>     | -2.686  | 0.1492  | 4.3309 | 0.0374 | 0.8131 | 0   | 0  | 3  | 0  | 1  | 0  | 0  | 0  | 0 | 0  |
| <b>Hecw1</b>     | -2.6841 | 6.8525  | 5.2165 | 0.0224 | 0.6995 | 0   | 0  | 0  | 1  | 3  | 0  | 0  | 0  | 0 | 0  |
| <b>Opn3</b>      | -2.6826 | 2.8218  | 5.1229 | 0.0236 | 0.712  | 2   | 1  | 0  | 1  | 0  | 0  | 0  | 0  | 0 | 0  |
| <b>Cacng2</b>    | -2.6821 | 5.4409  | 5.1743 | 0.0229 | 0.7051 | 0   | 0  | 2  | 1  | 1  | 0  | 0  | 0  | 0 | 0  |
| <b>Gm33185</b>   | -2.6812 | -0.6606 | 3.9304 | 0.0474 | 0.8678 | 0   | 1  | 2  | 0  | 1  | 0  | 0  | 0  | 0 | 0  |
| <b>Scn1a</b>     | -2.6807 | 6.6996  | 5.2116 | 0.0224 | 0.6995 | 4   | 0  | 0  | 0  | 0  | 0  | 0  | 0  | 0 | 0  |
| <b>Scn9a</b>     | -2.6793 | 7.7029  | 5.2039 | 0.0225 | 0.702  | 0   | 0  | 3  | 0  | 1  | 0  | 0  | 0  | 0 | 0  |
| <b>Rab33a</b>    | -2.6779 | 3.0773  | 5.1413 | 0.0234 | 0.7084 | 0   | 0  | 2  | 2  | 0  | 0  | 0  | 0  | 0 | 0  |
| <b>Hapln1</b>    | -2.677  | 3.7686  | 5.1589 | 0.0231 | 0.7074 | 0   | 3  | 0  | 0  | 1  | 0  | 0  | 0  | 0 | 0  |



|           |         |         |        |        |        |    |    |    |    |    |    |   |   |   |   |
|-----------|---------|---------|--------|--------|--------|----|----|----|----|----|----|---|---|---|---|
| Saxo2     | -2.6762 | 1.6685  | 9.2498 | 0.0024 | 0.3127 | 1  | 0  | 7  | 10 | 0  | 0  | 0 | 0 | 0 | 2 |
| Cntn4     | -2.6719 | 3.5493  | 5.1398 | 0.0234 | 0.7084 | 0  | 0  | 4  | 0  | 0  | 0  | 0 | 0 | 0 | 0 |
| Rem2      | -2.6683 | 3.9779  | 5.1288 | 0.0235 | 0.7108 | 0  | 4  | 0  | 0  | 0  | 0  | 0 | 0 | 0 | 0 |
| Adgrb1    | -2.6675 | 3.8524  | 8.4842 | 0.0036 | 0.3649 | 0  | 8  | 0  | 3  | 0  | 0  | 0 | 0 | 0 | 1 |
| Lingo4    | -2.6669 | 2.8181  | 5.1116 | 0.0238 | 0.7149 | 0  | 3  | 1  | 0  | 0  | 0  | 0 | 0 | 0 | 0 |
| Gm35362   | -2.6634 | 2.1052  | 5.0459 | 0.0247 | 0.7214 | 0  | 0  | 4  | 0  | 0  | 0  | 0 | 0 | 0 | 0 |
| Clec10a   | -2.6628 | 0.3687  | 4.548  | 0.033  | 0.7852 | 0  | 3  | 0  | 0  | 1  | 0  | 0 | 0 | 0 | 0 |
| Gm35721   | -2.6569 | 1.2937  | 4.9729 | 0.0257 | 0.7331 | 0  | 0  | 4  | 0  | 0  | 0  | 0 | 0 | 0 | 0 |
| Gm5432    | -2.6508 | -0.2718 | 3.9267 | 0.0475 | 0.8678 | 3  | 1  | 8  | 0  | 0  | 1  | 0 | 0 | 0 | 0 |
| Tnr       | -2.6506 | 2.9251  | 11.347 | 0.0008 | 0.1795 | 2  | 4  | 3  | 2  | 6  | 0  | 1 | 1 | 0 | 0 |
| Gm31734   | -2.6474 | 0.2464  | 5.8421 | 0.0156 | 0.6238 | 9  | 16 | 1  | 7  | 0  | 2  | 1 | 1 | 0 | 0 |
| Gm31436   | -2.646  | -0.6883 | 4.1203 | 0.0424 | 0.8429 | 0  | 1  | 1  | 2  | 0  | 0  | 0 | 0 | 0 | 0 |
| Gm33656   | -2.6383 | -0.0071 | 7.4897 | 0.0062 | 0.4459 | 3  | 10 | 4  | 3  | 3  | 0  | 3 | 0 | 0 | 0 |
| LOC102633 | -2.632  | -0.2262 | 4.5219 | 0.0335 | 0.7916 | 1  | 2  | 1  | 0  | 0  | 0  | 0 | 0 | 0 | 0 |
| Tub       | -2.6305 | 0.1568  | 4.3928 | 0.0361 | 0.811  | 1  | 1  | 2  | 0  | 0  | 0  | 0 | 0 | 0 | 0 |
| Plch1     | -2.6281 | 0.2181  | 4.6332 | 0.0314 | 0.7727 | 0  | 0  | 4  | 0  | 0  | 0  | 0 | 0 | 0 | 0 |
| Gm32709   | -2.6147 | 0.3145  | 7.5678 | 0.0059 | 0.4426 | 1  | 16 | 8  | 1  | 1  | 0  | 0 | 1 | 0 | 2 |
| Slc7a7    | -2.6145 | 0.4266  | 4.6522 | 0.031  | 0.7726 | 0  | 4  | 0  | 0  | 0  | 0  | 0 | 0 | 0 | 0 |
| Gm39256   | -2.607  | 1.0424  | 4.4917 | 0.0341 | 0.7976 | 0  | 2  | 2  | 0  | 0  | 0  | 0 | 0 | 0 | 0 |
| Sncg      | -2.6046 | 9.5047  | 19.582 | 1E-05  | 0.0206 | 12 | 8  | 3  | 0  | 7  | 1  | 0 | 0 | 1 | 2 |
| Ddc       | -2.5995 | 1.2144  | 8.7877 | 0.003  | 0.3378 | 5  | 2  | 4  | 6  | 0  | 1  | 0 | 0 | 0 | 1 |
| Slc25a47  | -2.5986 | 0.9249  | 12.971 | 0.0003 | 0.1116 | 12 | 28 | 5  | 11 | 5  | 5  | 0 | 0 | 1 | 2 |
| 9530026P0 | -2.5948 | 0.436   | 4.462  | 0.0347 | 0.8027 | 0  | 4  | 0  | 0  | 0  | 0  | 0 | 0 | 0 | 0 |
| Zfp804b   | -2.5803 | 1.3261  | 8.8619 | 0.0029 | 0.3294 | 8  | 3  | 6  | 0  | 0  | 0  | 1 | 0 | 1 | 1 |
| Ptprb     | -2.5753 | 3.6781  | 18.263 | 2E-05  | 0.0298 | 31 | 1  | 4  | 5  | 5  | 1  | 0 | 0 | 1 | 5 |
| A830052D  | -2.574  | 0.1893  | 4.2515 | 0.0392 | 0.8224 | 0  | 4  | 0  | 0  | 0  | 0  | 0 | 0 | 0 | 0 |
| Obscn     | -2.5737 | 0.1286  | 3.9103 | 0.048  | 0.8678 | 0  | 0  | 4  | 0  | 0  | 0  | 0 | 0 | 0 | 0 |
| Ccdc65    | -2.5657 | 0.8938  | 5.9312 | 0.0149 | 0.6085 | 2  | 1  | 4  | 0  | 3  | 0  | 0 | 0 | 1 | 0 |
| Acsl6     | -2.5614 | 5.841   | 18.723 | 2E-05  | 0.0264 | 10 | 0  | 8  | 6  | 5  | 0  | 0 | 3 | 0 | 1 |
| Syt5      | -2.561  | 4.3353  | 7.5885 | 0.0059 | 0.4403 | 6  | 3  | 0  | 0  | 1  | 1  | 0 | 0 | 0 | 0 |
| Esr2      | -2.5588 | -0.1124 | 6.9163 | 0.0085 | 0.5048 | 4  | 9  | 0  | 8  | 2  | 2  | 0 | 1 | 0 | 0 |
| Vtn       | -2.5563 | 3.6645  | 7.3656 | 0.0066 | 0.4617 | 3  | 3  | 0  | 4  | 0  | 1  | 0 | 0 | 0 | 0 |
| Gpr179    | -2.5417 | 1.2001  | 7.504  | 0.0062 | 0.4459 | 6  | 2  | 0  | 7  | 1  | 0  | 0 | 0 | 1 | 1 |
| 1700024P1 | -2.5383 | 0.1656  | 7.6726 | 0.0056 | 0.434  | 6  | 5  | 6  | 0  | 0  | 0  | 0 | 0 | 0 | 2 |
| Rtbdn     | -2.5333 | 0.8554  | 5.761  | 0.0164 | 0.6285 | 7  | 2  | 0  | 1  | 0  | 0  | 0 | 0 | 1 | 0 |
| Gfra2     | -2.5295 | 5.8986  | 14.444 | 0.0001 | 0.0808 | 15 | 0  | 1  | 1  | 5  | 2  | 0 | 0 | 0 | 1 |
| LOC102633 | -2.5246 | 1.18    | 5.7798 | 0.0162 | 0.6285 | 4  | 0  | 6  | 0  | 0  | 0  | 0 | 0 | 0 | 1 |
| Mpeg1     | -2.5177 | 1.5344  | 9.0781 | 0.0026 | 0.3165 | 15 | 1  | 2  | 2  | 1  | 0  | 0 | 0 | 0 | 3 |
| Slamf9    | -2.5139 | 0.9004  | 5.3767 | 0.0204 | 0.6838 | 1  | 0  | 6  | 3  | 0  | 0  | 0 | 1 | 0 | 0 |
| LOC105244 | -2.5128 | 0.4265  | 9.1272 | 0.0025 | 0.3165 | 3  | 6  | 8  | 5  | 2  | 0  | 0 | 0 | 2 | 1 |
| LOC105244 | -2.5124 | -0.1269 | 4.0729 | 0.0436 | 0.85   | 9  | 1  | 1  | 3  | 8  | 0  | 0 | 3 | 0 | 1 |
| Gm16062   | -2.5084 | 0.196   | 4.5935 | 0.0321 | 0.7798 | 5  | 4  | 7  | 0  | 0  | 0  | 2 | 0 | 0 | 0 |
| Gpr34     | -2.5082 | 0.8544  | 8.6873 | 0.0032 | 0.3414 | 0  | 3  | 9  | 1  | 3  | 0  | 0 | 2 | 0 | 0 |
| Dlk1      | -2.5021 | 0.9746  | 4.3745 | 0.0365 | 0.8112 | 1  | 0  | 7  | 8  | 4  | 0  | 0 | 0 | 0 | 3 |
| Spdya     | -2.4952 | -0.072  | 5.0338 | 0.0249 | 0.7219 | 3  | 2  | 4  | 8  | 1  | 0  | 0 | 0 | 2 | 0 |
| Gm34064   | -2.4909 | -0.05   | 4.6846 | 0.0304 | 0.7706 | 3  | 2  | 5  | 6  | 0  | 0  | 0 | 2 | 0 | 0 |
| Crybb3    | -2.4862 | 1.5583  | 10.327 | 0.0013 | 0.2316 | 93 | 75 | 7  | 6  | 4  | 14 | 1 | 4 | 1 | 8 |
| Fam47e    | -2.4618 | -0.3395 | 4.0077 | 0.0453 | 0.8577 | 3  | 2  | 5  | 0  | 9  | 1  | 0 | 0 | 1 | 1 |
| C130074G1 | -2.4434 | 3.3473  | 6.3494 | 0.0117 | 0.5588 | 8  | 0  | 0  | 1  | 0  | 0  | 0 | 0 | 0 | 1 |
| Gata3     | -2.4372 | 0.8516  | 5.6927 | 0.017  | 0.6337 | 4  | 1  | 6  | 2  | 6  | 3  | 0 | 0 | 0 | 0 |
| 4930429B2 | -2.4204 | 0.7219  | 5.952  | 0.0147 | 0.6067 | 0  | 5  | 0  | 9  | 1  | 2  | 0 | 0 | 0 | 0 |
| Moxd1     | -2.4173 | 3.0246  | 6.3049 | 0.012  | 0.5662 | 6  | 3  | 0  | 0  | 0  | 0  | 0 | 0 | 0 | 1 |
| Kcnrg     | -2.4151 | 0.1841  | 5.528  | 0.0187 | 0.6593 | 9  | 5  | 5  | 1  | 1  | 1  | 0 | 1 | 0 | 1 |
| Adgrl4    | -2.4143 | 2.5996  | 6.372  | 0.0116 | 0.5577 | 3  | 3  | 1  | 0  | 2  | 0  | 0 | 0 | 1 | 0 |
| Samd15    | -2.41   | 0.8184  | 7.5728 | 0.0059 | 0.4423 | 3  | 4  | 3  | 5  | 0  | 0  | 0 | 0 | 0 | 2 |
| Padi2     | -2.4077 | 4.1599  | 36.209 | 2E-09  | 6E-05  | 26 | 29 | 23 | 4  | 12 | 2  | 7 | 0 | 0 | 7 |
| 2610020C0 | -2.4006 | -0.1154 | 5.466  | 0.0194 | 0.6697 | 7  | 4  | 3  | 1  | 5  | 2  | 0 | 0 | 1 | 0 |
| Enpp2     | -2.3979 | 5.6482  | 16.604 | 5E-05  | 0.0448 | 46 | 1  | 3  | 7  | 8  | 0  | 0 | 4 | 1 | 7 |
| Gm40136   | -2.386  | -0.2452 | 8.2845 | 0.004  | 0.3796 | 4  | 6  | 7  | 3  | 1  | 1  | 0 | 0 | 0 | 2 |
| Nr4a1     | -2.3825 | 3.3685  | 8.3678 | 0.0038 | 0.3742 | 2  | 0  | 0  | 11 | 1  | 0  | 0 | 2 | 0 | 0 |
| Neurod1   | -2.374  | 1.3472  | 6.888  | 0.0087 | 0.5068 | 9  | 0  | 0  | 0  | 4  | 2  | 0 | 0 | 0 | 0 |
| Gpr173    | -2.3673 | 2.3342  | 10.129 | 0.0015 | 0.2468 | 0  | 2  | 4  | 7  | 6  | 0  | 2 | 0 | 1 | 0 |

|           |         |         |        |        |        |    |    |    |    |    |   |   |   |   |   |
|-----------|---------|---------|--------|--------|--------|----|----|----|----|----|---|---|---|---|---|
| Gm40268   | -2.3668 | -0.3927 | 3.9385 | 0.0472 | 0.8678 | 0  | 0  | 5  | 1  | 6  | 1 | 0 | 1 | 0 | 0 |
| Mettl7a3  | -2.3663 | 1.0169  | 3.859  | 0.0495 | 0.8726 | 2  | 0  | 0  | 0  | 1  | 0 | 0 | 0 | 0 | 0 |
| Cited1    | -2.3576 | 1.6734  | 5.9281 | 0.0149 | 0.6085 | 0  | 5  | 4  | 0  | 0  | 0 | 0 | 0 | 1 | 0 |
| Nell2     | -2.3571 | 2.8092  | 3.9015 | 0.0482 | 0.8678 | 1  | 0  | 0  | 0  | 2  | 0 | 0 | 0 | 0 | 0 |
| 2610307P1 | -2.3501 | 1.2708  | 3.8517 | 0.0497 | 0.8726 | 3  | 0  | 0  | 0  | 0  | 0 | 0 | 0 | 0 | 0 |
| Scrt2     | -2.3435 | 3.7137  | 3.8862 | 0.0487 | 0.8683 | 3  | 0  | 0  | 0  | 0  | 0 | 0 | 0 | 0 | 0 |
| Apba2     | -2.3428 | 4.3794  | 3.8896 | 0.0486 | 0.8678 | 3  | 0  | 0  | 0  | 0  | 0 | 0 | 0 | 0 | 0 |
| Brinp1    | -2.3398 | 5.003   | 3.9041 | 0.0482 | 0.8678 | 3  | 0  | 0  | 0  | 0  | 0 | 0 | 0 | 0 | 0 |
| Akap6     | -2.3397 | 7.5926  | 9.0092 | 0.0027 | 0.3197 | 6  | 0  | 7  | 0  | 1  | 0 | 0 | 0 | 0 | 2 |
| Paqr9     | -2.3395 | 3.9833  | 3.9055 | 0.0481 | 0.8678 | 3  | 0  | 0  | 0  | 0  | 0 | 0 | 0 | 0 | 0 |
| Igsf21    | -2.3393 | 4.6314  | 3.9065 | 0.0481 | 0.8678 | 3  | 0  | 0  | 0  | 0  | 0 | 0 | 0 | 0 | 0 |
| Raly1     | -2.3391 | 5.3312  | 3.9071 | 0.0481 | 0.8678 | 3  | 0  | 0  | 0  | 0  | 0 | 0 | 0 | 0 | 0 |
| Pnma2     | -2.339  | 5.606   | 3.9064 | 0.0481 | 0.8678 | 1  | 1  | 0  | 0  | 1  | 0 | 0 | 0 | 0 | 0 |
| Ptprn     | -2.3387 | 6.4263  | 3.895  | 0.0484 | 0.8678 | 0  | 0  | 2  | 0  | 1  | 0 | 0 | 0 | 0 | 0 |
| Gabra4    | -2.3386 | 1.8795  | 3.8542 | 0.0496 | 0.8726 | 2  | 1  | 0  | 0  | 0  | 0 | 0 | 0 | 0 | 0 |
| 29000110C | -2.3342 | 5.1622  | 3.8931 | 0.0485 | 0.8678 | 0  | 2  | 1  | 0  | 0  | 0 | 0 | 0 | 0 | 0 |
| Cacng5    | -2.334  | 4.331   | 3.8897 | 0.0486 | 0.8678 | 0  | 1  | 2  | 0  | 0  | 0 | 0 | 0 | 0 | 0 |
| Rspo2     | -2.3324 | 4.3269  | 3.8738 | 0.049  | 0.8705 | 0  | 0  | 3  | 0  | 0  | 0 | 0 | 0 | 0 | 0 |
| Lama4     | -2.329  | 4.8289  | 11.328 | 0.0008 | 0.1795 | 13 | 1  | 0  | 1  | 4  | 2 | 0 | 1 | 0 | 0 |
| Acap1     | -2.324  | -0.3855 | 4.9722 | 0.0258 | 0.7331 | 3  | 4  | 6  | 2  | 4  | 3 | 0 | 0 | 0 | 0 |
| 1700012D1 | -2.3229 | 0.0534  | 7.0927 | 0.0077 | 0.4918 | 6  | 8  | 12 | 3  | 5  | 2 | 3 | 0 | 0 | 1 |
| Cntd1     | -2.3212 | -0.0179 | 4.2978 | 0.0382 | 0.8143 | 0  | 4  | 7  | 0  | 3  | 0 | 0 | 0 | 0 | 2 |
| Gm31909   | -2.3193 | -0.1197 | 4.0961 | 0.043  | 0.8473 | 0  | 18 | 5  | 5  | 4  | 2 | 0 | 3 | 0 | 0 |
| Gm40996   | -2.3192 | 0.2002  | 5.5253 | 0.0187 | 0.6593 | 0  | 13 | 1  | 5  | 7  | 0 | 0 | 2 | 2 | 0 |
| Tnfsf15   | -2.3178 | 0.1546  | 4.5593 | 0.0327 | 0.7852 | 3  | 0  | 7  | 2  | 3  | 0 | 0 | 0 | 2 | 0 |
| Igfbp6    | -2.2952 | 4.2855  | 11.176 | 0.0008 | 0.1817 | 18 | 0  | 0  | 4  | 1  | 0 | 0 | 3 | 0 | 1 |
| 3200001D2 | -2.2929 | -0.1396 | 6.0027 | 0.0143 | 0.604  | 8  | 6  | 8  | 9  | 4  | 0 | 0 | 5 | 1 | 0 |
| Gm14808   | -2.2921 | 0.4331  | 5.0268 | 0.025  | 0.7219 | 0  | 13 | 0  | 1  | 1  | 0 | 0 | 1 | 0 | 1 |
| Cxcl12    | -2.29   | 3.9478  | 15.596 | 8E-05  | 0.055  | 14 | 3  | 0  | 10 | 2  | 0 | 0 | 1 | 1 | 3 |
| Larp6     | -2.2851 | 3.7911  | 5.5566 | 0.0184 | 0.6548 | 4  | 0  | 0  | 1  | 3  | 0 | 0 | 1 | 0 | 0 |
| Rbp7      | -2.2765 | 0.5259  | 4.5727 | 0.0325 | 0.7828 | 2  | 0  | 2  | 4  | 0  | 0 | 0 | 0 | 0 | 1 |
| Dnaaf3    | -2.2759 | 0.6598  | 4.2497 | 0.0393 | 0.8224 | 0  | 0  | 18 | 0  | 0  | 0 | 0 | 0 | 2 | 0 |
| A030001D1 | -2.2751 | 2.3064  | 22.42  | 2E-06  | 0.0158 | 15 | 21 | 17 | 8  | 7  | 1 | 2 | 1 | 3 | 5 |
| Gm35946   | -2.2746 | 0.3343  | 9.0165 | 0.0027 | 0.3197 | 11 | 9  | 8  | 18 | 10 | 0 | 6 | 4 | 0 | 2 |
| Gabrb3    | -2.2712 | 4.976   | 5.513  | 0.0189 | 0.662  | 8  | 0  | 0  | 0  | 0  | 0 | 0 | 0 | 0 | 1 |
| St8sia1   | -2.2631 | 3.9498  | 5.5467 | 0.0185 | 0.6576 | 3  | 2  | 1  | 1  | 1  | 0 | 1 | 0 | 0 | 0 |
| Tmem169   | -2.2488 | 2.8983  | 7.0637 | 0.0079 | 0.4947 | 4  | 2  | 3  | 3  | 1  | 0 | 0 | 1 | 0 | 1 |
| 2210406O1 | -2.2409 | 1.3386  | 9.0422 | 0.0026 | 0.3188 | 5  | 14 | 0  | 6  | 4  | 0 | 0 | 1 | 1 | 3 |
| Chil1     | -2.2409 | 1.3466  | 5.1411 | 0.0234 | 0.7084 | 71 | 3  | 8  | 3  | 0  | 1 | 1 | 8 | 4 | 1 |
| Stxbp6    | -2.2381 | 4.4201  | 7.7566 | 0.0054 | 0.4269 | 1  | 3  | 5  | 0  | 4  | 0 | 0 | 1 | 1 | 0 |
| A230052G1 | -2.2282 | 0.6096  | 4.1856 | 0.0408 | 0.8338 | 1  | 0  | 4  | 3  | 0  | 1 | 0 | 0 | 0 | 0 |
| Chrn2     | -2.2242 | 3.2811  | 7.6613 | 0.0056 | 0.434  | 0  | 5  | 4  | 4  | 0  | 0 | 0 | 0 | 0 | 2 |
| Gm35150   | -2.2191 | 0.7088  | 5.1807 | 0.0228 | 0.7051 | 2  | 10 | 0  | 7  | 0  | 0 | 0 | 0 | 0 | 3 |
| Krt20     | -2.217  | -0.0525 | 5.0838 | 0.0242 | 0.7184 | 0  | 10 | 5  | 9  | 4  | 1 | 0 | 0 | 0 | 4 |
| LOC108167 | -2.2132 | 0.2756  | 5.2203 | 0.0223 | 0.6995 | 10 | 8  | 18 | 6  | 5  | 0 | 0 | 9 | 0 | 0 |
| Slc9a5    | -2.1937 | 2.5673  | 6.5086 | 0.0107 | 0.547  | 0  | 4  | 5  | 4  | 0  | 0 | 0 | 0 | 0 | 2 |
| LOC108167 | -2.1894 | 1.3677  | 7.9161 | 0.0049 | 0.4069 | 0  | 22 | 3  | 3  | 2  | 1 | 1 | 0 | 0 | 3 |
| Lilrb4a   | -2.179  | 1.1632  | 6.5149 | 0.0107 | 0.546  | 13 | 3  | 5  | 2  | 0  | 0 | 0 | 3 | 1 | 0 |
| Slco1a5   | -2.1761 | 0.5153  | 4.3383 | 0.0373 | 0.8131 | 8  | 6  | 0  | 3  | 2  | 0 | 0 | 0 | 2 | 1 |
| Nxph3     | -2.173  | 1.3555  | 7.2152 | 0.0072 | 0.4784 | 5  | 2  | 4  | 3  | 3  | 0 | 0 | 2 | 1 | 0 |
| Gm33370   | -2.1713 | -0.4403 | 3.8415 | 0.05   | 0.8743 | 0  | 2  | 4  | 2  | 0  | 1 | 0 | 0 | 0 | 0 |
| Gm39795   | -2.1682 | 0.6406  | 5.7812 | 0.0162 | 0.6285 | 7  | 20 | 15 | 5  | 3  | 2 | 0 | 7 | 0 | 0 |
| Sh3bgr    | -2.1641 | 4.6034  | 15.007 | 0.0001 | 0.0653 | 13 | 8  | 2  | 7  | 2  | 2 | 0 | 0 | 3 | 1 |
| Fam222a   | -2.1635 | 1.8627  | 6.0767 | 0.0137 | 0.6008 | 3  | 1  | 0  | 8  | 0  | 0 | 0 | 2 | 0 | 0 |
| Inha      | -2.1619 | 1.5034  | 6.1843 | 0.0129 | 0.5845 | 6  | 1  | 3  | 1  | 1  | 0 | 1 | 0 | 0 | 1 |
| Amer2     | -2.1587 | 5.2492  | 9.5578 | 0.002  | 0.2785 | 10 | 2  | 1  | 0  | 4  | 0 | 0 | 1 | 0 | 2 |
| Rftn1     | -2.1566 | 1.4469  | 7.9474 | 0.0048 | 0.4028 | 8  | 4  | 3  | 1  | 1  | 0 | 0 | 2 | 0 | 1 |
| Draxin    | -2.1415 | 0.3382  | 3.8639 | 0.0493 | 0.8716 | 0  | 7  | 7  | 0  | 0  | 0 | 0 | 2 | 0 | 0 |
| Gjc1      | -2.1397 | 2.3694  | 6.4842 | 0.0109 | 0.5486 | 5  | 2  | 0  | 4  | 1  | 0 | 0 | 0 | 1 | 1 |
| Pecam1    | -2.1393 | 2.7688  | 7.185  | 0.0074 | 0.4817 | 21 | 1  | 0  | 0  | 5  | 0 | 0 | 6 | 0 | 0 |
| Sifn3     | -2.1351 | 0.1308  | 5.7461 | 0.0165 | 0.6311 | 5  | 8  | 17 | 0  | 2  | 1 | 3 | 2 | 0 | 0 |
| Slc5a5    | -2.1329 | 3.1812  | 4.3357 | 0.0373 | 0.8131 | 4  | 0  | 1  | 0  | 2  | 0 | 0 | 1 | 0 | 0 |

|           |         |         |        |        |        |     |    |    |    |    |    |    |    |   |    |
|-----------|---------|---------|--------|--------|--------|-----|----|----|----|----|----|----|----|---|----|
| Gm34389   | -2.1326 | 0.337   | 7.3578 | 0.0067 | 0.4629 | 4   | 15 | 6  | 4  | 14 | 0  | 6  | 1  | 1 | 2  |
| 1700047M  | -2.1296 | 0.6564  | 3.9767 | 0.0461 | 0.8611 | 2   | 0  | 1  | 3  | 1  | 1  | 0  | 0  | 0 | 0  |
| Npm3-ps1  | -2.1247 | -0.312  | 4.2746 | 0.0387 | 0.8192 | 8   | 8  | 6  | 1  | 0  | 0  | 0  | 0  | 0 | 4  |
| Clvs1     | -2.121  | 0.0438  | 5.2899 | 0.0214 | 0.6958 | 7   | 4  | 3  | 3  | 0  | 1  | 0  | 1  | 0 | 1  |
| Hba-a2    | -2.1158 | 6.3823  | 5.4637 | 0.0194 | 0.6697 | 121 | 4  | 0  | 1  | 15 | 21 | 2  | 11 | 0 | 0  |
| Fam155a   | -2.0923 | 4.7378  | 4.5497 | 0.0329 | 0.7852 | 4   | 0  | 0  | 1  | 2  | 0  | 0  | 0  | 0 | 1  |
| Lin7b     | -2.0881 | 2.0257  | 6.0616 | 0.0138 | 0.6019 | 3   | 7  | 0  | 2  | 0  | 0  | 0  | 0  | 1 | 1  |
| Abcd2     | -2.0877 | 4.2244  | 4.5326 | 0.0333 | 0.7882 | 6   | 0  | 0  | 0  | 1  | 0  | 0  | 0  | 1 | 0  |
| Vstm2l    | -2.0873 | 6.587   | 4.5527 | 0.0329 | 0.7852 | 0   | 0  | 0  | 6  | 1  | 0  | 0  | 0  | 0 | 1  |
| Slit1     | -2.0857 | 4.7805  | 4.4959 | 0.034  | 0.7963 | 5   | 1  | 1  | 0  | 0  | 0  | 0  | 0  | 0 | 1  |
| Nap1l2    | -2.0838 | 4.7919  | 4.5183 | 0.0335 | 0.7919 | 1   | 0  | 2  | 3  | 1  | 0  | 0  | 0  | 1 | 0  |
| Gm3435    | -2.0801 | 0.9206  | 6.2485 | 0.0124 | 0.5751 | 6   | 3  | 3  | 16 | 4  | 2  | 0  | 5  | 0 | 0  |
| Gm39581   | -2.0793 | 0.8753  | 10.568 | 0.0012 | 0.2214 | 10  | 9  | 21 | 6  | 7  | 0  | 1  | 6  | 1 | 3  |
| Gm10575   | -2.0765 | 1.3647  | 7.8129 | 0.0052 | 0.4203 | 8   | 8  | 1  | 4  | 0  | 0  | 0  | 2  | 0 | 2  |
| Rasgrf2   | -2.0756 | 5.0193  | 4.4341 | 0.0352 | 0.8074 | 3   | 0  | 4  | 0  | 0  | 0  | 0  | 0  | 1 | 0  |
| Cd80      | -2.0659 | 0.2439  | 5.2713 | 0.0217 | 0.6958 | 2   | 7  | 14 | 0  | 1  | 1  | 0  | 0  | 1 | 2  |
| Tm6sf2    | -2.0638 | -0.0797 | 4.5981 | 0.032  | 0.7798 | 7   | 8  | 3  | 5  | 0  | 2  | 0  | 0  | 1 | 1  |
| Gpr161    | -2.0587 | 1.7608  | 7.9599 | 0.0048 | 0.4019 | 7   | 7  | 9  | 5  | 2  | 0  | 0  | 0  | 0 | 6  |
| Slmo1     | -2.0577 | 3.3869  | 7.9561 | 0.0048 | 0.4019 | 0   | 5  | 5  | 4  | 2  | 0  | 0  | 0  | 0 | 3  |
| Necab2    | -2.0574 | 2.2387  | 4.1205 | 0.0424 | 0.8429 | 0   | 0  | 6  | 1  | 0  | 0  | 0  | 1  | 0 | 0  |
| Nckap5l   | -2.0558 | 2.8469  | 15.669 | 8E-05  | 0.055  | 11  | 10 | 9  | 17 | 1  | 4  | 0  | 4  | 0 | 2  |
| Olf856-ps | -2.0509 | 0.3652  | 6.022  | 0.0141 | 0.604  | 4   | 4  | 4  | 6  | 2  | 0  | 0  | 0  | 0 | 4  |
| Rax       | -2.0501 | -0.3075 | 4.823  | 0.0281 | 0.7493 | 8   | 6  | 2  | 6  | 0  | 2  | 0  | 0  | 1 | 1  |
| Gm36283   | -2.0458 | 1.075   | 9.7739 | 0.0018 | 0.2615 | 18  | 19 | 20 | 11 | 11 | 5  | 4  | 2  | 0 | 7  |
| Aqp4      | -2.0214 | 4.5439  | 5.9325 | 0.0149 | 0.6085 | 6   | 1  | 1  | 2  | 1  | 1  | 0  | 0  | 0 | 1  |
| Fabp3     | -2.02   | 4.8735  | 15.174 | 1E-04  | 0.0631 | 11  | 9  | 5  | 4  | 4  | 1  | 0  | 1  | 0 | 5  |
| Grb14     | -2.0169 | 5.3422  | 6.0751 | 0.0137 | 0.6008 | 0   | 0  | 0  | 7  | 4  | 0  | 0  | 0  | 2 | 0  |
| Pde6b     | -2.0159 | 0.4915  | 3.9525 | 0.0468 | 0.8678 | 48  | 2  | 2  | 0  | 1  | 2  | 3  | 0  | 2 | 5  |
| Prox1     | -2.013  | 1.7252  | 5.3239 | 0.021  | 0.6943 | 28  | 0  | 1  | 0  | 0  | 1  | 0  | 0  | 2 | 3  |
| Kcnh2     | -2.0105 | 4.785   | 6.0202 | 0.0141 | 0.604  | 6   | 0  | 5  | 0  | 0  | 1  | 0  | 0  | 0 | 1  |
| Gm34006   | -2.0068 | 0.7253  | 4.3449 | 0.0371 | 0.8131 | 0   | 0  | 4  | 7  | 0  | 0  | 0  | 0  | 0 | 2  |
| Pcdhga11  | -2.0062 | 1.8006  | 11.273 | 0.0008 | 0.1801 | 5   | 5  | 10 | 13 | 8  | 4  | 0  | 3  | 2 | 0  |
| Zfp85os   | -1.9933 | 0.5375  | 6.3169 | 0.012  | 0.5636 | 2   | 8  | 10 | 11 | 3  | 0  | 0  | 2  | 1 | 4  |
| Fcor      | -1.9911 | 1.1482  | 6.5987 | 0.0102 | 0.5433 | 1   | 1  | 5  | 6  | 2  | 1  | 0  | 0  | 0 | 2  |
| Cdk5r2    | -1.9799 | 7.4116  | 7.6589 | 0.0056 | 0.434  | 10  | 3  | 0  | 0  | 2  | 0  | 0  | 0  | 1 | 2  |
| 2310016G1 | -1.9792 | 2.2348  | 15.963 | 6E-05  | 0.053  | 3   | 12 | 14 | 18 | 4  | 3  | 1  | 2  | 3 | 2  |
| LOC108168 | -1.9788 | 1.1106  | 5.6031 | 0.0179 | 0.6476 | 4   | 13 | 33 | 12 | 11 | 1  | 0  | 14 | 0 | 2  |
| Usp29     | -1.9627 | 2.5359  | 5.3198 | 0.0211 | 0.6946 | 2   | 7  | 2  | 0  | 0  | 0  | 0  | 0  | 1 | 1  |
| Ctnna2    | -1.9425 | 6.4747  | 12.463 | 0.0004 | 0.1332 | 14  | 4  | 2  | 5  | 2  | 0  | 2  | 0  | 0 | 4  |
| Clcn1     | -1.9416 | 0.437   | 4.2899 | 0.0383 | 0.8171 | 6   | 5  | 3  | 8  | 1  | 4  | 1  | 0  | 0 | 0  |
| Cd1d1     | -1.9404 | 0.7038  | 4.284  | 0.0385 | 0.8177 | 3   | 10 | 2  | 1  | 0  | 0  | 0  | 0  | 0 | 3  |
| Tnfrsf4   | -1.9326 | 0.5214  | 4.6338 | 0.0313 | 0.7727 | 5   | 3  | 18 | 9  | 8  | 2  | 3  | 5  | 0 | 1  |
| Timm8a1   | -1.9324 | 1.0593  | 8.2338 | 0.0041 | 0.3832 | 5   | 5  | 14 | 7  | 3  | 0  | 5  | 0  | 0 | 3  |
| Lrrc14b   | -1.9265 | 0.5487  | 3.9157 | 0.0478 | 0.8678 | 0   | 5  | 7  | 0  | 4  | 0  | 0  | 0  | 2 | 1  |
| Asb2      | -1.9258 | 2.2233  | 6.2933 | 0.0121 | 0.5677 | 0   | 9  | 2  | 4  | 0  | 1  | 0  | 0  | 0 | 2  |
| Gm34736   | -1.9195 | 0.7561  | 5.1417 | 0.0234 | 0.7084 | 5   | 3  | 11 | 1  | 1  | 2  | 0  | 0  | 2 | 0  |
| Slc17a7   | -1.8854 | 5.8646  | 8.3373 | 0.0039 | 0.3742 | 16  | 2  | 0  | 0  | 0  | 1  | 0  | 0  | 1 | 2  |
| Slc22a4   | -1.8805 | 1.3844  | 11.346 | 0.0008 | 0.1795 | 21  | 10 | 48 | 14 | 8  | 2  | 14 | 5  | 1 | 4  |
| Greb1     | -1.8804 | 3.4972  | 4.8298 | 0.028  | 0.7488 | 3   | 3  | 1  | 3  | 0  | 0  | 0  | 1  | 0 | 1  |
| Hba-a1    | -1.8794 | 7.1255  | 6.4112 | 0.0113 | 0.5543 | 189 | 6  | 6  | 4  | 13 | 31 | 14 | 14 | 0 | 4  |
| Ogg1      | -1.8792 | 0.8297  | 6.951  | 0.0084 | 0.5048 | 5   | 7  | 6  | 3  | 8  | 3  | 0  | 1  | 1 | 2  |
| Rgs5      | -1.879  | 5.3495  | 9.0219 | 0.0027 | 0.3197 | 27  | 0  | 1  | 3  | 3  | 1  | 3  | 0  | 0 | 5  |
| Gm36885   | -1.8739 | 1.0576  | 6.1561 | 0.0131 | 0.5875 | 14  | 29 | 16 | 24 | 5  | 2  | 17 | 0  | 0 | 5  |
| Ccdc3     | -1.862  | 2.2303  | 6.0657 | 0.0138 | 0.6019 | 117 | 1  | 6  | 9  | 7  | 4  | 10 | 18 | 0 | 10 |
| Ppof2     | -1.8617 | 0.2874  | 4.9238 | 0.0265 | 0.7377 | 3   | 12 | 26 | 8  | 0  | 3  | 4  | 3  | 0 | 1  |
| Gpr35     | -1.8572 | 3.1121  | 8.3936 | 0.0038 | 0.3726 | 3   | 3  | 11 | 4  | 1  | 2  | 0  | 0  | 0 | 3  |
| Col14a1   | -1.8486 | 4.4045  | 10.914 | 0.001  | 0.1951 | 21  | 0  | 10 | 1  | 2  | 2  | 0  | 1  | 5 | 0  |
| Gm14502   | -1.848  | 0.511   | 4.2427 | 0.0394 | 0.823  | 0   | 25 | 13 | 11 | 0  | 0  | 3  | 5  | 0 | 3  |
| Zfp418    | -1.8411 | 0.3229  | 5.5151 | 0.0189 | 0.662  | 3   | 9  | 2  | 7  | 2  | 1  | 0  | 0  | 2 | 2  |
| Prort3    | -1.8377 | 4.2428  | 13.963 | 0.0002 | 0.0871 | 0   | 18 | 13 | 8  | 3  | 0  | 0  | 8  | 0 | 2  |
| Gm34079   | -1.8315 | 1.0883  | 7.6138 | 0.0058 | 0.4373 | 4   | 21 | 13 | 20 | 8  | 7  | 0  | 5  | 1 | 3  |
| Prokr2    | -1.828  | 2.7839  | 14.039 | 0.0002 | 0.0859 | 5   | 15 | 11 | 8  | 2  | 0  | 5  | 1  | 1 | 3  |

|                  |         |         |        |        |        |     |    |     |    |    |    |    |    |    |    |
|------------------|---------|---------|--------|--------|--------|-----|----|-----|----|----|----|----|----|----|----|
| <b>Tmem44</b>    | -1.8182 | 1.6081  | 9.1237 | 0.0025 | 0.3165 | 8   | 8  | 26  | 17 | 12 | 2  | 0  | 10 | 0  | 7  |
| <b>Col15a1</b>   | -1.8179 | 4.154   | 7.1419 | 0.0075 | 0.4864 | 16  | 1  | 0   | 0  | 0  | 0  | 0  | 0  | 1  | 3  |
| <b>Ttll8</b>     | -1.8154 | 1.7232  | 9.8478 | 0.0017 | 0.261  | 5   | 9  | 7   | 9  | 2  | 1  | 5  | 0  | 0  | 2  |
| <b>LOC105244</b> | -1.8056 | 0.3828  | 4.3251 | 0.0376 | 0.8131 | 4   | 6  | 8   | 8  | 10 | 0  | 0  | 3  | 3  | 3  |
| <b>Gm20036</b>   | -1.8033 | 0.9426  | 6.3534 | 0.0117 | 0.5582 | 10  | 5  | 9   | 9  | 1  | 0  | 8  | 0  | 1  | 0  |
| <b>Eva1c</b>     | -1.7948 | 2.504   | 9.8247 | 0.0017 | 0.261  | 13  | 4  | 5   | 5  | 1  | 2  | 0  | 2  | 0  | 3  |
| <b>Flt1</b>      | -1.7874 | 3.9971  | 5.6544 | 0.0174 | 0.6381 | 11  | 0  | 2   | 0  | 0  | 0  | 0  | 1  | 1  | 1  |
| <b>8430431K1</b> | -1.7849 | 0.4914  | 4.2827 | 0.0385 | 0.8177 | 7   | 4  | 5   | 5  | 0  | 1  | 0  | 2  | 0  | 2  |
| <b>Glis1</b>     | -1.7837 | 1.0249  | 10.097 | 0.0015 | 0.2474 | 15  | 20 | 25  | 15 | 3  | 3  | 5  | 1  | 3  | 7  |
| <b>Glb1l</b>     | -1.7826 | 0.7753  | 6.9972 | 0.0082 | 0.4992 | 7   | 7  | 6   | 5  | 0  | 2  | 0  | 2  | 0  | 2  |
| <b>Gm40578</b>   | -1.7772 | 0.8259  | 4.231  | 0.0397 | 0.8235 | 0   | 3  | 3   | 8  | 0  | 0  | 0  | 0  | 2  | 1  |
| <b>Calml4</b>    | -1.777  | 2.0612  | 4.7533 | 0.0292 | 0.7585 | 8   | 5  | 0   | 0  | 0  | 0  | 0  | 1  | 0  | 2  |
| <b>Gm31282</b>   | -1.7728 | 2.8228  | 12.6   | 0.0004 | 0.1273 | 6   | 28 | 8   | 5  | 11 | 5  | 0  | 2  | 6  | 1  |
| <b>Ino80dos</b>  | -1.7713 | 1.4714  | 6.0773 | 0.0137 | 0.6008 | 14  | 33 | 18  | 4  | 11 | 0  | 15 | 0  | 1  | 7  |
| <b>Gm38398</b>   | -1.7691 | 0.5458  | 5.4824 | 0.0192 | 0.6697 | 5   | 10 | 13  | 11 | 8  | 1  | 1  | 8  | 0  | 3  |
| <b>Gm527</b>     | -1.7675 | 1.6805  | 10.186 | 0.0014 | 0.2424 | 6   | 5  | 7   | 10 | 3  | 2  | 1  | 2  | 0  | 3  |
| <b>Cldn5</b>     | -1.767  | 3.7406  | 6.2413 | 0.0125 | 0.5756 | 13  | 0  | 0   | 0  | 3  | 0  | 0  | 0  | 1  | 3  |
| <b>C4b</b>       | -1.7665 | 3.1884  | 8.7315 | 0.0031 | 0.3385 | 3   | 6  | 6   | 7  | 2  | 0  | 0  | 4  | 0  | 2  |
| <b>Syp</b>       | -1.74   | 6.9653  | 4.1934 | 0.0406 | 0.8329 | 6   | 3  | 0   | 0  | 0  | 0  | 0  | 1  | 1  | 0  |
| <b>Gab3</b>      | -1.7376 | 1.6187  | 4.6084 | 0.0318 | 0.7776 | 3   | 7  | 0   | 3  | 0  | 3  | 0  | 0  | 0  | 0  |
| <b>Mlc1</b>      | -1.7286 | 3.8998  | 9.9438 | 0.0016 | 0.2574 | 9   | 7  | 8   | 1  | 2  | 2  | 1  | 0  | 0  | 4  |
| <b>Sh2d5</b>     | -1.7281 | 2.924   | 5.8641 | 0.0155 | 0.6198 | 1   | 14 | 2   | 0  | 0  | 0  | 0  | 3  | 0  | 1  |
| <b>Gabrb1</b>    | -1.7233 | 3.0987  | 3.8471 | 0.0498 | 0.8741 | 0   | 5  | 1   | 2  | 1  | 2  | 0  | 0  | 0  | 0  |
| <b>Cox4i2</b>    | -1.7227 | 0.7169  | 4.8511 | 0.0276 | 0.7469 | 3   | 12 | 4   | 5  | 0  | 1  | 0  | 0  | 4  | 0  |
| <b>Caskin1</b>   | -1.7223 | 5.7686  | 13.845 | 0.0002 | 0.0893 | 8   | 14 | 5   | 11 | 0  | 3  | 0  | 0  | 3  | 4  |
| <b>Hipk4</b>     | -1.7203 | 1.1851  | 4.4986 | 0.0339 | 0.7963 | 1   | 23 | 15  | 1  | 0  | 1  | 0  | 6  | 0  | 2  |
| <b>Fkbp1b</b>    | -1.72   | 6.8829  | 6.6069 | 0.0102 | 0.543  | 2   | 0  | 8   | 4  | 2  | 0  | 0  | 2  | 0  | 2  |
| <b>Gm973</b>     | -1.7165 | 1.4193  | 5.3031 | 0.0213 | 0.6958 | 26  | 6  | 6   | 0  | 7  | 9  | 0  | 4  | 0  | 0  |
| <b>C3ar1</b>     | -1.7156 | 2.2285  | 10.262 | 0.0014 | 0.2372 | 4   | 20 | 13  | 6  | 4  | 0  | 0  | 4  | 1  | 7  |
| <b>A930015Dl</b> | -1.7118 | 0.8573  | 4.5666 | 0.0326 | 0.7847 | 16  | 4  | 2   | 2  | 6  | 6  | 2  | 1  | 0  | 0  |
| <b>Slc1a6</b>    | -1.7068 | 2.1144  | 8.8037 | 0.003  | 0.3369 | 10  | 12 | 13  | 0  | 4  | 1  | 0  | 5  | 2  | 2  |
| <b>Gm39069</b>   | -1.7052 | 1.0978  | 5.1987 | 0.0226 | 0.7032 | 7   | 10 | 8   | 4  | 2  | 2  | 0  | 6  | 0  | 0  |
| <b>Gm40074</b>   | -1.7036 | 1.5554  | 4.1272 | 0.0422 | 0.8429 | 0   | 2  | 6   | 7  | 1  | 0  | 0  | 0  | 0  | 4  |
| <b>Fbp2</b>      | -1.6982 | 2.0445  | 4.7308 | 0.0296 | 0.7635 | 0   | 6  | 0   | 3  | 13 | 5  | 0  | 2  | 0  | 0  |
| <b>Padi1</b>     | -1.6938 | 2.4026  | 5.0387 | 0.0248 | 0.7219 | 110 | 66 | 203 | 52 | 71 | 8  | 32 | 0  | 26 | 69 |
| <b>Gm34845</b>   | -1.6791 | 0.7962  | 9.0874 | 0.0026 | 0.3165 | 16  | 19 | 22  | 8  | 15 | 2  | 5  | 9  | 1  | 7  |
| <b>Gm41678</b>   | -1.6651 | 0.5544  | 4.0638 | 0.0438 | 0.8522 | 0   | 12 | 2   | 9  | 6  | 0  | 5  | 3  | 0  | 1  |
| <b>Slc35f1</b>   | -1.6644 | 5.8185  | 4.7922 | 0.0286 | 0.7541 | 6   | 1  | 5   | 0  | 0  | 0  | 0  | 0  | 1  | 2  |
| <b>Snhg11</b>    | -1.6631 | 7.8529  | 9.2327 | 0.0024 | 0.3133 | 17  | 10 | 6   | 0  | 0  | 1  | 0  | 6  | 0  | 2  |
| <b>Pcdh11x</b>   | -1.662  | 3.3115  | 6.2117 | 0.0127 | 0.5801 | 7   | 0  | 1   | 7  | 3  | 1  | 1  | 3  | 0  | 0  |
| <b>2410002F2</b> | -1.6608 | 0.5686  | 5.0087 | 0.0252 | 0.7253 | 3   | 12 | 17  | 2  | 2  | 1  | 1  | 5  | 1  | 1  |
| <b>Gm38863</b>   | -1.6593 | 1.434   | 4.0736 | 0.0436 | 0.85   | 0   | 7  | 2   | 3  | 1  | 0  | 0  | 0  | 3  | 0  |
| <b>Plek</b>      | -1.6568 | 2.0983  | 4.9597 | 0.0259 | 0.7335 | 0   | 6  | 0   | 9  | 5  | 1  | 4  | 0  | 0  | 1  |
| <b>LOC102637</b> | -1.6422 | 1.0403  | 7.1222 | 0.0076 | 0.4874 | 20  | 21 | 19  | 9  | 10 | 9  | 10 | 4  | 1  | 0  |
| <b>Slc38a4</b>   | -1.6339 | 1.4881  | 7.6527 | 0.0057 | 0.434  | 7   | 12 | 14  | 15 | 4  | 2  | 0  | 7  | 3  | 2  |
| <b>Ras10b</b>    | -1.6259 | 4.3167  | 7.8663 | 0.005  | 0.4129 | 1   | 15 | 3   | 0  | 3  | 0  | 0  | 0  | 4  | 2  |
| <b>Palm2</b>     | -1.6247 | 5.3892  | 15.188 | 1E-04  | 0.0631 | 11  | 12 | 18  | 2  | 9  | 1  | 0  | 8  | 2  | 4  |
| <b>Coro1a</b>    | -1.6219 | 4.6673  | 5.5377 | 0.0186 | 0.6585 | 3   | 1  | 6   | 4  | 1  | 0  | 0  | 2  | 2  | 0  |
| <b>Gm38720</b>   | -1.6205 | 1.4834  | 6.7848 | 0.0092 | 0.5176 | 13  | 28 | 48  | 30 | 19 | 10 | 8  | 18 | 2  | 4  |
| <b>Gm41834</b>   | -1.6054 | 1.4328  | 7.1292 | 0.0076 | 0.4871 | 5   | 5  | 12  | 30 | 10 | 4  | 9  | 1  | 0  | 7  |
| <b>Dmtn</b>      | -1.6039 | 5.9393  | 21.234 | 4E-06  | 0.0162 | 3   | 20 | 14  | 9  | 21 | 2  | 7  | 2  | 5  | 4  |
| <b>Clec7a</b>    | -1.6    | 1.6521  | 3.9897 | 0.0458 | 0.8609 | 14  | 0  | 5   | 0  | 5  | 0  | 2  | 4  | 0  | 2  |
| <b>Kcnj16</b>    | -1.599  | 2.9725  | 4.1496 | 0.0416 | 0.8381 | 48  | 13 | 11  | 0  | 7  | 0  | 0  | 26 | 0  | 0  |
| <b>Glis3</b>     | -1.5931 | 1.0444  | 6.7878 | 0.0092 | 0.5176 | 26  | 17 | 13  | 4  | 4  | 3  | 2  | 5  | 6  | 1  |
| <b>Cfh</b>       | -1.5928 | 3.1074  | 11.912 | 0.0006 | 0.1538 | 24  | 5  | 16  | 8  | 8  | 3  | 1  | 4  | 0  | 11 |
| <b>Sox8</b>      | -1.591  | 2.8391  | 4.3984 | 0.036  | 0.811  | 1   | 0  | 18  | 0  | 0  | 1  | 2  | 0  | 0  | 2  |
| <b>Ryr3</b>      | -1.5819 | 2.6544  | 6.646  | 0.0099 | 0.5362 | 4   | 5  | 4   | 4  | 4  | 5  | 0  | 0  | 1  | 0  |
| <b>Cntfr</b>     | -1.5797 | 2.9352  | 8.1917 | 0.0042 | 0.3872 | 2   | 10 | 12  | 4  | 0  | 1  | 5  | 0  | 0  | 2  |
| <b>Crispld1</b>  | -1.5726 | 2.8979  | 4.0729 | 0.0436 | 0.85   | 7   | 2  | 0   | 0  | 2  | 2  | 1  | 0  | 0  | 0  |
| <b>Gm6607</b>    | -1.5716 | -0.0465 | 4.2778 | 0.0386 | 0.8189 | 4   | 6  | 7   | 5  | 2  | 1  | 4  | 0  | 1  | 1  |
| <b>Avil</b>      | -1.5712 | 7.7765  | 9.1021 | 0.0026 | 0.3165 | 7   | 1  | 7   | 3  | 9  | 6  | 0  | 0  | 0  | 2  |
| <b>Gm40409</b>   | -1.5672 | 0.9019  | 9.8862 | 0.0017 | 0.2605 | 9   | 11 | 25  | 10 | 13 | 4  | 6  | 6  | 0  | 6  |

|           |         |        |        |        |        |    |    |    |    |    |    |    |    |    |    |
|-----------|---------|--------|--------|--------|--------|----|----|----|----|----|----|----|----|----|----|
| Zfr2      | -1.5627 | 3.0985 | 14.254 | 0.0002 | 0.0813 | 4  | 34 | 16 | 18 | 3  | 7  | 8  | 5  | 1  | 1  |
| LOC102631 | -1.5575 | 1.4586 | 4.9545 | 0.026  | 0.7335 | 15 | 3  | 20 | 3  | 2  | 3  | 5  | 4  | 1  | 0  |
| Zfp711    | -1.5563 | 2.1146 | 6.3861 | 0.0115 | 0.5577 | 2  | 2  | 8  | 9  | 3  | 0  | 0  | 0  | 2  | 5  |
| Zfp382    | -1.5458 | 4.3512 | 17.204 | 3E-05  | 0.0415 | 29 | 18 | 12 | 12 | 5  | 9  | 0  | 3  | 5  | 6  |
| A430090L1 | -1.5434 | 0.8936 | 6.7906 | 0.0092 | 0.5176 | 6  | 17 | 11 | 11 | 7  | 3  | 2  | 3  | 4  | 3  |
| Gm33350   | -1.5426 | 0.8134 | 5.1617 | 0.0231 | 0.707  | 11 | 27 | 12 | 10 | 5  | 3  | 0  | 1  | 5  | 8  |
| Spp1      | -1.533  | 4.281  | 4.8322 | 0.0279 | 0.7488 | 5  | 5  | 4  | 0  | 0  | 0  | 3  | 0  | 0  | 1  |
| Scarna17  | -1.5126 | 1.5325 | 6.7205 | 0.0095 | 0.525  | 12 | 24 | 27 | 17 | 3  | 2  | 6  | 1  | 4  | 11 |
| Ildr2     | -1.5101 | 3.7122 | 8.2228 | 0.0041 | 0.3832 | 11 | 9  | 3  | 5  | 4  | 5  | 0  | 5  | 0  | 0  |
| Tyrrp1    | -1.5097 | 1.9516 | 4.2451 | 0.0394 | 0.823  | 27 | 17 | 15 | 11 | 0  | 11 | 0  | 8  | 0  | 2  |
| Gm26559   | -1.5089 | 1.3942 | 7.5008 | 0.0062 | 0.4459 | 6  | 20 | 7  | 10 | 7  | 4  | 6  | 0  | 5  | 0  |
| Tom1      | -1.5086 | 1.468  | 6.9129 | 0.0086 | 0.5048 | 12 | 11 | 5  | 11 | 4  | 3  | 0  | 1  | 3  | 6  |
| Hmgcll1   | -1.5002 | 2.1214 | 5.2577 | 0.0218 | 0.6987 | 0  | 11 | 5  | 4  | 4  | 1  | 0  | 3  | 2  | 1  |
| Cfap126   | -1.4985 | 1.2536 | 4.8476 | 0.0277 | 0.747  | 16 | 5  | 13 | 10 | 9  | 1  | 0  | 6  | 1  | 10 |
| Gm39165   | -1.4971 | 0.1203 | 4.7436 | 0.0294 | 0.7606 | 2  | 10 | 5  | 10 | 4  | 1  | 5  | 2  | 1  | 1  |
| St3gal6   | -1.4907 | 4.2565 | 7.0816 | 0.0078 | 0.4918 | 6  | 6  | 8  | 3  | 0  | 2  | 0  | 0  | 2  | 3  |
| Dock2     | -1.478  | 1.2228 | 4.3187 | 0.0377 | 0.8131 | 7  | 4  | 0  | 6  | 6  | 3  | 1  | 3  | 0  | 1  |
| Slc4a3    | -1.4582 | 3.8608 | 16.313 | 5E-05  | 0.0461 | 17 | 23 | 48 | 33 | 15 | 7  | 0  | 17 | 11 | 7  |
| LOC108165 | -1.4573 | 1.025  | 6.1609 | 0.0131 | 0.5875 | 11 | 26 | 4  | 9  | 4  | 6  | 0  | 3  | 3  | 4  |
| B3gat2    | -1.4504 | 1.3362 | 5.4272 | 0.0198 | 0.6761 | 14 | 22 | 20 | 9  | 2  | 3  | 0  | 10 | 2  | 5  |
| Alox15    | -1.4483 | 1.8178 | 5.6746 | 0.0172 | 0.6371 | 39 | 44 | 35 | 13 | 1  | 6  | 5  | 8  | 5  | 15 |
| Ctnx1     | -1.4481 | 4.1656 | 9.1905 | 0.0024 | 0.3137 | 3  | 25 | 4  | 4  | 2  | 1  | 4  | 5  | 1  | 1  |
| Apbb1ip   | -1.4474 | 1.3653 | 6.6266 | 0.01   | 0.5403 | 13 | 17 | 11 | 8  | 1  | 7  | 0  | 2  | 2  | 4  |
| Rtn4r     | -1.4399 | 2.3644 | 10.127 | 0.0015 | 0.2468 | 11 | 13 | 9  | 15 | 2  | 5  | 0  | 4  | 3  | 4  |
| Scn8a     | -1.4356 | 7.4576 | 4.2369 | 0.0396 | 0.823  | 6  | 2  | 0  | 3  | 2  | 0  | 0  | 2  | 2  | 0  |
| Ap3b2     | -1.4348 | 7.2095 | 4.1688 | 0.0412 | 0.8374 | 9  | 3  | 0  | 0  | 1  | 3  | 0  | 0  | 1  | 0  |
| Efr3b     | -1.4253 | 4.3173 | 5.6709 | 0.0172 | 0.6378 | 5  | 11 | 2  | 0  | 1  | 2  | 0  | 0  | 3  | 1  |
| Slc38a3   | -1.4233 | 1.5032 | 3.8643 | 0.0493 | 0.8716 | 5  | 8  | 7  | 0  | 0  | 2  | 0  | 4  | 0  | 0  |
| Ccdc177   | -1.4058 | 1.8299 | 5.7803 | 0.0162 | 0.6285 | 8  | 8  | 17 | 9  | 1  | 0  | 10 | 2  | 0  | 3  |
| Osbp2     | -1.4057 | 5.1718 | 11.962 | 0.0005 | 0.1514 | 20 | 9  | 12 | 5  | 2  | 2  | 0  | 5  | 6  | 3  |
| LOC108165 | -1.4033 | 0.5679 | 4.5046 | 0.0338 | 0.7954 | 7  | 7  | 10 | 12 | 9  | 0  | 13 | 4  | 1  | 0  |
| Pde1a     | -1.4026 | 2.9758 | 5.3684 | 0.0205 | 0.6861 | 1  | 2  | 5  | 14 | 4  | 0  | 2  | 3  | 1  | 3  |
| Adcy1     | -1.4016 | 4.9162 | 12.86  | 0.0003 | 0.1161 | 17 | 6  | 10 | 17 | 0  | 4  | 6  | 1  | 4  | 2  |
| Ccdc148   | -1.4013 | 2.7387 | 8.1601 | 0.0043 | 0.3886 | 10 | 20 | 12 | 9  | 2  | 6  | 0  | 5  | 1  | 5  |
| Thsd7a    | -1.379  | 6.8014 | 5.2283 | 0.0222 | 0.6995 | 15 | 0  | 0  | 1  | 2  | 0  | 0  | 0  | 1  | 5  |
| Tmc7      | -1.3736 | 2.2548 | 5.7551 | 0.0164 | 0.6292 | 3  | 4  | 3  | 19 | 4  | 4  | 3  | 2  | 0  | 3  |
| Gm33977   | -1.3656 | 0.5856 | 3.9192 | 0.0477 | 0.8678 | 8  | 15 | 13 | 11 | 11 | 4  | 0  | 8  | 3  | 5  |
| Gm33219   | -1.3641 | 1.1524 | 5.2762 | 0.0216 | 0.6958 | 3  | 19 | 11 | 39 | 10 | 2  | 13 | 6  | 1  | 10 |
| Lrp11     | -1.3529 | 5.6816 | 11.986 | 0.0005 | 0.151  | 12 | 21 | 5  | 11 | 0  | 0  | 2  | 4  | 4  | 7  |
| Shox2     | -1.3497 | 5.2686 | 9.4858 | 0.0021 | 0.2843 | 2  | 22 | 11 | 0  | 6  | 8  | 0  | 1  | 1  | 4  |
| Itih2     | -1.3475 | 2.139  | 4.1569 | 0.0415 | 0.8377 | 2  | 8  | 15 | 3  | 1  | 0  | 7  | 2  | 0  | 1  |
| Gm41491   | -1.3448 | 1.1396 | 5.77   | 0.0163 | 0.6285 | 9  | 38 | 8  | 15 | 4  | 5  | 8  | 9  | 0  | 4  |
| Chst1     | -1.3397 | 3.4798 | 4.4337 | 0.0352 | 0.8074 | 19 | 0  | 2  | 0  | 3  | 0  | 2  | 2  | 1  | 4  |
| Gm42259   | -1.3386 | 2.129  | 12.008 | 0.0005 | 0.151  | 16 | 36 | 24 | 33 | 11 | 9  | 9  | 11 | 6  | 7  |
| Gypc      | -1.3324 | 3.0201 | 5.1935 | 0.0227 | 0.7044 | 2  | 8  | 4  | 5  | 4  | 3  | 0  | 4  | 0  | 1  |
| C77370    | -1.3199 | 2.8271 | 7.8557 | 0.0051 | 0.4133 | 13 | 17 | 14 | 3  | 4  | 2  | 0  | 6  | 6  | 3  |
| Ap2a1     | -1.3196 | 1.4963 | 4.5182 | 0.0335 | 0.7919 | 6  | 13 | 9  | 2  | 10 | 0  | 10 | 1  | 1  | 4  |
| Cpb1      | -1.3163 | 1.6615 | 5.8729 | 0.0154 | 0.6181 | 10 | 12 | 4  | 8  | 9  | 0  | 8  | 2  | 1  | 6  |
| Sdpr      | -1.3161 | 3.9105 | 5.1489 | 0.0233 | 0.7084 | 33 | 2  | 2  | 9  | 1  | 8  | 1  | 4  | 0  | 5  |
| Ntn4      | -1.3033 | 0.7738 | 4.1254 | 0.0422 | 0.8429 | 6  | 15 | 9  | 10 | 9  | 0  | 0  | 5  | 7  | 4  |
| Eml1      | -1.2972 | 5.0709 | 6.9151 | 0.0085 | 0.5048 | 2  | 3  | 17 | 4  | 2  | 7  | 0  | 0  | 0  | 3  |
| Syt1      | -1.2968 | 7.4763 | 9.8543 | 0.0017 | 0.261  | 27 | 0  | 8  | 0  | 8  | 11 | 0  | 0  | 1  | 4  |
| Slc35g2   | -1.2959 | 2.5843 | 4.3615 | 0.0368 | 0.8127 | 4  | 11 | 1  | 7  | 0  | 0  | 0  | 3  | 0  | 5  |
| LOC102635 | -1.2931 | 1.7201 | 6.3724 | 0.0116 | 0.5577 | 10 | 25 | 17 | 26 | 5  | 5  | 4  | 5  | 4  | 11 |
| Foxp2     | -1.2873 | 3.4751 | 10.297 | 0.0013 | 0.2339 | 21 | 39 | 8  | 16 | 3  | 16 | 5  | 3  | 1  | 6  |
| Gm42339   | -1.2859 | 1.52   | 4.6952 | 0.0302 | 0.7699 | 4  | 11 | 22 | 12 | 4  | 3  | 0  | 11 | 0  | 5  |
| 9330104GC | -1.2795 | 2.0305 | 10.354 | 0.0013 | 0.2316 | 27 | 24 | 42 | 21 | 18 | 11 | 7  | 11 | 9  | 10 |
| Adams9    | -1.2752 | 2.3724 | 4.905  | 0.0268 | 0.7377 | 1  | 8  | 12 | 13 | 1  | 4  | 0  | 3  | 2  | 3  |
| Daam2     | -1.2749 | 4.0999 | 6.5999 | 0.0102 | 0.5433 | 2  | 7  | 6  | 6  | 9  | 0  | 0  | 4  | 5  | 2  |
| Pcsk4     | -1.2671 | 0.8916 | 6.1484 | 0.0132 | 0.5893 | 9  | 7  | 9  | 10 | 6  | 1  | 5  | 7  | 1  | 2  |
| Runx3     | -1.2658 | 3.8764 | 6.7987 | 0.0091 | 0.5176 | 14 | 16 | 3  | 2  | 0  | 1  | 9  | 1  | 1  | 1  |
| Gm35248   | -1.2583 | 1.4788 | 4.7778 | 0.0288 | 0.7543 | 24 | 36 | 45 | 12 | 3  | 9  | 2  | 19 | 3  | 8  |

|           |         |        |        |        |        |      |     |     |     |     |     |    |     |    |     |
|-----------|---------|--------|--------|--------|--------|------|-----|-----|-----|-----|-----|----|-----|----|-----|
| Hist1h2be | -1.2564 | 2.4234 | 6.9184 | 0.0085 | 0.5048 | 11   | 1   | 17  | 5   | 8   | 0   | 3  | 2   | 4  | 7   |
| Lzts1     | -1.2545 | 3.7029 | 4.033  | 0.0446 | 0.8574 | 2    | 12  | 2   | 0   | 1   | 0   | 0  | 0   | 2  | 4   |
| Scn2a1    | -1.2537 | 3.3964 | 3.9605 | 0.0466 | 0.8665 | 5    | 9   | 3   | 0   | 0   | 0   | 0  | 2   | 2  | 2   |
| BC068281  | -1.2513 | 3.279  | 12.471 | 0.0004 | 0.1332 | 20   | 39  | 50  | 21  | 7   | 7   | 3  | 18  | 11 | 8   |
| Kctd14    | -1.2488 | 1.0413 | 3.9318 | 0.0474 | 0.8678 | 5    | 6   | 7   | 3   | 4   | 1   | 1  | 3   | 3  | 1   |
| Lncpint   | -1.2475 | 2.2897 | 9.7687 | 0.0018 | 0.2615 | 23   | 24  | 43  | 43  | 16  | 8   | 6  | 25  | 4  | 15  |
| Dclk1     | -1.2442 | 6.2388 | 4.6393 | 0.0312 | 0.7726 | 11   | 2   | 5   | 0   | 1   | 0   | 3  | 0   | 2  | 2   |
| Gm7467    | -1.2408 | 1.141  | 4.1241 | 0.0423 | 0.8429 | 13   | 3   | 36  | 16  | 5   | 4   | 7  | 8   | 2  | 7   |
| Neur11a   | -1.2338 | 4.3001 | 4.376  | 0.0364 | 0.8112 | 6    | 6   | 4   | 1   | 2   | 2   | 0  | 0   | 1  | 4   |
| Adam19    | -1.2335 | 4.5072 | 5.2442 | 0.022  | 0.6995 | 6    | 6   | 9   | 1   | 2   | 0   | 3  | 2   | 0  | 4   |
| Zfp882    | -1.2284 | 2.1355 | 7.4121 | 0.0065 | 0.4561 | 13   | 30  | 15  | 7   | 5   | 4   | 8  | 5   | 3  | 6   |
| Gm16599   | -1.2246 | 1.2586 | 7.7575 | 0.0053 | 0.4269 | 16   | 19  | 26  | 28  | 14  | 7   | 15 | 7   | 4  | 9   |
| Gm40208   | -1.2229 | 1.9813 | 7.8662 | 0.005  | 0.4129 | 17   | 22  | 28  | 35  | 10  | 5   | 16 | 11  | 4  | 9   |
| Tspyl4    | -1.219  | 6.1723 | 13.19  | 0.0003 | 0.1101 | 17   | 30  | 19  | 14  | 8   | 10  | 5  | 9   | 1  | 9   |
| Car14     | -1.2144 | 2.3127 | 8.4795 | 0.0036 | 0.3649 | 8    | 21  | 14  | 16  | 9   | 5   | 12 | 2   | 3  | 5   |
| Mfsd7c    | -1.2143 | 1.476  | 8.1676 | 0.0043 | 0.3886 | 13   | 20  | 39  | 24  | 5   | 6   | 17 | 7   | 4  | 5   |
| BC031361  | -1.2127 | 1.3016 | 4.8273 | 0.028  | 0.7488 | 6    | 17  | 11  | 9   | 4   | 8   | 3  | 1   | 3  | 2   |
| 9430020K0 | -1.2123 | 4.6311 | 20.407 | 6E-06  | 0.0188 | 42   | 38  | 30  | 10  | 22  | 11  | 8  | 16  | 2  | 20  |
| Atp6v1g2  | -1.2091 | 5.9025 | 4.8917 | 0.027  | 0.7405 | 1    | 6   | 3   | 4   | 7   | 1   | 0  | 3   | 1  | 3   |
| Gdap1     | -1.2089 | 6.8363 | 3.8516 | 0.0497 | 0.8726 | 2    | 0   | 7   | 1   | 6   | 0   | 0  | 2   | 2  | 2   |
| Pou4f1    | -1.2015 | 7.2151 | 5.8445 | 0.0156 | 0.6238 | 1    | 5   | 11  | 5   | 4   | 5   | 0  | 2   | 0  | 3   |
| Gm12002   | -1.1994 | 0.8395 | 5.0461 | 0.0247 | 0.7214 | 10   | 18  | 13  | 13  | 2   | 1   | 2  | 5   | 5  | 7   |
| Ptgds     | -1.1962 | 10.453 | 6.9387 | 0.0084 | 0.5048 | 1095 | 307 | 324 | 279 | 100 | 442 | 87 | 183 | 19 | 145 |
| Ehhadh    | -1.1956 | 0.6562 | 4.0073 | 0.0453 | 0.8577 | 3    | 8   | 7   | 7   | 5   | 4   | 3  | 0   | 0  | 5   |
| Sel1l3    | -1.1935 | 4.134  | 12.131 | 0.0005 | 0.1486 | 14   | 24  | 20  | 8   | 6   | 9   | 1  | 0   | 1  | 17  |
| Itga7     | -1.1798 | 4.296  | 7.7221 | 0.0055 | 0.4316 | 0    | 11  | 16  | 6   | 10  | 1   | 2  | 2   | 3  | 9   |
| Rasip1    | -1.1735 | 2.8569 | 5.9909 | 0.0144 | 0.6045 | 16   | 14  | 2   | 6   | 1   | 2   | 12 | 0   | 1  | 1   |
| Gm32853   | -1.1721 | 1.39   | 5.8121 | 0.0159 | 0.6278 | 12   | 41  | 20  | 28  | 7   | 11  | 19 | 9   | 0  | 6   |
| Aldh18a1  | -1.167  | 2.2898 | 7.0943 | 0.0077 | 0.4918 | 7    | 22  | 5   | 10  | 9   | 8   | 2  | 2   | 3  | 6   |
| Lenep     | -1.1618 | 3.2414 | 7.3433 | 0.0067 | 0.4636 | 159  | 44  | 32  | 33  | 19  | 18  | 57 | 25  | 9  | 22  |
| Spata33   | -1.1596 | 2.7103 | 6.8434 | 0.0089 | 0.5138 | 10   | 6   | 10  | 10  | 6   | 5   | 0  | 4   | 2  | 6   |
| Fsd1l     | -1.1593 | 4.6429 | 9.3754 | 0.0022 | 0.2963 | 12   | 8   | 13  | 6   | 10  | 7   | 7  | 1   | 3  | 2   |
| Dnd1      | -1.1531 | 1.6765 | 6.5788 | 0.0103 | 0.5435 | 13   | 17  | 24  | 14  | 10  | 5   | 1  | 11  | 1  | 14  |
| Gm9833    | -1.1474 | 1.7026 | 5.7145 | 0.0168 | 0.6337 | 9    | 27  | 31  | 14  | 11  | 13  | 0  | 14  | 2  | 7   |
| Thy1      | -1.147  | 8.4865 | 5.0166 | 0.0251 | 0.7232 | 10   | 10  | 0   | 0   | 5   | 1   | 0  | 0   | 3  | 6   |
| H19       | -1.1427 | 3.8566 | 6.7668 | 0.0093 | 0.5212 | 16   | 23  | 11  | 2   | 5   | 4   | 9  | 3   | 3  | 4   |
| Snhg14    | -1.1418 | 4.4438 | 5.9507 | 0.0147 | 0.6067 | 2    | 20  | 8   | 6   | 0   | 0   | 0  | 10  | 1  | 3   |
| Bnc2      | -1.1374 | 4.7239 | 11.286 | 0.0008 | 0.1801 | 22   | 13  | 9   | 11  | 10  | 4   | 0  | 9   | 4  | 10  |
| Gadd45g   | -1.1293 | 3.5516 | 10.486 | 0.0012 | 0.2302 | 27   | 61  | 41  | 23  | 22  | 12  | 3  | 20  | 9  | 25  |
| Rgs4      | -1.1281 | 8.7798 | 4.1493 | 0.0417 | 0.8381 | 5    | 2   | 10  | 0   | 3   | 2   | 0  | 0   | 4  | 2   |
| Rn7sk     | -1.1227 | 1.7904 | 4.0541 | 0.0441 | 0.8533 | 17   | 16  | 20  | 34  | 8   | 18  | 6  | 8   | 4  | 3   |
| Ciart     | -1.1218 | 1.9202 | 6.4739 | 0.0109 | 0.5486 | 8    | 42  | 33  | 18  | 16  | 7   | 26 | 9   | 1  | 9   |
| Dtwd2     | -1.1156 | 1.9243 | 4.478  | 0.0343 | 0.7996 | 14   | 23  | 6   | 21  | 4   | 4   | 9  | 2   | 4  | 9   |
| Nap1l5    | -1.0979 | 7.2485 | 8.6127 | 0.0033 | 0.3491 | 5    | 10  | 16  | 14  | 3   | 4   | 0  | 0   | 7  | 9   |
| Snap25    | -1.0901 | 8.9819 | 4.9137 | 0.0266 | 0.7377 | 11   | 6   | 0   | 0   | 9   | 1   | 0  | 0   | 2  | 8   |
| Slc29a2   | -1.0899 | 2.8158 | 9.581  | 0.002  | 0.2774 | 13   | 26  | 20  | 12  | 2   | 12  | 8  | 3   | 4  | 3   |
| Nap1l3    | -1.0867 | 4.6919 | 10.892 | 0.001  | 0.1957 | 22   | 28  | 17  | 11  | 3   | 3   | 9  | 7   | 5  | 10  |
| Grin1     | -1.0735 | 2.7471 | 4.3543 | 0.0369 | 0.8131 | 8    | 7   | 28  | 5   | 1   | 5   | 0  | 6   | 3  | 5   |
| Gm41461   | -1.0677 | 1.3962 | 4.1326 | 0.0421 | 0.8426 | 20   | 28  | 21  | 12  | 14  | 15  | 0  | 15  | 4  | 6   |
| Gap43     | -1.0635 | 7.4252 | 13.016 | 0.0003 | 0.1116 | 22   | 22  | 43  | 6   | 11  | 11  | 8  | 18  | 2  | 6   |
| Traip     | -1.0564 | 1.7734 | 7.4287 | 0.0064 | 0.4537 | 22   | 24  | 32  | 22  | 9   | 16  | 4  | 16  | 2  | 9   |
| Cdk5r1    | -1.0547 | 6.1828 | 12.445 | 0.0004 | 0.1332 | 9    | 15  | 43  | 16  | 2   | 7   | 2  | 7   | 9  | 11  |
| Usp13     | -1.0508 | 5.8336 | 9.4438 | 0.0021 | 0.2865 | 16   | 11  | 24  | 4   | 5   | 9   | 1  | 2   | 3  | 11  |
| Fndc1     | -1.0383 | 2.2938 | 6.3802 | 0.0115 | 0.5577 | 69   | 17  | 56  | 34  | 31  | 21  | 18 | 22  | 6  | 33  |
| Zfp780b   | -1.038  | 2.8467 | 9.9191 | 0.0016 | 0.2581 | 16   | 42  | 50  | 43  | 13  | 7   | 7  | 19  | 18 | 15  |
| Tmem150c  | -1.0367 | 4.8035 | 7.0807 | 0.0078 | 0.4918 | 7    | 11  | 7   | 10  | 10  | 2   | 0  | 11  | 2  | 5   |
| Gm9222    | -1.0363 | 2.5435 | 8.1519 | 0.0043 | 0.3888 | 20   | 25  | 15  | 16  | 9   | 5   | 21 | 5   | 4  | 4   |
| Adhfe1    | -1.033  | 1.0914 | 5.7216 | 0.0168 | 0.6337 | 6    | 10  | 12  | 13  | 3   | 4   | 3  | 5   | 4  | 3   |
| Slc24a2   | -1.0252 | 7.735  | 12.302 | 0.0005 | 0.1416 | 10   | 20  | 27  | 24  | 8   | 14  | 0  | 7   | 8  | 10  |
| Rab36     | -1.0252 | 3.0469 | 5.7896 | 0.0161 | 0.6285 | 13   | 9   | 23  | 7   | 4   | 2   | 3  | 10  | 5  | 4   |
| Gm39656   | -1.0165 | 1.8931 | 4.646  | 0.0311 | 0.7726 | 11   | 26  | 14  | 22  | 16  | 4   | 9  | 18  | 4  | 7   |
| Gm30294   | -1.0155 | 1.9903 | 4.4964 | 0.034  | 0.7963 | 32   | 45  | 35  | 29  | 16  | 15  | 9  | 23  | 15 | 2   |

|                  |         |        |        |        |        |     |     |    |     |    |    |     |    |    |    |
|------------------|---------|--------|--------|--------|--------|-----|-----|----|-----|----|----|-----|----|----|----|
| <b>Mmd</b>       | -1.014  | 2.7338 | 5.1441 | 0.0233 | 0.7084 | 25  | 20  | 48 | 11  | 1  | 2  | 5   | 7  | 8  | 20 |
| <b>Brsk1</b>     | -1.0089 | 5.979  | 3.9739 | 0.0462 | 0.8611 | 5   | 10  | 5  | 2   | 3  | 6  | 0   | 0  | 0  | 5  |
| <b>Garnl3</b>    | -1.0066 | 4.2538 | 6.4963 | 0.0108 | 0.5486 | 12  | 30  | 4  | 8   | 0  | 5  | 0   | 2  | 4  | 12 |
| <b>Wipf3</b>     | -1.006  | 6.7265 | 13.019 | 0.0003 | 0.1116 | 27  | 19  | 26 | 11  | 7  | 15 | 10  | 11 | 0  | 5  |
| <b>Faim2</b>     | -1      | 6.0903 | 5.0836 | 0.0242 | 0.7184 | 4   | 16  | 5  | 0   | 8  | 2  | 9   | 0  | 0  | 4  |
| <b>Bbs12</b>     | -0.9951 | 1.7508 | 5.8154 | 0.0159 | 0.6274 | 13  | 23  | 25 | 23  | 2  | 7  | 13  | 7  | 4  | 7  |
| <b>Brsk2</b>     | -0.9936 | 5.7935 | 4.6702 | 0.0307 | 0.772  | 12  | 7   | 9  | 0   | 1  | 0  | 0   | 9  | 2  | 2  |
| <b>Sdc3</b>      | -0.9887 | 5.0655 | 8.5345 | 0.0035 | 0.3582 | 18  | 13  | 14 | 11  | 3  | 8  | 4   | 9  | 1  | 5  |
| <b>Ankrd6</b>    | -0.9859 | 3.4565 | 5.6393 | 0.0176 | 0.6392 | 17  | 7   | 23 | 6   | 3  | 3  | 7   | 13 | 0  | 3  |
| <b>Tmem120k</b>  | -0.9856 | 2.6614 | 6.3562 | 0.0117 | 0.5582 | 8   | 21  | 13 | 5   | 6  | 10 | 7   | 2  | 1  | 4  |
| <b>Kcnu1</b>     | -0.9853 | 2.211  | 4.0314 | 0.0447 | 0.8574 | 14  | 10  | 14 | 9   | 18 | 4  | 5   | 10 | 0  | 15 |
| <b>Tle6</b>      | -0.9842 | 1.99   | 4.8156 | 0.0282 | 0.7493 | 13  | 30  | 16 | 28  | 9  | 1  | 6   | 17 | 4  | 16 |
| <b>170001011</b> | -0.9704 | 1.3925 | 4.9513 | 0.0261 | 0.7335 | 29  | 25  | 30 | 32  | 17 | 10 | 3   | 27 | 7  | 15 |
| <b>Helq</b>      | -0.9663 | 1.8192 | 7.2424 | 0.0071 | 0.4752 | 18  | 20  | 17 | 15  | 13 | 8  | 2   | 10 | 8  | 10 |
| <b>Mtfp1</b>     | -0.9657 | 3.1889 | 6.7211 | 0.0095 | 0.525  | 12  | 24  | 17 | 3   | 7  | 4  | 8   | 5  | 2  | 10 |
| <b>Nefm</b>      | -0.9619 | 11.857 | 5.3375 | 0.0209 | 0.6908 | 52  | 14  | 11 | 11  | 34 | 8  | 6   | 2  | 20 | 22 |
| <b>Gm41287</b>   | -0.9582 | 2.1376 | 3.9287 | 0.0475 | 0.8678 | 18  | 48  | 59 | 30  | 9  | 20 | 0   | 34 | 8  | 6  |
| <b>Slbp</b>      | -0.957  | 1.6303 | 4.4602 | 0.0347 | 0.8027 | 12  | 32  | 32 | 14  | 9  | 4  | 16  | 8  | 8  | 8  |
| <b>Gm5093</b>    | -0.9554 | 4.7629 | 4.1987 | 0.0405 | 0.8329 | 3   | 6   | 10 | 3   | 6  | 3  | 4   | 4  | 1  | 1  |
| <b>Mecom</b>     | -0.9534 | 2.0887 | 6.0556 | 0.0139 | 0.6019 | 39  | 49  | 36 | 17  | 26 | 28 | 9   | 27 | 3  | 14 |
| <b>Nckap5</b>    | -0.9533 | 1.7547 | 4.574  | 0.0325 | 0.7827 | 9   | 13  | 41 | 15  | 14 | 6  | 22  | 12 | 3  | 3  |
| <b>Tox3</b>      | -0.9481 | 4.3727 | 5.0811 | 0.0242 | 0.7184 | 23  | 9   | 7  | 5   | 1  | 8  | 0   | 2  | 1  | 10 |
| <b>Hap1</b>      | -0.9444 | 2.3473 | 5.4821 | 0.0192 | 0.6697 | 7   | 20  | 22 | 13  | 6  | 7  | 7   | 11 | 0  | 7  |
| <b>LOC108165</b> | -0.9418 | 1.4537 | 4.2116 | 0.0401 | 0.8291 | 7   | 45  | 30 | 21  | 14 | 16 | 12  | 11 | 2  | 14 |
| <b>LOC108165</b> | -0.9392 | 2.2614 | 3.9705 | 0.0463 | 0.8618 | 15  | 21  | 16 | 14  | 10 | 7  | 6   | 9  | 4  | 10 |
| <b>Nudt12</b>    | -0.9379 | 3.5701 | 9.1342 | 0.0025 | 0.3165 | 35  | 39  | 45 | 38  | 16 | 29 | 7   | 8  | 13 | 21 |
| <b>Fgf18</b>     | -0.935  | 4.6327 | 7.0529 | 0.0079 | 0.4954 | 17  | 19  | 31 | 8   | 7  | 4  | 3   | 21 | 4  | 6  |
| <b>LOC108165</b> | -0.9349 | 2.3085 | 6.8048 | 0.0091 | 0.5175 | 28  | 64  | 66 | 49  | 25 | 14 | 45  | 44 | 5  | 9  |
| <b>Areg</b>      | -0.9188 | 2.4425 | 3.8441 | 0.0499 | 0.8743 | 62  | 65  | 49 | 57  | 8  | 24 | 12  | 24 | 14 | 33 |
| <b>Ank2</b>      | -0.9169 | 8.7876 | 5.964  | 0.0146 | 0.6057 | 22  | 4   | 16 | 0   | 4  | 3  | 1   | 3  | 5  | 10 |
| <b>Dennd2a</b>   | -0.909  | 3.0007 | 6.5441 | 0.0105 | 0.5456 | 6   | 19  | 22 | 12  | 12 | 6  | 1   | 7  | 10 | 9  |
| <b>Dennd4b</b>   | -0.9081 | 3.4422 | 7.9655 | 0.0048 | 0.4019 | 9   | 35  | 29 | 18  | 7  | 14 | 11  | 7  | 4  | 10 |
| <b>Cep192</b>    | -0.908  | 2.562  | 8.0513 | 0.0045 | 0.3978 | 43  | 62  | 47 | 43  | 30 | 11 | 27  | 19 | 19 | 32 |
| <b>Gm15764</b>   | -0.9031 | 3.2401 | 4.7437 | 0.0294 | 0.7606 | 43  | 138 | 99 | 104 | 28 | 9  | 100 | 60 | 15 | 25 |
| <b>Basp1</b>     | -0.8958 | 8.5415 | 7.8042 | 0.0052 | 0.4214 | 118 | 35  | 32 | 24  | 13 | 9  | 48  | 37 | 6  | 20 |
| <b>Plxnd1</b>    | -0.8927 | 4.5633 | 5.7224 | 0.0167 | 0.6337 | 20  | 10  | 10 | 0   | 11 | 6  | 5   | 1  | 8  | 5  |
| <b>Entpd3</b>    | -0.8907 | 6.2468 | 15.651 | 8E-05  | 0.055  | 16  | 67  | 90 | 69  | 15 | 23 | 36  | 39 | 6  | 21 |
| <b>Mobp</b>      | -0.8897 | 6.4906 | 7.4783 | 0.0062 | 0.4459 | 7   | 17  | 19 | 34  | 16 | 8  | 10  | 11 | 1  | 18 |
| <b>Gm30189</b>   | -0.8838 | 2.1034 | 4.3442 | 0.0371 | 0.8131 | 21  | 24  | 45 | 26  | 8  | 5  | 8   | 20 | 12 | 11 |
| <b>Zbtb39</b>    | -0.8836 | 2.6453 | 4.3866 | 0.0362 | 0.811  | 36  | 37  | 65 | 62  | 16 | 27 | 15  | 25 | 10 | 27 |
| <b>Fam13a</b>    | -0.8835 | 4.1503 | 5.4664 | 0.0194 | 0.6697 | 34  | 30  | 16 | 17  | 2  | 24 | 0   | 18 | 1  | 4  |
| <b>Pacsin1</b>   | -0.8811 | 7.2714 | 4.4434 | 0.035  | 0.8062 | 10  | 11  | 8  | 6   | 2  | 2  | 0   | 8  | 2  | 6  |
| <b>Hspb6</b>     | -0.8774 | 3.719  | 8.2584 | 0.0041 | 0.382  | 46  | 66  | 33 | 41  | 14 | 29 | 27  | 12 | 9  | 21 |
| <b>Zfp956</b>    | -0.8742 | 2.6371 | 4.8222 | 0.0281 | 0.7493 | 29  | 45  | 46 | 34  | 6  | 19 | 10  | 39 | 1  | 9  |
| <b>Ksr2</b>      | -0.8711 | 4.0328 | 4.302  | 0.0381 | 0.8131 | 5   | 18  | 10 | 2   | 5  | 0  | 0   | 3  | 7  | 9  |
| <b>Arhgap33</b>  | -0.8711 | 2.8805 | 4.9665 | 0.0258 | 0.7335 | 14  | 24  | 41 | 26  | 9  | 14 | 17  | 21 | 3  | 2  |
| <b>Rfx3</b>      | -0.8698 | 2.9198 | 9.0597 | 0.0026 | 0.3187 | 21  | 34  | 52 | 34  | 24 | 12 | 31  | 23 | 3  | 18 |
| <b>LOC105245</b> | -0.869  | 2.986  | 4.408  | 0.0358 | 0.811  | 45  | 99  | 84 | 66  | 37 | 17 | 57  | 68 | 9  | 24 |
| <b>Klf12</b>     | -0.8635 | 3.7517 | 5.8071 | 0.016  | 0.628  | 12  | 17  | 12 | 22  | 1  | 10 | 7   | 12 | 0  | 3  |
| <b>Gm36800</b>   | -0.8555 | 2.6617 | 7.7179 | 0.0055 | 0.4316 | 51  | 61  | 51 | 73  | 20 | 26 | 41  | 28 | 13 | 23 |
| <b>Pros1</b>     | -0.8549 | 3.1307 | 4.1076 | 0.0427 | 0.8447 | 12  | 5   | 10 | 12  | 7  | 5  | 10  | 2  | 3  | 4  |
| <b>Spire2</b>    | -0.8494 | 5.2591 | 11.066 | 0.0009 | 0.1883 | 17  | 83  | 48 | 36  | 14 | 16 | 24  | 18 | 17 | 19 |
| <b>Amigo1</b>    | -0.8436 | 5.0186 | 14.339 | 0.0002 | 0.0808 | 32  | 67  | 27 | 35  | 15 | 24 | 17  | 24 | 5  | 19 |
| <b>Gm40475</b>   | -0.84   | 1.9756 | 3.8923 | 0.0485 | 0.8678 | 17  | 50  | 44 | 32  | 23 | 17 | 29  | 22 | 4  | 17 |
| <b>Rimbp2</b>    | -0.8363 | 4.6176 | 5.7948 | 0.0161 | 0.6285 | 9   | 6   | 14 | 11  | 14 | 6  | 7   | 3  | 4  | 8  |
| <b>Arhgef39</b>  | -0.835  | 1.8415 | 4.9503 | 0.0261 | 0.7335 | 33  | 37  | 31 | 27  | 12 | 23 | 6   | 17 | 3  | 22 |
| <b>Nog</b>       | -0.8348 | 2.2708 | 4.3659 | 0.0367 | 0.8126 | 11  | 18  | 19 | 3   | 9  | 8  | 10  | 5  | 1  | 7  |
| <b>Scn7a</b>     | -0.8331 | 7.9336 | 4.2831 | 0.0385 | 0.8177 | 1   | 8   | 9  | 8   | 11 | 0  | 9   | 3  | 4  | 3  |
| <b>LOC108165</b> | -0.8307 | 2.8808 | 6.7578 | 0.0093 | 0.5214 | 31  | 57  | 38 | 50  | 18 | 10 | 18  | 40 | 8  | 24 |
| <b>Gm9769</b>    | -0.8306 | 2.5472 | 7.1667 | 0.0074 | 0.4832 | 42  | 39  | 37 | 22  | 12 | 22 | 19  | 8  | 8  | 20 |
| <b>Hcar1</b>     | -0.8279 | 2.0604 | 5.7156 | 0.0168 | 0.6337 | 40  | 32  | 53 | 33  | 14 | 19 | 19  | 21 | 8  | 21 |
| <b>Gm17296</b>   | -0.8268 | 2.0213 | 4.4076 | 0.0358 | 0.811  | 17  | 25  | 9  | 23  | 10 | 12 | 5   | 12 | 5  | 9  |

|                  |         |        |        |        |        |     |     |     |     |    |     |    |    |    |    |
|------------------|---------|--------|--------|--------|--------|-----|-----|-----|-----|----|-----|----|----|----|----|
| <b>Rsph9</b>     | -0.8215 | 2.8757 | 5.6955 | 0.017  | 0.6337 | 16  | 18  | 20  | 17  | 11 | 2   | 17 | 9  | 3  | 13 |
| <b>Caprin2</b>   | -0.8183 | 3.8252 | 7.4232 | 0.0064 | 0.4542 | 23  | 43  | 42  | 33  | 15 | 1   | 24 | 31 | 9  | 16 |
| <b>Cpne2</b>     | -0.8126 | 4.3458 | 6.9966 | 0.0082 | 0.4992 | 19  | 30  | 10  | 17  | 10 | 12  | 11 | 7  | 3  | 12 |
| <b>Cntnap1</b>   | -0.809  | 5.038  | 4.1772 | 0.041  | 0.8351 | 0   | 27  | 6   | 4   | 5  | 2   | 3  | 3  | 7  | 6  |
| <b>Zfp958</b>    | -0.8063 | 3.1404 | 5.048  | 0.0247 | 0.7214 | 40  | 44  | 37  | 48  | 29 | 18  | 3  | 18 | 11 | 54 |
| <b>Gm35290</b>   | -0.8039 | 2.145  | 4.3378 | 0.0373 | 0.8131 | 28  | 44  | 65  | 31  | 5  | 9   | 14 | 34 | 7  | 21 |
| <b>Gm33585</b>   | -0.8006 | 2.755  | 6.5905 | 0.0103 | 0.5434 | 46  | 69  | 45  | 47  | 38 | 24  | 51 | 37 | 5  | 24 |
| <b>Cep170</b>    | -0.8001 | 5.4385 | 4.1599 | 0.0414 | 0.8377 | 2   | 19  | 9   | 13  | 4  | 3   | 9  | 2  | 6  | 4  |
| <b>LOC108168</b> | -0.7927 | 1.476  | 4.0272 | 0.0448 | 0.8574 | 22  | 22  | 19  | 28  | 7  | 10  | 12 | 11 | 7  | 11 |
| <b>Slx1b</b>     | -0.7914 | 2.8526 | 4.628  | 0.0315 | 0.7737 | 20  | 34  | 45  | 16  | 25 | 17  | 41 | 11 | 1  | 12 |
| <b>Syt3</b>      | -0.7903 | 5.2721 | 8.9406 | 0.0028 | 0.3247 | 22  | 40  | 68  | 30  | 13 | 29  | 11 | 32 | 3  | 14 |
| <b>Tmtc1</b>     | -0.7865 | 6.2103 | 4.3965 | 0.036  | 0.811  | 14  | 15  | 12  | 0   | 1  | 7   | 4  | 5  | 0  | 6  |
| <b>Ppp1r9a</b>   | -0.7734 | 6.1476 | 9.7078 | 0.0018 | 0.2651 | 19  | 34  | 32  | 20  | 7  | 11  | 9  | 10 | 8  | 21 |
| <b>Kcnb1</b>     | -0.7692 | 6.6657 | 6.6092 | 0.0101 | 0.543  | 41  | 13  | 19  | 10  | 3  | 11  | 14 | 7  | 1  | 14 |
| <b>Psme2b</b>    | -0.7682 | 1.7812 | 4.5663 | 0.0326 | 0.7847 | 19  | 41  | 44  | 26  | 24 | 17  | 38 | 15 | 9  | 7  |
| <b>Akap5</b>     | -0.7642 | 6.473  | 6.7594 | 0.0093 | 0.5214 | 19  | 24  | 29  | 9   | 7  | 1   | 7  | 16 | 11 | 11 |
| <b>Aff3</b>      | -0.7639 | 5.053  | 7.8657 | 0.005  | 0.4129 | 79  | 30  | 24  | 42  | 22 | 21  | 31 | 29 | 10 | 22 |
| <b>Plekho1</b>   | -0.7618 | 4.6019 | 5.9392 | 0.0148 | 0.6085 | 31  | 23  | 40  | 19  | 9  | 14  | 11 | 10 | 5  | 25 |
| <b>Eml5</b>      | -0.7571 | 3.8596 | 8.0386 | 0.0046 | 0.3979 | 61  | 121 | 73  | 64  | 27 | 27  | 33 | 72 | 18 | 31 |
| <b>Gm31262</b>   | -0.7563 | 2.6822 | 8.6983 | 0.0032 | 0.341  | 56  | 64  | 63  | 46  | 34 | 31  | 44 | 30 | 12 | 30 |
| <b>Hhip</b>      | -0.7488 | 2.6527 | 5.8841 | 0.0153 | 0.6176 | 17  | 57  | 70  | 36  | 23 | 29  | 19 | 21 | 11 | 26 |
| <b>Kctd4</b>     | -0.7461 | 2.796  | 4.0479 | 0.0442 | 0.8549 | 13  | 31  | 26  | 30  | 23 | 8   | 18 | 34 | 6  | 5  |
| <b>AK010878</b>  | -0.7452 | 2.0426 | 3.9062 | 0.0481 | 0.8678 | 16  | 25  | 16  | 13  | 13 | 14  | 4  | 6  | 4  | 17 |
| <b>Cnbd2</b>     | -0.7436 | 2.1819 | 3.9578 | 0.0467 | 0.8665 | 17  | 33  | 38  | 20  | 9  | 12  | 30 | 9  | 1  | 14 |
| <b>Zfp719</b>    | -0.7401 | 3.1455 | 6.7072 | 0.0096 | 0.525  | 54  | 54  | 39  | 29  | 26 | 24  | 35 | 27 | 11 | 17 |
| <b>Gpr153</b>    | -0.7333 | 4.3349 | 6.2992 | 0.0121 | 0.5668 | 34  | 73  | 69  | 37  | 12 | 22  | 23 | 40 | 7  | 27 |
| <b>LOC105245</b> | -0.7302 | 2.77   | 4.8994 | 0.0269 | 0.7395 | 27  | 74  | 54  | 76  | 23 | 21  | 50 | 36 | 7  | 32 |
| <b>Nkd2</b>      | -0.7273 | 2.7648 | 4.4786 | 0.0343 | 0.7996 | 41  | 24  | 50  | 27  | 15 | 21  | 18 | 17 | 10 | 20 |
| <b>Sestd1</b>    | -0.7149 | 5.4625 | 11.018 | 0.0009 | 0.1888 | 28  | 68  | 59  | 29  | 31 | 18  | 18 | 42 | 15 | 25 |
| <b>Pcgf6</b>     | -0.7056 | 2.9195 | 6.0023 | 0.0143 | 0.604  | 33  | 51  | 48  | 61  | 27 | 24  | 18 | 22 | 16 | 42 |
| <b>2410131K1</b> | -0.6999 | 3.1146 | 5.1176 | 0.0237 | 0.7136 | 22  | 27  | 30  | 25  | 19 | 18  | 11 | 22 | 4  | 16 |
| <b>Dtd2</b>      | -0.6974 | 3.0578 | 4.9809 | 0.0256 | 0.7319 | 41  | 60  | 61  | 54  | 38 | 32  | 28 | 27 | 21 | 34 |
| <b>Tceal1</b>    | -0.6966 | 3.9354 | 5.0933 | 0.024  | 0.7183 | 19  | 33  | 14  | 25  | 0  | 8   | 20 | 7  | 3  | 13 |
| <b>Crtc3</b>     | -0.6928 | 4.5499 | 17.581 | 3E-05  | 0.0381 | 88  | 143 | 125 | 91  | 46 | 50  | 52 | 63 | 34 | 73 |
| <b>Med12l</b>    | -0.6928 | 3.7217 | 4.0357 | 0.0445 | 0.8574 | 30  | 34  | 23  | 17  | 3  | 6   | 10 | 18 | 10 | 13 |
| <b>Peg3</b>      | -0.6905 | 6.9062 | 8.7256 | 0.0031 | 0.3385 | 25  | 100 | 110 | 62  | 35 | 23  | 54 | 51 | 25 | 29 |
| <b>Nav2</b>      | -0.689  | 3.515  | 5.2803 | 0.0216 | 0.6958 | 51  | 33  | 41  | 54  | 18 | 24  | 21 | 25 | 8  | 37 |
| <b>Nrbp1</b>     | -0.6875 | 4.0498 | 9.5063 | 0.002  | 0.2825 | 57  | 107 | 107 | 63  | 48 | 33  | 76 | 46 | 37 | 21 |
| <b>Kcnd3</b>     | -0.6869 | 4.1181 | 4.7881 | 0.0287 | 0.7541 | 24  | 39  | 18  | 15  | 5  | 16  | 0  | 16 | 3  | 20 |
| <b>Masp1</b>     | -0.6811 | 2.9989 | 6.5675 | 0.0104 | 0.5447 | 35  | 40  | 78  | 39  | 19 | 25  | 26 | 25 | 10 | 33 |
| <b>Pde1c</b>     | -0.6807 | 5.5927 | 6.109  | 0.0134 | 0.5959 | 11  | 23  | 36  | 29  | 6  | 29  | 5  | 9  | 6  | 9  |
| <b>Ppp2r2b</b>   | -0.6798 | 6.9679 | 8.4365 | 0.0037 | 0.3685 | 29  | 33  | 34  | 14  | 16 | 19  | 15 | 9  | 6  | 23 |
| <b>Supt4a</b>    | -0.674  | 2.8922 | 3.8955 | 0.0484 | 0.8678 | 19  | 47  | 45  | 13  | 25 | 14  | 3  | 27 | 13 | 24 |
| <b>Dock8</b>     | -0.6712 | 3.0642 | 4.8329 | 0.0279 | 0.7488 | 49  | 74  | 81  | 37  | 41 | 17  | 54 | 29 | 25 | 37 |
| <b>Zdhhc17</b>   | -0.6699 | 5.1857 | 8.7524 | 0.0031 | 0.3382 | 25  | 43  | 27  | 39  | 7  | 22  | 8  | 24 | 7  | 19 |
| <b>Gm32394</b>   | -0.6698 | 2.3389 | 3.8789 | 0.0489 | 0.8696 | 26  | 53  | 55  | 42  | 25 | 10  | 41 | 47 | 10 | 12 |
| <b>Igf2</b>      | -0.6658 | 5.5559 | 7.8447 | 0.0051 | 0.4149 | 104 | 114 | 131 | 79  | 70 | 65  | 86 | 60 | 39 | 40 |
| <b>Pigg</b>      | -0.6603 | 3.1388 | 4.6421 | 0.0312 | 0.7726 | 39  | 56  | 66  | 70  | 41 | 31  | 30 | 14 | 28 | 51 |
| <b>Cdc42ep2</b>  | -0.6596 | 4.6098 | 4.3698 | 0.0366 | 0.8119 | 12  | 11  | 20  | 22  | 5  | 12  | 13 | 10 | 1  | 5  |
| <b>Car6</b>      | -0.6594 | 2.1035 | 4.0294 | 0.0447 | 0.8574 | 50  | 52  | 59  | 38  | 29 | 42  | 33 | 25 | 12 | 22 |
| <b>Klhl13</b>    | -0.6505 | 4.0357 | 4.2379 | 0.0395 | 0.823  | 7   | 22  | 16  | 22  | 3  | 14  | 5  | 11 | 3  | 7  |
| <b>Kctd18</b>    | -0.65   | 2.8387 | 4.6088 | 0.0318 | 0.7776 | 27  | 72  | 43  | 37  | 11 | 20  | 16 | 32 | 7  | 31 |
| <b>Cplx2</b>     | -0.6486 | 6.2204 | 7.0547 | 0.0079 | 0.4954 | 23  | 27  | 28  | 15  | 18 | 8   | 16 | 21 | 11 | 9  |
| <b>Dbf4</b>      | -0.6472 | 3.3849 | 3.8962 | 0.0484 | 0.8678 | 97  | 177 | 92  | 94  | 38 | 104 | 35 | 46 | 34 | 47 |
| <b>Tnfrsf11b</b> | -0.6436 | 1.7385 | 3.9937 | 0.0457 | 0.8598 | 31  | 39  | 32  | 30  | 19 | 18  | 21 | 18 | 8  | 25 |
| <b>Pom121</b>    | -0.6419 | 3.6074 | 4.3876 | 0.0362 | 0.811  | 44  | 82  | 63  | 59  | 62 | 46  | 20 | 41 | 34 | 36 |
| <b>Uhrf1bp1</b>  | -0.6362 | 3.7675 | 7.6038 | 0.0058 | 0.4375 | 104 | 66  | 96  | 107 | 28 | 51  | 78 | 39 | 26 | 46 |
| <b>Dclre1c</b>   | -0.6336 | 3.368  | 4.7607 | 0.0291 | 0.7563 | 26  | 55  | 61  | 31  | 7  | 20  | 30 | 20 | 3  | 31 |
| <b>Msrb3</b>     | -0.6303 | 3.0538 | 4.5862 | 0.0322 | 0.7798 | 29  | 33  | 39  | 28  | 13 | 9   | 26 | 27 | 2  | 23 |
| <b>Zfp941</b>    | -0.6298 | 3.5148 | 4.4753 | 0.0344 | 0.8002 | 24  | 43  | 20  | 26  | 20 | 13  | 15 | 26 | 10 | 15 |
| <b>Poli</b>      | -0.6217 | 3.0469 | 4.9978 | 0.0254 | 0.7274 | 31  | 93  | 62  | 35  | 34 | 18  | 48 | 34 | 23 | 25 |
| <b>Zfp472</b>    | -0.621  | 3.2336 | 5.2894 | 0.0215 | 0.6958 | 98  | 63  | 124 | 77  | 40 | 49  | 51 | 57 | 22 | 63 |



|                  |         |        |        |        |        |     |      |      |     |     |     |     |     |     |     |
|------------------|---------|--------|--------|--------|--------|-----|------|------|-----|-----|-----|-----|-----|-----|-----|
| <b>Zmat1</b>     | -0.6209 | 4.0196 | 4.7074 | 0.03   | 0.7694 | 37  | 49   | 20   | 28  | 43  | 32  | 29  | 22  | 16  | 12  |
| <b>Mef2c</b>     | -0.6196 | 6.143  | 4.0057 | 0.0453 | 0.8577 | 38  | 24   | 16   | 5   | 4   | 6   | 18  | 12  | 6   | 10  |
| <b>Zfp72</b>     | -0.616  | 2.9371 | 4.824  | 0.0281 | 0.7493 | 33  | 52   | 59   | 28  | 13  | 26  | 29  | 25  | 6   | 23  |
| <b>Acta2</b>     | -0.615  | 3.2312 | 4.0378 | 0.0445 | 0.8569 | 92  | 80   | 64   | 46  | 26  | 44  | 52  | 40  | 21  | 26  |
| <b>Pprc1</b>     | -0.6134 | 3.1335 | 4.7831 | 0.0287 | 0.7541 | 42  | 52   | 82   | 46  | 18  | 33  | 42  | 20  | 10  | 38  |
| <b>Vit</b>       | -0.6107 | 4.537  | 4.3236 | 0.0376 | 0.8131 | 77  | 48   | 49   | 43  | 27  | 44  | 68  | 30  | 8   | 9   |
| <b>Cenpj</b>     | -0.6102 | 3.8543 | 5.4284 | 0.0198 | 0.6761 | 92  | 105  | 98   | 82  | 54  | 76  | 44  | 51  | 35  | 46  |
| <b>Rab23</b>     | -0.6062 | 3.0277 | 4.5428 | 0.0331 | 0.7855 | 41  | 53   | 41   | 30  | 30  | 13  | 17  | 30  | 23  | 31  |
| <b>Myadm</b>     | -0.6043 | 5.594  | 15.956 | 6E-05  | 0.053  | 110 | 162  | 199  | 138 | 56  | 101 | 120 | 82  | 41  | 52  |
| <b>Kcnq1ot1</b>  | -0.6037 | 7.0778 | 7.7246 | 0.0054 | 0.4316 | 637 | 1057 | 1134 | 853 | 453 | 375 | 755 | 693 | 309 | 336 |
| <b>B4galt4</b>   | -0.6025 | 2.9845 | 4.9613 | 0.0259 | 0.7335 | 23  | 45   | 34   | 30  | 11  | 22  | 23  | 15  | 11  | 13  |
| <b>9530091C0</b> | -0.6007 | 4.6199 | 5.8329 | 0.0157 | 0.6239 | 174 | 287  | 278  | 246 | 99  | 87  | 238 | 212 | 36  | 118 |
| <b>Abca8a</b>    | -0.5884 | 6.2809 | 6.3339 | 0.0118 | 0.5614 | 22  | 41   | 34   | 23  | 9   | 7   | 33  | 29  | 5   | 5   |
| <b>Aldh5a1</b>   | -0.5867 | 3.1092 | 4.0152 | 0.0451 | 0.8577 | 22  | 46   | 28   | 50  | 20  | 16  | 24  | 27  | 12  | 23  |
| <b>Sepn1</b>     | -0.5838 | 3.7875 | 4.3939 | 0.0361 | 0.811  | 17  | 55   | 58   | 35  | 9   | 10  | 34  | 30  | 10  | 19  |
| <b>Ap3m2</b>     | -0.5819 | 4.5572 | 4.3512 | 0.037  | 0.8131 | 65  | 49   | 49   | 17  | 22  | 27  | 20  | 33  | 6   | 40  |
| <b>Xrcc4</b>     | -0.5774 | 3.5911 | 6.1256 | 0.0133 | 0.5925 | 82  | 99   | 86   | 81  | 51  | 64  | 95  | 59  | 9   | 37  |
| <b>Abat</b>      | -0.5716 | 4.3133 | 4.1488 | 0.0417 | 0.8381 | 17  | 24   | 11   | 36  | 16  | 19  | 20  | 12  | 7   | 8   |
| <b>Trmt10c</b>   | -0.5622 | 3.3147 | 4.0125 | 0.0452 | 0.8577 | 34  | 59   | 49   | 80  | 28  | 26  | 31  | 38  | 19  | 41  |
| <b>Rap2a</b>     | -0.5566 | 5.7308 | 9.6124 | 0.0019 | 0.2767 | 49  | 75   | 95   | 64  | 33  | 31  | 28  | 48  | 24  | 62  |
| <b>Chpt1</b>     | -0.5495 | 5.2833 | 5.2342 | 0.0221 | 0.6995 | 25  | 53   | 49   | 39  | 24  | 24  | 15  | 14  | 12  | 52  |
| <b>Pigo</b>      | -0.5472 | 3.3666 | 3.9387 | 0.0472 | 0.8678 | 45  | 103  | 76   | 70  | 35  | 40  | 55  | 78  | 11  | 27  |
| <b>Mcm9</b>      | -0.5444 | 3.4811 | 5.0631 | 0.0244 | 0.7207 | 71  | 68   | 73   | 48  | 33  | 39  | 58  | 41  | 22  | 26  |
| <b>Mex3a</b>     | -0.5443 | 2.9471 | 3.8823 | 0.0488 | 0.8694 | 44  | 69   | 101  | 52  | 27  | 50  | 37  | 42  | 19  | 29  |
| <b>Slc22a21</b>  | -0.5425 | 3.6998 | 6.4859 | 0.0109 | 0.5486 | 82  | 187  | 176  | 130 | 63  | 67  | 101 | 110 | 24  | 103 |
| <b>2700097OC</b> | -0.5395 | 2.7202 | 4.3817 | 0.0363 | 0.811  | 35  | 63   | 62   | 59  | 16  | 22  | 40  | 38  | 10  | 38  |
| <b>Sym</b>       | -0.539  | 8.0151 | 7.554  | 0.006  | 0.4432 | 33  | 58   | 36   | 40  | 36  | 32  | 46  | 20  | 8   | 26  |
| <b>St7l</b>      | -0.5384 | 3.7964 | 4.1087 | 0.0427 | 0.8447 | 45  | 31   | 71   | 35  | 22  | 21  | 35  | 22  | 25  | 22  |
| <b>Tex10</b>     | -0.5368 | 3.6828 | 3.9359 | 0.0473 | 0.8678 | 75  | 103  | 57   | 59  | 73  | 55  | 43  | 64  | 25  | 56  |
| <b>Zfp182</b>    | -0.5358 | 3.0822 | 4.6432 | 0.0312 | 0.7726 | 43  | 60   | 45   | 57  | 33  | 29  | 33  | 49  | 17  | 25  |
| <b>Arhgef9</b>   | -0.5357 | 5.3989 | 5.3094 | 0.0212 | 0.6958 | 45  | 134  | 77   | 81  | 30  | 64  | 17  | 65  | 19  | 54  |
| <b>Ppfi4</b>     | -0.5302 | 4.8674 | 4.8383 | 0.0278 | 0.7488 | 28  | 46   | 83   | 25  | 19  | 29  | 53  | 27  | 12  | 6   |
| <b>Marf1</b>     | -0.5279 | 7.2053 | 5.0823 | 0.0242 | 0.7184 | 602 | 971  | 750  | 690 | 215 | 426 | 724 | 557 | 136 | 244 |
| <b>Fzd7</b>      | -0.5275 | 3.9473 | 5.2888 | 0.0215 | 0.6958 | 65  | 131  | 133  | 88  | 41  | 80  | 81  | 46  | 29  | 47  |
| <b>Zfp280b</b>   | -0.5275 | 3.1888 | 5.4606 | 0.0194 | 0.6702 | 28  | 49   | 62   | 56  | 23  | 28  | 34  | 25  | 15  | 36  |
| <b>Spaca6</b>    | -0.5191 | 4.0229 | 4.3284 | 0.0375 | 0.8131 | 73  | 165  | 165  | 108 | 53  | 78  | 143 | 87  | 11  | 59  |
| <b>lqgap2</b>    | -0.5187 | 4.2909 | 3.8555 | 0.0496 | 0.8726 | 165 | 94   | 93   | 90  | 28  | 58  | 105 | 69  | 29  | 48  |
| <b>Usp30</b>     | -0.5173 | 3.6348 | 4.4635 | 0.0346 | 0.8027 | 52  | 56   | 64   | 61  | 47  | 30  | 34  | 32  | 16  | 75  |
| <b>Zbtb25</b>    | -0.5168 | 3.3093 | 3.8982 | 0.0483 | 0.8678 | 42  | 69   | 86   | 59  | 29  | 42  | 52  | 42  | 17  | 29  |
| <b>Gm39584</b>   | -0.5152 | 4.3811 | 7.5595 | 0.006  | 0.4432 | 166 | 216  | 188  | 163 | 93  | 83  | 164 | 146 | 65  | 76  |
| <b>Ctdp1</b>     | -0.5136 | 3.7733 | 5.3546 | 0.0207 | 0.6891 | 85  | 95   | 120  | 72  | 40  | 52  | 80  | 49  | 25  | 60  |
| <b>Soat1</b>     | -0.5083 | 4.2677 | 3.9042 | 0.0482 | 0.8678 | 62  | 68   | 69   | 30  | 16  | 37  | 25  | 41  | 14  | 35  |
| <b>Zmym1</b>     | -0.5074 | 3.2778 | 4.0753 | 0.0435 | 0.85   | 36  | 34   | 59   | 66  | 31  | 32  | 35  | 29  | 24  | 26  |
| <b>Slc25a38</b>  | -0.504  | 4.748  | 7.1424 | 0.0075 | 0.4864 | 77  | 134  | 79   | 72  | 45  | 45  | 58  | 72  | 23  | 65  |
| <b>Trerf1</b>    | -0.5036 | 3.4828 | 3.8688 | 0.0492 | 0.8715 | 88  | 163  | 128  | 89  | 50  | 60  | 106 | 96  | 29  | 45  |
| <b>Ilf2</b>      | -0.4997 | 5.0798 | 9.2251 | 0.0024 | 0.3133 | 184 | 235  | 190  | 168 | 117 | 146 | 132 | 151 | 44  | 123 |
| <b>Wdr70</b>     | -0.498  | 4.7255 | 5.1101 | 0.0238 | 0.7149 | 110 | 197  | 140  | 110 | 43  | 111 | 96  | 98  | 24  | 54  |
| <b>Abcc1</b>     | -0.4978 | 3.4422 | 5.5347 | 0.0186 | 0.6586 | 59  | 72   | 65   | 46  | 36  | 28  | 34  | 44  | 30  | 41  |
| <b>Ldoc1l</b>    | -0.4955 | 4.2433 | 4.91   | 0.0267 | 0.7377 | 46  | 92   | 81   | 54  | 25  | 37  | 28  | 40  | 19  | 62  |
| <b>Il4ra</b>     | -0.4903 | 4.2715 | 5.5954 | 0.018  | 0.6485 | 54  | 75   | 39   | 58  | 27  | 21  | 44  | 38  | 27  | 34  |
| <b>Ap1s2</b>     | -0.4896 | 7.1036 | 6.1585 | 0.0131 | 0.5875 | 44  | 35   | 60   | 24  | 23  | 22  | 41  | 31  | 5   | 25  |
| <b>Chka</b>      | -0.4895 | 5.1751 | 7.4806 | 0.0062 | 0.4459 | 87  | 166  | 174  | 146 | 72  | 59  | 108 | 133 | 33  | 95  |
| <b>Ece2</b>      | -0.489  | 4.4945 | 5.9705 | 0.0145 | 0.6057 | 40  | 63   | 54   | 47  | 30  | 32  | 39  | 42  | 15  | 26  |
| <b>Nrp2</b>      | -0.4882 | 5.3546 | 6.9105 | 0.0086 | 0.5048 | 59  | 44   | 44   | 47  | 37  | 31  | 50  | 38  | 12  | 26  |
| <b>Ndufaf2</b>   | -0.4825 | 5.11   | 8.9762 | 0.0027 | 0.3226 | 99  | 94   | 114  | 101 | 51  | 89  | 82  | 44  | 34  | 54  |
| <b>Akap12</b>    | -0.4822 | 9.1806 | 5.2817 | 0.0216 | 0.6958 | 38  | 32   | 56   | 9   | 24  | 17  | 30  | 26  | 12  | 20  |
| <b>Cnnm4</b>     | -0.4773 | 3.8046 | 4.5476 | 0.033  | 0.7852 | 33  | 37   | 60   | 42  | 17  | 23  | 41  | 16  | 9   | 37  |
| <b>L3mbtl3</b>   | -0.4768 | 4.3659 | 6.1739 | 0.013  | 0.5852 | 83  | 133  | 128  | 97  | 45  | 50  | 96  | 87  | 16  | 79  |
| <b>Mbd4</b>      | -0.4758 | 3.6411 | 4.5398 | 0.0331 | 0.7861 | 46  | 65   | 80   | 37  | 31  | 35  | 42  | 31  | 14  | 49  |
| <b>Abi3bp</b>    | -0.474  | 4.9598 | 4.9091 | 0.0267 | 0.7377 | 305 | 351  | 338  | 282 | 172 | 191 | 314 | 256 | 84  | 154 |
| <b>Zfp955b</b>   | -0.4725 | 4.3593 | 5.8726 | 0.0154 | 0.6181 | 107 | 128  | 117  | 78  | 52  | 49  | 50  | 68  | 43  | 99  |
| <b>Ndufaf5</b>   | -0.4717 | 5.083  | 4.4132 | 0.0357 | 0.811  | 25  | 46   | 37   | 20  | 19  | 17  | 35  | 18  | 8   | 20  |

|                  |         |        |        |        |        |      |      |      |      |     |      |      |      |     |     |
|------------------|---------|--------|--------|--------|--------|------|------|------|------|-----|------|------|------|-----|-----|
| <b>Ccdc64</b>    | -0.468  | 4.3904 | 6.5145 | 0.0107 | 0.546  | 109  | 130  | 158  | 111  | 56  | 82   | 90   | 59   | 27  | 119 |
| <b>Smim12</b>    | -0.4674 | 5.52   | 8.3572 | 0.0038 | 0.3742 | 60   | 83   | 93   | 72   | 40  | 43   | 55   | 56   | 29  | 47  |
| <b>Hist1h1e</b>  | -0.4656 | 6.2448 | 5.9769 | 0.0145 | 0.6057 | 574  | 794  | 435  | 294  | 329 | 372  | 320  | 310  | 228 | 327 |
| <b>Nr2c2ap</b>   | -0.4617 | 4.2825 | 5.7864 | 0.0162 | 0.6285 | 61   | 49   | 66   | 51   | 43  | 37   | 31   | 54   | 24  | 36  |
| <b>Spopl</b>     | -0.4591 | 4.6714 | 9.7941 | 0.0018 | 0.2615 | 110  | 179  | 165  | 141  | 67  | 83   | 138  | 97   | 32  | 99  |
| <b>Zfp821</b>    | -0.4584 | 4.2183 | 4.2709 | 0.0388 | 0.8196 | 76   | 142  | 155  | 104  | 37  | 66   | 122  | 56   | 42  | 46  |
| <b>Herc1</b>     | -0.4574 | 7.3753 | 20.98  | 5E-06  | 0.0162 | 441  | 593  | 576  | 474  | 261 | 286  | 436  | 371  | 182 | 293 |
| <b>Sox9</b>      | -0.4552 | 6.661  | 7.3071 | 0.0069 | 0.4698 | 1260 | 1377 | 1372 | 608  | 382 | 696  | 705  | 868  | 339 | 599 |
| <b>Lsm7</b>      | -0.4536 | 4.5037 | 4.38   | 0.0364 | 0.811  | 62   | 136  | 102  | 77   | 38  | 55   | 79   | 53   | 23  | 65  |
| <b>Fmnl2</b>     | -0.4521 | 6.1661 | 5.3802 | 0.0204 | 0.6835 | 56   | 60   | 75   | 43   | 27  | 11   | 36   | 53   | 25  | 48  |
| <b>Usp39</b>     | -0.4513 | 4.6044 | 5.2517 | 0.0219 | 0.6995 | 135  | 156  | 139  | 164  | 59  | 57   | 102  | 125  | 46  | 110 |
| <b>Tpgs2</b>     | -0.4511 | 5.5205 | 4.397  | 0.036  | 0.811  | 31   | 64   | 50   | 38   | 44  | 33   | 27   | 18   | 23  | 51  |
| <b>Yars2</b>     | -0.4505 | 4.0877 | 5.5325 | 0.0187 | 0.6586 | 51   | 87   | 89   | 62   | 32  | 42   | 51   | 51   | 27  | 40  |
| <b>Tnik</b>      | -0.4458 | 5.7222 | 6.7059 | 0.0096 | 0.525  | 161  | 229  | 171  | 106  | 62  | 105  | 135  | 120  | 41  | 86  |
| <b>Utp15</b>     | -0.4431 | 3.9651 | 4.8459 | 0.0277 | 0.747  | 57   | 110  | 110  | 80   | 52  | 31   | 98   | 80   | 27  | 47  |
| <b>Paxbp1</b>    | -0.4368 | 4.9601 | 5.5861 | 0.0181 | 0.6487 | 192  | 329  | 272  | 241  | 74  | 173  | 227  | 152  | 76  | 101 |
| <b>Rbm3</b>      | -0.4361 | 4.076  | 4.7044 | 0.0301 | 0.7694 | 82   | 127  | 143  | 105  | 82  | 56   | 106  | 86   | 50  | 72  |
| <b>Arnt2</b>     | -0.4349 | 5.054  | 4.7515 | 0.0293 | 0.7587 | 47   | 43   | 58   | 42   | 18  | 22   | 45   | 43   | 7   | 27  |
| <b>Ercc4</b>     | -0.4348 | 4.1959 | 8.4646 | 0.0036 | 0.3649 | 96   | 122  | 119  | 81   | 46  | 57   | 86   | 71   | 41  | 57  |
| <b>Lamb3</b>     | -0.4329 | 4.2298 | 5.0246 | 0.025  | 0.7219 | 199  | 323  | 188  | 206  | 96  | 151  | 148  | 157  | 90  | 113 |
| <b>Fam89b</b>    | -0.4319 | 5.8241 | 4.0929 | 0.0431 | 0.8484 | 32   | 84   | 62   | 22   | 38  | 42   | 26   | 45   | 19  | 26  |
| <b>Nrg1</b>      | -0.4313 | 5.6567 | 8.7382 | 0.0031 | 0.3385 | 107  | 192  | 201  | 130  | 66  | 77   | 97   | 133  | 51  | 104 |
| <b>Znrf3</b>     | -0.4302 | 3.6921 | 5.2799 | 0.0216 | 0.6958 | 80   | 112  | 101  | 102  | 61  | 67   | 67   | 69   | 26  | 88  |
| <b>Zfp512</b>    | -0.428  | 5.074  | 6.4187 | 0.0113 | 0.5538 | 141  | 223  | 160  | 150  | 82  | 126  | 150  | 103  | 61  | 71  |
| <b>Mapk8ip3</b>  | -0.4251 | 6.969  | 5.7751 | 0.0163 | 0.6285 | 50   | 51   | 93   | 53   | 15  | 36   | 46   | 37   | 17  | 41  |
| <b>Fam160b1</b>  | -0.4204 | 5.52   | 7.1561 | 0.0075 | 0.4843 | 166  | 320  | 244  | 195  | 73  | 130  | 182  | 120  | 55  | 184 |
| <b>Etv5</b>      | -0.4183 | 4.9144 | 4.6976 | 0.0302 | 0.7699 | 65   | 67   | 69   | 69   | 41  | 39   | 55   | 58   | 18  | 50  |
| <b>Smc2</b>      | -0.418  | 5.3104 | 6.5518 | 0.0105 | 0.5454 | 309  | 437  | 244  | 252  | 201 | 258  | 215  | 255  | 98  | 181 |
| <b>D10Wsu10</b>  | -0.4172 | 4.644  | 6.2317 | 0.0125 | 0.5758 | 115  | 150  | 155  | 117  | 66  | 90   | 110  | 86   | 50  | 75  |
| <b>Efna3</b>     | -0.4172 | 3.8544 | 4.9175 | 0.0266 | 0.7377 | 143  | 202  | 166  | 123  | 79  | 101  | 134  | 111  | 57  | 83  |
| <b>Arhgef25</b>  | -0.4166 | 6.1699 | 4.0765 | 0.0435 | 0.85   | 43   | 62   | 66   | 27   | 24  | 39   | 47   | 34   | 7   | 27  |
| <b>Vstm5</b>     | -0.4159 | 4.3572 | 3.9336 | 0.0473 | 0.8678 | 26   | 50   | 70   | 35   | 21  | 23   | 41   | 37   | 10  | 28  |
| <b>Crebl2</b>    | -0.4159 | 4.9238 | 4.8799 | 0.0272 | 0.7422 | 71   | 97   | 81   | 95   | 67  | 41   | 85   | 97   | 26  | 49  |
| <b>Pcf11</b>     | -0.4151 | 6.3062 | 10.011 | 0.0016 | 0.2542 | 406  | 761  | 584  | 531  | 294 | 427  | 503  | 421  | 146 | 302 |
| <b>Pclo</b>      | -0.413  | 7.4635 | 5.7204 | 0.0168 | 0.6337 | 126  | 165  | 132  | 87   | 73  | 65   | 93   | 121  | 63  | 51  |
| <b>B3gat3</b>    | -0.4102 | 5.8107 | 8.0886 | 0.0045 | 0.3937 | 110  | 179  | 193  | 98   | 74  | 94   | 146  | 64   | 48  | 98  |
| <b>Micu3</b>     | -0.4077 | 6.963  | 4.8034 | 0.0284 | 0.7519 | 56   | 57   | 47   | 47   | 32  | 27   | 41   | 57   | 18  | 25  |
| <b>Igf1</b>      | -0.4052 | 4.9244 | 4.2772 | 0.0386 | 0.8189 | 58   | 81   | 71   | 59   | 29  | 36   | 46   | 39   | 18  | 67  |
| <b>E030024N2</b> | -0.3945 | 3.8482 | 3.925  | 0.0476 | 0.8678 | 72   | 120  | 103  | 73   | 65  | 58   | 75   | 74   | 29  | 72  |
| <b>Cln6</b>      | -0.3945 | 4.461  | 4.7402 | 0.0295 | 0.7615 | 188  | 237  | 188  | 200  | 71  | 153  | 150  | 115  | 51  | 146 |
| <b>Izumo4</b>    | -0.3939 | 4.0802 | 4.4034 | 0.0359 | 0.811  | 43   | 96   | 62   | 53   | 25  | 22   | 45   | 45   | 26  | 52  |
| <b>Npepl1</b>    | -0.3903 | 4.7158 | 4.9282 | 0.0264 | 0.7377 | 97   | 165  | 131  | 131  | 49  | 80   | 98   | 93   | 48  | 72  |
| <b>Vim</b>       | -0.3889 | 8.277  | 8.0197 | 0.0046 | 0.4007 | 176  | 192  | 187  | 133  | 75  | 107  | 125  | 154  | 42  | 111 |
| <b>Afmid</b>     | -0.3835 | 4.2628 | 4.3224 | 0.0376 | 0.8131 | 138  | 230  | 186  | 162  | 71  | 110  | 178  | 150  | 32  | 98  |
| <b>Sobp</b>      | -0.3782 | 5.7885 | 5.1715 | 0.023  | 0.7051 | 68   | 113  | 116  | 56   | 41  | 67   | 66   | 65   | 26  | 50  |
| <b>Morc3</b>     | -0.3767 | 4.5689 | 3.9248 | 0.0476 | 0.8678 | 108  | 224  | 166  | 148  | 130 | 116  | 91   | 148  | 65  | 130 |
| <b>Anks3</b>     | -0.3744 | 4.326  | 4.2845 | 0.0385 | 0.8177 | 93   | 128  | 113  | 118  | 51  | 64   | 121  | 101  | 24  | 59  |
| <b>Celsr2</b>    | -0.3718 | 6.4453 | 7.2348 | 0.0072 | 0.4764 | 419  | 659  | 652  | 510  | 247 | 371  | 595  | 399  | 152 | 276 |
| <b>Zdhhc21</b>   | -0.3717 | 7.0404 | 8.5454 | 0.0035 | 0.3571 | 563  | 897  | 707  | 536  | 254 | 394  | 598  | 553  | 188 | 349 |
| <b>Crlf3</b>     | -0.3715 | 4.8018 | 4.0165 | 0.0451 | 0.8577 | 105  | 215  | 195  | 130  | 67  | 102  | 136  | 152  | 28  | 91  |
| <b>Usp11</b>     | -0.3696 | 4.7847 | 5.7815 | 0.0162 | 0.6285 | 66   | 135  | 115  | 109  | 40  | 80   | 89   | 62   | 41  | 51  |
| <b>Vps13d</b>    | -0.3687 | 5.3847 | 7.0871 | 0.0078 | 0.4918 | 136  | 198  | 158  | 156  | 91  | 93   | 154  | 130  | 42  | 121 |
| <b>Phf1</b>      | -0.3667 | 5.6023 | 4.1843 | 0.0408 | 0.834  | 198  | 206  | 262  | 234  | 68  | 139  | 257  | 144  | 65  | 93  |
| <b>Vezt</b>      | -0.3649 | 5.7683 | 11.435 | 0.0007 | 0.1764 | 186  | 250  | 285  | 190  | 99  | 166  | 191  | 135  | 75  | 147 |
| <b>Fnbp4</b>     | -0.3623 | 5.7059 | 4.7848 | 0.0287 | 0.7541 | 263  | 559  | 478  | 408  | 145 | 208  | 528  | 256  | 137 | 187 |
| <b>Haus2</b>     | -0.3619 | 4.3734 | 4.2564 | 0.0391 | 0.8215 | 104  | 141  | 107  | 79   | 39  | 77   | 96   | 67   | 31  | 62  |
| <b>Kansl1l</b>   | -0.3578 | 4.7387 | 3.9217 | 0.0477 | 0.8678 | 146  | 209  | 189  | 158  | 98  | 124  | 166  | 128  | 66  | 92  |
| <b>Ankrd12</b>   | -0.3575 | 8.2715 | 6.4661 | 0.011  | 0.5486 | 1195 | 1948 | 1792 | 1396 | 555 | 1039 | 1473 | 1367 | 405 | 633 |
| <b>Rrs1</b>      | -0.3575 | 4.1072 | 4.3402 | 0.0372 | 0.8131 | 118  | 160  | 126  | 85   | 43  | 59   | 95   | 98   | 45  | 75  |
| <b>Acp1</b>      | -0.3559 | 5.671  | 4.8608 | 0.0275 | 0.7469 | 227  | 268  | 281  | 214  | 113 | 122  | 261  | 198  | 74  | 155 |
| <b>Sertad4</b>   | -0.355  | 4.7986 | 4.2338 | 0.0396 | 0.8235 | 108  | 263  | 236  | 145  | 113 | 93   | 153  | 159  | 60  | 155 |
| <b>Xab2</b>      | -0.3531 | 4.5639 | 5.3359 | 0.0209 | 0.6908 | 141  | 196  | 227  | 146  | 73  | 106  | 169  | 137  | 39  | 119 |

|                  |         |        |        |        |        |      |      |      |      |     |      |      |      |     |      |
|------------------|---------|--------|--------|--------|--------|------|------|------|------|-----|------|------|------|-----|------|
| <b>Mysm1</b>     | -0.3531 | 5.4299 | 5.5776 | 0.0182 | 0.6499 | 239  | 320  | 296  | 255  | 122 | 208  | 146  | 216  | 100 | 188  |
| <b>Ccdc9</b>     | -0.3528 | 4.337  | 3.9843 | 0.0459 | 0.8611 | 102  | 173  | 164  | 159  | 65  | 92   | 142  | 97   | 45  | 103  |
| <b>BC003331</b>  | -0.3493 | 6.3797 | 10.076 | 0.0015 | 0.2478 | 224  | 368  | 312  | 220  | 136 | 180  | 204  | 188  | 95  | 228  |
| <b>Lemd2</b>     | -0.346  | 5.6838 | 4.6645 | 0.0308 | 0.772  | 307  | 374  | 422  | 387  | 142 | 286  | 366  | 187  | 138 | 185  |
| <b>Diaph3</b>    | -0.3427 | 4.9892 | 4.8271 | 0.028  | 0.7488 | 183  | 198  | 258  | 208  | 146 | 101  | 177  | 176  | 95  | 182  |
| <b>Pccb</b>      | -0.3421 | 5.2652 | 4.3488 | 0.037  | 0.8131 | 128  | 224  | 187  | 145  | 62  | 104  | 115  | 160  | 35  | 122  |
| <b>Dcaf17</b>    | -0.3419 | 4.9431 | 5.6294 | 0.0177 | 0.6405 | 176  | 269  | 215  | 179  | 117 | 128  | 174  | 186  | 81  | 122  |
| <b>Prkacb</b>    | -0.3418 | 7.6432 | 6.716  | 0.0096 | 0.525  | 268  | 376  | 273  | 296  | 119 | 213  | 252  | 229  | 92  | 176  |
| <b>Skiv2l</b>    | -0.3413 | 5.5189 | 3.9525 | 0.0468 | 0.8678 | 144  | 358  | 326  | 231  | 106 | 176  | 165  | 199  | 104 | 148  |
| <b>Tnks1bp1</b>  | -0.3412 | 6.4879 | 8.1617 | 0.0043 | 0.3886 | 509  | 841  | 805  | 552  | 328 | 413  | 505  | 504  | 264 | 449  |
| <b>Dnm3</b>      | -0.3355 | 7.68   | 4.5999 | 0.032  | 0.7798 | 64   | 118  | 116  | 81   | 53  | 44   | 119  | 67   | 42  | 44   |
| <b>Kmt2a</b>     | -0.3348 | 7.9799 | 9.2597 | 0.0023 | 0.3121 | 1278 | 2421 | 1971 | 1523 | 680 | 1068 | 1728 | 1458 | 473 | 988  |
| <b>Ccdc34</b>    | -0.3309 | 6.0685 | 4.3116 | 0.0379 | 0.8131 | 506  | 736  | 496  | 422  | 244 | 495  | 348  | 424  | 189 | 242  |
| <b>Pgp</b>       | -0.3305 | 6.0986 | 3.8606 | 0.0494 | 0.8722 | 127  | 168  | 157  | 125  | 39  | 103  | 117  | 87   | 49  | 80   |
| <b>Cntln</b>     | -0.3299 | 5.9954 | 5.5895 | 0.0181 | 0.6487 | 220  | 339  | 255  | 220  | 131 | 197  | 188  | 194  | 92  | 169  |
| <b>Lnp</b>       | -0.3269 | 5.794  | 5.2753 | 0.0216 | 0.6958 | 80   | 163  | 128  | 84   | 88  | 80   | 138  | 78   | 36  | 76   |
| <b>Slc25a12</b>  | -0.3266 | 6.6984 | 3.9043 | 0.0482 | 0.8678 | 164  | 239  | 202  | 162  | 143 | 161  | 192  | 119  | 81  | 126  |
| <b>Stoml1</b>    | -0.3262 | 5.6    | 4.0317 | 0.0447 | 0.8574 | 63   | 117  | 110  | 73   | 48  | 45   | 105  | 54   | 29  | 71   |
| <b>Tbc1d10a</b>  | -0.326  | 5.5786 | 4.705  | 0.0301 | 0.7694 | 380  | 569  | 593  | 387  | 190 | 296  | 451  | 384  | 147 | 260  |
| <b>Atf4</b>      | -0.3244 | 8.1402 | 7.6267 | 0.0058 | 0.4358 | 1472 | 2560 | 2537 | 1486 | 962 | 1497 | 1547 | 1371 | 789 | 1122 |
| <b>Dip2c</b>     | -0.324  | 5.7925 | 5.0025 | 0.0253 | 0.7267 | 120  | 221  | 186  | 147  | 59  | 82   | 150  | 124  | 42  | 137  |
| <b>Zfp503</b>    | -0.3237 | 4.6608 | 4.2382 | 0.0395 | 0.823  | 91   | 160  | 170  | 88   | 67  | 71   | 111  | 124  | 32  | 87   |
| <b>Nop14</b>     | -0.3235 | 5.4703 | 5.2352 | 0.0221 | 0.6995 | 225  | 326  | 297  | 218  | 101 | 147  | 260  | 180  | 113 | 133  |
| <b>Upf1</b>      | -0.3234 | 5.0053 | 5.2116 | 0.0224 | 0.6995 | 191  | 298  | 287  | 186  | 106 | 122  | 227  | 190  | 89  | 146  |
| <b>Rfc2</b>      | -0.3229 | 4.904  | 4.94   | 0.0262 | 0.7359 | 172  | 204  | 274  | 181  | 97  | 137  | 218  | 155  | 41  | 153  |
| <b>Lrch3</b>     | -0.3226 | 5.459  | 4.9068 | 0.0268 | 0.7377 | 118  | 201  | 152  | 125  | 88  | 115  | 148  | 98   | 52  | 93   |
| <b>Cxxc1</b>     | -0.3224 | 5.2859 | 5.6626 | 0.0173 | 0.6381 | 202  | 381  | 317  | 261  | 132 | 166  | 298  | 219  | 113 | 142  |
| <b>Srpr</b>      | -0.3216 | 5.4973 | 5.0852 | 0.0241 | 0.7184 | 190  | 358  | 311  | 256  | 126 | 195  | 205  | 206  | 105 | 174  |
| <b>Phf20</b>     | -0.3215 | 5.4813 | 4.2377 | 0.0395 | 0.823  | 86   | 92   | 71   | 63   | 51  | 52   | 66   | 60   | 24  | 70   |
| <b>Vamp2</b>     | -0.3195 | 7.7893 | 4.7712 | 0.0289 | 0.7557 | 166  | 325  | 322  | 231  | 137 | 164  | 285  | 213  | 99  | 107  |
| <b>Mettl16</b>   | -0.3176 | 5.8077 | 5.4696 | 0.0194 | 0.6697 | 256  | 359  | 407  | 305  | 184 | 196  | 388  | 209  | 141 | 189  |
| <b>Pelp1</b>     | -0.3155 | 5.2818 | 3.8744 | 0.049  | 0.8705 | 186  | 324  | 250  | 201  | 81  | 169  | 256  | 125  | 75  | 132  |
| <b>Prkcb</b>     | -0.3139 | 6.7818 | 3.9448 | 0.047  | 0.8678 | 233  | 490  | 297  | 247  | 217 | 276  | 236  | 317  | 84  | 206  |
| <b>Atl3</b>      | -0.3133 | 5.2848 | 4.6147 | 0.0317 | 0.7768 | 200  | 284  | 221  | 206  | 168 | 148  | 174  | 181  | 95  | 212  |
| <b>Mtcl1</b>     | -0.3125 | 5.5706 | 3.8489 | 0.0498 | 0.8736 | 136  | 164  | 128  | 99   | 60  | 116  | 111  | 75   | 35  | 99   |
| <b>Ttc28</b>     | -0.3121 | 6.1717 | 6.0577 | 0.0138 | 0.6019 | 347  | 566  | 572  | 510  | 215 | 415  | 426  | 353  | 137 | 303  |
| <b>Hmg20a</b>    | -0.3106 | 5.4107 | 6.9575 | 0.0083 | 0.5048 | 163  | 235  | 225  | 218  | 133 | 129  | 196  | 181  | 88  | 136  |
| <b>Zfp768</b>    | -0.3099 | 4.516  | 4.3235 | 0.0376 | 0.8131 | 158  | 176  | 198  | 188  | 100 | 137  | 145  | 158  | 69  | 103  |
| <b>Cnot11</b>    | -0.3091 | 4.735  | 4.4525 | 0.0349 | 0.8037 | 155  | 158  | 195  | 138  | 86  | 126  | 117  | 105  | 62  | 130  |
| <b>Pdcd4</b>     | -0.3086 | 7.1148 | 3.9814 | 0.046  | 0.8611 | 1009 | 1659 | 1448 | 930  | 835 | 1010 | 1242 | 1011 | 512 | 605  |
| <b>Git1</b>      | -0.3081 | 5.7774 | 3.8668 | 0.0493 | 0.8715 | 202  | 273  | 345  | 214  | 104 | 171  | 231  | 199  | 73  | 167  |
| <b>Fam192a</b>   | -0.3045 | 5.225  | 6.7381 | 0.0094 | 0.5248 | 182  | 242  | 256  | 187  | 118 | 137  | 191  | 167  | 84  | 154  |
| <b>Crybg3</b>    | -0.3041 | 6.5126 | 6.7699 | 0.0093 | 0.5211 | 639  | 1016 | 959  | 691  | 488 | 527  | 806  | 600  | 363 | 504  |
| <b>Aff1</b>      | -0.3022 | 5.216  | 6.9049 | 0.0086 | 0.5053 | 235  | 320  | 363  | 276  | 191 | 230  | 298  | 231  | 97  | 202  |
| <b>Rexo1</b>     | -0.2994 | 5.3469 | 4.1199 | 0.0424 | 0.8429 | 180  | 330  | 247  | 315  | 87  | 145  | 280  | 197  | 71  | 180  |
| <b>Zcchc2</b>    | -0.299  | 4.821  | 3.9098 | 0.048  | 0.8678 | 141  | 194  | 272  | 160  | 92  | 101  | 164  | 135  | 84  | 143  |
| <b>Ppfia3</b>    | -0.2966 | 5.5089 | 5.0558 | 0.0245 | 0.7214 | 87   | 146  | 144  | 123  | 66  | 91   | 130  | 98   | 37  | 72   |
| <b>H2afj</b>     | -0.2965 | 5.9631 | 5.7059 | 0.0169 | 0.6337 | 371  | 505  | 418  | 317  | 235 | 303  | 396  | 242  | 122 | 351  |
| <b>BC005561</b>  | -0.2958 | 5.9173 | 4.1898 | 0.0407 | 0.8329 | 278  | 553  | 521  | 379  | 177 | 208  | 523  | 372  | 112 | 240  |
| <b>Golim4</b>    | -0.2956 | 6.7674 | 5.3605 | 0.0206 | 0.6881 | 503  | 537  | 805  | 531  | 297 | 427  | 617  | 382  | 225 | 359  |
| <b>Nol11</b>     | -0.2956 | 4.7925 | 4.1921 | 0.0406 | 0.8329 | 185  | 208  | 198  | 176  | 104 | 131  | 187  | 146  | 64  | 138  |
| <b>Pam16</b>     | -0.2938 | 4.819  | 3.9163 | 0.0478 | 0.8678 | 82   | 115  | 86   | 95   | 65  | 62   | 87   | 86   | 33  | 71   |
| <b>Mrpl10</b>    | -0.2934 | 5.2919 | 5.0072 | 0.0252 | 0.7253 | 173  | 247  | 232  | 241  | 116 | 173  | 209  | 162  | 59  | 171  |
| <b>Las1l</b>     | -0.2927 | 6.1771 | 5.1514 | 0.0232 | 0.7084 | 447  | 762  | 601  | 497  | 275 | 439  | 435  | 421  | 177 | 445  |
| <b>Ahdc1</b>     | -0.2917 | 6.2221 | 5.9892 | 0.0144 | 0.6045 | 462  | 782  | 739  | 554  | 302 | 470  | 585  | 524  | 215 | 320  |
| <b>Dnajc13</b>   | -0.2913 | 6.1662 | 5.5984 | 0.018  | 0.6481 | 281  | 341  | 339  | 214  | 193 | 173  | 288  | 218  | 132 | 225  |
| <b>Sgms1</b>     | -0.2895 | 5.7814 | 5.2187 | 0.0223 | 0.6995 | 313  | 467  | 480  | 314  | 204 | 327  | 333  | 238  | 113 | 329  |
| <b>1110032AC</b> | -0.2894 | 5.6171 | 4.8977 | 0.0269 | 0.7397 | 190  | 336  | 308  | 202  | 129 | 193  | 210  | 196  | 66  | 211  |
| <b>Atp13a2</b>   | -0.2856 | 6.1212 | 5.6911 | 0.0171 | 0.6337 | 190  | 249  | 257  | 175  | 86  | 152  | 230  | 142  | 65  | 134  |
| <b>Dusp3</b>     | -0.2844 | 7.0368 | 5.1898 | 0.0227 | 0.7048 | 141  | 193  | 270  | 170  | 106 | 112  | 214  | 125  | 73  | 146  |
| <b>Smc6</b>      | -0.284  | 7.3995 | 7.5546 | 0.006  | 0.4432 | 872  | 1256 | 1149 | 851  | 497 | 890  | 831  | 790  | 333 | 615  |
| <b>Golgb1</b>    | -0.2834 | 7.6954 | 6.9408 | 0.0084 | 0.5048 | 1123 | 1746 | 1715 | 1276 | 677 | 1030 | 1347 | 1150 | 558 | 759  |

|                 |         |        |        |        |        |      |      |      |      |      |      |      |      |      |      |
|-----------------|---------|--------|--------|--------|--------|------|------|------|------|------|------|------|------|------|------|
| <b>Grhl2</b>    | -0.2823 | 5.4357 | 6.1383 | 0.0132 | 0.5897 | 457  | 698  | 541  | 451  | 229  | 348  | 528  | 341  | 184  | 383  |
| <b>Zbtb4</b>    | -0.282  | 7.0262 | 6.829  | 0.009  | 0.5138 | 300  | 528  | 618  | 364  | 195  | 273  | 400  | 398  | 133  | 297  |
| <b>Vps13a</b>   | -0.2809 | 6.3462 | 4.2564 | 0.0391 | 0.8215 | 385  | 690  | 720  | 383  | 343  | 405  | 500  | 389  | 207  | 398  |
| <b>Myo10</b>    | -0.2788 | 6.0939 | 6.0199 | 0.0141 | 0.604  | 339  | 516  | 542  | 427  | 188  | 268  | 371  | 357  | 170  | 326  |
| <b>Bdp1</b>     | -0.2788 | 6.5252 | 5.9883 | 0.0144 | 0.6045 | 549  | 789  | 731  | 548  | 253  | 492  | 563  | 462  | 233  | 368  |
| <b>Evi5</b>     | -0.2777 | 7.6626 | 7.9119 | 0.0049 | 0.4069 | 876  | 1545 | 1253 | 1031 | 539  | 890  | 1172 | 883  | 363  | 669  |
| <b>Ilf3</b>     | -0.276  | 5.8468 | 4.818  | 0.0282 | 0.7493 | 324  | 400  | 331  | 303  | 203  | 231  | 376  | 319  | 87   | 233  |
| <b>Pcyox1</b>   | -0.275  | 6.1295 | 4.2373 | 0.0395 | 0.823  | 296  | 312  | 325  | 236  | 202  | 223  | 261  | 252  | 105  | 232  |
| <b>Myo9a</b>    | -0.272  | 7.3574 | 6.1844 | 0.0129 | 0.5845 | 286  | 309  | 297  | 269  | 160  | 176  | 334  | 231  | 81   | 225  |
| <b>Itsn2</b>    | -0.2709 | 7.6924 | 5.7097 | 0.0169 | 0.6337 | 1110 | 1634 | 1629 | 1179 | 632  | 1070 | 1286 | 1105 | 502  | 678  |
| <b>Setd2</b>    | -0.2704 | 7.0674 | 11.793 | 0.0006 | 0.1573 | 804  | 1255 | 1189 | 877  | 469  | 694  | 883  | 802  | 375  | 691  |
| <b>Cdk13</b>    | -0.2701 | 6.1109 | 4.7008 | 0.0301 | 0.7699 | 366  | 510  | 545  | 348  | 219  | 306  | 384  | 342  | 163  | 304  |
| <b>6430548M</b> | -0.2663 | 6.7501 | 4.7745 | 0.0289 | 0.7552 | 277  | 351  | 338  | 205  | 105  | 180  | 185  | 244  | 104  | 230  |
| <b>Trpm7</b>    | -0.2649 | 5.975  | 3.9926 | 0.0457 | 0.8599 | 268  | 378  | 331  | 299  | 176  | 179  | 324  | 273  | 130  | 215  |
| <b>Tln2</b>     | -0.2648 | 7.5552 | 4.3901 | 0.0361 | 0.811  | 202  | 386  | 282  | 210  | 102  | 175  | 208  | 207  | 108  | 169  |
| <b>Nelfe</b>    | -0.2647 | 5.6507 | 5.0838 | 0.0242 | 0.7184 | 325  | 393  | 369  | 328  | 170  | 232  | 292  | 237  | 155  | 279  |
| <b>Mga</b>      | -0.2612 | 6.4561 | 4.5886 | 0.0322 | 0.7798 | 449  | 574  | 621  | 495  | 266  | 338  | 655  | 403  | 195  | 292  |
| <b>Ash1l</b>    | -0.261  | 8.0496 | 8.47   | 0.0036 | 0.3649 | 1533 | 2063 | 1877 | 1371 | 785  | 1171 | 1614 | 1406 | 587  | 1062 |
| <b>Zcchc11</b>  | -0.2609 | 6.3916 | 4.0719 | 0.0436 | 0.85   | 469  | 725  | 750  | 459  | 349  | 440  | 577  | 470  | 257  | 343  |
| <b>Epn2</b>     | -0.2608 | 6.5506 | 5.0629 | 0.0244 | 0.7207 | 259  | 427  | 483  | 355  | 265  | 280  | 335  | 289  | 150  | 334  |
| <b>Pdzd11</b>   | -0.26   | 5.5841 | 3.8576 | 0.0495 | 0.8726 | 254  | 270  | 244  | 230  | 116  | 181  | 204  | 209  | 95   | 165  |
| <b>Rasal2</b>   | -0.2593 | 7.1086 | 6.1574 | 0.0131 | 0.5875 | 473  | 690  | 539  | 477  | 233  | 342  | 502  | 508  | 161  | 350  |
| <b>Bmpr1a</b>   | -0.2592 | 6.1745 | 4.6156 | 0.0317 | 0.7768 | 438  | 598  | 522  | 503  | 214  | 386  | 476  | 378  | 176  | 323  |
| <b>Tnpo3</b>    | -0.2589 | 6.7307 | 5.0639 | 0.0244 | 0.7207 | 611  | 928  | 931  | 697  | 340  | 545  | 839  | 622  | 250  | 447  |
| <b>Emsy</b>     | -0.2563 | 5.8605 | 4.1643 | 0.0413 | 0.8377 | 257  | 506  | 409  | 296  | 155  | 252  | 359  | 299  | 95   | 243  |
| <b>Slc38a10</b> | -0.2554 | 7.035  | 5.346  | 0.0208 | 0.6899 | 715  | 958  | 836  | 583  | 301  | 518  | 608  | 660  | 226  | 572  |
| <b>Bbx</b>      | -0.2541 | 6.7857 | 3.9761 | 0.0461 | 0.8611 | 727  | 931  | 682  | 617  | 325  | 606  | 586  | 465  | 286  | 528  |
| <b>Eif4e</b>    | -0.2537 | 6.1726 | 5.4116 | 0.02   | 0.6772 | 269  | 363  | 375  | 249  | 160  | 201  | 334  | 231  | 120  | 209  |
| <b>Vps37a</b>   | -0.2532 | 6.0151 | 4.638  | 0.0313 | 0.7726 | 275  | 390  | 413  | 255  | 161  | 221  | 310  | 254  | 98   | 275  |
| <b>Numa1</b>    | -0.2527 | 6.5646 | 4.0813 | 0.0434 | 0.85   | 620  | 879  | 769  | 620  | 322  | 584  | 624  | 521  | 256  | 455  |
| <b>Fam133b</b>  | -0.2508 | 6.6326 | 4.3138 | 0.0378 | 0.8131 | 526  | 702  | 711  | 552  | 241  | 534  | 556  | 453  | 182  | 370  |
| <b>Alad</b>     | -0.2508 | 6.0257 | 4.8465 | 0.0277 | 0.747  | 442  | 576  | 512  | 422  | 237  | 336  | 570  | 308  | 166  | 342  |
| <b>Thoc2</b>    | -0.2496 | 8.2647 | 5.236  | 0.0221 | 0.6995 | 2219 | 3648 | 3092 | 2494 | 1235 | 2139 | 2852 | 2372 | 881  | 1563 |
| <b>Birc6</b>    | -0.2484 | 7.1604 | 8.3393 | 0.0039 | 0.3742 | 585  | 917  | 912  | 719  | 387  | 478  | 729  | 659  | 287  | 565  |
| <b>Bod1l</b>    | -0.2483 | 8.086  | 4.3157 | 0.0378 | 0.8131 | 1033 | 1438 | 1167 | 1038 | 548  | 916  | 1244 | 959  | 372  | 612  |
| <b>Them6</b>    | -0.2479 | 7.4903 | 4.0539 | 0.0441 | 0.8533 | 286  | 371  | 359  | 300  | 132  | 211  | 298  | 261  | 137  | 192  |
| <b>Mafb</b>     | -0.2458 | 6.2144 | 3.8912 | 0.0485 | 0.8678 | 635  | 1045 | 914  | 655  | 392  | 490  | 722  | 492  | 360  | 667  |
| <b>Phf14</b>    | -0.2441 | 7.5004 | 5.2274 | 0.0222 | 0.6995 | 1276 | 2018 | 1957 | 1430 | 857  | 1289 | 1660 | 1423 | 561  | 949  |
| <b>Arrdc1</b>   | -0.2437 | 5.4542 | 3.9237 | 0.0476 | 0.8678 | 255  | 472  | 450  | 339  | 158  | 232  | 325  | 352  | 121  | 252  |
| <b>Mycbp2</b>   | -0.2431 | 8.7575 | 6.4491 | 0.0111 | 0.5501 | 1963 | 3120 | 3003 | 2205 | 1151 | 1777 | 2563 | 2107 | 914  | 1441 |
| <b>Micall1</b>  | -0.2417 | 6.4287 | 4.2707 | 0.0388 | 0.8196 | 708  | 949  | 959  | 632  | 347  | 584  | 757  | 643  | 254  | 547  |
| <b>Chd6</b>     | -0.2415 | 7.0756 | 4.8546 | 0.0276 | 0.7469 | 625  | 1027 | 819  | 679  | 368  | 593  | 748  | 629  | 233  | 547  |
| <b>Zfp445</b>   | -0.2391 | 6.6691 | 6.2734 | 0.0123 | 0.5734 | 441  | 718  | 691  | 550  | 291  | 398  | 547  | 487  | 242  | 393  |
| <b>Ankrd11</b>  | -0.2365 | 8.9267 | 4.5872 | 0.0322 | 0.7798 | 2696 | 3930 | 3692 | 2473 | 1442 | 2499 | 3196 | 2784 | 1038 | 1566 |
| <b>Cpt1a</b>    | -0.2358 | 6.7327 | 5.0639 | 0.0244 | 0.7207 | 542  | 736  | 687  | 629  | 287  | 514  | 522  | 465  | 209  | 529  |
| <b>Akap11</b>   | -0.2345 | 7.0718 | 3.921  | 0.0477 | 0.8678 | 196  | 253  | 265  | 164  | 149  | 143  | 225  | 170  | 105  | 164  |
| <b>Dnajc2</b>   | -0.232  | 6.628  | 4.0462 | 0.0443 | 0.8549 | 510  | 752  | 733  | 540  | 296  | 513  | 652  | 469  | 211  | 373  |
| <b>Rsf1</b>     | -0.2307 | 6.988  | 4.7856 | 0.0287 | 0.7541 | 735  | 961  | 862  | 744  | 364  | 642  | 808  | 657  | 270  | 508  |
| <b>Ptprd</b>    | -0.229  | 6.2796 | 3.9127 | 0.0479 | 0.8678 | 376  | 688  | 607  | 474  | 295  | 373  | 552  | 404  | 157  | 465  |
| <b>Ppfibp1</b>  | -0.2274 | 6.6585 | 4.1255 | 0.0422 | 0.8429 | 805  | 1030 | 874  | 662  | 558  | 609  | 664  | 646  | 417  | 716  |
| <b>Dnmt3a</b>   | -0.2271 | 5.9027 | 3.9596 | 0.0466 | 0.8665 | 331  | 421  | 451  | 325  | 193  | 300  | 365  | 337  | 121  | 243  |
| <b>Cytip2</b>   | -0.2211 | 7.3939 | 4.3817 | 0.0363 | 0.811  | 480  | 902  | 765  | 554  | 307  | 465  | 585  | 564  | 265  | 427  |
| <b>Dnttip2</b>  | -0.2208 | 5.9694 | 4.4141 | 0.0356 | 0.811  | 369  | 526  | 466  | 318  | 214  | 283  | 347  | 382  | 160  | 307  |
| <b>Prdm2</b>    | -0.2196 | 6.7429 | 4.4897 | 0.0341 | 0.7976 | 588  | 747  | 783  | 523  | 321  | 504  | 731  | 517  | 203  | 425  |
| <b>Ino80d</b>   | -0.2195 | 5.9209 | 4.1205 | 0.0424 | 0.8429 | 360  | 586  | 517  | 467  | 226  | 339  | 461  | 448  | 168  | 286  |
| <b>Frg1</b>     | -0.2194 | 7.2484 | 4.0575 | 0.044  | 0.8533 | 1330 | 1776 | 1528 | 1101 | 602  | 1231 | 1305 | 1067 | 460  | 893  |
| <b>Wdfy2</b>    | -0.2175 | 5.9822 | 3.8771 | 0.0489 | 0.8696 | 157  | 250  | 222  | 179  | 120  | 140  | 189  | 151  | 99   | 149  |
| <b>Arid4a</b>   | -0.2173 | 7.2888 | 3.8893 | 0.0486 | 0.8678 | 1069 | 1608 | 1479 | 1138 | 539  | 1058 | 1125 | 1183 | 386  | 825  |
| <b>Synj1</b>    | -0.2161 | 7.745  | 4.2533 | 0.0392 | 0.8222 | 286  | 304  | 347  | 228  | 172  | 216  | 310  | 269  | 101  | 186  |
| <b>Dgkh</b>     | -0.2157 | 8.8139 | 4.6557 | 0.031  | 0.7726 | 262  | 380  | 286  | 253  | 168  | 194  | 343  | 219  | 115  | 213  |
| <b>Ncor1</b>    | -0.2153 | 8.8018 | 4.9966 | 0.0254 | 0.7274 | 2433 | 3763 | 3485 | 2444 | 1554 | 2347 | 2930 | 2575 | 1162 | 1724 |
| <b>Tmcc1</b>    | -0.2148 | 5.6158 | 4.1894 | 0.0407 | 0.8329 | 237  | 294  | 282  | 229  | 109  | 184  | 235  | 215  | 86   | 191  |

|                 |         |        |        |        |        |      |      |      |      |      |      |      |      |      |      |
|-----------------|---------|--------|--------|--------|--------|------|------|------|------|------|------|------|------|------|------|
| <b>Utrn</b>     | -0.2144 | 8.8286 | 4.3549 | 0.0369 | 0.8131 | 1648 | 2483 | 2278 | 1826 | 969  | 1488 | 2016 | 1775 | 755  | 1224 |
| <b>Jund</b>     | -0.2134 | 7.7794 | 4.8022 | 0.0284 | 0.7519 | 1156 | 1564 | 1700 | 1024 | 602  | 930  | 1288 | 1046 | 530  | 904  |
| <b>Polr3g</b>   | -0.213  | 6.6272 | 3.9577 | 0.0467 | 0.8665 | 477  | 585  | 552  | 473  | 276  | 427  | 444  | 428  | 186  | 400  |
| <b>U2surp</b>   | -0.2127 | 7.3757 | 4.4189 | 0.0355 | 0.811  | 867  | 1296 | 1245 | 964  | 509  | 787  | 1113 | 919  | 405  | 631  |
| <b>Prrc2c</b>   | -0.2109 | 9.0359 | 4.2105 | 0.0402 | 0.8291 | 3089 | 4804 | 4319 | 3142 | 1595 | 2898 | 3825 | 3197 | 1301 | 2080 |
| <b>Acbd5</b>    | -0.2098 | 6.3302 | 4.3161 | 0.0378 | 0.8131 | 238  | 385  | 333  | 264  | 146  | 206  | 309  | 243  | 101  | 230  |
| <b>Nfib</b>     | -0.2093 | 7.3966 | 4.7805 | 0.0288 | 0.7541 | 844  | 1177 | 1076 | 835  | 436  | 735  | 985  | 762  | 297  | 722  |
| <b>Pcm1</b>     | -0.2084 | 7.8335 | 4.9841 | 0.0256 | 0.7316 | 1069 | 1529 | 1516 | 1126 | 760  | 1032 | 1364 | 1220 | 471  | 772  |
| <b>Gls</b>      | -0.1996 | 7.8291 | 5.3955 | 0.0202 | 0.6801 | 1112 | 2024 | 1509 | 1270 | 736  | 1037 | 1546 | 1147 | 506  | 1109 |
| <b>Zbtb20</b>   | -0.1964 | 8.7922 | 4.4402 | 0.0351 | 0.8064 | 1467 | 1935 | 2040 | 1314 | 725  | 1124 | 1673 | 1411 | 586  | 1176 |
| <b>Aktip</b>    | -0.196  | 6.9541 | 3.891  | 0.0485 | 0.8678 | 465  | 716  | 675  | 527  | 285  | 414  | 639  | 426  | 210  | 461  |
| <b>Zdhhc20</b>  | -0.1867 | 6.4771 | 4.1092 | 0.0427 | 0.8447 | 563  | 938  | 754  | 610  | 326  | 478  | 690  | 565  | 277  | 534  |
| <b>Wbp11</b>    | -0.1865 | 6.4727 | 3.9356 | 0.0473 | 0.8678 | 469  | 733  | 635  | 471  | 258  | 408  | 576  | 454  | 192  | 438  |
| <b>Hnrnpul2</b> | -0.1812 | 6.9233 | 4.0746 | 0.0435 | 0.85   | 773  | 1085 | 1034 | 818  | 460  | 661  | 978  | 777  | 310  | 702  |
| <b>Huwe1</b>    | -0.1753 | 8.4917 | 4.0139 | 0.0451 | 0.8577 | 1767 | 2761 | 2576 | 1973 | 1185 | 1553 | 2611 | 1964 | 849  | 1481 |
| <b>Mapre2</b>   | -0.1727 | 7.747  | 3.9263 | 0.0475 | 0.8678 | 405  | 694  | 592  | 458  | 284  | 396  | 463  | 454  | 238  | 397  |
| <b>Nfe2l2</b>   | -0.169  | 6.7678 | 3.8876 | 0.0486 | 0.8681 | 646  | 980  | 891  | 663  | 452  | 617  | 853  | 645  | 269  | 639  |
| <b>Ube3a</b>    | -0.1657 | 7.6096 | 4.2559 | 0.0391 | 0.8215 | 698  | 1071 | 1024 | 762  | 387  | 628  | 917  | 711  | 318  | 639  |

**Table S3. Differentially expressed genes in the cornea of miR-183C KO vs age- and sex-matched WT control mice.**

| Gene                     | log2FC   | logCPM   | LR       | PValue      | FDR      | WT1 | WT2 | WT3 | KO1 | KO2 | KO3  |
|--------------------------|----------|----------|----------|-------------|----------|-----|-----|-----|-----|-----|------|
| <b>Upregulated genes</b> |          |          |          |             |          |     |     |     |     |     |      |
| Gbp1                     | 10.09237 | 2.002584 | 23.22829 | 1.43865E-06 | 0.000755 | 0   | 0   | 0   | 0   | 235 | 102  |
| Sprr2f                   | 8.356159 | 0.048928 | 17.44497 | 2.95745E-05 | 0.006917 | 0   | 0   | 0   | 1   | 63  | 33   |
| Ccl8                     | 8.26459  | 0.444292 | 15.75058 | 7.2266E-05  | 0.012641 | 0   | 0   | 0   | 4   | 14  | 49   |
| Saa3                     | 7.973225 | 4.381648 | 19.12251 | 1.22591E-05 | 0.003598 | 11  | 2   | 0   | 1   | 512 | 1115 |
| 2310002L1                | 7.717483 | 0.938009 | 33.98515 | 5.55342E-09 | 9.19E-06 | 1   | 0   | 0   | 18  | 85  | 75   |
| Sprr2d                   | 6.861787 | -1.21987 | 5.252055 | 0.021920874 | 0.493874 | 0   | 0   | 0   | 0   | 9   | 18   |
| Pcdhb10                  | 6.639641 | -0.58049 | 10.2572  | 0.001361524 | 0.095112 | 0   | 0   | 0   | 6   | 0   | 14   |
| Cxcr2                    | 6.602779 | -1.28345 | 5.182495 | 0.022815538 | 0.50504  | 0   | 0   | 0   | 7   | 1   | 12   |
| Ccl5                     | 6.443421 | 0.20881  | 15.08569 | 0.000102739 | 0.016621 | 0   | 0   | 0   | 7   | 0   | 11   |
| 4933422H                 | 6.379781 | -0.70556 | 9.563529 | 0.001984812 | 0.12307  | 0   | 0   | 0   | 1   | 13  | 9    |
| Fgr                      | 6.369988 | -1.12429 | 6.597586 | 0.010211714 | 0.320752 | 0   | 0   | 0   | 0   | 6   | 13   |
| Hist1h3c                 | 6.367877 | -1.13506 | 4.237244 | 0.039546303 | 0.656542 | 0   | 0   | 0   | 0   | 8   | 12   |
| Ncf4                     | 6.3279   | -0.53097 | 12.53011 | 0.000400446 | 0.043515 | 0   | 0   | 0   | 10  | 6   | 4    |
| Pou6f2                   | 6.3131   | 0.229875 | 11.69114 | 0.000627984 | 0.059003 | 0   | 0   | 0   | 6   | 21  | 0    |
| 7530420F2                | 6.304496 | -1.51512 | 4.356335 | 0.036871549 | 0.6367   | 0   | 0   | 0   | 6   | 4   | 8    |
| Lrg1                     | 6.175243 | 0.018776 | 9.700806 | 0.001841872 | 0.117946 | 0   | 0   | 0   | 0   | 0   | 14   |
| Sgk2                     | 6.157538 | -0.09919 | 13.61441 | 0.000224457 | 0.028746 | 0   | 0   | 0   | 0   | 16  | 6    |
| Hhex                     | 6.119511 | 0.066129 | 9.181364 | 0.002444917 | 0.139459 | 0   | 0   | 0   | 12  | 0   | 3    |
| Mak                      | 5.995725 | -0.76892 | 6.099519 | 0.013521871 | 0.376391 | 0   | 0   | 0   | 6   | 0   | 7    |
| Chi3l1                   | 5.94974  | 2.384754 | 35.84776 | 2.13353E-09 | 4.45E-06 | 6   | 5   | 0   | 15  | 120 | 239  |
| Wdr64                    | 5.93475  | -1.50541 | 3.863045 | 0.049360676 | 0.721988 | 0   | 0   | 0   | 3   | 0   | 9    |
| Grik1                    | 5.924846 | 6.098558 | 29.54174 | 5.47255E-08 | 5.89E-05 | 0   | 0   | 0   | 11  | 0   | 5    |
| Cxcr6                    | 5.92031  | -0.59604 | 6.874043 | 0.008745657 | 0.295349 | 0   | 0   | 0   | 5   | 9   | 3    |
| Prkag3                   | 5.750946 | -0.42192 | 7.881845 | 0.004993352 | 0.218288 | 0   | 0   | 0   | 3   | 16  | 0    |
| Rgs9bp                   | 5.749296 | -0.70573 | 10.18337 | 0.001417129 | 0.09727  | 0   | 0   | 0   | 8   | 5   | 1    |
| Mx1                      | 5.746517 | -1.04078 | 6.739835 | 0.009428332 | 0.307123 | 0   | 0   | 0   | 4   | 8   | 3    |
| Rwdd2a                   | 5.720253 | 1.728077 | 20.74556 | 5.24529E-06 | 0.00182  | 0   | 0   | 0   | 0   | 13  | 3    |
| Saa2                     | 5.70446  | -1.28416 | 5.290356 | 0.021443831 | 0.489181 | 0   | 0   | 0   | 0   | 2   | 9    |
| Uprt                     | 5.687273 | -1.37855 | 4.577399 | 0.032396354 | 0.598041 | 0   | 0   | 0   | 5   | 1   | 5    |
| Esam                     | 5.675584 | 3.650066 | 23.86966 | 1.03084E-06 | 0.000616 | 0   | 0   | 0   | 5   | 7   | 2    |
| Ppp1r16b                 | 5.653209 | 3.421284 | 23.38692 | 1.32476E-06 | 0.00075  | 0   | 0   | 0   | 6   | 8   | 0    |
| Rlbp1                    | 5.533137 | 1.700564 | 16.98991 | 3.75791E-05 | 0.008194 | 0   | 0   | 0   | 6   | 4   | 2    |
| A230057D                 | 5.475982 | -0.73309 | 7.097883 | 0.007717505 | 0.277675 | 0   | 0   | 0   | 3   | 0   | 6    |
| Pex5l                    | 5.44122  | 5.475629 | 21.7388  | 3.12408E-06 | 0.001293 | 0   | 0   | 0   | 0   | 9   | 3    |
| Zdbf2                    | 5.393512 | 2.411139 | 16.29221 | 5.42867E-05 | 0.010069 | 0   | 0   | 0   | 8   | 0   | 2    |
| Myrip                    | 5.382911 | 1.506843 | 15.27673 | 9.28533E-05 | 0.015564 | 0   | 0   | 0   | 0   | 11  | 2    |
| Zfp389                   | 5.370773 | -0.24856 | 10.37877 | 0.001274729 | 0.090518 | 0   | 0   | 0   | 0   | 8   | 4    |
| Ak5                      | 5.360171 | 3.171656 | 19.10449 | 1.23753E-05 | 0.003598 | 0   | 0   | 0   | 6   | 4   | 1    |
| 4932438H                 | 5.346251 | -1.00422 | 3.980559 | 0.046028291 | 0.703111 | 0   | 0   | 0   | 0   | 10  | 3    |
| Pacrg                    | 5.343496 | 2.252178 | 16.99275 | 3.75227E-05 | 0.008194 | 0   | 0   | 0   | 0   | 13  | 0    |
| Fbxl2                    | 5.269457 | 3.691976 | 18.7582  | 1.48384E-05 | 0.004041 | 0   | 0   | 0   | 1   | 10  | 0    |
| Pla2g4e                  | 5.220657 | 0.702564 | 9.505974 | 0.002048041 | 0.125775 | 0   | 0   | 0   | 0   | 1   | 7    |
| Edil3                    | 5.202587 | 5.849651 | 18.45536 | 1.73931E-05 | 0.004564 | 0   | 0   | 0   | 4   | 5   | 1    |
| Npy1r                    | 5.186344 | 2.420129 | 38.38609 | 5.80445E-10 | 1.39E-06 | 0   | 0   | 1   | 6   | 14  | 12   |
| U46068                   | 5.183956 | -0.52745 | 7.211901 | 0.007242176 | 0.266447 | 0   | 0   | 0   | 0   | 10  | 2    |
| Slamf7                   | 5.180348 | -0.95919 | 3.869129 | 0.049182027 | 0.720347 | 0   | 0   | 0   | 1   | 0   | 6    |
| 1810033B1                | 5.175067 | -1.12769 | 4.325194 | 0.037552136 | 0.642723 | 0   | 0   | 0   | 1   | 0   | 6    |
| L3mbtl                   | 5.163921 | -0.07966 | 8.11534  | 0.004389225 | 0.201764 | 0   | 0   | 0   | 8   | 0   | 0    |
| Gm765                    | 5.15392  | 4.301888 | 16.57436 | 4.67792E-05 | 0.009234 | 0   | 0   | 0   | 0   | 0   | 9    |
| Mfi2                     | 5.151305 | -0.81799 | 5.606715 | 0.017891778 | 0.446595 | 0   | 0   | 0   | 5   | 5   | 0    |
| Dio2                     | 5.143224 | 0.415158 | 10.96389 | 0.000929047 | 0.075755 | 0   | 0   | 0   | 2   | 6   | 2    |
| 6430531B1                | 5.099276 | -0.02104 | 7.255065 | 0.007070131 | 0.26273  | 0   | 0   | 0   | 0   | 13  | 0    |
| Fgf7                     | 5.084813 | 1.817515 | 13.65473 | 0.000219687 | 0.028386 | 0   | 0   | 0   | 0   | 11  | 0    |
| Tagln3                   | 5.081802 | 6.733713 | 16.91874 | 3.90145E-05 | 0.00823  | 0   | 0   | 0   | 0   | 0   | 9    |
| Dpf3                     | 5.068098 | 0.405608 | 9.948573 | 0.001609742 | 0.105918 | 0   | 0   | 0   | 0   | 12  | 0    |
| Lrrc2                    | 5.053625 | -0.65481 | 4.990024 | 0.025493856 | 0.530489 | 0   | 0   | 0   | 0   | 13  | 0    |
| Amhr2                    | 5.03855  | 0.179765 | 9.736196 | 0.001806744 | 0.116389 | 0   | 0   | 0   | 0   | 10  | 1    |
| Ubxn10                   | 5.037601 | -1.10802 | 4.09973  | 0.042890058 | 0.684586 | 0   | 0   | 0   | 0   | 13  | 0    |
| Krt27                    | 5.02839  | 1.17352  | 11.87111 | 0.000570114 | 0.054518 | 0   | 0   | 0   | 0   | 11  | 0    |
| Snap91                   | 5.023318 | 5.80678  | 16.32951 | 5.32285E-05 | 0.009983 | 0   | 0   | 0   | 0   | 9   | 0    |
| Atp6v1c2                 | 4.983194 | 0.258496 | 6.564602 | 0.010402698 | 0.323446 | 0   | 0   | 0   | 7   | 0   | 0    |
| Rgs6                     | 4.978817 | -0.48996 | 6.960726 | 0.00833182  | 0.287118 | 0   | 0   | 0   | 7   | 0   | 0    |

|           |          |          |          |             |          |     |    |    |     |      |      |
|-----------|----------|----------|----------|-------------|----------|-----|----|----|-----|------|------|
| Gjb1      | 4.974874 | 4.454483 | 15.26733 | 9.33167E-05 | 0.015564 | 0   | 0  | 0  | 0   | 9    | 0    |
| Pgf       | 4.959289 | 2.465709 | 14.39961 | 0.000147833 | 0.021936 | 0   | 0  | 0  | 0   | 8    | 1    |
| Mmp3      | 4.956893 | 2.454486 | 10.97496 | 0.000923514 | 0.075755 | 2   | 16 | 7  | 0   | 98   | 330  |
| Gp49a     | 4.956206 | -0.65893 | 5.246126 | 0.021995688 | 0.494008 | 0   | 0  | 0  | 0   | 10   | 1    |
| 4921523A1 | 4.934342 | -0.89314 | 4.239155 | 0.039501827 | 0.656377 | 0   | 0  | 0  | 0   | 12   | 0    |
| Gbp5      | 4.916291 | 1.520429 | 12.08698 | 0.000507752 | 0.050813 | 0   | 0  | 0  | 2   | 7    | 0    |
| Rasgef1a  | 4.911904 | 6.019029 | 14.98281 | 0.000108495 | 0.017292 | 0   | 0  | 0  | 8   | 0    | 0    |
| Nrn1      | 4.882861 | 7.773578 | 14.87916 | 0.000114622 | 0.018134 | 0   | 0  | 0  | 2   | 6    | 0    |
| Cdh5      | 4.863886 | 2.841098 | 12.57166 | 0.000391641 | 0.04294  | 0   | 0  | 0  | 0   | 0    | 7    |
| Nxph3     | 4.861682 | 1.69664  | 12.61465 | 0.000382735 | 0.04223  | 0   | 0  | 0  | 0   | 9    | 0    |
| Tmem59l   | 4.860239 | 5.14902  | 14.5423  | 0.000137048 | 0.020707 | 0   | 0  | 0  | 0   | 8    | 0    |
| Gucy2e    | 4.838408 | -0.73669 | 5.724256 | 0.016732127 | 0.429604 | 0   | 0  | 0  | 0   | 5    | 3    |
| Flt4      | 4.82291  | -0.03489 | 8.605733 | 0.003351064 | 0.17208  | 0   | 0  | 0  | 0   | 10   | 0    |
| Kcnmb3    | 4.810606 | -0.87717 | 4.775012 | 0.028875648 | 0.563783 | 0   | 0  | 0  | 5   | 0    | 1    |
| Tnni3     | 4.80408  | 0.163007 | 12.20915 | 0.000475556 | 0.048493 | 0   | 1  | 0  | 12  | 16   | 0    |
| Slc6a1    | 4.798541 | 2.773073 | 12.78164 | 0.000350037 | 0.039849 | 0   | 0  | 0  | 3   | 0    | 4    |
| Aim2      | 4.782379 | -0.00985 | 8.108179 | 0.004406598 | 0.201764 | 0   | 0  | 0  | 1   | 3    | 3    |
| Hcrr1     | 4.769603 | -0.18528 | 7.408759 | 0.006490707 | 0.250929 | 0   | 0  | 0  | 3   | 5    | 0    |
| Gimap5    | 4.767531 | -0.48243 | 5.710275 | 0.016865896 | 0.431494 | 0   | 0  | 0  | 6   | 0    | 0    |
| Fam163b   | 4.756185 | 0.798073 | 9.935269 | 0.001621418 | 0.106361 | 0   | 0  | 0  | 0   | 9    | 0    |
| Rnf165    | 4.751772 | 2.151821 | 12.37312 | 0.00043556  | 0.045661 | 0   | 0  | 0  | 0   | 8    | 0    |
| Samsn1    | 4.747829 | 1.704378 | 11.5543  | 0.000675926 | 0.062151 | 0   | 0  | 0  | 0   | 3    | 4    |
| Fibcd1    | 4.741054 | -0.15127 | 7.37113  | 0.006627926 | 0.2542   | 0   | 0  | 0  | 6   | 0    | 0    |
| BC020535  | 4.739941 | 0.219003 | 7.425428 | 0.006430852 | 0.250929 | 0   | 0  | 0  | 6   | 0    | 0    |
| Pap0lb    | 4.722821 | 0.458588 | 9.042229 | 0.002638138 | 0.148592 | 0   | 0  | 0  | 0   | 9    | 0    |
| Pde6b     | 4.707457 | -1.00613 | 4.348295 | 0.037046012 | 0.637156 | 0   | 0  | 0  | 0   | 0    | 5    |
| AW551984  | 4.696666 | -0.71316 | 4.776814 | 0.028845448 | 0.563705 | 0   | 0  | 0  | 0   | 0    | 5    |
| Nat8      | 4.674652 | -1.34499 | 4.451972 | 0.034860966 | 0.620918 | 0   | 0  | 0  | 5   | 1    | 0    |
| Eya1      | 4.670104 | 1.593564 | 10.61138 | 0.001123938 | 0.083102 | 0   | 0  | 0  | 0   | 8    | 0    |
| Ncam2     | 4.641328 | 4.10654  | 40.89947 | 1.60264E-10 | 4.31E-07 | 2   | 0  | 0  | 0   | 30   | 11   |
| Plvap     | 4.635919 | 2.097824 | 10.15161 | 0.001441751 | 0.098167 | 0   | 0  | 0  | 6   | 0    | 0    |
| Il10ra    | 4.632594 | 0.847234 | 19.91836 | 8.08203E-06 | 0.002596 | 0   | 0  | 2  | 7   | 13   | 15   |
| Krt16     | 4.62214  | 6.024555 | 25.45291 | 4.53312E-07 | 0.000287 | 301 | 72 | 29 | 104 | 2852 | 2599 |
| BC026585  | 4.610732 | -0.71723 | 5.805667 | 0.015974606 | 0.416022 | 0   | 0  | 0  | 0   | 9    | 0    |
| Moxd1     | 4.604183 | 3.01317  | 28.74754 | 8.24546E-08 | 8.06E-05 | 1   | 0  | 0  | 6   | 16   | 1    |
| Ctla2b    | 4.582871 | -0.51044 | 6.797502 | 0.009128551 | 0.302732 | 0   | 0  | 0  | 0   | 5    | 2    |
| Adora2a   | 4.581537 | 2.201736 | 11.10543 | 0.000860752 | 0.072627 | 0   | 0  | 0  | 0   | 7    | 0    |
| Shank3    | 4.568202 | 0.632208 | 7.660052 | 0.005645688 | 0.232403 | 0   | 0  | 0  | 0   | 0    | 5    |
| Slc17a8   | 4.566284 | 1.77818  | 10.8273  | 0.001000145 | 0.077407 | 0   | 0  | 0  | 0   | 7    | 0    |
| Lilra5    | 4.557779 | -0.27213 | 6.498984 | 0.010793615 | 0.330635 | 0   | 0  | 0  | 4   | 2    | 0    |
| Galnt6    | 4.538393 | 1.357054 | 9.177513 | 0.002450068 | 0.139459 | 0   | 0  | 0  | 4   | 2    | 0    |
| Myt1l     | 4.504685 | 6.609825 | 11.28124 | 0.000782943 | 0.068758 | 0   | 0  | 0  | 6   | 0    | 0    |
| Nrxn3     | 4.501898 | 6.083184 | 11.24136 | 0.000799946 | 0.069123 | 0   | 0  | 0  | 5   | 1    | 0    |
| Elavl4    | 4.501532 | 8.809614 | 11.29743 | 0.000776144 | 0.068441 | 0   | 0  | 0  | 6   | 0    | 0    |
| Syt2      | 4.482555 | 6.975247 | 11.16683 | 0.000832729 | 0.071099 | 0   | 0  | 0  | 1   | 5    | 0    |
| Ltc4s     | 4.467936 | 0.174699 | 6.893584 | 0.008650565 | 0.29395  | 0   | 0  | 0  | 5   | 0    | 0    |
| Golga7b   | 4.461519 | 4.738399 | 10.90931 | 0.000956819 | 0.075755 | 0   | 0  | 0  | 0   | 6    | 0    |
| Cacna1e   | 4.447176 | 0.660783 | 7.43869  | 0.006383633 | 0.250156 | 0   | 0  | 0  | 5   | 0    | 0    |
| Kcnh7     | 4.444156 | 2.97639  | 10.37948 | 0.001274234 | 0.090518 | 0   | 0  | 0  | 0   | 5    | 1    |
| Kcnn2     | 4.40959  | 1.000976 | 8.134926 | 0.004342062 | 0.201618 | 0   | 0  | 0  | 5   | 0    | 0    |
| Dgkk      | 4.398428 | 2.509731 | 9.978912 | 0.001583432 | 0.105305 | 0   | 0  | 0  | 0   | 6    | 0    |
| Syt15     | 4.379065 | 0.051903 | 7.13211  | 0.007571556 | 0.273798 | 0   | 0  | 0  | 0   | 7    | 0    |
| Trim15    | 4.364975 | -0.76866 | 5.649715 | 0.017458208 | 0.439849 | 1   | 0  | 0  | 11  | 6    | 0    |
| She       | 4.355982 | 2.147845 | 9.322478 | 0.002263597 | 0.13454  | 0   | 0  | 0  | 0   | 6    | 0    |
| Tub       | 4.351791 | -0.28171 | 6.31507  | 0.011971602 | 0.348553 | 0   | 0  | 0  | 0   | 2    | 3    |
| Hs6st3    | 4.343562 | -1.07904 | 4.948584 | 0.026112041 | 0.537119 | 0   | 0  | 0  | 0   | 0    | 4    |
| Camk1g    | 4.277419 | 4.200058 | 9.378327 | 0.002195658 | 0.131573 | 0   | 0  | 0  | 0   | 0    | 5    |
| Ap3b2     | 4.253686 | 7.303381 | 9.429588 | 0.002135123 | 0.129043 | 0   | 0  | 0  | 0   | 0    | 5    |
| Cyb5r2    | 4.241351 | 0.352231 | 6.337309 | 0.011822408 | 0.345613 | 0   | 0  | 0  | 0   | 0    | 4    |
| Dhh       | 4.236613 | 5.000854 | 9.265028 | 0.002335709 | 0.135357 | 0   | 0  | 0  | 2   | 3    | 0    |
| 3110047P2 | 4.225653 | 5.464965 | 9.261468 | 0.002340254 | 0.135357 | 0   | 0  | 0  | 0   | 5    | 0    |
| Adam5     | 4.224937 | -0.70408 | 5.140363 | 0.023375754 | 0.512172 | 0   | 0  | 0  | 1   | 5    | 0    |
| Cd300a    | 4.21381  | -0.40745 | 5.168377 | 0.023001691 | 0.506052 | 0   | 0  | 0  | 3   | 0    | 1    |
| Adamts8   | 4.201214 | 0.657948 | 15.67819 | 7.5085E-05  | 0.012993 | 0   | 2  | 0  | 5   | 13   | 10   |
| Gm5820    | 4.19983  | -0.61051 | 4.286623 | 0.038413381 | 0.646227 | 0   | 0  | 0  | 4   | 0    | 0    |

|           |          |          |          |             |          |    |    |    |    |     |     |
|-----------|----------|----------|----------|-------------|----------|----|----|----|----|-----|-----|
| C130060K2 | 4.199736 | -0.50246 | 4.290893 | 0.038317039 | 0.646227 | 0  | 0  | 0  | 4  | 0   | 0   |
| Impg2     | 4.198973 | -0.97926 | 4.325085 | 0.037554542 | 0.642723 | 0  | 0  | 0  | 4  | 0   | 0   |
| Cd38      | 4.195857 | 0.626359 | 6.690796 | 0.009691192 | 0.311217 | 0  | 0  | 0  | 0  | 0   | 4   |
| Elt1      | 4.181824 | 3.087958 | 8.734448 | 0.003122538 | 0.165982 | 0  | 0  | 0  | 0  | 5   | 0   |
| Pde1a     | 4.168494 | 3.233693 | 19.22397 | 1.16244E-05 | 0.003474 | 0  | 0  | 1  | 4  | 3   | 8   |
| Ccdc85a   | 4.166248 | 3.167227 | 8.54149  | 0.003471414 | 0.176158 | 0  | 0  | 0  | 0  | 5   | 0   |
| Nppa      | 4.149743 | 0.347473 | 5.810464 | 0.015931092 | 0.416022 | 0  | 0  | 0  | 4  | 0   | 0   |
| Tmprss5   | 4.136663 | 2.45455  | 8.167062 | 0.004265796 | 0.199528 | 0  | 0  | 0  | 0  | 5   | 0   |
| Col2a1    | 4.136177 | 0.239291 | 6.064741 | 0.013790701 | 0.3809   | 0  | 0  | 0  | 4  | 0   | 0   |
| Rasal3    | 4.128793 | -0.76602 | 3.977593 | 0.046109422 | 0.703111 | 0  | 0  | 0  | 2  | 3   | 0   |
| Scml4     | 4.099487 | 1.131376 | 6.578674 | 0.010320774 | 0.323011 | 0  | 0  | 0  | 4  | 0   | 0   |
| Fam163a   | 4.071937 | -0.85019 | 5.313843 | 0.021156633 | 0.485812 | 0  | 0  | 0  | 2  | 1   | 1   |
| 4833422C1 | 4.056722 | -0.69996 | 3.948056 | 0.046925536 | 0.705555 | 0  | 0  | 0  | 0  | 6   | 0   |
| Actn3     | 4.031662 | -0.28593 | 5.108281 | 0.023811898 | 0.516307 | 1  | 0  | 0  | 0  | 0   | 10  |
| Tlr13     | 4.021227 | 0.14316  | 8.806814 | 0.003001076 | 0.162648 | 1  | 0  | 0  | 0  | 12  | 4   |
| Inha      | 4.019217 | 1.723893 | 25.83695 | 3.71507E-07 | 0.000266 | 3  | 0  | 0  | 8  | 24  | 5   |
| Rab39b    | 3.999246 | 5.323002 | 41.26948 | 1.32623E-10 | 4.08E-07 | 1  | 0  | 2  | 13 | 13  | 8   |
| Ly6c2     | 3.99047  | -0.63518 | 4.148326 | 0.041675712 | 0.675222 | 0  | 0  | 0  | 0  | 2   | 2   |
| Slc6a13   | 3.979289 | 3.775231 | 7.414768 | 0.006469067 | 0.250929 | 0  | 0  | 0  | 4  | 0   | 0   |
| Kcnma1    | 3.97421  | 4.275073 | 7.435603 | 0.006394593 | 0.250156 | 0  | 0  | 0  | 4  | 0   | 0   |
| Paqr9     | 3.955466 | 4.606858 | 7.506595 | 0.006147348 | 0.246571 | 0  | 0  | 0  | 4  | 0   | 0   |
| BC048546  | 3.947026 | 6.903502 | 7.54008  | 0.006034137 | 0.243584 | 0  | 0  | 0  | 3  | 0   | 1   |
| Akap6     | 3.938452 | 6.908552 | 7.497964 | 0.006176878 | 0.246571 | 0  | 0  | 0  | 2  | 2   | 0   |
| Cntn2     | 3.930616 | 7.40431  | 7.483613 | 0.006226301 | 0.246811 | 0  | 0  | 0  | 0  | 4   | 0   |
| Cadps     | 3.930336 | 6.727857 | 7.481007 | 0.006235318 | 0.246811 | 0  | 0  | 0  | 0  | 4   | 0   |
| Nipal4    | 3.923638 | -0.33212 | 5.170365 | 0.022975391 | 0.506052 | 0  | 0  | 0  | 0  | 5   | 0   |
| Bcan      | 3.917883 | 5.542172 | 7.364033 | 0.006654137 | 0.254404 | 0  | 0  | 0  | 0  | 4   | 0   |
| Prss12    | 3.910236 | 4.114798 | 7.291381 | 0.006928619 | 0.259331 | 0  | 0  | 0  | 0  | 4   | 0   |
| Ncan      | 3.906468 | 3.823312 | 7.255356 | 0.007068987 | 0.26273  | 0  | 0  | 0  | 0  | 4   | 0   |
| Nkx2-9    | 3.89396  | 0.024651 | 4.706026 | 0.030057057 | 0.575312 | 0  | 0  | 0  | 0  | 5   | 0   |
| Prox1     | 3.884541 | 0.204999 | 4.555503 | 0.032813132 | 0.60291  | 0  | 0  | 0  | 0  | 5   | 0   |
| Atp8a2    | 3.881466 | 3.365143 | 7.012544 | 0.008094057 | 0.283674 | 0  | 0  | 0  | 0  | 4   | 0   |
| Obp1a     | 3.867969 | -0.09074 | 4.649926 | 0.031054886 | 0.584071 | 0  | 0  | 0  | 0  | 0   | 3   |
| 4732456N  | 3.836686 | 3.247104 | 21.59004 | 3.37601E-06 | 0.001369 | 42 | 34 | 15 | 20 | 652 | 255 |
| Fpr2      | 3.836158 | 0.438738 | 11.05988 | 0.000882157 | 0.073854 | 0  | 2  | 0  | 11 | 11  | 1   |
| 1110020A2 | 3.829742 | 0.063903 | 8.94636  | 0.00278023  | 0.153615 | 0  | 0  | 2  | 3  | 22  | 2   |
| Gpr183    | 3.822547 | 0.285883 | 9.289623 | 0.002304556 | 0.135109 | 0  | 0  | 3  | 6  | 18  | 8   |
| P2rx2     | 3.797508 | 0.142551 | 5.075826 | 0.024261714 | 0.519935 | 0  | 0  | 0  | 0  | 0   | 3   |
| Grm3      | 3.794554 | 1.220585 | 6.119214 | 0.013372028 | 0.374139 | 0  | 0  | 0  | 0  | 4   | 0   |
| Hoxd8     | 3.790268 | 1.441202 | 10.36403 | 0.001284947 | 0.090944 | 1  | 0  | 0  | 1  | 14  | 0   |
| Htr1f     | 3.788195 | -0.25295 | 3.87519  | 0.04900475  | 0.720347 | 0  | 0  | 0  | 3  | 0   | 0   |
| Pmfbp1    | 3.752168 | 0.822467 | 10.59408 | 0.001134506 | 0.083596 | 0  | 1  | 0  | 0  | 9   | 4   |
| Itgb2     | 3.746522 | 0.534936 | 7.931561 | 0.004857986 | 0.215071 | 0  | 4  | 0  | 11 | 23  | 8   |
| Kcnh5     | 3.740489 | 0.867971 | 5.526014 | 0.018735736 | 0.454474 | 0  | 0  | 0  | 0  | 4   | 0   |
| Trhde     | 3.738409 | -0.13778 | 4.68722  | 0.030387769 | 0.578093 | 0  | 0  | 0  | 3  | 0   | 0   |
| Gpr22     | 3.732446 | 2.81456  | 13.90779 | 0.000192001 | 0.025927 | 1  | 0  | 0  | 0  | 12  | 1   |
| Ankrd34a  | 3.718407 | 0.832146 | 5.367728 | 0.020512674 | 0.479255 | 0  | 0  | 0  | 0  | 0   | 3   |
| Pvt1      | 3.695138 | 0.934873 | 5.082113 | 0.024173894 | 0.51857  | 0  | 0  | 0  | 3  | 0   | 0   |
| Sema6b    | 3.69273  | 1.18887  | 5.435913 | 0.019726776 | 0.468392 | 0  | 0  | 0  | 0  | 0   | 3   |
| Fgd5      | 3.67361  | 1.133594 | 5.222361 | 0.022298255 | 0.497686 | 0  | 0  | 0  | 3  | 0   | 0   |
| Unc5d     | 3.648659 | 1.117715 | 5.354173 | 0.020672732 | 0.481091 | 0  | 0  | 0  | 3  | 0   | 0   |
| C2cd4c    | 3.647716 | 1.693491 | 5.358628 | 0.020619993 | 0.480976 | 0  | 0  | 0  | 3  | 0   | 0   |
| Pnpla1    | 3.647536 | -0.63421 | 4.786296 | 0.028687046 | 0.562141 | 0  | 4  | 1  | 9  | 19  | 16  |
| Aard      | 3.642018 | 1.754156 | 5.544173 | 0.01854232  | 0.451819 | 0  | 0  | 0  | 0  | 0   | 3   |
| Gm98      | 3.641385 | 2.208234 | 5.545337 | 0.018529992 | 0.451819 | 0  | 0  | 0  | 0  | 0   | 3   |
| Ica1l     | 3.625299 | 1.598758 | 5.455043 | 0.01951192  | 0.466714 | 0  | 0  | 0  | 3  | 0   | 0   |
| Apba2     | 3.56945  | 4.596525 | 5.635201 | 0.017603332 | 0.441171 | 0  | 0  | 0  | 3  | 0   | 0   |
| Cmtm5     | 3.56552  | 5.41229  | 5.645432 | 0.017500905 | 0.440226 | 0  | 0  | 0  | 3  | 0   | 0   |
| Slc17a7   | 3.565249 | 5.470233 | 5.659469 | 0.017361378 | 0.439468 | 0  | 0  | 0  | 0  | 0   | 3   |
| Bet3l     | 3.563772 | 5.667491 | 5.649899 | 0.017456374 | 0.439849 | 0  | 0  | 0  | 3  | 0   | 0   |
| Scn11a    | 3.546935 | 6.851326 | 5.615061 | 0.017806766 | 0.4455   | 0  | 0  | 0  | 0  | 3   | 0   |
| Hs3st2    | 3.539308 | 4.147418 | 5.561457 | 0.018360126 | 0.449928 | 0  | 0  | 0  | 0  | 3   | 0   |
| Sorcs1    | 3.538219 | 4.33729  | 5.55376  | 0.018441031 | 0.450883 | 0  | 0  | 0  | 0  | 3   | 0   |
| Aldh1a2   | 3.533186 | 2.194895 | 5.343506 | 0.020799596 | 0.482246 | 0  | 0  | 0  | 1  | 2   | 0   |
| Gabrg1    | 3.530769 | 4.134488 | 5.500839 | 0.019007352 | 0.458965 | 0  | 0  | 0  | 0  | 3   | 0   |



|           |          |          |          |             |          |     |     |     |     |      |     |
|-----------|----------|----------|----------|-------------|----------|-----|-----|-----|-----|------|-----|
| Dusp15    | 3.529755 | 5.161516 | 5.493596 | 0.019086242 | 0.459461 | 0   | 0   | 0   | 0   | 3    | 0   |
| Was       | 3.525714 | 0.206891 | 5.78444  | 0.016168652 | 0.419417 | 0   | 1   | 0   | 1   | 0    | 7   |
| Ttll11    | 3.504196 | 2.776172 | 21.7714  | 3.07144E-06 | 0.001293 | 3   | 0   | 0   | 8   | 18   | 0   |
| Casp4     | 3.502366 | -0.41485 | 5.958171 | 0.014649227 | 0.396469 | 1   | 0   | 0   | 0   | 6    | 4   |
| 2900041M  | 3.477399 | -0.22777 | 5.508909 | 0.018919846 | 0.457907 | 0   | 1   | 0   | 3   | 9    | 0   |
| Rac2      | 3.475242 | 0.9351   | 8.052812 | 0.004543309 | 0.207106 | 0   | 5   | 0   | 2   | 3    | 26  |
| Crybb1    | 3.454653 | 1.182403 | 4.933082 | 0.026347286 | 0.540924 | 0   | 0   | 0   | 0   | 3    | 0   |
| Pcdhb3    | 3.404226 | 0.66558  | 4.530468 | 0.033296502 | 0.606098 | 0   | 0   | 0   | 0   | 3    | 0   |
| Pitx1     | 3.365286 | 0.517786 | 8.51457  | 0.003523141 | 0.176699 | 12  | 2   | 3   | 28  | 101  | 3   |
| Nr3c2     | 3.360894 | -0.14605 | 4.167826 | 0.041198623 | 0.670522 | 0   | 0   | 0   | 0   | 3    | 0   |
| Hnf1a     | 3.353097 | 0.847314 | 9.123117 | 0.002523995 | 0.142911 | 4   | 0   | 0   | 2   | 11   | 12  |
| Ptpn7     | 3.295345 | -0.11755 | 4.253413 | 0.039171534 | 0.654359 | 3   | 1   | 0   | 5   | 21   | 4   |
| Itgal     | 3.289982 | -0.33098 | 4.060157 | 0.043906419 | 0.690382 | 1   | 0   | 0   | 0   | 4    | 4   |
| Kirrel3   | 3.277683 | 2.928015 | 9.225713 | 0.002386397 | 0.136922 | 1   | 0   | 0   | 8   | 0    | 0   |
| Derl3     | 3.274275 | -0.67328 | 4.178407 | 0.040942156 | 0.668622 | 0   | 3   | 0   | 6   | 14   | 4   |
| Oas2      | 3.264355 | 1.374948 | 12.6424  | 0.000377096 | 0.041823 | 28  | 5   | 3   | 16  | 150  | 59  |
| Sntg1     | 3.255325 | 1.743573 | 9.925329 | 0.001630197 | 0.106612 | 0   | 2   | 0   | 0   | 6    | 8   |
| Timp1     | 3.232747 | 1.256663 | 10.24299 | 0.001372047 | 0.095388 | 16  | 0   | 8   | 9   | 13   | 80  |
| Hist2h2bb | 3.225836 | -0.772   | 3.908    | 0.048056763 | 0.717052 | 0   | 0   | 3   | 3   | 6    | 9   |
| Pnpla3    | 3.215427 | 3.752492 | 18.93694 | 1.35111E-05 | 0.003727 | 0   | 3   | 4   | 26  | 2    | 9   |
| Lyz1      | 3.179529 | 0.379022 | 5.282386 | 0.021542202 | 0.489635 | 6   | 0   | 0   | 0   | 5    | 21  |
| Arhgap9   | 3.16851  | -0.0503  | 6.760034 | 0.009322197 | 0.304924 | 3   | 0   | 0   | 6   | 2    | 7   |
| 4930432K2 | 3.157999 | 1.255494 | 9.953147 | 0.001605747 | 0.105918 | 2   | 0   | 0   | 8   | 5    | 0   |
| Gm4980    | 3.145439 | 5.008337 | 9.271757 | 0.002327143 | 0.135357 | 1   | 0   | 0   | 0   | 8    | 0   |
| Sync      | 3.132256 | 1.04342  | 8.479604 | 0.003591503 | 0.178464 | 0   | 3   | 0   | 0   | 5    | 12  |
| Rundc3b   | 3.107325 | 3.224422 | 8.606602 | 0.003349467 | 0.17208  | 1   | 0   | 0   | 0   | 8    | 0   |
| Hck       | 3.071445 | -0.30725 | 7.99398  | 0.004693312 | 0.209834 | 0   | 3   | 1   | 7   | 11   | 6   |
| Tmem90b   | 3.037752 | 1.629205 | 9.292572 | 0.002300849 | 0.135109 | 0   | 2   | 0   | 0   | 8    | 5   |
| Grap      | 3.03353  | -0.09088 | 4.790096 | 0.028623827 | 0.561925 | 1   | 0   | 0   | 0   | 9    | 0   |
| Colq      | 3.031425 | 1.10494  | 8.727528 | 0.003134411 | 0.165982 | 0   | 3   | 0   | 4   | 4    | 8   |
| S100a8    | 3.030706 | 2.046719 | 12.04276 | 0.000519939 | 0.0514   | 23  | 6   | 17  | 16  | 84   | 108 |
| Tmem22    | 3.026875 | 2.200248 | 16.32486 | 5.33594E-05 | 0.009983 | 1   | 4   | 0   | 9   | 5    | 11  |
| A3galt2   | 2.990181 | 4.257566 | 7.901211 | 0.004940171 | 0.217368 | 0   | 0   | 1   | 0   | 4    | 3   |
| Ctla2a    | 2.986711 | 2.539001 | 12.64797 | 0.000375974 | 0.041823 | 3   | 0   | 0   | 1   | 10   | 6   |
| Sprrr1a   | 2.984576 | 4.685653 | 29.8383  | 4.69622E-08 | 5.32E-05 | 203 | 122 | 102 | 121 | 1488 | 673 |
| Serpine2  | 2.956943 | 6.312294 | 12.46669 | 0.000414273 | 0.044126 | 2   | 0   | 0   | 0   | 12   | 0   |
| Abcc9     | 2.955067 | 1.054783 | 8.524164 | 0.003504617 | 0.176394 | 1   | 0   | 3   | 9   | 0    | 8   |
| Spats1    | 2.948718 | 0.533044 | 7.079821 | 0.007795678 | 0.279088 | 3   | 1   | 0   | 0   | 10   | 10  |
| Abcg4     | 2.944195 | 4.048814 | 20.76148 | 5.20188E-06 | 0.00182  | 0   | 5   | 0   | 4   | 7    | 14  |
| 1110032AC | 2.941427 | 0.183104 | 7.657165 | 0.00565473  | 0.232403 | 4   | 0   | 0   | 7   | 5    | 6   |
| Penk      | 2.928307 | 1.055963 | 7.310481 | 0.006855359 | 0.258772 | 3   | 0   | 0   | 0   | 12   | 5   |
| Cd36      | 2.907979 | 1.123442 | 8.196415 | 0.004197323 | 0.196971 | 5   | 3   | 0   | 0   | 16   | 20  |
| St18      | 2.899518 | 0.84975  | 5.434308 | 0.019744916 | 0.468392 | 2   | 0   | 0   | 4   | 8    | 0   |
| Fut9      | 2.884179 | 1.445702 | 19.60133 | 9.54028E-06 | 0.002932 | 14  | 4   | 7   | 11  | 78   | 34  |
| Lyl1      | 2.870013 | -0.19419 | 4.100125 | 0.042880045 | 0.684586 | 5   | 0   | 0   | 2   | 13   | 8   |
| Myo1a     | 2.867678 | 5.569114 | 28.25851 | 1.06147E-07 | 9.52E-05 | 0   | 6   | 1   | 0   | 35   | 3   |
| 4930511M  | 2.856395 | -0.52426 | 4.245099 | 0.039363775 | 0.655125 | 2   | 0   | 0   | 0   | 5    | 5   |
| Selplg    | 2.851698 | 0.80997  | 8.108992 | 0.004404621 | 0.201764 | 0   | 3   | 0   | 6   | 10   | 1   |
| Tifab     | 2.818701 | 0.880844 | 6.224665 | 0.012598273 | 0.359026 | 4   | 0   | 0   | 0   | 16   | 5   |
| S100b     | 2.80236  | 10.6812  | 14.36232 | 0.00015079  | 0.022222 | 3   | 0   | 0   | 2   | 9    | 4   |
| Gm12250   | 2.799604 | 0.134653 | 4.902112 | 0.026823876 | 0.544785 | 1   | 0   | 5   | 2   | 17   | 10  |
| Ccr5      | 2.764192 | 1.137127 | 9.971243 | 0.001590041 | 0.105305 | 10  | 1   | 3   | 5   | 31   | 22  |
| B3galt5   | 2.76185  | 3.956344 | 69.19023 | 8.94099E-17 | 1.92E-12 | 75  | 41  | 32  | 89  | 352  | 195 |
| Ccdc13    | 2.70962  | 3.053109 | 10.78412 | 0.001023744 | 0.078949 | 0   | 0   | 3   | 4   | 11   | 0   |
| Dcc       | 2.704087 | 0.34656  | 4.425469 | 0.035406376 | 0.625721 | 4   | 0   | 0   | 0   | 10   | 7   |
| Serp2     | 2.696836 | 5.272013 | 12.75593 | 0.000354882 | 0.039977 | 0   | 0   | 3   | 0   | 9    | 5   |
| Serpind1  | 2.689633 | 3.077667 | 11.81074 | 0.0005889   | 0.055818 | 0   | 0   | 4   | 13  | 4    | 0   |
| Lpl       | 2.668868 | 1.967328 | 7.59369  | 0.005857295 | 0.238667 | 9   | 26  | 0   | 2   | 119  | 49  |
| Abcc3     | 2.666858 | 0.404253 | 6.18953  | 0.012850835 | 0.362383 | 6   | 1   | 0   | 3   | 5    | 15  |
| Wdfy4     | 2.620068 | 0.570892 | 6.571593 | 0.010361916 | 0.323446 | 4   | 0   | 0   | 3   | 8    | 5   |
| Aldh1b1   | 2.611228 | 1.430117 | 8.974025 | 0.002738447 | 0.152644 | 4   | 0   | 0   | 5   | 7    | 4   |
| Cnfn      | 2.609247 | 4.629092 | 59.45017 | 1.2543E-14  | 1.35E-10 | 264 | 122 | 138 | 302 | 981  | 655 |
| Avil      | 2.606653 | 7.959145 | 8.521967 | 0.00350885  | 0.176394 | 2   | 0   | 0   | 0   | 0    | 9   |
| 6720489N  | 2.592482 | 1.572674 | 10.91098 | 0.000955961 | 0.075755 | 6   | 1   | 0   | 13  | 12   | 2   |
| Acta1     | 2.583548 | 0.435204 | 3.964019 | 0.046482612 | 0.704916 | 1   | 0   | 0   | 2   | 2    | 1   |

|           |          |          |          |             |          |     |     |    |     |     |     |
|-----------|----------|----------|----------|-------------|----------|-----|-----|----|-----|-----|-----|
| Gpr123    | 2.547088 | 2.22593  | 6.042124 | 0.013968472 | 0.383349 | 0   | 1   | 1  | 8   | 0   | 0   |
| Sox2      | 2.538395 | 4.445089 | 7.857341 | 0.005061477 | 0.220451 | 0   | 0   | 2  | 0   | 9   | 0   |
| Lyz2      | 2.534881 | 2.182282 | 18.59316 | 1.618E-05   | 0.004298 | 30  | 15  | 3  | 20  | 106 | 53  |
| Mustn1    | 2.51183  | 1.492278 | 8.671686 | 0.00323192  | 0.168782 | 2   | 3   | 0  | 0   | 12  | 8   |
| Nfam1     | 2.505507 | 0.872797 | 5.239523 | 0.022079332 | 0.494358 | 8   | 0   | 7  | 0   | 21  | 27  |
| Scn2a1    | 2.483773 | 3.06872  | 8.643283 | 0.003282693 | 0.169785 | 0   | 1   | 2  | 4   | 0   | 7   |
| Lcn2      | 2.475035 | 1.788015 | 10.471   | 0.001212629 | 0.08697  | 26  | 19  | 21 | 16  | 63  | 119 |
| Zfp128    | 2.460565 | 0.260369 | 5.233909 | 0.022150694 | 0.494906 | 3   | 1   | 0  | 5   | 3   | 5   |
| Pou3f1    | 2.45625  | 6.283834 | 25.50593 | 4.41026E-07 | 0.000287 | 5   | 0   | 5  | 11  | 18  | 7   |
| Nsg1      | 2.45456  | 4.048026 | 13.558   | 0.000231304 | 0.029104 | 0   | 5   | 0  | 4   | 16  | 0   |
| Intu      | 2.452676 | 0.28285  | 5.261313 | 0.021804564 | 0.492158 | 7   | 6   | 0  | 13  | 15  | 14  |
| Frmf7     | 2.442264 | 0.940004 | 4.871847 | 0.027298273 | 0.548134 | 3   | 0   | 0  | 0   | 6   | 5   |
| Shisa4    | 2.42066  | 4.15143  | 20.12327 | 7.26077E-06 | 0.00248  | 0   | 10  | 1  | 7   | 12  | 18  |
| Fam181b   | 2.415974 | 3.331226 | 6.266449 | 0.012304546 | 0.354886 | 0   | 2   | 0  | 0   | 4   | 4   |
| Clcn5     | 2.40528  | 3.111664 | 9.667104 | 0.001875968 | 0.119762 | 5   | 0   | 0  | 4   | 0   | 11  |
| Emilin2   | 2.39475  | 0.700761 | 4.59951  | 0.031981101 | 0.593482 | 0   | 9   | 0  | 6   | 21  | 9   |
| Rgs16     | 2.391369 | 0.459063 | 4.402378 | 0.035888864 | 0.62938  | 3   | 0   | 0  | 4   | 6   | 1   |
| Dbnidd1   | 2.373083 | 3.660443 | 8.351306 | 0.003854102 | 0.187189 | 2   | 0   | 1  | 0   | 6   | 5   |
| Trpv2     | 2.361117 | 4.254681 | 8.570931 | 0.003415724 | 0.173743 | 0   | 0   | 3  | 3   | 6   | 2   |
| Ace       | 2.358007 | 0.793154 | 4.630693 | 0.031404873 | 0.586551 | 2   | 1   | 0  | 1   | 9   | 2   |
| Bend6     | 2.340067 | 7.334933 | 10.94064 | 0.000940777 | 0.075755 | 0   | 3   | 1  | 6   | 6   | 2   |
| Ncf1      | 2.337443 | 2.3516   | 21.55684 | 3.43496E-06 | 0.001369 | 21  | 13  | 3  | 18  | 71  | 33  |
| Sdk1      | 2.336527 | 3.037063 | 11.12089 | 0.00085361  | 0.072308 | 5   | 0   | 2  | 2   | 6   | 13  |
| Nova2     | 2.33268  | 2.975271 | 7.701866 | 0.005516377 | 0.23002  | 0   | 0   | 3  | 3   | 7   | 1   |
| Cd163     | 2.325037 | 1.800074 | 6.004572 | 0.014268856 | 0.388619 | 4   | 0   | 0  | 8   | 5   | 0   |
| Sqrdl     | 2.29122  | 1.492212 | 11.18053 | 0.000826601 | 0.070857 | 9   | 9   | 2  | 11  | 59  | 6   |
| 170002911 | 2.282518 | 0.256491 | 5.649999 | 0.017455384 | 0.439849 | 4   | 2   | 3  | 6   | 24  | 3   |
| Casp1     | 2.279062 | 1.56527  | 6.135017 | 0.013253026 | 0.371776 | 14  | 3   | 2  | 7   | 69  | 0   |
| Fa2h      | 2.27787  | 4.336233 | 5.566976 | 0.018302341 | 0.449928 | 0   | 2   | 0  | 1   | 0   | 6   |
| Apc2      | 2.250771 | 4.221415 | 14.40189 | 0.000147654 | 0.021936 | 0   | 1   | 6  | 3   | 16  | 4   |
| Cpne4     | 2.227445 | 4.724704 | 10.97634 | 0.000922825 | 0.075755 | 0   | 0   | 5  | 2   | 9   | 5   |
| Elmo1     | 2.215123 | 3.755488 | 16.44463 | 5.00917E-05 | 0.009729 | 4   | 2   | 4  | 5   | 14  | 11  |
| Cmpk2     | 2.18138  | 3.536197 | 16.64125 | 4.51583E-05 | 0.009056 | 13  | 5   | 0  | 5   | 19  | 24  |
| Lrrc48    | 2.164437 | 0.212031 | 4.023868 | 0.044860703 | 0.69893  | 3   | 1   | 0  | 1   | 4   | 6   |
| 4632428N  | 2.155179 | 2.09758  | 15.5525  | 8.02456E-05 | 0.013703 | 7   | 9   | 15 | 23  | 41  | 24  |
| Ptpr      | 2.152264 | 3.888012 | 6.577931 | 0.010325087 | 0.323011 | 0   | 3   | 0  | 0   | 10  | 0   |
| Nipa1     | 2.139494 | 2.089974 | 10.75695 | 0.001038885 | 0.079488 | 1   | 11  | 6  | 14  | 12  | 21  |
| Ldb3      | 2.125954 | 3.059443 | 13.02983 | 0.000306569 | 0.036243 | 12  | 3   | 0  | 8   | 11  | 18  |
| Rasd2     | 2.125617 | 2.722287 | 4.539761 | 0.033116216 | 0.605326 | 0   | 4   | 0  | 0   | 0   | 10  |
| Cfp       | 2.120442 | 1.517194 | 10.4932  | 0.001198147 | 0.086508 | 8   | 21  | 12 | 28  | 89  | 17  |
| Fxyd5     | 2.11669  | 3.66635  | 21.81921 | 2.99585E-06 | 0.001289 | 38  | 12  | 6  | 20  | 66  | 56  |
| Sytl2     | 2.108998 | 4.131267 | 10.57456 | 0.001146548 | 0.083909 | 3   | 3   | 0  | 5   | 13  | 0   |
| Rph3a     | 2.103857 | 7.872607 | 6.425151 | 0.011251532 | 0.33717  | 0   | 0   | 3  | 5   | 0   | 4   |
| Tm6sf1    | 2.088373 | 0.446061 | 7.570784 | 0.005932197 | 0.240371 | 5   | 7   | 2  | 15  | 18  | 6   |
| Celsr3    | 2.086823 | 3.733945 | 4.189912 | 0.040665209 | 0.666377 | 2   | 0   | 0  | 6   | 0   | 0   |
| Nalcn     | 2.074244 | 3.846983 | 25.52391 | 4.36935E-07 | 0.000287 | 4   | 13  | 9  | 14  | 43  | 17  |
| Pigz      | 2.066715 | 2.912178 | 12.48585 | 0.000410046 | 0.043893 | 5   | 0   | 6  | 2   | 23  | 7   |
| Shc2      | 2.0494   | 4.636591 | 4.272141 | 0.038742092 | 0.650214 | 0   | 2   | 0  | 0   | 0   | 6   |
| Coro2b    | 2.047226 | 6.100321 | 23.07888 | 1.55489E-06 | 0.000797 | 7   | 6   | 2  | 4   | 27  | 10  |
| Ermn      | 2.045312 | 4.350566 | 5.339109 | 0.020852133 | 0.482424 | 0   | 0   | 5  | 8   | 0   | 4   |
| Hcn3      | 2.042643 | 3.133334 | 7.402519 | 0.006513262 | 0.251146 | 0   | 0   | 5  | 0   | 16  | 0   |
| Lama4     | 2.034769 | 4.840982 | 18.95175 | 1.34067E-05 | 0.003727 | 14  | 0   | 0  | 6   | 26  | 6   |
| Stxbp6    | 2.034087 | 4.420945 | 8.44408  | 0.003662336 | 0.180514 | 9   | 0   | 0  | 0   | 29  | 0   |
| Gpr179    | 1.964396 | 1.406715 | 6.718201 | 0.009543382 | 0.30924  | 3   | 6   | 1  | 4   | 11  | 10  |
| Il22ra1   | 1.945119 | 0.773962 | 6.351565 | 0.011727781 | 0.344294 | 18  | 7   | 22 | 20  | 98  | 16  |
| Plekha4   | 1.944661 | 6.45366  | 11.50985 | 0.000692282 | 0.063384 | 1   | 0   | 7  | 11  | 5   | 4   |
| Pcdh17    | 1.940878 | 5.932583 | 18.00892 | 2.19872E-05 | 0.005379 | 1   | 13  | 0  | 12  | 15  | 8   |
| Crispld1  | 1.926805 | 2.620347 | 8.127399 | 0.004360126 | 0.201618 | 18  | 1   | 1  | 15  | 32  | 3   |
| Grip1     | 1.923959 | 4.430855 | 35.59714 | 2.42643E-09 | 4.45E-06 | 57  | 37  | 18 | 44  | 128 | 89  |
| Ppp1r3e   | 1.920289 | 0.782703 | 3.95392  | 0.046762321 | 0.705555 | 5   | 7   | 0  | 15  | 7   | 5   |
| Pcyt1b    | 1.889579 | 5.715672 | 33.61753 | 6.70854E-09 | 1.03E-05 | 34  | 17  | 16 | 13  | 110 | 44  |
| S100a9    | 1.877071 | 3.817263 | 8.824684 | 0.002971828 | 0.161878 | 187 | 146 | 73 | 101 | 402 | 379 |
| Cdsn      | 1.865646 | 3.314134 | 10.9085  | 0.000957242 | 0.075755 | 167 | 72  | 86 | 67  | 331 | 294 |
| AI428936  | 1.847384 | 3.206625 | 13.19101 | 0.000281295 | 0.034002 | 5   | 3   | 12 | 15  | 24  | 8   |
| Sgpp2     | 1.843926 | 5.571848 | 14.74422 | 0.000123124 | 0.019059 | 0   | 0   | 15 | 6   | 13  | 15  |

|           |          |          |          |             |          |      |      |      |      |      |      |
|-----------|----------|----------|----------|-------------|----------|------|------|------|------|------|------|
| Trim46    | 1.842892 | 3.554254 | 10.67175 | 0.001087841 | 0.082126 | 0    | 7    | 5    | 2    | 23   | 6    |
| D630045J1 | 1.841322 | 3.437815 | 18.41235 | 1.77901E-05 | 0.004612 | 10   | 15   | 9    | 16   | 28   | 30   |
| Iffo1     | 1.828256 | 4.094497 | 12.0745  | 0.000511161 | 0.050917 | 3    | 9    | 2    | 10   | 6    | 14   |
| Cp        | 1.823377 | 5.626036 | 26.40591 | 2.76692E-07 | 0.000205 | 72   | 42   | 37   | 53   | 91   | 147  |
| Nckap1l   | 1.822577 | 1.393901 | 3.869251 | 0.049178469 | 0.720347 | 2    | 19   | 10   | 2    | 14   | 45   |
| Prelid2   | 1.815088 | 2.896027 | 14.00954 | 0.000181886 | 0.025248 | 74   | 69   | 44   | 43   | 229  | 149  |
| Lilrb4    | 1.803765 | 0.661793 | 4.138228 | 0.041925031 | 0.676079 | 8    | 3    | 3    | 0    | 22   | 11   |
| Dfna5     | 1.803381 | 1.985125 | 5.932904 | 0.014860735 | 0.400681 | 7    | 0    | 0    | 5    | 9    | 2    |
| Ptpro     | 1.798469 | 1.780847 | 4.599227 | 0.031986372 | 0.593482 | 2    | 0    | 7    | 0    | 15   | 7    |
| Ms4a7     | 1.793197 | 1.205232 | 6.935646 | 0.008449452 | 0.28995  | 18   | 5    | 12   | 5    | 39   | 30   |
| Chrm1     | 1.791055 | 1.053707 | 7.479585 | 0.006240245 | 0.246811 | 11   | 5    | 9    | 18   | 25   | 11   |
| Snph      | 1.780391 | 5.192153 | 20.00605 | 7.71975E-06 | 0.002592 | 16   | 0    | 5    | 11   | 18   | 16   |
| Esrrg     | 1.77696  | 3.391285 | 8.107857 | 0.004407381 | 0.201764 | 0    | 9    | 0    | 5    | 15   | 2    |
| Gal3st3   | 1.775574 | 1.780636 | 5.64411  | 0.017514105 | 0.440226 | 0    | 1    | 7    | 5    | 11   | 3    |
| Dysf      | 1.773413 | 4.755647 | 6.059704 | 0.013830088 | 0.381498 | 3    | 2    | 0    | 0    | 12   | 0    |
| Al662270  | 1.773233 | 1.661805 | 5.103896 | 0.023872171 | 0.516307 | 15   | 14   | 3    | 4    | 15   | 39   |
| Slc39a14  | 1.771217 | 1.67146  | 6.199553 | 0.012778261 | 0.361759 | 1    | 6    | 7    | 15   | 5    | 8    |
| Tmem56    | 1.766957 | 4.440873 | 12.24644 | 0.000466148 | 0.04776  | 10   | 3    | 0    | 12   | 11   | 5    |
| Trappc2   | 1.756962 | 3.9469   | 19.70341 | 9.044E-06   | 0.00282  | 13   | 6    | 15   | 24   | 24   | 21   |
| Acvrl1    | 1.756528 | 2.845543 | 11.93673 | 0.00055038  | 0.053342 | 7    | 6    | 5    | 4    | 29   | 9    |
| Cfh       | 1.751298 | 2.976423 | 6.668243 | 0.009814589 | 0.313775 | 15   | 3    | 2    | 5    | 6    | 23   |
| Veph1     | 1.747748 | 0.941993 | 5.317901 | 0.021107416 | 0.485632 | 9    | 5    | 27   | 18   | 33   | 31   |
| Sv2c      | 1.741765 | 5.891348 | 5.602654 | 0.017933287 | 0.446595 | 0    | 8    | 0    | 4    | 11   | 4    |
| Mpped1    | 1.741176 | 1.673161 | 4.153772 | 0.041541875 | 0.674069 | 8    | 0    | 0    | 1    | 5    | 9    |
| Clec7a    | 1.739956 | 1.881327 | 5.724563 | 0.016729201 | 0.429604 | 1    | 3    | 16   | 5    | 40   | 7    |
| Klh129    | 1.738932 | 2.061302 | 8.417451 | 0.003716365 | 0.182144 | 5    | 4    | 5    | 6    | 23   | 4    |
| Coro1a    | 1.738108 | 4.500067 | 29.3752  | 5.96359E-08 | 6.11E-05 | 13   | 11   | 20   | 17   | 45   | 31   |
| Rasgrp3   | 1.72296  | 3.011795 | 12.81649 | 0.000343578 | 0.039321 | 6    | 9    | 11   | 14   | 46   | 3    |
| 1810041L1 | 1.720277 | 5.794856 | 4.719736 | 0.029818326 | 0.573757 | 4    | 0    | 0    | 2    | 5    | 2    |
| Stk32a    | 1.7183   | 2.038226 | 6.016534 | 0.014172452 | 0.386973 | 16   | 0    | 9    | 6    | 52   | 4    |
| Chd5      | 1.710741 | 5.107515 | 16.36514 | 5.22372E-05 | 0.009946 | 7    | 3    | 8    | 4    | 20   | 14   |
| Rnf182    | 1.710458 | 2.712347 | 15.88199 | 6.74172E-05 | 0.011988 | 16   | 14   | 14   | 28   | 63   | 9    |
| Gpr156    | 1.706957 | 1.683897 | 5.305661 | 0.021256227 | 0.48706  | 0    | 12   | 3    | 11   | 23   | 3    |
| Plcx3     | 1.702915 | 4.770777 | 7.295622 | 0.006912285 | 0.259331 | 0    | 7    | 0    | 0    | 16   | 0    |
| Gatm      | 1.693698 | 5.918767 | 4.481266 | 0.034268331 | 0.614431 | 4    | 0    | 0    | 0    | 8    | 1    |
| Fabp5     | 1.664596 | 7.541009 | 43.45662 | 4.33463E-11 | 1.6E-07  | 1716 | 1654 | 1337 | 1349 | 5536 | 2915 |
| 6230409E1 | 1.658792 | 5.674642 | 9.3735   | 0.002201448 | 0.131573 | 1    | 7    | 2    | 5    | 13   | 3    |
| 9330159F1 | 1.65587  | 5.489106 | 7.677997 | 0.005589818 | 0.231735 | 0    | 0    | 8    | 2    | 13   | 2    |
| Celf4     | 1.652037 | 6.466236 | 56.27304 | 6.30745E-14 | 4.52E-10 | 49   | 30   | 41   | 42   | 154  | 54   |
| Spp1      | 1.650366 | 3.891684 | 10.3084  | 0.001324262 | 0.093419 | 0    | 11   | 5    | 4    | 16   | 13   |
| Cd93      | 1.632256 | 3.141299 | 11.69259 | 0.000627494 | 0.059003 | 14   | 0    | 19   | 12   | 33   | 19   |
| Akr1b8    | 1.626032 | 2.385735 | 9.419533 | 0.002146862 | 0.129389 | 40   | 36   | 53   | 27   | 105  | 106  |
| Snhg11    | 1.622243 | 8.554883 | 8.276489 | 0.004016172 | 0.192444 | 2    | 3    | 20   | 21   | 4    | 17   |
| 2900097C1 | 1.621864 | 2.002593 | 9.034281 | 0.002649632 | 0.14885  | 13   | 9    | 9    | 21   | 32   | 9    |
| Robo2     | 1.610326 | 5.490906 | 16.88318 | 3.97524E-05 | 0.008304 | 22   | 8    | 4    | 3    | 41   | 23   |
| cip7      | 1.608446 | 0.936863 | 3.985664 | 0.045889    | 0.703111 | 0    | 10   | 12   | 8    | 18   | 17   |
| Gria3     | 1.602819 | 3.88974  | 15.24158 | 9.45974E-05 | 0.015657 | 15   | 8    | 7    | 16   | 23   | 17   |
| Gipc2     | 1.600912 | 1.814743 | 7.590416 | 0.005867939 | 0.238667 | 11   | 23   | 31   | 19   | 45   | 54   |
| 3110082D  | 1.600569 | 1.905799 | 7.750462 | 0.005369882 | 0.224783 | 5    | 8    | 6    | 6    | 28   | 7    |
| Fancf     | 1.600407 | 1.722036 | 6.489487 | 0.010851428 | 0.331647 | 7    | 16   | 7    | 9    | 33   | 19   |
| Oas3      | 1.598231 | 1.998645 | 3.954911 | 0.046734782 | 0.705555 | 69   | 45   | 35   | 11   | 116  | 133  |
| Clec12a   | 1.598098 | 0.642302 | 3.926842 | 0.047521106 | 0.71178  | 12   | 5    | 3    | 7    | 16   | 13   |
| Cldn1     | 1.571874 | 4.22912  | 32.47661 | 1.20636E-08 | 1.73E-05 | 97   | 81   | 61   | 79   | 215  | 147  |
| B3galnt1  | 1.563781 | 3.537587 | 6.932119 | 0.008466133 | 0.290059 | 7    | 8    | 14   | 4    | 9    | 33   |
| Irgm2     | 1.5622   | 1.837549 | 9.299226 | 0.002292507 | 0.135109 | 25   | 16   | 11   | 11   | 69   | 25   |
| Tthy2     | 1.562057 | 3.455289 | 14.25603 | 0.000159549 | 0.023195 | 16   | 9    | 5    | 7    | 29   | 20   |
| Hmha1     | 1.561934 | 1.917173 | 8.272546 | 0.004024903 | 0.192444 | 20   | 14   | 6    | 17   | 43   | 17   |
| Trpc2     | 1.561711 | 0.492295 | 3.950426 | 0.046859491 | 0.705555 | 3    | 8    | 12   | 8    | 21   | 15   |
| C3ar1     | 1.558869 | 3.078675 | 17.55321 | 2.79379E-05 | 0.006679 | 62   | 43   | 26   | 35   | 155  | 66   |
| Kif5c     | 1.557242 | 8.01035  | 10.84776 | 0.000989155 | 0.076833 | 12   | 0    | 2    | 6    | 19   | 2    |
| Kcnab3    | 1.551746 | 1.322217 | 4.636822 | 0.031292896 | 0.585856 | 13   | 6    | 3    | 3    | 32   | 10   |
| Beta-s    | 1.54937  | 7.985661 | 4.402775 | 0.035880504 | 0.62938  | 47   | 47   | 11   | 14   | 260  | 4    |
| Glipr2    | 1.547527 | 3.357239 | 7.115243 | 0.007643126 | 0.27546  | 6    | 2    | 3    | 8    | 11   | 2    |
| Asns      | 1.544598 | 5.470378 | 19.24544 | 1.14945E-05 | 0.003474 | 107  | 34   | 47   | 32   | 200  | 112  |
| Jph3      | 1.541853 | 5.516859 | 4.319949 | 0.037668041 | 0.643276 | 4    | 1    | 0    | 0    | 10   | 0    |

|           |          |          |          |             |          |      |      |      |      |       |      |
|-----------|----------|----------|----------|-------------|----------|------|------|------|------|-------|------|
| Lphn3     | 1.530869 | 2.42231  | 6.455275 | 0.01106234  | 0.333966 | 20   | 4    | 8    | 6    | 57    | 6    |
| Prkd1     | 1.516851 | 2.537231 | 5.959152 | 0.014641081 | 0.396469 | 9    | 0    | 8    | 2    | 23    | 8    |
| Dclk1     | 1.495958 | 5.975602 | 23.46077 | 1.27487E-06 | 0.000741 | 22   | 8    | 19   | 7    | 66    | 20   |
| Gcnt2     | 1.487562 | 7.310355 | 4.632584 | 0.031370277 | 0.586414 | 6    | 0    | 0    | 7    | 0     | 4    |
| Ablim3    | 1.483726 | 3.92719  | 5.940513 | 0.014796712 | 0.399456 | 0    | 5    | 4    | 1    | 17    | 0    |
| Clec2l    | 1.479348 | 5.551773 | 21.92941 | 2.82866E-06 | 0.001274 | 19   | 14   | 12   | 21   | 40    | 19   |
| Ms4a6c    | 1.476464 | 2.029484 | 5.367556 | 0.020514701 | 0.479255 | 25   | 18   | 11   | 25   | 20    | 36   |
| Acot7     | 1.467884 | 8.174982 | 43.58975 | 4.04955E-11 | 1.6E-07  | 91   | 74   | 77   | 79   | 172   | 152  |
| Tox3      | 1.46694  | 4.208456 | 8.384764 | 0.003783794 | 0.184232 | 9    | 6    | 0    | 7    | 15    | 5    |
| Plxnd1    | 1.464674 | 4.440187 | 13.75711 | 0.000208032 | 0.02763  | 11   | 4    | 24   | 18   | 49    | 7    |
| Serpina3n | 1.462788 | 6.237498 | 4.539493 | 0.033121404 | 0.605326 | 33   | 497  | 516  | 219  | 749   | 838  |
| Gpr37l1   | 1.460719 | 5.876833 | 5.047697 | 0.024658688 | 0.525071 | 7    | 0    | 0    | 0    | 13    | 0    |
| Rsph9     | 1.455643 | 2.749184 | 10.18025 | 0.001419532 | 0.09727  | 17   | 3    | 15   | 15   | 25    | 18   |
| Aldh18a1  | 1.449485 | 1.008102 | 4.733727 | 0.029576725 | 0.573309 | 13   | 4    | 5    | 15   | 19    | 4    |
| Fcer1g    | 1.447389 | 2.853699 | 16.69131 | 4.3982E-05  | 0.008928 | 32   | 38   | 35   | 42   | 88    | 52   |
| Hba-a2    | 1.441613 | 7.217656 | 4.130122 | 0.042126304 | 0.678435 | 54   | 26   | 12   | 3    | 197   | 12   |
| Ifi44     | 1.440674 | 3.232026 | 5.347481 | 0.020752229 | 0.482187 | 199  | 45   | 53   | 29   | 498   | 77   |
| Kifc2     | 1.418846 | 4.158735 | 14.30856 | 0.000155157 | 0.02271  | 11   | 6    | 30   | 24   | 49    | 11   |
| Ica1      | 1.417627 | 4.232624 | 7.843379 | 0.005100717 | 0.221455 | 7    | 10   | 23   | 5    | 23    | 35   |
| Rtp4      | 1.414422 | 3.728346 | 12.36624 | 0.000437168 | 0.045661 | 110  | 124  | 142  | 74   | 452   | 177  |
| 1700030J2 | 1.409921 | 2.376171 | 6.253198 | 0.012396931 | 0.356594 | 22   | 26   | 21   | 5    | 94    | 34   |
| Bnip3     | 1.404131 | 5.968689 | 25.51819 | 4.38231E-07 | 0.000287 | 103  | 78   | 104  | 53   | 309   | 143  |
| Sox5      | 1.402133 | 2.565192 | 6.970578 | 0.008286071 | 0.287118 | 10   | 13   | 7    | 8    | 47    | 5    |
| Atp6v1g2  | 1.387296 | 6.185388 | 10.01459 | 0.001553047 | 0.104098 | 7    | 11   | 0    | 3    | 21    | 7    |
| 6330407J2 | 1.380654 | 7.992673 | 5.048404 | 0.024648635 | 0.525071 | 0    | 8    | 0    | 0    | 14    | 0    |
| Rnf125    | 1.379058 | 4.818924 | 4.803179 | 0.028407279 | 0.559869 | 5    | 3    | 0    | 0    | 12    | 2    |
| Ppp4r4    | 1.338357 | 4.0046   | 10.92454 | 0.000948985 | 0.075755 | 18   | 7    | 3    | 9    | 28    | 9    |
| Spink5    | 1.332289 | 8.432949 | 15.4025  | 8.68733E-05 | 0.014718 | 8477 | 3286 | 3091 | 3444 | 15655 | 5585 |
| Ecm1      | 1.331355 | 6.451535 | 22.92308 | 1.68615E-06 | 0.000844 | 1485 | 896  | 1141 | 702  | 3302  | 1724 |
| Aspa      | 1.328933 | 4.451994 | 8.161232 | 0.00427953  | 0.199736 | 8    | 2    | 9    | 5    | 18    | 8    |
| E130309D: | 1.318313 | 4.107368 | 4.501164 | 0.033871782 | 0.609862 | 0    | 7    | 2    | 7    | 8     | 0    |
| Krt14     | 1.31294  | 8.382095 | 21.26881 | 3.99173E-06 | 0.001562 | 5661 | 4881 | 3281 | 3294 | 10834 | 7290 |
| Tmem25    | 1.311147 | 5.430104 | 6.634985 | 0.009999505 | 0.316862 | 14   | 1    | 1    | 9    | 17    | 0    |
| Fyb       | 1.308742 | 3.486409 | 9.530982 | 0.002020319 | 0.124911 | 50   | 39   | 22   | 29   | 57    | 71   |
| Ttc39c    | 1.308329 | 3.915659 | 6.217973 | 0.012645979 | 0.359306 | 3    | 14   | 4    | 2    | 14    | 17   |
| Fam43b    | 1.305819 | 4.364985 | 13.07361 | 0.000299486 | 0.035799 | 9    | 22   | 18   | 13   | 38    | 27   |
| Sncb      | 1.300131 | 7.117983 | 4.261948 | 0.0389752   | 0.653108 | 0    | 8    | 0    | 7    | 6     | 0    |
| Dpp6      | 1.290755 | 7.290268 | 4.230489 | 0.039704003 | 0.658422 | 0    | 0    | 8    | 2    | 10    | 1    |
| Klhdc9    | 1.290429 | 1.890893 | 6.036815 | 0.014010536 | 0.384014 | 6    | 21   | 21   | 23   | 38    | 17   |
| Osr2      | 1.286384 | 3.939775 | 15.66811 | 7.54861E-05 | 0.012993 | 304  | 145  | 141  | 234  | 519   | 174  |
| Epb4.9    | 1.283327 | 5.662534 | 13.7453  | 0.000209344 | 0.027633 | 4    | 22   | 11   | 16   | 35    | 9    |
| Angel1    | 1.282588 | 3.462179 | 11.56456 | 0.000672209 | 0.062074 | 15   | 16   | 17   | 34   | 29    | 10   |
| S100a4    | 1.275751 | 5.919353 | 17.27289 | 3.23774E-05 | 0.007411 | 336  | 240  | 229  | 138  | 624   | 446  |
| Rsad2     | 1.272896 | 2.633882 | 5.083478 | 0.024154873 | 0.51857  | 33   | 5    | 4    | 12   | 41    | 12   |
| Tfrc      | 1.251442 | 5.049938 | 18.71782 | 1.51559E-05 | 0.004076 | 213  | 69   | 110  | 99   | 330   | 157  |
| Cit       | 1.244489 | 2.563659 | 7.168995 | 0.007417432 | 0.270497 | 49   | 10   | 23   | 20   | 64    | 35   |
| Crct1     | 1.238291 | 4.470045 | 28.08671 | 1.16E-07    | 9.6E-05  | 407  | 233  | 330  | 308  | 790   | 364  |
| Gbp3      | 1.233431 | 2.577935 | 7.288283 | 0.006940578 | 0.259331 | 46   | 19   | 11   | 21   | 72    | 24   |
| St8sia4   | 1.229321 | 2.958223 | 10.73899 | 0.001049016 | 0.079755 | 86   | 31   | 28   | 38   | 125   | 53   |
| Rnf157    | 1.220213 | 6.404902 | 8.321772 | 0.00391727  | 0.189402 | 9    | 6    | 7    | 8    | 24    | 2    |
| Sp110     | 1.213221 | 1.132412 | 4.396748 | 0.036007537 | 0.629868 | 20   | 20   | 21   | 30   | 40    | 19   |
| Pld4      | 1.209638 | 2.233884 | 4.698433 | 0.030190124 | 0.576787 | 6    | 18   | 20   | 8    | 39    | 22   |
| Ccl6      | 1.208688 | 2.169594 | 4.507771 | 0.033741191 | 0.608529 | 14   | 11   | 13   | 11   | 44    | 8    |
| Lcp1      | 1.191605 | 5.703614 | 7.599571 | 0.00583822  | 0.238359 | 71   | 22   | 38   | 10   | 81    | 82   |
| Gm1568    | 1.187515 | 2.404498 | 4.777659 | 0.028831291 | 0.563705 | 3    | 10   | 10   | 10   | 21    | 5    |
| Car13     | 1.187473 | 2.345678 | 7.337264 | 0.006753956 | 0.256746 | 43   | 55   | 36   | 72   | 110   | 24   |
| Slc30a4   | 1.184213 | 4.320893 | 7.059598 | 0.007884168 | 0.279927 | 229  | 111  | 181  | 94   | 737   | 90   |
| Mrc1      | 1.183917 | 3.872311 | 15.14477 | 9.9574E-05  | 0.016354 | 71   | 44   | 26   | 71   | 73    | 46   |
| Pglyrp4   | 1.165672 | 3.328966 | 5.108504 | 0.023808841 | 0.516307 | 284  | 65   | 124  | 78   | 458   | 162  |
| Laptm5    | 1.161359 | 3.622262 | 9.276538 | 0.002321077 | 0.135357 | 50   | 63   | 34   | 30   | 97    | 78   |
| Mmd       | 1.161359 | 2.957801 | 5.854945 | 0.015533342 | 0.412612 | 16   | 15   | 56   | 29   | 42    | 44   |
| Smo       | 1.158544 | 2.068637 | 7.247011 | 0.007101914 | 0.263457 | 29   | 29   | 27   | 42   | 59    | 21   |
| Cntn1     | 1.156595 | 8.946245 | 30.42967 | 3.46192E-08 | 4.14E-05 | 66   | 35   | 64   | 42   | 158   | 46   |
| Eno3      | 1.153122 | 1.997577 | 4.463737 | 0.034621671 | 0.618296 | 27   | 12   | 35   | 30   | 42    | 27   |
| Cidea     | 1.128417 | 4.253781 | 9.970561 | 0.00159063  | 0.105305 | 33   | 4    | 22   | 21   | 46    | 15   |

|           |          |          |          |             |          |      |      |      |      |      |      |
|-----------|----------|----------|----------|-------------|----------|------|------|------|------|------|------|
| Sulf2     | 1.124048 | 4.955007 | 16.04913 | 6.17201E-05 | 0.011254 | 34   | 14   | 28   | 23   | 68   | 18   |
| Orai2     | 1.120475 | 3.223448 | 6.503528 | 0.010766065 | 0.330446 | 27   | 11   | 38   | 30   | 77   | 9    |
| Ar        | 1.119673 | 4.624346 | 6.15612  | 0.013095813 | 0.367845 | 21   | 5    | 0    | 7    | 25   | 5    |
| 2310014H  | 1.114058 | 4.544173 | 13.3445  | 0.000259182 | 0.031866 | 156  | 83   | 83   | 55   | 223  | 151  |
| Adora1    | 1.111321 | 5.840457 | 10.54828 | 0.001162962 | 0.084535 | 25   | 3    | 17   | 24   | 21   | 14   |
| Tmem8     | 1.099962 | 4.609333 | 4.176484 | 0.040988663 | 0.668622 | 6    | 5    | 2    | 4    | 9    | 5    |
| Mfap5     | 1.086474 | 5.794197 | 12.26466 | 0.000461618 | 0.047751 | 37   | 23   | 4    | 20   | 48   | 19   |
| Atp1b2    | 1.07947  | 4.95322  | 7.809586 | 0.005196982 | 0.222943 | 8    | 4    | 22   | 18   | 26   | 3    |
| Mrs2      | 1.079091 | 2.602387 | 6.940297 | 0.008427514 | 0.289659 | 40   | 19   | 42   | 29   | 58   | 42   |
| Nacad     | 1.074696 | 6.966956 | 6.699552 | 0.009643713 | 0.310478 | 2    | 5    | 17   | 5    | 12   | 15   |
| Il1a      | 1.071918 | 2.693285 | 4.336561 | 0.037302192 | 0.640027 | 191  | 64   | 58   | 67   | 263  | 96   |
| Fam105a   | 1.068192 | 1.869203 | 4.312727 | 0.037828287 | 0.643489 | 24   | 14   | 6    | 9    | 40   | 13   |
| C3        | 1.060369 | 2.709076 | 9.137046 | 0.002504852 | 0.142202 | 89   | 70   | 98   | 59   | 221  | 83   |
| Cybb      | 1.059129 | 3.507033 | 12.64286 | 0.000377003 | 0.041823 | 67   | 58   | 52   | 38   | 136  | 67   |
| Tmem181t  | 1.054185 | 2.801514 | 4.935338 | 0.026312909 | 0.540734 | 80   | 23   | 48   | 59   | 130  | 21   |
| Ceacam1   | 1.050121 | 7.023366 | 16.6288  | 4.54556E-05 | 0.009056 | 3152 | 1435 | 1551 | 1170 | 4654 | 2264 |
| Fkbp1b    | 1.046432 | 6.984057 | 10.89453 | 0.000964486 | 0.075755 | 12   | 16   | 14   | 13   | 31   | 12   |
| Mpeg1     | 1.045099 | 1.748727 | 4.065828 | 0.043759218 | 0.689761 | 25   | 21   | 10   | 13   | 48   | 17   |
| Col23a1   | 1.043078 | 5.295223 | 25.19831 | 5.17276E-07 | 0.000318 | 262  | 163  | 173  | 137  | 437  | 216  |
| Etv1      | 1.03965  | 4.469363 | 10.90753 | 0.000957741 | 0.075755 | 39   | 20   | 15   | 32   | 48   | 16   |
| Mdga1     | 1.036447 | 3.608609 | 4.286617 | 0.038413528 | 0.646227 | 1    | 17   | 5    | 5    | 18   | 9    |
| Ust       | 1.028111 | 4.559284 | 12.93287 | 0.000322862 | 0.037348 | 26   | 26   | 27   | 31   | 60   | 15   |
| Nap1l5    | 1.024308 | 7.157431 | 4.864104 | 0.02742104  | 0.548829 | 9    | 8    | 1    | 9    | 4    | 10   |
| B230206H  | 1.020998 | 5.020254 | 14.14416 | 0.000169322 | 0.024127 | 46   | 38   | 54   | 26   | 102  | 54   |
| Csrnp2    | 1.020326 | 2.572434 | 3.843001 | 0.049954038 | 0.725996 | 54   | 11   | 10   | 14   | 65   | 20   |
| 20100161t | 1.017205 | 1.707025 | 4.174299 | 0.041041539 | 0.668977 | 48   | 52   | 53   | 65   | 80   | 46   |
| Cdr2l     | 1.017102 | 5.28676  | 8.723368 | 0.003141572 | 0.165982 | 25   | 15   | 36   | 8    | 81   | 20   |
| Chst1     | 1.014639 | 4.234149 | 5.100103 | 0.023924428 | 0.516307 | 4    | 20   | 7    | 8    | 23   | 11   |
| Cyp4f39   | 1.010898 | 2.093859 | 3.967285 | 0.046392518 | 0.704916 | 33   | 23   | 12   | 25   | 40   | 20   |
| Kcnip2    | 1.009619 | 5.814021 | 8.32953  | 0.003900575 | 0.18902  | 9    | 15   | 18   | 12   | 38   | 7    |
| Lce3a     | 0.999861 | 8.123519 | 43.39817 | 4.46606E-11 | 1.6E-07  | 5872 | 3680 | 4062 | 3929 | 8418 | 4561 |
| Adcy7     | 0.999069 | 2.633515 | 6.437136 | 0.011175869 | 0.33537  | 61   | 58   | 77   | 63   | 114  | 68   |
| Nfasc     | 0.996458 | 7.691302 | 8.923661 | 0.002814996 | 0.154904 | 20   | 5    | 19   | 5    | 21   | 28   |
| Mef2c     | 0.993958 | 6.128493 | 17.65589 | 2.64694E-05 | 0.006399 | 33   | 39   | 60   | 49   | 69   | 46   |
| Rassf4    | 0.99321  | 6.000451 | 23.28121 | 1.39961E-06 | 0.000755 | 107  | 75   | 78   | 111  | 115  | 83   |
| Fam82a1   | 0.990169 | 2.22795  | 3.971815 | 0.046267875 | 0.704529 | 23   | 14   | 11   | 19   | 27   | 13   |
| Cx3cr1    | 0.986871 | 5.041235 | 12.41707 | 0.000425426 | 0.045091 | 216  | 164  | 126  | 111  | 253  | 229  |
| Wisp1     | 0.985652 | 3.239455 | 4.379971 | 0.036363621 | 0.631987 | 63   | 90   | 67   | 21   | 197  | 88   |
| Ccdc84    | 0.981271 | 2.046338 | 3.886962 | 0.048662387 | 0.719107 | 39   | 19   | 47   | 24   | 97   | 24   |
| Csf1r     | 0.981132 | 5.199999 | 11.35372 | 0.000752969 | 0.067786 | 155  | 132  | 181  | 89   | 285  | 202  |
| Rnf24     | 0.980306 | 3.758715 | 7.070479 | 0.007836428 | 0.279616 | 32   | 13   | 21   | 20   | 32   | 26   |
| Mcc       | 0.978506 | 2.809821 | 5.591448 | 0.018048366 | 0.447036 | 136  | 49   | 57   | 81   | 149  | 63   |
| Ttc39a    | 0.974356 | 2.757242 | 4.124145 | 0.042275372 | 0.679353 | 11   | 16   | 12   | 8    | 24   | 17   |
| Ubash3b   | 0.970846 | 7.420903 | 8.025204 | 0.004613083 | 0.208958 | 39   | 18   | 12   | 14   | 40   | 29   |
| Lix1      | 0.969555 | 6.264506 | 4.075139 | 0.043518677 | 0.68748  | 10   | 2    | 5    | 4    | 6    | 11   |
| Pla2r1    | 0.968684 | 2.865331 | 7.922279 | 0.004882974 | 0.215291 | 76   | 78   | 49   | 54   | 107  | 82   |
| Sh2d3c    | 0.962537 | 3.473922 | 4.141809 | 0.041836431 | 0.676079 | 20   | 2    | 5    | 10   | 14   | 8    |
| Drp2      | 0.961575 | 7.565775 | 4.857497 | 0.027526242 | 0.549401 | 3    | 0    | 18   | 0    | 22   | 5    |
| Krt19     | 0.957664 | 4.845478 | 9.292878 | 0.002300464 | 0.135109 | 556  | 427  | 407  | 254  | 831  | 583  |
| Adamts5   | 0.953351 | 5.854356 | 15.09221 | 0.000102385 | 0.016621 | 36   | 28   | 48   | 44   | 54   | 36   |
| C1qc      | 0.944101 | 3.768129 | 7.083517 | 0.007779618 | 0.279088 | 94   | 64   | 38   | 47   | 127  | 65   |
| Dyrk1b    | 0.942764 | 3.103831 | 7.440625 | 0.006376774 | 0.250156 | 69   | 48   | 43   | 28   | 113  | 58   |
| Trip13    | 0.941673 | 2.680215 | 7.201068 | 0.007286019 | 0.266609 | 144  | 60   | 94   | 96   | 185  | 77   |
| AK010878  | 0.941575 | 2.090964 | 4.211969 | 0.040139724 | 0.662225 | 23   | 27   | 42   | 29   | 67   | 23   |
| Ifit1     | 0.938444 | 4.124354 | 9.63308  | 0.001911039 | 0.120201 | 228  | 168  | 147  | 123  | 416  | 157  |
| Gabbr2    | 0.936463 | 4.324564 | 7.765923 | 0.005324109 | 0.224412 | 24   | 12   | 23   | 15   | 51   | 10   |
| Tmem121   | 0.931006 | 4.796996 | 6.355773 | 0.011699997 | 0.344294 | 20   | 11   | 22   | 9    | 54   | 8    |
| Pacrgl    | 0.928252 | 1.904835 | 3.897951 | 0.048345033 | 0.718364 | 26   | 14   | 26   | 25   | 25   | 23   |
| Daam2     | 0.927624 | 3.893067 | 4.718025 | 0.029848008 | 0.573757 | 29   | 11   | 7    | 25   | 19   | 9    |
| Slnf2     | 0.925944 | 3.671827 | 5.247245 | 0.021981548 | 0.494008 | 271  | 152  | 168  | 144  | 410  | 172  |
| Klk10     | 0.919076 | 3.363513 | 5.634215 | 0.017613231 | 0.441171 | 253  | 107  | 164  | 98   | 386  | 161  |
| Klhdc8b   | 0.916826 | 4.035495 | 10.47848 | 0.001207734 | 0.086908 | 51   | 56   | 72   | 66   | 90   | 54   |
| Kprp      | 0.916734 | 2.503476 | 5.127321 | 0.023552055 | 0.514986 | 100  | 69   | 114  | 79   | 192  | 78   |
| Pfkip     | 0.915234 | 6.936491 | 21.91953 | 2.84326E-06 | 0.001274 | 141  | 145  | 106  | 84   | 291  | 119  |
| Cnp       | 0.912163 | 7.691365 | 18.00797 | 2.19981E-05 | 0.005379 | 131  | 74   | 89   | 72   | 135  | 121  |

|           |          |          |          |             |          |      |      |      |      |       |      |
|-----------|----------|----------|----------|-------------|----------|------|------|------|------|-------|------|
| Gdap1     | 0.893312 | 6.752985 | 3.978144 | 0.046094337 | 0.703111 | 13   | 8    | 0    | 2    | 14    | 9    |
| Kcna1     | 0.890176 | 9.5042   | 6.241299 | 0.012480493 | 0.358473 | 18   | 9    | 14   | 4    | 14    | 28   |
| Fam178b   | 0.886657 | 6.740089 | 7.210287 | 0.007248691 | 0.266447 | 20   | 13   | 9    | 12   | 29    | 9    |
| Sec24d    | 0.884938 | 2.861037 | 5.991125 | 0.014378034 | 0.390603 | 102  | 33   | 60   | 42   | 119   | 62   |
| Cdc42ep2  | 0.882869 | 4.831933 | 10.21568 | 0.001392513 | 0.096339 | 63   | 37   | 19   | 29   | 77    | 34   |
| Cd200     | 0.878569 | 4.343482 | 4.010878 | 0.045207604 | 0.700601 | 14   | 5    | 12   | 14   | 17    | 5    |
| Camk4     | 0.8776   | 3.928188 | 10.89409 | 0.000964717 | 0.075755 | 85   | 61   | 51   | 46   | 114   | 67   |
| Scara3    | 0.87667  | 3.570976 | 6.900143 | 0.008618888 | 0.293727 | 47   | 29   | 47   | 35   | 59    | 43   |
| Nmb       | 0.875652 | 6.641125 | 5.821826 | 0.015828504 | 0.415865 | 17   | 7    | 10   | 7    | 23    | 10   |
| Scg5      | 0.875064 | 5.489247 | 4.536626 | 0.033176932 | 0.605326 | 10   | 6    | 11   | 10   | 18    | 4    |
| Gpr64     | 0.874934 | 4.688271 | 7.407296 | 0.00649599  | 0.250929 | 28   | 13   | 24   | 9    | 52    | 18   |
| Isg15     | 0.874573 | 5.174099 | 12.93688 | 0.000322172 | 0.037348 | 712  | 418  | 538  | 336  | 1274  | 450  |
| Adamts1   | 0.870229 | 5.334972 | 9.991899 | 0.001572304 | 0.105061 | 450  | 669  | 430  | 645  | 649   | 431  |
| Accn2     | 0.868134 | 5.143399 | 7.472033 | 0.006266475 | 0.247394 | 19   | 11   | 25   | 19   | 32    | 13   |
| Aatk      | 0.867533 | 8.915216 | 16.0801  | 6.07188E-05 | 0.011166 | 72   | 58   | 63   | 50   | 98    | 70   |
| Eepd1     | 0.866839 | 5.842042 | 8.648471 | 0.003273359 | 0.169785 | 21   | 28   | 18   | 12   | 62    | 10   |
| Pdzd4     | 0.866418 | 4.354298 | 5.372774 | 0.020453421 | 0.479255 | 30   | 25   | 13   | 34   | 45    | 3    |
| Gng5      | 0.865576 | 3.24461  | 5.665791 | 0.017298916 | 0.438869 | 186  | 70   | 156  | 132  | 253   | 91   |
| Ifitm1    | 0.862798 | 8.806115 | 21.01567 | 4.55543E-06 | 0.001697 | 9476 | 6565 | 6930 | 4570 | 16526 | 6712 |
| Ifitm3    | 0.862063 | 7.152773 | 19.07505 | 1.25677E-05 | 0.003605 | 2038 | 1568 | 1190 | 983  | 3034  | 1574 |
| Ankrd43   | 0.848271 | 2.827886 | 4.419029 | 0.035540258 | 0.626277 | 57   | 49   | 20   | 47   | 43    | 41   |
| Fam19a5   | 0.840598 | 4.273132 | 7.482724 | 0.006229378 | 0.246811 | 40   | 15   | 17   | 19   | 42    | 20   |
| Odz4      | 0.838093 | 4.785427 | 9.107838 | 0.002545166 | 0.143732 | 224  | 234  | 178  | 165  | 293   | 231  |
| D17H6S56i | 0.825694 | 4.678549 | 10.19531 | 0.001407982 | 0.097097 | 75   | 35   | 74   | 47   | 107   | 52   |
| Zfp422    | 0.820316 | 3.166358 | 4.848832 | 0.027664864 | 0.551656 | 101  | 32   | 92   | 60   | 157   | 45   |
| Lce3f     | 0.809824 | 2.140616 | 3.845787 | 0.049871109 | 0.725696 | 92   | 76   | 62   | 76   | 122   | 56   |
| Rnase4    | 0.80861  | 4.397148 | 7.143307 | 0.007524428 | 0.273011 | 227  | 173  | 171  | 113  | 439   | 138  |
| Plxnc1    | 0.807274 | 5.333388 | 6.237652 | 0.012506216 | 0.358473 | 51   | 22   | 13   | 16   | 39    | 35   |
| Gdpd2     | 0.805439 | 4.637227 | 10.92237 | 0.000950102 | 0.075755 | 441  | 334  | 379  | 345  | 717   | 258  |
| Wnt9a     | 0.802692 | 4.850909 | 5.921726 | 0.014955305 | 0.402223 | 546  | 301  | 523  | 322  | 702   | 437  |
| Gpr172b   | 0.800695 | 2.62636  | 4.066065 | 0.043753088 | 0.689761 | 37   | 21   | 37   | 20   | 62    | 26   |
| Bcl2l15   | 0.793556 | 5.098155 | 7.320885 | 0.006815783 | 0.25773  | 789  | 374  | 683  | 296  | 1335  | 510  |
| Noxo1     | 0.789184 | 2.708461 | 4.138708 | 0.041913156 | 0.676079 | 94   | 72   | 49   | 46   | 114   | 71   |
| Ier5l     | 0.784008 | 2.956932 | 4.040863 | 0.044411113 | 0.693936 | 72   | 30   | 79   | 68   | 84    | 38   |
| Iitgb1    | 0.780345 | 3.465857 | 4.527153 | 0.033361083 | 0.606248 | 189  | 156  | 174  | 124  | 286   | 155  |
| Twf2      | 0.777362 | 3.77648  | 4.73687  | 0.029522743 | 0.572778 | 19   | 37   | 40   | 17   | 57    | 34   |
| Apba1     | 0.771741 | 7.272902 | 6.028    | 0.014080676 | 0.385445 | 28   | 13   | 12   | 12   | 44    | 4    |
| Parp14    | 0.770146 | 5.361473 | 11.24354 | 0.000799006 | 0.069123 | 663  | 507  | 489  | 307  | 928   | 550  |
| Irf9      | 0.769809 | 5.357071 | 13.98992 | 0.000183793 | 0.025284 | 562  | 490  | 381  | 290  | 877   | 424  |
| Fyn       | 0.76893  | 6.334412 | 6.360166 | 0.011671064 | 0.344294 | 23   | 27   | 11   | 20   | 21    | 23   |
| Sall2     | 0.766531 | 3.899992 | 5.01224  | 0.025168721 | 0.527777 | 23   | 28   | 15   | 17   | 39    | 17   |
| C1qa      | 0.765368 | 4.56947  | 5.817218 | 0.015870029 | 0.416022 | 171  | 133  | 80   | 76   | 177   | 140  |
| Mbd4      | 0.761914 | 3.74831  | 8.654548 | 0.00326246  | 0.169785 | 136  | 91   | 81   | 108  | 173   | 54   |
| Sardh     | 0.759253 | 2.982124 | 4.399456 | 0.035950388 | 0.62938  | 38   | 20   | 31   | 24   | 58    | 17   |
| Fam171b   | 0.757738 | 6.621309 | 6.621587 | 0.010075003 | 0.318317 | 64   | 36   | 32   | 34   | 115   | 9    |
| Ilf19     | 0.757578 | 4.450833 | 5.283558 | 0.021527711 | 0.489635 | 615  | 337  | 253  | 210  | 749   | 348  |
| Stk11ip   | 0.755805 | 3.293001 | 5.316351 | 0.021126201 | 0.485632 | 89   | 55   | 86   | 58   | 153   | 48   |
| Anxa3     | 0.75456  | 4.035785 | 7.287791 | 0.006942481 | 0.259331 | 211  | 159  | 216  | 112  | 336   | 184  |
| B4galnt1  | 0.751776 | 5.016262 | 11.637   | 0.000646527 | 0.060219 | 198  | 81   | 116  | 85   | 245   | 97   |
| Qsox1     | 0.750486 | 6.760765 | 13.2153  | 0.000277674 | 0.033946 | 1460 | 1000 | 833  | 573  | 1950  | 1020 |
| Ppm1j     | 0.747011 | 5.217098 | 6.116307 | 0.013394037 | 0.374268 | 22   | 15   | 32   | 29   | 36    | 9    |
| Lrrc4     | 0.739406 | 4.548596 | 9.238136 | 0.002370261 | 0.136725 | 400  | 165  | 320  | 241  | 505   | 193  |
| Slc16a6   | 0.739109 | 4.577735 | 8.194404 | 0.004201981 | 0.196971 | 115  | 119  | 89   | 75   | 198   | 83   |
| Acpp      | 0.736324 | 6.744303 | 27.13128 | 1.90097E-07 | 0.000151 | 1090 | 790  | 689  | 664  | 1429  | 640  |
| Tmem229t  | 0.735385 | 6.653288 | 12.16565 | 0.000486776 | 0.048941 | 63   | 47   | 43   | 33   | 84    | 45   |
| Trmt2b    | 0.735078 | 4.166074 | 8.07029  | 0.004499692 | 0.205553 | 118  | 127  | 163  | 116  | 169   | 128  |
| Bnc2      | 0.730588 | 3.890631 | 4.551911 | 0.032882025 | 0.603145 | 22   | 39   | 15   | 22   | 38    | 21   |
| Dnajb9    | 0.728872 | 3.107109 | 4.209925 | 0.040188104 | 0.662225 | 57   | 55   | 49   | 41   | 112   | 30   |
| Elovl4    | 0.728064 | 5.456318 | 4.717001 | 0.029865787 | 0.573757 | 37   | 8    | 14   | 6    | 37    | 19   |
| Itipr1l2  | 0.725027 | 5.295232 | 11.96457 | 0.000542217 | 0.053029 | 495  | 254  | 323  | 262  | 519   | 300  |
| Serpini1  | 0.724261 | 4.900461 | 6.905545 | 0.008592881 | 0.293467 | 70   | 67   | 35   | 35   | 121   | 37   |
| Clspn     | 0.715635 | 2.995924 | 4.377021 | 0.036426603 | 0.63257  | 220  | 100  | 122  | 135  | 176   | 114  |
| Prmt10    | 0.715287 | 3.700576 | 4.977772 | 0.025675035 | 0.531688 | 111  | 83   | 98   | 65   | 196   | 63   |
| Tfb2m     | 0.714334 | 3.053401 | 5.034861 | 0.024842082 | 0.526975 | 97   | 59   | 62   | 50   | 120   | 57   |
| Gm8580    | 0.709338 | 3.114513 | 3.875057 | 0.049008648 | 0.720347 | 136  | 122  | 154  | 91   | 208   | 125  |

|           |          |          |          |             |          |        |       |       |       |        |       |
|-----------|----------|----------|----------|-------------|----------|--------|-------|-------|-------|--------|-------|
| Rnf41     | 0.706557 | 3.944335 | 4.402911 | 0.035877646 | 0.62938  | 73     | 33    | 39    | 36    | 70     | 39    |
| Lgals9    | 0.705976 | 4.557953 | 8.528369 | 0.003496528 | 0.176394 | 100    | 104   | 91    | 63    | 146    | 94    |
| Pop4      | 0.705793 | 4.497314 | 6.099437 | 0.013522492 | 0.376391 | 328    | 202   | 148   | 158   | 482    | 118   |
| Marveld3  | 0.700923 | 3.657252 | 4.319819 | 0.037670929 | 0.643276 | 349    | 145   | 187   | 155   | 400    | 153   |
| Col11a1   | 0.700625 | 4.550383 | 7.803864 | 0.005213462 | 0.222943 | 290    | 217   | 217   | 160   | 292    | 246   |
| Krt7      | 0.700081 | 4.172568 | 8.040059 | 0.004575406 | 0.208128 | 313    | 368   | 293   | 261   | 491    | 259   |
| Slc6a14   | 0.698498 | 6.22128  | 9.890956 | 0.00166093  | 0.107965 | 1916   | 852   | 1450  | 837   | 2573   | 1031  |
| Kptn      | 0.698082 | 2.788439 | 5.453997 | 0.019523609 | 0.466714 | 66     | 53    | 60    | 50    | 95     | 41    |
| Myo5a     | 0.697933 | 7.526563 | 15.9186  | 6.61255E-05 | 0.011856 | 161    | 77    | 100   | 75    | 191    | 83    |
| Fam65a    | 0.696305 | 5.199431 | 6.468728 | 0.010978906 | 0.333966 | 54     | 115   | 83    | 66    | 118    | 77    |
| Eif4e3    | 0.691676 | 5.123406 | 6.371111 | 0.011599296 | 0.343761 | 41     | 52    | 23    | 27    | 74     | 24    |
| I830012O1 | 0.689489 | 4.240874 | 6.884793 | 0.008693214 | 0.294093 | 365    | 269   | 262   | 158   | 575    | 231   |
| Nfkbiz    | 0.68849  | 5.891434 | 13.0065  | 0.000310412 | 0.036496 | 1434   | 800   | 1007  | 898   | 1488   | 800   |
| Rpusd4    | 0.683201 | 3.043725 | 3.887071 | 0.048659216 | 0.719107 | 66     | 66    | 70    | 74    | 93     | 38    |
| Pld2      | 0.675321 | 3.044488 | 4.978743 | 0.025660625 | 0.531688 | 117    | 112   | 104   | 67    | 233    | 69    |
| Cd24a     | 0.671878 | 7.608128 | 13.17897 | 0.000283108 | 0.03403  | 1978   | 1191  | 1750  | 991   | 2528   | 1392  |
| Lama2     | 0.671509 | 4.036423 | 3.972142 | 0.046258896 | 0.704529 | 77     | 109   | 54    | 58    | 82     | 87    |
| 4933431E2 | 0.664472 | 4.521984 | 4.381604 | 0.036328797 | 0.631987 | 35     | 23    | 45    | 13    | 66     | 29    |
| Arhgdib   | 0.662678 | 5.046773 | 14.09736 | 0.000173588 | 0.024411 | 730    | 423   | 500   | 362   | 893    | 410   |
| Wipf3     | 0.661314 | 6.986785 | 4.998589 | 0.025367996 | 0.529406 | 10     | 25    | 30    | 24    | 25     | 16    |
| Tspyl4    | 0.661268 | 5.613259 | 5.598192 | 0.01797902  | 0.446694 | 34     | 17    | 29    | 28    | 30     | 20    |
| Slc16a13  | 0.660032 | 3.187751 | 3.884645 | 0.048729559 | 0.719256 | 199    | 123   | 144   | 92    | 335    | 85    |
| Gramd1a   | 0.659656 | 4.427139 | 4.286579 | 0.038414396 | 0.646227 | 42     | 20    | 35    | 33    | 54     | 12    |
| A930005H: | 0.655956 | 3.421953 | 4.962492 | 0.025902856 | 0.534862 | 73     | 75    | 69    | 41    | 117    | 63    |
| Zfp651    | 0.649275 | 5.305559 | 8.764867 | 0.003070885 | 0.164571 | 101    | 149   | 121   | 113   | 172    | 87    |
| Als2cr4   | 0.647658 | 4.782092 | 7.122449 | 0.007612465 | 0.274815 | 105    | 96    | 124   | 52    | 182    | 97    |
| Matn2     | 0.647648 | 4.925273 | 6.273091 | 0.012258511 | 0.354032 | 47     | 33    | 29    | 34    | 56     | 19    |
| Rarres1   | 0.638227 | 4.528679 | 6.177507 | 0.012938441 | 0.364376 | 92     | 69    | 85    | 75    | 108    | 55    |
| Arhgef10l | 0.637466 | 4.45641  | 6.674022 | 0.009782819 | 0.313225 | 125    | 80    | 82    | 52    | 146    | 83    |
| Gas2l3    | 0.634318 | 5.858749 | 6.25536  | 0.012381809 | 0.356594 | 233    | 107   | 147   | 95    | 333    | 86    |
| Dnm1      | 0.634087 | 6.681009 | 10.07076 | 0.001506412 | 0.101287 | 99     | 60    | 61    | 38    | 102    | 72    |
| Adamtsl4  | 0.63082  | 5.07523  | 8.244898 | 0.004086671 | 0.194679 | 575    | 385   | 532   | 293   | 956    | 316   |
| Tcirg1    | 0.629226 | 3.617897 | 4.661396 | 0.0308481   | 0.581198 | 135    | 129   | 126   | 93    | 165    | 113   |
| Scai      | 0.628184 | 4.728846 | 7.799529 | 0.005225985 | 0.222943 | 220    | 253   | 208   | 171   | 359    | 158   |
| Gapdh     | 0.626676 | 5.032133 | 7.237972 | 0.007137757 | 0.26433  | 220    | 146   | 219   | 107   | 401    | 115   |
| Kank4     | 0.621978 | 5.920637 | 7.655503 | 0.00565994  | 0.232403 | 67     | 68    | 53    | 37    | 128    | 32    |
| Megf11    | 0.620218 | 5.172718 | 4.984057 | 0.025581929 | 0.531391 | 30     | 48    | 32    | 20    | 58     | 32    |
| Ankrd27   | 0.619722 | 5.271027 | 11.07438 | 0.000875288 | 0.073565 | 285    | 210   | 180   | 163   | 376    | 138   |
| Cacna2d1  | 0.617079 | 7.040251 | 7.499491 | 0.006171644 | 0.246571 | 58     | 55    | 34    | 57    | 66     | 20    |
| Mmp15     | 0.613909 | 5.537625 | 11.3107  | 0.000770618 | 0.068441 | 149    | 109   | 107   | 115   | 171    | 67    |
| Oas1      | 0.610956 | 6.303554 | 8.437949 | 0.003674705 | 0.180514 | 1973   | 1192  | 1360  | 753   | 2680   | 1115  |
| Krt6a     | 0.609982 | 12.23232 | 8.795434 | 0.003019855 | 0.163254 | 114663 | 78089 | 84813 | 46217 | 137584 | 81565 |
| Zeb2      | 0.609941 | 6.816022 | 8.463185 | 0.003624066 | 0.179667 | 119    | 129   | 89    | 82    | 136    | 99    |
| Zfp385a   | 0.603043 | 3.816662 | 4.370989 | 0.036555774 | 0.634251 | 92     | 77    | 46    | 49    | 120    | 45    |
| Mt1       | 0.601001 | 9.061105 | 10.98624 | 0.000917909 | 0.075755 | 7357   | 6339  | 6239  | 4343  | 9743   | 5129  |
| Filip1l   | 0.600301 | 4.083625 | 4.003854 | 0.045396341 | 0.70068  | 357    | 197   | 262   | 234   | 443    | 129   |
| Sfxn2     | 0.59702  | 3.983535 | 3.88431  | 0.0487393   | 0.719256 | 188    | 216   | 170   | 119   | 321    | 138   |
| Inf2      | 0.595773 | 5.307142 | 8.031979 | 0.004595861 | 0.208617 | 135    | 102   | 111   | 83    | 144    | 96    |
| Tmem183a  | 0.595268 | 6.259186 | 13.69119 | 0.000215463 | 0.028237 | 960    | 543   | 707   | 458   | 1019   | 584   |
| Shroom3   | 0.595006 | 5.545939 | 8.239845 | 0.004098062 | 0.194679 | 868    | 457   | 520   | 356   | 876    | 490   |
| Glrx      | 0.593146 | 4.489313 | 4.151467 | 0.041598471 | 0.674478 | 108    | 137   | 129   | 73    | 277    | 60    |
| Pglyrp1   | 0.592424 | 6.971844 | 4.103579 | 0.042792533 | 0.684553 | 3157   | 1961  | 2185  | 1163  | 4197   | 1849  |
| Stom      | 0.59207  | 6.334152 | 11.67576 | 0.000633196 | 0.059234 | 1808   | 1122  | 1173  | 863   | 1988   | 1025  |
| Ccdc28b   | 0.587656 | 3.955575 | 5.595338 | 0.018008333 | 0.446906 | 101    | 117   | 98    | 77    | 173    | 65    |
| Sod3      | 0.586665 | 5.556628 | 8.503708 | 0.003544234 | 0.176975 | 819    | 687   | 679   | 431   | 920    | 654   |
| Pkm2      | 0.583819 | 9.199122 | 11.60476 | 0.000657832 | 0.061008 | 5512   | 3913  | 4339  | 2325  | 6930   | 3830  |
| Plekho1   | 0.582559 | 5.121365 | 3.950739 | 0.046850792 | 0.705555 | 63     | 43    | 45    | 15    | 84     | 47    |
| Impdh1    | 0.582077 | 5.621416 | 4.300078 | 0.038110631 | 0.64566  | 41     | 40    | 34    | 25    | 32     | 45    |
| Ifi271l   | 0.576546 | 7.008507 | 13.04776 | 0.000303648 | 0.036096 | 1133   | 925   | 945   | 620   | 1556   | 722   |
| Zfpm1     | 0.576014 | 3.551078 | 4.704648 | 0.030081165 | 0.575312 | 104    | 101   | 94    | 61    | 158    | 72    |
| Slc35d1   | 0.575186 | 3.401966 | 3.888424 | 0.048620023 | 0.719107 | 129    | 108   | 155   | 90    | 181    | 98    |
| Rbp1      | 0.571433 | 6.960831 | 8.570919 | 0.003415747 | 0.173743 | 2377   | 1789  | 2052  | 1136  | 3451   | 1491  |
| Ilk       | 0.571059 | 4.008556 | 3.857181 | 0.049533479 | 0.723041 | 98     | 76    | 121   | 71    | 138    | 69    |
| 9530091CC | 0.570376 | 4.298111 | 4.113701 | 0.042537176 | 0.682498 | 276    | 298   | 380   | 205   | 436    | 257   |
| Acpl2     | 0.570072 | 4.947393 | 6.462181 | 0.01101943  | 0.333966 | 596    | 457   | 449   | 320   | 847    | 312   |

|           |          |          |          |             |          |       |       |       |       |       |       |
|-----------|----------|----------|----------|-------------|----------|-------|-------|-------|-------|-------|-------|
| Pcdh7     | 0.567522 | 6.880277 | 17.52439 | 2.83645E-05 | 0.006706 | 1037  | 775   | 871   | 581   | 1481  | 559   |
| Igf1      | 0.564615 | 4.406153 | 4.982073 | 0.025611276 | 0.531391 | 98    | 100   | 116   | 62    | 161   | 79    |
| Med11     | 0.552999 | 3.802849 | 5.450234 | 0.019565705 | 0.466714 | 149   | 109   | 116   | 98    | 189   | 68    |
| Pcbp4     | 0.550933 | 5.68969  | 4.146473 | 0.041721342 | 0.675453 | 23    | 40    | 44    | 36    | 44    | 20    |
| Dock11    | 0.550848 | 5.303067 | 6.912371 | 0.008560142 | 0.292814 | 362   | 203   | 225   | 204   | 402   | 138   |
| Ddit4     | 0.550513 | 6.587969 | 6.273603 | 0.012254968 | 0.354032 | 386   | 328   | 309   | 179   | 469   | 292   |
| Dusp1     | 0.548482 | 4.995334 | 6.796925 | 0.0091315   | 0.302732 | 376   | 497   | 412   | 289   | 610   | 318   |
| Samd9l    | 0.548245 | 5.741724 | 7.412731 | 0.006476395 | 0.250929 | 1256  | 898   | 779   | 615   | 1556  | 626   |
| Slc35e4   | 0.547299 | 4.212664 | 4.514072 | 0.033617119 | 0.607959 | 128   | 98    | 106   | 70    | 119   | 101   |
| Ly6e      | 0.546083 | 8.439314 | 11.89997 | 0.00056135  | 0.054161 | 8491  | 4985  | 5922  | 3752  | 10976 | 3992  |
| Sec11c    | 0.541859 | 5.362518 | 7.416564 | 0.006462611 | 0.250929 | 232   | 195   | 310   | 167   | 384   | 153   |
| Zfp358    | 0.540125 | 3.8114   | 4.509114 | 0.033714703 | 0.608529 | 154   | 100   | 113   | 70    | 179   | 90    |
| Nudt7     | 0.539782 | 3.943892 | 6.352287 | 0.011723007 | 0.344294 | 212   | 160   | 161   | 129   | 284   | 96    |
| Ifit3     | 0.535975 | 5.259431 | 4.386753 | 0.036219229 | 0.631987 | 626   | 472   | 451   | 249   | 870   | 369   |
| Neat1     | 0.535503 | 8.677158 | 7.951521 | 0.004804697 | 0.21315  | 4818  | 5701  | 5318  | 3750  | 7314  | 3712  |
| Serinc2   | 0.534732 | 5.858619 | 5.172731 | 0.022944125 | 0.506052 | 1237  | 704   | 846   | 374   | 1633  | 672   |
| Stfa3     | 0.527132 | 3.767406 | 4.001769 | 0.045452546 | 0.701044 | 310   | 230   | 267   | 157   | 383   | 199   |
| Dip2a     | 0.526233 | 4.371574 | 5.288841 | 0.021462503 | 0.489181 | 142   | 107   | 147   | 105   | 198   | 68    |
| Tmem176c  | 0.526198 | 6.1684   | 12.1659  | 0.000486712 | 0.048941 | 551   | 491   | 576   | 353   | 765   | 376   |
| Tigd2     | 0.524438 | 5.160851 | 9.397781 | 0.002172483 | 0.130567 | 412   | 335   | 275   | 260   | 505   | 188   |
| Cxcl16    | 0.521357 | 4.384319 | 5.589745 | 0.018065925 | 0.447036 | 356   | 267   | 208   | 161   | 402   | 198   |
| Zfp513    | 0.520834 | 4.141898 | 5.697497 | 0.016989125 | 0.433757 | 185   | 206   | 184   | 137   | 286   | 118   |
| Gmppa     | 0.520001 | 4.663667 | 8.001092 | 0.004674915 | 0.209553 | 347   | 232   | 303   | 178   | 397   | 218   |
| Spats2    | 0.518613 | 4.829132 | 5.636001 | 0.017595296 | 0.441171 | 220   | 203   | 136   | 135   | 250   | 123   |
| Chchd6    | 0.518438 | 5.246524 | 5.873456 | 0.015370851 | 0.409306 | 246   | 191   | 175   | 139   | 277   | 138   |
| 1600029D  | 0.517886 | 9.969925 | 11.39737 | 0.000735482 | 0.066771 | 27199 | 14336 | 19287 | 12376 | 30527 | 12849 |
| Gpha2     | 0.516416 | 4.490986 | 4.313277 | 0.037816059 | 0.643489 | 447   | 334   | 535   | 231   | 665   | 324   |
| Dnm3      | 0.511519 | 7.515206 | 5.272309 | 0.021667252 | 0.489818 | 44    | 66    | 39    | 26    | 78    | 35    |
| Lrig2     | 0.510645 | 4.937837 | 6.19102  | 0.012840019 | 0.362383 | 289   | 199   | 176   | 178   | 247   | 148   |
| Rnf208    | 0.508854 | 7.110025 | 8.439918 | 0.003670728 | 0.180514 | 1036  | 566   | 642   | 377   | 1087  | 552   |
| Arl4c     | 0.50813  | 5.520069 | 10.62671 | 0.001114657 | 0.082986 | 335   | 233   | 256   | 177   | 379   | 186   |
| Itih5     | 0.506896 | 6.90761  | 13.64929 | 0.000220325 | 0.028386 | 690   | 548   | 491   | 441   | 755   | 353   |
| Mon1b     | 0.50596  | 4.042429 | 4.534628 | 0.033215675 | 0.605326 | 255   | 121   | 169   | 115   | 222   | 133   |
| Slc2a8    | 0.5005   | 4.246041 | 4.176992 | 0.040976364 | 0.668622 | 155   | 129   | 113   | 65    | 194   | 102   |
| Dsg1b     | 0.498952 | 5.995976 | 10.89731 | 0.000963041 | 0.075755 | 1562  | 984   | 1308  | 811   | 1754  | 867   |
| Ckmt1     | 0.49885  | 6.793719 | 8.30165  | 0.003960907 | 0.190374 | 1285  | 1059  | 889   | 602   | 1313  | 889   |
| Mxd1      | 0.494295 | 7.830339 | 8.019142 | 0.004628549 | 0.209218 | 5598  | 3638  | 4107  | 2393  | 6744  | 3019  |
| Armc5     | 0.494169 | 4.206411 | 3.872083 | 0.049095565 | 0.720347 | 181   | 167   | 138   | 121   | 280   | 67    |
| Fam132a   | 0.492695 | 4.24115  | 4.926081 | 0.026454249 | 0.541055 | 239   | 194   | 161   | 156   | 259   | 114   |
| Dtna      | 0.492458 | 6.087402 | 4.124039 | 0.042278032 | 0.679353 | 54    | 82    | 87    | 36    | 111   | 59    |
| Dab2      | 0.491641 | 4.420909 | 4.16438  | 0.041282524 | 0.671202 | 213   | 237   | 177   | 146   | 307   | 126   |
| Tep1      | 0.489392 | 4.574768 | 4.421972 | 0.035479014 | 0.625721 | 287   | 267   | 373   | 200   | 443   | 202   |
| Lgals7    | 0.488635 | 5.303457 | 6.021807 | 0.014130172 | 0.386308 | 783   | 795   | 654   | 521   | 1220  | 382   |
| Scd1      | 0.48737  | 7.454021 | 4.400296 | 0.035932686 | 0.62938  | 741   | 535   | 364   | 225   | 798   | 441   |
| Grin1     | 0.486879 | 5.992312 | 4.257048 | 0.039087781 | 0.654359 | 61    | 25    | 48    | 26    | 56    | 35    |
| Sid2      | 0.48589  | 6.073105 | 6.4088   | 0.011355612 | 0.338873 | 1057  | 684   | 878   | 419   | 1139  | 715   |
| Fam162a   | 0.485429 | 6.006148 | 7.991141 | 0.004700677 | 0.209834 | 907   | 830   | 948   | 573   | 1408  | 524   |
| Magi1     | 0.485358 | 6.487522 | 7.343513 | 0.006730519 | 0.256308 | 119   | 113   | 154   | 76    | 204   | 77    |
| Parm1     | 0.484455 | 8.280592 | 6.753734 | 0.00935517  | 0.305441 | 1047  | 1077  | 904   | 499   | 1433  | 798   |
| Rfng      | 0.481275 | 5.067725 | 7.062937 | 0.007869487 | 0.279927 | 386   | 302   | 381   | 205   | 491   | 255   |
| Tns1      | 0.480867 | 7.16856  | 12.03257 | 0.00052279  | 0.0514   | 236   | 191   | 240   | 144   | 303   | 147   |
| Upp1      | 0.478862 | 5.135118 | 3.841626 | 0.04999502  | 0.725996 | 841   | 605   | 603   | 372   | 959   | 487   |
| Vopp1     | 0.474527 | 6.067232 | 8.484862 | 0.003581137 | 0.17836  | 960   | 703   | 599   | 495   | 943   | 515   |
| BC100530  | 0.473746 | 9.969487 | 7.490196 | 0.00620358  | 0.246811 | 22406 | 20169 | 17727 | 11333 | 31186 | 12966 |
| Dennd4a   | 0.469705 | 4.484449 | 4.091712 | 0.043093976 | 0.68529  | 133   | 78    | 101   | 53    | 139   | 79    |
| Tpm2      | 0.46765  | 7.326003 | 5.50409  | 0.018972049 | 0.458655 | 2770  | 3001  | 3187  | 1755  | 5056  | 1708  |
| Ifnar2    | 0.467397 | 5.499852 | 4.886121 | 0.027073453 | 0.547313 | 406   | 265   | 411   | 164   | 499   | 284   |
| Prr13     | 0.466843 | 8.074541 | 7.780133 | 0.00528239  | 0.223293 | 3723  | 2377  | 2876  | 1413  | 4713  | 2015  |
| Slc39a5   | 0.465075 | 5.290979 | 6.653096 | 0.009898366 | 0.315049 | 197   | 146   | 194   | 97    | 261   | 121   |
| 1110059E2 | 0.464847 | 5.704466 | 8.727039 | 0.003135253 | 0.165982 | 837   | 484   | 725   | 476   | 848   | 428   |
| Ankrd29   | 0.464648 | 4.239205 | 4.576074 | 0.032421424 | 0.598041 | 202   | 146   | 199   | 119   | 282   | 97    |
| Eps8      | 0.460867 | 5.587775 | 4.285168 | 0.038446279 | 0.646258 | 1169  | 670   | 856   | 503   | 1463  | 499   |
| 1110051M  | 0.460241 | 4.9634   | 4.050366 | 0.044161765 | 0.691546 | 80    | 56    | 57    | 54    | 62    | 45    |
| Pfkl      | 0.458956 | 6.01413  | 5.821686 | 0.015829761 | 0.415865 | 710   | 710   | 620   | 366   | 1028  | 458   |
| Slc25a1   | 0.456443 | 7.409823 | 8.300272 | 0.003963915 | 0.190374 | 1313  | 1097  | 1249  | 625   | 1623  | 932   |



|           |          |          |          |             |          |       |       |       |       |       |       |
|-----------|----------|----------|----------|-------------|----------|-------|-------|-------|-------|-------|-------|
| Clybl     | 0.456411 | 5.483237 | 4.931141 | 0.026376889 | 0.541015 | 241   | 198   | 150   | 105   | 258   | 147   |
| Osmr      | 0.455187 | 4.700726 | 5.131951 | 0.023489305 | 0.514136 | 577   | 318   | 485   | 318   | 563   | 288   |
| Btrc      | 0.452693 | 4.916223 | 3.930686 | 0.047412587 | 0.711107 | 109   | 146   | 119   | 74    | 213   | 65    |
| Parp12    | 0.452217 | 4.650769 | 5.275226 | 0.021630982 | 0.489818 | 529   | 347   | 430   | 252   | 553   | 309   |
| Mtap1a    | 0.451888 | 9.880104 | 7.96945  | 0.00475734  | 0.211858 | 183   | 121   | 172   | 94    | 243   | 88    |
| Wnk2      | 0.451674 | 4.851456 | 5.600604 | 0.017954291 | 0.446595 | 585   | 374   | 533   | 296   | 648   | 338   |
| Pbp2      | 0.450399 | 5.825471 | 5.876146 | 0.015347377 | 0.409187 | 1577  | 826   | 1129  | 726   | 1474  | 778   |
| Fam172a   | 0.448183 | 5.438973 | 7.133144 | 0.007567194 | 0.273798 | 421   | 366   | 359   | 250   | 606   | 192   |
| Muc4      | 0.44636  | 9.103555 | 9.232199 | 0.002377959 | 0.136803 | 14521 | 8182  | 11479 | 6649  | 15579 | 7274  |
| Sirpa     | 0.446136 | 5.38849  | 4.462284 | 0.034651145 | 0.618296 | 587   | 360   | 343   | 242   | 680   | 238   |
| Cdk2ap1   | 0.445286 | 5.041951 | 5.824717 | 0.015802512 | 0.415865 | 453   | 405   | 338   | 236   | 560   | 258   |
| Rab3a     | 0.443464 | 8.267613 | 7.227247 | 0.007180524 | 0.265002 | 153   | 118   | 117   | 65    | 198   | 81    |
| Cda       | 0.440216 | 6.547859 | 5.601833 | 0.017941694 | 0.446595 | 1495  | 1199  | 1122  | 610   | 1763  | 940   |
| Ankrd54   | 0.437771 | 4.237666 | 5.100775 | 0.02391515  | 0.516307 | 280   | 242   | 219   | 173   | 302   | 156   |
| Tgfb1     | 0.437545 | 8.837142 | 7.695231 | 0.005536691 | 0.230421 | 10348 | 8009  | 8573  | 5912  | 11476 | 5650  |
| 2610203C2 | 0.437486 | 4.452797 | 3.868005 | 0.049214986 | 0.720347 | 191   | 149   | 217   | 147   | 194   | 119   |
| Oxa1l     | 0.435223 | 4.868804 | 5.27765  | 0.021600884 | 0.489741 | 367   | 292   | 270   | 217   | 426   | 168   |
| Smox      | 0.435154 | 6.607025 | 5.716186 | 0.016809205 | 0.431069 | 1757  | 1095  | 1431  | 768   | 1712  | 1071  |
| Pik3c3    | 0.431636 | 4.866199 | 5.122425 | 0.023618583 | 0.515307 | 272   | 205   | 244   | 140   | 321   | 159   |
| Stat2     | 0.431072 | 5.14928  | 3.987718 | 0.045833091 | 0.703111 | 307   | 288   | 243   | 159   | 333   | 212   |
| Rab34     | 0.43091  | 4.728428 | 3.96257  | 0.046522637 | 0.704916 | 313   | 243   | 243   | 165   | 314   | 188   |
| Casp9     | 0.424938 | 4.624597 | 4.115841 | 0.042483408 | 0.682144 | 329   | 212   | 320   | 199   | 387   | 155   |
| Ank1      | 0.422288 | 4.731514 | 3.92429  | 0.047593297 | 0.712112 | 702   | 375   | 587   | 363   | 737   | 313   |
| 2310001A2 | 0.409218 | 4.734806 | 4.104084 | 0.042779747 | 0.684553 | 237   | 173   | 176   | 163   | 230   | 95    |
| Il6st     | 0.408522 | 5.365105 | 4.558625 | 0.032753362 | 0.602741 | 352   | 221   | 225   | 134   | 323   | 198   |
| Ldha      | 0.408408 | 7.704241 | 10.3859  | 0.001269815 | 0.090518 | 3103  | 2336  | 2707  | 1661  | 3729  | 1600  |
| Pde4d     | 0.404579 | 5.255696 | 4.194906 | 0.040545594 | 0.665938 | 195   | 114   | 128   | 96    | 166   | 94    |
| Ndufa4    | 0.40414  | 7.08726  | 8.735936 | 0.003119991 | 0.165982 | 1976  | 1160  | 1513  | 1016  | 2123  | 815   |
| Nucb2     | 0.402858 | 5.055274 | 4.534097 | 0.033225973 | 0.605326 | 536   | 462   | 424   | 259   | 642   | 311   |
| Pdlim7    | 0.399118 | 6.555864 | 4.778317 | 0.028820278 | 0.563705 | 203   | 147   | 117   | 85    | 180   | 116   |
| Rab24     | 0.399017 | 6.957075 | 6.452034 | 0.011082542 | 0.333966 | 1167  | 1004  | 1045  | 600   | 1338  | 742   |
| BC056474  | 0.39484  | 5.339863 | 5.713738 | 0.016832662 | 0.431157 | 534   | 376   | 381   | 253   | 580   | 256   |
| Mrps9     | 0.393307 | 5.194357 | 4.367968 | 0.036620635 | 0.634251 | 382   | 228   | 366   | 194   | 474   | 171   |
| Tmsb10    | 0.393111 | 5.851843 | 5.435489 | 0.01973157  | 0.468392 | 322   | 253   | 267   | 155   | 380   | 177   |
| Lyst      | 0.392338 | 4.725273 | 4.079729 | 0.043400613 | 0.686623 | 205   | 172   | 228   | 114   | 257   | 135   |
| Limd2     | 0.391347 | 5.160957 | 4.899497 | 0.026864517 | 0.544785 | 315   | 267   | 275   | 229   | 297   | 165   |
| Mapk11    | 0.390699 | 5.300848 | 5.803991 | 0.015989841 | 0.416022 | 331   | 202   | 224   | 177   | 329   | 126   |
| Ube2a     | 0.390426 | 5.231424 | 5.117954 | 0.023679526 | 0.515677 | 493   | 329   | 398   | 269   | 474   | 250   |
| Msn       | 0.388616 | 7.810328 | 5.19707  | 0.022624988 | 0.502143 | 324   | 322   | 276   | 165   | 366   | 228   |
| Serpinb1a | 0.388495 | 6.334673 | 5.563403 | 0.018339732 | 0.449928 | 1106  | 753   | 666   | 540   | 1260  | 391   |
| Trim25    | 0.387654 | 6.575251 | 6.236134 | 0.012516943 | 0.358473 | 2323  | 1427  | 1643  | 1006  | 2375  | 1103  |
| Rgnef     | 0.3876   | 4.849792 | 4.06308  | 0.043830474 | 0.690378 | 458   | 296   | 302   | 238   | 485   | 171   |
| Ctsh      | 0.386932 | 6.69731  | 6.770688 | 0.009266712 | 0.304866 | 2297  | 1818  | 1892  | 1240  | 2730  | 1130  |
| Col5a2    | 0.385659 | 6.033521 | 8.151862 | 0.004301697 | 0.200336 | 1462  | 939   | 1064  | 807   | 1382  | 640   |
| Capn2     | 0.384951 | 7.820196 | 5.771099 | 0.016291841 | 0.420306 | 3644  | 2587  | 2610  | 1477  | 3884  | 1985  |
| Ldhb      | 0.384588 | 7.357348 | 3.963342 | 0.046501285 | 0.704916 | 125   | 71    | 53    | 55    | 99    | 49    |
| Tgm2      | 0.381366 | 9.151631 | 6.459755 | 0.011034484 | 0.333966 | 13680 | 9681  | 11878 | 6498  | 15682 | 7287  |
| Prkce     | 0.380874 | 8.399661 | 5.588775 | 0.018075929 | 0.447036 | 453   | 258   | 249   | 174   | 368   | 224   |
| Slc9a9    | 0.380363 | 7.318099 | 4.674369 | 0.030615949 | 0.580381 | 236   | 186   | 159   | 84    | 294   | 121   |
| Rnf19a    | 0.378657 | 5.899207 | 5.563338 | 0.018340415 | 0.449928 | 316   | 304   | 252   | 195   | 379   | 159   |
| Hdac1     | 0.376444 | 5.023254 | 4.518284 | 0.033534451 | 0.607346 | 632   | 415   | 507   | 309   | 695   | 293   |
| Slc39a1   | 0.375948 | 5.571921 | 5.45384  | 0.019525358 | 0.466714 | 952   | 516   | 726   | 454   | 951   | 402   |
| Sobp      | 0.375638 | 5.579599 | 4.021103 | 0.044936273 | 0.699601 | 148   | 137   | 140   | 90    | 217   | 62    |
| Cat       | 0.374521 | 5.912064 | 5.783023 | 0.016181683 | 0.419417 | 230   | 232   | 231   | 139   | 328   | 125   |
| C03004610 | 0.371344 | 7.733351 | 5.446719 | 0.019605117 | 0.467136 | 4041  | 2902  | 3043  | 1641  | 4081  | 2358  |
| Krt6b     | 0.369826 | 11.6203  | 4.716959 | 0.02986651  | 0.573757 | 78886 | 54924 | 65844 | 31431 | 88328 | 45097 |
| Oaz1      | 0.369776 | 5.672646 | 6.662707 | 0.009845125 | 0.314284 | 629   | 485   | 516   | 340   | 697   | 311   |
| Kcnq1ot1  | 0.367748 | 6.31991  | 4.955794 | 0.026003381 | 0.535909 | 1186  | 1291  | 1185  | 830   | 1748  | 591   |
| Tmem176f  | 0.364974 | 6.691367 | 5.166101 | 0.023031856 | 0.506183 | 1005  | 794   | 645   | 581   | 932   | 453   |
| Zcchc24   | 0.364834 | 5.63815  | 4.007481 | 0.045298781 | 0.700601 | 237   | 175   | 159   | 127   | 250   | 96    |
| Tpi1      | 0.363888 | 6.967635 | 5.491221 | 0.019112196 | 0.459461 | 1069  | 770   | 949   | 447   | 1405  | 538   |
| Hspg2     | 0.363281 | 5.77803  | 4.641045 | 0.031215983 | 0.585565 | 296   | 275   | 274   | 156   | 350   | 187   |
| Gpi1      | 0.360888 | 7.855084 | 8.867849 | 0.002902369 | 0.158899 | 1870  | 1442  | 1563  | 880   | 2155  | 1000  |
| Snd1      | 0.360585 | 5.874195 | 5.017846 | 0.025087352 | 0.527777 | 911   | 613   | 550   | 390   | 810   | 452   |
| Sdcbp     | 0.360455 | 7.909569 | 8.316303 | 0.003929081 | 0.189547 | 2024  | 1399  | 1629  | 950   | 2220  | 994   |

|           |          |          |          |             |          |       |       |       |       |       |       |
|-----------|----------|----------|----------|-------------|----------|-------|-------|-------|-------|-------|-------|
| Sharpin   | 0.354511 | 4.995635 | 5.170118 | 0.022978649 | 0.506052 | 367   | 274   | 282   | 202   | 351   | 184   |
| Cbr2      | 0.35362  | 9.820513 | 4.787808 | 0.028661885 | 0.562141 | 22152 | 16281 | 18801 | 9380  | 24312 | 12792 |
| Capg      | 0.353548 | 7.911374 | 3.902096 | 0.04822591  | 0.718364 | 5426  | 4235  | 4462  | 2416  | 5997  | 3090  |
| Ttl       | 0.351995 | 7.719209 | 4.181107 | 0.040876999 | 0.66832  | 264   | 221   | 334   | 173   | 385   | 133   |
| Plbd2     | 0.351618 | 6.175019 | 4.671536 | 0.030666497 | 0.580542 | 327   | 276   | 318   | 203   | 312   | 205   |
| Dlg5      | 0.351116 | 5.002561 | 3.873688 | 0.049048621 | 0.720347 | 512   | 371   | 424   | 251   | 508   | 282   |
| Smap2     | 0.350209 | 6.076976 | 5.341448 | 0.020824173 | 0.482296 | 367   | 281   | 349   | 232   | 376   | 188   |
| Ehd3      | 0.347452 | 8.253484 | 4.163547 | 0.041302834 | 0.671202 | 807   | 724   | 573   | 334   | 882   | 490   |
| Cldn7     | 0.343423 | 7.77474  | 5.051792 | 0.02460048  | 0.525071 | 5663  | 3975  | 4391  | 2473  | 5821  | 2971  |
| Tpm4      | 0.340442 | 6.700133 | 4.10147  | 0.042845952 | 0.684586 | 2055  | 1544  | 1676  | 1415  | 2012  | 786   |
| Prkca     | 0.338533 | 7.179291 | 4.029655 | 0.044707072 | 0.698053 | 353   | 298   | 337   | 210   | 492   | 139   |
| Psma3     | 0.33537  | 6.075794 | 4.724559 | 0.029734803 | 0.573757 | 687   | 592   | 532   | 436   | 690   | 316   |
| Klf9      | 0.335067 | 8.092786 | 5.279863 | 0.021573443 | 0.489635 | 1707  | 1282  | 1397  | 889   | 1518  | 966   |
| Gyk       | 0.334953 | 5.751856 | 3.888755 | 0.048610432 | 0.719107 | 1146  | 674   | 938   | 699   | 1026  | 437   |
| Zfc3h1    | 0.334712 | 5.85405  | 4.730167 | 0.029638004 | 0.573463 | 945   | 632   | 675   | 575   | 844   | 355   |
| Ifngr1    | 0.334123 | 6.24533  | 5.696924 | 0.016994671 | 0.433757 | 1363  | 940   | 1029  | 578   | 1403  | 691   |
| Aldoa     | 0.333946 | 9.774597 | 6.122384 | 0.013348065 | 0.373954 | 5188  | 4074  | 4351  | 2289  | 5948  | 2837  |
| Cstb      | 0.330112 | 7.700128 | 5.235941 | 0.022124832 | 0.494842 | 4850  | 2926  | 3685  | 2001  | 5206  | 2136  |
| Apod      | 0.328027 | 10.38769 | 4.306621 | 0.037964289 | 0.644349 | 10398 | 7724  | 6216  | 4008  | 10759 | 4955  |
| Itga6     | 0.313608 | 9.201915 | 4.846474 | 0.027702707 | 0.551899 | 10853 | 8753  | 10062 | 5306  | 10891 | 6657  |
| Dab2ip    | 0.312138 | 6.578239 | 5.046749 | 0.024672183 | 0.525071 | 1053  | 837   | 843   | 555   | 950   | 581   |
| Ufsp2     | 0.312002 | 6.39933  | 3.954324 | 0.046751102 | 0.705555 | 711   | 561   | 662   | 301   | 943   | 360   |
| Tspan5    | 0.307026 | 6.657717 | 6.08017  | 0.013670758 | 0.378264 | 1530  | 1162  | 1582  | 918   | 1670  | 768   |
| Raph1     | 0.306265 | 6.58075  | 5.776537 | 0.016241509 | 0.420015 | 979   | 567   | 690   | 469   | 845   | 407   |
| Fbln5     | 0.304277 | 6.288745 | 4.616921 | 0.031658021 | 0.590255 | 878   | 658   | 771   | 470   | 848   | 458   |
| Vps36     | 0.297004 | 5.63755  | 4.926747 | 0.026444046 | 0.541055 | 924   | 614   | 729   | 490   | 879   | 389   |
| Dirc2     | 0.296904 | 5.624128 | 3.948329 | 0.046917935 | 0.705555 | 574   | 365   | 543   | 308   | 627   | 239   |
| Col6a2    | 0.296513 | 6.735618 | 4.05332  | 0.044084562 | 0.691344 | 2295  | 2112  | 1898  | 1291  | 2224  | 1296  |
| Tpp1      | 0.294448 | 6.324951 | 4.23898  | 0.039505891 | 0.656377 | 1175  | 800   | 973   | 574   | 1187  | 539   |
| Pptc7     | 0.293916 | 7.525937 | 4.02726  | 0.044770596 | 0.698307 | 2678  | 1677  | 1983  | 1102  | 2548  | 1256  |
| Ssh2      | 0.292401 | 6.356147 | 4.431376 | 0.035284043 | 0.625347 | 1198  | 670   | 841   | 612   | 942   | 477   |
| Ppp2r2d   | 0.290973 | 6.377653 | 4.648123 | 0.031087517 | 0.584174 | 634   | 569   | 559   | 343   | 685   | 344   |
| S100a11   | 0.290292 | 10.57709 | 4.382029 | 0.036319749 | 0.631987 | 38878 | 26958 | 31873 | 16990 | 39286 | 19515 |
| 1190003J1 | 0.287957 | 7.373791 | 4.090116 | 0.043134685 | 0.68529  | 4269  | 3105  | 3447  | 1892  | 4504  | 2085  |
| Atp6v1c1  | 0.285636 | 6.457112 | 4.652201 | 0.031013757 | 0.583808 | 554   | 417   | 471   | 263   | 584   | 276   |
| Hsd17b11  | 0.285246 | 6.766474 | 4.957208 | 0.025982132 | 0.535909 | 702   | 461   | 482   | 300   | 677   | 302   |
| Tmed9     | 0.282978 | 7.646833 | 6.444173 | 0.011131686 | 0.33451  | 3562  | 2250  | 3061  | 1805  | 3478  | 1549  |
| Rnh1      | 0.279904 | 7.434222 | 4.67782  | 0.030554498 | 0.580381 | 3877  | 2498  | 3196  | 1843  | 3751  | 1751  |
| H13       | 0.270527 | 6.832867 | 4.29309  | 0.038267566 | 0.646227 | 1198  | 917   | 846   | 626   | 1151  | 497   |
| Ccpg1     | 0.259664 | 6.455142 | 4.505848 | 0.03377915  | 0.608704 | 895   | 540   | 730   | 444   | 818   | 369   |
| Anxa5     | 0.259504 | 8.503199 | 4.338679 | 0.037255812 | 0.639741 | 2075  | 1389  | 1546  | 830   | 1979  | 990   |
| Eif1      | 0.25046  | 7.96032  | 4.963291 | 0.025890882 | 0.534862 | 2562  | 1851  | 2046  | 1378  | 2450  | 1050  |
| Aprt      | 0.250031 | 6.449095 | 3.979654 | 0.046053021 | 0.703111 | 1138  | 927   | 1051  | 602   | 1098  | 613   |
| Ccni      | 0.249401 | 7.271012 | 4.67527  | 0.030599894 | 0.580381 | 1416  | 1050  | 1348  | 728   | 1474  | 686   |
| Ckap4     | 0.240238 | 7.856084 | 4.012426 | 0.045166117 | 0.700601 | 5589  | 3588  | 4535  | 2711  | 5031  | 2406  |
| Rtn4      | 0.239339 | 9.160383 | 3.930177 | 0.047426944 | 0.711107 | 1705  | 1011  | 1337  | 715   | 1636  | 707   |
| Pgd       | 0.223017 | 7.008613 | 3.995676 | 0.045617145 | 0.702576 | 2549  | 1790  | 2149  | 1213  | 2559  | 1090  |

#### Downregulated genes

|         |          |          |          |             |          |     |     |     |     |     |    |
|---------|----------|----------|----------|-------------|----------|-----|-----|-----|-----|-----|----|
| Zbtb10  | -1.09129 | 3.80134  | 11.47546 | 0.000705211 | 0.064294 | 98  | 50  | 60  | 25  | 23  | 11 |
| Gab3    | -1.09113 | 2.396895 | 4.919374 | 0.026557135 | 0.542261 | 33  | 23  | 24  | 5   | 10  | 8  |
| Ptpru   | -1.08971 | 2.503395 | 5.663925 | 0.017317326 | 0.438869 | 36  | 23  | 40  | 8   | 20  | 3  |
| Rhof    | -1.0771  | 3.548735 | 4.289177 | 0.038355721 | 0.646227 | 23  | 5   | 34  | 6   | 8   | 4  |
| Pcdhga3 | -1.07208 | 2.270885 | 4.294534 | 0.038235069 | 0.646227 | 76  | 43  | 26  | 14  | 12  | 13 |
| Necab1  | -1.06537 | 5.203775 | 16.80892 | 4.13386E-05 | 0.008479 | 437 | 394 | 467 | 169 | 137 | 68 |
| Fxyd4   | -1.06509 | 2.86854  | 5.368552 | 0.020502993 | 0.479255 | 270 | 204 | 206 | 99  | 48  | 36 |
| Dok4    | -1.06144 | 4.23792  | 10.0729  | 0.001504659 | 0.101287 | 75  | 79  | 65  | 34  | 21  | 9  |
| Snx31   | -1.04517 | 3.163254 | 6.64376  | 0.009950372 | 0.31577  | 330 | 236 | 277 | 112 | 91  | 41 |
| Med18   | -1.04427 | 2.458836 | 5.44239  | 0.019653758 | 0.467777 | 91  | 75  | 68  | 36  | 30  | 5  |
| Gspt2   | -1.04366 | 3.717762 | 9.025766 | 0.002662003 | 0.149155 | 49  | 52  | 50  | 12  | 34  | 4  |
| Rimbp2  | -1.0319  | 4.485034 | 7.668737 | 0.005618577 | 0.232403 | 24  | 28  | 64  | 11  | 16  | 9  |
| Smyd4   | -1.0114  | 2.772638 | 4.831169 | 0.027949667 | 0.555277 | 140 | 61  | 62  | 32  | 18  | 21 |
| Dpy19l3 | -1.01063 | 3.058532 | 6.780439 | 0.009216224 | 0.304866 | 133 | 134 | 145 | 28  | 56  | 42 |
| Plagl1  | -1.01019 | 4.466814 | 5.773129 | 0.016273034 | 0.420306 | 17  | 19  | 26  | 8   | 5   | 6  |
| Dclk3   | -0.99624 | 4.264692 | 5.923704 | 0.01493852  | 0.402223 | 33  | 32  | 18  | 0   | 17  | 10 |
| Dnalc1  | -0.99534 | 3.479023 | 7.966263 | 0.004765724 | 0.211858 | 70  | 95  | 76  | 14  | 42  | 23 |

|           |          |          |          |             |          |      |      |      |      |      |     |
|-----------|----------|----------|----------|-------------|----------|------|------|------|------|------|-----|
| Mctp1     | -0.98155 | 4.968533 | 6.454282 | 0.011068529 | 0.333966 | 116  | 51   | 141  | 50   | 31   | 11  |
| C030030A  | -0.97907 | 4.20476  | 8.449999 | 0.003650436 | 0.180514 | 51   | 33   | 65   | 23   | 19   | 5   |
| Stfa1     | -0.97255 | 2.91781  | 5.375731 | 0.020418786 | 0.479255 | 277  | 224  | 197  | 30   | 164  | 54  |
| Arhgap31  | -0.96966 | 3.874854 | 8.384355 | 0.003784644 | 0.184232 | 41   | 41   | 37   | 9    | 16   | 13  |
| Sycp3     | -0.96932 | 3.448308 | 6.466166 | 0.010994751 | 0.333966 | 37   | 37   | 38   | 15   | 19   | 3   |
| Klhl23    | -0.96708 | 3.040284 | 6.75947  | 0.009325143 | 0.304924 | 88   | 58   | 91   | 32   | 32   | 11  |
| Mrgpre    | -0.96681 | 3.550541 | 9.498601 | 0.002056286 | 0.125775 | 62   | 50   | 50   | 19   | 27   | 7   |
| Slc25a33  | -0.96146 | 4.310894 | 10.90593 | 0.000958568 | 0.075755 | 57   | 41   | 50   | 11   | 29   | 9   |
| 3110021A1 | -0.95937 | 1.936831 | 4.092109 | 0.043083859 | 0.68529  | 68   | 94   | 61   | 17   | 54   | 11  |
| Ryr2      | -0.95631 | 4.845388 | 5.105071 | 0.023856007 | 0.516307 | 12   | 23   | 23   | 12   | 7    | 0   |
| 4930473A  | -0.95403 | 2.986069 | 8.776154 | 0.00305194  | 0.16431  | 93   | 81   | 90   | 26   | 51   | 13  |
| Pcdh9     | -0.95125 | 7.097144 | 5.092175 | 0.024034024 | 0.518152 | 30   | 5    | 58   | 8    | 22   | 2   |
| Ctnnd2    | -0.94804 | 5.165916 | 8.954302 | 0.00276817  | 0.153505 | 46   | 26   | 33   | 11   | 15   | 8   |
| Tmem201   | -0.94446 | 3.184417 | 5.483618 | 0.019195484 | 0.460949 | 110  | 49   | 88   | 12   | 45   | 24  |
| 3110062M  | -0.93668 | 2.573116 | 3.983505 | 0.04594786  | 0.703111 | 66   | 19   | 34   | 14   | 24   | 2   |
| Kctd4     | -0.93182 | 2.269698 | 4.10666  | 0.042714634 | 0.684325 | 47   | 19   | 47   | 11   | 13   | 11  |
| Rassf8    | -0.9287  | 2.373811 | 4.006546 | 0.045323917 | 0.700601 | 91   | 46   | 33   | 19   | 17   | 15  |
| Slc13a2   | -0.92751 | 3.677539 | 5.576975 | 0.018198125 | 0.449026 | 441  | 397  | 345  | 182  | 128  | 60  |
| Gm88      | -0.92536 | 3.700579 | 4.841918 | 0.027775981 | 0.552847 | 33   | 18   | 13   | 8    | 10   | 3   |
| D7Ertd443 | -0.92228 | 2.823232 | 4.425264 | 0.035410638 | 0.625721 | 223  | 133  | 244  | 53   | 107  | 43  |
| Sncg      | -0.922   | 9.917157 | 4.877011 | 0.027216704 | 0.547313 | 10   | 12   | 25   | 1    | 14   | 1   |
| Sept4     | -0.92042 | 5.257279 | 6.221398 | 0.01262154  | 0.359213 | 30   | 18   | 28   | 9    | 10   | 6   |
| Galnt14   | -0.91948 | 4.022379 | 4.542098 | 0.033071043 | 0.605326 | 33   | 26   | 11   | 8    | 10   | 5   |
| Chst2     | -0.91543 | 5.591271 | 14.61349 | 0.000131967 | 0.020138 | 180  | 97   | 139  | 56   | 65   | 17  |
| Trmt61a   | -0.91451 | 3.095241 | 5.289726 | 0.021451599 | 0.489181 | 90   | 133  | 65   | 32   | 58   | 14  |
| Mtap9     | -0.91173 | 5.902839 | 17.00668 | 3.72486E-05 | 0.008194 | 348  | 313  | 236  | 110  | 94   | 77  |
| Tox       | -0.90049 | 4.190932 | 14.62106 | 0.000131437 | 0.020138 | 411  | 325  | 330  | 121  | 181  | 63  |
| 8430427H  | -0.89282 | 3.840171 | 4.910323 | 0.026696641 | 0.542916 | 41   | 27   | 18   | 10   | 14   | 5   |
| Ntm       | -0.88866 | 4.037727 | 4.800275 | 0.028455191 | 0.560148 | 34   | 16   | 17   | 6    | 14   | 3   |
| Bend7     | -0.8816  | 3.869089 | 11.94148 | 0.00054898  | 0.053342 | 212  | 231  | 160  | 62   | 114  | 39  |
| Foxp2     | -0.87626 | 3.368451 | 5.071277 | 0.024325458 | 0.520783 | 28   | 29   | 49   | 12   | 18   | 7   |
| Prrx2     | -0.86488 | 2.299044 | 5.345575 | 0.020774931 | 0.482194 | 128  | 98   | 103  | 30   | 63   | 24  |
| Pcgf6     | -0.85928 | 2.669779 | 4.48414  | 0.034210762 | 0.613911 | 130  | 98   | 118  | 29   | 91   | 15  |
| Rimklb    | -0.85921 | 3.632032 | 7.299721 | 0.006896534 | 0.259331 | 160  | 110  | 122  | 61   | 53   | 18  |
| Garnl3    | -0.84658 | 4.859442 | 7.84137  | 0.00510639  | 0.221455 | 56   | 35   | 66   | 24   | 17   | 12  |
| Prkar1b   | -0.84588 | 8.120975 | 13.6818  | 0.000216543 | 0.028237 | 75   | 55   | 62   | 14   | 44   | 11  |
| Pex3      | -0.83302 | 4.476196 | 14.06554 | 0.000176549 | 0.024666 | 346  | 199  | 271  | 93   | 124  | 63  |
| Prss36    | -0.83114 | 2.842386 | 4.710267 | 0.029983001 | 0.574762 | 76   | 89   | 97   | 22   | 57   | 20  |
| Tmem199   | -0.83103 | 4.566329 | 10.88711 | 0.000968358 | 0.075764 | 134  | 175  | 189  | 58   | 75   | 43  |
| Zfp770    | -0.829   | 3.631835 | 6.102766 | 0.013497048 | 0.376391 | 79   | 41   | 97   | 18   | 50   | 13  |
| Hcfc2     | -0.8285  | 2.88612  | 4.709827 | 0.029990661 | 0.574762 | 204  | 151  | 141  | 44   | 80   | 48  |
| Disp1     | -0.8239  | 4.048061 | 12.5087  | 0.000405062 | 0.043646 | 241  | 182  | 238  | 67   | 106  | 59  |
| 2900060B1 | -0.82377 | 7.771424 | 9.661824 | 0.001881367 | 0.119762 | 3117 | 4347 | 3407 | 1640 | 1412 | 717 |
| Trib3     | -0.80866 | 3.29283  | 6.810947 | 0.009060072 | 0.301759 | 232  | 248  | 240  | 85   | 111  | 60  |
| Slc15a2   | -0.80682 | 3.999406 | 5.694216 | 0.017020917 | 0.433912 | 310  | 214  | 462  | 116  | 199  | 56  |
| Rbfox1    | -0.80478 | 7.626104 | 16.93006 | 3.87825E-05 | 0.00823  | 154  | 80   | 103  | 28   | 70   | 25  |
| Iqgap2    | -0.80356 | 4.192817 | 3.952621 | 0.046798426 | 0.705555 | 231  | 81   | 102  | 71   | 29   | 27  |
| Ttc36     | -0.80356 | 3.794955 | 5.086107 | 0.024118273 | 0.51857  | 390  | 440  | 404  | 183  | 179  | 77  |
| Fastkd2   | -0.79045 | 3.617737 | 9.495792 | 0.002059436 | 0.125775 | 129  | 101  | 152  | 42   | 73   | 27  |
| Lect1     | -0.78809 | 4.233472 | 6.475335 | 0.01093817  | 0.333351 | 568  | 335  | 382  | 153  | 297  | 52  |
| Dcbld1    | -0.77951 | 3.787546 | 7.045553 | 0.00794623  | 0.280741 | 133  | 95   | 72   | 31   | 39   | 34  |
| Exosc2    | -0.77262 | 3.372819 | 8.704559 | 0.003174152 | 0.166951 | 178  | 142  | 112  | 48   | 76   | 35  |
| Mical2    | -0.76944 | 3.753837 | 7.92477  | 0.004876254 | 0.215291 | 154  | 202  | 177  | 49   | 118  | 43  |
| Carns1    | -0.76866 | 4.982617 | 6.048746 | 0.013916178 | 0.382575 | 35   | 55   | 50   | 7    | 23   | 22  |
| Sgip1     | -0.76814 | 4.140561 | 4.641819 | 0.031201919 | 0.585565 | 65   | 18   | 46   | 15   | 24   | 8   |
| 4930430FC | -0.76071 | 3.046981 | 4.329076 | 0.037466569 | 0.642335 | 82   | 68   | 68   | 21   | 61   | 8   |
| Hibch     | -0.75933 | 2.857743 | 4.434858 | 0.035212148 | 0.625103 | 132  | 54   | 99   | 24   | 64   | 21  |
| Gm347     | -0.75899 | 3.482508 | 6.835707 | 0.008935333 | 0.298993 | 165  | 116  | 117  | 55   | 70   | 23  |
| Arhgap39  | -0.74865 | 4.590903 | 7.761872 | 0.005336062 | 0.224412 | 97   | 69   | 99   | 21   | 63   | 20  |
| Stat5a    | -0.73937 | 2.98387  | 5.176833 | 0.022890013 | 0.506052 | 138  | 100  | 184  | 35   | 85   | 42  |
| Zdhhc2    | -0.73548 | 6.993401 | 4.6693   | 0.03070644  | 0.580562 | 42   | 18   | 16   | 3    | 9    | 16  |
| Mtr       | -0.73128 | 3.579645 | 6.079273 | 0.013677707 | 0.378264 | 215  | 131  | 177  | 51   | 104  | 45  |
| Slc25a19  | -0.72814 | 4.230325 | 6.981152 | 0.008237257 | 0.287118 | 158  | 101  | 118  | 55   | 48   | 32  |
| Ntrk3     | -0.71472 | 5.153132 | 5.396129 | 0.020181464 | 0.476123 | 66   | 29   | 30   | 11   | 22   | 14  |
| Hunk      | -0.71332 | 3.907793 | 7.32274  | 0.006808752 | 0.25773  | 360  | 369  | 308  | 138  | 155  | 93  |

|           |          |          |          |             |          |      |      |      |      |      |      |
|-----------|----------|----------|----------|-------------|----------|------|------|------|------|------|------|
| Med12l    | -0.70908 | 3.56246  | 4.215762 | 0.04005007  | 0.662225 | 59   | 56   | 32   | 20   | 33   | 6    |
| Zfp275    | -0.70268 | 3.960277 | 7.782694 | 0.005274907 | 0.223293 | 131  | 107  | 100  | 32   | 75   | 28   |
| Snord89   | -0.69991 | 6.517628 | 6.89129  | 0.008661674 | 0.29395  | 704  | 1247 | 734  | 347  | 541  | 209  |
| Exosc1    | -0.69885 | 4.256425 | 5.407539 | 0.02004996  | 0.47406  | 350  | 341  | 186  | 129  | 125  | 72   |
| H2-Aa     | -0.69583 | 5.579804 | 6.397852 | 0.011425852 | 0.339574 | 351  | 272  | 178  | 88   | 210  | 41   |
| Pcsk6     | -0.69248 | 3.907196 | 6.528546 | 0.010615667 | 0.326762 | 199  | 141  | 125  | 54   | 107  | 28   |
| Abhd10    | -0.68617 | 4.487208 | 7.703018 | 0.005512857 | 0.23002  | 94   | 105  | 87   | 22   | 64   | 30   |
| Cbwd1     | -0.68305 | 3.228484 | 4.871111 | 0.027309906 | 0.548134 | 123  | 108  | 111  | 28   | 77   | 34   |
| Haus3     | -0.67999 | 3.265228 | 4.254212 | 0.039153104 | 0.654359 | 116  | 87   | 102  | 24   | 86   | 21   |
| Enpp4     | -0.67936 | 5.246512 | 13.46143 | 0.000243519 | 0.030462 | 441  | 274  | 425  | 120  | 254  | 88   |
| Trpv4     | -0.67818 | 3.424873 | 4.575253 | 0.032436959 | 0.598041 | 339  | 220  | 322  | 96   | 214  | 58   |
| Nop56     | -0.67552 | 5.280878 | 11.0513  | 0.000886251 | 0.073909 | 554  | 475  | 453  | 208  | 269  | 107  |
| Sumf2     | -0.67546 | 2.828481 | 4.719513 | 0.029822188 | 0.573757 | 96   | 80   | 74   | 22   | 52   | 26   |
| Rad1      | -0.67496 | 3.673047 | 3.981991 | 0.04598916  | 0.703111 | 114  | 77   | 180  | 58   | 55   | 28   |
| Mocs3     | -0.67417 | 3.162306 | 4.301973 | 0.038068176 | 0.645449 | 155  | 133  | 157  | 51   | 99   | 33   |
| Ptn       | -0.66785 | 6.994023 | 13.7608  | 0.000207623 | 0.02763  | 146  | 129  | 119  | 31   | 85   | 43   |
| Rap1gap2  | -0.66783 | 5.020521 | 5.992997 | 0.014362782 | 0.390603 | 73   | 56   | 81   | 36   | 26   | 18   |
| Dopey1    | -0.66641 | 4.315416 | 4.694149 | 0.03026548  | 0.576787 | 235  | 243  | 219  | 99   | 80   | 76   |
| Fam169a   | -0.66629 | 4.979427 | 6.341753 | 0.011792826 | 0.345217 | 995  | 466  | 1006 | 298  | 338  | 261  |
| Acyp1     | -0.66618 | 3.475723 | 4.409241 | 0.03574475  | 0.629365 | 100  | 42   | 105  | 31   | 42   | 22   |
| Mtap1b    | -0.66345 | 11.53992 | 8.645791 | 0.003278177 | 0.169785 | 246  | 154  | 153  | 91   | 83   | 37   |
| Kbtd11    | -0.66228 | 5.047356 | 7.536108 | 0.006047455 | 0.243665 | 440  | 181  | 357  | 126  | 145  | 92   |
| Creg2     | -0.66066 | 4.042184 | 4.380707 | 0.036347922 | 0.631987 | 89   | 159  | 113  | 35   | 98   | 27   |
| Mageh1    | -0.65962 | 4.018137 | 5.103331 | 0.023879949 | 0.516307 | 108  | 109  | 116  | 39   | 83   | 20   |
| Cntf      | -0.65938 | 5.676814 | 6.733539 | 0.00946167  | 0.307519 | 107  | 122  | 58   | 37   | 55   | 24   |
| Ankrd13b  | -0.65911 | 4.483775 | 5.333754 | 0.020916282 | 0.482801 | 72   | 86   | 49   | 17   | 39   | 27   |
| Epb4.1l3  | -0.65762 | 7.354412 | 7.04847  | 0.0079333   | 0.280741 | 55   | 46   | 56   | 17   | 23   | 22   |
| Zfp553    | -0.65491 | 3.756508 | 6.457503 | 0.011048482 | 0.333966 | 249  | 142  | 192  | 66   | 102  | 58   |
| Ahcyl2    | -0.65407 | 4.486229 | 5.804911 | 0.015981472 | 0.416022 | 159  | 128  | 93   | 52   | 62   | 34   |
| Rnaseh2a  | -0.6511  | 4.392115 | 8.207707 | 0.004171283 | 0.196819 | 349  | 252  | 281  | 98   | 198  | 69   |
| Tmem69    | -0.65052 | 3.46995  | 5.55834  | 0.018392843 | 0.450217 | 159  | 149  | 117  | 55   | 80   | 36   |
| Akr1b7    | -0.64864 | 5.812455 | 6.815765 | 0.009035661 | 0.301413 | 1895 | 1607 | 1426 | 790  | 750  | 361  |
| Spnb1     | -0.6462  | 6.019232 | 7.753127 | 0.005361962 | 0.224783 | 118  | 143  | 84   | 43   | 61   | 35   |
| Kctd12    | -0.64366 | 5.214055 | 8.818371 | 0.002982127 | 0.162029 | 1056 | 858  | 847  | 418  | 442  | 216  |
| Gpld1     | -0.64364 | 3.62173  | 5.150564 | 0.023238818 | 0.509691 | 234  | 196  | 186  | 68   | 115  | 63   |
| Zc3h10    | -0.64138 | 4.11077  | 6.414466 | 0.011319435 | 0.338262 | 256  | 145  | 203  | 65   | 140  | 46   |
| Pkig      | -0.64024 | 3.773579 | 4.692127 | 0.030301109 | 0.576955 | 213  | 117  | 174  | 64   | 109  | 34   |
| Ccdc137   | -0.63862 | 5.337572 | 9.602643 | 0.001942975 | 0.121526 | 356  | 407  | 364  | 130  | 227  | 108  |
| Ccnd2     | -0.63773 | 7.778711 | 8.977999 | 0.002732498 | 0.152644 | 5587 | 5338 | 5799 | 2560 | 2183 | 1564 |
| Abcg2     | -0.63753 | 5.450239 | 14.12774 | 0.000170806 | 0.024178 | 587  | 311  | 431  | 153  | 257  | 120  |
| Ppp1r9a   | -0.63326 | 5.9254   | 4.0819   | 0.043344898 | 0.686246 | 39   | 49   | 46   | 31   | 11   | 10   |
| Rpusd1    | -0.63187 | 4.168893 | 4.820322 | 0.028126098 | 0.557239 | 166  | 105  | 75   | 42   | 48   | 41   |
| Peg13     | -0.62927 | 6.769945 | 8.008527 | 0.004655759 | 0.209553 | 119  | 165  | 121  | 56   | 72   | 38   |
| C630004H  | -0.62906 | 5.997179 | 5.65046  | 0.01745079  | 0.439849 | 51   | 64   | 87   | 15   | 46   | 24   |
| Inpp5b    | -0.62778 | 3.440159 | 3.860866 | 0.04942481  | 0.722435 | 125  | 96   | 130  | 33   | 104  | 21   |
| Ecsit     | -0.62681 | 4.008974 | 6.85504  | 0.008839156 | 0.296698 | 127  | 137  | 149  | 45   | 96   | 35   |
| Fam82a2   | -0.62031 | 4.980953 | 12.25523 | 0.000463955 | 0.04776  | 479  | 424  | 420  | 142  | 275  | 132  |
| Zmynd19   | -0.6198  | 3.654208 | 5.82942  | 0.015760321 | 0.415865 | 201  | 129  | 193  | 69   | 119  | 33   |
| Hps6      | -0.61763 | 3.439109 | 4.21055  | 0.040173302 | 0.662225 | 177  | 122  | 105  | 60   | 51   | 42   |
| A830010M  | -0.61455 | 4.582073 | 4.184302 | 0.040800004 | 0.667569 | 65   | 89   | 69   | 11   | 57   | 29   |
| Noc4l     | -0.60759 | 3.684036 | 4.807794 | 0.028331293 | 0.559691 | 203  | 199  | 227  | 75   | 142  | 53   |
| 5730494N  | -0.60293 | 4.738683 | 6.725331 | 0.009505309 | 0.308471 | 334  | 186  | 283  | 76   | 224  | 57   |
| Zfp423    | -0.59829 | 4.026582 | 4.107786 | 0.042686217 | 0.684325 | 88   | 50   | 60   | 22   | 38   | 21   |
| Dusp16    | -0.59731 | 4.653386 | 6.566604 | 0.010391003 | 0.323446 | 521  | 434  | 422  | 169  | 286  | 124  |
| A730011LC | -0.59675 | 2.963552 | 4.006464 | 0.045326122 | 0.700601 | 108  | 83   | 88   | 41   | 59   | 18   |
| Scrn3     | -0.59482 | 3.993287 | 3.962968 | 0.04651163  | 0.704916 | 113  | 74   | 96   | 42   | 54   | 21   |
| Kcnb1     | -0.59334 | 6.467244 | 4.518464 | 0.03353092  | 0.607346 | 39   | 32   | 37   | 16   | 18   | 11   |
| Osgin2    | -0.58833 | 3.616141 | 5.030229 | 0.024908611 | 0.526975 | 155  | 161  | 198  | 54   | 131  | 44   |
| Xk        | -0.5872  | 3.633316 | 3.870924 | 0.049129477 | 0.720347 | 109  | 44   | 86   | 26   | 50   | 23   |
| Eid2b     | -0.58306 | 3.582221 | 5.389396 | 0.02025948  | 0.476918 | 119  | 87   | 101  | 38   | 62   | 29   |
| Emb       | -0.58272 | 6.346106 | 3.937432 | 0.0472228   | 0.709034 | 122  | 213  | 336  | 90   | 113  | 76   |
| Ssfa2     | -0.58103 | 4.698749 | 6.047947 | 0.013922478 | 0.382575 | 538  | 332  | 496  | 192  | 273  | 107  |
| Tppp3     | -0.58012 | 10.12613 | 5.907249 | 0.015078701 | 0.403524 | 574  | 464  | 309  | 237  | 204  | 99   |
| Homer1    | -0.57445 | 4.236784 | 5.023349 | 0.025007756 | 0.527    | 230  | 181  | 234  | 89   | 116  | 62   |
| Defb1     | -0.57216 | 6.52184  | 10.76684 | 0.001033348 | 0.079405 | 3187 | 2131 | 2665 | 1110 | 1639 | 634  |

|           |          |          |          |             |          |      |      |      |      |      |      |
|-----------|----------|----------|----------|-------------|----------|------|------|------|------|------|------|
| Alg2      | -0.57014 | 5.183794 | 6.77456  | 0.009246631 | 0.304866 | 162  | 202  | 172  | 70   | 94   | 61   |
| Khdrbs3   | -0.56917 | 5.145744 | 4.9955   | 0.025413317 | 0.529416 | 120  | 115  | 91   | 43   | 44   | 44   |
| Mapk8ip3  | -0.56914 | 6.693105 | 4.247824 | 0.039300645 | 0.655094 | 101  | 81   | 84   | 59   | 27   | 19   |
| Taf7      | -0.56652 | 4.59969  | 5.014081 | 0.025141974 | 0.527777 | 241  | 271  | 219  | 113  | 118  | 71   |
| Csrp2     | -0.56329 | 4.863159 | 6.055193 | 0.013865463 | 0.381984 | 199  | 130  | 230  | 72   | 138  | 38   |
| 1810012P1 | -0.56305 | 4.704699 | 6.8983   | 0.008627775 | 0.293727 | 300  | 283  | 297  | 131  | 170  | 74   |
| Sorcs3    | -0.56219 | 4.225789 | 4.402212 | 0.035892341 | 0.62938  | 300  | 140  | 161  | 60   | 165  | 44   |
| Ubr7      | -0.55169 | 4.30342  | 4.802711 | 0.028414997 | 0.559869 | 439  | 253  | 300  | 127  | 261  | 61   |
| Ptges2    | -0.55138 | 4.687549 | 6.610275 | 0.010139198 | 0.319407 | 297  | 248  | 244  | 83   | 152  | 98   |
| Zfp955b   | -0.54874 | 4.165696 | 4.536423 | 0.033180864 | 0.605326 | 197  | 197  | 183  | 82   | 123  | 48   |
| Ephb1     | -0.54656 | 4.615915 | 4.350217 | 0.037004232 | 0.636946 | 359  | 272  | 392  | 162  | 194  | 80   |
| Osbpl6    | -0.54606 | 6.106046 | 9.501843 | 0.002052657 | 0.125775 | 1104 | 767  | 1107 | 379  | 601  | 292  |
| Smpd2     | -0.54423 | 3.786111 | 4.635711 | 0.031313171 | 0.585856 | 287  | 169  | 248  | 94   | 142  | 64   |
| Slc25a15  | -0.54261 | 3.831516 | 4.075918 | 0.043498615 | 0.68748  | 215  | 223  | 195  | 99   | 148  | 39   |
| 1110038D: | -0.54235 | 3.648119 | 5.18757  | 0.022749005 | 0.504086 | 265  | 160  | 214  | 81   | 157  | 47   |
| Mrto4     | -0.54131 | 4.676521 | 4.170161 | 0.041141888 | 0.670105 | 345  | 353  | 321  | 153  | 201  | 88   |
| BC017647  | -0.52452 | 5.623682 | 9.573375 | 0.001974196 | 0.122765 | 666  | 469  | 558  | 195  | 413  | 155  |
| Arsk      | -0.52444 | 4.354997 | 4.557446 | 0.032775918 | 0.602741 | 478  | 254  | 404  | 160  | 223  | 102  |
| Enpp2     | -0.51926 | 5.904891 | 4.369691 | 0.036583634 | 0.634251 | 66   | 53   | 57   | 20   | 48   | 12   |
| Tmem47    | -0.51819 | 5.85499  | 4.877054 | 0.027216031 | 0.547313 | 131  | 67   | 67   | 37   | 45   | 30   |
| Rilpl1    | -0.51776 | 4.327068 | 5.281062 | 0.02155859  | 0.489635 | 216  | 127  | 146  | 60   | 94   | 55   |
| Cnst      | -0.51711 | 5.716501 | 8.700428 | 0.003181354 | 0.166951 | 372  | 245  | 280  | 100  | 206  | 92   |
| C230091D: | -0.51535 | 4.556994 | 5.896554 | 0.015170538 | 0.405477 | 253  | 211  | 184  | 68   | 185  | 52   |
| Mrpl38    | -0.51095 | 4.763801 | 7.821463 | 0.005162938 | 0.222943 | 310  | 222  | 269  | 78   | 194  | 89   |
| Fam53a    | -0.50725 | 3.962075 | 4.140084 | 0.041879096 | 0.676079 | 363  | 234  | 361  | 105  | 198  | 114  |
| Pfce1     | -0.5031  | 5.474843 | 8.010349 | 0.004651076 | 0.209553 | 875  | 572  | 601  | 305  | 435  | 166  |
| Pth1r     | -0.49952 | 4.727157 | 3.945795 | 0.04698866  | 0.706011 | 155  | 180  | 213  | 71   | 145  | 44   |
| Adcy2     | -0.49754 | 4.181775 | 4.527383 | 0.0333566   | 0.606248 | 127  | 115  | 101  | 45   | 85   | 28   |
| Asb1      | -0.49723 | 4.994026 | 4.44163  | 0.035072746 | 0.624144 | 124  | 107  | 78   | 24   | 86   | 34   |
| Mboat2    | -0.49642 | 5.80684  | 5.511218 | 0.018894881 | 0.457818 | 94   | 80   | 118  | 39   | 65   | 28   |
| 5133401N: | -0.49634 | 5.112013 | 5.528747 | 0.018706497 | 0.454277 | 347  | 314  | 401  | 125  | 267  | 102  |
| Ogfd1     | -0.49413 | 4.719087 | 4.867523 | 0.02736676  | 0.548388 | 367  | 209  | 227  | 86   | 219  | 69   |
| Tom34     | -0.4939  | 6.074018 | 6.871564 | 0.008757796 | 0.295349 | 649  | 414  | 485  | 213  | 335  | 141  |
| Irak2     | -0.49242 | 5.817524 | 5.6681   | 0.017276162 | 0.438869 | 1577 | 1334 | 1569 | 472  | 1137 | 477  |
| Clip2     | -0.49192 | 4.917138 | 4.918952 | 0.026563622 | 0.542261 | 138  | 74   | 134  | 48   | 71   | 34   |
| Llph      | -0.49091 | 4.967913 | 5.168325 | 0.023002381 | 0.506052 | 794  | 467  | 589  | 248  | 417  | 165  |
| Bcl7a     | -0.48812 | 6.093438 | 11.38912 | 0.000738757 | 0.066786 | 1567 | 929  | 1176 | 453  | 894  | 332  |
| Pla2g7    | -0.48752 | 6.477034 | 6.421251 | 0.011276269 | 0.337441 | 236  | 277  | 226  | 118  | 168  | 56   |
| Pdxb      | -0.48752 | 5.392331 | 7.795572 | 0.005237442 | 0.222943 | 393  | 356  | 293  | 132  | 215  | 118  |
| Ddx41     | -0.48738 | 4.448375 | 6.281066 | 0.01220347  | 0.353391 | 496  | 349  | 298  | 149  | 253  | 111  |
| Ccdc101   | -0.48685 | 4.048795 | 4.087991 | 0.043188956 | 0.68529  | 179  | 147  | 119  | 64   | 90   | 44   |
| Mphosph1  | -0.48537 | 5.04674  | 4.821048 | 0.028114244 | 0.557239 | 570  | 447  | 467  | 220  | 359  | 110  |
| Dhx29     | -0.48529 | 4.307655 | 3.969116 | 0.046342084 | 0.704662 | 330  | 290  | 248  | 107  | 201  | 89   |
| BC046331  | -0.48291 | 4.426921 | 5.259935 | 0.021821836 | 0.492158 | 268  | 169  | 169  | 74   | 133  | 64   |
| Abca8a    | -0.48079 | 6.98967  | 4.725051 | 0.029726307 | 0.573757 | 761  | 832  | 918  | 465  | 485  | 182  |
| Cdkal1    | -0.47624 | 4.56705  | 4.552322 | 0.032874136 | 0.603145 | 482  | 393  | 452  | 164  | 339  | 122  |
| Morn2     | -0.47566 | 4.743193 | 4.879986 | 0.027169846 | 0.547313 | 261  | 290  | 280  | 80   | 212  | 100  |
| Dkk3      | -0.47136 | 7.149317 | 13.42746 | 0.000247967 | 0.030791 | 3025 | 2387 | 2623 | 1071 | 1991 | 709  |
| Tsc22d2   | -0.47058 | 4.327561 | 3.898082 | 0.048341253 | 0.718364 | 391  | 273  | 197  | 108  | 156  | 108  |
| Ccdc112   | -0.46794 | 4.414842 | 4.247555 | 0.039306879 | 0.655094 | 190  | 218  | 214  | 74   | 154  | 66   |
| Nrxn1     | -0.46743 | 7.569895 | 12.03119 | 0.000523176 | 0.0514   | 1277 | 916  | 1209 | 457  | 856  | 288  |
| Gsta3     | -0.46653 | 5.651377 | 5.053839 | 0.024571435 | 0.525004 | 1622 | 1192 | 1362 | 651  | 860  | 369  |
| Gnl3      | -0.46566 | 5.293803 | 4.967224 | 0.025832068 | 0.534426 | 520  | 476  | 502  | 264  | 276  | 128  |
| Sox9      | -0.46496 | 6.356966 | 7.649412 | 0.005679082 | 0.232745 | 1874 | 1123 | 1817 | 593  | 1299 | 408  |
| Crabp1    | -0.46306 | 4.290561 | 4.05892  | 0.043938582 | 0.690382 | 525  | 339  | 420  | 153  | 258  | 157  |
| Mfge8     | -0.45943 | 6.743611 | 7.20433  | 0.007272789 | 0.266578 | 2625 | 2232 | 2026 | 919  | 1405 | 771  |
| Ift88     | -0.45822 | 4.291409 | 4.088893 | 0.043165912 | 0.68529  | 256  | 216  | 262  | 101  | 173  | 69   |
| Stox2     | -0.45694 | 6.075462 | 6.711934 | 0.009576979 | 0.309862 | 355  | 267  | 232  | 98   | 249  | 68   |
| Ap1ar     | -0.45472 | 5.125992 | 6.644977 | 0.009943575 | 0.31577  | 635  | 456  | 540  | 227  | 311  | 186  |
| Npr3      | -0.45228 | 5.0206   | 6.607347 | 0.010155883 | 0.319465 | 959  | 736  | 668  | 320  | 488  | 259  |
| Kitl      | -0.45108 | 5.725235 | 6.960351 | 0.008333566 | 0.287118 | 390  | 230  | 238  | 111  | 205  | 81   |
| Ric8b     | -0.44584 | 4.726257 | 4.297402 | 0.038170644 | 0.646168 | 178  | 112  | 122  | 61   | 87   | 40   |
| Nvl       | -0.44431 | 4.87248  | 5.481584 | 0.019217834 | 0.460971 | 589  | 408  | 452  | 211  | 333  | 130  |
| Coq7      | -0.44414 | 5.813339 | 7.363293 | 0.006656876 | 0.254404 | 555  | 470  | 442  | 219  | 289  | 157  |
| Timp3     | -0.44398 | 8.83514  | 11.31496 | 0.000768852 | 0.068441 | 4325 | 3554 | 3423 | 1655 | 2204 | 1222 |

|           |          |          |          |             |          |      |      |      |      |      |      |
|-----------|----------|----------|----------|-------------|----------|------|------|------|------|------|------|
| Pwp1      | -0.44081 | 4.521382 | 4.426017 | 0.035395012 | 0.625721 | 370  | 374  | 347  | 152  | 246  | 114  |
| 1700021FC | -0.4406  | 4.793548 | 5.124011 | 0.02359702  | 0.515307 | 342  | 261  | 311  | 132  | 211  | 85   |
| Gtf2f2    | -0.43704 | 4.864771 | 4.003859 | 0.045396204 | 0.70068  | 722  | 515  | 521  | 215  | 410  | 194  |
| Trim37    | -0.43624 | 7.530167 | 13.89995 | 0.000192804 | 0.025927 | 1449 | 996  | 1224 | 488  | 822  | 389  |
| Arrdc4    | -0.43447 | 4.9982   | 4.597201 | 0.032024197 | 0.593482 | 911  | 646  | 671  | 326  | 570  | 176  |
| Tex2      | -0.43121 | 5.89795  | 7.038467 | 0.007977729 | 0.280931 | 767  | 391  | 579  | 207  | 460  | 163  |
| Mapre3    | -0.43107 | 7.01317  | 6.704215 | 0.009618527 | 0.310273 | 206  | 233  | 232  | 74   | 185  | 70   |
| Cdo1      | -0.42838 | 8.322471 | 4.216601 | 0.040030283 | 0.662225 | 8977 | 8117 | 8485 | 4315 | 6098 | 1905 |
| Gfod1     | -0.42833 | 5.897391 | 6.6977   | 0.009653739 | 0.310478 | 354  | 359  | 342  | 154  | 235  | 109  |
| Iffo2     | -0.42791 | 5.581312 | 4.666885 | 0.030749659 | 0.580838 | 1537 | 1070 | 806  | 519  | 723  | 325  |
| Rbms3     | -0.42697 | 8.757206 | 5.387157 | 0.020285495 | 0.477008 | 553  | 584  | 605  | 290  | 297  | 196  |
| Mpi       | -0.42677 | 4.978704 | 4.058517 | 0.043949089 | 0.690382 | 270  | 189  | 206  | 56   | 166  | 92   |
| Cryab     | -0.42655 | 8.098118 | 5.74499  | 0.016535747 | 0.425578 | 2702 | 1768 | 2268 | 1192 | 1334 | 547  |
| Polr3g    | -0.42532 | 6.392551 | 7.392692 | 0.006548942 | 0.251852 | 1195 | 806  | 1034 | 492  | 629  | 276  |
| Got1      | -0.42521 | 6.383215 | 4.307722 | 0.037939724 | 0.644349 | 204  | 94   | 169  | 48   | 134  | 44   |
| Rai14     | -0.42461 | 4.448503 | 4.054079 | 0.044064747 | 0.691344 | 527  | 279  | 424  | 145  | 261  | 153  |
| Pcsk2     | -0.42414 | 7.113682 | 4.69493  | 0.03025173  | 0.576787 | 410  | 292  | 413  | 195  | 182  | 117  |
| Lamb1     | -0.42398 | 7.25249  | 9.356086 | 0.002222462 | 0.132461 | 2549 | 2362 | 2124 | 964  | 1708 | 707  |
| Tanc2     | -0.42284 | 5.676926 | 4.363636 | 0.036713863 | 0.634486 | 335  | 254  | 364  | 161  | 217  | 74   |
| Ints4     | -0.42194 | 4.913049 | 6.299306 | 0.012078526 | 0.350717 | 472  | 342  | 461  | 167  | 302  | 135  |
| Gprc5c    | -0.41991 | 5.502815 | 3.970391 | 0.046307009 | 0.704626 | 178  | 142  | 200  | 94   | 114  | 38   |
| Lmbrd2    | -0.41689 | 6.342418 | 9.271222 | 0.002327824 | 0.135357 | 761  | 669  | 623  | 267  | 479  | 230  |
| Dkc1      | -0.41611 | 6.947305 | 8.531982 | 0.003489595 | 0.176394 | 2532 | 1879 | 1923 | 982  | 1355 | 612  |
| Mbd3      | -0.4144  | 5.203956 | 5.606598 | 0.017892967 | 0.446595 | 590  | 436  | 461  | 203  | 406  | 124  |
| Dnajc11   | -0.41264 | 5.62893  | 6.009839 | 0.014226322 | 0.387951 | 833  | 743  | 767  | 241  | 562  | 314  |
| Trappc4   | -0.41247 | 6.535409 | 11.15346 | 0.000838752 | 0.07133  | 956  | 737  | 881  | 344  | 589  | 285  |
| Pcnp      | -0.41226 | 5.191309 | 4.354319 | 0.036915216 | 0.63679  | 408  | 318  | 269  | 106  | 264  | 114  |
| Gnl1      | -0.41176 | 5.967111 | 7.878835 | 0.00500167  | 0.218288 | 714  | 698  | 632  | 290  | 507  | 198  |
| Tceal8    | -0.41102 | 5.35472  | 4.746821 | 0.029352479 | 0.570504 | 548  | 362  | 593  | 205  | 322  | 172  |
| Socs5     | -0.40776 | 5.451421 | 4.090433 | 0.043126605 | 0.68529  | 242  | 203  | 220  | 102  | 111  | 87   |
| Al316807  | -0.40733 | 5.756797 | 8.229025 | 0.004122566 | 0.195377 | 1017 | 691  | 757  | 288  | 620  | 277  |
| Elavl1    | -0.40648 | 5.130523 | 4.187639 | 0.040719779 | 0.666763 | 747  | 432  | 540  | 259  | 411  | 149  |
| Bcas1     | -0.4052  | 7.200087 | 5.45118  | 0.019555109 | 0.466714 | 1278 | 892  | 918  | 502  | 652  | 287  |
| Bok       | -0.4033  | 5.37386  | 4.012825 | 0.045155425 | 0.700601 | 1132 | 948  | 833  | 414  | 781  | 253  |
| Atp6v0e2  | -0.40088 | 7.426143 | 5.80566  | 0.015974667 | 0.416022 | 244  | 297  | 275  | 99   | 217  | 90   |
| Mrpl41    | -0.39866 | 5.605653 | 5.061747 | 0.02445957  | 0.523133 | 440  | 317  | 357  | 159  | 256  | 116  |
| Gkap1     | -0.39836 | 5.898197 | 4.912402 | 0.026664543 | 0.542916 | 308  | 269  | 230  | 85   | 192  | 110  |
| Krt78     | -0.39816 | 5.368667 | 4.519423 | 0.033512132 | 0.607346 | 1283 | 972  | 1130 | 531  | 652  | 373  |
| Ptpn3     | -0.39691 | 4.911204 | 4.794252 | 0.028554855 | 0.561083 | 426  | 349  | 396  | 160  | 238  | 148  |
| Aif1l     | -0.39673 | 7.50744  | 6.482882 | 0.010891823 | 0.332409 | 4626 | 3219 | 3867 | 1767 | 2560 | 1191 |
| Tmem64    | -0.39631 | 5.564681 | 7.060372 | 0.007880762 | 0.279927 | 739  | 534  | 653  | 289  | 457  | 182  |
| Oxr1      | -0.39605 | 8.358467 | 9.647032 | 0.001896578 | 0.12002  | 7615 | 6181 | 6460 | 2932 | 4673 | 2105 |
| Nceh1     | -0.3958  | 5.858417 | 4.097824 | 0.042938438 | 0.684851 | 139  | 91   | 85   | 41   | 68   | 40   |
| Bcl2      | -0.39396 | 6.522888 | 9.449217 | 0.002112393 | 0.128029 | 1182 | 825  | 1021 | 388  | 835  | 285  |
| Plcd3     | -0.39374 | 4.037495 | 3.847053 | 0.049833492 | 0.725696 | 406  | 337  | 325  | 134  | 272  | 117  |
| Tusc2     | -0.39256 | 6.400867 | 7.228721 | 0.007174632 | 0.265002 | 560  | 443  | 431  | 182  | 313  | 183  |
| Guk1      | -0.389   | 6.733651 | 4.983715 | 0.025586976 | 0.531391 | 634  | 592  | 672  | 287  | 492  | 168  |
| Opa3      | -0.38831 | 5.694709 | 4.422054 | 0.035477304 | 0.625721 | 487  | 522  | 495  | 236  | 391  | 128  |
| Prkag2    | -0.38793 | 6.488367 | 4.867097 | 0.027373513 | 0.548388 | 609  | 427  | 619  | 194  | 381  | 214  |
| Orc2      | -0.38767 | 5.191826 | 5.808928 | 0.01594501  | 0.416022 | 617  | 580  | 538  | 243  | 417  | 187  |
| Rhoj      | -0.38636 | 6.140535 | 8.222904 | 0.004136495 | 0.195606 | 1353 | 1010 | 985  | 428  | 759  | 407  |
| Ppip5k2   | -0.38573 | 6.313646 | 6.862023 | 0.008804683 | 0.296002 | 661  | 528  | 561  | 278  | 373  | 181  |
| Fbxo25    | -0.38315 | 5.194657 | 4.278596 | 0.038595225 | 0.648255 | 326  | 274  | 245  | 111  | 226  | 84   |
| Ppa1      | -0.38069 | 6.851918 | 8.124662 | 0.004366712 | 0.201618 | 2269 | 1675 | 1711 | 822  | 1247 | 623  |
| Utp20     | -0.3805  | 4.547423 | 3.888983 | 0.048603858 | 0.719107 | 489  | 408  | 344  | 168  | 308  | 133  |
| Dnaja1    | -0.38033 | 7.200164 | 6.565749 | 0.010395996 | 0.323446 | 641  | 405  | 588  | 214  | 347  | 208  |
| Col8a1    | -0.37985 | 7.010475 | 7.838179 | 0.005115413 | 0.221455 | 3539 | 2471 | 3609 | 1236 | 2302 | 1118 |
| Arrdc3    | -0.37553 | 5.68333  | 4.092471 | 0.043074637 | 0.68529  | 1340 | 833  | 1056 | 472  | 761  | 326  |
| Gfra1     | -0.37155 | 6.173338 | 4.323986 | 0.037578797 | 0.642723 | 475  | 423  | 448  | 234  | 322  | 110  |
| Gstm1     | -0.3689  | 5.816045 | 6.963173 | 0.008320435 | 0.287118 | 972  | 723  | 696  | 298  | 641  | 257  |
| Mul1      | -0.36776 | 5.2536   | 5.032488 | 0.024876131 | 0.526975 | 465  | 361  | 365  | 153  | 266  | 154  |
| Acsm1     | -0.36729 | 5.606395 | 4.248034 | 0.039295801 | 0.655094 | 1544 | 1236 | 1174 | 595  | 917  | 414  |
| Eps15l1   | -0.36688 | 5.702256 | 4.611423 | 0.031759676 | 0.591126 | 1062 | 689  | 967  | 349  | 626  | 333  |
| Drosha    | -0.36679 | 6.254033 | 7.148696 | 0.007501853 | 0.272652 | 952  | 859  | 752  | 363  | 629  | 277  |
| Nf1       | -0.36572 | 5.588376 | 4.008978 | 0.045258578 | 0.700601 | 485  | 442  | 384  | 152  | 320  | 173  |

|           |          |          |          |             |          |      |      |      |      |      |      |
|-----------|----------|----------|----------|-------------|----------|------|------|------|------|------|------|
| Epas1     | -0.36373 | 7.467466 | 5.751219 | 0.016477217 | 0.424579 | 4153 | 3611 | 3720 | 1881 | 2944 | 971  |
| Nrxn2     | -0.36257 | 8.157801 | 5.001985 | 0.025318271 | 0.528881 | 290  | 260  | 208  | 117  | 154  | 93   |
| Cyp3a13   | -0.36254 | 5.417346 | 4.462028 | 0.034656328 | 0.618296 | 1199 | 1010 | 1188 | 434  | 926  | 366  |
| Wdr37     | -0.36155 | 5.226326 | 4.306216 | 0.037973347 | 0.644349 | 329  | 208  | 251  | 106  | 214  | 75   |
| Enc1      | -0.35599 | 5.795773 | 4.47448  | 0.034404661 | 0.616362 | 1072 | 750  | 781  | 344  | 587  | 324  |
| C80913    | -0.35213 | 6.247666 | 5.585976 | 0.01810484  | 0.447237 | 1404 | 1087 | 1300 | 517  | 880  | 458  |
| S100a13   | -0.34921 | 6.458975 | 3.98639  | 0.045869246 | 0.703111 | 344  | 327  | 338  | 104  | 280  | 132  |
| Igfbp4    | -0.3492  | 7.396413 | 9.765906 | 0.001777779 | 0.115213 | 2482 | 1745 | 1936 | 851  | 1570 | 659  |
| Tsc22d1   | -0.34849 | 7.820361 | 6.225588 | 0.012591707 | 0.359026 | 2557 | 1751 | 1792 | 792  | 1708 | 619  |
| Aldh1a1   | -0.34789 | 5.593699 | 4.229773 | 0.03972076  | 0.658422 | 1247 | 883  | 1124 | 454  | 705  | 407  |
| Ube2n     | -0.34573 | 5.5057   | 3.926243 | 0.047538032 | 0.711178 | 268  | 191  | 204  | 84   | 161  | 83   |
| Pard3b    | -0.3417  | 5.478044 | 4.137278 | 0.041948572 | 0.676079 | 957  | 749  | 764  | 335  | 569  | 308  |
| Gtpbp4    | -0.33896 | 6.754136 | 3.900608 | 0.048268637 | 0.718364 | 1953 | 1692 | 1596 | 962  | 1129 | 483  |
| Xpc       | -0.33654 | 5.535071 | 5.010651 | 0.02519183  | 0.527777 | 1020 | 779  | 913  | 386  | 657  | 310  |
| N6amt1    | -0.33625 | 6.105209 | 5.353331 | 0.020682726 | 0.481091 | 646  | 467  | 568  | 248  | 425  | 174  |
| Phyhip    | -0.33607 | 6.255025 | 5.032628 | 0.024874123 | 0.526975 | 2106 | 1902 | 1812 | 730  | 1416 | 762  |
| Usp46     | -0.33313 | 5.831508 | 4.927581 | 0.026431298 | 0.541055 | 1218 | 814  | 908  | 435  | 722  | 311  |
| Ftsj3     | -0.33169 | 6.118092 | 5.203822 | 0.022537286 | 0.50146  | 1194 | 1130 | 910  | 483  | 839  | 336  |
| Ciapi1    | -0.33115 | 7.054633 | 6.762441 | 0.009309632 | 0.304924 | 1779 | 1010 | 1395 | 527  | 1026 | 517  |
| D5Ertd579 | -0.32843 | 6.279464 | 4.816466 | 0.028189082 | 0.557973 | 1033 | 826  | 962  | 436  | 704  | 290  |
| Lancl1    | -0.32699 | 6.793614 | 5.271884 | 0.021672546 | 0.489818 | 1632 | 1523 | 1621 | 668  | 1041 | 639  |
| Polb      | -0.3245  | 6.347949 | 4.663901 | 0.030803136 | 0.580859 | 1806 | 1264 | 1263 | 609  | 1075 | 492  |
| Ivns1abp  | -0.31838 | 7.464698 | 6.958916 | 0.008340255 | 0.287118 | 2917 | 2507 | 2841 | 1197 | 2240 | 867  |
| Cpt1a     | -0.31472 | 6.556703 | 5.336816 | 0.020879573 | 0.48254  | 1214 | 1071 | 1048 | 405  | 977  | 383  |
| Ddah1     | -0.31432 | 6.777014 | 4.383344 | 0.036291725 | 0.631987 | 2014 | 1544 | 1386 | 707  | 1259 | 555  |
| Ngfrap1   | -0.31295 | 6.142655 | 4.198856 | 0.040451254 | 0.665642 | 404  | 295  | 310  | 147  | 255  | 112  |
| Sipa1l1   | -0.31098 | 6.512046 | 6.621671 | 0.010074528 | 0.318317 | 1335 | 1090 | 1167 | 465  | 932  | 447  |
| Ttc35     | -0.3081  | 6.976146 | 5.206308 | 0.02250507  | 0.501262 | 1104 | 829  | 863  | 455  | 708  | 272  |
| Cacybp    | -0.30777 | 6.810982 | 4.490862 | 0.03407649  | 0.613035 | 1127 | 930  | 977  | 509  | 760  | 292  |
| Hdac2     | -0.30636 | 6.410725 | 3.919302 | 0.047734682 | 0.713236 | 984  | 760  | 739  | 359  | 551  | 322  |
| Mllt6     | -0.30548 | 5.596145 | 4.042323 | 0.044372712 | 0.69384  | 717  | 506  | 521  | 244  | 430  | 210  |
| Gtf3c6    | -0.30045 | 6.085371 | 3.90283  | 0.04820483  | 0.718364 | 1308 | 1107 | 1121 | 489  | 1010 | 379  |
| Zbtb22    | -0.29547 | 5.682917 | 4.67087  | 0.030678377 | 0.580542 | 854  | 655  | 769  | 329  | 567  | 273  |
| Msh2      | -0.29456 | 6.594596 | 5.843424 | 0.015635374 | 0.413789 | 1946 | 1473 | 1424 | 687  | 1302 | 539  |
| Usp5      | -0.2912  | 6.607972 | 4.583172 | 0.032287385 | 0.596817 | 749  | 627  | 809  | 281  | 577  | 282  |
| BC003331  | -0.29071 | 6.153512 | 4.158387 | 0.041428846 | 0.672742 | 630  | 521  | 492  | 256  | 401  | 188  |
| D19Bwg13  | -0.2882  | 6.683538 | 4.591794 | 0.032125377 | 0.594333 | 1456 | 1220 | 1172 | 604  | 1072 | 373  |
| 2610101N: | -0.28607 | 7.201223 | 5.196073 | 0.022637972 | 0.502143 | 2357 | 2098 | 2210 | 1063 | 1610 | 765  |
| Pla2g16   | -0.28593 | 7.913111 | 5.416287 | 0.019949738 | 0.47221  | 3959 | 2384 | 3175 | 1496 | 2391 | 1003 |
| Mapre2    | -0.28437 | 7.696151 | 5.085393 | 0.024128211 | 0.51857  | 1349 | 1043 | 1234 | 558  | 970  | 381  |
| Kctd2     | -0.28122 | 7.185638 | 4.209575 | 0.040196413 | 0.662225 | 1355 | 1119 | 1205 | 609  | 860  | 417  |
| Tacc1     | -0.28063 | 8.041243 | 5.393687 | 0.020209729 | 0.476268 | 3158 | 2239 | 2520 | 1260 | 1874 | 906  |
| Sod1      | -0.27598 | 8.904832 | 4.826335 | 0.028028159 | 0.556323 | 3951 | 3017 | 3600 | 1377 | 2955 | 1290 |
| Mphosph6  | -0.27547 | 6.714327 | 4.211067 | 0.040161064 | 0.662225 | 2255 | 1841 | 1788 | 903  | 1523 | 662  |
| 2410015M  | -0.27389 | 6.195448 | 4.292451 | 0.038281939 | 0.646227 | 1440 | 1150 | 1285 | 571  | 1087 | 417  |
| Pgrmc1    | -0.27038 | 5.745484 | 3.921251 | 0.047679374 | 0.712904 | 955  | 661  | 750  | 341  | 685  | 245  |
| Rpl7l1    | -0.26981 | 5.982822 | 3.993138 | 0.045685897 | 0.703111 | 1154 | 955  | 1043 | 447  | 813  | 395  |
| Zdhhc21   | -0.26353 | 7.063315 | 4.537709 | 0.033155944 | 0.605326 | 1735 | 1319 | 1266 | 665  | 1080 | 510  |
| B230208H: | -0.26229 | 7.723628 | 5.026087 | 0.024968255 | 0.527    | 2556 | 1978 | 2037 | 993  | 1589 | 823  |
| Scpep1    | -0.25654 | 6.343342 | 4.403982 | 0.035855109 | 0.62938  | 1657 | 1192 | 1399 | 596  | 1039 | 570  |
| Hnrnp1    | -0.2564  | 6.914024 | 3.859522 | 0.049464422 | 0.722523 | 2247 | 1938 | 1833 | 958  | 1562 | 681  |
| Tmem30a   | -0.2516  | 7.796615 | 4.058132 | 0.043959096 | 0.690382 | 1708 | 1187 | 1417 | 621  | 1256 | 468  |
| Nsun2     | -0.24167 | 6.738376 | 3.892608 | 0.048499052 | 0.719107 | 1645 | 1425 | 1329 | 591  | 1182 | 591  |
| Syne1     | -0.23231 | 7.19369  | 3.985825 | 0.045884622 | 0.703111 | 2548 | 2042 | 2136 | 964  | 1778 | 873  |
| Napa      | -0.23211 | 7.138979 | 3.960908 | 0.046568575 | 0.705116 | 1115 | 845  | 946  | 392  | 867  | 346  |
| Dynll2    | -0.22054 | 10.00512 | 4.196954 | 0.04049665  | 0.665642 | 7362 | 5745 | 5668 | 2566 | 5259 | 2448 |

**Table S4. Differentially expressed genes in the TG of miR-183C SNS-CKO vs age- and sex-matched WT control mice.**

| Gene                     | log2FC   | logCPM   | LR       | PValue      | FDR         | WT1 | WT2 | WT3 | WT4 | SNS-CKO1 | SNS-CKO2 | SNS-CKO3 |
|--------------------------|----------|----------|----------|-------------|-------------|-----|-----|-----|-----|----------|----------|----------|
| <b>Upregulated genes</b> |          |          |          |             |             |     |     |     |     |          |          |          |
| Pdzd3                    | 5.484182 | -0.30227 | 8.793805 | 0.003022551 | 1           | 0   | 0   | 0   | 0   | 12       | 1        | 2        |
| Fam166a                  | 5.105066 | -0.46727 | 7.702653 | 0.005513972 | 1           | 0   | 0   | 0   | 0   | 1        | 8        | 3        |
| Gm34321                  | 5.084223 | -0.66844 | 5.702995 | 0.01693599  | 1           | 0   | 0   | 0   | 0   | 2        | 8        | 2        |
| Gm34061                  | 5.067769 | -0.15628 | 7.998668 | 0.004681177 | 1           | 0   | 0   | 0   | 0   | 5        | 7        | 0        |
| Gm35315                  | 5.046036 | -0.05644 | 12.15128 | 0.000490543 | 0.720657938 | 0   | 0   | 0   | 0   | 3        | 4        | 4        |
| LOC102631                | 5.026891 | -0.35503 | 6.130043 | 0.013290367 | 1           | 0   | 0   | 0   | 0   | 0        | 11       | 1        |
| Gm6607                   | 5.017329 | -0.04648 | 13.51026 | 0.000237263 | 0.586926344 | 0   | 0   | 0   | 0   | 0        | 7        | 4        |
| Slc25a21                 | 4.989061 | -0.37304 | 7.885905 | 0.004982154 | 1           | 0   | 0   | 0   | 0   | 3        | 6        | 2        |
| Mirc35hg                 | 4.975647 | 2.78916  | 77.6301  | 1.24262E-18 | 4.47045E-14 | 7   | 1   | 2   | 12  | 176      | 202      | 157      |
| Gm29834                  | 4.76388  | -0.05256 | 6.874995 | 0.008740998 | 1           | 0   | 0   | 0   | 0   | 0        | 0        | 8        |
| Alk                      | 4.763251 | 0.997144 | 12.31975 | 0.00044819  | 0.705016671 | 0   | 0   | 0   | 0   | 1        | 4        | 4        |
| Gm36273                  | 4.752964 | -0.42495 | 6.966731 | 0.008303905 | 1           | 0   | 0   | 0   | 0   | 2        | 4        | 3        |
| Gm31637                  | 4.672055 | -0.79434 | 6.246886 | 0.012441182 | 1           | 0   | 0   | 0   | 0   | 4        | 5        | 0        |
| Gm14167                  | 4.647216 | -0.62137 | 4.37672  | 0.036433039 | 1           | 0   | 0   | 0   | 0   | 3        | 6        | 0        |
| D830044I1                | 4.632217 | 0.07486  | 7.453979 | 0.006329639 | 1           | 0   | 0   | 0   | 0   | 6        | 0        | 2        |
| Gm29938                  | 4.626876 | -0.58117 | 4.443212 | 0.035040265 | 1           | 0   | 0   | 0   | 0   | 3        | 2        | 3        |
| Msx2                     | 4.555904 | -0.02403 | 9.749721 | 0.0017935   | 1           | 0   | 0   | 0   | 0   | 5        | 3        | 0        |
| Gm30701                  | 4.537694 | -0.84863 | 4.944719 | 0.026170485 | 1           | 0   | 0   | 0   | 0   | 2        | 0        | 5        |
| 1700113A                 | 4.520951 | 0.022096 | 7.454506 | 0.006327783 | 1           | 0   | 0   | 0   | 0   | 0        | 1        | 6        |
| Gm16252                  | 4.498645 | -0.54426 | 5.026307 | 0.024965081 | 1           | 0   | 0   | 0   | 0   | 0        | 2        | 5        |
| Gm13630                  | 4.484286 | -0.75777 | 6.058468 | 0.013839766 | 1           | 0   | 0   | 0   | 0   | 2        | 6        | 0        |
| Gm34669                  | 4.480871 | -0.77568 | 5.572848 | 0.018241073 | 1           | 0   | 0   | 0   | 0   | 2        | 6        | 0        |
| Gm30732                  | 4.46008  | -0.38192 | 4.341127 | 0.037202286 | 1           | 0   | 0   | 0   | 0   | 5        | 0        | 2        |
| Gm42357                  | 4.431751 | -0.48833 | 9.296978 | 0.002295321 | 1           | 0   | 0   | 0   | 0   | 0        | 3        | 4        |
| Gm33800                  | 4.382871 | -0.68929 | 3.873374 | 0.049057799 | 1           | 0   | 0   | 0   | 0   | 6        | 1        | 0        |
| Esr2                     | 4.364763 | -0.11236 | 8.281421 | 0.004005277 | 1           | 0   | 0   | 0   | 0   | 4        | 3        | 0        |
| 4930484H                 | 4.349855 | -0.7039  | 3.902243 | 0.04822168  | 1           | 0   | 0   | 0   | 0   | 1        | 0        | 5        |
| Gm31336                  | 4.34646  | -0.86763 | 4.320321 | 0.037659814 | 1           | 0   | 0   | 0   | 0   | 1        | 0        | 5        |
| Gm33464                  | 4.345743 | -0.86944 | 7.312267 | 0.006848548 | 1           | 0   | 0   | 0   | 0   | 1        | 5        | 1        |
| Snord8                   | 4.34037  | -0.51605 | 4.020664 | 0.044946009 | 1           | 0   | 0   | 0   | 0   | 4        | 3        | 0        |
| LOC102631                | 4.307981 | -0.63932 | 5.580831 | 0.018158109 | 1           | 0   | 0   | 0   | 0   | 2        | 5        | 0        |
| Gm30409                  | 4.296802 | -0.73801 | 4.015808 | 0.045075619 | 1           | 0   | 0   | 0   | 0   | 2        | 5        | 0        |
| Ccdc36                   | 4.29655  | -0.63638 | 6.334324 | 0.011842322 | 1           | 0   | 0   | 0   | 0   | 1        | 6        | 0        |
| Gm40302                  | 4.295396 | -0.70491 | 6.495954 | 0.010812028 | 1           | 0   | 0   | 0   | 0   | 2        | 0        | 4        |
| LOC10816                 | 4.288701 | 3.787921 | 20.33077 | 6.51445E-06 | 0.035299197 | 0   | 1   | 0   | 0   | 9        | 7        | 5        |
| Gm39937                  | 4.268488 | -0.37173 | 5.562439 | 0.018349836 | 1           | 0   | 0   | 0   | 0   | 0        | 7        | 0        |
| D830026I1                | 4.239594 | -0.11479 | 7.679269 | 0.005585879 | 1           | 0   | 0   | 0   | 0   | 2        | 1        | 3        |
| Tmem253                  | 4.224081 | -0.4414  | 4.881423 | 0.027147227 | 1           | 0   | 0   | 0   | 0   | 5        | 0        | 1        |
| Klk11                    | 4.205336 | 3.409408 | 9.797292 | 0.001747691 | 1           | 0   | 0   | 0   | 0   | 0        | 2        | 4        |
| Lpar2                    | 4.196506 | 2.846724 | 9.707706 | 0.001834969 | 1           | 0   | 0   | 0   | 0   | 6        | 0        | 0        |
| Gm40652                  | 4.175152 | -0.61884 | 5.849578 | 0.015580785 | 1           | 0   | 0   | 0   | 0   | 5        | 1        | 0        |
| Gm11627                  | 4.169372 | -0.267   | 6.179538 | 0.0129236   | 1           | 0   | 0   | 0   | 1   | 16       | 4        | 0        |
| Gm35198                  | 4.164626 | -0.86939 | 4.874039 | 0.027263613 | 1           | 0   | 0   | 0   | 0   | 0        | 4        | 2        |
| Morf4l1-ps               | 4.152932 | 1.237727 | 16.31236 | 5.37123E-05 | 0.214706137 | 0   | 0   | 0   | 1   | 5        | 7        | 7        |
| Gm41694                  | 4.119871 | -0.42605 | 4.162    | 0.041340568 | 1           | 0   | 0   | 0   | 0   | 0        | 0        | 5        |
| Gm34299                  | 4.114654 | -0.6216  | 4.513222 | 0.03363382  | 1           | 0   | 0   | 0   | 0   | 0        | 0        | 5        |
| Alx3                     | 4.107202 | -0.84973 | 4.169502 | 0.041157907 | 1           | 0   | 0   | 0   | 0   | 0        | 5        | 1        |
| A330076C1                | 4.104094 | -0.86935 | 4.793748 | 0.028563206 | 1           | 0   | 0   | 0   | 0   | 2        | 4        | 0        |
| Gm34180                  | 4.098434 | -0.7246  | 4.108864 | 0.042659009 | 1           | 0   | 0   | 0   | 0   | 2        | 4        | 0        |
| LOC10816                 | 4.09419  | 0.183286 | 5.803682 | 0.015992648 | 1           | 0   | 0   | 0   | 0   | 1        | 5        | 0        |
| Gm34050                  | 4.083373 | -0.68995 | 4.966738 | 0.025839342 | 1           | 0   | 0   | 0   | 0   | 1        | 5        | 0        |
| Gm40768                  | 4.080365 | -0.43687 | 4.703569 | 0.030100049 | 1           | 0   | 0   | 0   | 0   | 1        | 5        | 0        |
| Raet1e                   | 4.066448 | -0.05163 | 5.324173 | 0.021031584 | 1           | 0   | 0   | 0   | 0   | 0        | 6        | 0        |
| Gm32934                  | 4.054173 | -0.62704 | 4.460853 | 0.034680171 | 1           | 0   | 0   | 0   | 0   | 0        | 6        | 0        |
| C630031E                 | 4.050633 | -0.75641 | 4.247166 | 0.039315887 | 1           | 0   | 0   | 0   | 0   | 2        | 0        | 3        |
| Recql4                   | 4.05005  | -0.49546 | 4.308568 | 0.03792087  | 1           | 0   | 0   | 0   | 0   | 2        | 0        | 3        |
| Gm32672                  | 4.048377 | -0.88775 | 4.478348 | 0.034326893 | 1           | 0   | 0   | 0   | 0   | 2        | 0        | 3        |
| Myo18b                   | 4.04801  | -0.55463 | 4.514288 | 0.033612883 | 1           | 0   | 0   | 0   | 0   | 2        | 0        | 3        |
| Ces1a                    | 4.044787 | -0.72058 | 4.81297  | 0.02824633  | 1           | 0   | 0   | 0   | 0   | 2        | 0        | 3        |
| Gm19424                  | 3.986429 | -0.68749 | 5.925926 | 0.014919695 | 1           | 0   | 0   | 0   | 0   | 0        | 2        | 3        |



|          |          |          |          |             |   |   |   |   |   |   |    |    |
|----------|----------|----------|----------|-------------|---|---|---|---|---|---|----|----|
| Myog     | 3.959493 | -0.81249 | 6.089242 | 0.013600743 | 1 | 0 | 0 | 0 | 0 | 1 | 2  | 2  |
| Hapln3   | 3.95454  | 0.010572 | 6.050038 | 0.013905998 | 1 | 0 | 0 | 0 | 0 | 3 | 1  | 1  |
| Stx19    | 3.952392 | 2.474292 | 8.256186 | 0.004061337 | 1 | 0 | 0 | 0 | 0 | 2 | 1  | 2  |
| Gm40338  | 3.950519 | -0.31209 | 8.531515 | 0.00349049  | 1 | 0 | 1 | 0 | 0 | 6 | 9  | 2  |
| Gm41377  | 3.947613 | -0.32454 | 4.51073  | 0.033682865 | 1 | 0 | 0 | 0 | 0 | 5 | 0  | 0  |
| Gm35596  | 3.938481 | 0.342563 | 7.327604 | 0.006790352 | 1 | 0 | 0 | 0 | 0 | 4 | 1  | 0  |
| Gm34319  | 3.931691 | -0.79438 | 5.034855 | 0.02484217  | 1 | 0 | 0 | 0 | 0 | 2 | 2  | 1  |
| Vwa2     | 3.926627 | -0.54089 | 5.43603  | 0.019725453 | 1 | 0 | 0 | 0 | 0 | 4 | 1  | 0  |
| Tmem139  | 3.924264 | 2.492157 | 7.987508 | 0.004710119 | 1 | 0 | 0 | 0 | 0 | 0 | 5  | 0  |
| Gm42009  | 3.904925 | -0.68833 | 4.495522 | 0.03398373  | 1 | 0 | 0 | 0 | 0 | 1 | 3  | 1  |
| Gm30325  | 3.881204 | -0.77683 | 4.680001 | 0.030515728 | 1 | 0 | 0 | 0 | 0 | 0 | 4  | 1  |
| Gm40446  | 3.880435 | -0.85013 | 4.596105 | 0.032044675 | 1 | 0 | 0 | 0 | 0 | 0 | 4  | 1  |
| BB557941 | 3.867142 | -0.81265 | 4.059694 | 0.043918466 | 1 | 0 | 0 | 0 | 0 | 2 | 3  | 0  |
| Gm32133  | 3.865338 | -0.72268 | 3.867324 | 0.049234973 | 1 | 0 | 0 | 0 | 0 | 2 | 3  | 0  |
| Gm40842  | 3.854154 | 0.411353 | 5.955111 | 0.014674679 | 1 | 0 | 0 | 0 | 0 | 0 | 5  | 0  |
| Cpa6     | 3.839011 | -0.68843 | 3.954793 | 0.046738055 | 1 | 0 | 0 | 0 | 0 | 1 | 4  | 0  |
| LOC10524 | 3.806537 | -0.49969 | 3.961662 | 0.046547711 | 1 | 0 | 0 | 0 | 0 | 0 | 0  | 4  |
| Gm33234  | 3.791076 | -0.65052 | 4.561173 | 0.032704662 | 1 | 0 | 0 | 0 | 0 | 0 | 0  | 4  |
| Gm15658  | 3.767772 | -0.04136 | 5.220821 | 0.022318014 | 1 | 0 | 0 | 0 | 0 | 0 | 0  | 4  |
| 9330155M | 3.761425 | 0.360808 | 6.986728 | 0.008211635 | 1 | 0 | 0 | 0 | 1 | 4 | 8  | 3  |
| Gm40754  | 3.727737 | -0.51121 | 3.943352 | 0.047056936 | 1 | 0 | 0 | 0 | 0 | 2 | 0  | 2  |
| Gm30314  | 3.691955 | -0.09023 | 4.545055 | 0.033013956 | 1 | 0 | 0 | 0 | 0 | 1 | 1  | 2  |
| Kcna3    | 3.687818 | -0.8878  | 4.038263 | 0.044479582 | 1 | 0 | 0 | 0 | 0 | 3 | 0  | 1  |
| Gm33108  | 3.680804 | -0.62444 | 5.397698 | 0.020163331 | 1 | 0 | 0 | 0 | 0 | 1 | 1  | 2  |
| Tnnt2    | 3.671485 | 1.598315 | 6.377377 | 0.011558414 | 1 | 0 | 0 | 0 | 0 | 0 | 1  | 3  |
| Gm2511   | 3.666857 | -0.84964 | 4.134811 | 0.042009759 | 1 | 0 | 0 | 0 | 0 | 0 | 2  | 2  |
| LOC10263 | 3.66255  | 1.035826 | 6.313957 | 0.011979119 | 1 | 0 | 0 | 0 | 0 | 1 | 1  | 2  |
| Fndc7    | 3.65696  | -0.72147 | 4.8494   | 0.027655751 | 1 | 0 | 0 | 0 | 0 | 2 | 1  | 1  |
| Gm40187  | 3.656508 | -0.53119 | 5.04976  | 0.024629356 | 1 | 0 | 0 | 0 | 0 | 2 | 1  | 1  |
| Agtr2    | 3.650797 | 0.35032  | 4.903822 | 0.02679733  | 1 | 0 | 0 | 0 | 0 | 4 | 0  | 0  |
| Stpg2    | 3.649808 | -0.22959 | 4.225902 | 0.039811443 | 1 | 0 | 0 | 0 | 0 | 4 | 0  | 0  |
| Ano9     | 3.649759 | 3.633016 | 6.629393 | 0.010030946 | 1 | 0 | 0 | 0 | 0 | 4 | 0  | 0  |
| Gm39534  | 3.628988 | -0.86971 | 5.097833 | 0.02395576  | 1 | 0 | 0 | 0 | 0 | 3 | 1  | 0  |
| Gm39114  | 3.626749 | -0.48402 | 4.851344 | 0.027624601 | 1 | 0 | 0 | 0 | 0 | 3 | 1  | 0  |
| Krt90    | 3.606951 | 0.990901 | 5.74632  | 0.016523232 | 1 | 0 | 0 | 0 | 0 | 1 | 3  | 0  |
| Slc10a4  | 3.598938 | -0.60964 | 3.921589 | 0.047669815 | 1 | 0 | 0 | 0 | 0 | 0 | 3  | 1  |
| Lmod3    | 3.598601 | -0.5337  | 3.884238 | 0.04874138  | 1 | 0 | 0 | 0 | 0 | 0 | 3  | 1  |
| Gm33433  | 3.598122 | -0.88887 | 4.513556 | 0.033627256 | 1 | 0 | 0 | 0 | 0 | 2 | 2  | 0  |
| BC051408 | 3.593609 | -0.49616 | 6.750474 | 0.009372279 | 1 | 0 | 0 | 1 | 0 | 5 | 5  | 3  |
| Gm31268  | 3.533882 | -0.34755 | 4.000669 | 0.045482195 | 1 | 0 | 0 | 0 | 0 | 0 | 4  | 0  |
| Fgf21    | 3.53093  | -0.70585 | 3.88478  | 0.048725647 | 1 | 0 | 0 | 0 | 0 | 0 | 4  | 0  |
| Zfp947   | 3.507429 | 0.8284   | 8.961195 | 0.002757744 | 1 | 0 | 0 | 1 | 0 | 2 | 5  | 5  |
| Hpn      | 3.501319 | -0.42256 | 4.775928 | 0.02886029  | 1 | 1 | 0 | 0 | 0 | 0 | 11 | 2  |
| Mat1a    | 3.390803 | -0.4223  | 3.87804  | 0.048921638 | 1 | 0 | 0 | 0 | 0 | 0 | 0  | 3  |
| Rasal1   | 3.381824 | -0.0424  | 4.037576 | 0.044497684 | 1 | 0 | 0 | 0 | 0 | 0 | 0  | 3  |
| Zpbp     | 3.367883 | -0.08478 | 5.14104  | 0.023366647 | 1 | 1 | 0 | 0 | 0 | 2 | 10 | 0  |
| LOC10264 | 3.339045 | 0.167092 | 8.5439   | 0.003466821 | 1 | 1 | 1 | 0 | 0 | 2 | 3  | 12 |
| Gm30908  | 3.330536 | -0.86831 | 4.313467 | 0.037811836 | 1 | 0 | 0 | 0 | 0 | 1 | 0  | 2  |
| Gm30021  | 3.309087 | 1.484964 | 4.852245 | 0.027610167 | 1 | 0 | 0 | 0 | 0 | 0 | 0  | 3  |
| 9230117E | 3.303253 | -0.6885  | 4.219154 | 0.03997009  | 1 | 0 | 0 | 0 | 0 | 2 | 0  | 1  |
| Cldn3    | 3.286932 | 3.599401 | 5.004017 | 0.025288567 | 1 | 0 | 0 | 0 | 0 | 0 | 0  | 3  |
| Ces2e    | 3.282403 | 1.639056 | 4.889735 | 0.02701683  | 1 | 0 | 0 | 0 | 0 | 0 | 1  | 2  |
| Otx1     | 3.275964 | 6.584711 | 5.069471 | 0.024350819 | 1 | 0 | 0 | 0 | 0 | 0 | 0  | 3  |
| Hsd17b2  | 3.274109 | 5.635105 | 5.071143 | 0.024327338 | 1 | 0 | 0 | 0 | 0 | 1 | 0  | 2  |
| Adgrf1   | 3.27366  | 5.385168 | 5.058179 | 0.024509974 | 1 | 0 | 0 | 0 | 0 | 0 | 1  | 2  |
| Majin    | 3.273396 | 1.081752 | 4.799191 | 0.028473111 | 1 | 0 | 0 | 0 | 0 | 3 | 0  | 0  |
| Wnt2     | 3.27212  | 3.713093 | 5.037166 | 0.024809044 | 1 | 0 | 0 | 0 | 0 | 3 | 0  | 0  |
| Spink5   | 3.266716 | 6.179182 | 4.875775 | 0.027236213 | 1 | 0 | 0 | 0 | 0 | 0 | 2  | 1  |
| Kcnj15   | 3.264777 | 1.303831 | 4.779043 | 0.028808124 | 1 | 0 | 0 | 0 | 0 | 0 | 2  | 1  |
| Gm38850  | 3.263174 | 2.216487 | 4.693023 | 0.030285314 | 1 | 0 | 0 | 0 | 0 | 0 | 2  | 1  |
| Gm8942   | 3.261824 | -0.44209 | 4.61589  | 0.031677051 | 1 | 0 | 0 | 0 | 0 | 0 | 2  | 1  |
| Gm31984  | 3.252489 | -0.32946 | 3.913007 | 0.047913788 | 1 | 0 | 0 | 0 | 0 | 0 | 2  | 1  |
| LOC10816 | 3.251997 | -0.02334 | 4.228218 | 0.039757159 | 1 | 0 | 0 | 0 | 0 | 2 | 1  | 0  |
| Kif18b   | 3.2477   | 1.037344 | 4.621143 | 0.031580188 | 1 | 0 | 0 | 0 | 0 | 1 | 2  | 0  |
| Gm36043  | 3.247685 | 2.438517 | 4.781583 | 0.028765661 | 1 | 0 | 0 | 0 | 0 | 0 | 3  | 0  |
| Gm10653  | 3.220702 | -0.38268 | 3.920675 | 0.047695734 | 1 | 0 | 0 | 0 | 0 | 1 | 2  | 0  |

|            |          |          |          |             |             |   |     |     |   |     |     |     |
|------------|----------|----------|----------|-------------|-------------|---|-----|-----|---|-----|-----|-----|
| Cdc25c     | 3.181601 | 1.704399 | 7.770079 | 0.005311873 | 1           | 0 | 1   | 0   | 0 | 0   | 9   | 1   |
| Sorbs2os   | 3.157936 | 0.873847 | 7.553473 | 0.005989454 | 1           | 1 | 0   | 0   | 0 | 1   | 9   | 0   |
| LOC10004!  | 3.13523  | -0.09232 | 4.849296 | 0.027657413 | 1           | 0 | 0   | 1   | 0 | 3   | 2   | 4   |
| Grhl2      | 3.10056  | 5.435743 | 21.30568 | 3.9157E-06  | 0.028174261 | 1 | 1   | 0   | 1 | 3   | 16  | 3   |
| Gm36243    | 3.098184 | 0.347617 | 4.882112 | 0.027136394 | 1           | 0 | 1   | 0   | 0 | 1   | 5   | 3   |
| LOC10816!  | 3.078841 | -0.52466 | 3.90467  | 0.048152071 | 1           | 1 | 0   | 0   | 0 | 4   | 3   | 2   |
| LOC10816!  | 2.912178 | 4.436268 | 7.838657 | 0.005114059 | 1           | 0 | 0   | 0   | 1 | 1   | 7   | 0   |
| Speer4b    | 2.90666  | -0.70405 | 4.826485 | 0.028025713 | 1           | 1 | 0   | 0   | 0 | 2   | 4   | 2   |
| Gm35314    | 2.900795 | -0.3485  | 3.908378 | 0.048045942 | 1           | 0 | 0   | 1   | 0 | 4   | 3   | 1   |
| Gm33309    | 2.890968 | -0.29963 | 4.50746  | 0.033747328 | 1           | 0 | 2   | 1   | 0 | 12  | 6   | 1   |
| Gm41561    | 2.857593 | -0.56114 | 4.167688 | 0.041201993 | 1           | 1 | 0   | 0   | 1 | 1   | 11  | 2   |
| Ccdc168    | 2.854559 | 0.256622 | 5.215699 | 0.022383843 | 1           | 0 | 1   | 1   | 0 | 7   | 4   | 2   |
| Rps15a-ps! | 2.854214 | 1.78742  | 9.99575  | 0.001569019 | 1           | 1 | 1   | 0   | 0 | 5   | 5   | 3   |
| Mss51      | 2.851988 | 0.438299 | 8.942574 | 0.002785998 | 1           | 2 | 0   | 1   | 0 | 10  | 8   | 1   |
| Gm28651    | 2.827089 | -0.40885 | 3.966466 | 0.046415099 | 1           | 0 | 0   | 1   | 0 | 3   | 0   | 4   |
| 9230116N   | 2.775573 | 0.413311 | 3.945975 | 0.046983623 | 1           | 1 | 1   | 0   | 0 | 2   | 0   | 9   |
| LOC10816!  | 2.758912 | 0.388746 | 5.209846 | 0.022459318 | 1           | 0 | 0   | 0   | 1 | 6   | 0   | 1   |
| Tgm1       | 2.742877 | 1.948851 | 6.297124 | 0.0120934   | 1           | 0 | 1   | 0   | 0 | 1   | 4   | 2   |
| Gm11210    | 2.722079 | -0.49985 | 3.942198 | 0.047089219 | 1           | 1 | 1   | 1   | 0 | 3   | 14  | 1   |
| Arsi       | 2.715037 | 1.410592 | 7.773995 | 0.005300369 | 1           | 0 | 4   | 0   | 0 | 5   | 14  | 3   |
| A730089K:  | 2.639315 | -0.13821 | 4.904781 | 0.026782451 | 1           | 1 | 2   | 0   | 0 | 0   | 6   | 9   |
| Rin1       | 2.621015 | 4.147035 | 9.02942  | 0.002656688 | 1           | 1 | 1   | 0   | 0 | 3   | 5   | 3   |
| Gm40454    | 2.617576 | 1.174299 | 5.805586 | 0.015975346 | 1           | 0 | 1   | 1   | 0 | 5   | 4   | 2   |
| Gm34979    | 2.602907 | 1.896823 | 9.835642 | 0.001711626 | 1           | 0 | 0   | 1   | 2 | 5   | 11  | 0   |
| Mxd3       | 2.537765 | 1.264468 | 4.634301 | 0.031338903 | 1           | 0 | 1   | 0   | 0 | 1   | 3   | 2   |
| Ltc4s      | 2.52522  | -0.40411 | 4.164499 | 0.041279616 | 1           | 1 | 0   | 2   | 1 | 10  | 0   | 8   |
| 4931440P:  | 2.510875 | 0.252684 | 6.839555 | 0.008916107 | 1           | 0 | 0   | 2   | 2 | 2   | 16  | 2   |
| Gm17059    | 2.408893 | 1.385467 | 10.85596 | 0.000984781 | 1           | 1 | 0   | 2   | 2 | 6   | 13  | 3   |
| LOC10816!  | 2.369379 | 0.367477 | 4.316835 | 0.037737043 | 1           | 0 | 3   | 0   | 5 | 10  | 16  | 7   |
| Pyroxd2    | 2.339075 | 0.637894 | 6.08841  | 0.013607148 | 1           | 1 | 1   | 0   | 0 | 1   | 5   | 3   |
| Gm38523    | 2.321312 | 0.136374 | 3.987625 | 0.045835633 | 1           | 2 | 1   | 0   | 0 | 6   | 6   | 1   |
| Efna4      | 2.240543 | 4.000747 | 11.37587 | 0.000744043 | 0.923024417 | 2 | 2   | 0   | 1 | 10  | 6   | 3   |
| Gm15866    | 2.232123 | 1.560613 | 5.871583 | 0.015387206 | 1           | 1 | 2   | 0   | 1 | 0   | 7   | 8   |
| Gm42244    | 2.227465 | 0.612911 | 4.1048   | 0.042761646 | 1           | 0 | 5   | 0   | 0 | 1   | 14  | 4   |
| Gm38767    | 2.214989 | 0.339908 | 4.844725 | 0.027730815 | 1           | 3 | 0   | 0   | 1 | 7   | 3   | 5   |
| Gm30110    | 2.211593 | 2.123578 | 9.956197 | 0.001603088 | 1           | 2 | 4   | 1   | 3 | 10  | 16  | 10  |
| Sec1414    | 2.20207  | 2.73907  | 5.237491 | 0.022105133 | 1           | 1 | 0   | 1   | 0 | 2   | 1   | 5   |
| LOC10263!  | 2.175944 | 2.825797 | 5.05593  | 0.024541803 | 1           | 0 | 1   | 1   | 0 | 0   | 5   | 3   |
| LOC10105!  | 2.158857 | 0.723968 | 3.974717 | 0.046188215 | 1           | 1 | 0   | 2   | 1 | 7   | 6   | 2   |
| Elf5       | 2.146946 | 2.611917 | 6.796827 | 0.009132    | 1           | 1 | 3   | 2   | 0 | 8   | 8   | 5   |
| Ccnb2      | 2.118334 | 3.454356 | 5.684242 | 0.017111793 | 1           | 0 | 0   | 0   | 3 | 5   | 4   | 2   |
| Rmi2       | 2.107731 | 1.177401 | 5.080074 | 0.024202337 | 1           | 0 | 2   | 0   | 1 | 2   | 7   | 2   |
| Gm15506    | 2.09703  | 0.510856 | 4.033235 | 0.044612314 | 1           | 1 | 2   | 1   | 2 | 2   | 9   | 9   |
| Prrt4      | 2.075981 | 0.320762 | 5.661348 | 0.017342787 | 1           | 2 | 2   | 1   | 0 | 3   | 9   | 5   |
| Gm41719    | 2.070378 | 1.82756  | 4.449619 | 0.034909042 | 1           | 0 | 2   | 2   | 0 | 6   | 7   | 1   |
| Pttg1      | 2.066935 | 6.221246 | 8.447995 | 0.003654461 | 1           | 8 | 194 | 162 | 2 | 384 | 413 | 315 |
| Ky         | 2.012463 | -0.03292 | 4.576543 | 0.032412543 | 1           | 4 | 3   | 0   | 0 | 13  | 5   | 4   |
| Gm30064    | 2.011718 | 2.510133 | 5.168587 | 0.022998919 | 1           | 2 | 0   | 0   | 1 | 2   | 3   | 5   |
| Spint2     | 2.009359 | 6.070949 | 5.821569 | 0.015830819 | 1           | 1 | 1   | 0   | 1 | 3   | 2   | 5   |
| Gm34079    | 2.003065 | 1.088274 | 5.718204 | 0.016789895 | 1           | 0 | 3   | 1   | 4 | 2   | 8   | 14  |
| Dhx58      | 2.001642 | 1.634755 | 4.479004 | 0.034313717 | 1           | 0 | 4   | 1   | 2 | 0   | 19  | 4   |
| Grhl3      | 1.999211 | 3.545284 | 11.02329 | 0.000899741 | 1           | 5 | 1   | 1   | 1 | 9   | 9   | 7   |
| Bmp15      | 1.99171  | 1.033807 | 4.663287 | 0.030814145 | 1           | 2 | 0   | 0   | 1 | 3   | 4   | 3   |
| Gm40372    | 1.976614 | -0.43883 | 3.951907 | 0.046818275 | 1           | 2 | 1   | 0   | 0 | 5   | 4   | 1   |
| 1700124L1  | 1.974756 | 0.070478 | 3.88256  | 0.048790121 | 1           | 1 | 2   | 0   | 0 | 6   | 4   | 0   |
| lkbke      | 1.926188 | 1.840496 | 4.141463 | 0.041844986 | 1           | 0 | 1   | 2   | 0 | 0   | 10  | 0   |
| Il1rl2     | 1.918055 | 3.421452 | 12.34386 | 0.00044244  | 0.705016671 | 1 | 7   | 3   | 0 | 8   | 15  | 9   |
| Gm30082    | 1.870344 | 1.076001 | 6.546173 | 0.010511003 | 1           | 6 | 6   | 3   | 1 | 18  | 18  | 9   |
| Gm38424    | 1.856111 | 2.020384 | 8.217243 | 0.004149419 | 1           | 8 | 0   | 2   | 0 | 2   | 20  | 7   |
| Gm30164    | 1.838972 | 1.605166 | 4.710998 | 0.02997024  | 1           | 0 | 2   | 0   | 2 | 3   | 9   | 0   |
| AW01173!   | 1.827642 | 2.616463 | 7.669999 | 0.005614648 | 1           | 3 | 5   | 0   | 0 | 3   | 11  | 8   |
| AA467197   | 1.825606 | 5.537047 | 3.937716 | 0.047214849 | 1           | 1 | 0   | 2   | 0 | 3   | 5   | 1   |
| Esrp1      | 1.815306 | 7.137428 | 7.192407 | 0.007321271 | 1           | 1 | 2   | 1   | 1 | 6   | 3   | 5   |
| Gm33350    | 1.812444 | 0.813447 | 4.002599 | 0.045430162 | 1           | 1 | 1   | 0   | 4 | 0   | 11  | 6   |
| Tmod4      | 1.807164 | 0.808854 | 4.022009 | 0.044910175 | 1           | 2 | 1   | 0   | 2 | 7   | 4   | 3   |
| 9530034E!  | 1.802572 | 2.00555  | 3.975423 | 0.046168868 | 1           | 0 | 1   | 1   | 1 | 0   | 9   | 0   |

|           |          |          |          |             |             |    |    |    |    |    |    |    |
|-----------|----------|----------|----------|-------------|-------------|----|----|----|----|----|----|----|
| Sigirr    | 1.777158 | 1.370781 | 3.978723 | 0.046078473 | 1           | 0  | 1  | 1  | 2  | 8  | 1  | 2  |
| Gm41832   | 1.77142  | 4.247318 | 5.359296 | 0.020612095 | 1           | 0  | 3  | 0  | 1  | 10 | 0  | 1  |
| Arl1      | 1.76225  | 1.276916 | 6.443152 | 0.011138086 | 1           | 6  | 5  | 4  | 2  | 15 | 7  | 20 |
| Gm33583   | 1.745773 | 2.12932  | 5.209879 | 0.022458901 | 1           | 0  | 6  | 1  | 0  | 14 | 2  | 2  |
| Gm33643   | 1.741619 | 1.865953 | 5.369108 | 0.020496462 | 1           | 0  | 2  | 2  | 1  | 5  | 1  | 7  |
| 4933408B: | 1.739718 | 1.583471 | 6.243165 | 0.012467351 | 1           | 4  | 1  | 1  | 3  | 9  | 12 | 3  |
| Tstd1     | 1.732968 | 2.250022 | 8.176822 | 0.004242903 | 1           | 8  | 13 | 1  | 4  | 26 | 19 | 19 |
| Haus5     | 1.731701 | 0.497041 | 4.498843 | 0.033917804 | 1           | 0  | 4  | 2  | 1  | 4  | 8  | 6  |
| Klh140    | 1.727351 | 0.772517 | 4.196601 | 0.040505096 | 1           | 1  | 2  | 8  | 1  | 8  | 10 | 12 |
| Gm8273    | 1.720667 | 1.21729  | 4.399855 | 0.035941994 | 1           | 0  | 6  | 1  | 9  | 17 | 8  | 14 |
| Gm33696   | 1.701069 | 1.038029 | 4.017416 | 0.04503265  | 1           | 3  | 4  | 2  | 0  | 10 | 10 | 3  |
| Svep1     | 1.662855 | 2.961474 | 7.07199  | 0.007829826 | 1           | 0  | 5  | 2  | 1  | 3  | 14 | 3  |
| C1rl      | 1.632693 | 2.350444 | 5.977492 | 0.014489593 | 1           | 3  | 1  | 3  | 0  | 5  | 7  | 5  |
| Krt13     | 1.615403 | 9.169037 | 6.435821 | 0.011184143 | 1           | 3  | 2  | 2  | 0  | 3  | 12 | 2  |
| Npy       | 1.582393 | 6.939852 | 4.937277 | 0.026283419 | 1           | 0  | 0  | 1  | 4  | 2  | 9  | 1  |
| F420014N: | 1.57632  | 1.716743 | 5.947513 | 0.014738062 | 1           | 4  | 4  | 1  | 2  | 11 | 7  | 7  |
| 9930014A: | 1.550481 | 2.603883 | 7.455595 | 0.006323957 | 1           | 5  | 3  | 3  | 1  | 10 | 10 | 7  |
| Kcnj14    | 1.517935 | 1.270612 | 4.451155 | 0.034877653 | 1           | 14 | 2  | 0  | 11 | 9  | 31 | 20 |
| Tead3     | 1.504125 | 4.325886 | 12.82266 | 0.000342447 | 0.648414993 | 9  | 6  | 7  | 1  | 7  | 29 | 14 |
| LOC10264: | 1.491281 | 0.652327 | 5.069291 | 0.024353342 | 1           | 3  | 3  | 3  | 5  | 11 | 10 | 9  |
| Zfp82     | 1.484021 | 1.319303 | 4.946263 | 0.026147127 | 1           | 7  | 9  | 4  | 1  | 15 | 16 | 13 |
| Gm30883   | 1.480891 | 0.901629 | 5.072541 | 0.024307725 | 1           | 8  | 3  | 4  | 2  | 8  | 20 | 9  |
| Slc25a35  | 1.468261 | 2.003983 | 5.141856 | 0.02335567  | 1           | 2  | 3  | 4  | 2  | 5  | 15 | 4  |
| Scn4a     | 1.461722 | 2.119918 | 6.30987  | 0.012006767 | 1           | 2  | 7  | 10 | 1  | 18 | 16 | 8  |
| Dbx2      | 1.438141 | 3.638121 | 6.947638 | 0.008392996 | 1           | 0  | 7  | 3  | 3  | 13 | 10 | 4  |
| LOC10816: | 1.436671 | 3.278535 | 10.32409 | 0.001313047 | 1           | 8  | 8  | 2  | 3  | 13 | 17 | 13 |
| Gatsl3    | 1.433727 | 3.120927 | 9.139917 | 0.002500924 | 1           | 8  | 3  | 3  | 8  | 21 | 19 | 6  |
| LOC10816: | 1.426769 | 2.748415 | 6.832986 | 0.008948952 | 1           | 5  | 2  | 3  | 8  | 4  | 25 | 9  |
| Phxr4     | 1.412021 | 3.095021 | 5.327405 | 0.020992618 | 1           | 1  | 3  | 3  | 5  | 5  | 15 | 5  |
| Zfp119a   | 1.382314 | 1.75185  | 8.279401 | 0.004009736 | 1           | 4  | 6  | 5  | 2  | 12 | 16 | 6  |
| Fdxacb1   | 1.378981 | 2.248327 | 6.747585 | 0.009387468 | 1           | 5  | 12 | 1  | 1  | 12 | 14 | 11 |
| LOC10816: | 1.371505 | 3.09737  | 5.188954 | 0.022730893 | 1           | 6  | 0  | 3  | 9  | 14 | 19 | 4  |
| Tlr5      | 1.363579 | 3.515049 | 4.413876 | 0.035647754 | 1           | 3  | 0  | 6  | 0  | 16 | 2  | 0  |
| C430049B: | 1.363127 | 3.397502 | 7.594892 | 0.00585339  | 1           | 7  | 7  | 3  | 4  | 16 | 8  | 16 |
| 4833438C: | 1.351295 | 2.095172 | 5.179723 | 0.022851971 | 1           | 2  | 7  | 7  | 4  | 10 | 19 | 10 |
| Pdzk1ip1  | 1.348526 | 7.968541 | 3.969903 | 0.046320438 | 1           | 1  | 1  | 1  | 3  | 5  | 6  | 1  |
| Ak4       | 1.347622 | 2.425285 | 6.986836 | 0.008211138 | 1           | 1  | 4  | 6  | 6  | 15 | 11 | 7  |
| LOC10816: | 1.343176 | 2.394477 | 9.356347 | 0.002222146 | 1           | 10 | 7  | 8  | 6  | 24 | 30 | 7  |
| Gli3      | 1.29975  | 2.311581 | 4.713366 | 0.029928988 | 1           | 3  | 2  | 1  | 3  | 9  | 3  | 5  |
| LOC10816: | 1.296805 | 1.038878 | 3.863239 | 0.04935497  | 1           | 4  | 5  | 9  | 5  | 5  | 7  | 28 |
| LOC10263: | 1.276632 | 2.821842 | 8.343221 | 0.00387129  | 1           | 19 | 12 | 3  | 6  | 24 | 17 | 30 |
| Lhpp      | 1.253456 | 1.992924 | 5.661922 | 0.017337111 | 1           | 3  | 12 | 10 | 2  | 10 | 21 | 17 |
| Tmem202   | 1.241951 | 1.221573 | 5.705746 | 0.016909469 | 1           | 7  | 6  | 7  | 8  | 20 | 22 | 9  |
| Lat2      | 1.237612 | 1.633797 | 4.780049 | 0.028791309 | 1           | 9  | 5  | 7  | 5  | 9  | 24 | 14 |
| Gm32813   | 1.209997 | 3.710347 | 5.808636 | 0.015947657 | 1           | 11 | 4  | 12 | 2  | 6  | 32 | 14 |
| Tmem251   | 1.202352 | 2.74667  | 7.007226 | 0.008118138 | 1           | 9  | 12 | 15 | 13 | 40 | 21 | 23 |
| Gm30294   | 1.194571 | 1.9903   | 3.979234 | 0.046064495 | 1           | 6  | 5  | 10 | 10 | 25 | 12 | 16 |
| Lonrf3    | 1.19293  | 2.740211 | 5.812034 | 0.015916876 | 1           | 2  | 12 | 14 | 7  | 20 | 23 | 17 |
| Prr36     | 1.188447 | 1.556214 | 4.620796 | 0.03158658  | 1           | 11 | 5  | 13 | 13 | 20 | 36 | 18 |
| Zc3h3     | 1.166072 | 2.24016  | 6.446161 | 0.011119233 | 1           | 9  | 6  | 3  | 6  | 7  | 21 | 13 |
| Nccrp1    | 1.163043 | 9.048311 | 5.683053 | 0.017129536 | 1           | 4  | 1  | 2  | 7  | 5  | 13 | 6  |
| LOC10524: | 1.156406 | 2.601686 | 6.316498 | 0.011961962 | 1           | 7  | 14 | 6  | 1  | 14 | 14 | 18 |
| Gm32394   | 1.133378 | 2.338869 | 4.501602 | 0.033863124 | 1           | 1  | 6  | 5  | 7  | 13 | 14 | 5  |
| Aifm2     | 1.131456 | 2.109216 | 3.860149 | 0.049445946 | 1           | 2  | 6  | 13 | 7  | 12 | 23 | 12 |
| Gm39584   | 1.129834 | 4.381067 | 4.689242 | 0.030352036 | 1           | 6  | 4  | 3  | 0  | 4  | 16 | 2  |
| Gm30816   | 1.127841 | 2.925828 | 3.987327 | 0.04584375  | 1           | 15 | 4  | 7  | 6  | 25 | 15 | 13 |
| 1700047A: | 1.114348 | 2.615792 | 4.436121 | 0.0351861   | 1           | 9  | 3  | 4  | 7  | 10 | 10 | 17 |
| Chek1     | 1.110458 | 1.845924 | 3.923022 | 0.047629199 | 1           | 5  | 10 | 3  | 1  | 9  | 14 | 8  |
| Ciart     | 1.104822 | 1.920241 | 4.539512 | 0.033121029 | 1           | 8  | 17 | 10 | 9  | 16 | 28 | 26 |
| Lymr7     | 1.095438 | 2.818406 | 5.312537 | 0.021172504 | 1           | 18 | 40 | 24 | 14 | 47 | 65 | 41 |
| Cnksr3    | 1.074532 | 4.158508 | 5.885062 | 0.015269861 | 1           | 6  | 7  | 3  | 4  | 13 | 13 | 6  |
| Fam195a   | 1.056195 | 1.885082 | 5.975753 | 0.014503884 | 1           | 9  | 6  | 7  | 10 | 13 | 26 | 12 |
| Gm38597   | 1.042343 | 2.899982 | 6.539213 | 0.010552204 | 1           | 13 | 9  | 10 | 20 | 19 | 41 | 22 |
| 9530091C: | 1.022779 | 4.619902 | 7.763032 | 0.005332636 | 1           | 7  | 19 | 18 | 18 | 22 | 39 | 33 |
| Slc22a8   | 1.021403 | 2.237146 | 4.429386 | 0.035325206 | 1           | 15 | 28 | 24 | 20 | 45 | 78 | 15 |
| LOC10816: | 1.021243 | 1.640448 | 4.071954 | 0.043600815 | 1           | 18 | 16 | 7  | 17 | 17 | 48 | 25 |

|          |          |          |          |             |             |     |     |     |     |     |     |     |
|----------|----------|----------|----------|-------------|-------------|-----|-----|-----|-----|-----|-----|-----|
| Pxylp1   | 1.015822 | 4.107915 | 7.139851 | 0.007538943 | 1           | 16  | 13  | 10  | 16  | 25  | 35  | 24  |
| Als2cr12 | 1.000043 | 3.710905 | 5.698817 | 0.016976352 | 1           | 3   | 14  | 7   | 5   | 19  | 10  | 14  |
| Prkd2    | 0.996987 | 4.235604 | 4.945189 | 0.026163383 | 1           | 7   | 8   | 1   | 6   | 11  | 11  | 11  |
| LOC10263 | 0.982329 | 2.07188  | 4.059853 | 0.043914325 | 1           | 5   | 6   | 12  | 8   | 8   | 20  | 18  |
| Tmem194  | 0.974792 | 2.881314 | 5.784258 | 0.016170325 | 1           | 5   | 8   | 8   | 13  | 15  | 17  | 18  |
| Sertad3  | 0.974453 | 4.573178 | 9.484671 | 0.002071958 | 1           | 36  | 48  | 57  | 28  | 94  | 73  | 78  |
| Mapk7    | 0.953694 | 3.268333 | 8.444587 | 0.003661316 | 1           | 31  | 23  | 27  | 22  | 80  | 56  | 17  |
| LOC10816 | 0.942161 | 1.465298 | 3.944448 | 0.047026292 | 1           | 14  | 12  | 16  | 12  | 24  | 25  | 28  |
| Scrn2    | 0.933154 | 3.14477  | 3.841779 | 0.049990442 | 1           | 4   | 7   | 10  | 9   | 13  | 9   | 20  |
| Gm5785   | 0.932421 | 3.707074 | 6.308311 | 0.012017329 | 1           | 9   | 9   | 7   | 13  | 18  | 33  | 5   |
| Phykpl   | 0.914702 | 2.754176 | 4.595229 | 0.032061059 | 1           | 12  | 9   | 8   | 14  | 21  | 28  | 13  |
| Zscan20  | 0.914361 | 2.561537 | 3.995026 | 0.045634753 | 1           | 3   | 14  | 18  | 14  | 23  | 25  | 21  |
| Mpv17l   | 0.912426 | 2.953134 | 6.301274 | 0.012065126 | 1           | 28  | 42  | 35  | 35  | 65  | 85  | 49  |
| Gm29975  | 0.910509 | 3.4599   | 4.803825 | 0.028396628 | 1           | 13  | 23  | 12  | 42  | 30  | 59  | 39  |
| Tuft1    | 0.898198 | 6.354149 | 4.117786 | 0.042434589 | 1           | 4   | 7   | 5   | 3   | 7   | 18  | 2   |
| LOC10816 | 0.884819 | 3.67557  | 4.540353 | 0.033104757 | 1           | 10  | 26  | 8   | 23  | 29  | 40  | 24  |
| Psemb9   | 0.879203 | 4.161977 | 6.501249 | 0.010779875 | 1           | 18  | 12  | 9   | 9   | 24  | 21  | 21  |
| Prss48   | 0.876545 | 3.586099 | 4.259539 | 0.039030523 | 1           | 9   | 7   | 16  | 6   | 17  | 23  | 13  |
| Nova2    | 0.87369  | 2.540211 | 5.741963 | 0.016564272 | 1           | 28  | 34  | 29  | 21  | 52  | 61  | 41  |
| Fadd     | 0.865733 | 4.125502 | 7.845726 | 0.005094099 | 1           | 17  | 10  | 18  | 9   | 24  | 38  | 13  |
| Zkscan17 | 0.860446 | 3.000774 | 5.973242 | 0.014524553 | 1           | 27  | 14  | 11  | 16  | 28  | 43  | 23  |
| Neil1    | 0.860001 | 2.750229 | 5.401778 | 0.020116249 | 1           | 16  | 15  | 11  | 5   | 19  | 26  | 19  |
| Efna3    | 0.856655 | 3.854415 | 4.385349 | 0.036249061 | 1           | 7   | 8   | 9   | 3   | 13  | 16  | 8   |
| Gria1    | 0.856213 | 3.28212  | 5.260411 | 0.021815871 | 1           | 36  | 56  | 39  | 27  | 73  | 72  | 66  |
| Gm31262  | 0.850104 | 2.682236 | 4.011495 | 0.045191057 | 1           | 5   | 6   | 10  | 8   | 10  | 22  | 8   |
| Gm16499  | 0.845623 | 1.873713 | 5.4515   | 0.019551533 | 1           | 13  | 13  | 13  | 12  | 25  | 26  | 18  |
| Tnip2    | 0.839991 | 3.687827 | 5.142308 | 0.023349584 | 1           | 16  | 15  | 7   | 9   | 16  | 26  | 21  |
| Tsen2    | 0.830897 | 2.840015 | 6.611908 | 0.010129907 | 1           | 22  | 32  | 26  | 29  | 70  | 37  | 37  |
| 1700017B | 0.830562 | 3.249057 | 4.632432 | 0.031373071 | 1           | 21  | 17  | 13  | 10  | 32  | 26  | 23  |
| Rnf113a2 | 0.829297 | 2.764778 | 4.722801 | 0.029765228 | 1           | 15  | 14  | 11  | 12  | 21  | 38  | 12  |
| Tbrg3    | 0.818449 | 4.771236 | 5.108862 | 0.023803927 | 1           | 14  | 16  | 14  | 12  | 20  | 37  | 18  |
| Pmf1     | 0.818352 | 4.673755 | 9.636726 | 0.001907249 | 1           | 22  | 43  | 43  | 15  | 71  | 42  | 47  |
| Acy1     | 0.818143 | 2.60037  | 4.003143 | 0.045415504 | 1           | 24  | 18  | 21  | 11  | 22  | 33  | 41  |
| Hap1     | 0.817296 | 2.347307 | 4.452894 | 0.034842159 | 1           | 21  | 30  | 8   | 19  | 50  | 33  | 20  |
| Hpgd     | 0.815941 | 1.749028 | 4.386934 | 0.036215383 | 1           | 14  | 14  | 12  | 17  | 25  | 26  | 24  |
| Abcd1    | 0.815319 | 3.740933 | 7.228286 | 0.00717637  | 1           | 35  | 58  | 41  | 45  | 77  | 105 | 56  |
| Slc25a1  | 0.806006 | 6.688861 | 33.58675 | 6.81554E-09 | 0.000122598 | 393 | 408 | 368 | 366 | 712 | 718 | 574 |
| Naprt    | 0.799075 | 4.861742 | 6.066782 | 0.013774773 | 1           | 18  | 14  | 10  | 10  | 17  | 20  | 30  |
| Cdon     | 0.798281 | 5.052346 | 8.503794 | 0.003544067 | 1           | 15  | 21  | 16  | 17  | 27  | 26  | 36  |
| 4931414P | 0.792917 | 2.955165 | 4.111506 | 0.042592415 | 1           | 12  | 7   | 17  | 11  | 17  | 29  | 16  |
| Ngef     | 0.787357 | 4.228131 | 4.426302 | 0.035389108 | 1           | 7   | 7   | 9   | 7   | 13  | 15  | 11  |
| Fastkd1  | 0.78724  | 2.246896 | 4.358867 | 0.036816784 | 1           | 21  | 16  | 23  | 18  | 35  | 47  | 21  |
| Pkp3     | 0.779974 | 8.320924 | 5.67573  | 0.017201178 | 1           | 5   | 15  | 12  | 10  | 20  | 18  | 16  |
| Nradd    | 0.778937 | 3.406528 | 4.49468  | 0.03400047  | 1           | 20  | 11  | 14  | 10  | 23  | 27  | 21  |
| Zfp408   | 0.775514 | 2.935888 | 4.293564 | 0.0382569   | 1           | 20  | 15  | 12  | 11  | 28  | 23  | 23  |
| Arf2     | 0.770675 | 5.632975 | 23.70065 | 1.12545E-06 | 0.010122256 | 84  | 87  | 87  | 82  | 131 | 164 | 138 |
| Becn1    | 0.768252 | 3.380975 | 5.038661 | 0.024787639 | 1           | 27  | 40  | 35  | 27  | 69  | 44  | 49  |
| Nxt1     | 0.766739 | 3.228375 | 3.958094 | 0.0466465   | 1           | 18  | 21  | 8   | 20  | 27  | 31  | 27  |
| Fmn13    | 0.762466 | 2.875507 | 4.894611 | 0.026940638 | 1           | 9   | 13  | 13  | 19  | 18  | 30  | 21  |
| LOC10816 | 0.761282 | 3.821897 | 4.594966 | 0.032065987 | 1           | 35  | 61  | 39  | 56  | 71  | 90  | 79  |
| Zfp36    | 0.760423 | 5.195642 | 4.177013 | 0.040975868 | 1           | 14  | 27  | 5   | 8   | 21  | 27  | 20  |
| Ublcp1   | 0.759569 | 4.575996 | 7.350611 | 0.006703998 | 1           | 65  | 152 | 129 | 79  | 167 | 202 | 163 |
| Pkn1     | 0.759305 | 4.298815 | 6.830543 | 0.008961201 | 1           | 52  | 47  | 33  | 34  | 59  | 95  | 58  |
| P2rx7    | 0.749813 | 3.313621 | 4.204276 | 0.040322175 | 1           | 35  | 61  | 37  | 45  | 75  | 71  | 74  |
| Dvl1     | 0.733045 | 4.151905 | 7.733598 | 0.005420264 | 1           | 37  | 63  | 42  | 61  | 83  | 91  | 77  |
| Casp2    | 0.729204 | 4.107749 | 4.770462 | 0.028952054 | 1           | 22  | 17  | 7   | 11  | 20  | 30  | 21  |
| Tgif1    | 0.718004 | 3.848212 | 4.23113  | 0.039689001 | 1           | 11  | 12  | 10  | 9   | 12  | 24  | 16  |
| Insig2   | 0.714522 | 5.033879 | 8.213422 | 0.004158166 | 1           | 75  | 86  | 91  | 53  | 134 | 147 | 95  |
| Nfkb2    | 0.708109 | 3.567023 | 4.826674 | 0.028022639 | 1           | 15  | 19  | 19  | 6   | 32  | 22  | 18  |
| Map3k3   | 0.704376 | 5.062255 | 13.14296 | 0.000288602 | 0.586926344 | 54  | 71  | 60  | 32  | 90  | 94  | 79  |
| BC024978 | 0.701223 | 3.423199 | 4.141074 | 0.041854601 | 1           | 10  | 20  | 16  | 13  | 20  | 24  | 27  |
| Ccdc163  | 0.678906 | 2.600531 | 3.921929 | 0.047660173 | 1           | 11  | 22  | 19  | 17  | 30  | 26  | 26  |
| Gramd3   | 0.673115 | 5.493425 | 5.430651 | 0.019786303 | 1           | 24  | 10  | 12  | 9   | 18  | 29  | 19  |
| Bin3     | 0.670509 | 3.29124  | 4.592684 | 0.032108702 | 1           | 23  | 33  | 25  | 17  | 44  | 33  | 38  |
| Tmem106  | 0.667716 | 3.024631 | 4.520824 | 0.033484691 | 1           | 13  | 24  | 10  | 16  | 37  | 15  | 22  |
| Dgat2    | 0.650047 | 4.531924 | 5.374168 | 0.020437085 | 1           | 31  | 31  | 24  | 33  | 52  | 44  | 43  |

|          |          |          |          |             |   |     |      |      |     |      |      |      |
|----------|----------|----------|----------|-------------|---|-----|------|------|-----|------|------|------|
| E130311K | 0.646052 | 3.333579 | 4.69284  | 0.030288551 | 1 | 29  | 35   | 30   | 20  | 48   | 47   | 38   |
| Fam110a  | 0.626241 | 4.847184 | 5.210684 | 0.022448507 | 1 | 15  | 14   | 21   | 17  | 23   | 36   | 19   |
| Phf13    | 0.622382 | 4.207486 | 6.260983 | 0.012342573 | 1 | 32  | 39   | 48   | 38  | 52   | 85   | 46   |
| Kremen1  | 0.622231 | 4.999457 | 4.761424 | 0.029104454 | 1 | 29  | 20   | 24   | 29  | 38   | 45   | 35   |
| Zfp65    | 0.619541 | 3.40181  | 4.188343 | 0.040702856 | 1 | 19  | 29   | 22   | 23  | 28   | 59   | 22   |
| Zcchc14  | 0.607889 | 3.610004 | 4.788597 | 0.02864876  | 1 | 40  | 37   | 30   | 31  | 47   | 54   | 55   |
| Plekhg2  | 0.607317 | 3.516054 | 4.065037 | 0.043779733 | 1 | 37  | 36   | 30   | 22  | 47   | 52   | 43   |
| 2410016O | 0.602914 | 4.718502 | 6.154163 | 0.013110314 | 1 | 56  | 64   | 45   | 46  | 77   | 74   | 85   |
| Phc1     | 0.596267 | 4.680207 | 8.581517 | 0.003395923 | 1 | 45  | 36   | 33   | 39  | 43   | 79   | 52   |
| Mtfp1    | 0.579275 | 3.18887  | 4.208646 | 0.040218418 | 1 | 45  | 52   | 48   | 51  | 59   | 100  | 62   |
| Ina      | 0.567109 | 3.679802 | 6.511682 | 0.010716809 | 1 | 57  | 71   | 49   | 76  | 99   | 117  | 67   |
| Dctpp1   | 0.565198 | 4.24662  | 5.172045 | 0.022953182 | 1 | 37  | 50   | 56   | 36  | 72   | 95   | 35   |
| Wdr4     | 0.563884 | 4.195446 | 4.964688 | 0.025869981 | 1 | 55  | 47   | 45   | 70  | 78   | 76   | 84   |
| Zfp511   | 0.563078 | 3.70275  | 4.36004  | 0.036791441 | 1 | 44  | 51   | 24   | 34  | 61   | 69   | 40   |
| Ltbp4    | 0.561272 | 4.62918  | 4.375196 | 0.036465646 | 1 | 28  | 33   | 29   | 28  | 53   | 42   | 35   |
| Spry4    | 0.557554 | 2.638308 | 4.148016 | 0.041683326 | 1 | 35  | 41   | 35   | 30  | 48   | 66   | 42   |
| Sdc1     | 0.556159 | 8.7174   | 4.092579 | 0.043071871 | 1 | 23  | 24   | 20   | 11  | 24   | 47   | 16   |
| Stxbp3   | 0.551632 | 4.616732 | 4.82548  | 0.02804205  | 1 | 55  | 36   | 21   | 39  | 60   | 47   | 57   |
| Ccdc9    | 0.543914 | 4.337037 | 5.452515 | 0.019540176 | 1 | 50  | 65   | 29   | 49  | 63   | 84   | 63   |
| Tgfb1    | 0.537148 | 5.441946 | 6.02934  | 0.01406999  | 1 | 38  | 45   | 31   | 30  | 48   | 60   | 48   |
| Slc52a2  | 0.536708 | 4.816414 | 5.729701 | 0.016680319 | 1 | 139 | 156  | 161  | 128 | 229  | 232  | 173  |
| Polr2i   | 0.536561 | 4.367938 | 4.553695 | 0.032847778 | 1 | 41  | 53   | 67   | 24  | 73   | 65   | 61   |
| Vps52    | 0.536546 | 4.602248 | 5.922746 | 0.014946642 | 1 | 79  | 84   | 69   | 73  | 101  | 152  | 82   |
| Mospd3   | 0.518432 | 5.31249  | 4.439397 | 0.035118648 | 1 | 50  | 54   | 99   | 57  | 120  | 88   | 71   |
| Srf      | 0.516574 | 5.046681 | 4.629361 | 0.031429271 | 1 | 68  | 82   | 61   | 30  | 99   | 76   | 79   |
| Dot1l    | 0.510361 | 5.426139 | 6.401035 | 0.011405387 | 1 | 72  | 139  | 76   | 102 | 133  | 148  | 129  |
| Lsm7     | 0.502277 | 4.503689 | 4.20388  | 0.040331598 | 1 | 83  | 94   | 98   | 84  | 144  | 127  | 108  |
| Dtx2     | 0.50139  | 4.553039 | 3.954409 | 0.046748725 | 1 | 31  | 44   | 36   | 35  | 60   | 51   | 43   |
| Pex16    | 0.500716 | 4.473498 | 5.628156 | 0.017674218 | 1 | 80  | 92   | 64   | 57  | 101  | 128  | 82   |
| Sh3gl1   | 0.496849 | 4.558828 | 4.473132 | 0.034431819 | 1 | 54  | 57   | 59   | 33  | 76   | 84   | 55   |
| Cdyl2    | 0.489115 | 3.781238 | 4.650594 | 0.031042804 | 1 | 63  | 86   | 74   | 61  | 99   | 137  | 66   |
| Map2k3   | 0.482087 | 6.409921 | 7.199936 | 0.007290618 | 1 | 61  | 53   | 56   | 84  | 91   | 97   | 78   |
| Depdc7   | 0.477126 | 3.712773 | 4.110282 | 0.042623262 | 1 | 64  | 69   | 51   | 67  | 86   | 81   | 91   |
| Taf1d    | 0.475134 | 5.476843 | 6.520522 | 0.010663671 | 1 | 100 | 105  | 106  | 92  | 116  | 198  | 110  |
| Crlf2    | 0.47274  | 4.684777 | 4.182831 | 0.040835428 | 1 | 65  | 55   | 41   | 70  | 69   | 111  | 63   |
| Cacnb1   | 0.471412 | 4.795604 | 5.37694  | 0.020404639 | 1 | 139 | 211  | 192  | 163 | 259  | 286  | 188  |
| Pelo     | 0.466807 | 4.804686 | 7.056855 | 0.00789625  | 1 | 74  | 142  | 96   | 117 | 143  | 171  | 128  |
| Gosr2    | 0.464839 | 4.7156   | 5.546859 | 0.018513885 | 1 | 75  | 72   | 80   | 74  | 111  | 106  | 93   |
| Itga3    | 0.45997  | 6.607641 | 5.237623 | 0.022103449 | 1 | 121 | 138  | 137  | 131 | 207  | 193  | 143  |
| Ttll12   | 0.454506 | 4.642737 | 3.937929 | 0.047208876 | 1 | 54  | 54   | 51   | 74  | 69   | 116  | 58   |
| Grn      | 0.454352 | 7.472756 | 4.160103 | 0.041386886 | 1 | 278 | 303  | 270  | 243 | 454  | 342  | 316  |
| Sft2d2   | 0.450508 | 6.173066 | 7.38731  | 0.006568564 | 1 | 91  | 91   | 72   | 72  | 119  | 114  | 99   |
| Pcyox1l  | 0.448359 | 5.577312 | 4.24273  | 0.039418726 | 1 | 255 | 344  | 342  | 309 | 510  | 462  | 309  |
| Sac3d1   | 0.443592 | 4.812187 | 5.036636 | 0.02481664  | 1 | 59  | 99   | 96   | 89  | 129  | 128  | 92   |
| Rnpep    | 0.441728 | 6.81221  | 5.482792 | 0.019204559 | 1 | 52  | 85   | 83   | 63  | 82   | 142  | 67   |
| Il4ra    | 0.438843 | 4.271513 | 4.557658 | 0.032771859 | 1 | 94  | 114  | 96   | 70  | 107  | 164  | 109  |
| Nav3     | 0.423396 | 5.269858 | 4.02501  | 0.044830358 | 1 | 108 | 168  | 164  | 178 | 225  | 244  | 155  |
| Tssc1    | 0.419328 | 5.05672  | 4.966747 | 0.025839202 | 1 | 104 | 105  | 118  | 91  | 157  | 162  | 102  |
| Gap43    | 0.418973 | 7.425221 | 4.741665 | 0.029440571 | 1 | 934 | 1235 | 1115 | 954 | 1404 | 1611 | 1213 |
| Fzr1     | 0.40637  | 6.061041 | 8.805832 | 0.003002692 | 1 | 188 | 197  | 181  | 131 | 216  | 269  | 205  |
| Tada2a   | 0.404181 | 5.007299 | 4.718096 | 0.029846782 | 1 | 114 | 114  | 87   | 94  | 135  | 182  | 93   |
| Pdxk     | 0.403069 | 6.876313 | 7.451907 | 0.006336928 | 1 | 143 | 150  | 143  | 130 | 201  | 216  | 145  |
| Fam214b  | 0.401665 | 6.222898 | 5.368471 | 0.020503941 | 1 | 116 | 147  | 109  | 117 | 133  | 208  | 143  |
| Plrg1    | 0.388867 | 5.687754 | 6.72396  | 0.009512618 | 1 | 136 | 192  | 145  | 135 | 167  | 245  | 182  |
| Cep170b  | 0.383124 | 7.104357 | 8.058923 | 0.004528009 | 1 | 256 | 270  | 303  | 220 | 328  | 438  | 266  |
| Akap5    | 0.381628 | 6.473028 | 4.467914 | 0.034537126 | 1 | 379 | 456  | 442  | 331 | 540  | 451  | 543  |
| Rnf40    | 0.381453 | 5.095615 | 4.859582 | 0.027492992 | 1 | 77  | 110  | 82   | 96  | 106  | 141  | 108  |
| Sumo3    | 0.371774 | 8.137887 | 6.011866 | 0.014209992 | 1 | 640 | 830  | 904  | 647 | 1003 | 1058 | 851  |
| Irf3     | 0.371458 | 5.180966 | 3.87415  | 0.04903513  | 1 | 62  | 64   | 52   | 73  | 73   | 102  | 69   |
| Pacsin3  | 0.370318 | 5.612155 | 4.116969 | 0.042455088 | 1 | 92  | 131  | 115  | 114 | 158  | 167  | 113  |
| Ctdnep1  | 0.369119 | 5.522843 | 3.885972 | 0.048691066 | 1 | 118 | 99   | 133  | 89  | 135  | 164  | 126  |
| Kdm6a    | 0.365418 | 4.810481 | 4.964838 | 0.02586774  | 1 | 76  | 95   | 53   | 55  | 86   | 94   | 87   |
| Vgf      | 0.362174 | 5.332646 | 4.039975 | 0.044434489 | 1 | 254 | 272  | 255  | 208 | 323  | 421  | 220  |
| Tor1aip2 | 0.361675 | 6.711552 | 6.693155 | 0.009678375 | 1 | 139 | 165  | 181  | 157 | 214  | 239  | 166  |
| 2510039O | 0.360361 | 6.302971 | 4.077573 | 0.043456038 | 1 | 120 | 159  | 158  | 158 | 210  | 249  | 121  |
| Myadm    | 0.360315 | 5.594049 | 5.336025 | 0.020889051 | 1 | 282 | 295  | 286  | 246 | 331  | 456  | 286  |

|          |          |          |          |             |   |      |      |      |      |      |      |      |
|----------|----------|----------|----------|-------------|---|------|------|------|------|------|------|------|
| Snrpd3   | 0.358325 | 7.420267 | 5.392177 | 0.020227217 | 1 | 491  | 615  | 496  | 361  | 589  | 662  | 607  |
| Ccdc50   | 0.356301 | 6.265366 | 5.05092  | 0.024612863 | 1 | 177  | 254  | 182  | 196  | 234  | 291  | 244  |
| Snrnp70  | 0.355139 | 7.773808 | 4.590501 | 0.032149611 | 1 | 524  | 713  | 398  | 608  | 657  | 759  | 703  |
| Bc1      | 0.354692 | 8.198465 | 3.858701 | 0.049488643 | 1 | 1003 | 1235 | 1114 | 1032 | 1763 | 1345 | 1072 |
| Ehd1     | 0.353881 | 6.72476  | 5.972607 | 0.014529788 | 1 | 138  | 153  | 153  | 158  | 188  | 226  | 163  |
| Ccnl2    | 0.353138 | 5.92357  | 4.827063 | 0.028016313 | 1 | 152  | 156  | 121  | 126  | 199  | 183  | 147  |
| Dlgap3   | 0.352543 | 4.256886 | 4.509442 | 0.033708227 | 1 | 123  | 124  | 136  | 117  | 147  | 182  | 148  |
| Rnf112   | 0.351947 | 5.38086  | 5.257999 | 0.021846128 | 1 | 216  | 289  | 244  | 310  | 361  | 350  | 296  |
| Emd      | 0.351778 | 5.818106 | 5.31208  | 0.021178053 | 1 | 135  | 152  | 137  | 157  | 188  | 231  | 140  |
| Yipf4    | 0.350781 | 5.351106 | 5.128846 | 0.023531365 | 1 | 154  | 165  | 157  | 147  | 209  | 244  | 146  |
| Vps36    | 0.350155 | 5.583673 | 4.160437 | 0.04137873  | 1 | 111  | 122  | 94   | 98   | 111  | 162  | 131  |
| Ddhd1    | 0.34311  | 5.22648  | 5.984518 | 0.014431987 | 1 | 198  | 215  | 166  | 143  | 230  | 260  | 194  |
| Dnpep    | 0.341963 | 6.173906 | 7.704011 | 0.005509824 | 1 | 181  | 186  | 212  | 207  | 256  | 293  | 200  |
| Ddr1     | 0.341377 | 7.937609 | 6.465762 | 0.010997246 | 1 | 193  | 268  | 212  | 173  | 267  | 320  | 215  |
| Rarg     | 0.332151 | 8.127643 | 5.000894 | 0.025334232 | 1 | 196  | 168  | 179  | 133  | 190  | 242  | 203  |
| Foxo3    | 0.32971  | 6.333536 | 5.586507 | 0.018099355 | 1 | 183  | 231  | 215  | 165  | 250  | 266  | 226  |
| Ubqln4   | 0.32747  | 5.405567 | 4.10224  | 0.042826433 | 1 | 137  | 179  | 148  | 135  | 191  | 200  | 168  |
| Samd12   | 0.327291 | 5.901981 | 4.586844 | 0.032218286 | 1 | 243  | 283  | 225  | 213  | 293  | 372  | 243  |
| Ngdn     | 0.324741 | 5.529973 | 4.4979   | 0.033936506 | 1 | 129  | 154  | 143  | 114  | 194  | 176  | 135  |
| Tmcc1    | 0.322166 | 5.615784 | 6.438525 | 0.01116713  | 1 | 179  | 168  | 159  | 171  | 194  | 275  | 169  |
| Ppp3r1   | 0.315657 | 7.733055 | 5.356853 | 0.020640989 | 1 | 857  | 976  | 951  | 822  | 1118 | 1294 | 948  |
| Atp6vOb  | 0.314994 | 8.012093 | 3.982297 | 0.045980817 | 1 | 870  | 969  | 1172 | 1048 | 1287 | 1566 | 967  |
| Gng12    | 0.313765 | 6.722468 | 5.326487 | 0.021003682 | 1 | 140  | 160  | 160  | 163  | 194  | 225  | 165  |
| Ets2     | 0.308613 | 6.550416 | 3.842294 | 0.049975097 | 1 | 117  | 132  | 141  | 119  | 114  | 199  | 158  |
| Lcor     | 0.307707 | 6.386707 | 4.065448 | 0.043769079 | 1 | 176  | 156  | 138  | 165  | 194  | 213  | 180  |
| Shisa5   | 0.303091 | 6.67784  | 5.011051 | 0.025186016 | 1 | 214  | 276  | 221  | 226  | 305  | 364  | 203  |
| U2af2    | 0.302163 | 6.713925 | 4.427428 | 0.035365764 | 1 | 287  | 297  | 240  | 269  | 368  | 378  | 265  |
| Maoa     | 0.299188 | 5.553135 | 4.438683 | 0.035133349 | 1 | 244  | 298  | 234  | 224  | 309  | 295  | 304  |
| Ncln     | 0.294138 | 5.644259 | 4.012302 | 0.045169438 | 1 | 154  | 155  | 181  | 163  | 199  | 250  | 155  |
| Lsm6     | 0.274715 | 6.324347 | 4.391644 | 0.036115474 | 1 | 246  | 249  | 256  | 211  | 279  | 332  | 259  |
| Atp6v1f  | 0.274036 | 8.331132 | 5.481597 | 0.019217689 | 1 | 1266 | 1434 | 1466 | 1117 | 1639 | 1901 | 1261 |
| Tmem14c  | 0.268557 | 6.320716 | 3.868038 | 0.049214011 | 1 | 224  | 306  | 267  | 219  | 342  | 336  | 237  |
| Fyn      | 0.268435 | 5.919639 | 5.003538 | 0.025295562 | 1 | 390  | 434  | 385  | 345  | 393  | 569  | 436  |
| Aamp     | 0.261929 | 7.821046 | 4.251455 | 0.039216722 | 1 | 525  | 732  | 629  | 576  | 819  | 841  | 554  |
| Naa35    | 0.259165 | 6.648721 | 4.033861 | 0.044595773 | 1 | 244  | 271  | 244  | 215  | 301  | 302  | 264  |
| Nedd8    | 0.251465 | 8.721455 | 4.447942 | 0.034943326 | 1 | 1417 | 1723 | 1655 | 1310 | 1894 | 2070 | 1476 |
| Akt1     | 0.249785 | 7.364651 | 4.99788  | 0.025378386 | 1 | 656  | 670  | 713  | 559  | 839  | 895  | 590  |
| 2310022B | 0.246041 | 6.762892 | 4.563041 | 0.032669021 | 1 | 245  | 275  | 249  | 252  | 300  | 329  | 274  |
| Smim15   | 0.234051 | 6.452912 | 3.8505   | 0.049731171 | 1 | 218  | 285  | 204  | 206  | 269  | 297  | 234  |
| Ptges3   | 0.23306  | 7.469345 | 3.901306 | 0.048248589 | 1 | 636  | 880  | 770  | 642  | 851  | 946  | 762  |
| Ldlr     | 0.230994 | 8.384465 | 4.310689 | 0.037873617 | 1 | 524  | 558  | 509  | 510  | 652  | 669  | 522  |
| S100a6   | 0.210539 | 12.80554 | 4.104921 | 0.04275859  | 1 | 4907 | 5268 | 5761 | 4558 | 6390 | 6464 | 4895 |

**Downregulated genes**

|           |          |          |          |             |             |   |   |   |    |   |   |   |
|-----------|----------|----------|----------|-------------|-------------|---|---|---|----|---|---|---|
| 3110021A  | -5.53401 | 1.857178 | 18.28809 | 1.89891E-05 | 0.08539381  | 5 | 6 | 3 | 7  | 0 | 0 | 0 |
| AW04773C  | -5.42349 | -0.34356 | 6.411225 | 0.011340114 | 1           | 3 | 2 | 0 | 14 | 0 | 0 | 0 |
| Tfap2c    | -5.39454 | 5.155689 | 20.22957 | 6.86831E-06 | 0.035299197 | 6 | 4 | 0 | 9  | 0 | 0 | 0 |
| Trim63    | -5.38946 | -0.33005 | 10.20924 | 0.001397387 | 1           | 7 | 6 | 2 | 4  | 0 | 0 | 0 |
| Gm35855   | -5.31308 | 0.321223 | 11.79729 | 0.000593169 | 0.790364922 | 6 | 6 | 1 | 5  | 0 | 0 | 0 |
| Gm40715   | -5.16666 | -0.43991 | 5.209513 | 0.022463632 | 1           | 3 | 2 | 7 | 4  | 0 | 0 | 0 |
| Neurog1   | -5.0962  | -0.48191 | 4.778054 | 0.028824671 | 1           | 4 | 1 | 0 | 10 | 0 | 0 | 0 |
| A730056A  | -4.93406 | -0.22403 | 5.388899 | 0.02026525  | 1           | 2 | 7 | 3 | 2  | 0 | 0 | 0 |
| Skint3    | -4.92526 | -0.48176 | 8.070671 | 0.004498745 | 1           | 4 | 9 | 0 | 1  | 0 | 0 | 0 |
| Gm30296   | -4.89893 | -0.08838 | 4.261469 | 0.0389862   | 1           | 0 | 0 | 4 | 9  | 0 | 0 | 0 |
| Dyrk4     | -4.88989 | -0.42216 | 6.781461 | 0.009210947 | 1           | 2 | 0 | 6 | 5  | 0 | 0 | 0 |
| A430078I0 | -4.8731  | 0.659213 | 8.654627 | 0.003262319 | 1           | 8 | 2 | 2 | 1  | 0 | 0 | 0 |
| 1700028E1 | -4.85153 | 0.021972 | 6.067017 | 0.013772938 | 1           | 1 | 5 | 1 | 6  | 0 | 0 | 0 |
| Fam205c   | -4.8508  | -0.7031  | 5.158426 | 0.023133856 | 1           | 5 | 5 | 0 | 3  | 0 | 0 | 0 |
| Fbxo48    | -4.84072 | -0.22982 | 5.000022 | 0.025346999 | 1           | 4 | 6 | 0 | 3  | 0 | 0 | 0 |
| Gm31898   | -4.77467 | -0.72256 | 5.710319 | 0.016865476 | 1           | 1 | 1 | 3 | 7  | 0 | 0 | 0 |
| C430042M  | -4.77123 | 0.13429  | 9.094189 | 0.002564229 | 1           | 4 | 1 | 0 | 7  | 0 | 0 | 0 |
| Adgrg5    | -4.76079 | -0.7027  | 8.560006 | 0.003436283 | 1           | 1 | 2 | 3 | 6  | 0 | 0 | 0 |
| Snord68   | -4.75794 | -0.35784 | 5.420318 | 0.019903736 | 1           | 4 | 2 | 5 | 1  | 0 | 0 | 0 |
| K230010J2 | -4.75109 | -0.10453 | 7.598122 | 0.005842912 | 1           | 4 | 3 | 3 | 2  | 0 | 0 | 0 |
| Tnfrsf11b | -4.75039 | 1.738532 | 12.30921 | 0.000450728 | 0.705016671 | 1 | 3 | 3 | 5  | 0 | 0 | 0 |
| Slc15a3   | -4.6488  | -0.33737 | 4.806642 | 0.028350241 | 1           | 7 | 1 | 3 | 0  | 0 | 0 | 0 |
| LOC102631 | -4.64534 | -0.75648 | 6.728086 | 0.009490638 | 1           | 5 | 1 | 4 | 1  | 0 | 0 | 0 |

|           |          |           |          |             |   |   |   |    |   |   |   |   |
|-----------|----------|-----------|----------|-------------|---|---|---|----|---|---|---|---|
| Rnf222    | -4.64163 | 1.042954  | 8.364263 | 0.003826717 | 1 | 0 | 0 | 11 | 0 | 0 | 0 | 0 |
| 5730522E  | -4.64139 | -0.27212  | 6.157447 | 0.013085997 | 1 | 9 | 2 | 0  | 0 | 0 | 0 | 0 |
| Ccdc170   | -4.63038 | -0.23221  | 6.748995 | 0.009380053 | 1 | 2 | 3 | 2  | 4 | 0 | 0 | 0 |
| Clhc1     | -4.58307 | -0.26954  | 4.498691 | 0.033920805 | 1 | 3 | 7 | 1  | 0 | 0 | 0 | 0 |
| Gm30335   | -4.53551 | -0.46768  | 4.417905 | 0.035563681 | 1 | 0 | 0 | 2  | 8 | 0 | 0 | 0 |
| Gm39526   | -4.52556 | -0.23312  | 5.415569 | 0.019957953 | 1 | 0 | 1 | 0  | 9 | 0 | 0 | 0 |
| Gabra6    | -4.52489 | -0.68622  | 5.274454 | 0.021640575 | 1 | 5 | 0 | 4  | 1 | 0 | 0 | 0 |
| Prr32     | -4.52152 | -0.54139  | 5.883548 | 0.015282995 | 1 | 1 | 0 | 6  | 3 | 0 | 0 | 0 |
| Gm12052   | -4.51356 | -0.653    | 3.979852 | 0.046047622 | 1 | 2 | 2 | 0  | 6 | 0 | 0 | 0 |
| Gm10406   | -4.49883 | -0.65575  | 4.844719 | 0.027730918 | 1 | 0 | 3 | 1  | 6 | 0 | 0 | 0 |
| Gm2449    | -4.49106 | -0.65159  | 4.530826 | 0.033289538 | 1 | 0 | 3 | 4  | 3 | 0 | 0 | 0 |
| Sult6b1   | -4.47304 | -0.082    | 7.981503 | 0.004725768 | 1 | 3 | 6 | 0  | 1 | 0 | 0 | 0 |
| Taf7l     | -4.47216 | -0.60515  | 3.971668 | 0.046271902 | 1 | 3 | 5 | 0  | 2 | 0 | 0 | 0 |
| Pcdhgc3   | -4.46798 | -0.4479   | 5.105872 | 0.023844994 | 1 | 1 | 5 | 3  | 1 | 0 | 0 | 0 |
| Gm38779   | -4.376   | -0.81123  | 4.912957 | 0.026655975 | 1 | 4 | 1 | 0  | 4 | 0 | 0 | 0 |
| Fbxl22    | -4.35263 | 0.330523  | 5.503767 | 0.018975558 | 1 | 3 | 2 | 4  | 0 | 0 | 0 | 0 |
| Gm5868    | -4.34079 | -0.41226  | 6.163983 | 0.013037731 | 1 | 0 | 3 | 5  | 1 | 0 | 0 | 0 |
| Cst7      | -4.33802 | -0.57216  | 4.353746 | 0.036927629 | 1 | 0 | 4 | 0  | 5 | 0 | 0 | 0 |
| 4930599N  | -4.32979 | -0.36512  | 5.18411  | 0.02279435  | 1 | 2 | 4 | 3  | 0 | 0 | 0 | 0 |
| Gm12248   | -4.22523 | -0.35323  | 4.984722 | 0.025572091 | 1 | 4 | 0 | 0  | 4 | 0 | 0 | 0 |
| Npm2      | -4.22475 | -0.21999  | 5.543715 | 0.018547172 | 1 | 1 | 0 | 0  | 7 | 0 | 0 | 0 |
| Gm36443   | -4.22285 | -0.4817   | 5.25434  | 0.021892109 | 1 | 2 | 0 | 1  | 5 | 0 | 0 | 0 |
| Gm35200   | -4.2159  | -0.42872  | 4.653545 | 0.030989493 | 1 | 3 | 0 | 4  | 1 | 0 | 0 | 0 |
| Vtcn1     | -4.21117 | 0.18758   | 6.247593 | 0.012436221 | 1 | 5 | 0 | 3  | 0 | 0 | 0 | 0 |
| Abca4     | -4.20743 | -0.05847  | 4.223624 | 0.039864941 | 1 | 0 | 1 | 3  | 4 | 0 | 0 | 0 |
| Ankle1    | -4.20227 | 1.312284  | 7.952449 | 0.004802234 | 1 | 3 | 0 | 2  | 3 | 0 | 0 | 0 |
| Gm34168   | -4.20162 | -0.70575  | 4.364127 | 0.036703292 | 1 | 3 | 1 | 4  | 0 | 0 | 0 | 0 |
| Gm38426   | -4.19698 | 2.809487  | 8.319288 | 0.003922629 | 1 | 4 | 0 | 4  | 0 | 0 | 0 | 0 |
| Ltf       | -4.19158 | 2.145187  | 7.579022 | 0.005905148 | 1 | 0 | 2 | 3  | 3 | 0 | 0 | 0 |
| Tmem30b   | -4.19149 | 4.111139  | 8.611124 | 0.003340948 | 1 | 1 | 2 | 2  | 3 | 0 | 0 | 0 |
| Altoart2  | -4.19053 | -0.44014  | 5.526667 | 0.018728748 | 1 | 2 | 2 | 3  | 1 | 0 | 0 | 0 |
| Gm32345   | -4.1875  | -0.72119  | 4.564826 | 0.032634981 | 1 | 2 | 2 | 4  | 0 | 0 | 0 | 0 |
| CJ186046F | -4.18297 | -0.5573   | 4.299622 | 0.038120836 | 1 | 0 | 3 | 1  | 4 | 0 | 0 | 0 |
| H2-Q2     | -4.18183 | -0.45177  | 4.490039 | 0.034092901 | 1 | 5 | 3 | 0  | 0 | 0 | 0 | 0 |
| Tslp      | -4.17841 | -0.10916  | 6.889864 | 0.008668585 | 1 | 1 | 4 | 0  | 3 | 0 | 0 | 0 |
| Gpr119    | -4.16972 | -0.79469  | 5.001452 | 0.025326057 | 1 | 0 | 4 | 1  | 3 | 0 | 0 | 0 |
| Gm41753   | -4.16789 | -0.69096  | 5.154008 | 0.023192775 | 1 | 3 | 4 | 1  | 0 | 0 | 0 | 0 |
| 6230400D  | -4.1136  | -0.04977  | 4.654596 | 0.030970523 | 1 | 0 | 8 | 0  | 0 | 0 | 0 | 0 |
| Gm12915   | -4.04198 | -0.54693  | 3.890857 | 0.048549635 | 1 | 4 | 0 | 1  | 2 | 0 | 0 | 0 |
| Gm31909   | -4.03016 | -0.11965  | 4.745695 | 0.029371692 | 1 | 3 | 0 | 4  | 0 | 0 | 0 | 0 |
| Orm1      | -4.02749 | -0.73737  | 4.43388  | 0.035232324 | 1 | 0 | 1 | 1  | 5 | 0 | 0 | 0 |
| Sp5       | -4.02706 | -0.75685  | 4.417103 | 0.035580392 | 1 | 4 | 1 | 0  | 2 | 0 | 0 | 0 |
| Gm40180   | -4.02698 | -0.61744  | 3.879276 | 0.048885633 | 1 | 2 | 1 | 1  | 3 | 0 | 0 | 0 |
| Zfp92     | -4.02278 | 0.630462  | 5.695459 | 0.017008862 | 1 | 1 | 0 | 6  | 0 | 0 | 0 | 0 |
| Gm15972   | -4.02161 | 0.417554  | 5.039201 | 0.024779913 | 1 | 5 | 1 | 1  | 0 | 0 | 0 | 0 |
| Gm33370   | -4.01949 | -0.44034  | 6.108683 | 0.013451935 | 1 | 3 | 1 | 1  | 2 | 0 | 0 | 0 |
| Tlr6      | -4.01941 | 0.543299  | 4.96446  | 0.025873396 | 1 | 1 | 1 | 3  | 2 | 0 | 0 | 0 |
| C5ar1     | -4.01925 | -0.48367  | 4.579196 | 0.0323624   | 1 | 2 | 1 | 3  | 1 | 0 | 0 | 0 |
| Gm26847   | -4.01924 | -0.12418  | 3.905415 | 0.048130725 | 1 | 3 | 1 | 3  | 0 | 0 | 0 | 0 |
| Slc12a8   | -4.01921 | -0.36843  | 3.93404  | 0.047318143 | 1 | 3 | 1 | 3  | 0 | 0 | 0 | 0 |
| Oacyl     | -4.01865 | 0.462377  | 5.734327 | 0.016636445 | 1 | 3 | 1 | 2  | 1 | 0 | 0 | 0 |
| Gm26698   | -4.01703 | 1.5033    | 6.983296 | 0.008227396 | 1 | 1 | 1 | 0  | 5 | 0 | 0 | 0 |
| Ak7       | -4.0168  | 0.376842  | 5.336814 | 0.020879605 | 1 | 0 | 1 | 4  | 2 | 0 | 0 | 0 |
| Dll1      | -4.01523 | 3.264433  | 7.502021 | 0.00616298  | 1 | 2 | 0 | 0  | 5 | 0 | 0 | 0 |
| Fam71f2   | -4.01314 | -0.60688  | 4.291348 | 0.038306793 | 1 | 2 | 2 | 0  | 3 | 0 | 0 | 0 |
| Gm32926   | -4.01227 | -0.62432  | 4.170776 | 0.04112697  | 1 | 3 | 2 | 0  | 2 | 0 | 0 | 0 |
| Gm33228   | -4.01213 | -0.70501  | 5.720835 | 0.01676476  | 1 | 2 | 2 | 0  | 3 | 0 | 0 | 0 |
| Gm39055   | -4.01037 | -0.40587  | 4.498247 | 0.033929626 | 1 | 5 | 2 | 0  | 0 | 0 | 0 | 0 |
| Gm39171   | -4.00824 | -0.182895 | 5.678368 | 0.017175335 | 1 | 1 | 2 | 2  | 2 | 0 | 0 | 0 |
| Epha8     | -3.99657 | -0.29299  | 4.971856 | 0.025762992 | 1 | 1 | 3 | 1  | 2 | 0 | 0 | 0 |
| Gm33098   | -3.99336 | 2.128376  | 7.273683 | 0.006997218 | 1 | 0 | 7 | 0  | 0 | 0 | 0 | 0 |
| Syt10     | -3.98336 | -0.5272   | 4.973542 | 0.025737894 | 1 | 0 | 4 | 1  | 2 | 0 | 0 | 0 |
| 4930525G  | -3.97592 | 0.168928  | 4.156032 | 0.041486494 | 1 | 0 | 4 | 2  | 1 | 0 | 0 | 0 |
| 1700109K  | -3.97464 | 0.217688  | 5.249722 | 0.021950276 | 1 | 0 | 5 | 0  | 2 | 0 | 0 | 0 |
| Hbq1a     | -3.83347 | -0.86807  | 3.880603 | 0.048847015 | 1 | 1 | 0 | 1  | 4 | 0 | 0 | 0 |
| Gm35235   | -3.82726 | -0.45801  | 4.189147 | 0.040683568 | 1 | 2 | 0 | 2  | 2 | 0 | 0 | 0 |

|            |          |          |          |             |             |    |    |    |    |   |   |   |
|------------|----------|----------|----------|-------------|-------------|----|----|----|----|---|---|---|
| 4933433G   | -3.81686 | -0.48239 | 4.220034 | 0.039949355 | 1           | 2  | 1  | 0  | 3  | 0 | 0 | 0 |
| LOC108163  | -3.81625 | -0.88809 | 3.956729 | 0.046684331 | 1           | 0  | 1  | 1  | 4  | 0 | 0 | 0 |
| Tmem190    | -3.81617 | 0.480332 | 5.740403 | 0.016578988 | 1           | 0  | 0  | 2  | 4  | 0 | 0 | 0 |
| Gm36316    | -3.81516 | -0.68701 | 3.988165 | 0.045820948 | 1           | 1  | 1  | 1  | 3  | 0 | 0 | 0 |
| Lbx2       | -3.81248 | -0.39385 | 4.276447 | 0.038644044 | 1           | 3  | 1  | 1  | 1  | 0 | 0 | 0 |
| Ces5a      | -3.81223 | -0.15941 | 4.676392 | 0.030579904 | 1           | 2  | 1  | 1  | 2  | 0 | 0 | 0 |
| Car9       | -3.80681 | 2.711371 | 6.480608 | 0.010905768 | 1           | 1  | 0  | 0  | 5  | 0 | 0 | 0 |
| Usp43      | -3.80416 | 2.358084 | 6.468208 | 0.010982124 | 1           | 3  | 1  | 0  | 2  | 0 | 0 | 0 |
| Slc6a14    | -3.80388 | 6.013522 | 6.513144 | 0.010708001 | 1           | 0  | 0  | 6  | 0  | 0 | 0 | 0 |
| Bnc1       | -3.80301 | 4.331699 | 6.569594 | 0.010373562 | 1           | 0  | 1  | 2  | 3  | 0 | 0 | 0 |
| Tprg       | -3.80246 | 4.745691 | 6.662877 | 0.009844187 | 1           | 5  | 1  | 0  | 0  | 0 | 0 | 0 |
| Gm16351    | -3.79995 | 0.20869  | 5.406435 | 0.020062645 | 1           | 0  | 2  | 1  | 3  | 0 | 0 | 0 |
| Gm39446    | -3.79806 | -0.42375 | 4.425709 | 0.035401405 | 1           | 1  | 2  | 1  | 2  | 0 | 0 | 0 |
| Gm35480    | -3.79561 | -0.63932 | 5.024127 | 0.02499653  | 1           | 2  | 2  | 2  | 0  | 0 | 0 | 0 |
| Al182371   | -3.79057 | -0.15446 | 5.255588 | 0.021876403 | 1           | 0  | 3  | 0  | 3  | 0 | 0 | 0 |
| Gm39819    | -3.78055 | -0.70216 | 4.243172 | 0.039408483 | 1           | 2  | 3  | 1  | 0  | 0 | 0 | 0 |
| LOC102637  | -3.76973 | -0.43977 | 4.390239 | 0.036145236 | 1           | 1  | 4  | 0  | 1  | 0 | 0 | 0 |
| Gm40011    | -3.58126 | -0.81059 | 4.047228 | 0.044243931 | 1           | 3  | 0  | 1  | 1  | 0 | 0 | 0 |
| Gm35887    | -3.58022 | 0.684465 | 4.587973 | 0.032197065 | 1           | 0  | 0  | 0  | 5  | 0 | 0 | 0 |
| AU040972   | -3.57459 | 0.228368 | 4.591196 | 0.032136585 | 1           | 1  | 0  | 2  | 2  | 0 | 0 | 0 |
| Lrrc66     | -3.57129 | 0.097865 | 3.985792 | 0.045885527 | 1           | 0  | 0  | 5  | 0  | 0 | 0 | 0 |
| Siglecg    | -3.56961 | 0.954649 | 5.075461 | 0.024266824 | 1           | 5  | 0  | 0  | 0  | 0 | 0 | 0 |
| Axdnd1     | -3.56747 | 0.407218 | 4.692003 | 0.030303295 | 1           | 0  | 0  | 5  | 0  | 0 | 0 | 0 |
| Gm28499    | -3.56717 | -0.84874 | 4.086564 | 0.043225426 | 1           | 0  | 1  | 1  | 3  | 0 | 0 | 0 |
| Cdca5      | -3.56497 | 1.405954 | 4.978436 | 0.02566517  | 1           | 0  | 1  | 0  | 4  | 0 | 0 | 0 |
| Il22ra2    | -3.56479 | -0.66962 | 3.915761 | 0.047835357 | 1           | 3  | 1  | 1  | 0  | 0 | 0 | 0 |
| LOC108163  | -3.56362 | 0.567928 | 4.829284 | 0.027980244 | 1           | 1  | 1  | 1  | 2  | 0 | 0 | 0 |
| Spr1a      | -3.56197 | 2.89749  | 4.294006 | 0.038246957 | 1           | 2  | 1  | 2  | 0  | 0 | 0 | 0 |
| Siah3      | -3.5619  | -0.88894 | 4.35208  | 0.036963781 | 1           | 2  | 1  | 2  | 0  | 0 | 0 | 0 |
| Gm40218    | -3.56097 | 0.419808 | 5.154291 | 0.023188995 | 1           | 1  | 1  | 2  | 1  | 0 | 0 | 0 |
| Mfsd4b5    | -3.56086 | -0.29992 | 4.112122 | 0.042576917 | 1           | 0  | 1  | 3  | 1  | 0 | 0 | 0 |
| Ltb4r1     | -3.56076 | 3.36368  | 5.416223 | 0.019950469 | 1           | 4  | 1  | 0  | 0  | 0 | 0 | 0 |
| Angptl6    | -3.55993 | -0.65306 | 4.737914 | 0.029504825 | 1           | 1  | 1  | 3  | 0  | 0 | 0 | 0 |
| Oas3       | -3.55903 | 2.306989 | 5.145891 | 0.023301451 | 1           | 0  | 1  | 4  | 0  | 0 | 0 | 0 |
| Gm5088     | -3.55755 | -0.5181  | 3.889731 | 0.048582218 | 1           | 0  | 1  | 4  | 0  | 0 | 0 | 0 |
| Krt7       | -3.55213 | 4.219524 | 5.229945 | 0.02220123  | 1           | 1  | 3  | 1  | 0  | 0 | 0 | 0 |
| Gm40688    | -3.55129 | -0.12613 | 4.0314   | 0.044660878 | 1           | 3  | 2  | 0  | 0  | 0 | 0 | 0 |
| LOC108163  | -3.55128 | -0.16232 | 4.027563 | 0.044762557 | 1           | 3  | 2  | 0  | 0  | 0 | 0 | 0 |
| Gm12657    | -3.54926 | -0.15662 | 3.863558 | 0.049345591 | 1           | 1  | 2  | 1  | 1  | 0 | 0 | 0 |
| Nek2       | -3.5477  | 1.615557 | 5.218749 | 0.022344614 | 1           | 0  | 4  | 1  | 0  | 0 | 0 | 0 |
| Rab19      | -3.54458 | 1.998027 | 5.074791 | 0.024276204 | 1           | 0  | 4  | 0  | 1  | 0 | 0 | 0 |
| Dna2       | -3.54002 | 0.362628 | 4.313756 | 0.037805412 | 1           | 1  | 3  | 0  | 1  | 0 | 0 | 0 |
| Snord47    | -3.53693 | -0.3643  | 4.108857 | 0.042659194 | 1           | 2  | 3  | 0  | 0  | 0 | 0 | 0 |
| Nhlrc4     | -3.53315 | -0.41691 | 3.880759 | 0.048842468 | 1           | 0  | 3  | 1  | 1  | 0 | 0 | 0 |
| Cyp4f17    | -3.46854 | 1.250544 | 7.699613 | 0.005523266 | 1           | 5  | 6  | 9  | 0  | 0 | 0 | 1 |
| Itk        | -3.40436 | -0.29685 | 5.581009 | 0.018156257 | 1           | 3  | 3  | 4  | 9  | 0 | 0 | 1 |
| Sugct      | -3.32621 | 0.510417 | 8.184841 | 0.004224188 | 1           | 3  | 12 | 11 | 6  | 1 | 0 | 1 |
| Gm40331    | -3.29829 | 0.495291 | 11.17273 | 0.000830083 | 0.995436053 | 10 | 11 | 7  | 15 | 2 | 1 | 0 |
| Slc5a9     | -3.27868 | 1.024795 | 4.022091 | 0.044908    | 1           | 4  | 0  | 0  | 0  | 0 | 0 | 0 |
| Aurkb      | -3.27648 | 1.354228 | 4.069575 | 0.043662253 | 1           | 3  | 0  | 1  | 0  | 0 | 0 | 0 |
| Serpine1   | -3.27032 | 0.742833 | 3.930217 | 0.047425813 | 1           | 2  | 1  | 0  | 1  | 0 | 0 | 0 |
| 281040811  | -3.26953 | 1.457286 | 3.997649 | 0.045563783 | 1           | 3  | 1  | 0  | 0  | 0 | 0 | 0 |
| Ly6g6e     | -3.26886 | 3.430459 | 4.223608 | 0.039865305 | 1           | 3  | 1  | 0  | 0  | 0 | 0 | 0 |
| Tjp3       | -3.26882 | 5.38959  | 4.435772 | 0.035193305 | 1           | 2  | 0  | 1  | 1  | 0 | 0 | 0 |
| Esrp2      | -3.26841 | 3.864091 | 4.355318 | 0.036893576 | 1           | 3  | 1  | 0  | 0  | 0 | 0 | 0 |
| Fam186b    | -3.26825 | -0.57322 | 3.909393 | 0.048016942 | 1           | 2  | 1  | 1  | 0  | 0 | 0 | 0 |
| C330021F2  | -3.25063 | 0.5688   | 3.924088 | 0.047599012 | 1           | 0  | 3  | 0  | 1  | 0 | 0 | 0 |
| Dlx5       | -3.24057 | 1.659695 | 3.908692 | 0.048036957 | 1           | 0  | 4  | 0  | 0  | 0 | 0 | 0 |
| Manba      | -3.23481 | 0.352846 | 4.920287 | 0.026543114 | 1           | 1  | 4  | 3  | 8  | 0 | 1 | 0 |
| Ggt1       | -3.09647 | 0.168459 | 4.297171 | 0.038175825 | 1           | 5  | 4  | 6  | 0  | 1 | 0 | 0 |
| Zbtb8b     | -3.00282 | 3.562539 | 9.005191 | 0.002692139 | 1           | 4  | 5  | 4  | 1  | 1 | 0 | 0 |
| Rps15a-ps1 | -2.9896  | 1.076862 | 7.729705 | 0.005431963 | 1           | 4  | 5  | 3  | 2  | 0 | 0 | 1 |
| Gm17634    | -2.89407 | 3.678103 | 8.285566 | 0.003996144 | 1           | 0  | 8  | 5  | 0  | 1 | 0 | 0 |
| Acr        | -2.82633 | 0.238746 | 6.057708 | 0.013845731 | 1           | 3  | 11 | 3  | 6  | 0 | 0 | 2 |
| Amd2       | -2.82307 | 1.39359  | 9.08137  | 0.002582266 | 1           | 7  | 5  | 9  | 10 | 3 | 0 | 0 |
| Gm14719    | -2.81004 | 1.045048 | 7.368179 | 0.006638815 | 1           | 13 | 7  | 6  | 13 | 2 | 2 | 0 |



|           |          |          |           |             |             |    |    |    |    |    |    |   |
|-----------|----------|----------|-----------|-------------|-------------|----|----|----|----|----|----|---|
| Ankrd61   | -2.77624 | 0.443468 | 4.040303  | 0.044425846 | 1           | 2  | 9  | 0  | 1  | 0  | 1  | 0 |
| Exph5     | -2.7705  | 6.814736 | 12.62796  | 0.000380019 | 0.683578819 | 3  | 7  | 8  | 3  | 0  | 0  | 2 |
| Gm41848   | -2.76724 | -0.22248 | 5.101217  | 0.023909058 | 1           | 1  | 4  | 3  | 12 | 0  | 2  | 0 |
| Gm41640   | -2.69198 | 0.17489  | 3.844162  | 0.049919467 | 1           | 3  | 1  | 0  | 7  | 1  | 0  | 0 |
| Lockd     | -2.67683 | 1.93723  | 4.856956  | 0.027534868 | 1           | 1  | 5  | 1  | 4  | 0  | 1  | 0 |
| 1810044Dl | -2.67663 | 0.645088 | 4.838061  | 0.027838172 | 1           | 1  | 2  | 3  | 5  | 1  | 0  | 0 |
| 6530403Hl | -2.66865 | -0.04598 | 4.445786  | 0.034987477 | 1           | 1  | 6  | 4  | 9  | 1  | 0  | 1 |
| Cbln3     | -2.6642  | 2.429944 | 6.353366  | 0.011715879 | 1           | 2  | 5  | 4  | 0  | 1  | 0  | 0 |
| Ccl7      | -2.65532 | -0.24872 | 4.899334  | 0.026867055 | 1           | 5  | 2  | 3  | 1  | 0  | 0  | 1 |
| Gm19522   | -2.62512 | 0.795671 | 5.020398  | 0.025050413 | 1           | 8  | 6  | 1  | 4  | 0  | 1  | 1 |
| Gm26666   | -2.61021 | -0.19399 | 5.52851   | 0.018709035 | 1           | 7  | 2  | 5  | 4  | 0  | 2  | 0 |
| D330045A  | -2.58485 | 0.024358 | 6.687978  | 0.009706521 | 1           | 6  | 10 | 3  | 8  | 0  | 1  | 2 |
| BC020402  | -2.5335  | 0.613327 | 4.24379   | 0.039394142 | 1           | 2  | 4  | 2  | 10 | 1  | 0  | 1 |
| Gm5621    | -2.52264 | -0.3447  | 3.877304  | 0.048943087 | 1           | 1  | 5  | 0  | 4  | 1  | 0  | 0 |
| Alox5     | -2.49914 | 1.031994 | 4.544018  | 0.033033966 | 1           | 3  | 8  | 4  | 2  | 0  | 2  | 0 |
| 2610316Dl | -2.46082 | -0.07449 | 4.571924  | 0.032500048 | 1           | 10 | 3  | 1  | 3  | 1  | 0  | 1 |
| Gm26519   | -2.45608 | -0.28855 | 6.4807322 | 0.024101383 | 1           | 5  | 5  | 4  | 9  | 0  | 3  | 0 |
| Casc5     | -2.39935 | 3.866924 | 4.676107  | 0.030584988 | 1           | 3  | 3  | 0  | 3  | 0  | 1  | 0 |
| Mirt1     | -2.39895 | 2.66862  | 5.773073  | 0.016273552 | 1           | 1  | 2  | 6  | 7  | 0  | 1  | 1 |
| Aldh1a7   | -2.39695 | 2.775294 | 14.76327  | 0.000121886 | 0.398635001 | 19 | 14 | 20 | 13 | 3  | 2  | 4 |
| Gm30635   | -2.39398 | 2.281977 | 4.153612  | 0.041545821 | 1           | 9  | 0  | 0  | 0  | 0  | 0  | 1 |
| Mylk3     | -2.3929  | 1.224301 | 6.148315  | 0.01315374  | 1           | 8  | 1  | 3  | 4  | 1  | 0  | 1 |
| Gm42307   | -2.38928 | 1.646967 | 4.019953  | 0.044964977 | 1           | 2  | 1  | 0  | 6  | 0  | 0  | 1 |
| Gm33474   | -2.34369 | 0.353908 | 6.480025  | 0.010909348 | 1           | 7  | 4  | 9  | 8  | 1  | 3  | 0 |
| E230013L2 | -2.33354 | -0.1395  | 5.690205  | 0.01705986  | 1           | 1  | 7  | 9  | 5  | 2  | 1  | 0 |
| Lrrd1     | -2.32855 | 0.213479 | 4.333697  | 0.037365011 | 1           | 9  | 6  | 1  | 6  | 3  | 0  | 0 |
| Nupr1l    | -2.28002 | 1.53297  | 5.632046  | 0.017635039 | 1           | 2  | 3  | 7  | 3  | 0  | 0  | 2 |
| Comp      | -2.24836 | -0.06977 | 5.163162  | 0.023070864 | 1           | 5  | 9  | 5  | 8  | 3  | 1  | 0 |
| Prss27    | -2.23285 | 8.251604 | 4.281141  | 0.038537463 | 1           | 3  | 2  | 2  | 1  | 1  | 0  | 0 |
| Gm7967    | -2.21565 | 0.435726 | 6.084581  | 0.013636667 | 1           | 23 | 5  | 4  | 7  | 3  | 1  | 2 |
| Ephx3     | -2.20817 | 5.112202 | 6.76222   | 0.009310783 | 1           | 3  | 2  | 2  | 7  | 0  | 2  | 0 |
| Gm16630   | -2.13793 | 0.73784  | 4.515899  | 0.033581239 | 1           | 6  | 8  | 9  | 13 | 4  | 2  | 0 |
| LOC10816  | -2.13778 | 3.317434 | 4.028387  | 0.044740697 | 1           | 5  | 3  | 0  | 5  | 0  | 2  | 0 |
| Dusp6     | -2.132   | 1.583178 | 7.156863  | 0.00746777  | 1           | 5  | 5  | 11 | 10 | 2  | 1  | 2 |
| Gm12174   | -2.12597 | 1.050669 | 5.953985  | 0.014684058 | 1           | 2  | 4  | 1  | 12 | 1  | 1  | 1 |
| Gm16116   | -2.11016 | 0.655398 | 4.954771  | 0.026018764 | 1           | 5  | 7  | 4  | 3  | 3  | 0  | 0 |
| Pnlip     | -2.10884 | 0.622635 | 7.63576   | 0.005722226 | 1           | 10 | 7  | 17 | 7  | 2  | 4  | 1 |
| Wdr89     | -2.07734 | 1.29668  | 7.869552  | 0.005027409 | 1           | 5  | 8  | 8  | 15 | 3  | 0  | 3 |
| Inhbb     | -2.04936 | 1.521087 | 5.163457  | 0.023066939 | 1           | 4  | 5  | 9  | 0  | 2  | 1  | 0 |
| Meox2     | -2.0455  | 0.472104 | 4.250219  | 0.039245261 | 1           | 7  | 10 | 5  | 12 | 2  | 3  | 1 |
| Egfl6     | -2.03491 | 2.78056  | 6.620662  | 0.010080237 | 1           | 3  | 2  | 8  | 5  | 0  | 0  | 3 |
| Gm38859   | -2.02556 | 1.723888 | 5.089402  | 0.024072486 | 1           | 3  | 2  | 13 | 6  | 0  | 0  | 4 |
| Gm32643   | -2.00694 | 0.956961 | 4.179134  | 0.040924617 | 1           | 6  | 7  | 1  | 13 | 1  | 4  | 0 |
| Pomc      | -2.00662 | 1.976977 | 5.334094  | 0.020912213 | 1           | 96 | 47 | 18 | 5  | 11 | 13 | 7 |
| 2900092D  | -1.98753 | 2.570726 | 4.765565  | 0.029034531 | 1           | 6  | 1  | 1  | 14 | 3  | 1  | 0 |
| Gm38462   | -1.98256 | 0.594844 | 5.696525  | 0.016998536 | 1           | 12 | 5  | 10 | 1  | 2  | 1  | 2 |
| Alox12    | -1.96882 | 4.279872 | 6.881315  | 0.008710145 | 1           | 9  | 1  | 5  | 2  | 1  | 2  | 0 |
| Bco1      | -1.88694 | 2.700299 | 5.153923  | 0.023193916 | 1           | 4  | 2  | 0  | 10 | 1  | 1  | 1 |
| Gm42005   | -1.88162 | 2.92866  | 7.60206   | 0.005830164 | 1           | 8  | 7  | 4  | 7  | 0  | 2  | 3 |
| Il31ra    | -1.87333 | 1.89955  | 14.48794  | 0.00014106  | 0.422897549 | 22 | 58 | 31 | 34 | 13 | 9  | 7 |
| 4732471J0 | -1.87259 | 1.305897 | 5.111529  | 0.023767363 | 1           | 11 | 21 | 18 | 4  | 3  | 0  | 7 |
| Tmem510c  | -1.81517 | 3.256104 | 9.324106  | 0.002261586 | 1           | 14 | 4  | 10 | 15 | 6  | 2  | 1 |
| Cdca7l    | -1.8077  | 2.440866 | 4.49663   | 0.033961724 | 1           | 5  | 4  | 4  | 2  | 0  | 3  | 0 |
| 22104040  | -1.77849 | 1.922205 | 6.907243  | 0.008584728 | 1           | 5  | 14 | 4  | 14 | 2  | 6  | 0 |
| Zfp493    | -1.7313  | 0.976316 | 5.562614  | 0.018348    | 1           | 7  | 7  | 8  | 10 | 0  | 4  | 3 |
| Gm31504   | -1.71544 | 1.726195 | 5.536215  | 0.018626832 | 1           | 5  | 9  | 2  | 16 | 6  | 0  | 1 |
| BC029722  | -1.71174 | 0.72852  | 4.641528  | 0.031207212 | 1           | 17 | 10 | 11 | 6  | 5  | 4  | 1 |
| Tacstd2   | -1.69212 | 8.937077 | 4.716005  | 0.029883085 | 1           | 1  | 4  | 4  | 5  | 1  | 1  | 1 |
| Irs3      | -1.66949 | 0.328013 | 4.770403  | 0.028953055 | 1           | 10 | 12 | 6  | 3  | 0  | 4  | 3 |
| E2f8      | -1.66265 | 2.362584 | 5.050539  | 0.02461828  | 1           | 4  | 11 | 2  | 5  | 1  | 4  | 0 |
| Bik       | -1.65808 | 3.449757 | 4.578587  | 0.032373899 | 1           | 1  | 12 | 3  | 2  | 2  | 2  | 0 |
| Gcnt1     | -1.63956 | 0.811083 | 4.313521  | 0.037810618 | 1           | 11 | 5  | 13 | 13 | 7  | 2  | 1 |
| Anxa1     | -1.62766 | 7.461816 | 13.15167  | 0.000287263 | 0.586926344 | 9  | 16 | 11 | 19 | 6  | 2  | 5 |
| Rassf6    | -1.58614 | 2.860405 | 11.80876  | 0.000589526 | 0.790364922 | 4  | 10 | 27 | 16 | 5  | 5  | 4 |
| Glt28d2   | -1.58564 | 3.914447 | 4.889732  | 0.027016879 | 1           | 10 | 4  | 1  | 2  | 3  | 0  | 1 |
| Sox21     | -1.58504 | 4.707051 | 3.931282  | 0.047395814 | 1           | 4  | 2  | 3  | 4  | 0  | 0  | 3 |

|            |          |          |          |             |             |     |      |      |      |     |     |     |
|------------|----------|----------|----------|-------------|-------------|-----|------|------|------|-----|-----|-----|
| Lck        | -1.56978 | 0.581034 | 4.564789 | 0.032635702 | 1           | 7   | 12   | 7    | 10   | 5   | 4   | 0   |
| 4930550C:  | -1.49452 | 3.019424 | 6.187635 | 0.012864601 | 1           | 15  | 12   | 1    | 3    | 0   | 5   | 3   |
| Pkd1l3     | -1.49171 | 1.21031  | 4.028857 | 0.044728244 | 1           | 5   | 10   | 10   | 3    | 2   | 1   | 4   |
| Rab10os    | -1.48839 | 2.103433 | 5.958445 | 0.01464695  | 1           | 5   | 14   | 10   | 16   | 4   | 7   | 1   |
| Hcar1      | -1.48287 | 2.060363 | 6.007244 | 0.014247259 | 1           | 4   | 17   | 7    | 6    | 1   | 8   | 0   |
| Ifi44      | -1.47867 | 2.580444 | 5.08964  | 0.024069192 | 1           | 16  | 21   | 17   | 19   | 11  | 9   | 0   |
| Foxm1      | -1.46127 | 2.883943 | 5.289845 | 0.021450124 | 1           | 6   | 7    | 10   | 4    | 3   | 0   | 4   |
| Il17re     | -1.45908 | 5.902536 | 13.11041 | 0.000293659 | 0.586926344 | 6   | 16   | 20   | 14   | 2   | 7   | 6   |
| Mettl15    | -1.44369 | 1.637869 | 4.332623 | 0.03738859  | 1           | 17  | 8    | 8    | 10   | 2   | 8   | 2   |
| Nrg4       | -1.44249 | 1.176759 | 4.933397 | 0.026342485 | 1           | 5   | 17   | 6    | 9    | 4   | 5   | 1   |
| Serp1nb1b  | -1.44065 | 1.021892 | 6.474925 | 0.01094069  | 1           | 16  | 9    | 17   | 24   | 9   | 4   | 5   |
| LOC10816i  | -1.40326 | 1.933142 | 4.749081 | 0.029313946 | 1           | 11  | 6    | 7    | 15   | 0   | 7   | 4   |
| Myadml2    | -1.37749 | 1.084744 | 4.946196 | 0.026148139 | 1           | 12  | 18   | 27   | 8    | 6   | 4   | 8   |
| Zkscan7    | -1.3769  | 1.974751 | 4.765977 | 0.029027573 | 1           | 9   | 19   | 7    | 15   | 4   | 5   | 5   |
| Kcng2      | -1.33341 | 1.986629 | 7.762503 | 0.0053342   | 1           | 41  | 28   | 27   | 22   | 15  | 12  | 8   |
| Suv39h2    | -1.33217 | 1.307579 | 4.692155 | 0.030300623 | 1           | 7   | 20   | 17   | 7    | 2   | 9   | 4   |
| Myh8       | -1.31467 | 2.129157 | 4.332715 | 0.03738656  | 1           | 63  | 28   | 37   | 82   | 16  | 23  | 24  |
| Exo5       | -1.3124  | 2.551651 | 6.670868 | 0.009800144 | 1           | 23  | 15   | 18   | 14   | 15  | 4   | 2   |
| Gstt2      | -1.29991 | 3.133711 | 9.256816 | 0.002346206 | 1           | 18  | 18   | 24   | 22   | 6   | 13  | 6   |
| Slc52a3    | -1.28499 | 2.948697 | 5.182571 | 0.022814537 | 1           | 8   | 11   | 2    | 12   | 6   | 4   | 0   |
| Wfdc2      | -1.27653 | 5.527928 | 9.239578 | 0.002368395 | 1           | 8   | 25   | 11   | 12   | 9   | 5   | 3   |
| Epha2      | -1.27194 | 3.92415  | 4.294786 | 0.038229401 | 1           | 6   | 2    | 5    | 10   | 1   | 5   | 1   |
| Nt5dc1     | -1.24937 | 3.667024 | 6.340626 | 0.011800323 | 1           | 19  | 9    | 8    | 9    | 7   | 4   | 3   |
| Pblid2     | -1.23526 | 1.744739 | 5.263191 | 0.02178105  | 1           | 12  | 12   | 16   | 17   | 6   | 7   | 5   |
| Gpr83      | -1.21036 | 1.177767 | 6.77596  | 0.00923938  | 1           | 16  | 12   | 11   | 11   | 4   | 7   | 5   |
| Grm5       | -1.20032 | 1.253489 | 4.041067 | 0.044405745 | 1           | 9   | 23   | 29   | 19   | 9   | 11  | 6   |
| Emilin2    | -1.19878 | 0.439639 | 3.933811 | 0.047324577 | 1           | 9   | 8    | 13   | 12   | 5   | 9   | 0   |
| Stxbp2     | -1.19202 | 5.353611 | 14.10979 | 0.000172444 | 0.477219405 | 29  | 21   | 30   | 22   | 12  | 7   | 14  |
| Cysltr2    | -1.15477 | 1.021614 | 4.33869  | 0.037255572 | 1           | 25  | 21   | 13   | 24   | 5   | 8   | 14  |
| St6galnac2 | -1.14919 | 4.566285 | 4.074157 | 0.043543977 | 1           | 19  | 14   | 4    | 14   | 6   | 6   | 5   |
| Bhlhe22    | -1.13011 | 1.232983 | 4.493676 | 0.034020446 | 1           | 16  | 24   | 12   | 24   | 8   | 12  | 6   |
| Zfp58      | -1.12131 | 2.065138 | 5.974753 | 0.014512118 | 1           | 21  | 15   | 18   | 27   | 9   | 12  | 7   |
| Sh3bp1     | -1.09954 | 5.003232 | 4.841959 | 0.027775322 | 1           | 10  | 11   | 4    | 10   | 2   | 5   | 5   |
| Fgfr3      | -1.0969  | 4.611079 | 6.577473 | 0.010327739 | 1           | 14  | 17   | 11   | 22   | 3   | 8   | 11  |
| Zfp141     | -1.08944 | 2.99654  | 10.107   | 0.001477074 | 1           | 28  | 36   | 29   | 21   | 18  | 15  | 7   |
| Apoc1      | -1.08913 | 4.494316 | 4.972464 | 0.025753936 | 1           | 15  | 11   | 9    | 16   | 4   | 10  | 4   |
| Nup98      | -1.08401 | 2.946886 | 8.048549 | 0.004554012 | 1           | 37  | 36   | 21   | 26   | 18  | 21  | 4   |
| Tmem38b    | -1.08105 | 2.034634 | 6.444565 | 0.031152039 | 1           | 21  | 20   | 20   | 30   | 4   | 15  | 13  |
| Gm26782    | -1.07166 | 1.659132 | 5.504025 | 0.01897276  | 1           | 13  | 34   | 35   | 17   | 11  | 15  | 9   |
| Slco1c1    | -1.0652  | 1.650924 | 4.086291 | 0.043232412 | 1           | 30  | 23   | 26   | 31   | 20  | 9   | 10  |
| Gm16364    | -1.05299 | 2.61806  | 9.503199 | 0.00205114  | 1           | 48  | 33   | 61   | 43   | 19  | 21  | 26  |
| AW146154   | -1.05255 | 3.321814 | 6.025104 | 0.014103803 | 1           | 19  | 19   | 14   | 7    | 6   | 8   | 7   |
| Alas2      | -1.04328 | 3.536979 | 4.37279  | 0.036517147 | 1           | 123 | 25   | 63   | 54   | 41  | 34  | 23  |
| 4930412C:  | -1.03733 | 2.372258 | 4.534179 | 0.03322439  | 1           | 23  | 40   | 28   | 26   | 12  | 16  | 14  |
| Hook1      | -1.00839 | 4.352153 | 5.07515  | 0.024271169 | 1           | 14  | 38   | 13   | 21   | 15  | 6   | 10  |
| Exosc9     | -0.98535 | 2.415114 | 4.785293 | 0.028703765 | 1           | 26  | 32   | 28   | 17   | 10  | 19  | 10  |
| Nlrx1      | -0.98006 | 4.241951 | 13.21278 | 0.000278046 | 0.586926344 | 48  | 35   | 54   | 73   | 27  | 30  | 23  |
| Rft1       | -0.98003 | 4.147262 | 15.89962 | 6.67922E-05 | 0.240291733 | 76  | 68   | 55   | 63   | 32  | 36  | 31  |
| Chst5      | -0.96751 | 4.764522 | 5.966872 | 0.01457712  | 1           | 26  | 17   | 23   | 10   | 7   | 13  | 9   |
| Ubl7       | -0.96637 | 3.883667 | 7.018363 | 0.008067797 | 1           | 56  | 45   | 66   | 107  | 35  | 52  | 21  |
| Fam228b    | -0.96012 | 2.094779 | 4.004886 | 0.045368571 | 1           | 15  | 14   | 20   | 18   | 11  | 11  | 4   |
| Slc7a6os   | -0.95135 | 4.042812 | 9.879623 | 0.001671192 | 1           | 87  | 77   | 56   | 59   | 35  | 43  | 30  |
| Postn      | -0.94727 | 3.213799 | 4.197074 | 0.040493792 | 1           | 38  | 26   | 18   | 40   | 18  | 20  | 10  |
| Preli2     | -0.93873 | 1.643032 | 3.988544 | 0.045810634 | 1           | 9   | 15   | 15   | 15   | 9   | 8   | 4   |
| Bbs9       | -0.93064 | 3.162742 | 8.55224  | 0.003450973 | 1           | 49  | 64   | 53   | 41   | 32  | 16  | 31  |
| Cd59a      | -0.92698 | 7.789429 | 26.91346 | 2.12772E-07 | 0.002551565 | 911 | 1754 | 1902 | 1722 | 782 | 962 | 726 |
| Chac1      | -0.90506 | 5.309371 | 4.213875 | 0.040094638 | 1           | 29  | 15   | 13   | 8    | 9   | 11  | 6   |
| Pex2       | -0.89802 | 3.427533 | 4.018358 | 0.045007523 | 1           | 25  | 27   | 23   | 40   | 14  | 11  | 20  |
| Omp        | -0.8788  | 4.77433  | 6.456049 | 0.011057525 | 1           | 33  | 20   | 22   | 17   | 18  | 7   | 12  |
| Tmem72     | -0.87853 | 3.713056 | 3.975331 | 0.046171369 | 1           | 115 | 129  | 57   | 93   | 50  | 51  | 56  |
| Acad10     | -0.87827 | 2.695248 | 3.953012 | 0.046787539 | 1           | 10  | 30   | 9    | 11   | 7   | 10  | 7   |
| Prokr2     | -0.86084 | 2.783888 | 8.337973 | 0.00388249  | 1           | 61  | 50   | 71   | 54   | 40  | 43  | 16  |
| Sh3bp4     | -0.84995 | 3.839159 | 5.570031 | 0.018270434 | 1           | 54  | 38   | 50   | 33   | 32  | 25  | 16  |
| Pprc1      | -0.82823 | 3.133513 | 5.289594 | 0.021453217 | 1           | 46  | 38   | 22   | 33   | 25  | 23  | 11  |
| Zc3h12b    | -0.82699 | 2.689486 | 5.375078 | 0.020426424 | 1           | 41  | 32   | 48   | 41   | 25  | 28  | 16  |
| Gabra4     | -0.8249  | 1.879528 | 4.396158 | 0.036019983 | 1           | 34  | 30   | 21   | 18   | 15  | 14  | 14  |

|           |          |          |          |             |             |     |     |     |     |     |     |     |
|-----------|----------|----------|----------|-------------|-------------|-----|-----|-----|-----|-----|-----|-----|
| Iqcc      | -0.81785 | 2.366249 | 4.571451 | 0.032509016 | 1           | 47  | 27  | 24  | 23  | 15  | 25  | 12  |
| Snap23    | -0.80482 | 5.044379 | 8.925604 | 0.002812004 | 1           | 74  | 48  | 29  | 34  | 24  | 30  | 25  |
| Smco4     | -0.80325 | 4.947632 | 6.82545  | 0.008986791 | 1           | 38  | 31  | 20  | 26  | 16  | 17  | 16  |
| Sh2b3     | -0.80113 | 3.620537 | 5.14093  | 0.023368121 | 1           | 28  | 41  | 17  | 38  | 23  | 10  | 19  |
| Tor3a     | -0.79078 | 4.785847 | 6.669296 | 0.009808791 | 1           | 28  | 23  | 22  | 23  | 12  | 10  | 19  |
| 2010315Bt | -0.79068 | 3.722347 | 5.053238 | 0.02457996  | 1           | 55  | 22  | 45  | 49  | 19  | 34  | 22  |
| Xpo4      | -0.78353 | 3.225894 | 4.107998 | 0.042680859 | 1           | 37  | 32  | 36  | 38  | 19  | 17  | 25  |
| Cx3cl1    | -0.77624 | 4.23381  | 5.684512 | 0.017115297 | 1           | 26  | 27  | 16  | 21  | 17  | 11  | 11  |
| Alg12     | -0.77035 | 3.05238  | 5.204892 | 0.022523408 | 1           | 42  | 32  | 29  | 48  | 30  | 18  | 18  |
| F2rl2     | -0.74711 | 3.488762 | 11.43885 | 0.000719244 | 0.923024417 | 92  | 102 | 89  | 99  | 50  | 54  | 64  |
| Tlr4      | -0.74418 | 4.356785 | 5.512606 | 0.018879896 | 1           | 34  | 28  | 15  | 19  | 7   | 24  | 12  |
| Rars2     | -0.74004 | 4.278673 | 5.572374 | 0.018246005 | 1           | 58  | 58  | 40  | 39  | 36  | 29  | 22  |
| Map2k6    | -0.72665 | 4.216207 | 4.989766 | 0.025497658 | 1           | 112 | 107 | 111 | 108 | 75  | 59  | 62  |
| Cbr3      | -0.72397 | 3.956789 | 4.587383 | 0.032208156 | 1           | 30  | 41  | 22  | 36  | 23  | 19  | 16  |
| Osmr      | -0.71136 | 4.655322 | 4.536705 | 0.033175394 | 1           | 33  | 27  | 31  | 27  | 4   | 29  | 21  |
| Atf1      | -0.70632 | 4.437888 | 8.183971 | 0.004226214 | 1           | 51  | 37  | 44  | 42  | 21  | 35  | 24  |
| Helb      | -0.68974 | 3.692853 | 5.645698 | 0.017498248 | 1           | 25  | 42  | 40  | 29  | 23  | 25  | 15  |
| Fkbp14    | -0.6884  | 3.661387 | 8.430791 | 0.003689198 | 1           | 63  | 94  | 55  | 59  | 44  | 46  | 35  |
| Dclre1a   | -0.6836  | 3.780647 | 4.104238 | 0.04277586  | 1           | 38  | 29  | 30  | 48  | 23  | 27  | 18  |
| Mir6236   | -0.68328 | 4.870337 | 4.434618 | 0.035217101 | 1           | 124 | 53  | 87  | 122 | 68  | 60  | 53  |
| Atp7a     | -0.6769  | 4.422458 | 6.579729 | 0.01031466  | 1           | 87  | 103 | 107 | 68  | 27  | 91  | 54  |
| Casp3     | -0.67502 | 4.409096 | 7.644874 | 0.005693386 | 1           | 51  | 67  | 75  | 64  | 46  | 33  | 40  |
| Vwa9      | -0.67269 | 3.28593  | 5.217233 | 0.022364111 | 1           | 33  | 47  | 32  | 38  | 25  | 25  | 20  |
| Trim30a   | -0.64866 | 4.566332 | 3.912012 | 0.047942175 | 1           | 30  | 33  | 12  | 20  | 14  | 17  | 14  |
| Akt1s1    | -0.64426 | 4.485446 | 3.980441 | 0.04603152  | 1           | 107 | 78  | 81  | 102 | 61  | 71  | 46  |
| Eif2ak2   | -0.64298 | 4.689727 | 9.55351  | 0.001995674 | 1           | 92  | 93  | 79  | 65  | 55  | 56  | 46  |
| Dhdh      | -0.63475 | 3.122685 | 4.838708 | 0.027827735 | 1           | 58  | 68  | 69  | 45  | 37  | 49  | 30  |
| Pqlc3     | -0.63262 | 4.62937  | 6.879276 | 0.008720088 | 1           | 76  | 119 | 93  | 106 | 70  | 71  | 49  |
| Homer1    | -0.6299  | 4.709511 | 11.04058 | 0.00089139  | 1           | 136 | 169 | 142 | 141 | 92  | 117 | 76  |
| Lurap1l   | -0.62504 | 3.638059 | 4.010244 | 0.045224618 | 1           | 69  | 63  | 76  | 83  | 43  | 58  | 41  |
| Wtip      | -0.62458 | 3.879157 | 4.80902  | 0.028311149 | 1           | 41  | 48  | 49  | 65  | 40  | 36  | 23  |
| Edrf1     | -0.61344 | 4.237716 | 6.458607 | 0.011041614 | 1           | 58  | 65  | 57  | 55  | 36  | 47  | 32  |
| Ankrd29   | -0.60777 | 4.811393 | 6.889609 | 0.008669823 | 1           | 138 | 135 | 135 | 143 | 78  | 89  | 100 |
| Ints2     | -0.60637 | 3.817984 | 4.411603 | 0.035695284 | 1           | 34  | 44  | 39  | 66  | 28  | 35  | 27  |
| Redrum    | -0.60172 | 3.004106 | 4.040193 | 0.044428741 | 1           | 42  | 93  | 61  | 66  | 45  | 58  | 27  |
| Galnt5    | -0.59382 | 3.756675 | 4.855579 | 0.027556861 | 1           | 99  | 118 | 118 | 112 | 71  | 109 | 46  |
| Alpl      | -0.59018 | 5.654889 | 4.76163  | 0.029100984 | 1           | 31  | 62  | 68  | 44  | 37  | 41  | 24  |
| Mcc       | -0.57965 | 3.662587 | 3.97229  | 0.046254827 | 1           | 34  | 41  | 35  | 44  | 17  | 34  | 26  |
| Ccdc80    | -0.57865 | 4.640429 | 4.21147  | 0.040151517 | 1           | 76  | 98  | 105 | 84  | 62  | 81  | 41  |
| Pim1      | -0.5728  | 7.284081 | 7.175167 | 0.007391959 | 1           | 63  | 82  | 77  | 90  | 38  | 61  | 57  |
| Utp14a    | -0.56581 | 4.551139 | 5.684495 | 0.017115469 | 1           | 85  | 60  | 61  | 76  | 48  | 54  | 41  |
| Kansl1l   | -0.55481 | 4.738701 | 5.692947 | 0.017033226 | 1           | 104 | 124 | 83  | 82  | 86  | 57  | 55  |
| Fbxl19    | -0.55146 | 4.945276 | 8.305117 | 0.003953354 | 1           | 107 | 107 | 103 | 91  | 76  | 67  | 64  |
| Fn3krp    | -0.54879 | 4.093755 | 4.175152 | 0.041020876 | 1           | 93  | 48  | 79  | 64  | 69  | 43  | 34  |
| Fam76b    | -0.54617 | 4.784033 | 5.170765 | 0.022970095 | 1           | 68  | 64  | 41  | 59  | 34  | 50  | 35  |
| Lypd2     | -0.53936 | 11.45805 | 4.126255 | 0.042222698 | 1           | 18  | 30  | 30  | 35  | 14  | 24  | 20  |
| 2310009Al | -0.53417 | 4.466847 | 3.938604 | 0.047189919 | 1           | 94  | 121 | 57  | 65  | 50  | 60  | 61  |
| Phactr3   | -0.5323  | 3.959448 | 5.065808 | 0.024402327 | 1           | 149 | 146 | 93  | 121 | 88  | 121 | 58  |
| Rcor3     | -0.53126 | 5.344886 | 8.414947 | 0.003721486 | 1           | 117 | 147 | 109 | 162 | 110 | 96  | 71  |
| Afmid     | -0.52856 | 4.262801 | 3.9525   | 0.046801791 | 1           | 39  | 49  | 51  | 56  | 28  | 48  | 26  |
| lft122    | -0.5225  | 5.417044 | 4.243873 | 0.039392213 | 1           | 269 | 249 | 138 | 169 | 135 | 188 | 110 |
| Ccng1     | -0.52027 | 5.886056 | 12.11272 | 0.000500791 | 0.720657938 | 258 | 301 | 256 | 245 | 172 | 205 | 173 |
| 1810026J2 | -0.51604 | 4.317069 | 4.421813 | 0.035482311 | 1           | 67  | 95  | 100 | 100 | 69  | 84  | 39  |
| Nmi       | -0.51009 | 5.123965 | 4.613214 | 0.031726521 | 1           | 62  | 48  | 45  | 58  | 30  | 54  | 29  |
| Rpf1      | -0.5066  | 4.299049 | 4.464047 | 0.034615385 | 1           | 44  | 62  | 45  | 43  | 30  | 43  | 29  |
| Cdh4      | -0.50457 | 4.914584 | 4.197739 | 0.04047792  | 1           | 126 | 119 | 161 | 139 | 99  | 111 | 79  |
| Lrrn3     | -0.49823 | 3.814055 | 4.421435 | 0.035490173 | 1           | 111 | 117 | 113 | 90  | 84  | 82  | 62  |
| Lrig2     | -0.49537 | 4.720393 | 5.953624 | 0.014687063 | 1           | 136 | 120 | 159 | 130 | 79  | 131 | 82  |
| Stat2     | -0.49307 | 4.801339 | 4.262466 | 0.038963317 | 1           | 129 | 112 | 135 | 172 | 96  | 133 | 68  |
| Mafb      | -0.4843  | 6.214428 | 5.013273 | 0.025153702 | 1           | 61  | 43  | 72  | 46  | 45  | 52  | 23  |
| Chrac1    | -0.48147 | 4.736376 | 3.970699 | 0.046298555 | 1           | 89  | 89  | 77  | 59  | 63  | 42  | 60  |
| Tspan9    | -0.48092 | 4.534098 | 4.8701   | 0.027325916 | 1           | 80  | 60  | 76  | 74  | 49  | 54  | 52  |
| G6pdx     | -0.47964 | 6.07466  | 6.495944 | 0.010812086 | 1           | 66  | 76  | 85  | 86  | 61  | 52  | 54  |
| Plcxd2    | -0.47755 | 5.416823 | 6.398083 | 0.011424364 | 1           | 250 | 277 | 272 | 252 | 170 | 246 | 153 |
| Tcea1     | -0.47565 | 4.23889  | 4.322081 | 0.037620888 | 1           | 65  | 107 | 45  | 62  | 57  | 60  | 33  |
| Ugcg      | -0.47322 | 4.522355 | 4.023595 | 0.044867987 | 1           | 171 | 168 | 196 | 180 | 144 | 127 | 113 |

|            |          |          |          |             |   |      |      |      |      |     |      |     |
|------------|----------|----------|----------|-------------|---|------|------|------|------|-----|------|-----|
| Smc2       | -0.47211 | 5.310422 | 4.289378 | 0.038351183 | 1 | 84   | 84   | 77   | 79   | 56  | 50   | 66  |
| Zfp503     | -0.46985 | 4.660813 | 6.281907 | 0.01219768  | 1 | 112  | 143  | 124  | 121  | 100 | 93   | 76  |
| D430041D   | -0.46896 | 4.602004 | 7.419083 | 0.00645357  | 1 | 237  | 266  | 216  | 264  | 172 | 177  | 177 |
| Rhno1      | -0.46722 | 4.329777 | 4.01923  | 0.044984257 | 1 | 58   | 74   | 77   | 68   | 39  | 51   | 58  |
| Agps       | -0.46539 | 5.073022 | 4.045709 | 0.044283774 | 1 | 120  | 133  | 126  | 121  | 91  | 98   | 81  |
| Fam129a    | -0.46493 | 5.486646 | 5.34297  | 0.020805993 | 1 | 124  | 112  | 100  | 84   | 61  | 104  | 64  |
| Csgalnact1 | -0.45934 | 5.121807 | 3.891535 | 0.048530045 | 1 | 136  | 159  | 142  | 140  | 96  | 136  | 84  |
| Palm2      | -0.45758 | 5.389155 | 4.533008 | 0.033247132 | 1 | 253  | 296  | 287  | 356  | 186 | 303  | 170 |
| Lingo2     | -0.45669 | 4.033707 | 4.954959 | 0.026015947 | 1 | 120  | 140  | 151  | 123  | 118 | 110  | 65  |
| Sema6d     | -0.44893 | 5.033145 | 6.528507 | 0.010615904 | 1 | 235  | 240  | 216  | 235  | 156 | 201  | 151 |
| Cabin1     | -0.44834 | 5.593712 | 6.251769 | 0.012406931 | 1 | 197  | 192  | 184  | 199  | 141 | 167  | 117 |
| Anks3      | -0.44632 | 4.32597  | 3.924893 | 0.047576209 | 1 | 76   | 72   | 88   | 93   | 76  | 59   | 46  |
| Nudt13     | -0.44587 | 4.354406 | 4.157488 | 0.041450828 | 1 | 57   | 58   | 42   | 60   | 36  | 46   | 37  |
| Slc43a3    | -0.4398  | 4.416045 | 6.520789 | 0.010662067 | 1 | 163  | 240  | 203  | 187  | 116 | 188  | 133 |
| Nol11      | -0.43942 | 4.792473 | 5.05363  | 0.024574407 | 1 | 84   | 96   | 95   | 82   | 81  | 75   | 42  |
| Prmt3      | -0.43732 | 4.828506 | 5.943758 | 0.014769498 | 1 | 142  | 200  | 137  | 125  | 111 | 132  | 90  |
| Prkar2a    | -0.43669 | 6.771158 | 10.95978 | 0.00093111  | 1 | 621  | 604  | 544  | 585  | 374 | 497  | 425 |
| Ercc4      | -0.43387 | 4.195948 | 5.440574 | 0.019674199 | 1 | 80   | 81   | 74   | 73   | 59  | 68   | 44  |
| Rnf115     | -0.43181 | 5.124789 | 5.266746 | 0.021736611 | 1 | 165  | 215  | 180  | 139  | 123 | 160  | 105 |
| Tbc1d10a   | -0.43064 | 5.578638 | 3.863188 | 0.049356451 | 1 | 87   | 65   | 90   | 68   | 53  | 71   | 49  |
| Gpatch1    | -0.42909 | 5.138371 | 4.135474 | 0.041993304 | 1 | 104  | 173  | 126  | 114  | 100 | 86   | 96  |
| Ints3      | -0.4283  | 4.561003 | 4.463591 | 0.034624638 | 1 | 95   | 107  | 74   | 83   | 68  | 67   | 63  |
| Gtf2a2     | -0.42766 | 5.094351 | 4.277647 | 0.038616765 | 1 | 91   | 160  | 126  | 129  | 93  | 94   | 91  |
| Tnip1      | -0.42748 | 6.209553 | 5.403518 | 0.020096209 | 1 | 400  | 314  | 382  | 412  | 241 | 378  | 232 |
| Chp2       | -0.42568 | 4.599323 | 4.322524 | 0.037611087 | 1 | 175  | 273  | 176  | 145  | 143 | 131  | 145 |
| Dkk3       | -0.42306 | 7.596362 | 4.623082 | 0.031544511 | 1 | 412  | 434  | 396  | 359  | 334 | 337  | 226 |
| Htt        | -0.4209  | 4.778634 | 4.296867 | 0.038182661 | 1 | 159  | 138  | 141  | 170  | 125 | 134  | 84  |
| Necab1     | -0.42085 | 5.409444 | 4.42457  | 0.035425029 | 1 | 237  | 218  | 228  | 183  | 160 | 183  | 141 |
| Zfp804a    | -0.42068 | 4.671708 | 6.142521 | 0.013196907 | 1 | 209  | 194  | 213  | 244  | 147 | 216  | 124 |
| Ccdc71     | -0.41232 | 5.605439 | 4.35442  | 0.036913028 | 1 | 143  | 114  | 132  | 114  | 92  | 112  | 80  |
| Slitrk5    | -0.40763 | 4.909703 | 5.431992 | 0.019771119 | 1 | 230  | 268  | 241  | 230  | 149 | 252  | 150 |
| Aacs       | -0.40613 | 5.680819 | 4.268611 | 0.038822648 | 1 | 171  | 154  | 166  | 194  | 112 | 167  | 111 |
| Bbx        | -0.40582 | 6.785675 | 6.563401 | 0.010409724 | 1 | 450  | 428  | 361  | 428  | 314 | 331  | 292 |
| Psen1      | -0.40111 | 6.487912 | 8.262769 | 0.004046635 | 1 | 189  | 250  | 202  | 182  | 145 | 170  | 148 |
| Tecpr2     | -0.39871 | 4.854346 | 4.936395 | 0.026296825 | 1 | 166  | 161  | 162  | 144  | 122 | 150  | 90  |
| Mbd3       | -0.39671 | 5.302801 | 4.617587 | 0.031645728 | 1 | 143  | 177  | 180  | 113  | 109 | 128  | 109 |
| Ncoa3      | -0.39217 | 5.617883 | 4.271589 | 0.038754677 | 1 | 93   | 106  | 82   | 103  | 76  | 83   | 60  |
| Coro7      | -0.3899  | 5.1658   | 4.309987 | 0.037889255 | 1 | 190  | 186  | 175  | 148  | 173 | 129  | 97  |
| Pcyt1b     | -0.38971 | 5.877852 | 5.939943 | 0.014801494 | 1 | 531  | 536  | 466  | 382  | 314 | 453  | 327 |
| Ccdc6      | -0.38909 | 5.551216 | 5.065682 | 0.024404103 | 1 | 132  | 133  | 137  | 164  | 117 | 136  | 74  |
| Sphkap     | -0.38797 | 6.280461 | 5.776059 | 0.01624593  | 1 | 263  | 336  | 276  | 241  | 212 | 257  | 170 |
| Wbp1l      | -0.38742 | 5.839386 | 6.113969 | 0.013411762 | 1 | 121  | 127  | 146  | 147  | 81  | 152  | 80  |
| Bnip3l     | -0.38209 | 6.80403  | 10.47038 | 0.001213036 | 1 | 289  | 336  | 339  | 297  | 232 | 258  | 230 |
| Ptptr      | -0.38182 | 5.136015 | 8.007259 | 0.004659019 | 1 | 311  | 312  | 261  | 256  | 237 | 231  | 185 |
| Irf2       | -0.37894 | 6.530685 | 4.995684 | 0.025410612 | 1 | 209  | 244  | 163  | 233  | 130 | 188  | 167 |
| Ar         | -0.37582 | 4.544513 | 4.62421  | 0.03152377  | 1 | 194  | 177  | 150  | 148  | 121 | 135  | 127 |
| Polr3g     | -0.3721  | 6.627212 | 8.100443 | 0.004425444 | 1 | 430  | 472  | 412  | 397  | 305 | 388  | 295 |
| Rab27b     | -0.37144 | 6.611819 | 8.386118 | 0.003780975 | 1 | 191  | 218  | 193  | 210  | 149 | 186  | 135 |
| Scaf4      | -0.36938 | 5.185503 | 5.398309 | 0.020156274 | 1 | 118  | 138  | 106  | 113  | 82  | 120  | 74  |
| Cttnbp2nl  | -0.3582  | 6.031163 | 5.310809 | 0.021193508 | 1 | 193  | 202  | 195  | 199  | 143 | 182  | 136 |
| Rims2      | -0.35616 | 5.295816 | 8.21907  | 0.004145244 | 1 | 288  | 347  | 313  | 313  | 209 | 286  | 239 |
| Abhd6      | -0.35331 | 5.406622 | 4.042136 | 0.044377616 | 1 | 181  | 249  | 215  | 237  | 178 | 188  | 149 |
| Eml1       | -0.34634 | 5.070892 | 4.958451 | 0.025963448 | 1 | 252  | 257  | 264  | 258  | 185 | 238  | 184 |
| Dnajb4     | -0.34629 | 5.771974 | 8.238156 | 0.004101879 | 1 | 288  | 365  | 347  | 282  | 266 | 295  | 195 |
| Ppef1      | -0.34385 | 4.917225 | 4.092034 | 0.043085762 | 1 | 293  | 263  | 248  | 245  | 210 | 247  | 165 |
| Trappc3l   | -0.34354 | 6.374618 | 5.039407 | 0.024776975 | 1 | 741  | 897  | 746  | 667  | 596 | 687  | 512 |
| Prkcd      | -0.34278 | 6.371449 | 3.90378  | 0.048177608 | 1 | 330  | 375  | 275  | 353  | 234 | 344  | 214 |
| Xrn1       | -0.33817 | 6.0592   | 5.460476 | 0.019451342 | 1 | 191  | 221  | 175  | 193  | 139 | 189  | 134 |
| Mesdc2     | -0.33721 | 5.595568 | 4.771773 | 0.028930016 | 1 | 256  | 259  | 201  | 210  | 205 | 218  | 129 |
| Hspa12a    | -0.33668 | 7.154547 | 5.776985 | 0.016237373 | 1 | 1084 | 1032 | 1052 | 1221 | 822 | 1145 | 671 |
| Gatc       | -0.33073 | 4.765705 | 4.051014 | 0.044144833 | 1 | 137  | 148  | 131  | 127  | 102 | 127  | 94  |
| Serpinb1a  | -0.33046 | 6.150062 | 5.741887 | 0.016564985 | 1 | 343  | 360  | 406  | 404  | 325 | 307  | 266 |
| Tpcn1      | -0.32992 | 6.422647 | 5.928154 | 0.014900847 | 1 | 235  | 219  | 220  | 171  | 162 | 188  | 152 |
| Grik1      | -0.32861 | 5.954786 | 4.221345 | 0.039918501 | 1 | 391  | 444  | 485  | 430  | 323 | 465  | 267 |
| Cyfp2      | -0.31601 | 7.393866 | 6.456783 | 0.011052958 | 1 | 859  | 996  | 865  | 828  | 624 | 879  | 631 |
| Tmx3       | -0.30778 | 6.709941 | 7.521918 | 0.006095275 | 1 | 500  | 527  | 481  | 482  | 384 | 456  | 361 |

|           |          |          |          |             |   |      |      |      |      |      |      |      |
|-----------|----------|----------|----------|-------------|---|------|------|------|------|------|------|------|
| Kcnh7     | -0.3064  | 5.4163   | 3.848512 | 0.049790149 | 1 | 344  | 447  | 427  | 328  | 273  | 372  | 287  |
| Rtn1      | -0.30588 | 9.020087 | 5.24765  | 0.021976429 | 1 | 3044 | 4352 | 3838 | 2984 | 2755 | 3392 | 2438 |
| Phactr2   | -0.30497 | 7.496238 | 3.905609 | 0.048125172 | 1 | 962  | 1208 | 930  | 884  | 758  | 911  | 729  |
| Tbrg1     | -0.30381 | 6.772456 | 5.227456 | 0.022233022 | 1 | 295  | 229  | 256  | 243  | 177  | 236  | 206  |
| Nedd4     | -0.30355 | 8.798239 | 5.479279 | 0.019243192 | 1 | 2179 | 2538 | 1823 | 1973 | 1552 | 1751 | 1774 |
| Cdkn2aipn | -0.29769 | 5.609023 | 4.045632 | 0.044285801 | 1 | 192  | 163  | 144  | 147  | 141  | 127  | 123  |
| Nsg2      | -0.29688 | 5.676339 | 5.545281 | 0.018530579 | 1 | 399  | 427  | 394  | 347  | 378  | 309  | 263  |
| Lin7a     | -0.29616 | 5.900244 | 4.194226 | 0.040561876 | 1 | 529  | 553  | 577  | 498  | 390  | 583  | 354  |
| Scn1a     | -0.28645 | 6.699604 | 7.683769 | 0.005571966 | 1 | 819  | 959  | 875  | 805  | 687  | 826  | 608  |
| Rbm27     | -0.28628 | 6.446566 | 4.87746  | 0.027209626 | 1 | 236  | 263  | 236  | 261  | 180  | 214  | 212  |
| Slmap     | -0.2834  | 6.744511 | 3.867035 | 0.049243435 | 1 | 381  | 403  | 361  | 355  | 264  | 410  | 255  |
| Knop1     | -0.28182 | 7.205628 | 4.292711 | 0.038276086 | 1 | 384  | 437  | 415  | 333  | 321  | 401  | 249  |
| Rassf3    | -0.27912 | 6.463374 | 4.553145 | 0.032858347 | 1 | 353  | 358  | 301  | 257  | 235  | 315  | 232  |
| Nrip1     | -0.27582 | 7.314109 | 4.090507 | 0.043124708 | 1 | 334  | 371  | 351  | 325  | 308  | 336  | 214  |
| Cdc5l     | -0.27362 | 6.562898 | 5.219729 | 0.022332035 | 1 | 356  | 472  | 355  | 358  | 323  | 370  | 260  |
| Homer2    | -0.27322 | 8.514333 | 4.512046 | 0.033656957 | 1 | 308  | 330  | 356  | 370  | 271  | 295  | 274  |
| Slitrk3   | -0.27255 | 5.995012 | 5.021066 | 0.025040742 | 1 | 498  | 513  | 464  | 490  | 370  | 504  | 348  |
| Cnst      | -0.26841 | 6.031513 | 4.088878 | 0.043166287 | 1 | 399  | 423  | 388  | 412  | 344  | 413  | 258  |
| Hecw1     | -0.25664 | 6.85252  | 4.750034 | 0.02929772  | 1 | 833  | 1026 | 851  | 753  | 683  | 883  | 605  |
| Scaf11    | -0.25456 | 7.46759  | 4.40993  | 0.035730299 | 1 | 569  | 698  | 548  | 510  | 496  | 474  | 469  |
| Ube2q1    | -0.25145 | 6.347393 | 3.886152 | 0.048685841 | 1 | 321  | 370  | 313  | 291  | 283  | 337  | 199  |
| Mkrn1     | -0.24734 | 6.711501 | 4.106075 | 0.042729424 | 1 | 311  | 354  | 286  | 296  | 270  | 305  | 212  |
| Kcna2     | -0.24163 | 8.282401 | 5.59316  | 0.018030744 | 1 | 2306 | 2560 | 2502 | 2498 | 1980 | 2529 | 1761 |
| Vps35     | -0.23798 | 7.71012  | 4.662304 | 0.030831799 | 1 | 819  | 1012 | 844  | 787  | 774  | 826  | 595  |
| Ablim1    | -0.23638 | 8.809637 | 4.784289 | 0.028720508 | 1 | 781  | 952  | 842  | 778  | 633  | 823  | 664  |
| Ppp1r12a  | -0.22469 | 8.3118   | 4.150518 | 0.041621793 | 1 | 607  | 688  | 516  | 691  | 498  | 679  | 435  |
| Arid1b    | -0.21471 | 6.942678 | 3.903176 | 0.048194904 | 1 | 350  | 363  | 323  | 315  | 285  | 353  | 236  |
| Ube3a     | -0.21452 | 7.609609 | 5.098424 | 0.023947592 | 1 | 916  | 1047 | 930  | 883  | 760  | 961  | 713  |
| Ppp1r7    | -0.20407 | 6.485586 | 3.871516 | 0.049112138 | 1 | 391  | 454  | 429  | 480  | 356  | 424  | 356  |

**Table S5. Differentially expressed genes in the TG of miR-183C MS-CKO vs age- and sex-matched WT control mice.**

|                          | logFC    | logCPM   | LR       | Pvalue   | FDR      | WT1 | WT2 | WT3 | WT4 | WT5 | MS-CKO1 | MS-CKO2 | MS-CKO3 | MS-CKO4 | MS-CKO5 |
|--------------------------|----------|----------|----------|----------|----------|-----|-----|-----|-----|-----|---------|---------|---------|---------|---------|
| <b>Upregulated genes</b> |          |          |          |          |          |     |     |     |     |     |         |         |         |         |         |
| Gp9                      | 5.183679 | -0.48114 | 8.710827 | 0.003163 | 0.574754 | 0   | 0   | 0   | 0   | 0   | 12      | 0       | 3       | 4       | 2       |
| LOC102634                | 4.926109 | 0.222768 | 12.35184 | 0.000441 | 0.278057 | 0   | 0   | 0   | 0   | 0   | 9       | 4       | 4       | 1       | 0       |
| Actl9                    | 4.855649 | -0.7191  | 7.578368 | 0.005907 | 0.735366 | 0   | 0   | 0   | 0   | 0   | 0       | 0       | 3       | 4       | 8       |
| Gm40812                  | 4.668406 | -0.70467 | 9.604594 | 0.001941 | 0.468633 | 0   | 0   | 0   | 0   | 0   | 6       | 7       | 0       | 1       | 1       |
| Gpr151                   | 4.598768 | -0.67018 | 9.34274  | 0.002239 | 0.502051 | 0   | 0   | 0   | 0   | 0   | 2       | 7       | 3       | 0       | 2       |
| Fam209                   | 4.562807 | -0.7044  | 7.951564 | 0.004805 | 0.698042 | 0   | 0   | 0   | 0   | 0   | 6       | 5       | 3       | 0       | 0       |
| Gm9903                   | 4.547494 | -0.49721 | 7.209135 | 0.007253 | 0.826025 | 0   | 0   | 0   | 0   | 0   | 0       | 8       | 6       | 0       | 0       |
| Aoah                     | 4.545228 | -0.57193 | 9.324151 | 0.002262 | 0.502051 | 0   | 0   | 0   | 0   | 0   | 5       | 8       | 0       | 1       | 0       |
| Gm32688                  | 4.538073 | -0.49753 | 9.61637  | 0.001929 | 0.468633 | 0   | 0   | 0   | 0   | 0   | 6       | 0       | 4       | 1       | 2       |
| Gm42012                  | 4.511072 | -0.28633 | 10.06352 | 0.001512 | 0.415328 | 0   | 0   | 0   | 0   | 0   | 8       | 0       | 1       | 3       | 1       |
| 9530027J0                | 4.510301 | -0.19187 | 12.45629 | 0.000417 | 0.275262 | 0   | 0   | 0   | 0   | 0   | 0       | 8       | 0       | 2       | 3       |
| Gm8773                   | 4.510089 | -0.5086  | 10.42045 | 0.001246 | 0.403928 | 0   | 0   | 0   | 0   | 0   | 1       | 8       | 0       | 1       | 3       |
| Rpl17-ps8                | 4.501937 | 0.019201 | 13.03571 | 0.000306 | 0.26816  | 0   | 0   | 0   | 0   | 0   | 0       | 7       | 3       | 1       | 2       |
| Trem12                   | 4.500997 | -0.62171 | 5.19223  | 0.022688 | 1        | 0   | 0   | 0   | 0   | 0   | 0       | 13      | 0       | 1       | 0       |
| LOC105244                | 4.491588 | 0.25894  | 10.13638 | 0.001454 | 0.411802 | 0   | 0   | 0   | 0   | 0   | 6       | 0       | 0       | 1       | 5       |
| Tnfsf9                   | 4.487182 | -0.73698 | 5.591473 | 0.018048 | 1        | 0   | 0   | 0   | 0   | 0   | 1       | 0       | 2       | 0       | 8       |
| AW822252                 | 4.409025 | -0.75418 | 4.236014 | 0.039575 | 1        | 0   | 0   | 0   | 0   | 0   | 0       | 0       | 0       | 1       | 9       |
| 6430590A                 | 4.398948 | -0.56068 | 4.598792 | 0.031994 | 1        | 0   | 0   | 0   | 0   | 0   | 0       | 0       | 0       | 6       | 5       |
| Ltc4s                    | 4.387966 | -0.40411 | 11.21305 | 0.000812 | 0.357189 | 0   | 0   | 0   | 0   | 0   | 2       | 4       | 4       | 1       | 1       |
| Hpx                      | 4.378418 | -0.68541 | 4.219372 | 0.039965 | 1        | 0   | 0   | 0   | 0   | 0   | 0       | 0       | 0       | 2       | 8       |
| Gm39408                  | 4.368238 | -0.13869 | 7.950539 | 0.004807 | 0.698042 | 0   | 0   | 0   | 0   | 0   | 0       | 2       | 5       | 5       | 0       |
| Tmed1                    | 4.343339 | 0.215777 | 11.41771 | 0.000727 | 0.348954 | 0   | 0   | 0   | 0   | 0   | 0       | 9       | 3       | 0       | 0       |
| Gm39668                  | 4.330081 | -0.26929 | 10.77259 | 0.00103  | 0.386047 | 0   | 0   | 0   | 0   | 0   | 0       | 0       | 3       | 5       | 3       |
| Gm41244                  | 4.306155 | -0.72114 | 8.745347 | 0.003104 | 0.574754 | 0   | 0   | 0   | 0   | 0   | 7       | 1       | 1       | 0       | 2       |
| 4931403E2                | 4.30393  | -0.3285  | 7.704399 | 0.005509 | 0.725022 | 0   | 0   | 0   | 0   | 0   | 0       | 3       | 0       | 0       | 7       |
| Gm41072                  | 4.302927 | -0.66904 | 7.542237 | 0.006027 | 0.74767  | 0   | 0   | 0   | 0   | 0   | 0       | 5       | 0       | 3       | 3       |
| Gm30086                  | 4.297359 | -0.75893 | 4.662018 | 0.030837 | 1        | 0   | 0   | 0   | 0   | 0   | 0       | 10      | 0       | 2       | 0       |
| Igfn1                    | 4.289987 | 0.340781 | 19.72932 | 8.92E-06 | 0.063459 | 1   | 0   | 0   | 0   | 0   | 3       | 9       | 5       | 6       | 5       |
| Elmo3                    | 4.288509 | 3.85859  | 16.61796 | 4.57E-05 | 0.149517 | 0   | 0   | 0   | 0   | 0   | 1       | 5       | 3       | 1       | 1       |
| Gm30440                  | 4.265361 | -0.51126 | 4.399668 | 0.035946 | 1        | 0   | 0   | 0   | 0   | 0   | 4       | 0       | 7       | 0       | 0       |
| Gm26708                  | 4.252867 | -0.58881 | 5.613811 | 0.017819 | 1        | 0   | 0   | 0   | 0   | 0   | 9       | 0       | 0       | 2       | 0       |
| Rag1                     | 4.250937 | -0.75737 | 4.5068   | 0.03376  | 1        | 0   | 0   | 0   | 0   | 0   | 9       | 0       | 0       | 2       | 0       |
| Gm31963                  | 4.248015 | -0.37688 | 6.376788 | 0.011562 | 0.988037 | 0   | 0   | 0   | 0   | 0   | 6       | 0       | 0       | 0       | 4       |
| Chil3                    | 4.247355 | -0.52541 | 5.189767 | 0.02272  | 1        | 0   | 0   | 0   | 0   | 0   | 0       | 9       | 0       | 0       | 2       |
| AW551984                 | 4.243342 | -0.61976 | 8.724196 | 0.00314  | 0.574754 | 0   | 0   | 0   | 0   | 0   | 2       | 2       | 0       | 7       | 0       |
| LOC108161                | 4.197853 | 0.286423 | 11.57271 | 0.000669 | 0.348951 | 0   | 0   | 0   | 0   | 0   | 1       | 3       | 0       | 2       | 4       |
| Gm31279                  | 4.17271  | -0.38064 | 10.0841  | 0.001496 | 0.413873 | 0   | 0   | 0   | 0   | 0   | 0       | 5       | 0       | 2       | 3       |
| Gm39472                  | 4.166817 | -0.812   | 4.135459 | 0.041994 | 1        | 0   | 0   | 0   | 0   | 0   | 0       | 7       | 0       | 0       | 3       |
| Ces1a                    | 4.157253 | -0.72058 | 4.990472 | 0.025487 | 1        | 0   | 0   | 0   | 0   | 0   | 9       | 0       | 0       | 0       | 1       |
| Gm35587                  | 4.152021 | -0.06001 | 10.34381 | 0.001299 | 0.406402 | 0   | 0   | 0   | 0   | 0   | 5       | 1       | 0       | 3       | 1       |
| Gm6410                   | 4.13821  | -0.52347 | 7.329196 | 0.006784 | 0.797626 | 0   | 0   | 0   | 0   | 0   | 2       | 0       | 6       | 2       | 0       |
| Cyp1a1                   | 4.130096 | -0.79318 | 6.398853 | 0.011419 | 0.982834 | 0   | 0   | 0   | 0   | 0   | 1       | 0       | 4       | 5       | 0       |
| LOC102634                | 4.123312 | 0.032493 | 7.248334 | 0.007097 | 0.816013 | 0   | 0   | 0   | 0   | 0   | 2       | 2       | 0       | 0       | 5       |
| Dnali1                   | 4.120758 | -0.60132 | 8.717071 | 0.003152 | 0.574754 | 0   | 0   | 0   | 0   | 0   | 0       | 0       | 0       | 4       | 5       |
| 5330432E                 | 4.120662 | -0.8123  | 4.026268 | 0.044797 | 1        | 0   | 0   | 0   | 0   | 0   | 8       | 0       | 0       | 2       | 0       |
| Btg4                     | 4.098026 | -0.7937  | 4.338022 | 0.03727  | 1        | 0   | 0   | 0   | 0   | 0   | 7       | 3       | 0       | 0       | 0       |
| LOC108161                | 4.080278 | -0.82997 | 6.151656 | 0.013129 | 1        | 0   | 0   | 0   | 0   | 0   | 0       | 0       | 1       | 5       | 3       |
| Gm41452                  | 4.025086 | -0.62078 | 5.149472 | 0.023253 | 1        | 0   | 0   | 0   | 0   | 0   | 0       | 0       | 5       | 3       | 1       |
| Gm41464                  | 4.02487  | -0.41534 | 6.741641 | 0.009419 | 0.931074 | 0   | 0   | 0   | 0   | 0   | 0       | 0       | 5       | 3       | 1       |
| Carm1                    | 3.994448 | -0.57517 | 6.662182 | 0.009848 | 0.943727 | 0   | 0   | 0   | 0   | 0   | 2       | 0       | 5       | 2       | 0       |
| Gm41212                  | 3.991392 | -0.79342 | 4.271799 | 0.03875  | 1        | 0   | 0   | 0   | 0   | 0   | 0       | 7       | 0       | 0       | 2       |
| Zfp352                   | 3.984816 | -0.70237 | 4.828485 | 0.027993 | 1        | 0   | 0   | 0   | 0   | 0   | 0       | 0       | 4       | 0       | 4       |
| COX2                     | 3.980001 | -0.82948 | 4.186788 | 0.04074  | 1        | 0   | 0   | 0   | 0   | 0   | 4       | 0       | 0       | 0       | 4       |
| Gm5089                   | 3.970967 | -0.77562 | 5.608527 | 0.017873 | 1        | 0   | 0   | 0   | 0   | 0   | 0       | 6       | 2       | 0       | 1       |
| Gm39446                  | 3.969126 | -0.42375 | 7.902029 | 0.004938 | 0.704155 | 0   | 0   | 0   | 0   | 0   | 6       | 3       | 0       | 0       | 0       |
| Rhox5                    | 3.963991 | 0.21668  | 8.102842 | 0.00442  | 0.668064 | 0   | 0   | 0   | 0   | 0   | 0       | 4       | 2       | 3       | 0       |
| Gm30012                  | 3.953848 | -0.59312 | 6.637443 | 0.009986 | 0.943727 | 0   | 0   | 0   | 0   | 0   | 4       | 4       | 0       | 1       | 0       |
| LOC105244                | 3.953444 | -0.81232 | 4.205725 | 0.040288 | 1        | 0   | 0   | 0   | 0   | 0   | 6       | 3       | 0       | 0       | 0       |
| Gm31418                  | 3.952346 | -0.61954 | 6.248122 | 0.012433 | 0.9915   | 0   | 0   | 0   | 0   | 0   | 0       | 8       | 0       | 0       | 1       |
| Gm6654                   | 3.926278 | 0.463521 | 10.47809 | 0.001208 | 0.403928 | 0   | 0   | 0   | 0   | 0   | 0       | 0       | 0       | 3       | 5       |
| C130080G                 | 3.926254 | -0.77489 | 7.09348  | 0.007736 | 0.854323 | 0   | 0   | 0   | 0   | 0   | 2       | 0       | 1       | 2       | 3       |
| Stpg2                    | 3.915899 | -0.22959 | 6.784988 | 0.009193 | 0.924097 | 0   | 0   | 0   | 0   | 0   | 0       | 9       | 0       | 0       | 0       |
| Rbm3os                   | 3.907344 | -0.25896 | 5.714585 | 0.016825 | 1        | 0   | 0   | 0   | 0   | 0   | 0       | 9       | 0       | 0       | 0       |
| Gm33703                  | 3.901853 | -0.02928 | 7.927035 | 0.00487  | 0.698042 | 0   | 0   | 0   | 0   | 0   | 0       | 0       | 6       | 0       | 2       |







|           |          |          |          |          |          |   |   |    |   |   |    |    |    |    |    |
|-----------|----------|----------|----------|----------|----------|---|---|----|---|---|----|----|----|----|----|
| Gm38630   | 3.158899 | -0.92705 | 3.910856 | 0.047975 | 1        | 0 | 0 | 0  | 0 | 0 | 0  | 0  | 0  | 0  | 4  |
| LOC108161 | 3.158899 | -0.92705 | 3.910856 | 0.047975 | 1        | 0 | 0 | 0  | 0 | 0 | 0  | 0  | 0  | 0  | 4  |
| Vmn1r183  | 3.158899 | -0.92705 | 3.910856 | 0.047975 | 1        | 0 | 0 | 0  | 0 | 0 | 0  | 0  | 0  | 0  | 4  |
| LOC105246 | 3.158569 | 0.478368 | 10.0354  | 0.001536 | 0.418522 | 0 | 0 | 1  | 1 | 0 | 5  | 0  | 0  | 10 | 4  |
| Gm15545   | 3.156062 | -0.2377  | 3.981397 | 0.046005 | 1        | 0 | 0 | 0  | 0 | 0 | 0  | 0  | 0  | 0  | 4  |
| Slc22a14  | 3.144604 | -0.7591  | 3.99987  | 0.045504 | 1        | 0 | 0 | 0  | 0 | 0 | 0  | 5  | 0  | 0  | 0  |
| Tas1r1    | 3.144603 | -0.47858 | 4.245273 | 0.03936  | 1        | 0 | 0 | 0  | 0 | 1 | 3  | 0  | 2  | 3  | 4  |
| Zc3h12d   | 3.137836 | -0.54167 | 4.525383 | 0.033396 | 1        | 0 | 1 | 0  | 0 | 0 | 2  | 0  | 4  | 6  | 1  |
| Ern2      | 3.131419 | -0.66797 | 6.177202 | 0.012941 | 1        | 0 | 0 | 0  | 0 | 1 | 3  | 0  | 3  | 3  | 3  |
| Tfap2c    | 3.120929 | 5.155689 | 12.3912  | 0.000431 | 0.277119 | 0 | 0 | 0  | 0 | 1 | 3  | 3  | 1  | 4  | 1  |
| Gm30618   | 3.097219 | -0.27434 | 5.895328 | 0.015181 | 1        | 0 | 0 | 0  | 0 | 2 | 4  | 6  | 5  | 2  | 3  |
| Glyat     | 3.090862 | 1.092783 | 11.84371 | 0.000579 | 0.322039 | 0 | 0 | 2  | 0 | 0 | 4  | 2  | 2  | 11 | 0  |
| Gm34050   | 3.08697  | -0.68995 | 4.253829 | 0.039162 | 1        | 0 | 0 | 0  | 0 | 0 | 0  | 0  | 0  | 1  | 3  |
| Sprr1a    | 3.07433  | 2.897486 | 10.19885 | 0.001405 | 0.406676 | 0 | 0 | 15 | 0 | 0 | 0  | 61 | 38 | 0  | 5  |
| Epha3     | 3.0724   | -0.53998 | 6.611307 | 0.010133 | 0.943727 | 1 | 0 | 1  | 0 | 0 | 6  | 3  | 0  | 3  | 6  |
| Appbp2os  | 3.063644 | -0.42169 | 4.807243 | 0.02834  | 1        | 0 | 0 | 0  | 0 | 0 | 0  | 0  | 0  | 1  | 3  |
| Gm38592   | 3.057345 | -0.18743 | 4.932677 | 0.026353 | 1        | 0 | 0 | 0  | 0 | 0 | 0  | 0  | 0  | 1  | 3  |
| Cxcr6     | 3.050456 | -0.58992 | 3.873796 | 0.049045 | 1        | 0 | 0 | 0  | 0 | 0 | 0  | 0  | 2  | 0  | 2  |
| Gm39643   | 3.048793 | -0.35008 | 5.090008 | 0.024064 | 1        | 0 | 0 | 0  | 0 | 0 | 0  | 0  | 0  | 1  | 3  |
| Gm35677   | 3.0245   | -0.70457 | 4.081514 | 0.043355 | 1        | 0 | 0 | 0  | 0 | 0 | 1  | 1  | 0  | 0  | 2  |
| Mrgprx1   | 3.011034 | -0.54062 | 5.377351 | 0.0204   | 1        | 1 | 0 | 0  | 0 | 1 | 2  | 12 | 1  | 0  | 4  |
| Gm35102   | 3.009583 | -0.37928 | 7.313123 | 0.006845 | 0.799565 | 0 | 0 | 0  | 1 | 0 | 5  | 4  | 0  | 1  | 1  |
| Prss8     | 3.001809 | 5.90271  | 11.23971 | 0.000801 | 0.357189 | 0 | 0 | 0  | 0 | 1 | 5  | 5  | 0  | 1  | 0  |
| Gm36287   | 2.988929 | 1.193622 | 9.234853 | 0.002375 | 0.514612 | 1 | 0 | 0  | 0 | 0 | 0  | 0  | 8  | 3  | 0  |
| 4930525G  | 2.984815 | 0.168928 | 4.418189 | 0.035558 | 1        | 0 | 0 | 0  | 0 | 2 | 0  | 10 | 7  | 0  | 2  |
| Kif2c     | 2.980988 | 2.076713 | 9.912559 | 0.001642 | 0.430212 | 1 | 0 | 0  | 0 | 0 | 3  | 5  | 0  | 3  | 0  |
| Ptgs2os2  | 2.980776 | -0.62669 | 4.551146 | 0.032897 | 1        | 0 | 0 | 0  | 0 | 0 | 3  | 0  | 0  | 0  | 1  |
| Gm29875   | 2.97648  | -0.90799 | 4.831664 | 0.027942 | 1        | 0 | 0 | 0  | 0 | 0 | 2  | 0  | 0  | 1  | 1  |
| Gm31436   | 2.97449  | -0.68827 | 5.008329 | 0.025226 | 1        | 0 | 0 | 0  | 0 | 0 | 2  | 0  | 0  | 1  | 1  |
| 1700056E2 | 2.97155  | 0.802373 | 20.62058 | 5.60E-06 | 0.063459 | 2 | 1 | 0  | 2 | 2 | 13 | 20 | 12 | 5  | 3  |
| Gm30908   | 2.963714 | -0.86831 | 4.943355 | 0.026191 | 1        | 0 | 0 | 0  | 0 | 0 | 0  | 1  | 0  | 2  | 1  |
| Aqp5      | 2.955929 | 8.464529 | 6.184794 | 0.012885 | 1        | 0 | 0 | 0  | 0 | 0 | 0  | 0  | 0  | 3  | 1  |
| Ankk1     | 2.953727 | 4.800681 | 6.108264 | 0.013455 | 1        | 0 | 0 | 0  | 0 | 0 | 0  | 0  | 0  | 4  | 0  |
| Myl7      | 2.952789 | 0.542246 | 5.547823 | 0.018504 | 1        | 0 | 0 | 0  | 0 | 0 | 0  | 0  | 4  | 0  | 0  |
| Krt75     | 2.952575 | 2.521894 | 5.977862 | 0.014487 | 1        | 0 | 0 | 0  | 0 | 0 | 4  | 0  | 0  | 0  | 0  |
| Gm33977   | 2.947784 | 0.585588 | 5.511034 | 0.018897 | 1        | 0 | 0 | 0  | 0 | 0 | 2  | 0  | 1  | 1  | 0  |
| Gm35531   | 2.947166 | -0.50791 | 4.327489 | 0.037502 | 1        | 0 | 0 | 0  | 0 | 0 | 0  | 0  | 4  | 0  | 0  |
| LOC108161 | 2.945696 | -0.11561 | 3.985765 | 0.045886 | 1        | 0 | 0 | 0  | 0 | 0 | 0  | 0  | 4  | 0  | 0  |
| Gm42237   | 2.945214 | -0.62258 | 3.86947  | 0.049172 | 1        | 0 | 0 | 0  | 0 | 0 | 0  | 0  | 4  | 0  | 0  |
| BC025446  | 2.945071 | 0.590681 | 5.888119 | 0.015243 | 1        | 0 | 0 | 0  | 0 | 0 | 0  | 2  | 0  | 2  | 0  |
| Gm32449   | 2.9429   | -0.46589 | 4.894027 | 0.02695  | 1        | 0 | 0 | 0  | 0 | 0 | 0  | 0  | 2  | 2  | 0  |
| LOC102631 | 2.94217  | -0.7755  | 4.223873 | 0.039859 | 1        | 0 | 0 | 0  | 0 | 0 | 0  | 0  | 3  | 1  | 0  |
| LOC102631 | 2.942119 | 0.491814 | 5.039485 | 0.024776 | 1        | 0 | 0 | 0  | 0 | 0 | 4  | 0  | 0  | 0  | 0  |
| Gm13582   | 2.940363 | -0.44649 | 4.173194 | 0.041068 | 1        | 0 | 0 | 0  | 0 | 0 | 2  | 0  | 2  | 0  | 0  |
| Gm30408   | 2.938161 | -0.09607 | 4.757376 | 0.029173 | 1        | 0 | 0 | 0  | 0 | 0 | 3  | 0  | 0  | 1  | 0  |
| LOC108161 | 2.936929 | -0.6934  | 4.122967 | 0.042305 | 1        | 0 | 0 | 0  | 0 | 0 | 0  | 0  | 2  | 2  | 0  |
| Gm6109    | 2.936109 | -0.47735 | 4.546524 | 0.032986 | 1        | 0 | 0 | 0  | 0 | 0 | 3  | 0  | 0  | 1  | 0  |
| Sdr39u1   | 2.935791 | 0.061784 | 4.646615 | 0.031115 | 1        | 0 | 0 | 0  | 0 | 0 | 2  | 0  | 0  | 2  | 0  |
| Gm41177   | 2.934833 | -0.52355 | 7.344369 | 0.006727 | 0.794981 | 0 | 1 | 2  | 0 | 0 | 3  | 6  | 2  | 1  | 10 |
| Otogl     | 2.930849 | -0.88864 | 3.946248 | 0.046976 | 1        | 0 | 0 | 0  | 0 | 0 | 3  | 0  | 0  | 1  | 0  |
| Gm2511    | 2.930446 | -0.84964 | 3.899128 | 0.048311 | 1        | 0 | 0 | 0  | 0 | 0 | 0  | 0  | 1  | 3  | 0  |
| Gm5544    | 2.930167 | -0.83112 | 3.863872 | 0.049336 | 1        | 0 | 0 | 0  | 0 | 0 | 0  | 0  | 1  | 3  | 0  |
| E2f7      | 2.928717 | 3.368234 | 14.5636  | 0.000136 | 0.195    | 2 | 0 | 0  | 0 | 0 | 2  | 5  | 3  | 5  | 2  |
| LOC102631 | 2.926977 | -0.16225 | 4.615524 | 0.031684 | 1        | 0 | 0 | 0  | 0 | 0 | 3  | 1  | 0  | 0  | 0  |
| A230056J0 | 2.924463 | -0.51104 | 4.056059 | 0.044013 | 1        | 0 | 0 | 0  | 0 | 1 | 5  | 0  | 0  | 6  | 0  |
| Gm40194   | 2.922593 | 1.898566 | 8.677938 | 0.003221 | 0.576484 | 0 | 0 | 1  | 0 | 0 | 0  | 0  | 1  | 4  | 5  |
| Fam3b     | 2.911868 | -0.24736 | 4.380667 | 0.036349 | 1        | 0 | 0 | 0  | 0 | 0 | 2  | 2  | 0  | 0  | 0  |
| Gm38482   | 2.901516 | -0.20807 | 4.318751 | 0.037695 | 1        | 0 | 0 | 0  | 0 | 0 | 0  | 3  | 1  | 0  | 0  |
| Gm30199   | 2.892417 | -0.30232 | 4.010489 | 0.045218 | 1        | 0 | 0 | 0  | 0 | 0 | 1  | 3  | 0  | 0  | 0  |
| 4930546K  | 2.875427 | -0.30205 | 3.847293 | 0.049826 | 1        | 0 | 0 | 0  | 0 | 0 | 0  | 4  | 0  | 0  | 0  |
| 4930481A  | 2.855164 | 1.114048 | 9.093042 | 0.002566 | 0.533576 | 2 | 1 | 0  | 0 | 0 | 7  | 0  | 12 | 1  | 3  |
| Gm5784    | 2.850115 | 0.042292 | 13.70961 | 0.000213 | 0.245312 | 2 | 0 | 0  | 0 | 3 | 8  | 7  | 6  | 5  | 9  |
| Gm128     | 2.849888 | 0.853973 | 8.187588 | 0.004218 | 0.651242 | 1 | 0 | 0  | 0 | 0 | 1  | 2  | 3  | 4  | 0  |
| 2610027K  | 2.849127 | -0.19194 | 4.611376 | 0.031761 | 1        | 1 | 0 | 2  | 0 | 0 | 3  | 6  | 0  | 1  | 10 |
| Myo5c     | 2.805741 | 1.140526 | 8.914789 | 0.002829 | 0.552875 | 1 | 0 | 0  | 0 | 1 | 0  | 2  | 0  | 13 | 1  |
| Vtcn1     | 2.800325 | 0.187578 | 5.6427   | 0.017528 | 1        | 0 | 0 | 1  | 0 | 0 | 0  | 0  | 0  | 6  | 3  |
| Clec4n    | 2.789661 | -0.62102 | 4.346262 | 0.03709  | 1        | 0 | 0 | 0  | 1 | 0 | 2  | 0  | 4  | 2  | 1  |
| Ucma      | 2.77372  | -0.50928 | 5.403428 | 0.020097 | 1        | 0 | 0 | 2  | 0 | 0 | 2  | 2  | 4  | 2  | 4  |

|            |          |          |          |          |          |   |   |   |   |    |    |    |   |    |    |
|------------|----------|----------|----------|----------|----------|---|---|---|---|----|----|----|---|----|----|
| Ccl27a     | 2.753491 | 3.008178 | 17.41918 | 3.00E-05 | 0.120527 | 4 | 3 | 2 | 1 | 14 | 7  | 2  | 7 | 93 | 38 |
| 4930478LC  | 2.745743 | 2.028744 | 7.503134 | 0.006159 | 0.759767 | 1 | 0 | 0 | 0 | 0  | 0  | 0  | 4 | 2  | 3  |
| Grhl2      | 2.731065 | 5.435743 | 8.599805 | 0.003362 | 0.584254 | 0 | 0 | 1 | 0 | 0  | 0  | 4  | 0 | 4  | 1  |
| Lrrc8e     | 2.718593 | 2.866002 | 7.866712 | 0.005035 | 0.713191 | 0 | 1 | 0 | 0 | 0  | 3  | 1  | 5 | 0  | 0  |
| LOC10816:  | 2.714627 | 0.690383 | 7.34105  | 0.00674  | 0.794981 | 0 | 0 | 0 | 0 | 1  | 0  | 1  | 5 | 3  | 0  |
| Gm26808    | 2.70671  | 0.12572  | 4.805398 | 0.028371 |          | 1 | 0 | 0 | 1 | 1  | 0  | 4  | 3 | 7  | 0  |
| Palb2      | 2.702992 | 0.726274 | 11.47743 | 0.000704 | 0.348954 | 0 | 0 | 0 | 4 | 1  | 10 | 11 | 5 | 5  | 0  |
| Zfp459     | 2.698766 | 0.526997 | 8.820132 | 0.002979 | 0.564113 | 0 | 2 | 0 | 0 | 0  | 5  | 3  | 4 | 3  | 0  |
| Pcdhga9    | 2.671537 | -0.60079 | 3.992092 | 0.045714 |          | 1 | 0 | 0 | 0 | 0  | 0  | 0  | 1 | 0  | 2  |
| Styk1      | 2.656056 | 0.410703 | 5.161725 | 0.02309  |          | 1 | 0 | 1 | 0 | 0  | 0  | 1  | 0 | 8  | 0  |
| Pcdhga10   | 2.655413 | 0.286716 | 3.891353 | 0.048535 |          | 1 | 0 | 0 | 0 | 0  | 2  | 0  | 0 | 4  | 6  |
| Cyp4f41-p: | 2.635202 | 0.392011 | 4.387321 | 0.036207 |          | 1 | 0 | 0 | 0 | 0  | 0  | 0  | 1 | 0  | 2  |
| Tmem139    | 2.61684  | 2.492159 | 4.595443 | 0.032057 |          | 1 | 0 | 0 | 0 | 0  | 0  | 0  | 0 | 0  | 3  |
| Gm35596    | 2.615006 | 0.342563 | 4.396738 | 0.036008 |          | 1 | 0 | 0 | 0 | 0  | 0  | 0  | 2 | 0  | 1  |
| LOC73899   | 2.600542 | 2.605556 | 4.532926 | 0.033249 |          | 1 | 0 | 0 | 0 | 0  | 0  | 0  | 3 | 0  | 0  |
| Acsm1      | 2.600191 | 5.719637 | 4.612671 | 0.031737 |          | 1 | 0 | 0 | 0 | 0  | 1  | 0  | 0 | 2  | 0  |
| Gm13782    | 2.598267 | 0.310223 | 4.129155 | 0.04215  |          | 1 | 0 | 0 | 0 | 0  | 0  | 0  | 3 | 0  | 0  |
| LOC10816:  | 2.598012 | 1.618181 | 4.518762 | 0.033525 |          | 1 | 0 | 0 | 0 | 0  | 0  | 0  | 0 | 3  | 0  |
| Gm40235    | 2.597715 | -0.00879 | 4.340624 | 0.037213 |          | 1 | 0 | 0 | 0 | 0  | 0  | 0  | 2 | 1  | 0  |
| Gm39761    | 2.597486 | 0.103551 | 5.314975 | 0.021143 |          | 1 | 0 | 0 | 3 | 0  | 0  | 4  | 0 | 1  | 8  |
| Pym1       | 2.593334 | 0.158019 | 4.567655 | 0.032581 |          | 1 | 1 | 0 | 0 | 0  | 1  | 1  | 2 | 1  | 3  |
| Cldn8      | 2.592697 | 0.32872  | 3.851407 | 0.049704 |          | 1 | 0 | 0 | 0 | 0  | 0  | 0  | 2 | 1  | 0  |
| Sult6b1    | 2.592622 | -0.082   | 4.117381 | 0.042445 |          | 1 | 0 | 0 | 0 | 0  | 3  | 0  | 0 | 0  | 0  |
| Gm35066    | 2.592034 | 0.408004 | 4.188694 | 0.040694 |          | 1 | 0 | 0 | 0 | 0  | 1  | 0  | 0 | 2  | 0  |
| Gm15738    | 2.59145  | -0.58782 | 4.200386 | 0.040415 |          | 1 | 0 | 0 | 0 | 0  | 0  | 0  | 0 | 3  | 0  |
| Gm16041    | 2.588004 | 0.371261 | 4.106471 | 0.042719 |          | 1 | 0 | 0 | 0 | 0  | 0  | 1  | 2 | 0  | 0  |
| A330035P:  | 2.586096 | -0.2222  | 3.908583 | 0.04804  |          | 1 | 0 | 0 | 0 | 0  | 0  | 0  | 0 | 3  | 0  |
| LOC10263:  | 2.581882 | 1.368626 | 5.900972 | 0.015133 |          | 1 | 0 | 0 | 1 | 0  | 4  | 0  | 4 | 0  | 0  |
| Gm12414    | 2.580832 | -0.76012 | 4.006568 | 0.045323 |          | 1 | 0 | 0 | 0 | 0  | 1  | 1  | 0 | 1  | 0  |
| LOC10524:  | 2.576811 | 0.357553 | 4.246696 | 0.039321 |          | 1 | 0 | 0 | 0 | 0  | 0  | 3  | 0 | 0  | 0  |
| Cep112it   | 2.576746 | -0.11727 | 6.158449 | 0.013079 |          | 1 | 0 | 0 | 0 | 1  | 4  | 0  | 0 | 2  | 2  |
| Gm33834    | 2.57516  | -0.04498 | 6.278759 | 0.012219 | 0.9915   | 1 | 0 | 0 | 0 | 2  | 4  | 1  | 4 | 8  | 2  |
| Cldn7      | 2.569738 | 7.348937 | 7.197278 | 0.007301 | 0.826025 | 0 | 0 | 0 | 0 | 1  | 0  | 0  | 0 | 8  | 0  |
| Nek5       | 2.56848  | 2.407881 | 6.84606  | 0.008884 | 0.913142 | 0 | 0 | 1 | 0 | 0  | 0  | 2  | 0 | 6  | 0  |
| Sox1       | 2.565599 | -0.35399 | 9.105573 | 0.002548 | 0.533013 | 1 | 0 | 3 | 0 | 0  | 4  | 4  | 6 | 8  | 1  |
| Cdh3       | 2.560964 | 1.349162 | 11.42342 | 0.000725 | 0.348954 | 0 | 2 | 0 | 0 | 2  | 0  | 8  | 6 | 7  | 3  |
| Epcam      | 2.554887 | 5.558254 | 13.66183 | 0.000219 | 0.245312 | 3 | 0 | 0 | 0 | 0  | 1  | 0  | 0 | 17 | 0  |
| Gm6525     | 2.548745 | 1.457579 | 6.135686 | 0.013248 |          | 1 | 0 | 1 | 0 | 0  | 4  | 0  | 2 | 2  | 0  |
| LOC10816:  | 2.542707 | 1.737654 | 13.6794  | 0.000217 | 0.245312 | 3 | 0 | 1 | 0 | 0  | 9  | 7  | 0 | 4  | 3  |
| Npy        | 2.538445 | 6.939852 | 19.4031  | 1.06E-05 | 0.063459 | 2 | 1 | 0 | 0 | 2  | 0  | 17 | 9 | 2  | 0  |
| Gm31619    | 2.515215 | -0.22137 | 6.762379 | 0.00931  | 0.927798 | 0 | 0 | 1 | 1 | 0  | 3  | 0  | 3 | 3  | 3  |
| Gm34868    | 2.503648 | 0.49131  | 4.623795 | 0.031531 |          | 1 | 0 | 1 | 0 | 0  | 1  | 5  | 0 | 1  | 1  |
| Sifn9      | 2.48754  | 2.891968 | 16.0592  | 6.14E-05 | 0.152284 | 3 | 0 | 0 | 3 | 0  | 9  | 6  | 9 | 0  | 7  |
| 1700015F1  | 2.483633 | -0.49188 | 4.215627 | 0.040053 |          | 1 | 0 | 0 | 1 | 0  | 1  | 0  | 2 | 1  | 3  |
| Fam92b     | 2.473427 | -0.55643 | 4.462649 | 0.034644 |          | 1 | 0 | 2 | 1 | 0  | 7  | 6  | 2 | 1  | 2  |
| Slc44a5    | 2.472816 | -0.23726 | 4.946619 | 0.026142 |          | 1 | 0 | 0 | 1 | 1  | 3  | 7  | 0 | 6  | 1  |
| Atp6v0a4   | 2.467865 | -0.50789 | 3.911047 | 0.04797  |          | 1 | 0 | 0 | 0 | 1  | 0  | 3  | 0 | 0  | 2  |
| Gm38978    | 2.456496 | 1.44456  | 7.628906 | 0.005744 | 0.735366 | 1 | 1 | 0 | 0 | 0  | 0  | 0  | 0 | 8  | 4  |
| Gm33937    | 2.427567 | -0.72125 | 4.276008 | 0.038654 |          | 1 | 0 | 0 | 1 | 0  | 2  | 0  | 2 | 2  | 1  |
| Fcer2a     | 2.408679 | 0.590991 | 7.702996 | 0.005513 | 0.725022 | 1 | 0 | 2 | 0 | 0  | 3  | 3  | 5 | 3  | 2  |
| Pla2g4c    | 2.402183 | 0.464463 | 6.78009  | 0.009218 | 0.924097 | 1 | 0 | 2 | 0 | 4  | 11 | 9  | 6 | 9  | 1  |
| Ankdd1a    | 2.402147 | 1.372654 | 5.616344 | 0.017794 |          | 1 | 0 | 0 | 1 | 0  | 1  | 0  | 2 | 3  | 1  |
| Gm15880    | 2.39976  | -0.39142 | 4.610721 | 0.031773 |          | 1 | 0 | 0 | 0 | 0  | 1  | 1  | 0 | 4  | 2  |
| Sox21      | 2.395448 | 4.707051 | 5.960863 | 0.014627 |          | 1 | 0 | 0 | 0 | 1  | 0  | 0  | 1 | 0  | 5  |
| Chmp4c     | 2.394273 | 5.455672 | 5.986219 | 0.014418 |          | 1 | 0 | 0 | 1 | 0  | 2  | 3  | 0 | 1  | 1  |
| Kcnk7      | 2.384526 | 1.792408 | 5.555548 | 0.018422 |          | 1 | 0 | 0 | 0 | 0  | 1  | 5  | 0 | 0  | 2  |
| Ccdc89     | 2.355584 | 0.311076 | 6.323951 | 0.011912 | 0.9915   | 0 | 0 | 2 | 0 | 2  | 0  | 11 | 0 | 5  | 4  |
| 170010111  | 2.345154 | -0.29604 | 7.449957 | 0.006344 | 0.767853 | 1 | 0 | 2 | 0 | 1  | 1  | 3  | 4 | 4  | 7  |
| Krt13      | 2.339584 | 9.169037 | 7.92832  | 0.004867 | 0.698042 | 0 | 0 | 0 | 0 | 2  | 0  | 0  | 0 | 7  | 4  |
| Krtcap3    | 2.338451 | 3.050796 | 15.382   | 8.78E-05 | 0.164152 | 0 | 1 | 1 | 0 | 3  | 5  | 3  | 7 | 5  | 4  |
| Fam160a1   | 2.327964 | 3.890668 | 14.57624 | 0.000135 | 0.195    | 1 | 1 | 2 | 0 | 1  | 4  | 6  | 9 | 5  | 0  |
| Ildr1      | 2.326745 | 5.066649 | 10.20807 | 0.001398 | 0.406676 | 0 | 0 | 3 | 0 | 0  | 0  | 5  | 2 | 0  | 8  |
| Gm33454    | 2.326666 | 1.598816 | 6.927968 | 0.008486 | 0.893702 | 2 | 0 | 0 | 0 | 0  | 0  | 4  | 0 | 4  | 3  |
| P3h2       | 2.298936 | 1.869445 | 6.420177 | 0.011283 | 0.980859 | 0 | 2 | 0 | 0 | 0  | 1  | 0  | 8 | 2  | 0  |
| Itgb6      | 2.289643 | 2.82925  | 9.274211 | 0.002324 | 0.506723 | 0 | 0 | 0 | 0 | 3  | 4  | 8  | 1 | 0  | 2  |
| Oacyl      | 2.282125 | 0.462377 | 6.296393 | 0.012098 | 0.9915   | 0 | 5 | 0 | 0 | 0  | 8  | 9  | 0 | 1  | 7  |
| LOC10524:  | 2.274144 | -0.21743 | 4.245738 | 0.039349 |          | 1 | 0 | 0 | 0 | 2  | 0  | 7  | 2 | 0  | 2  |
| Ms4a4d     | 2.270987 | -0.06887 | 4.241018 | 0.039458 |          | 1 | 0 | 2 | 3 | 0  | 3  | 11 | 0 | 4  | 5  |

|           |          |          |          |          |          |   |    |    |    |    |    |    |    |    |    |
|-----------|----------|----------|----------|----------|----------|---|----|----|----|----|----|----|----|----|----|
| Rph3al    | 2.266894 | 0.587413 | 5.207622 | 0.022488 | 1        | 0 | 0  | 0  | 2  | 0  | 0  | 2  | 2  | 3  | 3  |
| Gm39667   | 2.231301 | 0.057726 | 4.492621 | 0.034041 | 1        | 0 | 1  | 0  | 0  | 1  | 0  | 6  | 2  | 3  | 0  |
| Gm10560   | 2.226149 | -0.12146 | 4.232758 | 0.039651 | 1        | 4 | 0  | 3  | 0  | 0  | 4  | 3  | 8  | 5  | 9  |
| Gm30569   | 2.215805 | 0.873211 | 5.385357 | 0.020306 | 1        | 0 | 0  | 0  | 0  | 4  | 0  | 0  | 8  | 4  | 6  |
| Ntf5      | 2.210054 | 1.304247 | 5.691753 | 0.017045 | 1        | 0 | 0  | 3  | 0  | 0  | 0  | 7  | 0  | 7  | 0  |
| Slc2a10   | 2.206727 | 1.451906 | 6.867967 | 0.008775 | 0.912443 | 0 | 0  | 2  | 1  | 1  | 3  | 8  | 7  | 0  | 0  |
| Liph      | 2.202754 | 6.060459 | 7.031622 | 0.008008 | 0.858587 | 2 | 0  | 0  | 0  | 0  | 0  | 7  | 0  | 1  | 2  |
| Ttc36     | 2.195276 | 4.198049 | 4.736364 | 0.029531 | 1        | 0 | 0  | 0  | 1  | 0  | 0  | 2  | 0  | 1  | 3  |
| Wnt7b     | 2.191198 | 6.168407 | 4.774405 | 0.028886 | 1        | 0 | 1  | 0  | 0  | 0  | 0  | 1  | 2  | 0  | 3  |
| Tpbg      | 2.189887 | 1.578915 | 11.59497 | 0.000661 | 0.348951 | 2 | 1  | 3  | 0  | 2  | 6  | 9  | 0  | 8  | 10 |
| 1700123J1 | 2.185657 | -0.33876 | 4.032978 | 0.044619 | 1        | 2 | 0  | 0  | 1  | 0  | 9  | 1  | 2  | 1  | 1  |
| Aurkb     | 2.175459 | 1.354228 | 4.009445 | 0.045246 | 1        | 0 | 0  | 0  | 1  | 0  | 0  | 5  | 0  | 1  | 0  |
| Gm15423   | 2.154723 | 0.565566 | 4.81141  | 0.028272 | 1        | 2 | 1  | 0  | 0  | 1  | 6  | 1  | 0  | 7  | 4  |
| Fermt3    | 2.081425 | 2.706777 | 10.43267 | 0.001238 | 0.403928 | 2 | 0  | 0  | 0  | 4  | 5  | 9  | 5  | 0  | 5  |
| Gm31594   | 2.076804 | -0.13638 | 4.837224 | 0.027852 | 1        | 2 | 2  | 0  | 2  | 0  | 3  | 0  | 15 | 3  | 3  |
| Sytl1     | 2.06667  | 7.389941 | 5.93812  | 0.014817 | 1        | 0 | 0  | 0  | 0  | 2  | 0  | 1  | 0  | 1  | 7  |
| Ltf       | 2.063511 | 2.145187 | 7.662678 | 0.005637 | 0.734833 | 0 | 1  | 3  | 1  | 0  | 4  | 11 | 0  | 5  | 0  |
| 1500002F1 | 2.04926  | 0.405233 | 5.233868 | 0.022151 | 1        | 4 | 4  | 0  | 1  | 2  | 2  | 8  | 5  | 9  | 18 |
| LOC10816f | 1.997858 | -0.06708 | 5.751731 | 0.016472 | 1        | 0 | 4  | 0  | 2  | 1  | 8  | 4  | 5  | 7  | 3  |
| Gm10910   | 1.991955 | 0.528748 | 4.646936 | 0.031109 | 1        | 0 | 1  | 0  | 0  | 4  | 1  | 4  | 10 | 3  | 2  |
| LOC10816f | 1.981538 | 0.745508 | 4.355052 | 0.036899 | 1        | 0 | 0  | 0  | 4  | 0  | 0  | 1  | 1  | 1  | 10 |
| Gm13139   | 1.969504 | 2.433597 | 9.167191 | 0.002464 | 0.526744 | 2 | 12 | 1  | 0  | 5  | 11 | 14 | 36 | 11 | 6  |
| LOC10524f | 1.951366 | 0.173686 | 5.012092 | 0.025171 | 1        | 0 | 2  | 0  | 2  | 1  | 7  | 4  | 3  | 5  | 0  |
| Gm38639   | 1.949805 | 1.752609 | 12.88696 | 0.000331 | 0.274974 | 8 | 1  | 1  | 6  | 2  | 7  | 17 | 22 | 9  | 7  |
| Polq      | 1.948171 | 0.940322 | 5.010283 | 0.025197 | 1        | 1 | 0  | 0  | 0  | 7  | 2  | 12 | 6  | 10 | 1  |
| Gm26666   | 1.906759 | -0.19399 | 4.944536 | 0.026173 | 1        | 4 | 1  | 0  | 1  | 1  | 1  | 5  | 3  | 5  | 10 |
| Il20rb    | 1.904379 | 5.402057 | 4.832886 | 0.027922 | 1        | 0 | 0  | 0  | 0  | 2  | 0  | 0  | 4  | 1  | 3  |
| Fam83g    | 1.896957 | 6.351785 | 4.718522 | 0.029839 | 1        | 1 | 0  | 0  | 0  | 1  | 3  | 5  | 0  | 0  | 0  |
| E130012A: | 1.890023 | 5.136739 | 13.17451 | 0.000284 | 0.267345 | 3 | 1  | 0  | 0  | 4  | 1  | 8  | 9  | 4  | 5  |
| Igfbpl1   | 1.882489 | -0.04025 | 5.024334 | 0.024994 | 1        | 0 | 1  | 4  | 1  | 2  | 4  | 13 | 5  | 3  | 2  |
| 2610305D: | 1.881209 | 0.998523 | 4.480184 | 0.03429  | 1        | 2 | 6  | 0  | 13 | 0  | 13 | 38 | 3  | 10 | 5  |
| Lpin3     | 1.871216 | 3.023096 | 5.769859 | 0.016303 | 1        | 0 | 1  | 2  | 0  | 0  | 2  | 7  | 0  | 2  | 0  |
| Nhlrc3    | 1.847769 | 0.835202 | 4.421084 | 0.035497 | 1        | 3 | 0  | 0  | 0  | 0  | 1  | 0  | 2  | 7  | 1  |
| Gm33223   | 1.847069 | 2.364575 | 12.83411 | 0.00034  | 0.274974 | 1 | 0  | 4  | 9  | 0  | 6  | 13 | 16 | 4  | 4  |
| Pantr1    | 1.846479 | 2.299585 | 5.110522 | 0.023781 | 1        | 0 | 3  | 0  | 0  | 0  | 3  | 0  | 4  | 4  | 0  |
| Wdfy4     | 1.839825 | 0.18862  | 6.806447 | 0.009083 | 0.923346 | 3 | 3  | 0  | 2  | 1  | 3  | 15 | 7  | 4  | 2  |
| AW11201C  | 1.836981 | 0.282153 | 4.627549 | 0.031462 | 1        | 5 | 1  | 6  | 3  | 2  | 10 | 8  | 17 | 18 | 1  |
| Prr15l    | 1.819018 | 1.718841 | 4.976927 | 0.025688 | 1        | 0 | 2  | 0  | 0  | 2  | 0  | 0  | 0  | 12 | 2  |
| Hyal1     | 1.796911 | 3.714712 | 14.74932 | 0.000123 | 0.195    | 5 | 6  | 3  | 4  | 3  | 4  | 6  | 11 | 20 | 22 |
| Gm5917    | 1.792484 | -0.15573 | 3.964288 | 0.046475 | 1        | 0 | 1  | 0  | 4  | 1  | 0  | 3  | 8  | 1  | 6  |
| Gm8210    | 1.787868 | 0.858376 | 4.678119 | 0.030549 | 1        | 0 | 0  | 2  | 1  | 1  | 0  | 4  | 6  | 1  | 2  |
| LOC10816f | 1.780373 | 0.895589 | 5.306358 | 0.021248 | 1        | 2 | 0  | 0  | 4  | 0  | 7  | 4  | 2  | 6  | 0  |
| Pigh      | 1.772195 | 0.785121 | 5.631192 | 0.017644 | 1        | 0 | 0  | 2  | 7  | 0  | 11 | 1  | 10 | 4  | 0  |
| Ctf1      | 1.757648 | 1.632849 | 4.455987 | 0.034779 | 1        | 2 | 1  | 1  | 0  | 2  | 8  | 4  | 0  | 8  | 0  |
| Gm40074   | 1.753892 | 1.55541  | 8.534762 | 0.003484 | 0.594076 | 5 | 2  | 15 | 5  | 12 | 42 | 12 | 15 | 23 | 19 |
| Gm40869   | 1.7538   | 1.261022 | 4.437476 | 0.035158 | 1        | 1 | 1  | 0  | 0  | 2  | 3  | 0  | 6  | 0  | 4  |
| LOC10263f | 1.744984 | 0.037234 | 4.170207 | 0.041141 | 1        | 0 | 4  | 4  | 0  | 1  | 3  | 16 | 3  | 5  | 2  |
| Gm29997   | 1.7335   | 2.515636 | 9.313016 | 0.002275 | 0.502051 | 0 | 1  | 3  | 5  | 0  | 3  | 4  | 6  | 5  | 8  |
| Batf2     | 1.727828 | 1.811007 | 4.209946 | 0.040188 | 1        | 0 | 0  | 2  | 0  | 1  | 0  | 9  | 0  | 1  | 0  |
| Gm31399   | 1.726734 | -0.19526 | 4.71863  | 0.029838 | 1        | 2 | 0  | 0  | 0  | 2  | 2  | 3  | 5  | 2  | 1  |
| Slc37a2   | 1.698243 | 0.961264 | 4.493131 | 0.034031 | 1        | 0 | 5  | 1  | 1  | 1  | 8  | 4  | 3  | 7  | 3  |
| Lrrc56    | 1.696857 | 0.729995 | 7.081351 | 0.007789 | 0.854323 | 7 | 4  | 1  | 1  | 1  | 3  | 14 | 12 | 3  | 10 |
| LOC10816f | 1.693974 | 1.455701 | 4.813007 | 0.028246 | 1        | 5 | 0  | 0  | 3  | 0  | 2  | 0  | 5  | 17 | 0  |
| Myb       | 1.649466 | 2.1592   | 4.404996 | 0.035834 | 1        | 0 | 0  | 2  | 0  | 2  | 0  | 5  | 0  | 5  | 2  |
| Gm40671   | 1.637725 | 2.290739 | 7.134991 | 0.007559 | 0.846584 | 2 | 0  | 3  | 2  | 2  | 4  | 2  | 1  | 5  | 12 |
| Gm32856   | 1.618705 | 1.605449 | 9.763704 | 0.00178  | 0.444309 | 4 | 3  | 10 | 2  | 1  | 22 | 9  | 2  | 12 | 8  |
| Dct       | 1.61657  | 4.147293 | 3.889707 | 0.048583 | 1        | 0 | 1  | 0  | 1  | 2  | 0  | 9  | 1  | 0  | 2  |
| 2810408A: | 1.61123  | 0.904054 | 4.214611 | 0.040077 | 1        | 0 | 0  | 0  | 6  | 2  | 5  | 2  | 5  | 6  | 3  |
| Platr14   | 1.605964 | 0.44118  | 6.871268 | 0.008759 | 0.912443 | 1 | 3  | 4  | 2  | 3  | 8  | 16 | 5  | 4  | 3  |
| Zic4      | 1.585363 | 1.011842 | 4.054832 | 0.044045 | 1        | 4 | 5  | 2  | 8  | 5  | 20 | 1  | 7  | 9  | 23 |
| Slc38a5   | 1.585018 | -0.03799 | 4.161639 | 0.041349 | 1        | 2 | 0  | 6  | 0  | 3  | 6  | 10 | 3  | 5  | 5  |
| 2210406O: | 1.569141 | 1.338624 | 8.171732 | 0.004255 | 0.654152 | 5 | 10 | 9  | 3  | 3  | 17 | 5  | 7  | 36 | 14 |
| Gm16174   | 1.561967 | 1.852129 | 5.480201 | 0.019233 | 1        | 0 | 0  | 9  | 0  | 3  | 9  | 0  | 8  | 9  | 4  |
| Aaed1     | 1.553936 | 2.697786 | 13.50599 | 0.000238 | 0.247537 | 6 | 6  | 2  | 6  | 2  | 9  | 16 | 10 | 21 | 2  |
| 2310002Fc | 1.553355 | 1.073183 | 4.995411 | 0.025415 | 1        | 4 | 2  | 0  | 4  | 2  | 11 | 4  | 1  | 12 | 4  |
| Slc35g1   | 1.541536 | 1.978038 | 6.632975 | 0.010011 | 0.943727 | 4 | 4  | 0  | 4  | 0  | 9  | 1  | 16 | 6  | 0  |
| Mfsd7a    | 1.540224 | 2.551146 | 8.913079 | 0.002831 | 0.552875 | 1 | 8  | 0  | 11 | 6  | 15 | 14 | 27 | 3  | 8  |
| 2610528A: | 1.531752 | 9.534763 | 4.281448 | 0.038531 | 1        | 0 | 0  | 0  | 0  | 4  | 0  | 0  | 0  | 8  | 3  |

|           |          |          |          |          |          |    |    |    |    |    |    |    |    |    |    |
|-----------|----------|----------|----------|----------|----------|----|----|----|----|----|----|----|----|----|----|
| Ipp       | 1.515415 | 1.963188 | 10.78711 | 0.001022 | 0.386047 | 5  | 2  | 11 | 5  | 5  | 6  | 26 | 11 | 16 | 10 |
| Fdxacb1   | 1.503177 | 2.248325 | 10.54768 | 0.001163 | 0.403928 | 8  | 4  | 11 | 0  | 7  | 4  | 17 | 18 | 17 | 18 |
| Slurp1    | 1.473888 | 9.923438 | 5.906081 | 0.015089 |          | 1  | 0  | 1  | 0  | 6  | 0  | 0  | 0  | 13 | 7  |
| AF357425  | 1.453611 | 0.198745 | 5.054629 | 0.02456  |          | 1  | 2  | 2  | 4  | 9  | 0  | 11 | 15 | 7  | 6  |
| LOC102640 | 1.448104 | 1.00211  | 3.993951 | 0.045664 |          | 1  | 1  | 0  | 0  | 1  | 4  | 1  | 1  | 5  | 4  |
| Galnt12   | 1.447006 | 3.042206 | 6.01202  | 0.014209 |          | 1  | 1  | 1  | 0  | 0  | 6  | 0  | 7  | 0  | 10 |
| Vrk2      | 1.444442 | 2.590029 | 11.18623 | 0.000824 | 0.357189 | 8  | 3  | 6  | 7  | 7  | 16 | 22 | 11 | 15 | 10 |
| Gm27003   | 1.440219 | 1.113818 | 4.441655 | 0.035072 |          | 1  | 6  | 0  | 1  | 7  | 1  | 7  | 12 | 13 | 3  |
| 1810044D  | 1.43244  | 0.645088 | 4.317063 | 0.037732 |          | 1  | 2  | 1  | 6  | 2  | 3  | 3  | 21 | 1  | 7  |
| Thap6     | 1.425841 | 2.605763 | 8.68606  | 0.003207 | 0.576484 | 4  | 6  | 0  | 6  | 4  | 4  | 18 | 19 | 6  | 2  |
| Cand2     | 1.424125 | 3.343628 | 17.40823 | 3.02E-05 | 0.120527 | 4  | 12 | 30 | 17 | 13 | 30 | 56 | 39 | 27 | 21 |
| Mirc35hg  | 1.41472  | 2.789164 | 10.6166  | 0.001121 | 0.403208 | 15 | 4  | 15 | 11 | 12 | 27 | 16 | 45 | 23 | 19 |
| Ak4       | 1.385884 | 2.425287 | 9.302314 | 0.002289 | 0.502051 | 9  | 2  | 4  | 2  | 1  | 11 | 12 | 11 | 6  | 2  |
| Krt6b     | 1.380036 | 10.92671 | 6.452401 | 0.01108  | 0.977017 | 0  | 0  | 0  | 0  | 9  | 0  | 0  | 0  | 16 | 5  |
| Ttc22     | 1.36443  | 4.254864 | 3.890769 | 0.048552 |          | 1  | 2  | 0  | 0  | 1  | 2  | 3  | 6  | 0  | 3  |
| Pkd2l2    | 1.350055 | 0.427449 | 4.72081  | 0.0298   |          | 1  | 10 | 5  | 4  | 3  | 1  | 5  | 12 | 13 | 14 |
| Gm15866   | 1.337414 | 1.560613 | 3.917861 | 0.047776 |          | 1  | 2  | 1  | 1  | 2  | 8  | 12 | 1  | 7  | 1  |
| Snord22   | 1.332353 | 1.43904  | 3.874864 | 0.049014 |          | 1  | 11 | 0  | 12 | 0  | 6  | 5  | 3  | 31 | 10 |
| Mrpl23    | 1.307306 | 0.793407 | 4.228529 | 0.03975  |          | 1  | 0  | 1  | 5  | 5  | 4  | 10 | 10 | 6  | 4  |
| Galk2     | 1.297067 | 1.457875 | 5.040282 | 0.024764 |          | 1  | 2  | 2  | 4  | 3  | 6  | 2  | 11 | 2  | 9  |
| LOC101050 | 1.293419 | 3.990287 | 6.05598  | 0.013859 |          | 1  | 1  | 0  | 0  | 4  | 6  | 3  | 8  | 6  | 5  |
| Mia       | 1.277686 | 1.941558 | 5.087907 | 0.024093 |          | 1  | 8  | 2  | 3  | 7  | 6  | 21 | 12 | 0  | 23 |
| LOC108160 | 1.27409  | 1.53087  | 4.015907 | 0.045073 |          | 1  | 9  | 1  | 3  | 1  | 5  | 9  | 9  | 3  | 15 |
| Nusap1    | 1.242871 | 4.683688 | 9.514015 | 0.002039 | 0.479868 | 7  | 6  | 3  | 8  | 1  | 8  | 8  | 10 | 12 | 13 |
| Il17rb    | 1.242707 | 0.906833 | 5.004037 | 0.025288 |          | 1  | 10 | 1  | 13 | 5  | 11 | 8  | 20 | 30 | 9  |
| LOC102630 | 1.235441 | 0.53817  | 4.200471 | 0.040413 |          | 1  | 7  | 0  | 0  | 6  | 7  | 9  | 12 | 7  | 8  |
| Xndc1     | 1.228253 | 2.100022 | 8.142101 | 0.004325 | 0.659293 | 6  | 4  | 7  | 3  | 10 | 9  | 11 | 17 | 9  | 15 |
| Exoc3l4   | 1.21892  | 1.059676 | 5.825755 | 0.015793 |          | 1  | 1  | 8  | 7  | 4  | 7  | 7  | 11 | 12 | 13 |
| 4933440N  | 1.214504 | 1.210447 | 4.21543  | 0.040058 |          | 1  | 0  | 5  | 0  | 4  | 5  | 7  | 13 | 3  | 5  |
| Rhpn2     | 1.204084 | 2.973708 | 4.149141 | 0.041656 |          | 1  | 0  | 4  | 0  | 1  | 5  | 2  | 9  | 0  | 5  |
| Gpr17     | 1.203612 | 0.454463 | 4.002349 | 0.045437 |          | 1  | 1  | 2  | 8  | 4  | 3  | 6  | 2  | 4  | 11 |
| Zfp658    | 1.184244 | 1.095255 | 5.808753 | 0.015947 |          | 1  | 3  | 3  | 8  | 9  | 8  | 13 | 12 | 17 | 16 |
| Cd109     | 1.182752 | 5.778835 | 7.010256 | 0.008104 | 0.865176 | 4  | 2  | 3  | 0  | 6  | 6  | 6  | 10 | 11 | 0  |
| Helq      | 1.181784 | 1.819251 | 10.51346 | 0.001185 | 0.403928 | 7  | 5  | 5  | 11 | 7  | 13 | 11 | 12 | 17 | 15 |
| Lrrc1     | 1.17653  | 4.273964 | 15.99548 | 6.35E-05 | 0.152284 | 6  | 5  | 12 | 13 | 8  | 9  | 25 | 8  | 26 | 17 |
| Mns1      | 1.157014 | 2.029436 | 5.169837 | 0.022982 |          | 1  | 4  | 2  | 11 | 13 | 10 | 30 | 8  | 14 | 11 |
| Tor2a     | 1.155548 | 1.824659 | 4.754786 | 0.029217 |          | 1  | 0  | 0  | 4  | 5  | 5  | 3  | 9  | 3  | 8  |
| Rnls      | 1.151781 | 0.990141 | 3.909223 | 0.048022 |          | 1  | 3  | 2  | 7  | 3  | 2  | 3  | 10 | 7  | 3  |
| Gm35290   | 1.148411 | 2.144985 | 6.625757 | 0.010051 | 0.943727 | 12 | 6  | 7  | 3  | 4  | 11 | 19 | 8  | 13 | 12 |
| Naip1     | 1.148351 | 4.308702 | 6.008439 | 0.014238 |          | 1  | 3  | 3  | 4  | 7  | 0  | 8  | 12 | 8  | 5  |
| Arhgef19  | 1.126581 | 4.300836 | 10.4852  | 0.001203 | 0.403928 | 8  | 14 | 3  | 26 | 5  | 24 | 38 | 22 | 16 | 7  |
| Syce2     | 1.121443 | 2.176993 | 4.764769 | 0.029048 |          | 1  | 2  | 3  | 8  | 8  | 0  | 5  | 13 | 0  | 10 |
| LOC108160 | 1.118598 | 1.318273 | 7.578804 | 0.005906 | 0.735366 | 6  | 7  | 7  | 10 | 16 | 25 | 12 | 22 | 20 | 9  |
| Nrp       | 1.113834 | 2.378702 | 4.793998 | 0.028559 |          | 1  | 2  | 0  | 3  | 7  | 3  | 0  | 4  | 13 | 9  |
| LOC105240 | 1.107109 | 2.919783 | 5.105079 | 0.023856 |          | 1  | 6  | 2  | 0  | 8  | 0  | 6  | 4  | 5  | 11 |
| LOC102630 | 1.091381 | 1.720153 | 3.861267 | 0.049413 |          | 1  | 5  | 10 | 10 | 0  | 4  | 2  | 11 | 25 | 11 |
| Asprv1    | 1.07184  | 11.0908  | 6.095541 | 0.013552 |          | 1  | 0  | 0  | 1  | 5  | 11 | 1  | 0  | 2  | 19 |
| Kif20b    | 1.069419 | 4.795518 | 14.2749  | 0.000158 | 0.217041 | 25 | 8  | 11 | 13 | 5  | 36 | 24 | 27 | 21 | 6  |
| Gm16938   | 1.068567 | 4.383868 | 6.244615 | 0.012457 | 0.9915   | 5  | 10 | 2  | 0  | 10 | 10 | 14 | 14 | 8  | 6  |
| Mrap      | 1.068092 | 0.847215 | 4.837669 | 0.027845 |          | 1  | 7  | 7  | 10 | 3  | 4  | 15 | 7  | 11 | 9  |
| Morn1     | 1.065262 | 2.227368 | 7.24189  | 0.007122 | 0.816013 | 5  | 19 | 26 | 9  | 15 | 21 | 32 | 35 | 16 | 29 |
| Myrf      | 1.06168  | 1.763573 | 6.738441 | 0.009436 | 0.931074 | 7  | 12 | 20 | 21 | 24 | 27 | 45 | 34 | 29 | 17 |
| D930048N  | 1.060358 | 3.062113 | 3.910307 | 0.047991 |          | 1  | 0  | 0  | 5  | 1  | 5  | 0  | 3  | 5  | 7  |
| Ms4a6c    | 1.056012 | 1.328803 | 3.919408 | 0.047732 |          | 1  | 7  | 16 | 1  | 7  | 15 | 18 | 20 | 25 | 20 |
| Gm5595    | 1.055175 | 1.541782 | 4.515856 | 0.033582 |          | 1  | 8  | 4  | 7  | 8  | 6  | 15 | 6  | 10 | 12 |
| Traf5     | 1.054545 | 4.368438 | 4.218658 | 0.039982 |          | 1  | 4  | 1  | 2  | 3  | 2  | 14 | 3  | 4  | 1  |
| Gm26868   | 1.053972 | 0.429711 | 3.854682 | 0.049607 |          | 1  | 8  | 5  | 6  | 6  | 2  | 5  | 19 | 12 | 10 |
| Man1a     | 1.053737 | 2.225622 | 5.294431 | 0.021394 |          | 1  | 6  | 9  | 17 | 12 | 20 | 18 | 32 | 13 | 38 |
| Zwilch    | 1.046151 | 2.134845 | 3.948684 | 0.046908 |          | 1  | 4  | 8  | 21 | 2  | 3  | 17 | 16 | 23 | 3  |
| Fpgs      | 1.042061 | 1.928192 | 7.592952 | 0.00586  | 0.735366 | 4  | 6  | 14 | 8  | 13 | 20 | 16 | 21 | 14 | 9  |
| Esrp1     | 1.023005 | 7.137429 | 5.970212 | 0.01455  |          | 1  | 5  | 3  | 3  | 0  | 7  | 6  | 0  | 4  | 20 |
| Bbs12     | 1.020751 | 1.750827 | 6.618672 | 0.010092 | 0.943727 | 14 | 4  | 7  | 8  | 12 | 15 | 15 | 26 | 19 | 6  |
| Ankrd7    | 1.018541 | 2.199943 | 4.738197 | 0.0295   |          | 1  | 6  | 7  | 2  | 6  | 10 | 7  | 23 | 6  | 13 |
| Gpr68     | 1.015613 | 2.523267 | 6.651627 | 0.009907 | 0.943727 | 11 | 5  | 47 | 5  | 12 | 32 | 33 | 29 | 11 | 27 |
| Ammecr1   | 1.01483  | 3.029431 | 7.445264 | 0.00636  | 0.767853 | 7  | 7  | 17 | 3  | 17 | 6  | 31 | 24 | 13 | 16 |
| Cpm       | 1.004152 | 6.715549 | 15.74284 | 7.26E-05 | 0.159588 | 19 | 5  | 15 | 19 | 10 | 32 | 20 | 13 | 40 | 12 |
| Exosc8    | 0.993584 | 2.636769 | 6.331226 | 0.011863 | 0.9915   | 11 | 9  | 15 | 7  | 11 | 5  | 13 | 16 | 38 | 19 |
| Apex2     | 0.988669 | 2.660835 | 6.268305 | 0.012292 | 0.9915   | 3  | 4  | 7  | 9  | 16 | 7  | 12 | 16 | 14 | 17 |

|           |          |          |          |          |          |    |     |     |    |    |    |     |    |     |     |    |
|-----------|----------|----------|----------|----------|----------|----|-----|-----|----|----|----|-----|----|-----|-----|----|
| Tpx2      | 0.981962 | 4.449456 | 10.43881 | 0.001234 | 0.403928 | 18 | 16  | 12  | 4  | 9  | 28 | 19  | 20 | 19  | 17  |    |
| 4921531C  | 0.976509 | 2.948553 | 5.874492 | 0.015362 |          | 1  | 17  | 10  | 18 | 1  | 4  | 15  | 21 | 21  | 24  | 7  |
| Gdpd2     | 0.975087 | 4.412126 | 17.03261 | 3.67E-05 | 0.132188 | 25 | 16  | 23  | 24 | 17 | 27 | 52  | 31 | 48  | 21  |    |
| Sap30     | 0.969425 | 1.775132 | 3.969785 | 0.046324 |          | 1  | 3   | 4   | 7  | 3  | 6  | 3   | 10 | 7   | 10  | 9  |
| Bud31     | 0.969408 | 2.539531 | 5.110419 | 0.023783 |          | 1  | 16  | 8   | 12 | 7  | 10 | 11  | 8  | 22  | 24  | 24 |
| Dock8     | 0.950242 | 3.064174 | 6.324043 | 0.011911 | 0.9915   | 10 | 25  | 9   | 3  | 19 | 7  | 34  | 33 | 29  | 16  | 16 |
| Birc5     | 0.949991 | 4.773387 | 10.18874 | 0.001413 | 0.406676 | 10 | 11  | 21  | 23 | 12 | 35 | 33  | 31 | 16  | 12  |    |
| Bag2      | 0.946096 | 4.134024 | 10.10346 | 0.00148  | 0.412723 | 12 | 15  | 24  | 14 | 17 | 30 | 33  | 19 | 44  | 12  |    |
| Gm35558   | 0.944608 | 0.969824 | 4.158573 | 0.041424 |          | 1  | 4   | 9   | 11 | 15 | 3  | 17  | 16 | 6   | 17  | 12 |
| Rftn1     | 0.938247 | 1.446897 | 5.601    | 0.01795  |          | 1  | 9   | 6   | 19 | 6  | 11 | 15  | 19 | 21  | 17  | 12 |
| Prob1     | 0.935756 | 1.769483 | 4.690173 | 0.030336 |          | 1  | 5   | 11  | 16 | 23 | 17 | 34  | 32 | 21  | 13  | 17 |
| Hpgds     | 0.930485 | 6.927807 | 9.37266  | 0.002202 | 0.498337 | 10 | 12  | 10  | 2  | 11 | 19 | 15  | 15 | 15  | 11  |    |
| Mrv1      | 0.90423  | 1.388283 | 4.734936 | 0.029556 |          | 1  | 18  | 7   | 9  | 10 | 13 | 19  | 11 | 35  | 16  |    |
| Zfp119a   | 0.896403 | 1.75185  | 5.213769 | 0.022409 |          | 1  | 1   | 1   | 7  | 11 | 9  | 7   | 12 | 9   | 12  | 6  |
| Zfp53     | 0.892402 | 3.340033 | 10.1599  | 0.001435 | 0.409808 | 18 | 19  | 6   | 14 | 13 | 33 | 27  | 15 | 25  | 15  |    |
| Gm34583   | 0.889803 | 1.344285 | 6.576954 | 0.010331 | 0.951656 | 16 | 8   | 13  | 11 | 11 | 15 | 36  | 16 | 17  | 12  |    |
| Plekhg2   | 0.874554 | 3.516052 | 10.90007 | 0.000962 | 0.380847 | 24 | 14  | 38  | 52 | 19 | 70 | 58  | 27 | 40  | 30  |    |
| Phyhip    | 0.870295 | 6.276858 | 10.34815 | 0.001296 | 0.406402 | 18 | 14  | 5   | 6  | 18 | 23 | 17  | 28 | 16  | 14  |    |
| Zfp280c   | 0.868691 | 3.257178 | 10.47969 | 0.001207 | 0.403928 | 29 | 15  | 38  | 20 | 34 | 30 | 42  | 42 | 65  | 35  |    |
| Gal       | 0.858908 | 2.935301 | 7.986112 | 0.004714 | 0.695008 | 43 | 24  | 111 | 48 | 47 | 52 | 139 | 97 | 77  | 51  |    |
| Gm10051   | 0.858523 | 3.191789 | 5.54487  | 0.018535 |          | 1  | 9   | 2   | 16 | 16 | 9  | 13  | 15 | 12  | 28  | 11 |
| Sema4g    | 0.857621 | 2.67662  | 5.756153 | 0.016431 |          | 1  | 38  | 9   | 35 | 64 | 44 | 33  | 61 | 67  | 85  | 42 |
| Col7a1    | 0.853771 | 3.962998 | 3.96045  | 0.046581 |          | 1  | 5   | 2   | 6  | 2  | 8  | 0   | 5  | 10  | 13  | 8  |
| Ccdc61    | 0.841471 | 3.044189 | 6.414293 | 0.011321 | 0.980859 | 24 | 13  | 19  | 20 | 11 | 30 | 37  | 18 | 29  | 21  |    |
| Cenpf     | 0.840453 | 6.278671 | 4.676824 | 0.030572 |          | 1  | 2   | 9   | 13 | 4  | 3  | 23  | 7  | 11  | 3   | 4  |
| Mtm1      | 0.839866 | 2.042098 | 3.856986 | 0.049539 |          | 1  | 11  | 13  | 11 | 10 | 18 | 15  | 25 | 15  | 32  | 14 |
| Syk       | 0.837393 | 3.809797 | 3.957843 | 0.046653 |          | 1  | 4   | 1   | 6  | 2  | 10 | 6   | 20 | 4   | 1   | 5  |
| Mybl1     | 0.833527 | 2.671057 | 6.30164  | 0.012063 | 0.9915   | 36 | 12  | 19  | 39 | 32 | 36 | 53  | 45 | 33  | 43  |    |
| Pptc7     | 0.829422 | 2.179206 | 5.691545 | 0.017047 |          | 1  | 6   | 10  | 20 | 8  | 5  | 8   | 15 | 19  | 19  | 13 |
| Zfp395    | 0.804709 | 3.005912 | 5.033005 | 0.024869 |          | 1  | 25  | 16  | 6  | 9  | 9  | 24  | 16 | 13  | 37  | 13 |
| 5930430LC | 0.794347 | 3.171385 | 4.889412 | 0.027022 |          | 1  | 11  | 11  | 34 | 4  | 20 | 22  | 34 | 24  | 23  | 17 |
| Arhgef37  | 0.792966 | 4.515096 | 8.591185 | 0.003378 | 0.584254 | 20 | 15  | 8   | 20 | 15 | 25 | 21  | 16 | 32  | 23  |    |
| BC064078  | 0.789788 | 5.247732 | 4.03942  | 0.044449 |          | 1  | 1   | 1   | 9  | 10 | 2  | 9   | 0  | 12  | 9   | 4  |
| Rfc5      | 0.783918 | 3.8536   | 7.782057 | 0.005277 | 0.725022 | 18 | 10  | 22  | 14 | 11 | 30 | 32  | 14 | 18  | 17  |    |
| Nsun3     | 0.782458 | 2.623054 | 3.903883 | 0.048175 |          | 1  | 9   | 7   | 12 | 11 | 10 | 18  | 21 | 19  | 6   | 9  |
| Casp8     | 0.778966 | 5.179959 | 5.235284 | 0.022133 |          | 1  | 12  | 8   | 15 | 0  | 12 | 13  | 7  | 17  | 18  | 15 |
| Pop4      | 0.777279 | 4.831554 | 6.855288 | 0.008838 | 0.913142 | 68 | 106 | 40  | 57 | 66 | 77 | 84  | 87 | 176 | 101 |    |
| Pxdn      | 0.775641 | 2.299822 | 4.303789 | 0.038028 |          | 1  | 28  | 11  | 15 | 49 | 28 | 57  | 39 | 30  | 41  | 24 |
| Il17rc    | 0.770952 | 5.271153 | 7.605404 | 0.005819 | 0.735366 | 12 | 23  | 11  | 33 | 16 | 20 | 33  | 18 | 17  | 48  |    |
| Hook1     | 0.765451 | 4.352157 | 4.453278 | 0.034834 |          | 1  | 15  | 1   | 30 | 4  | 10 | 17  | 11 | 11  | 29  | 17 |
| Hspa1a    | 0.759859 | 6.964555 | 13.10185 | 0.000295 | 0.267345 | 35 | 28  | 30  | 30 | 25 | 60 | 56  | 44 | 29  | 29  |    |
| Zfp408    | 0.758981 | 2.93589  | 4.898698 | 0.026877 |          | 1  | 7   | 7   | 19 | 16 | 12 | 30  | 11 | 15  | 11  | 19 |
| Myo7a     | 0.757696 | 2.75947  | 6.161716 | 0.013054 |          | 1  | 20  | 20  | 26 | 35 | 20 | 37  | 25 | 30  | 49  | 32 |
| Tango6    | 0.743972 | 2.673748 | 5.095742 | 0.023985 |          | 1  | 24  | 13  | 37 | 33 | 13 | 36  | 51 | 35  | 30  | 18 |
| Fgd3      | 0.728252 | 4.839148 | 4.297486 | 0.038169 |          | 1  | 11  | 2   | 11 | 8  | 2  | 14  | 7  | 13  | 5   | 9  |
| Ccdc51    | 0.723452 | 4.577933 | 7.244159 | 0.007113 | 0.816013 | 3  | 16  | 11  | 19 | 11 | 24 | 13  | 23 | 15  | 10  |    |
| Agbl4     | 0.720749 | 1.731179 | 6.320398 | 0.011936 | 0.9915   | 22 | 18  | 23  | 23 | 8  | 30 | 23  | 27 | 27  | 25  |    |
| Gtf2h3    | 0.719139 | 3.241003 | 6.206306 | 0.01273  |          | 1  | 12  | 11  | 32 | 16 | 15 | 29  | 21 | 25  | 29  | 16 |
| Snx24     | 0.715787 | 3.21744  | 6.272919 | 0.01226  | 0.9915   | 10 | 36  | 42  | 49 | 29 | 35 | 45  | 61 | 44  | 44  |    |
| Nbeal2    | 0.704168 | 6.265568 | 3.888776 | 0.04861  |          | 1  | 7   | 2   | 4  | 10 | 7  | 9   | 1  | 5   | 22  | 5  |
| Cfap69    | 0.70151  | 2.272465 | 4.568938 | 0.032557 |          | 1  | 23  | 16  | 11 | 13 | 15 | 26  | 20 | 16  | 23  | 26 |
| Spon2     | 0.700277 | 6.339697 | 4.604663 | 0.031885 |          | 1  | 6   | 5   | 16 | 23 | 6  | 13  | 24 | 8   | 19  | 12 |
| Zgrf1     | 0.691654 | 2.538466 | 4.218814 | 0.039978 |          | 1  | 20  | 8   | 10 | 20 | 23 | 25  | 15 | 21  | 25  | 26 |
| Ttl14     | 0.689476 | 3.096306 | 4.807567 | 0.028335 |          | 1  | 14  | 15  | 10 | 12 | 17 | 15  | 14 | 21  | 29  | 17 |
| Ankrd33b  | 0.689243 | 1.971216 | 3.989964 | 0.045772 |          | 1  | 13  | 26  | 22 | 20 | 29 | 28  | 15 | 37  | 32  |    |
| Herc6     | 0.684789 | 3.982428 | 4.709073 | 0.030004 |          | 1  | 15  | 19  | 22 | 27 | 20 | 44  | 28 | 15  | 25  | 29 |
| Pias3     | 0.672559 | 3.286609 | 3.932723 | 0.047355 |          | 1  | 17  | 17  | 22 | 31 | 17 | 42  | 37 | 16  | 33  | 15 |
| Gm2694    | 0.668912 | 4.781649 | 5.720287 | 0.01677  |          | 1  | 11  | 7   | 22 | 22 | 2  | 25  | 25 | 14  | 13  | 9  |
| Gk5       | 0.667053 | 3.585529 | 3.955831 | 0.046709 |          | 1  | 21  | 10  | 9  | 21 | 5  | 17  | 16 | 7   | 27  | 22 |
| Spsb3     | 0.648027 | 3.366184 | 5.105302 | 0.023853 |          | 1  | 36  | 17  | 60 | 52 | 41 | 32  | 63 | 65  | 67  | 43 |
| Irf6      | 0.644096 | 7.435745 | 6.605153 | 0.010168 | 0.943727 | 13 | 7   | 21  | 12 | 21 | 21 | 34  | 13 | 10  | 21  |    |
| Ckap2l    | 0.642156 | 5.590159 | 3.954327 | 0.046751 |          | 1  | 10  | 8   | 12 | 9  | 4  | 21  | 15 | 11  | 8   | 3  |
| Get4      | 0.641686 | 2.822491 | 4.399933 | 0.03594  |          | 1  | 14  | 22  | 35 | 41 | 29 | 26  | 59 | 49  | 38  | 17 |
| Epb4114a  | 0.630282 | 5.502612 | 9.116308 | 0.002533 | 0.532993 | 45 | 27  | 42  | 40 | 23 | 41 | 45  | 46 | 67  | 36  |    |
| Xkr8      | 0.628735 | 2.224039 | 4.209562 | 0.040197 |          | 1  | 26  | 17  | 31 | 21 | 23 | 31  | 45 | 39  | 19  | 24 |
| Nsun6     | 0.620387 | 3.633674 | 6.014207 | 0.014207 |          | 1  | 30  | 28  | 23 | 24 | 32 | 25  | 33 | 38  | 52  | 36 |
| Polr3a    | 0.616015 | 3.521212 | 5.144787 | 0.023316 |          | 1  | 35  | 28  | 47 | 57 | 40 | 35  | 73 | 43  | 58  | 58 |
| Figl2     | 0.602837 | 3.778694 | 6.339796 | 0.011806 | 0.9915   | 22 | 29  | 42  | 35 | 50 | 63 | 52  | 54 | 25  | 39  |    |

|           |          |          |          |          |          |     |     |     |     |     |     |     |     |     |     |
|-----------|----------|----------|----------|----------|----------|-----|-----|-----|-----|-----|-----|-----|-----|-----|-----|
| Efh2      | 0.593804 | 4.999869 | 8.460317 | 0.00363  | 0.610211 | 17  | 39  | 38  | 42  | 25  | 32  | 55  | 54  | 40  | 28  |
| Zkscan8   | 0.593112 | 4.326801 | 7.059984 | 0.007882 | 0.858587 | 42  | 52  | 66  | 110 | 50  | 67  | 99  | 76  | 92  | 71  |
| Cxadr     | 0.574645 | 6.319607 | 5.781452 | 0.016196 | 1        | 12  | 23  | 34  | 10  | 12  | 17  | 15  | 33  | 31  | 20  |
| Ankrd52   | 0.571507 | 3.198218 | 4.63995  | 0.031236 | 1        | 38  | 35  | 32  | 57  | 48  | 49  | 44  | 52  | 66  | 56  |
| Med23     | 0.569858 | 4.118849 | 5.831911 | 0.015738 | 1        | 54  | 28  | 54  | 22  | 24  | 55  | 74  | 40  | 33  | 34  |
| Adnp2     | 0.568066 | 3.392278 | 4.466281 | 0.03457  | 1        | 9   | 18  | 45  | 38  | 21  | 30  | 40  | 24  | 38  | 29  |
| Cbr2      | 0.56701  | 9.26506  | 4.996433 | 0.0254   | 1        | 20  | 5   | 22  | 26  | 32  | 22  | 36  | 28  | 27  | 20  |
| Dapl1     | 0.566872 | 11.011   | 7.603211 | 0.005826 | 0.735366 | 25  | 14  | 30  | 42  | 15  | 32  | 34  | 19  | 35  | 37  |
| Vasn      | 0.566348 | 4.711099 | 5.034135 | 0.024852 | 1        | 6   | 29  | 26  | 41  | 28  | 37  | 38  | 10  | 34  | 43  |
| Pfkfb4    | 0.560552 | 4.175748 | 4.949483 | 0.026098 | 1        | 37  | 20  | 58  | 24  | 36  | 45  | 42  | 31  | 56  | 45  |
| Spaca6    | 0.560028 | 4.022863 | 4.180143 | 0.0409   | 1        | 35  | 29  | 39  | 39  | 20  | 33  | 46  | 43  | 57  | 27  |
| Hspa1b    | 0.552861 | 7.815268 | 5.278581 | 0.021589 | 1        | 29  | 25  | 41  | 33  | 41  | 40  | 67  | 34  | 42  | 32  |
| Anln      | 0.551883 | 4.610143 | 4.754936 | 0.029214 | 1        | 64  | 24  | 39  | 60  | 69  | 73  | 99  | 50  | 68  | 40  |
| Copg2     | 0.549689 | 4.662089 | 6.24773  | 0.012435 | 0.9915   | 66  | 30  | 61  | 28  | 43  | 57  | 47  | 61  | 67  | 56  |
| Trp53bp1  | 0.53484  | 4.317915 | 5.597612 | 0.017985 | 1        | 100 | 53  | 107 | 58  | 75  | 98  | 92  | 75  | 104 | 116 |
| Dcaf12l1  | 0.531352 | 3.620735 | 6.574856 | 0.010343 | 0.951656 | 69  | 72  | 64  | 100 | 56  | 95  | 91  | 89  | 119 | 59  |
| Fbl1      | 0.530206 | 2.48455  | 7.084134 | 0.007777 | 0.854323 | 34  | 40  | 37  | 43  | 34  | 52  | 54  | 42  | 50  | 37  |
| Zcchc14   | 0.528393 | 3.610003 | 5.333665 | 0.020917 | 1        | 28  | 37  | 41  | 52  | 32  | 45  | 62  | 45  | 59  | 26  |
| Rnf213    | 0.523153 | 4.207412 | 4.115725 | 0.042486 | 1        | 27  | 21  | 79  | 37  | 58  | 39  | 56  | 48  | 72  | 52  |
| Klhdc8b   | 0.518817 | 3.928197 | 6.023415 | 0.014117 | 1        | 91  | 61  | 60  | 93  | 93  | 90  | 103 | 107 | 123 | 76  |
| Cep162    | 0.51179  | 4.908204 | 9.004219 | 0.002694 | 0.552121 | 98  | 57  | 116 | 106 | 101 | 146 | 110 | 98  | 129 | 98  |
| Gcat      | 0.50816  | 5.625052 | 7.631122 | 0.005737 | 0.735366 | 36  | 31  | 68  | 55  | 37  | 45  | 53  | 53  | 63  | 57  |
| Tep1      | 0.507955 | 4.743146 | 7.828141 | 0.005144 | 0.722878 | 90  | 69  | 65  | 44  | 49  | 98  | 69  | 80  | 77  | 72  |
| Stmn1     | 0.504501 | 6.276974 | 4.213239 | 0.04011  | 1        | 351 | 445 | 387 | 835 | 313 | 502 | 577 | 785 | 506 | 428 |
| Cdv3      | 0.502886 | 5.735538 | 8.659901 | 0.003253 | 0.579336 | 65  | 72  | 126 | 106 | 79  | 82  | 94  | 90  | 180 | 91  |
| Zdhhc5    | 0.499617 | 6.163521 | 6.501661 | 0.010777 | 0.95735  | 49  | 47  | 83  | 104 | 49  | 55  | 106 | 74  | 76  | 80  |
| Tmem62    | 0.494338 | 3.938339 | 4.666486 | 0.030757 | 1        | 28  | 33  | 92  | 67  | 69  | 58  | 75  | 58  | 71  | 75  |
| Onecut1   | 0.490874 | 3.09934  | 5.52373  | 0.01876  | 1        | 74  | 34  | 53  | 71  | 39  | 64  | 73  | 70  | 72  | 48  |
| Racgap1   | 0.485122 | 5.010656 | 5.783055 | 0.016181 | 1        | 39  | 41  | 38  | 35  | 42  | 39  | 61  | 38  | 65  | 36  |
| Myof      | 0.481878 | 6.733919 | 3.92733  | 0.047507 | 1        | 11  | 20  | 22  | 8   | 15  | 14  | 21  | 21  | 12  | 23  |
| Ddx28     | 0.480921 | 3.811286 | 4.455519 | 0.034789 | 1        | 54  | 40  | 65  | 79  | 43  | 69  | 60  | 51  | 99  | 53  |
| Sgsm2     | 0.479207 | 3.825933 | 4.923892 | 0.026488 | 1        | 40  | 37  | 91  | 44  | 40  | 56  | 61  | 70  | 51  | 57  |
| Dagla     | 0.478684 | 3.433676 | 4.086463 | 0.043228 | 1        | 48  | 40  | 59  | 67  | 49  | 35  | 64  | 60  | 68  | 80  |
| Mast4     | 0.473108 | 7.918613 | 12.75263 | 0.000356 | 0.274974 | 105 | 57  | 127 | 134 | 91  | 99  | 108 | 141 | 141 | 112 |
| 1300002E1 | 0.471891 | 4.431776 | 5.429759 | 0.019796 | 1        | 43  | 32  | 57  | 81  | 75  | 56  | 67  | 82  | 91  | 45  |
| Pdlim5    | 0.469814 | 6.942713 | 11.49092 | 0.000699 | 0.348954 | 92  | 63  | 92  | 109 | 69  | 88  | 121 | 94  | 139 | 64  |
| Gramd3    | 0.46558  | 5.493426 | 4.211074 | 0.040161 | 1        | 15  | 19  | 24  | 23  | 11  | 23  | 28  | 20  | 29  | 9   |
| Nt5dc3    | 0.465338 | 4.86018  | 10.89673 | 0.000963 | 0.380847 | 166 | 154 | 274 | 230 | 165 | 249 | 243 | 238 | 246 | 183 |
| Mcph1     | 0.462857 | 4.042949 | 4.560992 | 0.032708 | 1        | 67  | 55  | 124 | 84  | 46  | 79  | 104 | 88  | 85  | 78  |
| Rbm4b     | 0.461431 | 4.591225 | 4.625074 | 0.031508 | 1        | 75  | 72  | 87  | 87  | 85  | 123 | 75  | 98  | 107 | 80  |
| Sec22b    | 0.459119 | 4.743508 | 5.943058 | 0.014775 | 1        | 60  | 81  | 80  | 69  | 64  | 87  | 117 | 94  | 82  | 49  |
| Traf6     | 0.458663 | 4.062869 | 4.867661 | 0.027365 | 1        | 39  | 31  | 48  | 40  | 41  | 55  | 46  | 47  | 56  | 32  |
| Asb7      | 0.457784 | 4.398315 | 5.714479 | 0.016826 | 1        | 58  | 66  | 80  | 55  | 71  | 73  | 94  | 88  | 81  | 60  |
| Kdm3b     | 0.453046 | 5.150959 | 6.070969 | 0.013742 | 1        | 59  | 55  | 46  | 86  | 68  | 99  | 85  | 48  | 85  | 56  |
| Uba6      | 0.452114 | 5.509668 | 7.700057 | 0.005522 | 0.725022 | 123 | 143 | 234 | 206 | 142 | 186 | 208 | 208 | 270 | 120 |
| 11-Mar    | 0.446487 | 3.389366 | 4.64934  | 0.031065 | 1        | 71  | 66  | 117 | 104 | 71  | 115 | 121 | 108 | 84  | 70  |
| Agpat2    | 0.434845 | 4.651243 | 4.811595 | 0.028269 | 1        | 18  | 30  | 43  | 34  | 21  | 49  | 21  | 25  | 48  | 25  |
| Rps6ka4   | 0.432776 | 4.726613 | 4.361373 | 0.036763 | 1        | 43  | 40  | 88  | 96  | 43  | 78  | 57  | 55  | 70  | 82  |
| Tbl3      | 0.428948 | 4.541156 | 5.603817 | 0.017921 | 1        | 75  | 52  | 97  | 90  | 77  | 114 | 107 | 77  | 88  | 65  |
| Zfp236    | 0.427389 | 4.349056 | 4.282617 | 0.038504 | 1        | 88  | 70  | 71  | 128 | 69  | 89  | 98  | 121 | 85  | 94  |
| Yif1b     | 0.427313 | 4.203713 | 4.123245 | 0.042298 | 1        | 83  | 57  | 128 | 137 | 92  | 175 | 113 | 97  | 106 | 73  |
| Polr2i    | 0.423483 | 4.367937 | 4.356743 | 0.036863 | 1        | 44  | 43  | 88  | 82  | 49  | 82  | 96  | 68  | 60  | 42  |
| Kantr     | 0.421331 | 3.633957 | 4.379449 | 0.036375 | 1        | 49  | 43  | 77  | 71  | 57  | 70  | 77  | 60  | 80  | 52  |
| Kcnk10    | 0.421194 | 3.694793 | 5.326276 | 0.021006 | 1        | 83  | 76  | 96  | 107 | 98  | 123 | 115 | 128 | 91  | 76  |
| Itgav     | 0.419314 | 5.700134 | 6.193486 | 0.012822 | 1        | 132 | 83  | 146 | 136 | 144 | 185 | 142 | 118 | 167 | 124 |
| Pcdh1     | 0.419106 | 6.253054 | 4.339198 | 0.037244 | 1        | 51  | 26  | 29  | 41  | 33  | 48  | 27  | 38  | 55  | 39  |
| Elf2      | 0.418948 | 4.988395 | 6.297995 | 0.012087 | 0.9915   | 48  | 51  | 74  | 98  | 62  | 65  | 81  | 84  | 62  | 82  |
| Camk4     | 0.41765  | 3.770278 | 5.084784 | 0.024137 | 1        | 70  | 73  | 104 | 112 | 72  | 92  | 110 | 74  | 131 | 83  |
| Zbtb22    | 0.417103 | 3.797545 | 3.849596 | 0.049758 | 1        | 38  | 38  | 46  | 71  | 37  | 71  | 49  | 47  | 61  | 34  |
| Ptgifrn   | 0.413894 | 5.861908 | 5.973163 | 0.014525 | 1        | 83  | 71  | 95  | 102 | 53  | 123 | 90  | 112 | 72  | 64  |
| Gid4      | 0.412398 | 5.55091  | 10.52249 | 0.001179 | 0.403928 | 135 | 139 | 205 | 251 | 227 | 199 | 203 | 243 | 230 | 204 |
| Zbtb6     | 0.41219  | 4.474426 | 5.14789  | 0.023275 | 1        | 51  | 49  | 69  | 54  | 44  | 63  | 50  | 68  | 77  | 47  |
| Rad54l2   | 0.408756 | 4.511752 | 4.407852 | 0.035774 | 1        | 52  | 67  | 107 | 47  | 86  | 91  | 107 | 82  | 83  | 54  |
| Cdyl2     | 0.40683  | 3.781238 | 4.893834 | 0.026953 | 1        | 64  | 63  | 82  | 117 | 92  | 105 | 115 | 118 | 87  | 53  |
| Rps6kb2   | 0.404956 | 4.185669 | 4.602323 | 0.031929 | 1        | 42  | 54  | 65  | 82  | 63  | 78  | 56  | 86  | 80  | 47  |
| Srf       | 0.402772 | 5.04668  | 4.13319  | 0.04205  | 1        | 32  | 78  | 89  | 75  | 68  | 92  | 94  | 80  | 76  | 50  |
| Rab27b    | 0.400417 | 6.611819 | 15.3958  | 8.72E-05 | 0.164152 | 165 | 167 | 203 | 246 | 175 | 230 | 244 | 224 | 215 | 169 |
| Trim25    | 0.399353 | 6.367866 | 6.63747  | 0.009986 | 0.943727 | 57  | 54  | 71  | 53  | 55  | 73  | 88  | 71  | 63  | 37  |

|           |          |          |          |          |          |     |     |     |     |     |     |     |     |     |     |
|-----------|----------|----------|----------|----------|----------|-----|-----|-----|-----|-----|-----|-----|-----|-----|-----|
| Trim24    | 0.398302 | 5.253521 | 8.130815 | 0.004352 | 0.66061  | 85  | 84  | 151 | 117 | 113 | 128 | 140 | 124 | 123 | 103 |
| Rnf170    | 0.397554 | 4.50371  | 4.181673 | 0.040863 |          | 1   | 45  | 50  | 90  | 80  | 49  | 66  | 75  | 74  | 82  |
| Eps8      | 0.394736 | 5.373913 | 4.052245 | 0.044113 |          | 1   | 32  | 19  | 40  | 64  | 46  | 59  | 62  | 28  | 31  |
| Ss18      | 0.394661 | 5.096285 | 5.92813  | 0.014901 |          | 1   | 50  | 54  | 75  | 61  | 73  | 83  | 60  | 78  | 77  |
| Reep4     | 0.391474 | 6.983142 | 4.243239 | 0.039407 |          | 1   | 26  | 37  | 51  | 24  | 37  | 37  | 45  | 38  | 35  |
| Snhg9     | 0.382183 | 5.324278 | 4.989354 | 0.025504 |          | 1   | 116 | 92  | 194 | 155 | 67  | 163 | 147 | 151 | 143 |
| Rasgrp1   | 0.378717 | 4.959403 | 3.864507 | 0.049318 |          | 1   | 166 | 155 | 247 | 242 | 181 | 193 | 233 | 166 | 303 |
| Ebna1bp2  | 0.377332 | 5.514672 | 7.669035 | 0.005618 | 0.734833 | 126 |     | 102 | 139 | 165 | 146 | 164 | 160 | 132 | 186 |
| Mon1b     | 0.376313 | 4.252086 | 3.866163 | 0.049269 |          | 1   | 44  | 48  | 101 | 76  | 54  | 80  | 64  | 82  | 54  |
| Cacna2d3  | 0.370887 | 4.677597 | 4.731695 | 0.029612 |          | 1   | 146 | 148 | 194 | 234 | 196 | 214 | 224 | 197 | 222 |
| Sertad4   | 0.370801 | 4.798574 | 3.851255 | 0.049709 |          | 1   | 62  | 68  | 97  | 85  | 76  | 118 | 56  | 93  | 94  |
| Inpp5b    | 0.36355  | 3.916032 | 5.194236 | 0.022662 |          | 1   | 61  | 50  | 74  | 87  | 52  | 73  | 78  | 69  | 78  |
| Iffo2     | 0.36298  | 5.876058 | 4.445977 | 0.034984 |          | 1   | 47  | 54  | 42  | 82  | 77  | 51  | 87  | 64  | 76  |
| Ddn       | 0.361522 | 4.336503 | 4.047526 | 0.044236 |          | 1   | 116 | 98  | 145 | 246 | 153 | 150 | 150 | 193 | 170 |
| Wbp1l     | 0.359341 | 5.839386 | 7.719196 | 0.005464 | 0.725022 | 100 | 81  | 144 | 147 | 96  | 112 | 145 | 135 | 132 | 95  |
| Llph      | 0.357112 | 5.246468 | 3.879893 | 0.048868 |          | 1   | 60  | 51  | 63  | 87  | 101 | 91  | 94  | 91  | 81  |
| Ctdspl    | 0.355317 | 6.364332 | 6.733025 | 0.009464 | 0.931074 | 105 | 101 | 135 | 150 | 111 | 174 | 124 | 135 | 144 | 85  |
| Dpp8      | 0.353859 | 5.822675 | 5.878003 | 0.015331 |          | 1   | 216 | 162 | 282 | 294 | 159 | 188 | 261 | 243 | 224 |
| Fam160a2  | 0.350927 | 5.220051 | 5.319093 | 0.021093 |          | 1   | 137 | 68  | 144 | 98  | 107 | 108 | 118 | 139 | 124 |
| Nudt7     | 0.348032 | 4.365945 | 5.248417 | 0.021967 |          | 1   | 47  | 56  | 123 | 120 | 68  | 92  | 111 | 89  | 85  |
| Rnf4      | 0.34716  | 5.167215 | 4.787523 | 0.028667 |          | 1   | 123 | 86  | 137 | 187 | 105 | 151 | 160 | 167 | 134 |
| Zcchc2    | 0.345077 | 4.820974 | 4.440276 | 0.035101 |          | 1   | 65  | 52  | 122 | 95  | 69  | 76  | 119 | 70  | 86  |
| Zdhhc22   | 0.341435 | 4.504954 | 3.950564 | 0.046856 |          | 1   | 130 | 165 | 174 | 234 | 162 | 178 | 139 | 212 | 215 |
| Stag1     | 0.334736 | 5.314926 | 4.490716 | 0.034079 |          | 1   | 114 | 66  | 105 | 141 | 91  | 138 | 109 | 82  | 133 |
| Gstm1     | 0.333563 | 5.473224 | 5.19665  | 0.02263  |          | 1   | 119 | 119 | 125 | 191 | 138 | 159 | 151 | 144 | 174 |
| Ephx1     | 0.323881 | 6.072705 | 6.06027  | 0.013826 |          | 1   | 107 | 157 | 250 | 254 | 161 | 205 | 196 | 195 | 230 |
| Otud3     | 0.320686 | 4.706536 | 4.975122 | 0.025714 |          | 1   | 97  | 66  | 138 | 126 | 105 | 111 | 150 | 114 | 104 |
| Setd1b    | 0.320159 | 6.17278  | 5.881489 | 0.015301 |          | 1   | 165 | 149 | 225 | 196 | 232 | 179 | 253 | 235 | 229 |
| Zfp120    | 0.320134 | 4.419133 | 3.849234 | 0.049769 |          | 1   | 50  | 39  | 67  | 90  | 74  | 60  | 68  | 74  | 72  |
| 1190002N  | 0.319874 | 4.260906 | 3.986904 | 0.045855 |          | 1   | 100 | 80  | 143 | 133 | 131 | 142 | 113 | 138 | 132 |
| Arid5b    | 0.318608 | 7.382408 | 3.869055 | 0.049184 |          | 1   | 235 | 216 | 255 | 249 | 350 | 255 | 339 | 291 | 245 |
| Mcm3ap    | 0.317931 | 4.67509  | 4.24768  | 0.039304 |          | 1   | 87  | 84  | 144 | 111 | 96  | 144 | 82  | 110 | 111 |
| Parp4     | 0.315299 | 5.897495 | 5.331621 | 0.020942 |          | 1   | 107 | 106 | 124 | 155 | 105 | 105 | 150 | 124 | 158 |
| Snapc5    | 0.314547 | 5.204268 | 4.569774 | 0.032541 |          | 1   | 125 | 145 | 167 | 236 | 186 | 193 | 158 | 208 | 195 |
| Pnrc2     | 0.312358 | 5.473726 | 3.950498 | 0.046857 |          | 1   | 81  | 86  | 139 | 115 | 91  | 105 | 102 | 115 | 117 |
| Pwwp2a    | 0.309126 | 5.842525 | 4.525344 | 0.033396 |          | 1   | 102 | 111 | 110 | 121 | 124 | 119 | 117 | 129 | 143 |
| Uvrq      | 0.30615  | 4.7947   | 4.227239 | 0.03978  |          | 1   | 80  | 93  | 94  | 135 | 103 | 105 | 109 | 98  | 105 |
| Osgep     | 0.303499 | 4.73399  | 4.276253 | 0.038648 |          | 1   | 74  | 71  | 81  | 98  | 75  | 75  | 92  | 100 | 95  |
| Phf20     | 0.302238 | 5.481313 | 6.526133 | 0.01063  | 0.954012 | 235 | 230 | 334 | 354 | 276 | 267 | 308 | 312 | 333 | 277 |
| Rims3     | 0.301665 | 5.382683 | 6.038745 | 0.013995 |          | 1   | 245 | 286 | 430 | 488 | 295 | 339 | 365 | 415 | 334 |
| Lrrc8b    | 0.300895 | 6.133931 | 5.558273 | 0.018394 |          | 1   | 115 | 114 | 184 | 156 | 167 | 182 | 144 | 149 | 167 |
| Spns1     | 0.30085  | 4.47726  | 4.019555 | 0.044976 |          | 1   | 91  | 86  | 144 | 114 | 110 | 109 | 147 | 106 | 129 |
| Pdpr      | 0.297424 | 6.842843 | 3.990971 | 0.045745 |          | 1   | 102 | 203 | 232 | 215 | 146 | 163 | 208 | 216 | 216 |
| Fam219a   | 0.294791 | 5.911605 | 5.055905 | 0.024542 |          | 1   | 443 | 352 | 513 | 521 | 399 | 514 | 443 | 441 | 636 |
| Cep104    | 0.293692 | 4.79796  | 4.056396 | 0.044004 |          | 1   | 166 | 107 | 167 | 153 | 147 | 180 | 159 | 175 | 159 |
| Zdhhc17   | 0.291377 | 5.185676 | 5.679081 | 0.017168 |          | 1   | 214 | 203 | 299 | 316 | 247 | 244 | 283 | 287 | 281 |
| Lin7c     | 0.286996 | 6.216944 | 5.620219 | 0.017754 |          | 1   | 131 | 137 | 231 | 245 | 153 | 230 | 166 | 191 | 210 |
| Zfp322a   | 0.283168 | 5.330954 | 5.987834 | 0.014405 |          | 1   | 151 | 139 | 207 | 239 | 173 | 155 | 217 | 185 | 209 |
| Snrpd3    | 0.282364 | 7.420267 | 4.956616 | 0.025991 |          | 1   | 489 | 442 | 684 | 642 | 454 | 553 | 577 | 567 | 630 |
| Pygo2     | 0.280663 | 5.979636 | 5.189519 | 0.022724 |          | 1   | 201 | 153 | 343 | 287 | 206 | 284 | 233 | 297 | 236 |
| Ston2     | 0.278535 | 5.731797 | 5.573724 | 0.018232 |          | 1   | 144 | 106 | 170 | 191 | 127 | 157 | 145 | 144 | 181 |
| Syne2     | 0.278218 | 7.990027 | 4.039793 | 0.044439 |          | 1   | 228 | 118 | 270 | 270 | 247 | 224 | 213 | 212 | 268 |
| Gabbr2    | 0.275821 | 5.824978 | 4.112014 | 0.04258  |          | 1   | 462 | 290 | 516 | 403 | 386 | 425 | 408 | 383 | 499 |
| Kdm5c     | 0.274649 | 5.698289 | 5.740224 | 0.016581 |          | 1   | 131 | 91  | 231 | 188 | 118 | 142 | 188 | 142 | 156 |
| Nptx1     | 0.27269  | 6.035924 | 6.193574 | 0.012822 |          | 1   | 406 | 389 | 667 | 820 | 471 | 522 | 662 | 544 | 652 |
| Slc4a1ap  | 0.269384 | 5.436537 | 4.109334 | 0.042647 |          | 1   | 145 | 136 | 167 | 235 | 165 | 187 | 153 | 159 | 199 |
| Eif6      | 0.262138 | 6.942821 | 5.348699 | 0.020738 |          | 1   | 272 | 146 | 350 | 265 | 205 | 255 | 286 | 301 | 254 |
| Hif1a     | 0.257859 | 6.772225 | 4.682006 | 0.03048  |          | 1   | 220 | 194 | 301 | 279 | 213 | 209 | 309 | 219 | 286 |
| Tmem178t  | 0.250889 | 5.064478 | 4.236688 | 0.039559 |          | 1   | 218 | 165 | 281 | 311 | 225 | 225 | 237 | 237 | 282 |
| Jade2     | 0.249004 | 5.15291  | 4.148825 | 0.041663 |          | 1   | 143 | 107 | 167 | 150 | 116 | 164 | 136 | 133 | 157 |
| Mcmbp     | 0.245098 | 5.574388 | 3.851397 | 0.049705 |          | 1   | 113 | 75  | 131 | 112 | 84  | 116 | 120 | 104 | 108 |
| Sf3a1     | 0.24212  | 5.722795 | 4.58906  | 0.032177 |          | 1   | 163 | 165 | 215 | 210 | 141 | 206 | 166 | 191 | 176 |
| Man2a2    | 0.238785 | 5.454382 | 3.937799 | 0.047213 |          | 1   | 217 | 219 | 266 | 305 | 231 | 257 | 260 | 256 | 282 |
| Plaa      | 0.237969 | 5.34894  | 4.949507 | 0.026098 |          | 1   | 216 | 195 | 256 | 241 | 233 | 269 | 232 | 234 | 237 |
| 3830406C1 | 0.230311 | 6.17337  | 3.876411 | 0.048969 |          | 1   | 258 | 265 | 327 | 335 | 285 | 231 | 375 | 304 | 334 |
| Pank3     | 0.222806 | 7.127521 | 5.007044 | 0.025244 |          | 1   | 392 | 439 | 688 | 674 | 484 | 500 | 567 | 596 | 590 |
| Uso1      | 0.212678 | 6.532595 | 4.66641  | 0.030758 |          | 1   | 305 | 219 | 456 | 366 | 318 | 356 | 334 | 296 | 364 |
| Myh9      | 0.202737 | 8.412473 | 4.247227 | 0.039314 |          | 1   | 675 | 514 | 690 | 669 | 564 | 591 | 629 | 601 | 749 |

| Lgals8                     | 0.19999  | 6.540515 | 4.118967 | 0.042405 | 1        | 396 | 412 | 671 | 613 | 462 | 475 | 608 | 511 | 473 | 425 |
|----------------------------|----------|----------|----------|----------|----------|-----|-----|-----|-----|-----|-----|-----|-----|-----|-----|
| <b>Downregulated genes</b> |          |          |          |          |          |     |     |     |     |     |     |     |     |     |     |
| Stk31                      | -5.07878 | -0.5391  | 8.782283 | 0.003042 | 0.571673 | 0   | 0   | 12  | 10  | 4   | 0   | 0   | 0   | 0   | 0   |
| Gm5432                     | -5.00477 | -0.27179 | 11.01131 | 0.000906 | 0.374472 | 5   | 4   | 11  | 2   | 0   | 0   | 0   | 0   | 0   | 0   |
| Snx22                      | -5.00141 | -0.33204 | 11.58094 | 0.000666 | 0.348951 | 10  | 1   | 0   | 7   | 3   | 0   | 0   | 0   | 0   | 0   |
| Gm13056                    | -4.9695  | 1.667378 | 20.10062 | 7.35E-06 | 0.063459 | 0   | 5   | 11  | 0   | 5   | 0   | 0   | 0   | 0   | 0   |
| Fer1f6                     | -4.76279 | -0.52716 | 8.294291 | 0.003977 | 0.63308  | 11  | 0   | 2   | 5   | 0   | 0   | 0   | 0   | 0   | 0   |
| Gm31989                    | -4.75588 | 0.232037 | 12.53246 | 0.0004   | 0.275262 | 7   | 0   | 6   | 6   | 0   | 0   | 0   | 0   | 0   | 0   |
| LOC108161                  | -4.69473 | -0.53603 | 6.270346 | 0.012278 | 0.9915   | 3   | 0   | 0   | 17  | 0   | 0   | 0   | 0   | 0   | 0   |
| Gm33947                    | -4.67659 | -0.12622 | 8.776741 | 0.003051 | 0.571673 | 0   | 11  | 4   | 0   | 0   | 0   | 0   | 0   | 0   | 0   |
| Gm16299                    | -4.67504 | -0.13527 | 8.905545 | 0.002843 | 0.552875 | 0   | 0   | 7   | 4   | 7   | 0   | 0   | 0   | 0   | 0   |
| Gm20383                    | -4.67165 | 4.071774 | 20.08064 | 7.42E-06 | 0.063459 | 0   | 0   | 3   | 4   | 10  | 0   | 0   | 0   | 0   | 0   |
| Stk32b                     | -4.63876 | -0.6756  | 7.029265 | 0.008019 | 0.858587 | 2   | 0   | 0   | 8   | 7   | 0   | 0   | 0   | 0   | 0   |
| Rnf43                      | -4.62526 | 2.47538  | 18.34187 | 1.85E-05 | 0.094877 | 0   | 0   | 0   | 13  | 4   | 0   | 0   | 0   | 0   | 0   |
| Gm16068                    | -4.61174 | 0.738343 | 12.17384 | 0.000485 | 0.28583  | 0   | 5   | 0   | 12  | 0   | 0   | 0   | 0   | 0   | 0   |
| Tph1                       | -4.5823  | -0.56429 | 5.150252 | 0.023243 | 1        | 0   | 0   | 15  | 0   | 3   | 0   | 0   | 0   | 0   | 0   |
| Krt79                      | -4.57058 | -0.37572 | 12.6486  | 0.000376 | 0.274974 | 3   | 0   | 9   | 4   | 1   | 0   | 0   | 0   | 0   | 0   |
| Mir98                      | -4.54898 | 0.620351 | 11.4238  | 0.000725 | 0.348954 | 5   | 2   | 5   | 0   | 3   | 0   | 0   | 0   | 0   | 0   |
| Gm35315                    | -4.49888 | -0.05644 | 12.63065 | 0.000379 | 0.274974 | 1   | 4   | 4   | 4   | 2   | 0   | 0   | 0   | 0   | 0   |
| Hsd17b1                    | -4.46206 | -0.39069 | 5.310125 | 0.021202 | 1        | 0   | 5   | 5   | 5   | 0   | 0   | 0   | 0   | 0   | 0   |
| Gm36090                    | -4.46051 | -0.71999 | 5.308743 | 0.021219 | 1        | 4   | 8   | 0   | 0   | 0   | 0   | 0   | 0   | 0   | 0   |
| Tgm1                       | -4.439   | 1.948849 | 16.33111 | 5.32E-05 | 0.152284 | 0   | 0   | 10  | 5   | 0   | 0   | 0   | 0   | 0   | 0   |
| Gm39937                    | -4.42291 | -0.37173 | 7.839435 | 0.005112 | 0.721193 | 8   | 0   | 1   | 0   | 4   | 0   | 0   | 0   | 0   | 0   |
| Aspdh                      | -4.42193 | -0.60711 | 6.185884 | 0.012877 | 1        | 7   | 1   | 6   | 0   | 0   | 0   | 0   | 0   | 0   | 0   |
| Gm11413                    | -4.41026 | -0.69056 | 8.602851 | 0.003356 | 0.584254 | 7   | 1   | 1   | 5   | 0   | 0   | 0   | 0   | 0   | 0   |
| 0610009EC                  | -4.38261 | -0.38831 | 10.42857 | 0.001241 | 0.403928 | 0   | 3   | 3   | 5   | 3   | 0   | 0   | 0   | 0   | 0   |
| Ccdc108                    | -4.37582 | -0.7415  | 4.263352 | 0.038943 | 1        | 10  | 0   | 0   | 3   | 0   | 0   | 0   | 0   | 0   | 0   |
| Gm36188                    | -4.37235 | -0.48281 | 7.04122  | 0.007965 | 0.858587 | 0   | 3   | 0   | 8   | 3   | 0   | 0   | 0   | 0   | 0   |
| Stox1                      | -4.36565 | -0.51007 | 8.417627 | 0.003716 | 0.610501 | 3   | 7   | 2   | 0   | 0   | 0   | 0   | 0   | 0   | 0   |
| Gm40768                    | -4.35873 | -0.43687 | 6.939756 | 0.00843  | 0.892    | 0   | 2   | 0   | 0   | 10  | 0   | 0   | 0   | 0   | 0   |
| Tnn                        | -4.34475 | -0.44229 | 5.258641 | 0.021838 | 1        | 0   | 2   | 10  | 3   | 0   | 0   | 0   | 0   | 0   | 0   |
| Gm36673                    | -4.33267 | -0.44864 | 5.045263 | 0.024693 | 1        | 0   | 0   | 8   | 8   | 0   | 0   | 0   | 0   | 0   | 0   |
| Gm21283                    | -4.29989 | -0.75875 | 6.488528 | 0.010857 | 0.962073 | 3   | 5   | 4   | 0   | 0   | 0   | 0   | 0   | 0   | 0   |
| Gm15420                    | -4.29199 | -0.2586  | 7.731054 | 0.005428 | 0.725022 | 0   | 3   | 0   | 11  | 0   | 0   | 0   | 0   | 0   | 0   |
| LOC102631                  | -4.28947 | -0.63742 | 9.400487 | 0.002169 | 0.493936 | 4   | 2   | 0   | 2   | 4   | 0   | 0   | 0   | 0   | 0   |
| A1cf                       | -4.28098 | -0.64433 | 5.4884   | 0.019143 | 1        | 1   | 0   | 7   | 7   | 0   | 0   | 0   | 0   | 0   | 0   |
| Gm11713                    | -4.25363 | 0.283078 | 9.943164 | 0.001614 | 0.427077 | 5   | 0   | 8   | 0   | 0   | 0   | 0   | 0   | 0   | 0   |
| Mir6935                    | -4.24956 | -0.73094 | 4.274138 | 0.038697 | 1        | 0   | 0   | 11  | 4   | 0   | 0   | 0   | 0   | 0   | 0   |
| Gm31672                    | -4.24863 | -0.56222 | 5.792699 | 0.016093 | 1        | 6   | 0   | 0   | 7   | 0   | 0   | 0   | 0   | 0   | 0   |
| Tsx                        | -4.24455 | -0.65896 | 6.426528 | 0.011243 | 0.980859 | 0   | 2   | 1   | 7   | 3   | 0   | 0   | 0   | 0   | 0   |
| Fgr                        | -4.23818 | -0.61008 | 6.712534 | 0.009574 | 0.931074 | 0   | 1   | 4   | 4   | 4   | 0   | 0   | 0   | 0   | 0   |
| 9030624G                   | -4.22438 | -0.73934 | 5.101471 | 0.023906 | 1        | 5   | 0   | 0   | 0   | 6   | 0   | 0   | 0   | 0   | 0   |
| Gm30635                    | -4.21222 | 2.281973 | 12.7077  | 0.000364 | 0.274974 | 0   | 3   | 5   | 0   | 4   | 0   | 0   | 0   | 0   | 0   |
| Hist1h4n                   | -4.19461 | 0.131978 | 9.850549 | 0.001698 | 0.433195 | 0   | 0   | 4   | 6   | 3   | 0   | 0   | 0   | 0   | 0   |
| Gm40255                    | -4.18572 | -0.60673 | 10.3781  | 0.001275 | 0.406402 | 3   | 1   | 5   | 1   | 2   | 0   | 0   | 0   | 0   | 0   |
| Klk10                      | -4.16562 | 2.99083  | 13.47727 | 0.000241 | 0.247537 | 0   | 0   | 9   | 0   | 3   | 0   | 0   | 0   | 0   | 0   |
| Tmem239                    | -4.16426 | -0.71263 | 5.365035 | 0.020544 | 1        | 0   | 0   | 9   | 5   | 0   | 0   | 0   | 0   | 0   | 0   |
| Tmem184a                   | -4.16385 | 4.69872  | 14.07326 | 0.000176 | 0.218121 | 0   | 0   | 0   | 12  | 0   | 0   | 0   | 0   | 0   | 0   |
| Oc90                       | -4.13742 | -0.74467 | 5.08886  | 0.02408  | 1        | 0   | 5   | 0   | 1   | 4   | 0   | 0   | 0   | 0   | 0   |
| Gm31284                    | -4.10008 | -0.72429 | 6.132267 | 0.013274 | 1        | 5   | 0   | 4   | 0   | 2   | 0   | 0   | 0   | 0   | 0   |
| Rmi2                       | -4.09544 | 1.177399 | 11.95517 | 0.000545 | 0.316218 | 0   | 0   | 4   | 8   | 0   | 0   | 0   | 0   | 0   | 0   |
| Gm31633                    | -4.08802 | 0.466103 | 9.807353 | 0.001738 | 0.440365 | 7   | 0   | 0   | 4   | 0   | 0   | 0   | 0   | 0   | 0   |
| Nr0b2                      | -4.08619 | -0.42303 | 7.264714 | 0.007032 | 0.813479 | 3   | 0   | 0   | 4   | 4   | 0   | 0   | 0   | 0   | 0   |
| Gm30075                    | -4.0851  | -0.42814 | 7.174713 | 0.007394 | 0.833857 | 0   | 2   | 10  | 0   | 0   | 0   | 0   | 0   | 0   | 0   |
| Gm36906                    | -4.08359 | 0.242228 | 10.22112 | 0.001388 | 0.406676 | 0   | 5   | 0   | 6   | 0   | 0   | 0   | 0   | 0   | 0   |
| Ugt1a5                     | -4.07217 | 0.329609 | 9.122077 | 0.002525 | 0.532993 | 0   | 0   | 6   | 4   | 2   | 0   | 0   | 0   | 0   | 0   |
| 2200002J2                  | -4.07153 | -0.3246  | 7.624829 | 0.005757 | 0.735366 | 5   | 2   | 0   | 1   | 2   | 0   | 0   | 0   | 0   | 0   |
| Gm34998                    | -4.06857 | -0.76255 | 4.054787 | 0.044046 | 1        | 3   | 0   | 9   | 0   | 0   | 0   | 0   | 0   | 0   | 0   |
| Gm38797                    | -4.06784 | -0.70834 | 7.72804  | 0.005437 | 0.725022 | 2   | 2   | 6   | 0   | 1   | 0   | 0   | 0   | 0   | 0   |
| Gm40675                    | -4.05844 | -0.43839 | 5.510911 | 0.018898 | 1        | 2   | 0   | 3   | 6   | 1   | 0   | 0   | 0   | 0   | 0   |
| Gm40506                    | -4.05708 | -0.74573 | 5.894569 | 0.015188 | 1        | 3   | 0   | 1   | 8   | 0   | 0   | 0   | 0   | 0   | 0   |
| LOC108161                  | -4.0408  | 0.9503   | 10.46398 | 0.001217 | 0.403928 | 0   | 2   | 0   | 0   | 8   | 0   | 0   | 0   | 0   | 0   |
| 4930463O                   | -4.03801 | -0.76563 | 3.981434 | 0.046004 | 1        | 0   | 0   | 3   | 10  | 0   | 0   | 0   | 0   | 0   | 0   |
| Gm41228                    | -4.03334 | -0.81164 | 3.88805  | 0.048631 | 1        | 5   | 4   | 0   | 0   | 0   | 0   | 0   | 0   | 0   | 0   |
| LOC108161                  | -4.01445 | 0.076658 | 8.211224 | 0.004163 | 0.648379 | 0   | 0   | 7   | 0   | 4   | 0   | 0   | 0   | 0   | 0   |
| Gm10640                    | -4.01098 | -0.30066 | 8.831704 | 0.00296  | 0.563513 | 2   | 3   | 17  | 8   | 2   | 0   | 0   | 0   | 1   | 0   |
| LOC105241                  | -4.00534 | -0.51656 | 6.896413 | 0.008637 | 0.905891 | 4   | 0   | 5   | 2   | 0   | 0   | 0   | 0   | 0   | 0   |
| Snord42a                   | -4.00271 | -0.58699 | 5.595418 | 0.018008 | 1        | 6   | 1   | 0   | 3   | 0   | 0   | 0   | 0   | 0   | 0   |



|           |          |          |          |          |          |   |   |    |    |    |   |   |   |   |   |
|-----------|----------|----------|----------|----------|----------|---|---|----|----|----|---|---|---|---|---|
| Gm38566   | -4.00199 | -0.44451 | 4.68674  | 0.030396 | 1        | 0 | 0 | 11 | 0  | 1  | 0 | 0 | 0 | 0 | 0 |
| LOC108163 | -3.97036 | -0.57713 | 7.931563 | 0.004858 | 0.698042 | 1 | 0 | 1  | 7  | 2  | 0 | 0 | 0 | 0 | 0 |
| Krt26     | -3.96941 | -0.70614 | 8.376419 | 0.003801 | 0.610501 | 0 | 4 | 2  | 3  | 1  | 0 | 0 | 0 | 0 | 0 |
| Mir684-2  | -3.96123 | -0.64443 | 3.944696 | 0.047019 |          | 1 | 3 | 0  | 8  | 0  | 0 | 0 | 0 | 0 | 0 |
| Gm42064   | -3.94792 | -0.77484 | 4.602135 | 0.031932 |          | 1 | 3 | 0  | 0  | 0  | 6 | 0 | 0 | 0 | 0 |
| Defb20    | -3.9451  | -0.6944  | 4.939329 | 0.026252 |          | 1 | 0 | 0  | 3  | 9  | 0 | 0 | 0 | 0 | 0 |
| Gm35029   | -3.94234 | -0.04812 | 6.805917 | 0.009086 | 0.923346 | 0 | 1 | 0  | 0  | 8  | 0 | 0 | 0 | 0 | 0 |
| Arhgap9   | -3.91426 | -0.65555 | 7.360365 | 0.006668 | 0.791677 | 1 | 0 | 1  | 4  | 4  | 0 | 0 | 0 | 0 | 0 |
| LOC108163 | -3.90365 | -0.3026  | 6.062123 | 0.013811 |          | 1 | 3 | 0  | 1  | 0  | 5 | 0 | 0 | 0 | 0 |
| LOC102633 | -3.89557 | -0.69355 | 5.644949 | 0.017506 |          | 1 | 0 | 1  | 2  | 8  | 0 | 0 | 0 | 0 | 0 |
| 4930568G  | -3.89517 | -0.67564 | 4.908328 | 0.026728 |          | 1 | 1 | 0  | 10 | 0  | 0 | 0 | 0 | 0 | 0 |
| Il5ra     | -3.89167 | -0.74542 | 4.564687 | 0.032638 |          | 1 | 1 | 0  | 10 | 0  | 0 | 0 | 0 | 0 | 0 |
| Xist      | -3.87333 | -0.36598 | 5.594094 | 0.018021 |          | 1 | 1 | 0  | 0  | 10 | 0 | 0 | 0 | 0 | 0 |
| Gm40250   | -3.87219 | -0.70829 | 5.766308 | 0.016336 |          | 1 | 3 | 0  | 0  | 6  | 1 | 0 | 0 | 0 | 0 |
| Gm32024   | -3.85875 | -0.70679 | 5.92638  | 0.014916 |          | 1 | 2 | 1  | 2  | 5  | 0 | 0 | 0 | 0 | 0 |
| Gm31805   | -3.85094 | -0.74473 | 5.938471 | 0.014814 |          | 1 | 0 | 0  | 6  | 1  | 3 | 0 | 0 | 0 | 0 |
| Bglap     | -3.8459  | -0.64539 | 4.375427 | 0.036461 |          | 1 | 0 | 0  | 9  | 2  | 0 | 0 | 0 | 0 | 0 |
| Ifitm5    | -3.84137 | -0.38923 | 7.973891 | 0.004746 | 0.69686  | 0 | 0 | 5  | 3  | 2  | 0 | 0 | 0 | 0 | 0 |
| Cacng1    | -3.83738 | -0.84948 | 5.468738 | 0.01936  |          | 1 | 3 | 3  | 0  | 2  | 0 | 0 | 0 | 0 | 0 |
| Gm36789   | -3.8352  | -0.83061 | 5.612225 | 0.017836 |          | 1 | 3 | 3  | 0  | 0  | 2 | 0 | 0 | 0 | 0 |
| Gm31560   | -3.83518 | -0.51708 | 4.764004 | 0.029061 |          | 1 | 0 | 0  | 4  | 7  | 0 | 0 | 0 | 0 | 0 |
| 4930505A  | -3.83009 | -0.75932 | 7.130757 | 0.007577 | 0.846584 | 1 | 2 | 4  | 0  | 2  | 0 | 0 | 0 | 0 | 0 |
| Gm13025   | -3.82952 | -0.79841 | 5.387541 | 0.020281 |          | 1 | 0 | 2  | 1  | 7  | 0 | 0 | 0 | 0 | 0 |
| 1700097N  | -3.82134 | -0.68907 | 7.053347 | 0.007912 | 0.858587 | 3 | 2 | 0  | 4  | 0  | 0 | 0 | 0 | 0 | 0 |
| Gm39664   | -3.81696 | -0.4205  | 5.156227 | 0.023163 |          | 1 | 0 | 2  | 0  | 6  | 0 | 0 | 0 | 0 | 0 |
| Gm4432    | -3.81304 | 0.20365  | 8.46756  | 0.003615 | 0.610211 | 1 | 1 | 4  | 0  | 3  | 0 | 0 | 0 | 0 | 0 |
| Scd4      | -3.80854 | 0.751108 | 9.902768 | 0.00165  | 0.430212 | 0 | 1 | 4  | 0  | 4  | 0 | 0 | 0 | 0 | 0 |
| Gm32647   | -3.79852 | -0.7932  | 5.733395 | 0.016645 |          | 1 | 5 | 1  | 0  | 0  | 2 | 0 | 0 | 0 | 0 |
| Gm38523   | -3.79116 | 0.136373 | 7.896904 | 0.004952 | 0.704155 | 0 | 4 | 0  | 0  | 4  | 0 | 0 | 0 | 0 | 0 |
| Gm33305   | -3.79099 | -0.39081 | 5.88331  | 0.015285 |          | 1 | 1 | 3  | 1  | 0  | 3 | 0 | 0 | 0 | 0 |
| Gm33185   | -3.78855 | -0.66059 | 6.810165 | 0.009064 | 0.923346 | 0 | 0 | 4  | 5  | 1  | 0 | 0 | 0 | 0 | 0 |
| 4930565N  | -3.78426 | -0.21061 | 5.744867 | 0.016537 |          | 1 | 8 | 0  | 0  | 0  | 0 | 0 | 0 | 0 | 0 |
| Gm31344   | -3.76707 | -0.54029 | 6.506823 | 0.010746 | 0.95735  | 1 | 2 | 6  | 0  | 0  | 0 | 0 | 0 | 0 | 0 |
| Zglp1     | -3.75559 | -0.17282 | 5.770936 | 0.016293 |          | 1 | 0 | 0  | 3  | 2  | 4 | 0 | 0 | 0 | 0 |
| Ncaph     | -3.74674 | 1.82745  | 9.876356 | 0.001674 | 0.430212 | 0 | 0 | 5  | 4  | 0  | 0 | 0 | 0 | 0 | 0 |
| Stmnd1    | -3.73845 | -0.7086  | 7.730745 | 0.005429 | 0.725022 | 1 | 0 | 2  | 4  | 2  | 0 | 0 | 0 | 0 | 0 |
| Gm29863   | -3.72048 | -0.83214 | 5.11761  | 0.023684 |          | 1 | 0 | 1  | 2  | 5  | 0 | 0 | 0 | 0 | 0 |
| Gm42306   | -3.71898 | -0.64141 | 4.923164 | 0.026499 |          | 1 | 0 | 2  | 6  | 1  | 0 | 0 | 0 | 0 | 0 |
| Amelx     | -3.71581 | -0.64002 | 3.84629  | 0.049856 |          | 1 | 0 | 0  | 8  | 2  | 0 | 0 | 0 | 0 | 0 |
| Gpr63     | -3.70875 | -0.51657 | 4.544196 | 0.033031 |          | 1 | 0 | 0  | 3  | 7  | 0 | 0 | 0 | 0 | 0 |
| 5033426O  | -3.70209 | -0.77687 | 5.902706 | 0.015118 |          | 1 | 3 | 2  | 3  | 0  | 0 | 0 | 0 | 0 | 0 |
| Gm11735   | -3.70134 | 2.408161 | 9.206748 | 0.002411 | 0.519443 | 3 | 4 | 1  | 0  | 0  | 0 | 0 | 0 | 0 | 0 |
| Gps1      | -3.69834 | -0.54661 | 4.596768 | 0.032032 |          | 1 | 2 | 0  | 0  | 2  | 4 | 0 | 0 | 0 | 0 |
| Tssk1     | -3.68499 | -0.37596 | 4.865814 | 0.027394 |          | 1 | 0 | 6  | 1  | 0  | 0 | 0 | 0 | 0 | 0 |
| Gm40820   | -3.67952 | -0.79726 | 4.430504 | 0.035302 |          | 1 | 1 | 0  | 7  | 0  | 1 | 0 | 0 | 0 | 0 |
| Muc2      | -3.67233 | -0.50017 | 4.557809 | 0.032769 |          | 1 | 1 | 3  | 0  | 4  | 0 | 0 | 0 | 0 | 0 |
| Ankrd1    | -3.66099 | 0.39484  | 8.230617 | 0.004119 | 0.644276 | 5 | 0 | 3  | 0  | 0  | 0 | 0 | 0 | 0 | 0 |
| Gm28874   | -3.65186 | -0.52679 | 5.128671 | 0.023534 |          | 1 | 2 | 0  | 4  | 0  | 0 | 0 | 0 | 0 | 0 |
| Sntg2     | -3.64495 | -0.42973 | 5.455236 | 0.01951  |          | 1 | 9 | 0  | 12 | 0  | 2 | 0 | 0 | 1 | 0 |
| Ms4a4c    | -3.64302 | -0.59032 | 6.041129 | 0.013976 |          | 1 | 0 | 3  | 5  | 0  | 0 | 0 | 0 | 0 | 0 |
| Majin     | -3.64237 | 1.08175  | 8.939408 | 0.002791 | 0.552875 | 4 | 0 | 4  | 0  | 0  | 0 | 0 | 0 | 0 | 0 |
| Gm2814    | -3.63533 | 1.159087 | 8.849298 | 0.002932 | 0.561798 | 2 | 0 | 0  | 4  | 2  | 0 | 0 | 0 | 0 | 0 |
| Gm15326   | -3.63024 | -0.16227 | 6.553029 | 0.010471 | 0.954012 | 0 | 3 | 1  | 4  | 0  | 0 | 0 | 0 | 0 | 0 |
| Ccdc178   | -3.62672 | -0.70868 | 5.863798 | 0.015455 |          | 1 | 1 | 0  | 4  | 0  | 3 | 0 | 0 | 0 | 0 |
| Esrp2     | -3.62513 | 3.864093 | 9.40562  | 0.002163 | 0.493936 | 0 | 1 | 0  | 7  | 0  | 0 | 0 | 0 | 0 | 0 |
| Ly6g      | -3.62379 | -0.85247 | 5.631409 | 0.017641 |          | 1 | 4 | 0  | 2  | 2  | 0 | 0 | 0 | 0 | 0 |
| Klk13     | -3.61969 | -0.61698 | 5.224101 | 0.022276 |          | 1 | 4 | 1  | 0  | 0  | 2 | 0 | 0 | 0 | 0 |
| Gm41862   | -3.6155  | -0.45716 | 5.262443 | 0.02179  |          | 1 | 4 | 0  | 0  | 4  | 0 | 0 | 0 | 0 | 0 |
| Sstr5     | -3.60541 | -0.60511 | 5.048256 | 0.024651 |          | 1 | 0 | 2  | 0  | 5  | 1 | 0 | 0 | 0 | 0 |
| Dlk2      | -3.60384 | 0.695791 | 7.49945  | 0.006172 | 0.759767 | 0 | 5 | 0  | 0  | 2  | 0 | 0 | 0 | 0 | 0 |
| Pdilt     | -3.60175 | -0.05568 | 5.381826 | 0.020348 |          | 1 | 7 | 0  | 0  | 0  | 0 | 0 | 0 | 0 | 0 |
| Gm42123   | -3.59932 | -0.29347 | 4.54194  | 0.033074 |          | 1 | 0 | 0  | 0  | 7  | 0 | 0 | 0 | 0 | 0 |
| Tmem190   | -3.59778 | 0.480331 | 8.23448  | 0.00411  | 0.644276 | 1 | 1 | 0  | 6  | 0  | 0 | 0 | 0 | 0 | 0 |
| Gm35678   | -3.56812 | -0.55595 | 4.312508 | 0.037833 |          | 1 | 3 | 0  | 1  | 4  | 0 | 0 | 0 | 0 | 0 |
| Slc10a5   | -3.56551 | -0.19063 | 4.446588 | 0.034971 |          | 1 | 0 | 0  | 0  | 9  | 0 | 0 | 0 | 0 | 0 |
| Gm31764   | -3.56511 | -0.67957 | 4.871627 | 0.027302 |          | 1 | 1 | 0  | 0  | 5  | 2 | 0 | 0 | 0 | 0 |
| Gm10754   | -3.56353 | -0.722   | 4.535657 | 0.033196 |          | 1 | 3 | 2  | 2  | 0  | 0 | 0 | 0 | 0 | 0 |
| Gm15521   | -3.53505 | -0.6561  | 5.641129 | 0.017544 |          | 1 | 0 | 0  | 1  | 5  | 2 | 0 | 0 | 0 | 0 |

|           |          |          |          |          |          |   |   |    |    |   |   |   |   |   |   |
|-----------|----------|----------|----------|----------|----------|---|---|----|----|---|---|---|---|---|---|
| 6430531B1 | -3.51064 | -0.79733 | 4.371921 | 0.036536 | 1        | 3 | 0 | 0  | 2  | 2 | 0 | 0 | 0 | 0 | 0 |
| Zfl2      | -3.50938 | 0.581703 | 6.327456 | 0.011888 | 0.9915   | 4 | 0 | 2  | 0  | 1 | 0 | 0 | 0 | 0 | 0 |
| LOC102631 | -3.48628 | -0.49572 | 6.60392  | 0.010175 | 0.943727 | 1 | 1 | 3  | 0  | 2 | 0 | 0 | 0 | 0 | 0 |
| LOC108161 | -3.4758  | -0.76073 | 3.984896 | 0.04591  | 1        | 0 | 0 | 4  | 3  | 1 | 0 | 0 | 0 | 0 | 0 |
| LOC105241 | -3.47457 | -0.83226 | 5.112803 | 0.02375  | 1        | 3 | 0 | 3  | 0  | 1 | 0 | 0 | 0 | 0 | 0 |
| Ano9      | -3.46623 | 3.633014 | 8.389291 | 0.003774 | 0.610501 | 3 | 0 | 4  | 0  | 0 | 0 | 0 | 0 | 0 | 0 |
| Smc2os    | -3.46228 | -0.41325 | 5.676817 | 0.017191 | 1        | 8 | 4 | 5  | 2  | 0 | 0 | 0 | 1 | 0 | 0 |
| Pcdhga4   | -3.45982 | -0.16104 | 4.575546 | 0.032431 | 1        | 0 | 3 | 0  | 0  | 3 | 0 | 0 | 0 | 0 | 0 |
| Cldn3     | -3.44651 | 3.5994   | 8.230633 | 0.004119 | 0.644276 | 0 | 0 | 7  | 0  | 0 | 0 | 0 | 0 | 0 | 0 |
| Hnf1b     | -3.44649 | -0.79775 | 4.293698 | 0.038254 | 1        | 0 | 1 | 4  | 0  | 2 | 0 | 0 | 0 | 0 | 0 |
| Gm41307   | -3.42645 | -0.59297 | 5.281092 | 0.021558 | 1        | 0 | 0 | 3  | 1  | 3 | 0 | 0 | 0 | 0 | 0 |
| Gm30150   | -3.42406 | -0.83345 | 4.148724 | 0.041666 | 1        | 0 | 2 | 5  | 0  | 0 | 0 | 0 | 0 | 0 | 0 |
| Gm38973   | -3.41855 | -0.15591 | 6.829942 | 0.008964 | 0.918794 | 7 | 0 | 10 | 2  | 1 | 0 | 0 | 0 | 1 | 0 |
| Gm41233   | -3.41367 | -0.75609 | 4.683186 | 0.030459 | 1        | 2 | 1 | 0  | 0  | 3 | 0 | 0 | 0 | 0 | 0 |
| Gm31125   | -3.40395 | -0.67477 | 4.289173 | 0.038356 | 1        | 0 | 2 | 0  | 5  | 0 | 0 | 0 | 0 | 0 | 0 |
| Gm16222   | -3.39938 | -0.53728 | 7.142653 | 0.007527 | 0.846242 | 1 | 1 | 4  | 10 | 5 | 0 | 0 | 0 | 0 | 1 |
| LOC102631 | -3.38416 | -0.43977 | 5.8133   | 0.015905 | 1        | 0 | 0 | 0  | 5  | 2 | 0 | 0 | 0 | 0 | 0 |
| Gm39155   | -3.38337 | -0.11409 | 4.855254 | 0.027562 | 1        | 0 | 0 | 0  | 0  | 6 | 0 | 0 | 0 | 0 | 0 |
| 4930563FC | -3.37987 | 0.999332 | 6.682562 | 0.009736 | 0.941571 | 1 | 0 | 0  | 6  | 0 | 0 | 0 | 0 | 0 | 0 |
| Gm35476   | -3.37503 | -0.44286 | 4.425508 | 0.035406 | 1        | 4 | 1 | 1  | 0  | 0 | 0 | 0 | 0 | 0 | 0 |
| Tmem255t  | -3.36993 | -0.45934 | 4.409988 | 0.035729 | 1        | 1 | 3 | 2  | 0  | 0 | 0 | 0 | 0 | 0 | 0 |
| Gm42127   | -3.36273 | 1.371855 | 11.83317 | 0.000582 | 0.322039 | 8 | 0 | 5  | 0  | 5 | 0 | 0 | 0 | 1 | 0 |
| 1700026J1 | -3.35208 | -0.76043 | 3.90752  | 0.04807  | 1        | 0 | 0 | 0  | 5  | 2 | 0 | 0 | 0 | 0 | 0 |
| Gm41909   | -3.32946 | -0.05791 | 5.797778 | 0.016046 | 1        | 0 | 0 | 5  | 2  | 0 | 0 | 0 | 0 | 0 | 0 |
| Gm39939   | -3.32816 | -0.52889 | 5.105376 | 0.023852 | 1        | 8 | 2 | 4  | 5  | 0 | 0 | 0 | 0 | 0 | 1 |
| Gm32576   | -3.30912 | -0.73992 | 4.865827 | 0.027394 | 1        | 1 | 1 | 0  | 2  | 2 | 0 | 0 | 0 | 0 | 0 |
| Hist1h2an | -3.30626 | 0.617779 | 4.924547 | 0.026478 | 1        | 0 | 0 | 7  | 0  | 0 | 0 | 0 | 0 | 0 | 0 |
| Gm13251   | -3.30514 | 0.685959 | 11.70132 | 0.000625 | 0.340441 | 1 | 5 | 2  | 1  | 8 | 0 | 0 | 0 | 0 | 1 |
| LOC102631 | -3.30143 | -0.33667 | 4.853019 | 0.027598 | 1        | 4 | 0 | 2  | 0  | 0 | 0 | 0 | 0 | 0 | 0 |
| Gm5566    | -3.29543 | -0.57395 | 4.390011 | 0.03615  | 1        | 0 | 0 | 2  | 0  | 4 | 0 | 0 | 0 | 0 | 0 |
| 1700001J0 | -3.29103 | -0.44282 | 3.918693 | 0.047752 | 1        | 0 | 5 | 0  | 0  | 0 | 0 | 0 | 0 | 0 | 0 |
| Ccdc63    | -3.29017 | -0.48796 | 4.748825 | 0.029318 | 1        | 8 | 1 | 2  | 4  | 2 | 0 | 0 | 0 | 1 | 0 |
| Als2cr11b | -3.28965 | -0.57324 | 5.558366 | 0.018393 | 1        | 4 | 0 | 0  | 2  | 0 | 0 | 0 | 0 | 0 | 0 |
| LOC108161 | -3.28291 | 0.567928 | 6.545109 | 0.010517 | 0.954012 | 0 | 0 | 2  | 0  | 4 | 0 | 0 | 0 | 0 | 0 |
| LOC108161 | -3.28222 | -0.49168 | 4.056268 | 0.044008 | 1        | 0 | 0 | 7  | 0  | 0 | 0 | 0 | 0 | 0 | 0 |
| Gm41406   | -3.2804  | -0.16888 | 4.914789 | 0.026628 | 1        | 0 | 0 | 0  | 7  | 0 | 0 | 0 | 0 | 0 | 0 |
| C030004G  | -3.27905 | -0.83504 | 4.253745 | 0.039164 | 1        | 0 | 0 | 5  | 2  | 0 | 0 | 0 | 0 | 0 | 0 |
| Gm35679   | -3.25117 | -0.50067 | 5.265551 | 0.021752 | 1        | 0 | 2 | 4  | 0  | 0 | 0 | 0 | 0 | 0 | 0 |
| Lpar2     | -3.2464  | 2.84672  | 7.090173 | 0.007751 | 0.854323 | 0 | 0 | 3  | 3  | 0 | 0 | 0 | 0 | 0 | 0 |
| Gm40118   | -3.23875 | -0.85205 | 4.297388 | 0.038171 | 1        | 2 | 0 | 0  | 3  | 1 | 0 | 0 | 0 | 0 | 0 |
| Spag17    | -3.21412 | -0.57414 | 5.14867  | 0.023264 | 1        | 0 | 0 | 4  | 0  | 2 | 0 | 0 | 0 | 0 | 0 |
| Zfp92     | -3.21058 | 0.630461 | 5.782971 | 0.016182 | 1        | 0 | 1 | 5  | 0  | 0 | 0 | 0 | 0 | 0 | 0 |
| LOC108161 | -3.20619 | 0.458784 | 9.740975 | 0.001802 | 0.444309 | 2 | 9 | 5  | 12 | 9 | 0 | 1 | 0 | 2 | 0 |
| Sell      | -3.20017 | -0.63772 | 5.024407 | 0.024992 | 1        | 2 | 0 | 0  | 4  | 0 | 0 | 0 | 0 | 0 | 0 |
| Ly6d      | -3.19966 | 0.137676 | 4.99816  | 0.025374 | 1        | 2 | 0 | 0  | 4  | 0 | 0 | 0 | 0 | 0 | 0 |
| Gm32057   | -3.198   | -0.00317 | 5.47073  | 0.019338 | 1        | 0 | 0 | 1  | 12 | 5 | 0 | 0 | 1 | 0 | 0 |
| Ngf       | -3.18842 | -0.2821  | 4.930782 | 0.026382 | 1        | 0 | 3 | 0  | 0  | 2 | 0 | 0 | 0 | 0 | 0 |
| Gm35470   | -3.18644 | -0.75665 | 4.498322 | 0.033928 | 1        | 0 | 2 | 0  | 0  | 3 | 0 | 0 | 0 | 0 | 0 |
| LOC108161 | -3.17911 | -0.83373 | 3.88329  | 0.048769 | 1        | 1 | 0 | 0  | 4  | 1 | 0 | 0 | 0 | 0 | 0 |
| Gm29681   | -3.16403 | -0.77899 | 4.934717 | 0.026322 | 1        | 0 | 0 | 3  | 2  | 1 | 0 | 0 | 0 | 0 | 0 |
| Gm29771   | -3.16233 | -0.84997 | 4.436992 | 0.035168 | 1        | 0 | 3 | 1  | 0  | 1 | 0 | 0 | 0 | 0 | 0 |
| Gm36235   | -3.15478 | -0.79644 | 4.24499  | 0.039366 | 1        | 0 | 1 | 0  | 5  | 0 | 0 | 0 | 0 | 0 | 0 |
| LOC102631 | -3.15407 | -0.70503 | 3.866017 | 0.049273 | 1        | 1 | 0 | 0  | 0  | 4 | 0 | 0 | 0 | 0 | 0 |
| Gm11532   | -3.15051 | 0.559286 | 5.453606 | 0.019528 | 1        | 2 | 3 | 0  | 0  | 0 | 0 | 0 | 0 | 0 | 0 |
| Bpifb9a   | -3.13827 | -0.49793 | 4.676164 | 0.030584 | 1        | 3 | 0 | 0  | 0  | 2 | 0 | 0 | 0 | 0 | 0 |
| Gm39530   | -3.13761 | 0.010486 | 5.69193  | 0.017043 | 1        | 2 | 0 | 13 | 0  | 2 | 0 | 0 | 0 | 1 | 0 |
| A930001C  | -3.13726 | 0.144395 | 5.077443 | 0.024239 | 1        | 0 | 1 | 0  | 0  | 4 | 0 | 0 | 0 | 0 | 0 |
| Gm30788   | -3.12803 | -0.27741 | 4.811301 | 0.028274 | 1        | 0 | 0 | 0  | 0  | 5 | 0 | 0 | 0 | 0 | 0 |
| Platr22   | -3.11219 | -0.30721 | 4.573485 | 0.03247  | 1        | 0 | 0 | 4  | 2  | 0 | 0 | 0 | 0 | 0 | 0 |
| Gm42312   | -3.10643 | -0.50792 | 4.201201 | 0.040395 | 1        | 0 | 0 | 6  | 0  | 0 | 0 | 0 | 0 | 0 | 0 |
| Gm16596   | -3.10137 | -0.68898 | 4.052393 | 0.044109 | 1        | 0 | 0 | 6  | 0  | 0 | 0 | 0 | 0 | 0 | 0 |
| Glis3     | -3.10072 | 1.044378 | 12.69036 | 0.000368 | 0.274974 | 3 | 2 | 5  | 9  | 7 | 0 | 1 | 0 | 0 | 1 |
| S100z     | -3.09783 | -0.09531 | 4.596954 | 0.032029 | 1        | 0 | 3 | 0  | 2  | 0 | 0 | 0 | 0 | 0 | 0 |
| Gm34850   | -3.09726 | -0.55314 | 4.91164  | 0.026676 | 1        | 0 | 3 | 2  | 0  | 0 | 0 | 0 | 0 | 0 | 0 |
| Gm34168   | -3.09363 | -0.70575 | 4.16592  | 0.041245 | 1        | 0 | 0 | 1  | 0  | 4 | 0 | 0 | 0 | 0 | 0 |
| Gm36167   | -3.08709 | -0.38939 | 4.347352 | 0.037067 | 1        | 0 | 0 | 0  | 6  | 0 | 0 | 0 | 0 | 0 | 0 |
| Gm28535   | -3.06744 | -0.67055 | 4.171521 | 0.041109 | 1        | 0 | 1 | 2  | 0  | 2 | 0 | 0 | 0 | 0 | 0 |
| Gm39103   | -3.04812 | -0.79425 | 4.606648 | 0.031848 | 1        | 3 | 0 | 2  | 0  | 0 | 0 | 0 | 0 | 0 | 0 |

|           |          |          |          |          |          |    |    |    |    |    |   |   |   |   |   |
|-----------|----------|----------|----------|----------|----------|----|----|----|----|----|---|---|---|---|---|
| Fxyd4     | -3.04733 | 2.914059 | 6.070753 | 0.013744 | 1        | 0  | 0  | 0  | 0  | 5  | 0 | 0 | 0 | 0 | 0 |
| 2010107G: | -3.04364 | 3.340222 | 6.107163 | 0.013464 | 1        | 5  | 0  | 0  | 0  | 0  | 0 | 0 | 0 | 0 | 0 |
| Slc39a4   | -3.03767 | 5.019181 | 6.08165  | 0.013659 | 1        | 0  | 1  | 2  | 0  | 2  | 0 | 0 | 0 | 0 | 0 |
| Capns2    | -3.03682 | 4.264512 | 6.029105 | 0.014072 | 1        | 0  | 0  | 2  | 0  | 3  | 0 | 0 | 0 | 0 | 0 |
| LOC10263: | -3.02873 | -0.22619 | 9.8846   | 0.001667 | 0.430212 | 4  | 5  | 5  | 1  | 8  | 0 | 1 | 0 | 0 | 1 |
| Zscan25   | -3.02852 | 0.488239 | 6.786988 | 0.009182 | 0.924097 | 12 | 1  | 5  | 0  | 6  | 0 | 0 | 0 | 0 | 2 |
| Tert      | -3.0204  | 1.517046 | 9.323223 | 0.002263 | 0.502051 | 9  | 0  | 3  | 0  | 2  | 0 | 0 | 0 | 1 | 0 |
| Gm35899   | -3.01442 | -0.14732 | 11.83911 | 0.00058  | 0.322039 | 4  | 2  | 14 | 5  | 10 | 1 | 0 | 0 | 0 | 2 |
| Tcap      | -3.01442 | -0.14316 | 5.36232  | 0.020576 |          | 1  | 6  | 2  | 4  | 18 | 5 | 3 | 0 | 0 | 0 |
| Gm32798   | -3.00654 | -0.89008 | 4.271745 | 0.038751 |          | 1  | 1  | 1  | 0  | 3  | 0 | 0 | 0 | 0 | 0 |
| Gpr141    | -3.00239 | -0.24079 | 7.363032 | 0.006658 | 0.791677 | 0  | 4  | 4  | 9  | 7  | 0 | 0 | 2 | 0 | 0 |
| Gm34232   | -2.99896 | 0.29708  | 4.61975  | 0.031606 |          | 1  | 0  | 4  | 0  | 11 | 0 | 0 | 0 | 1 | 0 |
| Snord47   | -2.99723 | -0.3643  | 4.823602 | 0.028073 |          | 1  | 2  | 0  | 0  | 3  | 0 | 0 | 0 | 0 | 0 |
| Gm21057   | -2.9911  | -0.77965 | 3.921709 | 0.047666 |          | 1  | 0  | 0  | 3  | 0  | 2 | 0 | 0 | 0 | 0 |
| Nipal4    | -2.9876  | 0.044837 | 8.496184 | 0.003559 | 0.603942 | 6  | 0  | 7  | 18 | 5  | 1 | 0 | 0 | 1 | 1 |
| Fam124b   | -2.98411 | -0.63848 | 4.237829 | 0.039533 |          | 1  | 1  | 0  | 0  | 3  | 1 | 0 | 0 | 0 | 0 |
| Exo1      | -2.98195 | 0.880759 | 5.529809 | 0.018695 |          | 1  | 0  | 0  | 2  | 3  | 0 | 0 | 0 | 0 | 0 |
| Gm40055   | -2.9751  | -0.62615 | 6.774463 | 0.009247 | 0.924097 | 0  | 2  | 4  | 3  | 5  | 0 | 0 | 0 | 1 | 0 |
| Gm26524   | -2.97407 | -0.46751 | 4.349744 | 0.037015 |          | 1  | 0  | 1  | 4  | 0  | 0 | 0 | 0 | 0 | 0 |
| 5430437J1 | -2.96551 | -0.89078 | 4.812873 | 0.028248 |          | 1  | 1  | 0  | 2  | 2  | 0 | 0 | 0 | 0 | 0 |
| Atp7b     | -2.94905 | -0.3129  | 4.226955 | 0.039787 |          | 1  | 3  | 4  | 2  | 0  | 4 | 0 | 0 | 0 | 1 |
| A330032B: | -2.94433 | 0.084309 | 4.297262 | 0.038174 |          | 1  | 0  | 0  | 2  | 2  | 1 | 0 | 0 | 0 | 0 |
| 8430419K: | -2.94282 | 0.868306 | 6.724264 | 0.009511 | 0.931074 | 0  | 0  | 7  | 6  | 2  | 1 | 0 | 0 | 0 | 0 |
| Galr2     | -2.9414  | 0.05459  | 5.212471 | 0.022425 |          | 1  | 2  | 8  | 0  | 2  | 0 | 0 | 0 | 1 | 0 |
| Dpcr1     | -2.93018 | -0.08147 | 4.169015 | 0.04117  |          | 1  | 0  | 4  | 0  | 0  | 0 | 0 | 0 | 0 | 0 |
| 1810062G: | -2.90922 | -0.25911 | 6.107535 | 0.013461 |          | 1  | 0  | 1  | 6  | 14 | 4 | 0 | 1 | 0 | 1 |
| Gm40826   | -2.9087  | 0.640064 | 10.9203  | 0.000951 | 0.380847 | 5  | 8  | 6  | 16 | 5  | 4 | 0 | 0 | 0 | 0 |
| 1700010LC | -2.90617 | -0.48821 | 5.156352 | 0.023161 |          | 1  | 2  | 3  | 6  | 0  | 2 | 1 | 0 | 0 | 0 |
| Cbln4     | -2.88702 | -0.8492  | 4.09246  | 0.043075 |          | 1  | 1  | 2  | 0  | 0  | 1 | 0 | 0 | 0 | 0 |
| Gm17224   | -2.87131 | 0.061235 | 5.32436  | 0.021029 |          | 1  | 2  | 3  | 1  | 6  | 1 | 0 | 0 | 1 | 0 |
| Gm15723   | -2.86548 | -0.37125 | 6.038799 | 0.013995 |          | 1  | 2  | 0  | 4  | 7  | 1 | 0 | 0 | 1 | 0 |
| D730001G  | -2.86012 | 0.347072 | 4.60822  | 0.031819 |          | 1  | 0  | 4  | 0  | 0  | 0 | 0 | 0 | 0 | 0 |
| Tnip3     | -2.85505 | 0.052166 | 3.889778 | 0.048581 |          | 1  | 4  | 0  | 0  | 0  | 0 | 0 | 0 | 0 | 0 |
| 4930444A: | -2.83522 | -0.67199 | 4.183135 | 0.040828 |          | 1  | 2  | 0  | 0  | 0  | 2 | 0 | 0 | 0 | 0 |
| 4930512B: | -2.83477 | 0.442384 | 4.220134 | 0.039947 |          | 1  | 3  | 0  | 0  | 0  | 1 | 0 | 0 | 0 | 0 |
| Ccdc7a    | -2.81847 | 0.322114 | 4.456884 | 0.034761 |          | 1  | 4  | 0  | 0  | 0  | 0 | 0 | 0 | 0 | 0 |
| Gm39334   | -2.81318 | -0.29567 | 4.645002 | 0.031144 |          | 1  | 0  | 2  | 1  | 1  | 8 | 0 | 0 | 0 | 1 |
| Mir6398   | -2.81199 | 1.03892  | 7.400333 | 0.006521 | 0.78202  | 8  | 1  | 3  | 0  | 0  | 0 | 0 | 0 | 1 | 0 |
| Gm33997   | -2.80807 | 0.368135 | 4.722882 | 0.029764 |          | 1  | 2  | 2  | 0  | 0  | 0 | 0 | 0 | 0 | 0 |
| Ntn4      | -2.80676 | 0.773834 | 4.669187 | 0.030708 |          | 1  | 3  | 1  | 0  | 0  | 0 | 0 | 0 | 0 | 0 |
| Gm35551   | -2.79891 | 1.360379 | 4.828494 | 0.027993 |          | 1  | 0  | 4  | 0  | 0  | 0 | 0 | 0 | 0 | 0 |
| Crb2      | -2.79378 | 2.185433 | 4.842725 | 0.027763 |          | 1  | 0  | 4  | 0  | 0  | 0 | 0 | 0 | 0 | 0 |
| Gm7173    | -2.79163 | -0.16016 | 4.008747 | 0.045265 |          | 1  | 3  | 0  | 0  | 1  | 0 | 0 | 0 | 0 | 0 |
| Gm34656   | -2.78956 | 2.007532 | 4.697593 | 0.030205 |          | 1  | 0  | 0  | 0  | 0  | 4 | 0 | 0 | 0 | 0 |
| Acap1     | -2.78806 | -0.38546 | 4.195986 | 0.04052  |          | 1  | 1  | 0  | 1  | 0  | 2 | 0 | 0 | 0 | 0 |
| Tnf       | -2.78306 | 1.982892 | 4.751916 | 0.029266 |          | 1  | 0  | 0  | 0  | 0  | 4 | 0 | 0 | 0 | 0 |
| A830092H: | -2.77555 | -0.14263 | 10.22411 | 0.001386 | 0.406676 | 7  | 9  | 2  | 9  | 7  | 0 | 1 | 0 | 3 | 0 |
| Ost4      | -2.76518 | 0.043592 | 5.239282 | 0.022082 |          | 1  | 0  | 0  | 4  | 6  | 3 | 0 | 0 | 1 | 0 |
| Ap1m2     | -2.7603  | 5.179818 | 4.919292 | 0.026558 |          | 1  | 2  | 2  | 0  | 0  | 0 | 0 | 0 | 0 | 0 |
| Sapcd2    | -2.75818 | 1.316722 | 6.950162 | 0.008381 | 0.889442 | 0  | 5  | 0  | 0  | 6  | 0 | 0 | 0 | 1 | 0 |
| Lamb3     | -2.75734 | 4.229762 | 4.88093  | 0.027155 |          | 1  | 0  | 1  | 2  | 0  | 1 | 0 | 0 | 0 | 0 |
| Lvrn      | -2.74691 | 0.903069 | 4.33884  | 0.037252 |          | 1  | 0  | 0  | 1  | 1  | 2 | 0 | 0 | 0 | 0 |
| Cyp2u1    | -2.74002 | -0.08276 | 7.621831 | 0.005767 | 0.735366 | 6  | 0  | 7  | 2  | 5  | 1 | 0 | 0 | 0 | 1 |
| Smim17    | -2.73101 | -0.17029 | 8.071009 | 0.004498 | 0.677057 | 3  | 0  | 13 | 7  | 7  | 0 | 0 | 0 | 1 | 2 |
| Gm38851   | -2.7262  | 2.030239 | 7.323302 | 0.006807 | 0.797639 | 0  | 4  | 0  | 0  | 7  | 0 | 0 | 1 | 0 | 0 |
| 4930579H: | -2.72565 | -0.26614 | 3.952503 | 0.046802 |          | 1  | 10 | 4  | 0  | 9  | 9 | 0 | 2 | 0 | 2 |
| Gm39299   | -2.72531 | 1.102693 | 6.886884 | 0.008683 | 0.908085 | 4  | 3  | 0  | 0  | 4  | 0 | 0 | 0 | 0 | 1 |
| Kif27     | -2.72254 | -0.06708 | 7.700458 | 0.005521 | 0.725022 | 5  | 1  | 6  | 12 | 12 | 0 | 0 | 0 | 3 | 1 |
| Psg17     | -2.71864 | 0.111366 | 4.247086 | 0.039318 |          | 1  | 0  | 0  | 3  | 0  | 1 | 0 | 0 | 0 | 0 |
| Pigr      | -2.71133 | 1.887215 | 4.526044 | 0.033383 |          | 1  | 0  | 0  | 4  | 0  | 0 | 0 | 0 | 0 | 0 |
| Gm15753   | -2.70601 | 0.078622 | 4.156647 | 0.041471 |          | 1  | 1  | 0  | 0  | 3  | 0 | 0 | 0 | 0 | 0 |
| Gm31728   | -2.69491 | -0.07454 | 6.382734 | 0.011524 | 0.987077 | 1  | 9  | 6  | 5  | 5  | 1 | 0 | 0 | 1 | 1 |
| LOC10816: | -2.67935 | 0.006465 | 4.202134 | 0.040373 |          | 1  | 0  | 0  | 0  | 4  | 0 | 0 | 0 | 0 | 0 |
| Gm9861    | -2.65564 | 0.232017 | 3.936794 | 0.047241 |          | 1  | 0  | 0  | 0  | 4  | 0 | 0 | 0 | 0 | 0 |
| LOC10816: | -2.61321 | -0.09169 | 4.156107 | 0.041485 |          | 1  | 0  | 0  | 3  | 22 | 3 | 0 | 3 | 0 | 0 |
| Mybl2     | -2.61245 | 1.300121 | 6.275786 | 0.01224  | 0.9915   | 4  | 1  | 0  | 6  | 0  | 0 | 0 | 0 | 0 | 1 |
| LOC10816: | -2.60126 | 0.498688 | 7.030636 | 0.008013 | 0.858587 | 9  | 3  | 0  | 0  | 4  | 0 | 1 | 1 | 0 | 0 |
| Btbd16    | -2.56199 | -0.22862 | 7.197949 | 0.007299 | 0.826025 | 1  | 7  | 3  | 10 | 3  | 0 | 1 | 2 | 0 | 0 |

|           |          |          |          |          |          |    |    |    |    |    |    |   |    |   |    |
|-----------|----------|----------|----------|----------|----------|----|----|----|----|----|----|---|----|---|----|
| Il15      | -2.553   | 1.067525 | 10.27293 | 0.00135  | 0.406676 | 4  | 9  | 6  | 2  | 2  | 0  | 0 | 1  | 2 | 0  |
| Gm35051   | -2.52188 | -0.27816 | 5.350609 | 0.020715 |          | 1  | 0  | 0  | 5  | 8  | 5  | 0 | 0  | 1 | 0  |
| Gm30339   | -2.50323 | -0.1851  | 6.055363 | 0.013864 |          | 1  | 3  | 0  | 6  | 7  | 2  | 0 | 0  | 1 | 0  |
| Gm39463   | -2.49734 | -0.29109 | 4.279471 | 0.038575 |          | 1  | 0  | 12 | 14 | 0  | 2  | 0 | 1  | 1 | 0  |
| Gm38484   | -2.48132 | -0.72508 | 4.345405 | 0.037109 |          | 1  | 0  | 1  | 1  | 5  | 3  | 0 | 0  | 0 | 0  |
| Gm39497   | -2.46825 | -0.1503  | 3.984709 | 0.045915 |          | 1  | 0  | 2  | 0  | 3  | 10 | 0 | 0  | 0 | 0  |
| Slc5a1    | -2.46141 | 6.350938 | 9.949871 | 0.001609 | 0.427077 | 5  | 1  | 0  | 5  | 5  | 0  | 0 | 0  | 0 | 0  |
| Gm35585   | -2.45893 | 0.234085 | 3.98935  | 0.045789 |          | 1  | 1  | 2  | 2  | 0  | 4  | 1 | 0  | 0 | 0  |
| B830017Hl | -2.43864 | -0.0851  | 6.712162 | 0.009576 | 0.931074 | 5  | 13 | 4  | 6  | 4  | 0  | 1 | 3  | 1 | 0  |
| A430110Lz | -2.42593 | 1.081789 | 8.84695  | 0.002936 | 0.561798 | 3  | 4  | 8  | 3  | 4  | 1  | 1 | 0  | 0 | 1  |
| Krt9      | -2.38885 | -0.2997  | 4.620967 | 0.031583 |          | 1  | 3  | 7  | 7  | 0  | 3  | 0 | 0  | 2 | 1  |
| Efcab6    | -2.3886  | 4.528462 | 23.6673  | 1.15E-06 | 0.041197 | 9  | 4  | 9  | 12 | 12 | 5  | 0 | 0  | 0 | 2  |
| LOC10816f | -2.37735 | 1.496341 | 5.730682 | 0.016671 |          | 1  | 2  | 0  | 4  | 0  | 3  | 0 | 0  | 0 | 1  |
| Spata18   | -2.37168 | -0.42149 | 4.009189 | 0.045253 |          | 1  | 4  | 4  | 0  | 4  | 3  | 0 | 0  | 0 | 2  |
| Llgl2     | -2.36731 | 5.034575 | 5.992139 | 0.01437  |          | 1  | 1  | 0  | 3  | 5  | 0  | 0 | 0  | 1 | 0  |
| Gm41293   | -2.36034 | 0.375627 | 4.966334 | 0.025845 |          | 1  | 3  | 0  | 0  | 5  | 1  | 0 | 1  | 0 | 0  |
| Akr1b7    | -2.35652 | 6.637722 | 5.845757 | 0.015615 |          | 1  | 0  | 0  | 2  | 7  | 0  | 0 | 0  | 0 | 1  |
| Egf       | -2.33889 | 0.826266 | 4.636638 | 0.031296 |          | 1  | 0  | 2  | 7  | 0  | 0  | 0 | 0  | 0 | 1  |
| Cd40      | -2.33106 | 0.328075 | 5.398986 | 0.020148 |          | 1  | 3  | 2  | 10 | 0  | 0  | 0 | 0  | 1 | 0  |
| Tmlhe     | -2.30351 | 0.321714 | 6.215414 | 0.012664 |          | 1  | 3  | 2  | 0  | 16 | 11 | 0 | 0  | 1 | 4  |
| 1700061G: | -2.29511 | -0.18249 | 4.927341 | 0.026435 |          | 1  | 0  | 7  | 10 | 4  | 4  | 0 | 3  | 0 | 1  |
| Azgp1     | -2.29397 | 0.121049 | 4.49365  | 0.034021 |          | 1  | 3  | 3  | 7  | 0  | 1  | 0 | 0  | 0 | 2  |
| Gm32311   | -2.28923 | 0.278742 | 6.05283  | 0.013884 |          | 1  | 1  | 2  | 11 | 3  | 4  | 2 | 0  | 0 | 1  |
| Slf10-ps  | -2.27002 | 2.327726 | 4.833985 | 0.027904 |          | 1  | 2  | 3  | 0  | 0  | 3  | 0 | 0  | 0 | 1  |
| Gm40142   | -2.21314 | 0.579779 | 6.549326 | 0.010492 | 0.954012 | 5  | 1  | 0  | 11 | 3  | 0  | 0 | 0  | 0 | 3  |
| Ccdc69    | -2.20612 | 1.060621 | 4.470145 | 0.034492 |          | 1  | 3  | 0  | 4  | 1  | 0  | 0 | 1  | 0 | 0  |
| Gm42244   | -2.20129 | 0.612909 | 4.583596 | 0.032279 |          | 1  | 3  | 0  | 12 | 3  | 2  | 0 | 0  | 1 | 2  |
| Hrc       | -2.19403 | 0.371369 | 4.809237 | 0.028308 |          | 1  | 7  | 1  | 0  | 4  | 1  | 0 | 1  | 0 | 0  |
| Gm8430    | -2.19337 | 0.976852 | 8.377647 | 0.003799 | 0.610501 | 15 | 3  | 4  | 8  | 5  | 0  | 1 | 0  | 1 | 4  |
| Gm34872   | -2.16918 | 1.413702 | 6.302685 | 0.012056 | 0.9915   | 3  | 3  | 7  | 4  | 12 | 0  | 0 | 3  | 0 | 2  |
| Murc      | -2.14821 | 1.476253 | 9.65808  | 0.001885 | 0.461375 | 4  | 3  | 14 | 3  | 11 | 1  | 0 | 0  | 0 | 5  |
| LOC10264f | -2.14312 | 0.167092 | 5.052843 | 0.024586 |          | 1  | 7  | 0  | 4  | 13 | 1  | 3 | 0  | 0 | 1  |
| Gpx2-ps1  | -2.11478 | -0.10381 | 4.809149 | 0.028309 |          | 1  | 2  | 5  | 2  | 17 | 3  | 2 | 2  | 0 | 1  |
| Gm30064   | -2.09625 | 2.510129 | 10.00757 | 0.001559 | 0.418551 | 15 | 0  | 4  | 5  | 3  | 1  | 1 | 0  | 2 | 1  |
| Gm39603   | -2.09022 | 0.605588 | 4.869881 | 0.027329 |          | 1  | 4  | 1  | 5  | 1  | 6  | 0 | 1  | 0 | 1  |
| Gm36283   | -2.08159 | 1.075031 | 5.441541 | 0.019663 |          | 1  | 9  | 6  | 1  | 0  | 0  | 1 | 0  | 0 | 2  |
| Gm41831   | -2.06443 | 1.928287 | 4.014484 | 0.045111 |          | 1  | 5  | 0  | 0  | 2  | 0  | 0 | 0  | 0 | 1  |
| Gm34079   | -2.06406 | 1.088274 | 6.150078 | 0.013141 |          | 1  | 1  | 1  | 13 | 8  | 1  | 0 | 1  | 2 | 0  |
| Cldn23    | -2.05185 | 5.5181   | 4.127157 | 0.0422   |          | 1  | 0  | 5  | 0  | 0  | 2  | 0 | 0  | 1 | 0  |
| Dhx58     | -2.02989 | 1.634751 | 6.085581 | 0.013629 |          | 1  | 11 | 0  | 18 | 10 | 0  | 3 | 1  | 1 | 0  |
| Hk1os     | -2.02814 | 0.444392 | 4.503377 | 0.033828 |          | 1  | 0  | 0  | 4  | 8  | 14 | 1 | 1  | 0 | 3  |
| Zbtb49    | -2.00275 | 1.174917 | 10.98168 | 0.00092  | 0.376182 | 11 | 11 | 11 | 9  | 1  | 1  | 6 | 1  | 1 | 0  |
| Gm30694   | -1.99924 | 0.809768 | 5.31259  | 0.021172 |          | 1  | 9  | 0  | 4  | 9  | 5  | 0 | 0  | 1 | 3  |
| Gbp8      | -1.99383 | 0.853443 | 5.803302 | 0.015996 |          | 1  | 12 | 2  | 0  | 3  | 7  | 0 | 2  | 0 | 1  |
| Lrp2      | -1.94738 | 0.156916 | 4.979567 | 0.025648 |          | 1  | 3  | 2  | 4  | 10 | 11 | 0 | 0  | 1 | 3  |
| LOC10263f | -1.93442 | 0.911137 | 5.202274 | 0.022557 |          | 1  | 3  | 0  | 11 | 3  | 4  | 3 | 0  | 0 | 1  |
| Akr1c14   | -1.9342  | -0.03413 | 4.116484 | 0.042467 |          | 1  | 6  | 1  | 8  | 10 | 5  | 1 | 0  | 5 | 0  |
| Prss22    | -1.93284 | 7.360883 | 5.24411  | 0.022021 |          | 1  | 1  | 0  | 0  | 8  | 2  | 0 | 0  | 0 | 2  |
| E130008Df | -1.90012 | 2.219985 | 6.0186   | 0.014156 |          | 1  | 3  | 3  | 0  | 7  | 2  | 1 | 0  | 1 | 0  |
| Gck       | -1.89829 | 0.306343 | 4.573732 | 0.032466 |          | 1  | 7  | 6  | 13 | 8  | 1  | 1 | 1  | 1 | 0  |
| Al661453  | -1.89737 | 9.20547  | 15.19362 | 9.70E-05 | 0.166227 | 4  | 1  | 12 | 11 | 9  | 0  | 3 | 0  | 4 | 1  |
| Nuf2      | -1.88225 | 1.894024 | 5.442937 | 0.019648 |          | 1  | 10 | 1  | 2  | 0  | 9  | 0 | 0  | 0 | 4  |
| Pyhin1    | -1.87607 | 3.796421 | 8.85725  | 0.002919 | 0.561798 | 1  | 3  | 8  | 7  | 9  | 0  | 3 | 0  | 1 | 2  |
| Gtpbp10   | -1.87434 | 0.657135 | 5.364004 | 0.020557 |          | 1  | 5  | 2  | 4  | 14 | 4  | 0 | 1  | 4 | 0  |
| Lyz2      | -1.86549 | 1.165715 | 13.24765 | 0.000273 | 0.265369 | 9  | 12 | 33 | 39 | 22 | 3  | 3 | 4  | 9 | 6  |
| Adrb3     | -1.83654 | 1.489573 | 4.479508 | 0.034304 |          | 1  | 0  | 1  | 0  | 20 | 0  | 0 | 0  | 0 | 3  |
| Acta1     | -1.82587 | 0.826475 | 5.911847 | 0.015039 |          | 1  | 15 | 30 | 12 | 24 | 4  | 1 | 3  | 2 | 12 |
| Stag3     | -1.82373 | 2.05986  | 5.058453 | 0.024506 |          | 1  | 3  | 2  | 3  | 2  | 4  | 0 | 0  | 0 | 3  |
| Ltb4r1    | -1.81214 | 3.36368  | 4.30019  | 0.038108 |          | 1  | 0  | 0  | 4  | 1  | 5  | 0 | 0  | 0 | 2  |
| Crhbp     | -1.8024  | 1.012967 | 5.783148 | 0.016181 |          | 1  | 8  | 3  | 6  | 14 | 16 | 2 | 4  | 1 | 3  |
| Slc2a5    | -1.79486 | 0.543065 | 4.318221 | 0.037706 |          | 1  | 28 | 3  | 11 | 22 | 15 | 3 | 14 | 0 | 2  |
| Gm17059   | -1.77146 | 1.385467 | 5.705418 | 0.016913 |          | 1  | 8  | 0  | 4  | 4  | 2  | 0 | 0  | 0 | 1  |
| LOC10816f | -1.76946 | 0.960611 | 4.037996 | 0.044487 |          | 1  | 1  | 1  | 1  | 9  | 6  | 0 | 0  | 0 | 4  |
| Gramd2    | -1.76385 | 1.577619 | 6.256761 | 0.012372 | 0.9915   | 2  | 7  | 8  | 3  | 5  | 0  | 3 | 1  | 1 | 1  |
| 5430416Of | -1.75936 | 0.094957 | 4.778219 | 0.028822 |          | 1  | 8  | 8  | 5  | 11 | 2  | 4 | 0  | 1 | 0  |
| 6330407Af | -1.75761 | 2.004543 | 7.597464 | 0.005845 | 0.735366 | 0  | 14 | 8  | 5  | 5  | 0  | 1 | 4  | 3 | 0  |
| Gm16230   | -1.74556 | 0.64547  | 4.156619 | 0.041472 |          | 1  | 2  | 4  | 0  | 13 | 0  | 0 | 0  | 0 | 4  |
| Sp110     | -1.74551 | 0.685936 | 5.519567 | 0.018805 |          | 1  | 8  | 4  | 5  | 16 | 6  | 1 | 1  | 1 | 2  |

|            |          |          |          |          |          |    |    |    |    |    |    |    |    |    |    |
|------------|----------|----------|----------|----------|----------|----|----|----|----|----|----|----|----|----|----|
| Gm34342    | -1.73894 | -0.51366 | 4.016771 | 0.04505  | 1        | 2  | 5  | 3  | 5  | 2  | 0  | 0  | 3  | 1  | 0  |
| Grap2      | -1.71752 | 0.892091 | 4.201892 | 0.040379 | 1        | 0  | 2  | 0  | 15 | 1  | 0  | 3  | 0  | 1  | 0  |
| Vsig10l    | -1.68377 | 4.419813 | 16.13582 | 5.90E-05 | 0.152284 | 17 | 10 | 22 | 11 | 13 | 9  | 1  | 0  | 5  | 4  |
| Gm30164    | -1.65643 | 1.605166 | 4.635979 | 0.031308 | 1        | 5  | 0  | 4  | 0  | 7  | 0  | 0  | 2  | 1  | 1  |
| Slc2a12    | -1.6537  | 1.3173   | 6.271405 | 0.01227  | 0.9915   | 9  | 2  | 2  | 14 | 1  | 0  | 3  | 0  | 2  | 2  |
| Gm42245    | -1.64925 | 0.843785 | 4.025434 | 0.044819 | 1        | 8  | 1  | 9  | 0  | 5  | 4  | 0  | 0  | 2  | 0  |
| Gm12174    | -1.61714 | 1.050667 | 5.587704 | 0.018087 | 1        | 1  | 0  | 6  | 10 | 7  | 2  | 0  | 1  | 2  | 1  |
| Gm34538    | -1.61312 | 0.633975 | 5.576287 | 0.018205 | 1        | 2  | 5  | 12 | 12 | 14 | 1  | 2  | 5  | 3  | 1  |
| Gm4890     | -1.60563 | 0.926525 | 5.433574 | 0.019753 | 1        | 2  | 5  | 2  | 11 | 3  | 2  | 3  | 0  | 0  | 1  |
| Fcrlb      | -1.60242 | 0.071912 | 3.960345 | 0.046584 | 1        | 7  | 8  | 15 | 5  | 5  | 0  | 3  | 5  | 2  | 1  |
| Serpnb5    | -1.5974  | 7.299767 | 4.325265 | 0.037551 | 1        | 3  | 1  | 3  | 0  | 5  | 3  | 0  | 0  | 0  | 0  |
| Gm32497    | -1.59294 | 1.726494 | 6.192928 | 0.012826 | 1        | 11 | 7  | 5  | 7  | 15 | 0  | 7  | 2  | 1  | 3  |
| D830035V   | -1.57158 | 0.729253 | 4.772475 | 0.028918 | 1        | 5  | 11 | 15 | 11 | 4  | 4  | 4  | 3  | 2  | 0  |
| Gm40181    | -1.57011 | 1.175769 | 4.295509 | 0.038213 | 1        | 6  | 2  | 3  | 11 | 11 | 3  | 0  | 0  | 4  | 2  |
| 9930014A:  | -1.55012 | 2.603883 | 8.980893 | 0.002728 | 0.552875 | 6  | 8  | 0  | 18 | 7  | 3  | 3  | 1  | 2  | 2  |
| Rps15a-psf | -1.54655 | 1.787419 | 6.061593 | 0.013815 | 1        | 5  | 1  | 3  | 12 | 5  | 3  | 0  | 0  | 2  | 2  |
| Guca1b     | -1.5337  | 1.801386 | 4.803985 | 0.028394 | 1        | 1  | 2  | 6  | 10 | 0  | 0  | 1  | 0  | 4  | 0  |
| Gm35566    | -1.51169 | 1.852335 | 6.665265 | 0.009831 | 0.943727 | 4  | 2  | 4  | 9  | 12 | 3  | 3  | 0  | 3  | 0  |
| Cdrt4      | -1.50957 | -0.35631 | 4.161075 | 0.041363 | 1        | 4  | 4  | 3  | 6  | 1  | 0  | 1  | 2  | 1  | 1  |
| Igslf6     | -1.49943 | 1.00146  | 5.593303 | 0.018029 | 1        | 16 | 8  | 6  | 18 | 14 | 4  | 0  | 2  | 5  | 7  |
| Peak1os    | -1.47581 | 0.916548 | 8.445343 | 0.00366  | 0.610501 | 10 | 7  | 7  | 12 | 13 | 4  | 2  | 7  | 2  | 0  |
| Glt28d2    | -1.47156 | 3.914446 | 6.713125 | 0.009571 | 0.931074 | 9  | 3  | 11 | 0  | 1  | 0  | 0  | 2  | 3  | 2  |
| Plac8      | -1.44992 | 6.686629 | 3.953397 | 0.046777 | 1        | 5  | 1  | 5  | 0  | 3  | 1  | 0  | 1  | 0  | 2  |
| 1700124L1  | -1.44471 | 0.070478 | 4.272817 | 0.038727 | 1        | 8  | 5  | 9  | 5  | 6  | 1  | 3  | 2  | 1  | 3  |
| Gm31504    | -1.434   | 1.726192 | 6.647528 | 0.009929 | 0.943727 | 4  | 5  | 14 | 26 | 3  | 4  | 4  | 3  | 2  | 2  |
| Gm11696    | -1.42478 | 0.885454 | 4.6597   | 0.030879 | 1        | 8  | 7  | 9  | 22 | 8  | 4  | 0  | 3  | 5  | 4  |
| Gdap10     | -1.42015 | 1.515614 | 6.535855 | 0.010572 | 0.954012 | 4  | 13 | 18 | 4  | 11 | 5  | 2  | 6  | 2  | 1  |
| Slc16a3    | -1.41523 | 2.383755 | 9.159411 | 0.002474 | 0.526744 | 13 | 14 | 23 | 9  | 13 | 1  | 3  | 7  | 9  | 3  |
| Chek2      | -1.41453 | 3.494383 | 8.434825 | 0.003681 | 0.610501 | 2  | 4  | 11 | 9  | 13 | 0  | 2  | 3  | 4  | 3  |
| Cd84       | -1.40927 | 0.396386 | 5.576558 | 0.018202 | 1        | 9  | 5  | 11 | 15 | 6  | 1  | 0  | 6  | 5  | 2  |
| Doc2g      | -1.3959  | 1.611337 | 5.709534 | 0.016873 | 1        | 6  | 3  | 8  | 12 | 5  | 0  | 0  | 1  | 1  | 8  |
| Zfp607     | -1.37906 | 1.988881 | 4.919482 | 0.026555 | 1        | 6  | 0  | 9  | 5  | 3  | 0  | 0  | 1  | 4  | 2  |
| Npas2      | -1.36683 | 2.257403 | 5.792428 | 0.016095 | 1        | 12 | 4  | 9  | 8  | 5  | 1  | 0  | 1  | 5  | 5  |
| Suv39h2    | -1.35277 | 1.30758  | 5.450828 | 0.019559 | 1        | 10 | 5  | 8  | 1  | 12 | 3  | 1  | 2  | 2  | 4  |
| Gm41581    | -1.32699 | 1.302428 | 4.699038 | 0.03018  | 1        | 15 | 5  | 16 | 1  | 8  | 0  | 6  | 2  | 1  | 6  |
| Sik1       | -1.31821 | 4.46327  | 15.3095  | 9.13E-05 | 0.164152 | 11 | 30 | 23 | 12 | 16 | 6  | 9  | 0  | 12 | 5  |
| Hmgn2      | -1.30337 | 2.612205 | 7.935514 | 0.004847 | 0.698042 | 1  | 7  | 24 | 11 | 11 | 2  | 5  | 5  | 6  | 0  |
| Akr1b3     | -1.30264 | 1.860663 | 4.504568 | 0.033804 | 1        | 4  | 5  | 1  | 6  | 23 | 6  | 0  | 2  | 5  | 1  |
| Poc1a      | -1.30064 | 1.723934 | 4.684302 | 0.030439 | 1        | 6  | 10 | 16 | 14 | 5  | 2  | 0  | 0  | 13 | 2  |
| LOC10816f  | -1.29754 | 1.93314  | 4.22388  | 0.039859 | 1        | 6  | 7  | 10 | 0  | 3  | 0  | 3  | 5  | 1  | 0  |
| Mpeg1      | -1.29235 | 1.534438 | 5.732055 | 0.016658 | 1        | 33 | 17 | 20 | 49 | 18 | 8  | 4  | 15 | 9  | 10 |
| Gm41526    | -1.27053 | 2.54414  | 4.636504 | 0.031299 | 1        | 7  | 6  | 5  | 15 | 29 | 2  | 0  | 4  | 4  | 11 |
| Qpct       | -1.26952 | 2.140713 | 6.657663 | 0.009873 | 0.943727 | 6  | 5  | 22 | 5  | 12 | 3  | 2  | 6  | 2  | 4  |
| Il1rl2     | -1.26822 | 3.421453 | 5.901621 | 0.015127 | 1        | 19 | 2  | 0  | 9  | 4  | 8  | 2  | 1  | 0  | 1  |
| 1700008J0  | -1.26537 | 1.879957 | 4.134606 | 0.042015 | 1        | 1  | 2  | 2  | 23 | 9  | 0  | 6  | 0  | 2  | 4  |
| Rgs14      | -1.26291 | 0.954875 | 8.390211 | 0.003772 | 0.610501 | 10 | 13 | 9  | 24 | 25 | 8  | 8  | 4  | 5  | 4  |
| Galns      | -1.2474  | 2.18942  | 7.62085  | 0.00577  | 0.735366 | 7  | 9  | 16 | 20 | 27 | 6  | 6  | 7  | 4  | 5  |
| Shroom4    | -1.24125 | 3.032747 | 9.779569 | 0.001765 | 0.443943 | 7  | 7  | 9  | 30 | 25 | 2  | 1  | 5  | 9  | 10 |
| Rab42      | -1.23843 | 2.027519 | 8.15078  | 0.004304 | 0.658937 | 11 | 12 | 22 | 20 | 10 | 0  | 5  | 9  | 4  | 8  |
| Frk        | -1.23837 | 5.449467 | 5.010815 | 0.025189 | 1        | 10 | 1  | 5  | 1  | 6  | 3  | 0  | 0  | 1  | 4  |
| Shq1       | -1.23828 | 1.814038 | 6.925856 | 0.008496 | 0.893702 | 18 | 2  | 12 | 16 | 15 | 3  | 3  | 6  | 3  | 7  |
| Crif1      | -1.23739 | 5.629386 | 15.66999 | 7.54E-05 | 0.159588 | 11 | 19 | 21 | 26 | 7  | 6  | 9  | 5  | 8  | 2  |
| LOC10524f  | -1.23242 | 0.430041 | 5.371239 | 0.020471 | 1        | 3  | 6  | 13 | 13 | 9  | 3  | 2  | 1  | 3  | 6  |
| LOC10816f  | -1.23215 | 1.760419 | 4.991847 | 0.025467 | 1        | 11 | 0  | 18 | 24 | 9  | 1  | 4  | 1  | 13 | 2  |
| Zkscan7    | -1.22189 | 1.974751 | 5.235317 | 0.022133 | 1        | 6  | 10 | 4  | 39 | 5  | 0  | 7  | 2  | 9  | 4  |
| Zfp114     | -1.21947 | 1.064192 | 4.591726 | 0.032127 | 1        | 12 | 14 | 9  | 6  | 4  | 4  | 2  | 2  | 7  | 2  |
| Spint2     | -1.21776 | 6.07095  | 4.102186 | 0.042828 | 1        | 2  | 3  | 7  | 3  | 5  | 0  | 3  | 1  | 2  | 1  |
| 4930451Gf  | -1.21649 | 1.134012 | 6.524978 | 0.010637 | 0.954012 | 18 | 16 | 17 | 14 | 16 | 8  | 3  | 6  | 7  | 6  |
| B230209E1  | -1.2145  | 0.884829 | 5.553161 | 0.018447 | 1        | 14 | 12 | 8  | 24 | 25 | 3  | 9  | 11 | 4  | 4  |
| Ccna2      | -1.19919 | 3.641712 | 5.377476 | 0.020398 | 1        | 0  | 12 | 7  | 27 | 3  | 6  | 0  | 5  | 2  | 4  |
| LOC10816f  | -1.17213 | 1.565389 | 5.023045 | 0.025012 | 1        | 8  | 33 | 27 | 19 | 8  | 8  | 9  | 12 | 5  | 3  |
| C230037L1  | -1.16242 | 1.425487 | 4.838072 | 0.027838 | 1        | 31 | 21 | 19 | 27 | 17 | 18 | 6  | 14 | 3  | 4  |
| Zfp970     | -1.15511 | 1.233089 | 3.905194 | 0.048137 | 1        | 2  | 9  | 21 | 14 | 21 | 0  | 3  | 7  | 4  | 10 |
| Ifi44      | -1.15285 | 2.580441 | 5.281123 | 0.021558 | 1        | 22 | 26 | 41 | 24 | 19 | 11 | 19 | 8  | 5  | 8  |
| Ube2cbp    | -1.13657 | 1.17595  | 4.046604 | 0.04426  | 1        | 8  | 8  | 17 | 11 | 4  | 6  | 3  | 6  | 1  | 2  |
| 1700086L1  | -1.12696 | 1.761141 | 10.24345 | 0.001372 | 0.406676 | 17 | 28 | 36 | 40 | 34 | 6  | 15 | 5  | 21 | 13 |
| Zfp879     | -1.11887 | 1.158359 | 4.166267 | 0.041237 | 1        | 9  | 10 | 11 | 14 | 11 | 0  | 8  | 8  | 6  | 0  |
| Gm11802    | -1.11675 | 1.905136 | 5.109422 | 0.023796 | 1        | 7  | 2  | 20 | 20 | 13 | 8  | 7  | 2  | 2  | 4  |

|           |          |          |          |          |          |    |    |     |    |    |    |    |    |    |    |
|-----------|----------|----------|----------|----------|----------|----|----|-----|----|----|----|----|----|----|----|
| Ucp3      | -1.09293 | 1.354878 | 4.480531 | 0.034283 | 1        | 1  | 6  | 16  | 9  | 19 | 0  | 4  | 6  | 7  | 3  |
| Gm40466   | -1.08777 | 2.081532 | 3.969618 | 0.046328 | 1        | 19 | 4  | 7   | 15 | 11 | 0  | 3  | 11 | 2  | 6  |
| Mdfi      | -1.0837  | 4.449688 | 5.086552 | 0.024112 | 1        | 14 | 2  | 15  | 2  | 5  | 5  | 2  | 6  | 0  | 2  |
| Hmgb2     | -1.07719 | 5.203583 | 11.3018  | 0.000774 | 0.357189 | 14 | 11 | 30  | 34 | 8  | 13 | 10 | 3  | 8  | 4  |
| Gm4604    | -1.07568 | 1.388454 | 4.575913 | 0.032424 | 1        | 10 | 2  | 4   | 14 | 8  | 3  | 4  | 5  | 1  | 2  |
| Foxq1     | -1.07336 | 6.556928 | 10.35526 | 0.001291 | 0.406402 | 23 | 9  | 9   | 11 | 17 | 9  | 0  | 9  | 6  | 4  |
| Rbm12b1   | -1.06884 | 1.486739 | 4.044887 | 0.044305 | 1        | 21 | 7  | 8   | 7  | 25 | 2  | 5  | 9  | 9  | 4  |
| Aass      | -1.06593 | 1.638363 | 4.179968 | 0.040904 | 1        | 10 | 7  | 8   | 20 | 10 | 5  | 7  | 5  | 2  | 3  |
| Tst       | -1.0655  | 2.181935 | 5.119243 | 0.023662 | 1        | 10 | 5  | 11  | 19 | 6  | 6  | 6  | 0  | 4  | 4  |
| Itgam     | -1.0423  | 6.288008 | 8.751705 | 0.003093 | 0.574754 | 10 | 7  | 12  | 13 | 19 | 3  | 10 | 0  | 4  | 8  |
| Fbxo5     | -1.03775 | 2.669881 | 3.911832 | 0.047947 | 1        | 15 | 3  | 18  | 2  | 12 | 8  | 6  | 6  | 0  | 1  |
| Klrg2     | -1.03709 | 5.343846 | 11.19913 | 0.000818 | 0.357189 | 11 | 13 | 14  | 32 | 25 | 13 | 0  | 4  | 16 | 6  |
| 1700030J2 | -1.03324 | 2.043224 | 5.320637 | 0.021074 | 1        | 33 | 31 | 41  | 34 | 17 | 10 | 27 | 8  | 17 | 5  |
| Lmx1b     | -1.02373 | 3.992667 | 4.718571 | 0.029839 | 1        | 5  | 6  | 12  | 2  | 9  | 0  | 1  | 4  | 5  | 4  |
| Spc25     | -1.02215 | 3.630913 | 4.967523 | 0.025828 | 1        | 19 | 15 | 8   | 13 | 5  | 2  | 4  | 13 | 6  | 1  |
| Efcab12   | -1.01961 | 1.406274 | 5.06264  | 0.024447 | 1        | 26 | 16 | 15  | 12 | 14 | 7  | 13 | 5  | 3  | 8  |
| Slc25a42  | -1.01172 | 2.072447 | 6.343732 | 0.011178 | 0.9915   | 16 | 19 | 39  | 18 | 16 | 7  | 17 | 7  | 12 | 3  |
| Tmem194t  | -1.00813 | 2.449044 | 6.785623 | 0.009189 | 0.924097 | 15 | 12 | 10  | 21 | 28 | 4  | 8  | 5  | 14 | 6  |
| Card14    | -1.0072  | 3.3965   | 5.80128  | 0.016015 | 1        | 25 | 12 | 12  | 5  | 18 | 5  | 8  | 6  | 9  | 4  |
| Gm35113   | -1.00422 | 1.839731 | 4.327311 | 0.037505 | 1        | 21 | 16 | 22  | 37 | 34 | 17 | 21 | 13 | 5  | 1  |
| Fkbp10    | -0.99513 | 3.050188 | 11.01722 | 0.000903 | 0.374472 | 23 | 33 | 56  | 62 | 43 | 24 | 22 | 11 | 17 | 17 |
| Serpinc1  | -0.99321 | 2.170832 | 5.094257 | 0.024005 | 1        | 17 | 17 | 21  | 12 | 20 | 5  | 4  | 9  | 6  | 13 |
| Cbx2      | -0.99247 | 2.539035 | 7.422747 | 0.00644  | 0.774921 | 22 | 11 | 43  | 40 | 15 | 14 | 13 | 10 | 11 | 6  |
| Nfatc4    | -0.98833 | 2.469069 | 6.35922  | 0.011677 | 0.9915   | 12 | 10 | 22  | 14 | 7  | 0  | 4  | 5  | 8  | 10 |
| Tbc1d2    | -0.97436 | 4.201587 | 4.100906 | 0.04286  | 1        | 3  | 1  | 17  | 4  | 6  | 3  | 0  | 0  | 10 | 0  |
| Layn      | -0.97208 | 2.262425 | 4.878767 | 0.027189 | 1        | 30 | 19 | 34  | 18 | 31 | 22 | 1  | 8  | 11 | 15 |
| Upp1      | -0.9699  | 4.707061 | 4.428126 | 0.035351 | 1        | 6  | 12 | 15  | 13 | 5  | 12 | 4  | 2  | 3  | 1  |
| Gm13840   | -0.96691 | 2.462062 | 3.918055 | 0.04777  | 1        | 27 | 5  | 27  | 30 | 11 | 12 | 7  | 15 | 3  | 5  |
| Polm      | -0.95322 | 2.552648 | 4.735238 | 0.029551 | 1        | 18 | 9  | 6   | 7  | 13 | 6  | 4  | 2  | 8  | 4  |
| 4930522L1 | -0.95245 | 2.94478  | 5.813594 | 0.015903 | 1        | 7  | 11 | 19  | 23 | 19 | 3  | 10 | 5  | 8  | 8  |
| Kcng3     | -0.94634 | 1.92344  | 4.252108 | 0.039202 | 1        | 3  | 7  | 7   | 20 | 14 | 4  | 2  | 7  | 6  | 3  |
| Kcnn2     | -0.94367 | 1.367222 | 5.427071 | 0.019827 | 1        | 16 | 29 | 12  | 31 | 20 | 4  | 15 | 7  | 13 | 10 |
| Gm31105   | -0.94236 | 1.679691 | 4.808626 | 0.028318 | 1        | 7  | 5  | 35  | 18 | 14 | 5  | 11 | 6  | 3  | 8  |
| Qtrtd1    | -0.92391 | 2.373979 | 5.488044 | 0.019147 | 1        | 8  | 39 | 24  | 34 | 23 | 12 | 12 | 11 | 17 | 7  |
| Calcr1    | -0.92037 | 2.382749 | 4.084194 | 0.043286 | 1        | 52 | 27 | 37  | 63 | 20 | 25 | 22 | 5  | 28 | 10 |
| Mettl25   | -0.91799 | 2.261467 | 6.626588 | 0.010047 | 0.943727 | 28 | 16 | 33  | 36 | 28 | 10 | 7  | 10 | 19 | 16 |
| Zfp780b   | -0.91751 | 2.846673 | 8.557969 | 0.00344  | 0.590595 | 36 | 28 | 40  | 43 | 35 | 14 | 19 | 17 | 23 | 10 |
| Fam83h    | -0.91169 | 6.331429 | 12.48168 | 0.000411 | 0.275262 | 25 | 15 | 39  | 22 | 23 | 4  | 14 | 15 | 17 | 6  |
| Zfp526    | -0.90782 | 3.504184 | 12.4374  | 0.000421 | 0.275262 | 31 | 48 | 54  | 78 | 33 | 30 | 13 | 18 | 28 | 20 |
| Adams10   | -0.90333 | 3.31064  | 6.214803 | 0.012669 | 1        | 68 | 28 | 34  | 76 | 54 | 24 | 27 | 22 | 30 | 17 |
| St3gal1   | -0.89095 | 2.912395 | 6.258648 | 0.012359 | 0.9915   | 32 | 42 | 40  | 55 | 23 | 22 | 13 | 17 | 14 | 21 |
| Hyal2     | -0.88992 | 3.975811 | 11.23338 | 0.000803 | 0.357189 | 17 | 37 | 39  | 47 | 46 | 16 | 19 | 16 | 31 | 5  |
| Ctso      | -0.8842  | 3.64109  | 6.542488 | 0.010533 | 0.954012 | 16 | 22 | 44  | 23 | 19 | 8  | 6  | 14 | 16 | 12 |
| C330018D: | -0.87461 | 3.702795 | 6.258456 | 0.01236  | 0.9915   | 30 | 22 | 47  | 16 | 31 | 10 | 13 | 3  | 26 | 16 |
| Slc34a2   | -0.86829 | 6.161563 | 5.596521 | 0.017996 | 1        | 8  | 6  | 22  | 5  | 11 | 4  | 6  | 2  | 9  | 3  |
| LOC10816: | -0.86594 | 4.137221 | 5.430425 | 0.019789 | 1        | 13 | 1  | 20  | 15 | 8  | 5  | 0  | 7  | 13 | 1  |
| Dtwd1     | -0.86582 | 2.718265 | 7.100577 | 0.007706 | 0.854323 | 15 | 16 | 29  | 50 | 14 | 12 | 10 | 20 | 8  | 6  |
| Phf11d    | -0.86298 | 4.216299 | 4.300429 | 0.038103 | 1        | 3  | 12 | 15  | 19 | 2  | 2  | 9  | 2  | 2  | 8  |
| Tpcn2     | -0.85831 | 3.876267 | 6.052193 | 0.013889 | 1        | 22 | 12 | 34  | 44 | 6  | 19 | 13 | 9  | 13 | 0  |
| Papss2    | -0.85764 | 5.380007 | 7.295254 | 0.006914 | 0.802346 | 18 | 8  | 24  | 23 | 9  | 5  | 11 | 7  | 11 | 4  |
| Cdk5rap1  | -0.85212 | 3.012158 | 5.302283 | 0.021297 | 1        | 35 | 36 | 55  | 23 | 25 | 13 | 18 | 18 | 18 | 16 |
| Sh3rf2    | -0.84982 | 3.721669 | 4.054454 | 0.044055 | 1        | 4  | 7  | 16  | 10 | 2  | 10 | 0  | 3  | 4  | 1  |
| Lfng      | -0.84753 | 4.213977 | 11.18962 | 0.000823 | 0.357189 | 53 | 51 | 75  | 41 | 33 | 42 | 23 | 29 | 16 | 12 |
| Fcor      | -0.84093 | 1.148237 | 4.186815 | 0.04074  | 1        | 13 | 18 | 18  | 12 | 15 | 6  | 8  | 7  | 11 | 5  |
| 2610306M  | -0.83841 | 2.160691 | 4.152341 | 0.041577 | 1        | 34 | 41 | 41  | 29 | 22 | 20 | 13 | 20 | 12 | 16 |
| Gnb1l     | -0.82249 | 2.493923 | 4.811696 | 0.028267 | 1        | 17 | 12 | 21  | 31 | 11 | 6  | 12 | 1  | 13 | 11 |
| Psmb9     | -0.81819 | 4.161975 | 8.014903 | 0.004639 | 0.689698 | 16 | 21 | 30  | 39 | 12 | 11 | 11 | 9  | 16 | 9  |
| Ttc8      | -0.81598 | 2.910489 | 5.127678 | 0.023547 | 1        | 15 | 7  | 37  | 41 | 41 | 20 | 12 | 11 | 12 | 11 |
| Gpt       | -0.81493 | 5.070622 | 8.247711 | 0.00408  | 0.644276 | 16 | 14 | 14  | 30 | 25 | 8  | 18 | 8  | 7  | 7  |
| Fgd2      | -0.80673 | 2.775318 | 4.784929 | 0.02871  | 1        | 19 | 4  | 21  | 14 | 18 | 4  | 12 | 6  | 11 | 4  |
| Zfp213    | -0.80628 | 2.018394 | 5.165976 | 0.023034 | 1        | 12 | 10 | 14  | 21 | 15 | 10 | 8  | 3  | 11 | 3  |
| Shb       | -0.80071 | 4.595778 | 4.967727 | 0.025825 | 1        | 17 | 9  | 17  | 2  | 10 | 6  | 3  | 3  | 11 | 4  |
| Tfap4     | -0.80036 | 2.961479 | 6.093142 | 0.013571 | 1        | 35 | 22 | 31  | 49 | 19 | 16 | 17 | 15 | 11 | 16 |
| Prpsap2   | -0.79897 | 3.761612 | 8.911742 | 0.002833 | 0.552875 | 31 | 78 | 111 | 73 | 85 | 21 | 49 | 33 | 67 | 19 |
| Zfp839    | -0.7959  | 4.03681  | 8.18987  | 0.004212 | 0.651242 | 28 | 31 | 38  | 56 | 37 | 12 | 35 | 11 | 25 | 11 |
| Il18      | -0.79016 | 6.324953 | 14.07671 | 0.000176 | 0.218121 | 47 | 32 | 41  | 43 | 56 | 28 | 10 | 31 | 22 | 18 |
| Lypd6b    | -0.78512 | 3.162364 | 5.527916 | 0.018715 | 1        | 25 | 18 | 60  | 68 | 38 | 5  | 33 | 13 | 35 | 14 |
| Ttc12     | -0.77707 | 2.661642 | 6.101587 | 0.013506 | 1        | 50 | 41 | 54  | 79 | 22 | 13 | 38 | 21 | 22 | 26 |

|           |          |          |          |          |          |     |     |     |     |     |     |     |     |     |    |
|-----------|----------|----------|----------|----------|----------|-----|-----|-----|-----|-----|-----|-----|-----|-----|----|
| B230311B  | -0.77351 | 1.359375 | 4.235227 | 0.039593 | 1        | 13  | 21  | 28  | 33  | 18  | 9   | 15  | 10  | 15  | 7  |
| Mgmt      | -0.76339 | 2.866177 | 4.234794 | 0.039603 | 1        | 14  | 25  | 23  | 27  | 11  | 4   | 11  | 4   | 11  | 19 |
| Irf5      | -0.76286 | 3.213576 | 4.024023 | 0.044857 | 1        | 12  | 17  | 7   | 22  | 16  | 0   | 13  | 13  | 8   | 4  |
| Mapkapk3  | -0.76139 | 5.805963 | 7.302727 | 0.006885 | 0.801601 | 16  | 5   | 31  | 28  | 11  | 11  | 16  | 10  | 5   | 3  |
| Tmem200c  | -0.75072 | 1.254296 | 4.239098 | 0.039503 | 1        | 14  | 15  | 16  | 33  | 20  | 10  | 10  | 14  | 6   | 9  |
| Slc13a3   | -0.74556 | 3.157902 | 3.902516 | 0.048214 | 1        | 67  | 59  | 68  | 134 | 72  | 40  | 38  | 26  | 52  | 43 |
| Pard6b    | -0.72917 | 4.98795  | 6.534668 | 0.010579 | 0.954012 | 29  | 15  | 21  | 19  | 22  | 14  | 2   | 13  | 19  | 7  |
| Ercc6     | -0.72101 | 3.343364 | 6.725346 | 0.009505 | 0.931074 | 34  | 48  | 40  | 64  | 39  | 17  | 12  | 25  | 37  | 25 |
| Fgd6      | -0.72032 | 4.18127  | 4.795515 | 0.028534 | 1        | 11  | 8   | 29  | 12  | 15  | 8   | 1   | 19  | 2   | 8  |
| 6030419C1 | -0.71597 | 4.406746 | 4.781324 | 0.02877  | 1        | 84  | 272 | 289 | 210 | 191 | 94  | 236 | 84  | 88  | 65 |
| Fzd7      | -0.71428 | 3.947266 | 9.497232 | 0.002058 | 0.479868 | 89  | 66  | 112 | 82  | 56  | 41  | 62  | 44  | 32  | 33 |
| Serac1    | -0.70957 | 3.085538 | 7.709963 | 0.005492 | 0.725022 | 49  | 21  | 44  | 58  | 44  | 25  | 18  | 25  | 27  | 17 |
| Myd88     | -0.70697 | 4.72838  | 11.11825 | 0.000855 | 0.361801 | 37  | 22  | 77  | 36  | 59  | 26  | 19  | 22  | 35  | 18 |
| A430046D  | -0.69771 | 2.031202 | 5.315246 | 0.02114  | 1        | 37  | 17  | 33  | 33  | 30  | 13  | 27  | 12  | 19  | 9  |
| Casp6     | -0.69365 | 3.719113 | 6.31332  | 0.011983 | 0.9915   | 14  | 18  | 45  | 31  | 24  | 19  | 12  | 11  | 12  | 14 |
| Pln       | -0.68723 | 2.22915  | 4.193953 | 0.040568 | 1        | 26  | 36  | 64  | 83  | 29  | 11  | 41  | 23  | 27  | 20 |
| Fcer1g    | -0.68576 | 2.351124 | 4.387758 | 0.036198 | 1        | 33  | 38  | 42  | 78  | 43  | 20  | 32  | 29  | 28  | 15 |
| Fkbp14    | -0.68124 | 3.661386 | 14.21703 | 0.000163 | 0.217041 | 92  | 78  | 111 | 111 | 109 | 60  | 69  | 47  | 55  | 39 |
| C1ql4     | -0.67532 | 2.097224 | 4.497815 | 0.033938 | 1        | 37  | 43  | 31  | 49  | 39  | 26  | 17  | 32  | 26  | 9  |
| Fastkd1   | -0.67459 | 4.264896 | 4.799628 | 0.028466 | 1        | 26  | 40  | 46  | 31  | 36  | 21  | 23  | 15  | 26  | 13 |
| Them5     | -0.67432 | 2.671466 | 4.744473 | 0.029393 | 1        | 55  | 35  | 92  | 114 | 36  | 33  | 52  | 49  | 20  | 18 |
| Ramp3     | -0.67272 | 2.781909 | 4.278989 | 0.038586 | 1        | 71  | 63  | 71  | 89  | 26  | 32  | 42  | 48  | 31  | 20 |
| Fgf7      | -0.66797 | 1.952963 | 4.392119 | 0.036105 | 1        | 34  | 18  | 32  | 49  | 29  | 25  | 15  | 15  | 18  | 13 |
| Exd2      | -0.66141 | 2.622812 | 4.172487 | 0.041085 | 1        | 48  | 29  | 48  | 20  | 41  | 9   | 27  | 27  | 21  | 19 |
| Slc46a1   | -0.66067 | 3.308203 | 6.148945 | 0.013149 | 1        | 41  | 45  | 124 | 96  | 57  | 27  | 53  | 59  | 31  | 21 |
| Nupl2     | -0.65907 | 2.824836 | 4.519029 | 0.03352  | 1        | 27  | 28  | 28  | 30  | 33  | 21  | 20  | 18  | 13  | 9  |
| Ly6a      | -0.64151 | 7.221271 | 8.046777 | 0.004558 | 0.683314 | 89  | 61  | 55  | 74  | 54  | 25  | 53  | 38  | 40  | 31 |
| Supv311   | -0.63954 | 3.306218 | 4.495179 | 0.033991 | 1        | 46  | 37  | 71  | 108 | 24  | 38  | 39  | 24  | 35  | 16 |
| Plppr2    | -0.63662 | 3.66307  | 9.511866 | 0.002041 | 0.479868 | 90  | 94  | 123 | 96  | 102 | 66  | 60  | 66  | 67  | 26 |
| Qsox2     | -0.63514 | 3.618463 | 6.528526 | 0.010616 | 0.954012 | 20  | 36  | 54  | 59  | 43  | 9   | 38  | 30  | 24  | 15 |
| Tuft1     | -0.63511 | 6.354149 | 5.126788 | 0.023559 | 1        | 13  | 15  | 10  | 35  | 15  | 19  | 3   | 13  | 9   | 4  |
| Tpd52l1   | -0.63375 | 3.242343 | 4.742093 | 0.029433 | 1        | 29  | 28  | 63  | 69  | 18  | 16  | 22  | 27  | 25  | 19 |
| Golga7    | -0.63184 | 3.784102 | 5.659209 | 0.017364 | 1        | 18  | 20  | 57  | 52  | 64  | 28  | 24  | 22  | 27  | 14 |
| Idh2      | -0.62852 | 4.746269 | 9.586283 | 0.00196  | 0.470174 | 127 | 60  | 160 | 163 | 59  | 59  | 57  | 78  | 56  | 54 |
| Mir6236   | -0.62629 | 4.870336 | 5.180945 | 0.022836 | 1        | 166 | 111 | 158 | 165 | 66  | 125 | 37  | 92  | 63  | 51 |
| Ntmt1     | -0.625   | 3.602929 | 4.988733 | 0.025513 | 1        | 77  | 74  | 134 | 92  | 76  | 48  | 44  | 48  | 55  | 52 |
| Zfp1      | -0.62096 | 3.573561 | 8.037288 | 0.004582 | 0.684053 | 67  | 55  | 68  | 99  | 56  | 42  | 51  | 35  | 36  | 28 |
| Wnt6      | -0.6201  | 4.057341 | 8.632589 | 0.003302 | 0.581129 | 68  | 69  | 118 | 183 | 87  | 59  | 64  | 48  | 69  | 44 |
| Stx3      | -0.61624 | 5.012492 | 9.488643 | 0.002067 | 0.479868 | 69  | 47  | 75  | 141 | 53  | 37  | 44  | 51  | 49  | 29 |
| Fam45a    | -0.60918 | 4.326465 | 10.62002 | 0.001119 | 0.403208 | 111 | 115 | 172 | 136 | 98  | 87  | 73  | 72  | 70  | 53 |
| Uckl1     | -0.6089  | 4.49046  | 6.521093 | 0.01066  | 0.954012 | 55  | 49  | 87  | 89  | 47  | 41  | 46  | 19  | 47  | 28 |
| Card10    | -0.60387 | 5.294429 | 5.445957 | 0.019614 | 1        | 173 | 106 | 190 | 177 | 134 | 126 | 95  | 104 | 37  | 75 |
| Thbs1     | -0.60121 | 4.739543 | 4.920666 | 0.026537 | 1        | 34  | 41  | 29  | 54  | 29  | 31  | 25  | 21  | 17  | 13 |
| Amn1      | -0.59945 | 3.460758 | 5.702702 | 0.016939 | 1        | 51  | 39  | 90  | 64  | 42  | 31  | 28  | 33  | 38  | 28 |
| Cxcl16    | -0.5949  | 3.997766 | 5.377965 | 0.020393 | 1        | 45  | 37  | 60  | 51  | 32  | 35  | 28  | 18  | 26  | 20 |
| Kpna6     | -0.59286 | 4.650398 | 12.233   | 0.00047  | 0.281521 | 73  | 103 | 169 | 166 | 106 | 64  | 64  | 57  | 102 | 57 |
| Szt2      | -0.59104 | 3.135575 | 4.590996 | 0.03214  | 1        | 28  | 22  | 56  | 55  | 45  | 27  | 21  | 22  | 31  | 14 |
| Amt       | -0.58938 | 3.97767  | 4.038368 | 0.044477 | 1        | 29  | 22  | 59  | 21  | 31  | 18  | 13  | 26  | 26  | 9  |
| Cyp39a1   | -0.5879  | 4.920224 | 8.647402 | 0.003275 | 0.580451 | 82  | 70  | 86  | 92  | 45  | 47  | 27  | 47  | 49  | 42 |
| Fastkd5   | -0.58578 | 2.512131 | 4.039281 | 0.044453 | 1        | 29  | 14  | 25  | 35  | 35  | 14  | 10  | 16  | 22  | 16 |
| Adrb1     | -0.5833  | 5.044413 | 5.139487 | 0.023388 | 1        | 46  | 35  | 42  | 55  | 14  | 12  | 16  | 28  | 38  | 15 |
| Asun      | -0.57885 | 4.614888 | 5.747495 | 0.016512 | 1        | 66  | 24  | 85  | 83  | 51  | 34  | 46  | 29  | 30  | 33 |
| Slc7a6os  | -0.57825 | 4.042811 | 5.855958 | 0.015524 | 1        | 61  | 69  | 81  | 122 | 58  | 49  | 39  | 41  | 61  | 32 |
| Gss       | -0.57365 | 4.448606 | 7.613378 | 0.005794 | 0.735366 | 72  | 39  | 79  | 73  | 63  | 25  | 29  | 58  | 42  | 32 |
| Zfp182    | -0.57268 | 3.08216  | 4.058782 | 0.043942 | 1        | 30  | 26  | 40  | 34  | 15  | 9   | 14  | 20  | 20  | 19 |
| Gprin1    | -0.57242 | 2.467186 | 4.176447 | 0.04099  | 1        | 71  | 49  | 52  | 46  | 54  | 36  | 45  | 30  | 26  | 25 |
| Wnt4      | -0.56945 | 7.848365 | 6.107697 | 0.013459 | 1        | 37  | 27  | 55  | 23  | 17  | 28  | 16  | 9   | 19  | 19 |
| Rad52     | -0.56746 | 3.237496 | 5.6145   | 0.017812 | 1        | 35  | 22  | 71  | 90  | 58  | 37  | 21  | 33  | 35  | 27 |
| Ctbp2     | -0.56335 | 5.561838 | 13.42947 | 0.000248 | 0.247537 | 91  | 57  | 141 | 122 | 92  | 80  | 51  | 35  | 84  | 38 |
| Rfwd3     | -0.56058 | 4.954923 | 12.23596 | 0.000469 | 0.281521 | 96  | 74  | 115 | 150 | 92  | 76  | 76  | 49  | 59  | 44 |
| Dvl2      | -0.55923 | 4.235044 | 6.29199  | 0.012128 | 0.9915   | 39  | 49  | 58  | 73  | 66  | 52  | 31  | 44  | 24  | 16 |
| Gorab     | -0.55832 | 3.613367 | 5.310238 | 0.0212   | 1        | 49  | 27  | 95  | 48  | 34  | 29  | 33  | 36  | 27  | 19 |
| Cep89     | -0.55681 | 3.761766 | 5.659972 | 0.017356 | 1        | 25  | 26  | 35  | 44  | 37  | 25  | 14  | 26  | 9   | 22 |
| Ccdc163   | -0.55237 | 2.600531 | 4.116539 | 0.042466 | 1        | 41  | 19  | 43  | 48  | 29  | 17  | 12  | 40  | 17  | 17 |
| Cbx8      | -0.55014 | 3.410001 | 4.954611 | 0.026021 | 1        | 21  | 32  | 70  | 43  | 47  | 27  | 17  | 28  | 27  | 23 |
| Plk2      | -0.54062 | 5.148643 | 5.658133 | 0.017375 | 1        | 43  | 44  | 41  | 49  | 25  | 29  | 23  | 18  | 24  | 25 |
| Ccdc120   | -0.53817 | 4.536996 | 4.786731 | 0.02868  | 1        | 20  | 34  | 29  | 23  | 20  | 14  | 15  | 23  | 15  | 8  |
| Dmpk      | -0.53486 | 3.93136  | 5.98142  | 0.014457 | 1        | 79  | 60  | 70  | 89  | 59  | 30  | 32  | 52  | 66  | 32 |

|           |          |          |          |          |          |     |      |      |      |      |      |      |      |      |     |     |
|-----------|----------|----------|----------|----------|----------|-----|------|------|------|------|------|------|------|------|-----|-----|
| Dnajc17   | -0.53151 | 4.147079 | 7.093844 | 0.007735 | 0.854323 | 51  | 38   | 70   | 126  | 64   | 32   | 47   | 42   | 45   | 35  |     |
| Dnajc19   | -0.53059 | 3.883609 | 5.347244 | 0.020755 |          | 1   | 52   | 61   | 81   | 78   | 71   | 30   | 43   | 55   | 38  | 37  |
| Ncapd3    | -0.52725 | 4.129635 | 6.683951 | 0.009728 | 0.941571 | 59  | 47   | 94   | 113  | 53   | 39   | 38   | 65   | 40   | 30  |     |
| Sox9      | -0.52666 | 6.660992 | 8.627414 | 0.003311 | 0.581129 | 207 | 172  | 221  | 217  | 165  | 123  | 117  | 129  | 110  | 107 |     |
| Epb41l4ao | -0.52467 | 3.590946 | 4.996561 | 0.025398 |          | 1   | 69   | 32   | 79   | 99   | 68   | 41   | 50   | 43   | 37  | 32  |
| Mterf4    | -0.52304 | 3.588643 | 5.20644  | 0.022503 |          | 1   | 75   | 40   | 114  | 103  | 39   | 51   | 53   | 37   | 38  | 35  |
| Smpd4     | -0.52301 | 3.815314 | 4.212132 | 0.040136 |          | 1   | 50   | 26   | 91   | 60   | 54   | 21   | 31   | 37   | 45  | 29  |
| Smpd2     | -0.51669 | 3.829367 | 4.801476 | 0.028435 |          | 1   | 17   | 39   | 61   | 71   | 34   | 25   | 18   | 15   | 39  | 31  |
| Mkrn2     | -0.51609 | 4.041334 | 5.453979 | 0.019524 |          | 1   | 116  | 57   | 118  | 103  | 68   | 59   | 73   | 75   | 34  | 36  |
| Asl       | -0.50914 | 3.538609 | 3.918838 | 0.047748 |          | 1   | 40   | 19   | 70   | 45   | 37   | 36   | 15   | 28   | 28  | 17  |
| Dhrsx     | -0.50747 | 4.345669 | 4.83756  | 0.027846 |          | 1   | 74   | 55   | 102  | 84   | 77   | 52   | 66   | 46   | 40  | 33  |
| Lrrc61    | -0.50565 | 4.398593 | 5.786412 | 0.016151 |          | 1   | 60   | 71   | 112  | 152  | 84   | 44   | 63   | 87   | 36  | 51  |
| Gm10516   | -0.50232 | 3.740162 | 6.42341  | 0.011263 | 0.980859 | 38  | 56   | 65   | 73   | 60   | 27   | 42   | 43   | 40   | 25  |     |
| Chic2     | -0.49305 | 5.437928 | 6.575772 | 0.010338 | 0.951656 | 59  | 76   | 64   | 110  | 71   | 38   | 39   | 52   | 67   | 36  |     |
| Nmd3      | -0.49229 | 4.225998 | 4.505748 | 0.033781 |          | 1   | 85   | 60   | 124  | 88   | 74   | 50   | 50   | 72   | 34  | 52  |
| Slc25a15  | -0.49159 | 3.749874 | 4.284771 | 0.038455 |          | 1   | 34   | 64   | 72   | 92   | 45   | 32   | 53   | 28   | 39  | 33  |
| Fxyd5     | -0.48797 | 3.222952 | 4.133769 | 0.042036 |          | 1   | 113  | 69   | 89   | 100  | 75   | 66   | 61   | 59   | 42  | 47  |
| Iffo1     | -0.48709 | 2.695993 | 4.286157 | 0.038424 |          | 1   | 60   | 49   | 71   | 82   | 57   | 30   | 42   | 43   | 40  | 38  |
| Dck       | -0.48559 | 3.516315 | 3.933968 | 0.04732  |          | 1   | 33   | 46   | 59   | 43   | 64   | 24   | 49   | 34   | 25  | 21  |
| Ift80     | -0.48052 | 3.917653 | 4.174823 | 0.041029 |          | 1   | 65   | 79   | 107  | 86   | 106  | 50   | 62   | 31   | 67  | 62  |
| Parn      | -0.48022 | 4.678136 | 9.530203 | 0.002021 | 0.479868 | 76  | 84   | 127  | 127  | 101  | 60   | 65   | 65   | 71   | 53  |     |
| Mpzl2     | -0.47648 | 7.765993 | 4.030212 | 0.044692 |          | 1   | 28   | 29   | 31   | 60   | 21   | 10   | 31   | 12   | 12  | 36  |
| Pycrl     | -0.4738  | 4.210852 | 7.722694 | 0.005453 | 0.725022 | 78  | 90   | 141  | 162  | 74   | 78   | 72   | 65   | 58   | 56  |     |
| Kcnmb2    | -0.47362 | 2.600111 | 3.947467 | 0.046942 |          | 1   | 61   | 48   | 90   | 101  | 40   | 45   | 54   | 28   | 51  | 28  |
| D1300091  | -0.47267 | 6.103852 | 4.519563 | 0.033509 |          | 1   | 71   | 70   | 120  | 115  | 61   | 60   | 34   | 73   | 49  | 47  |
| Bcas2     | -0.46609 | 5.417775 | 9.02761  | 0.002659 | 0.549837 | 145 | 171  | 197  | 165  | 159  | 107  | 121  | 103  | 111  | 85  |     |
| Cops7a    | -0.4608  | 5.506749 | 4.200892 | 0.040403 |          | 1   | 90   | 206  | 273  | 242  | 260  | 89   | 192  | 114  | 158 | 116 |
| Orai1     | -0.45597 | 3.93964  | 5.668329 | 0.017274 |          | 1   | 56   | 47   | 83   | 104  | 75   | 44   | 44   | 55   | 57  | 26  |
| Ankrd34c  | -0.45392 | 4.154921 | 4.095315 | 0.043002 |          | 1   | 68   | 50   | 66   | 76   | 67   | 32   | 24   | 46   | 42  | 57  |
| Ccdc191   | -0.45158 | 5.074403 | 4.420123 | 0.035517 |          | 1   | 97   | 67   | 138  | 59   | 51   | 73   | 50   | 38   | 55  | 42  |
| Sh3gl1    | -0.45131 | 4.558828 | 5.608144 | 0.017877 |          | 1   | 46   | 58   | 127  | 126  | 79   | 51   | 45   | 73   | 63  | 34  |
| Ltbp4     | -0.44984 | 4.629179 | 4.418702 | 0.035547 |          | 1   | 66   | 57   | 54   | 53   | 40   | 39   | 33   | 22   | 47  | 31  |
| Mknk1     | -0.44481 | 3.805907 | 5.033932 | 0.024855 |          | 1   | 71   | 60   | 126  | 143  | 95   | 82   | 71   | 50   | 55  | 47  |
| Nsmce1    | -0.44258 | 4.381577 | 4.568988 | 0.032556 |          | 1   | 104  | 64   | 136  | 171  | 61   | 109  | 79   | 52   | 43  | 46  |
| Rnf2      | -0.44028 | 4.866555 | 5.938566 | 0.014813 |          | 1   | 41   | 75   | 89   | 135  | 85   | 57   | 54   | 39   | 50  | 62  |
| B2m       | -0.44004 | 8.136567 | 5.762054 | 0.016376 |          | 1   | 1092 | 1194 | 1857 | 3271 | 1710 | 1129 | 1788 | 1024 | 894 | 798 |
| Slc25a33  | -0.43966 | 4.747529 | 12.45943 | 0.000416 | 0.275262 | 236 | 238  | 346  | 368  | 203  | 186  | 202  | 185  | 178  | 123 |     |
| Prmt9     | -0.43844 | 4.229428 | 3.871051 | 0.049126 |          | 1   | 108  | 87   | 123  | 127  | 119  | 81   | 77   | 65   | 73  | 62  |
| Palld     | -0.43587 | 7.542297 | 13.60971 | 0.000225 | 0.245312 | 143 | 122  | 223  | 215  | 199  | 147  | 114  | 99   | 130  | 79  |     |
| Mafk      | -0.43552 | 5.220205 | 3.967459 | 0.046388 |          | 1   | 35   | 38   | 53   | 37   | 50   | 31   | 33   | 30   | 20  | 22  |
| Gpank1    | -0.43374 | 3.771309 | 4.024482 | 0.044844 |          | 1   | 76   | 61   | 77   | 120  | 50   | 52   | 48   | 40   | 51  | 48  |
| Stat1     | -0.4305  | 4.549727 | 3.923933 | 0.047603 |          | 1   | 71   | 112  | 148  | 123  | 127  | 94   | 79   | 81   | 63  | 55  |
| Ctsh      | -0.43006 | 6.29707  | 5.70912  | 0.016877 |          | 1   | 75   | 31   | 91   | 60   | 54   | 40   | 45   | 53   | 36  | 23  |
| Chsy1     | -0.42804 | 4.668771 | 6.405786 | 0.011375 | 0.981351 | 94  | 65   | 125  | 122  | 63   | 60   | 59   | 61   | 66   | 48  |     |
| Ldlrap1   | -0.42689 | 6.48072  | 4.169651 | 0.041154 |          | 1   | 33   | 23   | 69   | 46   | 46   | 29   | 39   | 24   | 40  | 6   |
| Ephb3     | -0.42587 | 7.237128 | 5.115699 | 0.02371  |          | 1   | 51   | 63   | 73   | 93   | 96   | 59   | 29   | 56   | 42  | 52  |
| Mical3    | -0.4237  | 5.479113 | 6.453259 | 0.011075 | 0.977017 | 163 | 128  | 320  | 256  | 192  | 124  | 157  | 123  | 144  | 112 |     |
| Lsr       | -0.42016 | 6.045309 | 4.226976 | 0.039786 |          | 1   | 46   | 54   | 64   | 63   | 43   | 50   | 37   | 25   | 32  | 29  |
| Fzd2      | -0.41919 | 4.403527 | 4.788195 | 0.028655 |          | 1   | 86   | 93   | 118  | 152  | 78   | 82   | 82   | 74   | 64  | 36  |
| Car5b     | -0.41421 | 6.201812 | 4.895966 | 0.02692  |          | 1   | 40   | 40   | 51   | 65   | 60   | 41   | 35   | 21   | 47  | 21  |
| Ezh2      | -0.41257 | 5.359906 | 4.894072 | 0.026949 |          | 1   | 108  | 67   | 126  | 118  | 107  | 67   | 85   | 67   | 63  | 56  |
| F11r      | -0.41238 | 8.490776 | 5.115639 | 0.023711 |          | 1   | 57   | 36   | 90   | 92   | 77   | 46   | 31   | 44   | 70  | 32  |
| Smg9      | -0.41091 | 4.219144 | 4.54837  | 0.03295  |          | 1   | 105  | 107  | 160  | 165  | 91   | 113  | 76   | 65   | 88  | 59  |
| Plxnb2    | -0.41032 | 7.839856 | 7.807403 | 0.005203 | 0.725022 | 111 | 103  | 149  | 185  | 73   | 69   | 102  | 93   | 77   | 55  |     |
| Rnaseh2a  | -0.40917 | 4.176532 | 4.666322 | 0.03076  |          | 1   | 100  | 59   | 108  | 120  | 62   | 62   | 52   | 75   | 54  | 43  |
| Acp1      | -0.40731 | 5.671035 | 6.418024 | 0.011297 | 0.980859 | 224 | 225  | 310  | 289  | 298  | 145  | 234  | 244  | 173  | 93  |     |
| Ccdc117   | -0.40614 | 3.922212 | 4.399647 | 0.035946 |          | 1   | 41   | 41   | 103  | 88   | 66   | 36   | 55   | 46   | 49  | 29  |
| Katna1    | -0.40526 | 5.350541 | 5.771266 | 0.01629  |          | 1   | 80   | 53   | 68   | 117  | 52   | 49   | 52   | 51   | 46  | 39  |
| Senp8     | -0.40413 | 4.492666 | 5.084683 | 0.024138 |          | 1   | 129  | 94   | 171  | 169  | 99   | 50   | 117  | 108  | 93  | 58  |
| Gnai3     | -0.40368 | 5.516362 | 4.021486 | 0.044924 |          | 1   | 77   | 66   | 115  | 122  | 92   | 44   | 60   | 45   | 95  | 57  |
| Mthfd1    | -0.40312 | 4.795534 | 4.932757 | 0.026352 |          | 1   | 92   | 72   | 142  | 164  | 131  | 90   | 85   | 54   | 81  | 72  |
| Rps4l     | -0.40221 | 6.382407 | 7.493263 | 0.006193 | 0.759767 | 149 | 184  | 296  | 365  | 247  | 172  | 194  | 139  | 142  | 141 |     |
| Rchy1     | -0.40209 | 5.605883 | 8.941804 | 0.002787 | 0.552875 | 125 | 117  | 209  | 189  | 119  | 113  | 84   | 83   | 102  | 100 |     |
| Bloc1s5   | -0.4016  | 4.841614 | 7.373513 | 0.006619 | 0.791132 | 168 | 134  | 197  | 232  | 142  | 122  | 106  | 141  | 99   | 93  |     |
| Ier5      | -0.40089 | 7.256974 | 5.452738 | 0.019538 |          | 1   | 62   | 62   | 95   | 116  | 95   | 67   | 55   | 60   | 45  | 49  |
| Pdcl3     | -0.40012 | 4.706792 | 4.766448 | 0.028518 |          | 1   | 82   | 111  | 107  | 132  | 75   | 65   | 110  | 53   | 61  | 45  |
| Ccnt1     | -0.39966 | 3.944341 | 4.668955 | 0.030713 |          | 1   | 71   | 62   | 56   | 79   | 49   | 36   | 48   | 50   | 43  | 31  |
| Maz       | -0.39928 | 5.373017 | 4.23942  | 0.039496 |          | 1   | 231  | 196  | 330  | 315  | 236  | 170  | 236  | 146  | 174 | 124 |



|           |          |          |          |          |          |     |     |     |     |     |     |     |     |     |     |     |
|-----------|----------|----------|----------|----------|----------|-----|-----|-----|-----|-----|-----|-----|-----|-----|-----|-----|
| Naa30     | -0.39907 | 4.996786 | 5.190718 | 0.022708 |          | 1   | 140 | 129 | 200 | 238 | 186 | 101 | 114 | 132 | 175 | 60  |
| Slc35b2   | -0.39692 | 4.321913 | 4.549802 | 0.032923 |          | 1   | 63  | 69  | 103 | 146 | 67  | 50  | 63  | 73  | 60  | 40  |
| Gm10419   | -0.3962  | 4.614145 | 7.040544 | 0.007968 | 0.858587 | 218 | 184 | 269 | 367 | 205 | 179 | 178 | 161 | 170 | 114 |     |
| Bcl7c     | -0.39256 | 3.691903 | 4.251408 | 0.039218 |          | 1   | 76  | 48  | 62  | 76  | 46  | 46  | 34  | 33  | 54  | 34  |
| Gas1      | -0.39087 | 7.210612 | 4.342168 | 0.03718  |          | 1   | 40  | 23  | 83  | 50  | 46  | 26  | 44  | 30  | 35  | 21  |
| Oscp1     | -0.38379 | 4.3723   | 4.179263 | 0.040921 |          | 1   | 155 | 118 | 226 | 180 | 139 | 109 | 130 | 94  | 116 | 85  |
| Lig1      | -0.38246 | 6.618005 | 4.370728 | 0.036561 |          | 1   | 294 | 248 | 370 | 513 | 219 | 267 | 250 | 194 | 190 | 161 |
| Mrpl57    | -0.38168 | 5.317352 | 8.351547 | 0.003854 | 0.616163 | 218 | 172 | 313 | 359 | 164 | 172 | 142 | 166 | 155 | 148 |     |
| Mrpl9     | -0.37884 | 4.481942 | 4.565157 | 0.032629 |          | 1   | 61  | 72  | 92  | 101 | 54  | 48  | 52  | 63  | 58  | 29  |
| Aasdhppt  | -0.37378 | 4.27038  | 4.55019  | 0.032915 |          | 1   | 90  | 80  | 132 | 173 | 69  | 75  | 90  | 78  | 68  | 43  |
| Kdm6a     | -0.3733  | 4.810481 | 7.777749 | 0.005289 | 0.725022 | 94  | 79  | 134 | 130 | 79  | 76  | 71  | 73  | 74  | 45  |     |
| Tmem97    | -0.37237 | 4.165034 | 4.185383 | 0.040774 |          | 1   | 53  | 45  | 103 | 80  | 65  | 30  | 54  | 41  | 57  | 43  |
| Mmab      | -0.37221 | 4.648632 | 6.955179 | 0.008358 | 0.889442 | 108 | 95  | 128 | 207 | 111 | 92  | 88  | 90  | 95  | 60  |     |
| Galnt7    | -0.37198 | 7.472614 | 4.335372 | 0.037328 |          | 1   | 85  | 59  | 78  | 78  | 36  | 61  | 39  | 42  | 32  | 47  |
| Rnf111    | -0.37081 | 5.115051 | 6.777318 | 0.009232 | 0.924097 | 108 | 96  | 148 | 155 | 108 | 82  | 68  | 75  | 111 | 68  |     |
| Coq5      | -0.37067 | 5.306082 | 5.364354 | 0.020552 |          | 1   | 274 | 207 | 248 | 318 | 131 | 175 | 125 | 172 | 192 | 116 |
| Pxk       | -0.36921 | 5.23902  | 4.29384  | 0.038251 |          | 1   | 158 | 135 | 167 | 170 | 129 | 145 | 88  | 76  | 103 | 93  |
| Stx16     | -0.36814 | 5.140285 | 4.100123 | 0.04288  |          | 1   | 164 | 105 | 176 | 197 | 154 | 101 | 118 | 111 | 124 | 75  |
| Sdf2      | -0.36534 | 6.373994 | 8.939644 | 0.00279  | 0.552875 | 247 | 280 | 393 | 322 | 334 | 243 | 238 | 211 | 231 | 139 |     |
| Ccdc97    | -0.36531 | 5.399484 | 4.651411 | 0.031028 |          | 1   | 244 | 155 | 298 | 381 | 161 | 227 | 184 | 147 | 131 | 117 |
| Txndc12   | -0.36319 | 5.128982 | 4.402406 | 0.035888 |          | 1   | 64  | 63  | 99  | 136 | 87  | 72  | 64  | 42  | 56  | 59  |
| 1110059Ez | -0.36268 | 5.184016 | 4.481009 | 0.034273 |          | 1   | 109 | 105 | 169 | 171 | 93  | 98  | 90  | 107 | 56  | 73  |
| Tspan14   | -0.36179 | 5.734331 | 6.851169 | 0.008858 | 0.913142 | 121 | 115 | 241 | 174 | 180 | 87  | 149 | 132 | 107 | 77  |     |
| Slc15a4   | -0.36139 | 5.103253 | 6.385985 | 0.011502 | 0.987077 | 131 | 137 | 210 | 238 | 144 | 140 | 150 | 105 | 112 | 65  |     |
| Cdk5rap2  | -0.36041 | 5.410097 | 4.961502 | 0.025918 |          | 1   | 277 | 177 | 361 | 319 | 208 | 192 | 167 | 188 | 194 | 142 |
| Fhd1      | -0.36037 | 5.795806 | 7.044243 | 0.007952 | 0.858587 | 94  | 88  | 180 | 178 | 114 | 68  | 102 | 79  | 113 | 67  |     |
| Zfp639    | -0.35751 | 4.654989 | 3.957174 | 0.046672 |          | 1   | 152 | 146 | 285 | 286 | 130 | 141 | 153 | 136 | 124 | 97  |
| Zfp618    | -0.35624 | 5.194805 | 4.175247 | 0.041019 |          | 1   | 51  | 61  | 65  | 92  | 78  | 51  | 38  | 53  | 51  | 39  |
| 5031439Gt | -0.35313 | 5.244076 | 8.381469 | 0.003791 | 0.610501 | 209 | 146 | 303 | 258 | 224 | 144 | 155 | 148 | 156 | 150 |     |
| Shroom2   | -0.3494  | 4.994007 | 5.562268 | 0.018352 |          | 1   | 182 | 117 | 192 | 288 | 171 | 157 | 113 | 119 | 121 | 116 |
| Drg2      | -0.34819 | 5.241682 | 3.893757 | 0.048466 |          | 1   | 247 | 227 | 361 | 246 | 169 | 182 | 193 | 220 | 140 | 112 |
| Mtmt3     | -0.33759 | 5.118001 | 5.194631 | 0.022657 |          | 1   | 148 | 142 | 169 | 209 | 163 | 102 | 115 | 97  | 143 | 106 |
| Ctss      | -0.33535 | 4.506339 | 3.975784 | 0.046159 |          | 1   | 123 | 72  | 168 | 151 | 110 | 69  | 120 | 79  | 84  | 67  |
| Nrep      | -0.33453 | 4.669332 | 4.549181 | 0.032934 |          | 1   | 142 | 139 | 217 | 234 | 201 | 111 | 140 | 127 | 134 | 116 |
| Secisbp2  | -0.33446 | 4.793957 | 3.868092 | 0.049212 |          | 1   | 102 | 65  | 114 | 124 | 73  | 58  | 69  | 73  | 72  | 50  |
| Nabp2     | -0.32895 | 5.186375 | 5.332095 | 0.020936 |          | 1   | 151 | 127 | 249 | 190 | 183 | 131 | 148 | 141 | 121 | 74  |
| Kdm5a     | -0.3273  | 7.032047 | 7.482538 | 0.00623  | 0.759767 | 394 | 398 | 538 | 622 | 351 | 357 | 296 | 352 | 311 | 244 |     |
| Nxt2      | -0.32567 | 4.620419 | 4.493772 | 0.034019 |          | 1   | 104 | 139 | 179 | 223 | 148 | 98  | 106 | 123 | 117 | 92  |
| Gtf3c3    | -0.32548 | 4.988906 | 4.456222 | 0.034774 |          | 1   | 185 | 173 | 215 | 261 | 138 | 155 | 98  | 145 | 166 | 98  |
| Tmem80    | -0.32344 | 4.470836 | 4.237717 | 0.039535 |          | 1   | 104 | 103 | 159 | 207 | 106 | 114 | 103 | 77  | 84  | 78  |
| Zcchc10   | -0.32007 | 4.780256 | 5.761817 | 0.016378 |          | 1   | 172 | 126 | 221 | 234 | 133 | 149 | 106 | 100 | 135 | 108 |
| Cpsf3     | -0.31972 | 5.417239 | 5.19623  | 0.022636 |          | 1   | 127 | 135 | 241 | 227 | 164 | 103 | 89  | 176 | 133 | 101 |
| Tnfrsf1a  | -0.31886 | 6.024267 | 4.523445 | 0.033433 |          | 1   | 103 | 109 | 153 | 193 | 124 | 70  | 106 | 105 | 108 | 75  |
| Zfp330    | -0.31712 | 4.558038 | 3.862178 | 0.049386 |          | 1   | 89  | 85  | 131 | 115 | 104 | 71  | 66  | 69  | 97  | 57  |
| Rgcc      | -0.31105 | 4.299362 | 4.199675 | 0.040432 |          | 1   | 137 | 172 | 268 | 237 | 166 | 170 | 152 | 137 | 124 | 91  |
| Chd1      | -0.30748 | 6.571161 | 5.017998 | 0.025085 |          | 1   | 267 | 149 | 249 | 283 | 159 | 139 | 159 | 148 | 180 | 134 |
| Bdh1      | -0.30487 | 4.878044 | 3.920537 | 0.0477   |          | 1   | 158 | 150 | 184 | 267 | 112 | 150 | 179 | 94  | 94  | 85  |
| Bmpr1a    | -0.30398 | 6.17452  | 6.052562 | 0.013886 |          | 1   | 315 | 294 | 388 | 348 | 209 | 238 | 262 | 196 | 197 | 188 |
| Mlst8     | -0.30169 | 4.760339 | 4.189481 | 0.040676 |          | 1   | 141 | 129 | 147 | 283 | 173 | 147 | 118 | 118 | 128 | 91  |
| Osbpl5    | -0.30056 | 6.219503 | 4.379661 | 0.03637  |          | 1   | 113 | 82  | 172 | 181 | 163 | 93  | 99  | 83  | 121 | 91  |
| Rit1      | -0.29828 | 6.775997 | 7.991919 | 0.004699 | 0.695008 | 550 | 528 | 642 | 669 | 456 | 441 | 444 | 430 | 369 | 313 |     |
| Tecpr2    | -0.29756 | 4.854345 | 4.482163 | 0.03425  |          | 1   | 198 | 146 | 220 | 313 | 194 | 157 | 141 | 152 | 170 | 118 |
| AU022252  | -0.2971  | 4.923209 | 4.878427 | 0.027194 |          | 1   | 205 | 168 | 233 | 314 | 229 | 182 | 178 | 177 | 163 | 103 |
| Rhog      | -0.29262 | 5.549142 | 3.912444 | 0.04793  |          | 1   | 96  | 93  | 183 | 147 | 120 | 59  | 113 | 90  | 106 | 74  |
| Creg1     | -0.28764 | 5.79039  | 6.255934 | 0.012378 | 0.9915   | 320 | 291 | 363 | 362 | 215 | 228 | 259 | 246 | 222 | 145 |     |
| Trmt6     | -0.28625 | 5.674018 | 3.859798 | 0.049456 |          | 1   | 245 | 140 | 235 | 270 | 152 | 128 | 155 | 134 | 131 | 169 |
| Inpp5k    | -0.28503 | 5.074753 | 4.64701  | 0.031108 |          | 1   | 186 | 178 | 286 | 279 | 204 | 148 | 191 | 204 | 127 | 122 |
| Ifnar2    | -0.28275 | 5.031999 | 6.34054  | 0.011801 | 0.9915   | 191 | 192 | 275 | 252 | 169 | 157 | 175 | 147 | 140 | 137 |     |
| Rpl6      | -0.28215 | 7.242734 | 5.934981 | 0.014843 |          | 1   | 354 | 289 | 505 | 430 | 288 | 316 | 247 | 244 | 286 | 210 |
| Hsd17b10  | -0.28115 | 6.081772 | 5.380829 | 0.020359 |          | 1   | 278 | 231 | 431 | 361 | 299 | 218 | 244 | 278 | 206 | 174 |
| Rcc2      | -0.27951 | 6.658067 | 5.355719 | 0.020654 |          | 1   | 435 | 347 | 712 | 652 | 472 | 357 | 486 | 322 | 378 | 282 |
| Smarcd2   | -0.27789 | 6.908431 | 5.108372 | 0.023811 |          | 1   | 165 | 173 | 231 | 241 | 161 | 175 | 127 | 119 | 168 | 97  |
| Grb14     | -0.27528 | 5.342203 | 5.127638 | 0.023548 |          | 1   | 268 | 326 | 486 | 438 | 365 | 222 | 315 | 274 | 277 | 237 |
| B3gat3    | -0.27461 | 5.810743 | 5.149033 | 0.023259 |          | 1   | 350 | 430 | 480 | 604 | 361 | 353 | 343 | 331 | 289 | 258 |
| Paqr5     | -0.27418 | 7.691805 | 5.103134 | 0.023883 |          | 1   | 163 | 99  | 195 | 205 | 117 | 114 | 109 | 137 | 101 | 84  |
| Cttnbp2nl | -0.27252 | 6.031162 | 4.651588 | 0.031025 |          | 1   | 199 | 170 | 295 | 249 | 150 | 157 | 131 | 179 | 157 | 121 |
| 2310022Bc | -0.26702 | 6.762892 | 7.771724 | 0.005307 | 0.725022 | 244 | 280 | 415 | 433 | 295 | 220 | 273 | 220 | 263 | 200 |     |
| Med28     | -0.25887 | 6.377433 | 6.291609 | 0.012131 | 0.9915   | 402 | 375 | 537 | 562 | 393 | 358 | 367 | 341 | 331 | 230 |     |

|          |          |          |          |          |         |      |      |      |      |      |      |      |      |      |      |
|----------|----------|----------|----------|----------|---------|------|------|------|------|------|------|------|------|------|------|
| Acbd6    | -0.25612 | 5.63852  | 4.814893 | 0.028215 | 1       | 218  | 189  | 354  | 315  | 222  | 166  | 191  | 226  | 182  | 153  |
| Cox14    | -0.25171 | 6.606255 | 4.990478 | 0.025487 | 1       | 442  | 477  | 605  | 781  | 526  | 464  | 409  | 344  | 444  | 359  |
| Uba52    | -0.24745 | 6.943722 | 4.060396 | 0.0439   | 1       | 279  | 225  | 489  | 538  | 236  | 274  | 230  | 249  | 267  | 209  |
| Gnptab   | -0.24744 | 5.728811 | 4.301115 | 0.038087 | 1       | 142  | 110  | 168  | 178  | 169  | 106  | 107  | 134  | 123  | 84   |
| Timm17b  | -0.24672 | 5.847968 | 4.327052 | 0.037511 | 1       | 202  | 145  | 236  | 274  | 197  | 182  | 163  | 156  | 146  | 111  |
| Imp3     | -0.24565 | 5.893009 | 3.845813 | 0.04987  | 1       | 283  | 203  | 337  | 431  | 231  | 243  | 214  | 213  | 233  | 156  |
| Dnttip2  | -0.24409 | 5.969424 | 4.891723 | 0.026986 | 1       | 241  | 209  | 302  | 336  | 244  | 223  | 207  | 187  | 211  | 136  |
| Crim1    | -0.23751 | 7.946938 | 4.674338 | 0.030617 | 1       | 143  | 141  | 218  | 243  | 144  | 114  | 148  | 132  | 130  | 114  |
| Dffa     | -0.23345 | 6.229015 | 4.46039  | 0.03469  | 1       | 551  | 447  | 689  | 759  | 547  | 525  | 452  | 371  | 438  | 378  |
| Etfb     | -0.2331  | 7.314694 | 4.513545 | 0.033627 | 1       | 641  | 653  | 928  | 1188 | 604  | 631  | 674  | 621  | 593  | 383  |
| Arl4c    | -0.23052 | 5.206006 | 3.912769 | 0.047921 | 1       | 249  | 199  | 276  | 354  | 241  | 192  | 235  | 187  | 173  | 171  |
| Knop1    | -0.21606 | 7.205628 | 3.886703 | 0.04867  | 1       | 464  | 382  | 604  | 679  | 369  | 350  | 413  | 471  | 329  | 263  |
| Dad1     | -0.2147  | 7.426766 | 5.752612 | 0.016464 | 1       | 843  | 696  | 1053 | 1156 | 716  | 694  | 720  | 616  | 687  | 552  |
| Nicn1    | -0.21367 | 6.454046 | 5.100619 | 0.023917 | 1       | 682  | 511  | 940  | 965  | 536  | 580  | 538  | 548  | 529  | 440  |
| Mllt3    | -0.20992 | 6.292735 | 4.090417 | 0.043127 | 1       | 461  | 330  | 433  | 538  | 389  | 298  | 364  | 296  | 356  | 282  |
| Ndufa11  | -0.2089  | 8.126606 | 6.503064 | 0.010769 | 0.95735 | 1584 | 1469 | 2320 | 2110 | 1414 | 1350 | 1526 | 1259 | 1331 | 1089 |
| Arhgap12 | -0.20606 | 6.28923  | 4.553365 | 0.032854 | 1       | 302  | 316  | 464  | 517  | 362  | 330  | 289  | 279  | 299  | 245  |
| Hip1r    | -0.20271 | 6.413314 | 3.866511 | 0.049259 | 1       | 249  | 239  | 330  | 393  | 290  | 231  | 225  | 244  | 237  | 176  |
| Chmp3    | -0.1999  | 7.944237 | 5.52783  | 0.018716 | 1       | 1115 | 1053 | 1439 | 1603 | 1110 | 1060 | 1103 | 972  | 913  | 681  |
| Tmcc3    | -0.19481 | 6.775217 | 4.109768 | 0.042636 | 1       | 367  | 334  | 524  | 508  | 375  | 313  | 361  | 285  | 355  | 257  |
| Abhd17b  | -0.19249 | 6.796327 | 4.207342 | 0.040249 | 1       | 597  | 491  | 770  | 744  | 476  | 554  | 516  | 407  | 464  | 359  |

**Table S6. Differentially expressed genes in the TG of miR-183C KO vs age- and sex-matched WT control mice.**

| Gene                     | log2FC   | logCPM   | LR       | PValue      | FDR         | WT1 | WT2 | WT3 | KO1 | KO2 | KO3 |
|--------------------------|----------|----------|----------|-------------|-------------|-----|-----|-----|-----|-----|-----|
| <b>Upregulated genes</b> |          |          |          |             |             |     |     |     |     |     |     |
| Gbp1                     | 7.869934 | 2.002584 | 16.04506 | 6.18527E-05 | 0.014309931 | 0   | 0   | 0   | 0   | 74  | 30  |
| Olfm12a                  | 6.787865 | -0.76982 | 9.407956 | 0.002160459 | 0.167813834 | 0   | 0   | 0   | 3   | 12  | 24  |
| Rnf180                   | 6.639192 | -0.96268 | 6.705907 | 0.009609406 | 0.389370954 | 0   | 0   | 0   | 8   | 14  | 10  |
| Col22a1                  | 6.414903 | -1.12469 | 5.712681 | 0.0168428   | 0.504721015 | 0   | 0   | 0   | 1   | 15  | 17  |
| 1700007K13Rik            | 6.293373 | 0.666839 | 15.7236  | 7.3304E-05  | 0.015931404 | 0   | 0   | 0   | 4   | 28  | 0   |
| Slc15a3                  | 6.158839 | -0.98298 | 4.060977 | 0.043885099 | 0.757810431 | 0   | 0   | 0   | 0   | 33  | 2   |
| Alox12b                  | 6.157591 | -0.48096 | 9.972233 | 0.001589187 | 0.143066707 | 0   | 0   | 0   | 1   | 12  | 14  |
| Kcng3                    | 6.09034  | -0.61679 | 10.05746 | 0.001517321 | 0.13833339  | 0   | 0   | 0   | 3   | 17  | 6   |
| Ctcf1                    | 5.983533 | -1.47484 | 5.052458 | 0.024591037 | 0.599028227 | 0   | 0   | 0   | 5   | 5   | 9   |
| Cacna1f                  | 5.893107 | -1.04329 | 4.508432 | 0.033728149 | 0.67948957  | 0   | 0   | 0   | 0   | 0   | 20  |
| Grem1                    | 5.884219 | -1.51615 | 4.842448 | 0.027767457 | 0.62298708  | 0   | 0   | 0   | 4   | 7   | 8   |
| Fam83a                   | 5.746201 | 7.100875 | 26.89558 | 2.1475E-07  | 0.00015933  | 0   | 0   | 0   | 0   | 20  | 0   |
| 9230116N13Rik            | 5.740471 | -0.1862  | 14.4685  | 0.000142523 | 0.025939835 | 0   | 0   | 0   | 2   | 9   | 8   |
| Fxyd4                    | 5.655839 | 2.86854  | 21.46584 | 3.60189E-06 | 0.0018902   | 0   | 0   | 0   | 3   | 7   | 7   |
| Gm5148                   | 5.606444 | 0.280327 | 11.14723 | 0.000841573 | 0.094418351 | 0   | 0   | 0   | 0   | 10  | 9   |
| Rd3                      | 5.5858   | -0.3944  | 8.522267 | 0.003508272 | 0.225999933 | 0   | 0   | 0   | 0   | 10  | 9   |
| Lrrc50                   | 5.569751 | -1.56481 | 4.193852 | 0.04057082  | 0.730176079 | 0   | 0   | 0   | 5   | 0   | 7   |
| 4933430I17Rik            | 5.510571 | -1.38852 | 5.228944 | 0.022214014 | 0.574915158 | 0   | 0   | 0   | 5   | 8   | 1   |
| Gm10474                  | 5.50804  | -1.18063 | 4.638119 | 0.031269255 | 0.660464347 | 0   | 0   | 0   | 0   | 18  | 3   |
| Oas2                     | 5.407161 | 1.374948 | 13.40368 | 0.000251131 | 0.039154624 | 0   | 0   | 0   | 1   | 14  | 2   |
| Gdf5                     | 5.394629 | -0.68259 | 6.285903 | 0.012170204 | 0.429066966 | 0   | 0   | 0   | 1   | 12  | 4   |
| 5830416P10Rik            | 5.247544 | 2.309126 | 16.48403 | 4.90616E-05 | 0.012720219 | 0   | 0   | 0   | 2   | 12  | 0   |
| Peg12                    | 5.244477 | -0.54079 | 8.942745 | 0.002785737 | 0.193396506 | 0   | 0   | 0   | 2   | 13  | 0   |
| Eppk1                    | 5.241131 | 5.81139  | 19.92733 | 8.04421E-06 | 0.003393711 | 0   | 0   | 0   | 0   | 7   | 6   |
| Psap1                    | 5.227975 | 6.324118 | 20.08282 | 7.416E-06   | 0.00332422  | 0   | 0   | 0   | 0   | 12  | 1   |
| Mia2                     | 5.139752 | -0.95323 | 5.04375  | 0.02471494  | 0.599616062 | 0   | 0   | 0   | 0   | 17  | 0   |
| Trp73                    | 5.101105 | 0.434255 | 11.00374 | 0.000909281 | 0.097477719 | 0   | 0   | 0   | 0   | 15  | 0   |
| Pde6h                    | 5.097348 | -1.2257  | 5.018128 | 0.025083268 | 0.602257311 | 0   | 0   | 0   | 6   | 0   | 1   |
| Cldn8                    | 5.096831 | -0.57166 | 4.660882 | 0.030857338 | 0.657352962 | 0   | 0   | 0   | 1   | 14  | 0   |
| Grap2                    | 5.060055 | 0.711122 | 12.31177 | 0.00045011  | 0.060176308 | 0   | 0   | 0   | 1   | 7   | 4   |
| Siglece                  | 5.059273 | -1.10611 | 5.512074 | 0.018885642 | 0.532733953 | 0   | 0   | 0   | 0   | 13  | 2   |
| Alox15                   | 5.059089 | -0.95485 | 5.014211 | 0.025140091 | 0.602257311 | 0   | 0   | 0   | 0   | 16  | 0   |
| Ltf                      | 5.049794 | 2.587274 | 14.65891 | 0.000128824 | 0.02431392  | 0   | 0   | 0   | 4   | 0   | 6   |
| Mapk15                   | 5.017104 | 0.30398  | 9.884317 | 0.001666934 | 0.146990757 | 0   | 0   | 0   | 1   | 0   | 9   |
| 5730559C18Rik            | 4.992312 | 4.208334 | 15.96325 | 6.45841E-05 | 0.014627289 | 0   | 0   | 0   | 8   | 0   | 2   |
| Leprel1                  | 4.980818 | 1.942102 | 14.45606 | 0.000143467 | 0.025939835 | 0   | 0   | 0   | 0   | 5   | 6   |
| Hrc                      | 4.934634 | -0.28968 | 5.844201 | 0.01562847  | 0.486272706 | 0   | 0   | 0   | 0   | 0   | 10  |
| Gm4013                   | 4.930064 | -1.26824 | 4.970342 | 0.025785555 | 0.60700438  | 0   | 0   | 0   | 0   | 0   | 10  |
| Rax                      | 4.923359 | -0.87053 | 4.737164 | 0.029517686 | 0.644774134 | 0   | 0   | 0   | 1   | 12  | 0   |
| Snx31                    | 4.916144 | 3.163254 | 14.31373 | 0.000154732 | 0.027066842 | 0   | 0   | 0   | 4   | 6   | 0   |
| Ccdc88c                  | 4.897153 | 0.612969 | 11.72676 | 0.000616079 | 0.074890147 | 0   | 0   | 0   | 2   | 5   | 3   |
| Catsper3                 | 4.883525 | -1.231   | 4.418381 | 0.035553758 | 0.694145031 | 0   | 0   | 0   | 0   | 1   | 9   |
| Gjb3                     | 4.850484 | 5.383095 | 15.27385 | 9.29952E-05 | 0.01869986  | 0   | 0   | 0   | 0   | 10  | 0   |
| Fgfr4                    | 4.840589 | -0.49446 | 7.235482 | 0.007147662 | 0.337332033 | 0   | 0   | 0   | 0   | 13  | 0   |
| Mxd3                     | 4.819973 | 1.00324  | 9.846312 | 0.001701726 | 0.148838744 | 0   | 0   | 0   | 0   | 12  | 0   |
| Irx2                     | 4.812347 | 0.27136  | 7.730967 | 0.005428166 | 0.289802085 | 0   | 0   | 0   | 6   | 0   | 0   |
| S100a7a                  | 4.773562 | 1.624529 | 11.22522 | 0.000806931 | 0.091862058 | 0   | 0   | 0   | 0   | 11  | 0   |
| Pdilt                    | 4.765891 | -0.88889 | 3.910059 | 0.047997914 | 0.789126837 | 0   | 0   | 0   | 0   | 13  | 0   |
| 4930420K17Rik            | 4.720241 | -1.29249 | 5.672537 | 0.017232515 | 0.511506439 | 0   | 0   | 0   | 1   | 7   | 2   |
| Slc25a43                 | 4.612011 | 0.963137 | 9.44526  | 0.002116955 | 0.167681269 | 0   | 0   | 0   | 0   | 10  | 0   |
| Rab25                    | 4.610079 | 7.428767 | 12.90581 | 0.000327563 | 0.04762064  | 0   | 0   | 0   | 8   | 0   | 0   |
| Mms22l                   | 4.550233 | 1.841769 | 9.333376 | 0.002250174 | 0.170474424 | 0   | 0   | 0   | 6   | 0   | 0   |
| Kynu                     | 4.53302  | 0.680336 | 8.734398 | 0.003122624 | 0.205053712 | 0   | 0   | 0   | 2   | 6   | 0   |
| 4833423E24Rik            | 4.510946 | -0.3455  | 6.019666 | 0.014147321 | 0.458424345 | 0   | 0   | 0   | 1   | 8   | 0   |
| 4833403I15Rik            | 4.499622 | -0.88453 | 5.574384 | 0.01822507  | 0.524940575 | 0   | 0   | 0   | 4   | 0   | 1   |
| Rab44                    | 4.477346 | 0.4093   | 7.099326 | 0.007711295 | 0.347310694 | 0   | 0   | 0   | 5   | 0   | 0   |
| Gm94                     | 4.470742 | -0.72371 | 5.394588 | 0.020199298 | 0.549441328 | 0   | 0   | 0   | 0   | 10  | 0   |
| Stx19                    | 4.45424  | 1.937262 | 9.527158 | 0.002024534 | 0.164999521 | 0   | 0   | 0   | 0   | 0   | 7   |
| Cldn7                    | 4.429101 | 7.77474  | 11.29261 | 0.000778162 | 0.089534456 | 0   | 0   | 0   | 7   | 0   | 0   |
| AU023871                 | 4.354059 | -0.51462 | 5.877334 | 0.015337025 | 0.481739326 | 0   | 0   | 0   | 1   | 0   | 5   |
| Nphs1                    | 4.318107 | 0.469835 | 7.867322 | 0.005033614 | 0.282590488 | 0   | 0   | 0   | 0   | 8   | 0   |

|               |          |          |          |             |             |     |    |    |     |     |      |
|---------------|----------|----------|----------|-------------|-------------|-----|----|----|-----|-----|------|
| 1700123I01Rik | 4.310131 | 0.411622 | 7.697457 | 0.005529869 | 0.289825134 | 0   | 0  | 0  | 0   | 8   | 0    |
| BC016579      | 4.248399 | 0.192587 | 6.299599 | 0.012076525 | 0.429066966 | 0   | 0  | 0  | 0   | 0   | 6    |
| Dnajb13       | 4.241507 | -0.49125 | 5.115528 | 0.023712649 | 0.587113195 | 0   | 0  | 0  | 0   | 0   | 6    |
| Hist1h1d      | 4.217035 | -0.17075 | 5.436502 | 0.019720123 | 0.543546322 | 0   | 0  | 0  | 4   | 0   | 0    |
| Vipr1         | 4.149509 | -0.91368 | 3.934796 | 0.047296889 | 0.787260109 | 0   | 0  | 0  | 0   | 8   | 0    |
| Wnt11         | 4.077359 | 2.321083 | 17.62186 | 2.69473E-05 | 0.00852643  | 0   | 1  | 0  | 4   | 4   | 10   |
| Dmrta2        | 4.032369 | 9.165108 | 22.53574 | 2.06271E-06 | 0.001167925 | 0   | 1  | 0  | 0   | 18  | 1    |
| Msx2          | 4.020093 | -0.4826  | 4.610319 | 0.031780119 | 0.665804326 | 0   | 0  | 0  | 0   | 7   | 0    |
| Ces2e         | 3.989374 | 1.481009 | 7.090615 | 0.007748867 | 0.348068118 | 0   | 0  | 0  | 0   | 0   | 5    |
| Cldn4         | 3.963418 | 7.532212 | 8.066055 | 0.004510222 | 0.260166043 | 0   | 0  | 0  | 5   | 0   | 0    |
| Ccdc89        | 3.9524   | -0.43387 | 4.933279 | 0.026344277 | 0.611068844 | 0   | 1  | 0  | 7   | 0   | 5    |
| Cd5           | 3.937935 | -0.6402  | 5.428758 | 0.019807759 | 0.544992009 | 0   | 0  | 0  | 0   | 1   | 4    |
| Ap1m2         | 3.918852 | 5.007197 | 7.863139 | 0.005045274 | 0.282590488 | 0   | 0  | 0  | 0   | 5   | 0    |
| Ccdc64b       | 3.918303 | 4.897028 | 7.857111 | 0.005062121 | 0.282590488 | 0   | 0  | 0  | 0   | 5   | 0    |
| Cdsn          | 3.850083 | 3.314134 | 6.399717 | 0.011413853 | 0.421959559 | 0   | 0  | 0  | 4   | 0   | 0    |
| Gdf15         | 3.824698 | -0.2093  | 5.272981 | 0.021658891 | 0.567615952 | 0   | 0  | 2  | 1   | 30  | 4    |
| Npm2          | 3.814393 | -0.40951 | 4.827114 | 0.028015492 | 0.625058265 | 2   | 0  | 0  | 3   | 14  | 13   |
| Sox15         | 3.750168 | 3.21234  | 6.443956 | 0.011133047 | 0.41872495  | 0   | 0  | 0  | 4   | 0   | 0    |
| Dpep2         | 3.698686 | -0.91778 | 3.920462 | 0.047701779 | 0.789126837 | 0   | 0  | 0  | 0   | 0   | 4    |
| Gpha2         | 3.650807 | 4.490986 | 31.03839 | 2.52975E-08 | 2.86474E-05 | 0   | 3  | 0  | 5   | 20  | 10   |
| Depdc1b       | 3.642944 | -0.74992 | 4.412259 | 0.035681558 | 0.694145031 | 0   | 0  | 0  | 0   | 5   | 0    |
| Pak6          | 3.631876 | 4.306533 | 6.287931 | 0.012156285 | 0.429066966 | 0   | 0  | 0  | 1   | 3   | 0    |
| Slc6a3        | 3.631575 | -0.41421 | 4.742756 | 0.029421895 | 0.643587562 | 0   | 0  | 0  | 0   | 1   | 3    |
| Tprg          | 3.615994 | 4.514326 | 6.252635 | 0.012400871 | 0.429657248 | 0   | 0  | 0  | 0   | 4   | 0    |
| Pyhin1        | 3.502774 | 3.381942 | 10.53801 | 0.001169441 | 0.116489268 | 0   | 0  | 1  | 5   | 0   | 6    |
| Cxcl2         | 3.46922  | 0.476634 | 4.851218 | 0.02762662  | 0.621772341 | 0   | 0  | 0  | 0   | 4   | 0    |
| D730005E14Rik | 3.467917 | -0.24806 | 4.127551 | 0.042190356 | 0.746732391 | 0   | 0  | 0  | 0   | 3   | 1    |
| Aknad1        | 3.459566 | 1.507698 | 4.805807 | 0.028363981 | 0.62785949  | 0   | 0  | 0  | 3   | 0   | 0    |
| Rbpjl         | 3.387994 | 0.356311 | 7.283505 | 0.006959061 | 0.330532334 | 1   | 0  | 0  | 2   | 2   | 7    |
| Six3          | 3.384735 | -0.63436 | 4.6967   | 0.030220586 | 0.655209118 | 0   | 0  | 1  | 2   | 0   | 8    |
| Z310002L13Rik | 3.317111 | 0.938009 | 4.11775  | 0.042435476 | 0.748631171 | 0   | 0  | 0  | 0   | 0   | 3    |
| Mylk3         | 3.303359 | -0.34767 | 4.585166 | 0.032249857 | 0.671071484 | 0   | 0  | 2  | 0   | 16  | 7    |
| Rspo4         | 3.270167 | 0.069861 | 7.742838 | 0.005392599 | 0.289603968 | 7   | 4  | 0  | 14  | 50  | 31   |
| Pttg1         | 3.261209 | 5.281364 | 13.48718 | 0.000240199 | 0.038282441 | 25  | 35 | 30 | 14  | 974 | 9    |
| Fgd1          | 3.258146 | 0.315937 | 6.731228 | 0.009473938 | 0.387530896 | 0   | 1  | 8  | 16  | 33  | 18   |
| Pde6a         | 3.216481 | -0.62002 | 4.027705 | 0.044758783 | 0.764309503 | 0   | 0  | 2  | 5   | 11  | 1    |
| 1700034H15Rik | 3.206482 | -0.27579 | 3.931118 | 0.047400411 | 0.787455204 | 0   | 2  | 4  | 10  | 39  | 1    |
| Bnpl          | 3.165585 | 6.266878 | 10.42218 | 0.001245109 | 0.122327719 | 0   | 0  | 1  | 4   | 6   | 0    |
| Fosb          | 3.093725 | 1.927958 | 8.490513 | 0.003570032 | 0.227837959 | 1   | 2  | 1  | 6   | 26  | 1    |
| Glra1         | 3.063131 | 0.302619 | 6.30883  | 0.012013811 | 0.429066966 | 1   | 2  | 14 | 39  | 26  | 24   |
| Sectm1b       | 2.934582 | -0.44825 | 4.123857 | 0.042282567 | 0.747536325 | 0   | 2  | 1  | 0   | 17  | 8    |
| Gh            | 2.916025 | 4.225626 | 35.93532 | 2.03977E-09 | 3.83129E-06 | 132 | 76 | 98 | 219 | 415 | 1187 |
| Mlf1ip        | 2.815949 | 1.198662 | 8.023622 | 0.004617115 | 0.263506244 | 1   | 0  | 5  | 4   | 30  | 7    |
| Manba         | 2.730368 | -0.25872 | 4.362008 | 0.036748967 | 0.700860741 | 3   | 1  | 2  | 6   | 21  | 9    |
| Gprc5a        | 2.639792 | 7.381306 | 9.757433 | 0.001785991 | 0.151577456 | 0   | 0  | 2  | 0   | 8   | 4    |
| Il1r2         | 2.620417 | 0.188422 | 4.369062 | 0.036597134 | 0.700170206 | 0   | 0  | 2  | 1   | 13  | 0    |
| A630055G03Rik | 2.605345 | 1.405272 | 11.87758 | 0.000568136 | 0.071485521 | 3   | 0  | 5  | 9   | 12  | 17   |
| Sh3bp2        | 2.535543 | 3.445032 | 27.12662 | 1.90556E-07 | 0.000151852 | 5   | 15 | 2  | 11  | 86  | 21   |
| A430110N23Rik | 2.534471 | 0.074413 | 5.049998 | 0.02462596  | 0.599028227 | 6   | 0  | 7  | 13  | 28  | 20   |
| 1700029I15Rik | 2.505629 | 0.256491 | 7.389469 | 0.006560685 | 0.31882955  | 4   | 4  | 7  | 22  | 37  | 5    |
| Pomc          | 2.46446  | 2.760494 | 35.84477 | 2.13681E-09 | 3.83129E-06 | 39  | 64 | 40 | 90  | 272 | 279  |
| Ovol2         | 2.455364 | 3.458312 | 12.31104 | 0.000450287 | 0.060176308 | 0   | 4  | 0  | 5   | 9   | 5    |
| Fetub         | 2.375815 | 2.061402 | 4.252123 | 0.039201296 | 0.718445555 | 0   | 0  | 1  | 0   | 6   | 0    |
| Mrgpra3       | 2.370023 | 2.367528 | 25.39332 | 4.67535E-07 | 0.000314359 | 37  | 28 | 50 | 69  | 288 | 154  |
| Bspry         | 2.366256 | 5.848952 | 9.47851  | 0.002078928 | 0.166903784 | 0   | 0  | 3  | 0   | 6   | 8    |
| Chek2         | 2.352683 | 3.280069 | 17.46105 | 2.93255E-05 | 0.009013831 | 8   | 0  | 1  | 6   | 28  | 7    |
| Gsta3         | 2.323216 | 5.651377 | 20.55924 | 5.78142E-06 | 0.00276429  | 0   | 0  | 9  | 15  | 15  | 6    |
| Rhbg          | 2.318832 | 3.794285 | 6.354809 | 0.011706354 | 0.427470411 | 0   | 2  | 0  | 0   | 10  | 0    |
| Areg          | 2.268666 | 2.016043 | 6.61554  | 0.01010927  | 0.400833293 | 0   | 3  | 0  | 4   | 9   | 0    |
| Tmprss2       | 2.267145 | 5.349268 | 6.212597 | 0.012684443 | 0.433666095 | 2   | 0  | 0  | 0   | 0   | 9    |
| Gm12216       | 2.262465 | 1.375637 | 10.63665 | 0.001108684 | 0.111992737 | 0   | 12 | 7  | 13  | 29  | 29   |
| Gdnf          | 2.237524 | 1.354751 | 6.364049 | 0.011645552 | 0.426858101 | 0   | 4  | 0  | 2   | 14  | 2    |
| Krt13         | 2.237026 | 9.540774 | 6.236823 | 0.012512075 | 0.431425957 | 1   | 1  | 0  | 0   | 9   | 0    |
| Sytl5         | 2.194201 | 1.222454 | 6.980174 | 0.008241758 | 0.360306545 | 0   | 0  | 6  | 4   | 15  | 5    |

|               |          |          |          |             |             |      |      |      |      |      |      |
|---------------|----------|----------|----------|-------------|-------------|------|------|------|------|------|------|
| Trp63         | 2.134504 | 5.399082 | 7.323745 | 0.006804945 | 0.326567584 | 0    | 3    | 0    | 0    | 9    | 3    |
| Chaf1b        | 2.134297 | 1.837015 | 9.875349 | 0.001675078 | 0.147106033 | 3    | 2    | 6    | 2    | 14   | 25   |
| Sox7          | 2.128715 | 2.282923 | 4.662757 | 0.030823665 | 0.657286399 | 0    | 0    | 2    | 0    | 9    | 0    |
| Ska1          | 2.115163 | 2.158094 | 4.90674  | 0.026752086 | 0.614298696 | 0    | 0    | 4    | 2    | 15   | 0    |
| Grhl2         | 2.025769 | 5.037748 | 20.13768 | 7.20629E-06 | 0.003298949 | 0    | 12   | 3    | 0    | 42   | 13   |
| Thap6         | 2.006841 | 1.676778 | 8.379014 | 0.003795784 | 0.236040708 | 6    | 2    | 6    | 7    | 14   | 24   |
| Ppl           | 2.003816 | 9.514417 | 20.584   | 5.70712E-06 | 0.00276429  | 0    | 10   | 2    | 9    | 25   | 6    |
| Pax6          | 2.002671 | 7.376403 | 15.96391 | 6.45615E-05 | 0.014627289 | 0    | 7    | 2    | 4    | 11   | 15   |
| Glis3         | 1.951815 | 0.916201 | 5.122874 | 0.023612486 | 0.586182792 | 4    | 4    | 6    | 19   | 10   | 5    |
| 4930594C11Rik | 1.937642 | 1.37232  | 5.014722 | 0.025132659 | 0.602257311 | 0    | 7    | 0    | 3    | 12   | 8    |
| N4bp2         | 1.934124 | 2.563831 | 10.30335 | 0.001327891 | 0.12641995  | 3    | 26   | 1    | 10   | 55   | 34   |
| Aspm          | 1.887861 | 4.460865 | 9.399465 | 0.002170487 | 0.167900698 | 7    | 2    | 0    | 4    | 27   | 0    |
| Prr15l        | 1.878842 | 1.854081 | 6.21414  | 0.012673388 | 0.433666095 | 2    | 11   | 7    | 1    | 18   | 43   |
| D2Ertd750e    | 1.832044 | 2.569697 | 4.877959 | 0.027201768 | 0.620371191 | 0    | 0    | 4    | 0    | 8    | 5    |
| Arsj          | 1.794172 | 1.814089 | 7.651246 | 0.005673313 | 0.294405785 | 4    | 5    | 5    | 4    | 18   | 19   |
| Egfl6         | 1.785481 | 2.272764 | 8.28047  | 0.004007375 | 0.2431336   | 16   | 8    | 2    | 14   | 31   | 28   |
| Tgm1          | 1.767923 | 2.181209 | 4.769112 | 0.028974765 | 0.637444832 | 2    | 2    | 2    | 5    | 0    | 10   |
| Mcm10         | 1.752039 | 2.108349 | 4.491675 | 0.034060293 | 0.683773541 | 7    | 0    | 1    | 9    | 11   | 1    |
| Nell1         | 1.745886 | 0.160218 | 3.910431 | 0.047987297 | 0.789126837 | 12   | 4    | 14   | 17   | 31   | 30   |
| Cd40          | 1.745401 | 2.121769 | 6.105317 | 0.013477574 | 0.446287344 | 0    | 9    | 0    | 3    | 15   | 8    |
| Dgkk          | 1.740272 | 2.509731 | 17.34675 | 3.1143E-05  | 0.00943765  | 61   | 39   | 80   | 79   | 245  | 171  |
| Stap2         | 1.732491 | 5.298796 | 8.07953  | 0.004476806 | 0.259630595 | 5    | 0    | 8    | 2    | 41   | 0    |
| Ascc2         | 1.723974 | 1.982671 | 4.816898 | 0.028182023 | 0.625442919 | 0    | 18   | 2    | 6    | 33   | 18   |
| Dlk1          | 1.723633 | 1.704297 | 9.298501 | 0.002293414 | 0.172057298 | 22   | 21   | 35   | 46   | 114  | 45   |
| Marveld2      | 1.713564 | 4.177134 | 10.63922 | 0.001107142 | 0.111992737 | 0    | 8    | 29   | 15   | 74   | 16   |
| Tstd1         | 1.702091 | 2.313583 | 13.24988 | 0.000272597 | 0.041597214 | 29   | 42   | 41   | 54   | 132  | 102  |
| Sh3tc1        | 1.686007 | 1.24804  | 5.237207 | 0.022108747 | 0.574915158 | 5    | 0    | 4    | 6    | 13   | 5    |
| Tspan1        | 1.673633 | 3.978733 | 4.647761 | 0.031094084 | 0.658484554 | 0    | 0    | 4    | 4    | 7    | 0    |
| Gldc          | 1.625157 | 3.610627 | 5.012281 | 0.025168127 | 0.602257311 | 2    | 1    | 10   | 14   | 13   | 1    |
| Tm9sf1        | 1.615774 | 2.074356 | 12.8576  | 0.000336111 | 0.047961082 | 17   | 29   | 16   | 29   | 87   | 40   |
| Upp1          | 1.612974 | 5.135118 | 21.98574 | 2.74684E-06 | 0.001477527 | 15   | 12   | 20   | 28   | 28   | 51   |
| Ascl2         | 1.600268 | 2.527787 | 7.388427 | 0.006564486 | 0.31882955  | 3    | 2    | 7    | 2    | 20   | 10   |
| Slc1a1        | 1.588348 | 5.941951 | 47.25489 | 6.23303E-12 | 2.6822E-08  | 68   | 54   | 71   | 57   | 321  | 134  |
| Rasgrf1       | 1.57694  | 5.639648 | 71.75226 | 2.43984E-17 | 2.62478E-13 | 128  | 151  | 128  | 223  | 483  | 244  |
| Serpinb5      | 1.576303 | 7.483989 | 11.82311 | 0.000585002 | 0.072756617 | 0    | 7    | 6    | 2    | 14   | 16   |
| Sh3rf2        | 1.567639 | 4.438681 | 16.82314 | 4.103E-05   | 0.011615802 | 7    | 9    | 11   | 8    | 49   | 12   |
| Gng4          | 1.563528 | 3.297082 | 26.28244 | 2.94958E-07 | 0.00020472  | 96   | 142  | 114  | 185  | 378  | 236  |
| Wnt10a        | 1.561609 | 4.269115 | 8.950655 | 0.002773701 | 0.193396506 | 13   | 0    | 0    | 6    | 15   | 11   |
| 2610018G03Rik | 1.559135 | 2.354186 | 4.909268 | 0.026712955 | 0.61417846  | 0    | 10   | 6    | 3    | 34   | 7    |
| D3Bwg0562e    | 1.541863 | 2.647607 | 17.65493 | 2.64827E-05 | 0.00852643  | 56   | 83   | 84   | 88   | 270  | 171  |
| Fanci         | 1.540336 | 1.294534 | 4.742081 | 0.029433452 | 0.643587562 | 8    | 8    | 8    | 17   | 8    | 22   |
| Shq1          | 1.522387 | 1.839002 | 6.867598 | 0.008777255 | 0.375450142 | 12   | 6    | 22   | 21   | 58   | 15   |
| Syce2         | 1.517985 | 1.964102 | 6.80728  | 0.009078693 | 0.380033386 | 0    | 11   | 8    | 8    | 19   | 16   |
| Chmp4c        | 1.487582 | 5.342557 | 5.835472 | 0.015706193 | 0.486937254 | 0    | 2    | 5    | 0    | 17   | 0    |
| Zfp750        | 1.482275 | 6.484439 | 7.208031 | 0.007257808 | 0.338321803 | 1    | 8    | 0    | 4    | 13   | 4    |
| Slc7a3        | 1.481856 | 2.072926 | 6.154802 | 0.013105581 | 0.440389035 | 5    | 11   | 39   | 31   | 63   | 22   |
| C1qtnf2       | 1.475483 | 2.69654  | 9.742238 | 0.001800815 | 0.151946448 | 12   | 16   | 40   | 23   | 109  | 32   |
| Zfp296        | 1.466733 | 3.21702  | 5.915654 | 0.015006929 | 0.476941025 | 0    | 4    | 9    | 7    | 21   | 2    |
| Zmynd17       | 1.459425 | 0.58266  | 4.545012 | 0.03301479  | 0.67459281  | 3    | 8    | 9    | 12   | 14   | 14   |
| Fam83b        | 1.434617 | 4.250718 | 3.857627 | 0.049520324 | 0.798973908 | 0    | 5    | 0    | 0    | 12   | 0    |
| Cpz           | 1.415583 | 2.513507 | 5.063814 | 0.024430413 | 0.597057701 | 9    | 0    | 15   | 16   | 12   | 17   |
| lsg20         | 1.409713 | 1.464862 | 4.930661 | 0.026384224 | 0.611068844 | 18   | 24   | 14   | 5    | 64   | 65   |
| Trpv4         | 1.403617 | 3.424873 | 9.888882 | 0.001662803 | 0.146990757 | 0    | 13   | 14   | 11   | 28   | 18   |
| Slc25a1       | 1.396849 | 7.409823 | 77.1076  | 1.61893E-18 | 3.48328E-14 | 1371 | 1550 | 1387 | 1637 | 4463 | 3049 |
| St6galnac1    | 1.393744 | 7.789976 | 9.93149  | 0.00162475  | 0.145054412 | 41   | 22   | 26   | 51   | 19   | 88   |
| Cbln1         | 1.391773 | 5.396292 | 15.74309 | 7.25525E-05 | 0.015931404 | 58   | 18   | 31   | 61   | 60   | 83   |
| Zdbf2         | 1.388932 | 2.411139 | 6.463384 | 0.011011972 | 0.418402432 | 80   | 45   | 74   | 90   | 146  | 158  |
| Idi1          | 1.386108 | 1.815518 | 5.049058 | 0.024639337 | 0.599028227 | 8    | 41   | 34   | 29   | 105  | 45   |
| Nox4          | 1.379541 | 1.504443 | 5.842953 | 0.015639557 | 0.486272706 | 8    | 8    | 4    | 3    | 22   | 20   |
| B4galnt1      | 1.373513 | 5.016262 | 44.8545  | 2.12232E-11 | 7.61065E-08 | 271  | 375  | 360  | 383  | 1042 | 665  |
| 1190003J15Rik | 1.372947 | 7.373791 | 7.196271 | 0.007305524 | 0.339493834 | 0    | 11   | 0    | 0    | 18   | 6    |
| Lgals7        | 1.365402 | 5.303457 | 24.65655 | 6.85115E-07 | 0.000446695 | 24   | 32   | 22   | 23   | 98   | 48   |
| Lpcat1        | 1.357983 | 1.107855 | 4.106354 | 0.042722376 | 0.750131423 | 16   | 32   | 19   | 46   | 51   | 20   |
| Arhgef5       | 1.354759 | 6.267621 | 22.72148 | 1.87263E-06 | 0.001088961 | 13   | 16   | 28   | 30   | 72   | 16   |

|               |          |          |          |             |             |      |      |      |     |      |      |
|---------------|----------|----------|----------|-------------|-------------|------|------|------|-----|------|------|
| Plk1          | 1.348508 | 4.543195 | 7.845042 | 0.005096027 | 0.283323327 | 7    | 8    | 14   | 11  | 47   | 6    |
| A830093I24Rik | 1.334414 | 1.721194 | 5.532509 | 0.018666324 | 0.530565321 | 23   | 24   | 11   | 37  | 42   | 25   |
| Grhl3         | 1.333447 | 3.2017   | 9.201203 | 0.002418562 | 0.1771011   | 25   | 10   | 6    | 19  | 27   | 34   |
| F2r1          | 1.331704 | 4.405547 | 7.524109 | 0.006087865 | 0.306759938 | 8    | 19   | 8    | 8   | 67   | 7    |
| Grb7          | 1.32687  | 7.158763 | 6.435505 | 0.011186137 | 0.41872495  | 6    | 5    | 0    | 3   | 13   | 7    |
| Arhgef15      | 1.319182 | 1.787736 | 7.164983 | 0.007434041 | 0.340386324 | 48   | 48   | 33   | 49  | 105  | 99   |
| Gp1bb         | 1.315928 | 3.521383 | 13.86172 | 0.000196766 | 0.033335593 | 24   | 54   | 77   | 46  | 192  | 87   |
| Klhl36        | 1.313121 | 2.121166 | 4.7094   | 0.029998126 | 0.652776571 | 9    | 30   | 4    | 16  | 47   | 24   |
| Nckap5        | 1.300734 | 1.259075 | 5.588325 | 0.018080581 | 0.522878739 | 14   | 14   | 23   | 19  | 57   | 27   |
| Prdm9         | 1.297951 | 2.513529 | 6.829656 | 0.008965654 | 0.378796703 | 6    | 5    | 20   | 9   | 29   | 24   |
| 1810010H24Rik | 1.290596 | 1.880685 | 9.380823 | 0.002192671 | 0.168124366 | 18   | 41   | 28   | 35  | 65   | 62   |
| BC060267      | 1.286002 | 1.039005 | 4.127069 | 0.042202388 | 0.746732391 | 14   | 16   | 30   | 18  | 85   | 25   |
| Slc16a12      | 1.268432 | 4.06834  | 14.36534 | 0.000150548 | 0.026770179 | 14   | 32   | 20   | 37  | 43   | 37   |
| Tcfap2a       | 1.266121 | 5.69682  | 19.77117 | 8.72894E-06 | 0.003611766 | 12   | 17   | 21   | 9   | 63   | 29   |
| Spag1         | 1.262068 | 1.527354 | 5.486976 | 0.019158657 | 0.533960698 | 14   | 12   | 17   | 23  | 41   | 15   |
| Smpdl3b       | 1.261178 | 3.125864 | 4.209738 | 0.04019255  | 0.729159283 | 12   | 15   | 2    | 1   | 55   | 14   |
| Nova1         | 1.243484 | 2.026995 | 6.163845 | 0.013038748 | 0.440389035 | 45   | 59   | 61   | 75  | 158  | 68   |
| Serpinc1      | 1.240495 | 1.607424 | 4.513364 | 0.033631041 | 0.67948957  | 3    | 25   | 18   | 13  | 54   | 24   |
| Rrm2          | 1.238654 | 3.364081 | 4.041442 | 0.044395864 | 0.761739563 | 6    | 2    | 1    | 2   | 10   | 6    |
| Hook2         | 1.22974  | 4.446116 | 8.967739 | 0.002747884 | 0.193396506 | 8    | 25   | 16   | 12  | 21   | 55   |
| Ybey          | 1.205687 | 2.229137 | 6.464705 | 0.011003794 | 0.418402432 | 24   | 31   | 23   | 27  | 95   | 30   |
| Ms4a6c        | 1.197252 | 2.029484 | 3.877347 | 0.048941826 | 0.793588094 | 8    | 54   | 55   | 38  | 75   | 88   |
| Sv2c          | 1.18594  | 5.891348 | 6.077751 | 0.013689492 | 0.44968413  | 393  | 1789 | 436  | 686 | 3201 | 1249 |
| Ccdc14        | 1.176649 | 1.829349 | 4.653245 | 0.030994893 | 0.658325037 | 24   | 15   | 19   | 12  | 33   | 61   |
| A030009H04Rik | 1.163646 | 3.402616 | 6.762101 | 0.009311409 | 0.384537952 | 79   | 217  | 110  | 120 | 318  | 281  |
| Sh3gl3        | 1.161143 | 2.76216  | 6.872555 | 0.008752941 | 0.375155914 | 89   | 106  | 86   | 114 | 284  | 103  |
| Zfp51         | 1.154742 | 2.365867 | 8.095654 | 0.004437153 | 0.258638786 | 20   | 25   | 18   | 22  | 64   | 29   |
| 2210020M01Rik | 1.15337  | 2.853937 | 8.295692 | 0.003973923 | 0.242906061 | 17   | 24   | 52   | 37  | 83   | 41   |
| Nova2         | 1.153359 | 2.975271 | 12.66628 | 0.000372309 | 0.052016864 | 82   | 108  | 147  | 102 | 346  | 172  |
| Nabl          | 1.151326 | 2.819688 | 9.003891 | 0.002694053 | 0.19130447  | 23   | 52   | 41   | 27  | 74   | 103  |
| Gm13157       | 1.148568 | 2.315489 | 6.217495 | 0.012649397 | 0.433666095 | 15   | 8    | 19   | 11  | 45   | 23   |
| Nup43         | 1.132675 | 2.139256 | 4.416247 | 0.035598248 | 0.694145031 | 21   | 10   | 32   | 9   | 91   | 30   |
| D19Ert652e    | 1.130802 | 3.063817 | 6.406683 | 0.011369158 | 0.421756554 | 21   | 12   | 42   | 14  | 61   | 62   |
| Ckap2l        | 1.128555 | 5.431048 | 6.276083 | 0.01223783  | 0.429066966 | 16   | 2    | 9    | 13  | 32   | 4    |
| Mtpp          | 1.121834 | 2.420429 | 4.55966  | 0.032733575 | 0.671717756 | 12   | 17   | 36   | 14  | 36   | 61   |
| Prim2         | 1.115945 | 1.472761 | 4.071247 | 0.043619063 | 0.755034398 | 8    | 10   | 14   | 6   | 31   | 22   |
| Ercc8         | 1.106331 | 2.132201 | 5.969105 | 0.014558667 | 0.468227611 | 26   | 26   | 33   | 14  | 100  | 50   |
| Rnf165        | 1.106058 | 2.151821 | 5.730296 | 0.016674676 | 0.501779481 | 38   | 80   | 76   | 69  | 156  | 98   |
| Sdcbp2        | 1.097761 | 4.920172 | 5.184899 | 0.022784001 | 0.579064072 | 1    | 14   | 6    | 7   | 5    | 22   |
| Cmtm7         | 1.090236 | 2.182267 | 5.771737 | 0.016285933 | 0.494228684 | 25   | 38   | 25   | 20  | 112  | 35   |
| Gpt           | 1.069439 | 4.954014 | 9.547567 | 0.002002147 | 0.164420552 | 39   | 22   | 7    | 28  | 51   | 34   |
| 1500011B03Rik | 1.066919 | 4.188761 | 3.896216 | 0.048394999 | 0.790161592 | 91   | 437  | 81   | 248 | 270  | 362  |
| Mthfd2l       | 1.064609 | 1.732477 | 4.890276 | 0.027008365 | 0.61820423  | 15   | 36   | 25   | 24  | 58   | 43   |
| Cacna2d2      | 1.062124 | 6.378794 | 17.71396 | 2.56735E-05 | 0.008498322 | 1202 | 678  | 1554 | 876 | 3798 | 1580 |
| Rgs19         | 1.058324 | 2.286571 | 4.519147 | 0.033517546 | 0.67948957  | 25   | 60   | 61   | 37  | 147  | 71   |
| Scin          | 1.057164 | 4.890441 | 6.191424 | 0.012837088 | 0.43565108  | 8    | 7    | 10   | 15  | 14   | 11   |
| Airn          | 1.048757 | 2.02078  | 5.383814 | 0.020324399 | 0.552146168 | 15   | 16   | 36   | 24  | 52   | 32   |
| Klhl8         | 1.048649 | 3.874682 | 10.76905 | 0.001032117 | 0.105246569 | 142  | 125  | 112  | 122 | 358  | 166  |
| Arhgef11      | 1.037635 | 2.153445 | 4.974168 | 0.025728572 | 0.606991182 | 15   | 55   | 59   | 44  | 69   | 81   |
| BC030867      | 1.032949 | 1.736238 | 4.774109 | 0.028890799 | 0.636248137 | 18   | 26   | 16   | 28  | 40   | 23   |
| Prdm8         | 1.028252 | 2.045593 | 6.772587 | 0.009256857 | 0.384537952 | 64   | 57   | 63   | 57  | 148  | 97   |
| Cog1          | 1.018708 | 2.406807 | 3.929026 | 0.04745942  | 0.787455204 | 22   | 47   | 93   | 37  | 149  | 87   |
| Lama3         | 1.017547 | 4.954276 | 6.748782 | 0.009381172 | 0.386676811 | 10   | 5    | 15   | 5   | 17   | 27   |
| Setd4         | 1.012559 | 1.966719 | 4.310691 | 0.037873569 | 0.707367806 | 17   | 16   | 39   | 25  | 61   | 29   |
| Papss2        | 1.01203  | 5.34925  | 15.52747 | 8.1315E-05  | 0.016833925 | 18   | 27   | 47   | 20  | 73   | 58   |
| Dak           | 1.00915  | 2.128999 | 5.251935 | 0.021922386 | 0.573125212 | 14   | 22   | 45   | 23  | 50   | 53   |
| Fam33a        | 1.00602  | 2.416106 | 5.554499 | 0.018433248 | 0.528108883 | 21   | 33   | 30   | 25  | 42   | 61   |
| Mpv17l        | 1.004846 | 2.306796 | 5.782517 | 0.016186342 | 0.493649021 | 55   | 72   | 67   | 76  | 94   | 110  |
| Pcca          | 0.990759 | 3.254677 | 11.57628 | 0.000667984 | 0.078537405 | 114  | 91   | 79   | 68  | 275  | 142  |
| Pxmp2         | 0.990127 | 2.552442 | 4.081994 | 0.043342476 | 0.752617461 | 32   | 76   | 89   | 61  | 134  | 105  |
| Rtp4          | 0.983428 | 3.728346 | 5.692732 | 0.017035317 | 0.509072051 | 42   | 38   | 90   | 34  | 161  | 93   |
| Nck2          | 0.972307 | 4.607676 | 14.63405 | 0.000130535 | 0.024422481 | 51   | 36   | 57   | 35  | 118  | 80   |
| Hnrnpul1      | 0.96636  | 2.773245 | 4.292946 | 0.038270805 | 0.710000942 | 7    | 38   | 50   | 19  | 66   | 64   |
| Plcg2         | 0.956826 | 3.435931 | 7.223225 | 0.007196629 | 0.338084448 | 37   | 17   | 35   | 19  | 58   | 64   |

|               |          |          |          |             |             |      |      |      |      |       |      |
|---------------|----------|----------|----------|-------------|-------------|------|------|------|------|-------|------|
| Rpl29         | 0.955265 | 5.285653 | 4.256455 | 0.039101439 | 0.717226397 | 75   | 152  | 89   | 68   | 88    | 300  |
| Tmem154       | 0.953468 | 5.94366  | 11.74883 | 0.000608815 | 0.074427622 | 7    | 36   | 36   | 18   | 53    | 51   |
| Mki67         | 0.950079 | 5.467182 | 6.262396 | 0.012332729 | 0.429066966 | 8    | 8    | 17   | 10   | 29    | 13   |
| Gbp3          | 0.947176 | 2.577935 | 4.99534  | 0.025415667 | 0.603252529 | 44   | 68   | 90   | 39   | 188   | 107  |
| Chst15        | 0.942045 | 5.487533 | 28.35296 | 1.01092E-07 | 8.36578E-05 | 284  | 291  | 276  | 183  | 752   | 456  |
| Irx3          | 0.924005 | 4.748533 | 5.041095 | 0.024752836 | 0.599616062 | 18   | 7    | 17   | 18   | 42    | 5    |
| Col4a5        | 0.921798 | 3.437077 | 6.387807 | 0.011490693 | 0.424071615 | 10   | 14   | 26   | 8    | 42    | 29   |
| Cx3cl1        | 0.920696 | 4.615334 | 11.76339 | 0.000604072 | 0.074269844 | 55   | 56   | 95   | 46   | 220   | 72   |
| Trim14        | 0.916737 | 3.877594 | 5.487065 | 0.019157679 | 0.533960698 | 32   | 9    | 44   | 20   | 92    | 28   |
| Cd109         | 0.915454 | 5.554388 | 5.181967 | 0.022822473 | 0.579064072 | 7    | 3    | 14   | 7    | 21    | 9    |
| AW555464      | 0.915274 | 7.422286 | 60.49041 | 7.39378E-15 | 5.30282E-11 | 1015 | 990  | 1207 | 853  | 2588  | 1522 |
| Mccc2         | 0.91336  | 2.411331 | 4.080746 | 0.043374496 | 0.752617461 | 37   | 35   | 28   | 22   | 43    | 82   |
| A930013F10Rik | 0.910628 | 4.489716 | 9.45483  | 0.002105939 | 0.167681269 | 87   | 70   | 145  | 91   | 253   | 115  |
| Lrch2         | 0.909468 | 2.984243 | 7.36243  | 0.006660071 | 0.32129615  | 85   | 41   | 76   | 62   | 144   | 97   |
| Rad18         | 0.901194 | 2.206533 | 3.893401 | 0.048476171 | 0.790161592 | 26   | 36   | 35   | 31   | 63    | 46   |
| Arhgef16      | 0.897089 | 4.448852 | 7.418933 | 0.006454107 | 0.317046935 | 19   | 26   | 15   | 13   | 66    | 17   |
| Pld2          | 0.885757 | 3.044488 | 6.977135 | 0.008255769 | 0.360306545 | 40   | 34   | 32   | 27   | 82    | 52   |
| Slc22a21      | 0.879361 | 3.077283 | 5.022639 | 0.02501801  | 0.602257311 | 25   | 45   | 16   | 22   | 87    | 26   |
| Rfc5          | 0.872001 | 4.242399 | 9.516959 | 0.002035816 | 0.165292923 | 26   | 51   | 56   | 41   | 66    | 77   |
| Miip          | 0.869587 | 2.33577  | 4.47623  | 0.034369456 | 0.686567536 | 31   | 42   | 30   | 32   | 95    | 28   |
| Tmem220       | 0.857757 | 2.495274 | 4.797228 | 0.028505571 | 0.630345175 | 20   | 51   | 55   | 31   | 88    | 63   |
| Myadm         | 0.852915 | 5.721288 | 20.00361 | 7.72959E-06 | 0.003393711 | 578  | 569  | 837  | 524  | 1740  | 716  |
| Ppm1f         | 0.852244 | 4.533228 | 10.8321  | 0.000997554 | 0.102886204 | 312  | 323  | 343  | 242  | 553   | 593  |
| Ints2         | 0.846277 | 3.894488 | 8.266691 | 0.004037903 | 0.2431336   | 57   | 88   | 123  | 68   | 199   | 121  |
| Tspo          | 0.84573  | 6.903923 | 37.29543 | 1.01522E-09 | 2.18436E-06 | 205  | 214  | 206  | 165  | 460   | 285  |
| Rpl10         | 0.845204 | 6.381129 | 18.18691 | 2.00251E-05 | 0.006732173 | 207  | 404  | 287  | 204  | 587   | 503  |
| Samd12        | 0.842632 | 2.607414 | 4.996243 | 0.025402401 | 0.603252529 | 40   | 88   | 52   | 44   | 128   | 88   |
| Glrx          | 0.842335 | 4.489313 | 9.009717 | 0.00268548  | 0.19130447  | 185  | 340  | 287  | 214  | 538   | 395  |
| Lrrc3         | 0.840543 | 3.09877  | 5.915694 | 0.015006591 | 0.476941025 | 169  | 90   | 106  | 112  | 206   | 189  |
| Chst10        | 0.839672 | 3.943192 | 7.32095  | 0.006815538 | 0.326567584 | 178  | 120  | 190  | 105  | 382   | 249  |
| Rgs8          | 0.837429 | 4.081861 | 13.73185 | 0.000210849 | 0.034552777 | 240  | 294  | 327  | 189  | 627   | 450  |
| Cartpt        | 0.834007 | 3.634704 | 5.496893 | 0.01905029  | 0.533051164 | 187  | 251  | 185  | 117  | 680   | 210  |
| Pde1c         | 0.831986 | 5.804368 | 29.21946 | 6.46267E-08 | 6.04569E-05 | 796  | 1028 | 1012 | 621  | 1983  | 1530 |
| Bmp3          | 0.830546 | 5.605117 | 10.0925  | 0.00148874  | 0.13833339  | 63   | 35   | 40   | 40   | 112   | 50   |
| Bcl11a        | 0.82422  | 2.906164 | 5.404027 | 0.020090343 | 0.549185963 | 37   | 41   | 46   | 24   | 134   | 37   |
| Rbmx2         | 0.82334  | 3.207649 | 5.141052 | 0.023366479 | 0.58316509  | 45   | 127  | 120  | 100  | 167   | 112  |
| Mvd           | 0.817871 | 6.461316 | 16.21399 | 5.65749E-05 | 0.013525172 | 809  | 713  | 636  | 645  | 1802  | 667  |
| Slc4a3        | 0.81632  | 4.861476 | 6.801911 | 0.009106037 | 0.380437865 | 366  | 450  | 551  | 335  | 850   | 721  |
| Lama5         | 0.808471 | 4.361399 | 4.420516 | 0.035509297 | 0.694145031 | 4    | 26   | 40   | 14   | 65    | 24   |
| Spon2         | 0.805934 | 5.542064 | 4.262309 | 0.038966915 | 0.71597962  | 14   | 6    | 19   | 4    | 17    | 34   |
| Mto1          | 0.795836 | 3.081852 | 4.320322 | 0.037659788 | 0.706159831 | 58   | 118  | 78   | 65   | 179   | 109  |
| Parp12        | 0.790932 | 4.650769 | 11.78175 | 0.000598142 | 0.073963368 | 69   | 70   | 63   | 44   | 166   | 83   |
| 1700017B05Rik | 0.78884  | 3.702103 | 6.283706 | 0.012185301 | 0.429066966 | 34   | 69   | 87   | 39   | 149   | 84   |
| Gng12         | 0.788021 | 6.892978 | 33.3683  | 7.62569E-09 | 1.17196E-05 | 454  | 394  | 443  | 361  | 920   | 510  |
| Reep6         | 0.785876 | 3.387856 | 5.680441 | 0.017155056 | 0.511230184 | 42   | 21   | 37   | 21   | 90    | 37   |
| Tcf19         | 0.78316  | 3.047722 | 5.019163 | 0.025068288 | 0.602257311 | 22   | 35   | 65   | 27   | 79    | 62   |
| BC064078      | 0.778716 | 5.35466  | 5.095249 | 0.023991467 | 0.59129486  | 20   | 6    | 14   | 9    | 27    | 20   |
| Npnt          | 0.776712 | 6.769446 | 9.772884 | 0.001771044 | 0.151577456 | 31   | 46   | 35   | 33   | 56    | 60   |
| Vat1          | 0.775364 | 6.271668 | 28.95221 | 7.41861E-08 | 6.65078E-05 | 536  | 685  | 627  | 550  | 1216  | 700  |
| Oasl1         | 0.773476 | 6.303554 | 5.495951 | 0.019060556 | 0.533051164 | 14   | 21   | 19   | 8    | 32    | 35   |
| Gm14446       | 0.771924 | 8.330843 | 4.954104 | 0.026028816 | 0.608734787 | 0    | 27   | 13   | 12   | 23    | 19   |
| Itrip         | 0.770743 | 2.873143 | 3.983176 | 0.045956845 | 0.778588573 | 18   | 20   | 28   | 24   | 27    | 32   |
| Zfyve26       | 0.76864  | 2.920812 | 4.43563  | 0.035196232 | 0.691683889 | 40   | 38   | 74   | 36   | 144   | 41   |
| N4bp2l1       | 0.764521 | 4.551424 | 6.279657 | 0.012213175 | 0.429066966 | 92   | 122  | 150  | 131  | 229   | 101  |
| Antxr2        | 0.764308 | 3.131643 | 4.394584 | 0.036053248 | 0.698343917 | 89   | 126  | 197  | 83   | 417   | 116  |
| Apobec1       | 0.753386 | 2.73689  | 4.301913 | 0.038069521 | 0.709286246 | 51   | 54   | 37   | 22   | 129   | 61   |
| 2610017109Rik | 0.750372 | 3.779177 | 3.851545 | 0.049700181 | 0.799812338 | 11   | 24   | 8    | 10   | 31    | 18   |
| Rbm3          | 0.75015  | 3.947261 | 9.573459 | 0.001974104 | 0.162738806 | 64   | 92   | 90   | 59   | 190   | 91   |
| Piga          | 0.748173 | 5.92343  | 8.907142 | 0.002840575 | 0.19402479  | 36   | 34   | 39   | 43   | 72    | 28   |
| Celf6         | 0.745519 | 4.249156 | 10.54927 | 0.001162343 | 0.116320796 | 268  | 344  | 393  | 198  | 757   | 459  |
| Nt5dc2        | 0.739714 | 3.066934 | 4.202431 | 0.040366076 | 0.730176079 | 29   | 29   | 26   | 33   | 41    | 30   |
| Gap43         | 0.739435 | 8.27836  | 16.68942 | 4.40259E-05 | 0.011990654 | 5378 | 6328 | 4584 | 4525 | 10675 | 6268 |
| Gdpd3         | 0.735224 | 4.932943 | 10.90118 | 0.000961029 | 0.100789978 | 91   | 131  | 101  | 66   | 268   | 121  |
| D730040F13Rik | 0.734284 | 3.22494  | 4.622915 | 0.031547583 | 0.662729393 | 51   | 69   | 97   | 28   | 167   | 117  |

|               |          |          |          |             |             |      |       |       |      |       |       |
|---------------|----------|----------|----------|-------------|-------------|------|-------|-------|------|-------|-------|
| Nptx2         | 0.731622 | 4.058258 | 9.488509 | 0.002067628 | 0.16661832  | 279  | 290   | 313   | 174  | 634   | 419   |
| Wnt4          | 0.72951  | 7.880735 | 19.53526 | 9.87597E-06 | 0.00386348  | 104  | 97    | 120   | 80   | 247   | 110   |
| Psen2         | 0.722344 | 6.510016 | 18.99416 | 1.31119E-05 | 0.004864062 | 1145 | 1457  | 1469  | 1037 | 2431  | 1799  |
| Irak4         | 0.722046 | 5.307032 | 7.996266 | 0.004687392 | 0.266809336 | 84   | 60    | 76    | 33   | 218   | 75    |
| Trp53bp2      | 0.721871 | 4.439118 | 4.783917 | 0.028726703 | 0.634582891 | 37   | 102   | 163   | 54   | 193   | 157   |
| Impact        | 0.72043  | 5.46848  | 20.28968 | 6.65587E-06 | 0.00311321  | 663  | 599   | 616   | 399  | 1293  | 873   |
| Acta2         | 0.714596 | 3.492481 | 4.338067 | 0.037269208 | 0.704024823 | 122  | 124   | 179   | 68   | 182   | 305   |
| Uhrf1bp1      | 0.713073 | 3.391685 | 6.199673 | 0.01277739  | 0.43499734  | 81   | 69    | 98    | 52   | 159   | 121   |
| Islr2         | 0.712547 | 3.953895 | 6.072701 | 0.013728686 | 0.450284156 | 284  | 273   | 268   | 228  | 620   | 249   |
| Mobkl2a       | 0.707911 | 4.186513 | 7.098264 | 0.007715863 | 0.347310694 | 215  | 185   | 221   | 154  | 443   | 232   |
| Rbp1          | 0.707285 | 6.960831 | 12.02597 | 0.000524644 | 0.067594282 | 283  | 356   | 326   | 298  | 642   | 283   |
| Ldlr          | 0.706982 | 8.620816 | 30.05182 | 4.20654E-08 | 4.30991E-05 | 1957 | 1891  | 2028  | 1420 | 4224  | 2223  |
| Star          | 0.706285 | 2.840877 | 4.373925 | 0.036492847 | 0.700170206 | 68   | 63    | 98    | 44   | 176   | 96    |
| Nradd         | 0.705719 | 3.668164 | 6.375391 | 0.011571358 | 0.42523009  | 64   | 84    | 76    | 68   | 151   | 68    |
| Stard4        | 0.700763 | 6.083544 | 13.40585 | 0.000250841 | 0.039154624 | 517  | 674   | 467   | 423  | 1211  | 561   |
| Fcer1g        | 0.699439 | 2.853699 | 4.508918 | 0.033718571 | 0.67948957  | 48   | 82    | 111   | 51   | 157   | 108   |
| Capn5         | 0.698931 | 7.599065 | 29.93501 | 4.46772E-08 | 4.36943E-05 | 971  | 1148  | 942   | 752  | 1863  | 1337  |
| Itga3         | 0.697675 | 6.558744 | 26.93471 | 2.10446E-07 | 0.00015933  | 322  | 438   | 396   | 254  | 751   | 515   |
| Ceacam1       | 0.696774 | 7.023366 | 5.868879 | 0.015410862 | 0.482847354 | 60   | 82    | 72    | 48   | 112   | 113   |
| Lgals3        | 0.693414 | 9.399402 | 11.12504 | 0.0008517   | 0.094418351 | 67   | 137   | 134   | 59   | 191   | 190   |
| Rasgef1b      | 0.692856 | 5.456988 | 12.03617 | 0.00052178  | 0.067594282 | 158  | 172   | 129   | 111  | 258   | 219   |
| Emid1         | 0.692436 | 3.425706 | 4.171303 | 0.04111417  | 0.735713998 | 205  | 167   | 198   | 123  | 492   | 181   |
| Hmgb2         | 0.69156  | 5.878642 | 5.090474 | 0.024057621 | 0.591685293 | 32   | 66    | 105   | 28   | 185   | 75    |
| A830080D01Rik | 0.689692 | 3.48076  | 6.539787 | 0.0105488   | 0.407482923 | 98   | 95    | 157   | 94   | 219   | 131   |
| Rpl15         | 0.687561 | 4.682677 | 7.231139 | 0.007164975 | 0.337333936 | 138  | 249   | 225   | 130  | 451   | 234   |
| Abhd13        | 0.683757 | 4.625025 | 8.705659 | 0.003172237 | 0.206829872 | 97   | 163   | 178   | 110  | 300   | 153   |
| Ina           | 0.680777 | 4.323007 | 9.428021 | 0.002136948 | 0.167681269 | 328  | 343   | 418   | 269  | 666   | 450   |
| Lxn           | 0.677944 | 7.210063 | 14.9119  | 0.00011265  | 0.021640841 | 1875 | 1871  | 1872  | 1034 | 3473  | 2948  |
| Hunk          | 0.675766 | 3.907793 | 5.482286 | 0.019210125 | 0.534240733 | 51   | 50    | 71    | 29   | 123   | 79    |
| Adcy6         | 0.673935 | 4.075444 | 4.324876 | 0.037559152 | 0.706159831 | 90   | 148   | 201   | 89   | 374   | 134   |
| Zfp236        | 0.669827 | 3.729347 | 5.304953 | 0.021264868 | 0.562082181 | 102  | 173   | 108   | 80   | 258   | 162   |
| Dennd4c       | 0.668021 | 3.323911 | 4.41444  | 0.035635965 | 0.694145031 | 37   | 26    | 62    | 27   | 83    | 52    |
| Tor3a         | 0.658175 | 4.833395 | 5.497886 | 0.019039472 | 0.533051164 | 33   | 50    | 75    | 46   | 74    | 68    |
| Hipk2         | 0.654776 | 3.418246 | 4.934193 | 0.026330359 | 0.611068844 | 43   | 65    | 72    | 27   | 145   | 72    |
| Tap1          | 0.654601 | 5.115469 | 5.33251  | 0.02093122  | 0.558476062 | 80   | 105   | 140   | 38   | 192   | 200   |
| Arf2          | 0.653501 | 5.591621 | 13.72179 | 0.00021198  | 0.034552777 | 275  | 277   | 304   | 187  | 484   | 406   |
| Ptplad2       | 0.652726 | 5.126143 | 8.920435 | 0.002819974 | 0.19402479  | 51   | 52    | 61    | 43   | 92    | 69    |
| Iah1          | 0.646335 | 3.102245 | 3.918194 | 0.047766168 | 0.789126837 | 59   | 63    | 41    | 31   | 110   | 72    |
| C530028O21Rik | 0.64604  | 3.554894 | 6.438925 | 0.011164622 | 0.41872495  | 164  | 185   | 221   | 130  | 387   | 210   |
| Nrn1l         | 0.643825 | 3.582528 | 4.995228 | 0.025417311 | 0.603252529 | 153  | 259   | 245   | 185  | 389   | 213   |
| Heca          | 0.641217 | 4.87073  | 5.442737 | 0.019649861 | 0.542873892 | 58   | 168   | 128   | 68   | 268   | 125   |
| Dgat2         | 0.640896 | 4.643502 | 7.703504 | 0.005511372 | 0.289825134 | 65   | 94    | 83    | 55   | 134   | 110   |
| Disp2         | 0.637441 | 4.98243  | 6.839254 | 0.008917607 | 0.378444265 | 568  | 626   | 557   | 304  | 955   | 972   |
| Ifitm1        | 0.630945 | 8.806115 | 6.928335 | 0.008484063 | 0.368030452 | 48   | 64    | 60    | 44   | 113   | 57    |
| Ptpn9         | 0.629268 | 4.129905 | 6.060572 | 0.013823292 | 0.452009043 | 118  | 210   | 234   | 115  | 347   | 239   |
| Cebpa         | 0.627827 | 4.667934 | 6.126747 | 0.013315162 | 0.442112709 | 81   | 87    | 43    | 36   | 145   | 94    |
| Coq10b        | 0.625451 | 4.390667 | 3.988085 | 0.045823129 | 0.777547661 | 59   | 88    | 102   | 78   | 139   | 72    |
| Insig2        | 0.624959 | 4.72272  | 8.05487  | 0.00453815  | 0.261077128 | 168  | 203   | 142   | 104  | 336   | 213   |
| Lrig3         | 0.624849 | 5.135306 | 6.666812 | 0.009822476 | 0.395028775 | 75   | 50    | 79    | 53   | 150   | 55    |
| Eif2ak2       | 0.619441 | 4.310079 | 5.549179 | 0.018489354 | 0.529011879 | 115  | 133   | 113   | 62   | 168   | 214   |
| Smpd4         | 0.618491 | 3.535677 | 4.867638 | 0.027364928 | 0.62042549  | 58   | 90    | 102   | 47   | 124   | 133   |
| Haus4         | 0.617161 | 3.100456 | 4.231214 | 0.039687046 | 0.723036818 | 82   | 100   | 55    | 55   | 154   | 87    |
| Mreg          | 0.61391  | 7.050158 | 13.26778 | 0.000270006 | 0.041496083 | 100  | 80    | 104   | 70   | 181   | 100   |
| Grik5         | 0.612043 | 3.564292 | 4.566054 | 0.032611598 | 0.671455635 | 111  | 162   | 197   | 98   | 255   | 216   |
| Rgs4          | 0.605578 | 9.120435 | 16.48628 | 4.90034E-05 | 0.012720219 | 8862 | 11112 | 11663 | 7292 | 17034 | 13369 |
| Mt2           | 0.601791 | 9.724791 | 8.264475 | 0.004042836 | 0.2431336   | 1714 | 1906  | 1852  | 1557 | 1833  | 2535  |
| Fnbp1l        | 0.600289 | 5.599456 | 8.341358 | 0.003875263 | 0.239881444 | 132  | 277   | 315   | 144  | 448   | 294   |
| Etaa1         | 0.598555 | 3.752855 | 6.143284 | 0.013191212 | 0.441083167 | 91   | 77    | 77    | 55   | 168   | 83    |
| AU019823      | 0.598002 | 4.842278 | 5.358783 | 0.020618163 | 0.553142638 | 119  | 147   | 158   | 148  | 201   | 114   |
| Braf          | 0.592707 | 6.992482 | 19.95016 | 7.94874E-06 | 0.003393711 | 957  | 1021  | 1165  | 612  | 1891  | 1374  |
| Tbc1d2b       | 0.591366 | 4.604367 | 6.442642 | 0.011141283 | 0.41872495  | 128  | 116   | 134   | 83   | 177   | 186   |
| Prdm12        | 0.590831 | 3.9743   | 5.40441  | 0.020085934 | 0.549185963 | 240  | 332   | 316   | 183  | 480   | 402   |
| Prrx1         | 0.588297 | 5.123936 | 7.291611 | 0.006927732 | 0.330503497 | 67   | 81    | 53    | 35   | 146   | 73    |
| Ifi35         | 0.587894 | 5.162609 | 8.922505 | 0.002816779 | 0.19402479  | 185  | 198   | 164   | 136  | 252   | 245   |



|               |          |          |          |             |             |      |      |      |      |       |      |
|---------------|----------|----------|----------|-------------|-------------|------|------|------|------|-------|------|
| Lypd2         | 0.587386 | 11.53472 | 4.869422 | 0.027336655 | 0.62042549  | 70   | 20   | 33   | 26   | 86    | 43   |
| Slc44a2       | 0.586228 | 6.632697 | 17.63151 | 2.68109E-05 | 0.00852643  | 719  | 921  | 884  | 480  | 1461  | 1142 |
| BC013529      | 0.584147 | 5.151577 | 6.195098 | 0.01281046  | 0.435434221 | 175  | 276  | 180  | 160  | 416   | 181  |
| Dcaf12l1      | 0.583513 | 4.187528 | 6.433658 | 0.011197774 | 0.41872495  | 174  | 226  | 300  | 125  | 457   | 289  |
| Aldh16a1      | 0.582408 | 3.640759 | 3.944867 | 0.047014571 | 0.785443766 | 72   | 72   | 66   | 40   | 164   | 65   |
| Nsdhl         | 0.582304 | 6.304792 | 14.95598 | 0.000110049 | 0.021331642 | 463  | 746  | 633  | 411  | 1138  | 665  |
| Acat2         | 0.581488 | 7.038832 | 12.13464 | 0.000494938 | 0.065331798 | 1635 | 1520 | 1231 | 933  | 2807  | 1676 |
| Thbs4         | 0.581111 | 5.984791 | 10.21255 | 0.001394882 | 0.131463717 | 98   | 123  | 104  | 87   | 161   | 129  |
| Ndn           | 0.580508 | 6.311546 | 13.55741 | 0.000231377 | 0.037151488 | 1042 | 1187 | 1186 | 711  | 1808  | 1547 |
| Zfp276        | 0.576468 | 3.488038 | 4.714152 | 0.029915313 | 0.652135632 | 137  | 120  | 117  | 75   | 220   | 161  |
| Zfp593        | 0.573013 | 5.548697 | 12.8303  | 0.000341051 | 0.047961082 | 201  | 208  | 206  | 107  | 378   | 272  |
| Slc19a1       | 0.571985 | 4.183882 | 4.482898 | 0.034235626 | 0.685222067 | 291  | 244  | 337  | 250  | 453   | 278  |
| Zfand2b       | 0.568225 | 4.725754 | 6.765968 | 0.009291251 | 0.384537952 | 241  | 243  | 254  | 167  | 363   | 326  |
| Wfdc2         | 0.566714 | 6.407327 | 7.574446 | 0.005920156 | 0.300294309 | 74   | 66   | 76   | 66   | 112   | 70   |
| Snx30         | 0.565772 | 4.493714 | 5.308735 | 0.021218756 | 0.5615532   | 198  | 214  | 149  | 157  | 265   | 206  |
| Prkce         | 0.563963 | 8.399661 | 15.08192 | 0.000102945 | 0.02013601  | 5837 | 6247 | 6501 | 4095 | 10769 | 7156 |
| Atp2b4        | 0.563277 | 5.475423 | 8.464495 | 0.003621459 | 0.229174424 | 560  | 597  | 589  | 418  | 967   | 646  |
| Fam83f        | 0.562072 | 4.505266 | 5.205079 | 0.02252099  | 0.578926676 | 54   | 94   | 101  | 56   | 155   | 84   |
| A3galt2       | 0.560257 | 4.257566 | 7.768299 | 0.005317109 | 0.287444516 | 328  | 390  | 370  | 217  | 683   | 418  |
| Rgs2          | 0.559    | 5.670061 | 8.894757 | 0.002859907 | 0.194727056 | 689  | 709  | 616  | 522  | 1051  | 718  |
| Tctex1d2      | 0.553494 | 3.736238 | 4.311346 | 0.037859005 | 0.707367806 | 96   | 75   | 104  | 42   | 155   | 138  |
| Nkap          | 0.549996 | 5.061553 | 7.924061 | 0.004878165 | 0.27505833  | 243  | 339  | 297  | 226  | 437   | 321  |
| Dlg3          | 0.549049 | 6.098737 | 12.4077  | 0.000427566 | 0.058224773 | 191  | 204  | 179  | 118  | 290   | 261  |
| Plxna3        | 0.542116 | 3.799569 | 3.983805 | 0.045939687 | 0.778588573 | 107  | 127  | 117  | 70   | 244   | 113  |
| Fam160a2      | 0.541779 | 5.270316 | 10.57514 | 0.001146185 | 0.115239833 | 300  | 309  | 380  | 193  | 641   | 357  |
| Plk2          | 0.541218 | 5.159019 | 6.630384 | 0.010025363 | 0.400833293 | 79   | 130  | 134  | 61   | 240   | 116  |
| Ppp3r1        | 0.53954  | 8.305003 | 15.3765  | 8.80768E-05 | 0.017877937 | 4522 | 4217 | 4458 | 3095 | 8443  | 4007 |
| Ehd2          | 0.53769  | 6.218568 | 8.029754 | 0.004601508 | 0.263313933 | 344  | 286  | 415  | 201  | 684   | 379  |
| Aim1          | 0.535639 | 7.221704 | 4.391213 | 0.036124595 | 0.698343917 | 10   | 37   | 31   | 13   | 51    | 28   |
| Ppil1         | 0.534115 | 4.971721 | 4.510382 | 0.033689711 | 0.67948957  | 186  | 180  | 125  | 110  | 369   | 121  |
| Ttc7          | 0.533823 | 5.589312 | 5.317461 | 0.021112747 | 0.560125598 | 36   | 43   | 61   | 17   | 87    | 64   |
| Sdad1         | 0.533688 | 5.099492 | 5.031834 | 0.024885532 | 0.600939511 | 316  | 305  | 384  | 205  | 751   | 277  |
| Rapgef5       | 0.53361  | 4.202876 | 4.523303 | 0.033436217 | 0.67948957  | 46   | 79   | 51   | 29   | 108   | 73   |
| Tmem97        | 0.533497 | 4.153354 | 4.572706 | 0.032485219 | 0.671233175 | 160  | 114  | 144  | 85   | 222   | 181  |
| Sertad4       | 0.533204 | 4.921386 | 7.317127 | 0.006830053 | 0.326567584 | 197  | 209  | 268  | 133  | 440   | 233  |
| Morf4l2       | 0.531502 | 4.720721 | 7.514057 | 0.006121933 | 0.30740795  | 206  | 339  | 261  | 161  | 475   | 307  |
| Ccdc50        | 0.529358 | 6.416571 | 16.15781 | 5.82778E-05 | 0.013779183 | 547  | 679  | 733  | 369  | 1300  | 685  |
| Cep250        | 0.529241 | 4.483382 | 5.541766 | 0.018567833 | 0.529766703 | 198  | 248  | 363  | 142  | 467   | 345  |
| Tmem18        | 0.527791 | 4.106239 | 4.392319 | 0.036101177 | 0.698343917 | 190  | 189  | 265  | 127  | 361   | 262  |
| Parp14        | 0.524994 | 5.361473 | 4.867854 | 0.0273615   | 0.62042549  | 202  | 191  | 199  | 104  | 430   | 197  |
| Rgneh         | 0.524551 | 4.849792 | 7.215276 | 0.00722857  | 0.338321803 | 185  | 269  | 259  | 127  | 485   | 248  |
| Syngr3        | 0.523221 | 5.67054  | 8.856519 | 0.002920441 | 0.196784986 | 1025 | 902  | 1033 | 565  | 1778  | 1171 |
| Smpd2         | 0.522508 | 3.786111 | 4.14679  | 0.041713526 | 0.745438726 | 97   | 89   | 136  | 56   | 224   | 111  |
| Plekhhm1      | 0.522327 | 4.67719  | 4.332695 | 0.037387005 | 0.704394754 | 83   | 110  | 113  | 43   | 233   | 106  |
| Cdv3          | 0.519501 | 5.583848 | 6.25823  | 0.012361763 | 0.429066966 | 175  | 306  | 233  | 136  | 299   | 360  |
| Eif2ak4       | 0.518236 | 4.86156  | 4.447983 | 0.034942494 | 0.689745603 | 104  | 146  | 185  | 64   | 323   | 151  |
| Garnl3        | 0.517338 | 4.859442 | 6.207901 | 0.012718131 | 0.433666095 | 425  | 625  | 551  | 343  | 884   | 594  |
| Fem1b         | 0.516904 | 6.293372 | 16.52762 | 4.79465E-05 | 0.012720219 | 801  | 1027 | 944  | 624  | 1566  | 962  |
| Kctd3         | 0.51593  | 4.010315 | 4.966705 | 0.025839827 | 0.607605717 | 181  | 210  | 193  | 148  | 252   | 231  |
| Tubb2c        | 0.515814 | 5.143055 | 5.277378 | 0.021604253 | 0.5675616   | 330  | 451  | 345  | 228  | 417   | 584  |
| Hsd17b7       | 0.515746 | 5.947553 | 6.735342 | 0.009452109 | 0.387374414 | 460  | 800  | 724  | 467  | 839   | 823  |
| 6330403K07Rik | 0.513637 | 4.517303 | 4.933496 | 0.02634097  | 0.611068844 | 344  | 460  | 541  | 303  | 668   | 517  |
| Synpr         | 0.507939 | 5.616    | 8.115899 | 0.004387871 | 0.256547383 | 813  | 1093 | 985  | 512  | 1592  | 1251 |
| Ppm1l         | 0.505502 | 7.504712 | 14.38567 | 0.000148931 | 0.026703391 | 2564 | 2840 | 2969 | 1654 | 4645  | 3309 |
| Tmem164       | 0.504872 | 4.7382   | 4.672968 | 0.030640932 | 0.657286399 | 190  | 246  | 165  | 118  | 344   | 232  |
| Wee1          | 0.50299  | 4.783695 | 4.41718  | 0.035578785 | 0.694145031 | 106  | 129  | 150  | 82   | 184   | 161  |
| Zbtb41        | 0.502707 | 4.540929 | 6.555101 | 0.01045839  | 0.406178199 | 244  | 230  | 238  | 115  | 461   | 279  |
| Arid3a        | 0.502472 | 4.987872 | 6.548365 | 0.010498058 | 0.406861212 | 129  | 121  | 159  | 62   | 284   | 148  |
| Gabra2        | 0.500746 | 4.623898 | 4.342561 | 0.037170962 | 0.704024823 | 364  | 635  | 458  | 318  | 638   | 621  |
| Rfesd         | 0.500631 | 4.154509 | 4.631728 | 0.031385931 | 0.661410083 | 231  | 244  | 186  | 116  | 467   | 218  |
| Fam89a        | 0.500551 | 6.104269 | 5.563898 | 0.018334545 | 0.526683661 | 1097 | 1231 | 784  | 548  | 1924  | 1229 |
| Ankrd27       | 0.499666 | 5.271027 | 8.091358 | 0.004447683 | 0.258638786 | 546  | 470  | 557  | 367  | 882   | 519  |
| Tmem110       | 0.499446 | 4.611354 | 5.180367 | 0.022843503 | 0.579064072 | 227  | 265  | 326  | 160  | 469   | 308  |
| Cacnb1        | 0.498243 | 5.494458 | 6.839445 | 0.008916654 | 0.378444265 | 853  | 928  | 794  | 546  | 1465  | 922  |

|               |          |          |          |             |             |       |       |       |       |        |       |
|---------------|----------|----------|----------|-------------|-------------|-------|-------|-------|-------|--------|-------|
| Alkbh6        | 0.497635 | 3.902784 | 4.379958 | 0.036363892 | 0.699939273 | 187   | 192   | 185   | 114   | 353    | 189   |
| Fdft1         | 0.496559 | 6.071619 | 11.20765 | 0.000814608 | 0.092247969 | 716   | 708   | 610   | 429   | 1065   | 799   |
| Mvk           | 0.495345 | 6.096584 | 10.81688 | 0.001005791 | 0.103050476 | 496   | 494   | 419   | 322   | 676    | 554   |
| Nbl1          | 0.4945   | 6.771288 | 7.012153 | 0.008095828 | 0.357857709 | 1718  | 2136  | 2177  | 1209  | 3376   | 2261  |
| Pgap1         | 0.492993 | 5.427387 | 5.632449 | 0.017630982 | 0.51579438  | 433   | 365   | 402   | 249   | 548    | 531   |
| Rasgrp1       | 0.492982 | 4.672594 | 5.145816 | 0.023302451 | 0.58316509  | 304   | 470   | 545   | 219   | 843    | 491   |
| Sidt2         | 0.489695 | 6.073105 | 6.319368 | 0.011942617 | 0.429066966 | 433   | 448   | 554   | 305   | 835    | 484   |
| Ttl           | 0.487297 | 7.719209 | 9.818738 | 0.001727428 | 0.149889878 | 4113  | 3822  | 3757  | 2171  | 7417   | 4167  |
| Adrm1         | 0.48679  | 4.888631 | 5.529437 | 0.018699123 | 0.530778802 | 311   | 393   | 353   | 191   | 457    | 520   |
| Ttyh3         | 0.485176 | 5.524366 | 5.189647 | 0.022721836 | 0.579064072 | 398   | 684   | 777   | 403   | 1160   | 530   |
| Arid5b        | 0.483206 | 6.443287 | 5.193056 | 0.022677312 | 0.579064072 | 258   | 497   | 427   | 191   | 501    | 612   |
| Lcmt1         | 0.482848 | 5.412539 | 10.2025  | 0.001402505 | 0.131463717 | 555   | 531   | 548   | 305   | 979    | 604   |
| Mal2          | 0.479958 | 9.481706 | 13.74928 | 0.000208901 | 0.034552777 | 747   | 1041  | 995   | 482   | 1649   | 1075  |
| Mpp7          | 0.478952 | 5.290964 | 4.339795 | 0.037231411 | 0.704024823 | 144   | 97    | 146   | 71    | 256    | 127   |
| Zfp451        | 0.477854 | 4.446581 | 6.151083 | 0.013133162 | 0.440389035 | 215   | 251   | 293   | 164   | 421    | 258   |
| 2510006D16Rik | 0.477632 | 6.150663 | 9.108827 | 0.00254379  | 0.183665054 | 791   | 629   | 674   | 387   | 1081   | 904   |
| Epb4.1l4a     | 0.475928 | 5.763259 | 6.617633 | 0.010097395 | 0.400833293 | 93    | 111   | 139   | 62    | 187    | 137   |
| Peg3          | 0.475482 | 6.020865 | 12.05353 | 0.000516943 | 0.067409359 | 854   | 1139  | 1342  | 669   | 1867   | 1187  |
| Fdps          | 0.474409 | 7.579094 | 13.38935 | 0.000253057 | 0.039171013 | 1133  | 996   | 1068  | 679   | 1832   | 1085  |
| Shc1          | 0.472262 | 5.380559 | 5.868157 | 0.015417184 | 0.482847354 | 430   | 518   | 642   | 304   | 1108   | 443   |
| Scamp4        | 0.469643 | 5.902107 | 9.913868 | 0.00164038  | 0.145844692 | 434   | 561   | 595   | 325   | 808    | 610   |
| Mtx1          | 0.468598 | 4.486698 | 4.571475 | 0.03250856  | 0.671233175 | 207   | 253   | 205   | 123   | 469    | 189   |
| Tppp          | 0.46753  | 5.447694 | 6.960352 | 0.008333563 | 0.362893783 | 274   | 281   | 258   | 192   | 373    | 304   |
| Tmem115       | 0.466758 | 4.707742 | 6.458    | 0.011045389 | 0.418402432 | 297   | 278   | 231   | 175   | 434    | 284   |
| Col8a1        | 0.465228 | 7.010475 | 9.169713 | 0.002460532 | 0.178854064 | 200   | 242   | 251   | 108   | 415    | 273   |
| Fasn          | 0.465098 | 7.750111 | 10.82867 | 0.000999406 | 0.102886204 | 2150  | 2016  | 2557  | 1315  | 4043   | 2272  |
| Tmsb10        | 0.46203  | 5.851843 | 8.766721 | 0.003067765 | 0.203524147 | 771   | 1039  | 848   | 482   | 1310   | 1144  |
| Orai1         | 0.460343 | 4.429466 | 4.11026  | 0.042623802 | 0.750131423 | 147   | 218   | 265   | 104   | 409    | 214   |
| Map3k3        | 0.456532 | 5.695212 | 6.088479 | 0.013606614 | 0.448330643 | 315   | 435   | 359   | 259   | 569    | 358   |
| Trpm3         | 0.455897 | 5.801185 | 6.131744 | 0.013277584 | 0.441546373 | 154   | 156   | 166   | 83    | 247    | 200   |
| Ebf3          | 0.451548 | 5.696989 | 5.684973 | 0.017110807 | 0.510618748 | 812   | 1110  | 1195  | 553   | 1879   | 1094  |
| Perp          | 0.449423 | 9.652162 | 4.315301 | 0.037771084 | 0.706680557 | 36    | 31    | 59    | 15    | 72     | 54    |
| Sema3c        | 0.449379 | 5.962112 | 7.922103 | 0.004883449 | 0.27505833  | 157   | 166   | 210   | 115   | 314    | 159   |
| Dhcr24        | 0.44876  | 8.933464 | 16.24191 | 5.57472E-05 | 0.013477045 | 2279  | 2272  | 2454  | 1439  | 4056   | 2270  |
| Mll1          | 0.447205 | 7.935543 | 9.297189 | 0.002295057 | 0.172057298 | 1947  | 1914  | 2790  | 1273  | 4086   | 2123  |
| Fscn1         | 0.44662  | 6.501193 | 8.726915 | 0.003135465 | 0.205053712 | 290   | 390   | 397   | 226   | 576    | 366   |
| Inpp5a        | 0.445516 | 5.800637 | 7.367059 | 0.00664295  | 0.321190376 | 426   | 489   | 387   | 237   | 845    | 408   |
| Nme3          | 0.445457 | 5.309873 | 7.64143  | 0.005704268 | 0.294405785 | 366   | 351   | 416   | 206   | 688    | 386   |
| Wtap          | 0.444869 | 4.741797 | 5.182656 | 0.02281343  | 0.579064072 | 171   | 182   | 248   | 108   | 287    | 258   |
| Gprasp2       | 0.442502 | 6.016149 | 9.793294 | 0.001751494 | 0.150740568 | 1238  | 1210  | 1339  | 788   | 1869   | 1412  |
| Stim1         | 0.442345 | 5.932416 | 9.149352 | 0.002488061 | 0.180246226 | 417   | 555   | 555   | 295   | 828    | 548   |
| Tmem161b      | 0.440905 | 4.659381 | 5.229479 | 0.022207181 | 0.574915158 | 210   | 236   | 208   | 127   | 390    | 212   |
| Spns2         | 0.438989 | 6.050798 | 3.914972 | 0.047857826 | 0.789126837 | 89    | 66    | 144   | 56    | 177    | 99    |
| Scfd1         | 0.437737 | 5.807091 | 5.039545 | 0.02477499  | 0.599616062 | 358   | 602   | 654   | 274   | 987    | 552   |
| Fxyd2         | 0.43711  | 8.071162 | 12.0921  | 0.00050636  | 0.066431919 | 5002  | 6029  | 5275  | 3115  | 8831   | 5938  |
| Klf5          | 0.434737 | 9.529157 | 13.43608 | 0.00024683  | 0.039050036 | 1112  | 1236  | 1301  | 729   | 2128   | 1160  |
| Nfkbia        | 0.434343 | 7.944246 | 5.885175 | 0.015268883 | 0.480505892 | 1723  | 2356  | 1917  | 1159  | 2883   | 2375  |
| P2ry2         | 0.432828 | 6.130418 | 8.047707 | 0.004556129 | 0.261412435 | 216   | 203   | 240   | 136   | 339    | 236   |
| Mrrf          | 0.431103 | 4.362397 | 4.2886   | 0.03836875  | 0.710449255 | 186   | 217   | 293   | 149   | 372    | 223   |
| Snx17         | 0.430124 | 5.787653 | 6.671142 | 0.00979864  | 0.395028775 | 591   | 639   | 534   | 332   | 888    | 694   |
| Mgp           | 0.430067 | 7.500802 | 5.337991 | 0.020865501 | 0.55838573  | 1264  | 1013  | 1279  | 704   | 1457   | 1570  |
| Rcn2          | 0.429542 | 4.581786 | 4.874996 | 0.027248503 | 0.620400836 | 221   | 245   | 241   | 133   | 414    | 235   |
| Zfp217        | 0.429164 | 5.794972 | 3.902348 | 0.04821866  | 0.789653935 | 69    | 72    | 64    | 25    | 150    | 63    |
| Esyt2         | 0.427901 | 4.976156 | 3.900856 | 0.048261523 | 0.789653935 | 206   | 223   | 312   | 157   | 422    | 221   |
| Mvp           | 0.425183 | 5.395294 | 5.246163 | 0.021995227 | 0.573635513 | 202   | 175   | 197   | 87    | 371    | 199   |
| Malat1        | 0.424892 | 13.01219 | 5.603173 | 0.017927984 | 0.520564769 | 40069 | 59401 | 73990 | 27448 | 104372 | 63098 |
| Pnpla8        | 0.423161 | 5.366795 | 5.790627 | 0.016111843 | 0.493649021 | 401   | 514   | 547   | 267   | 715    | 584   |
| Trim24        | 0.422922 | 5.036733 | 5.570989 | 0.018260443 | 0.52525626  | 229   | 292   | 298   | 136   | 399    | 351   |
| Gna11         | 0.420551 | 7.181071 | 14.11893 | 0.000171609 | 0.029538632 | 1512  | 1840  | 1632  | 1032  | 2480   | 1760  |
| Idh1          | 0.420446 | 6.645084 | 7.808026 | 0.005201468 | 0.285981922 | 793   | 1084  | 1151  | 620   | 1732   | 910   |
| Nmb           | 0.418033 | 6.641125 | 8.388781 | 0.003775439 | 0.236040708 | 2144  | 2052  | 1819  | 1100  | 3465   | 2095  |
| Ccdc41        | 0.41688  | 5.082138 | 4.566756 | 0.032598233 | 0.671455635 | 325   | 536   | 440   | 224   | 732    | 468   |
| Fam49b        | 0.415743 | 6.776803 | 10.89356 | 0.00096499  | 0.100789978 | 1190  | 1159  | 1202  | 726   | 2008   | 1108  |
| Itpr1p2       | 0.413557 | 5.295232 | 3.971974 | 0.046263504 | 0.779758933 | 314   | 399   | 516   | 208   | 805    | 368   |

|               |          |          |          |             |             |      |      |      |      |      |      |
|---------------|----------|----------|----------|-------------|-------------|------|------|------|------|------|------|
| Mdm4          | 0.411475 | 5.826873 | 9.200149 | 0.002419954 | 0.1771011   | 455  | 419  | 513  | 261  | 702  | 522  |
| Pcyt2         | 0.410218 | 5.256386 | 7.430712 | 0.006411997 | 0.316223999 | 494  | 452  | 448  | 262  | 760  | 491  |
| 1300010F03Rik | 0.409681 | 4.901455 | 5.761349 | 0.016382488 | 0.495595262 | 321  | 372  | 378  | 198  | 630  | 343  |
| Prkab1        | 0.409667 | 5.326665 | 4.329169 | 0.037464533 | 0.705237873 | 78   | 75   | 110  | 44   | 156  | 88   |
| Tspyl2        | 0.409084 | 4.206448 | 4.370602 | 0.036564062 | 0.700170206 | 274  | 298  | 359  | 168  | 454  | 369  |
| Sumo1         | 0.408595 | 4.965709 | 5.0571   | 0.024525244 | 0.598282495 | 216  | 225  | 227  | 99   | 391  | 255  |
| Dnpep         | 0.408164 | 6.210771 | 8.304263 | 0.003955212 | 0.242906061 | 627  | 760  | 677  | 349  | 1188 | 735  |
| Rps11         | 0.4062   | 6.44835  | 5.627498 | 0.017680853 | 0.516175359 | 450  | 566  | 453  | 250  | 683  | 631  |
| Bcl11b        | 0.405549 | 5.242268 | 4.960222 | 0.025936878 | 0.608079186 | 492  | 467  | 477  | 289  | 860  | 414  |
| Upf3a         | 0.405546 | 5.370459 | 5.888865 | 0.015236915 | 0.480505892 | 397  | 471  | 395  | 254  | 560  | 496  |
| Gga2          | 0.405224 | 6.172321 | 6.720529 | 0.009530933 | 0.38801464  | 887  | 899  | 943  | 522  | 1562 | 877  |
| Camk2a        | 0.402855 | 6.664108 | 7.769907 | 0.005312377 | 0.287444516 | 2091 | 2195 | 1908 | 1128 | 3687 | 2001 |
| Slc35a1       | 0.402776 | 6.195692 | 5.210815 | 0.022446816 | 0.578055343 | 183  | 273  | 208  | 143  | 340  | 211  |
| Wdr82         | 0.402073 | 4.693388 | 4.664914 | 0.030784957 | 0.657286399 | 273  | 282  | 306  | 140  | 454  | 341  |
| Acpp          | 0.40082  | 6.744303 | 8.299548 | 0.003965495 | 0.242906061 | 1057 | 1269 | 1388 | 601  | 1968 | 1461 |
| Zfhx2         | 0.400755 | 4.895059 | 5.0261   | 0.024968061 | 0.602256495 | 375  | 522  | 409  | 210  | 778  | 456  |
| Lass4         | 0.398405 | 5.936004 | 5.906349 | 0.015086408 | 0.477484096 | 953  | 1213 | 1404 | 571  | 1982 | 1342 |
| Qdpr          | 0.397739 | 6.950877 | 9.32066  | 0.002265843 | 0.171059249 | 1783 | 1826 | 1582 | 1141 | 2560 | 1671 |
| Wip1          | 0.397385 | 5.330862 | 4.318498 | 0.037700189 | 0.706159831 | 244  | 238  | 296  | 169  | 303  | 310  |
| Ltbp4         | 0.397221 | 4.658557 | 4.3725   | 0.03652336  | 0.700170206 | 127  | 156  | 152  | 92   | 225  | 139  |
| Pdlim2        | 0.393284 | 6.902944 | 4.501313 | 0.03386883  | 0.681685453 | 1099 | 1047 | 653  | 610  | 1294 | 979  |
| Rnf2          | 0.392717 | 4.81023  | 4.368103 | 0.036617737 | 0.700170206 | 152  | 181  | 223  | 116  | 288  | 176  |
| Ngfrap1       | 0.392285 | 6.142655 | 8.485866 | 0.003579161 | 0.227837959 | 1057 | 1368 | 1160 | 601  | 1800 | 1425 |
| Klf7          | 0.390481 | 6.316103 | 7.709835 | 0.005492077 | 0.289825134 | 1210 | 1645 | 1543 | 720  | 2197 | 1770 |
| Efna1         | 0.389646 | 4.7211   | 4.257535 | 0.039076587 | 0.717226397 | 147  | 193  | 215  | 110  | 303  | 172  |
| Prom1         | 0.388702 | 6.36666  | 4.456115 | 0.034776507 | 0.689632552 | 102  | 174  | 131  | 74   | 188  | 161  |
| Tubb2a        | 0.388405 | 7.929253 | 10.05971 | 0.001515471 | 0.13833339  | 4322 | 4663 | 4505 | 2477 | 6735 | 5019 |
| Atf3          | 0.388122 | 5.067191 | 5.624915 | 0.017706924 | 0.51623602  | 261  | 280  | 315  | 163  | 406  | 322  |
| Aldh1a1       | 0.387215 | 5.593699 | 4.24571  | 0.039349609 | 0.719937241 | 130  | 180  | 188  | 118  | 255  | 136  |
| Jdp2          | 0.385683 | 7.773613 | 7.608367 | 0.005809809 | 0.297475712 | 334  | 301  | 384  | 214  | 535  | 316  |
| Nup50         | 0.380866 | 6.447746 | 8.61032  | 0.003342636 | 0.216627007 | 643  | 773  | 694  | 417  | 930  | 805  |
| Pnn           | 0.377134 | 6.620801 | 6.619373 | 0.010087534 | 0.400833293 | 462  | 655  | 707  | 318  | 913  | 675  |
| Nme2          | 0.376016 | 7.289085 | 7.742691 | 0.005393036 | 0.289603968 | 1168 | 971  | 1027 | 638  | 1625 | 1040 |
| Plekha3       | 0.373721 | 4.766637 | 4.108664 | 0.042664062 | 0.750131423 | 419  | 376  | 381  | 211  | 611  | 422  |
| Klh26         | 0.370985 | 5.321454 | 6.595093 | 0.010226021 | 0.402023377 | 477  | 499  | 567  | 315  | 735  | 524  |
| Nptx1         | 0.3708   | 6.418344 | 7.377981 | 0.006602724 | 0.319964458 | 1621 | 1669 | 2029 | 1015 | 2640 | 1841 |
| Ralgds        | 0.36972  | 6.052    | 7.38858  | 0.006563927 | 0.31882955  | 774  | 749  | 887  | 445  | 1355 | 755  |
| Sc4mol        | 0.369278 | 7.934455 | 11.22734 | 0.000806012 | 0.091862058 | 2091 | 2366 | 2122 | 1245 | 3502 | 2143 |
| Maoa          | 0.367699 | 5.79891  | 5.509213 | 0.018916562 | 0.532733953 | 843  | 955  | 1010 | 517  | 1325 | 1045 |
| Coro2a        | 0.367369 | 6.127927 | 7.628864 | 0.005744148 | 0.295507569 | 554  | 706  | 711  | 379  | 931  | 702  |
| Rasgef1a      | 0.365492 | 6.019029 | 5.505434 | 0.018957479 | 0.533051164 | 1243 | 1424 | 1362 | 754  | 2302 | 1205 |
| 2700094K13Rik | 0.363296 | 4.91303  | 4.569903 | 0.032538399 | 0.671233175 | 225  | 324  | 265  | 137  | 428  | 289  |
| Aprt          | 0.358328 | 6.449095 | 8.123587 | 0.004369302 | 0.256256489 | 803  | 884  | 808  | 441  | 1311 | 859  |
| Zc3h7a        | 0.357832 | 5.665733 | 4.435378 | 0.035201425 | 0.691683889 | 209  | 258  | 230  | 149  | 300  | 244  |
| Pofut1        | 0.354536 | 5.347404 | 4.911161 | 0.026683696 | 0.61417846  | 309  | 265  | 302  | 162  | 485  | 272  |
| Dhcr7         | 0.353874 | 5.345207 | 4.669902 | 0.030695683 | 0.657286399 | 504  | 503  | 439  | 260  | 713  | 523  |
| Dtd1          | 0.351991 | 5.284141 | 4.128368 | 0.042170005 | 0.746732391 | 534  | 660  | 454  | 324  | 769  | 572  |
| Ppap2c        | 0.349615 | 7.04669  | 4.95973  | 0.02594426  | 0.608079186 | 264  | 260  | 204  | 135  | 412  | 217  |
| Tpm3          | 0.349511 | 7.888458 | 10.45454 | 0.001223483 | 0.120754397 | 852  | 920  | 1005 | 499  | 1380 | 974  |
| Acsl4         | 0.348461 | 5.492746 | 4.692401 | 0.030296287 | 0.655789647 | 475  | 710  | 529  | 278  | 936  | 588  |
| Osbpl5        | 0.34805  | 6.498765 | 5.90586  | 0.015090592 | 0.477484096 | 436  | 374  | 370  | 207  | 595  | 423  |
| Msn           | 0.343098 | 7.810328 | 4.884034 | 0.027106195 | 0.619784154 | 3876 | 4710 | 4630 | 2501 | 7350 | 3805 |
| Tmem50b       | 0.340845 | 6.813193 | 8.382242 | 0.003789046 | 0.236040708 | 935  | 1032 | 1049 | 515  | 1444 | 1125 |
| Tmem123       | 0.339557 | 7.868257 | 4.176231 | 0.040994774 | 0.734911734 | 324  | 525  | 509  | 291  | 629  | 409  |
| Slmo2         | 0.337721 | 5.572119 | 5.851835 | 0.015560814 | 0.485226759 | 399  | 501  | 503  | 235  | 753  | 466  |
| Ipo9          | 0.334672 | 4.991104 | 4.695652 | 0.030239015 | 0.655209118 | 354  | 404  | 425  | 197  | 607  | 414  |
| Rnh1          | 0.334425 | 7.434222 | 5.956616 | 0.014662156 | 0.470852158 | 608  | 602  | 525  | 313  | 783  | 653  |
| Zeb1          | 0.333922 | 6.30223  | 5.144402 | 0.023321445 | 0.58316509  | 1423 | 1320 | 1443 | 818  | 2156 | 1274 |
| Kpnb1         | 0.333184 | 6.463935 | 7.783143 | 0.005273597 | 0.286532113 | 896  | 995  | 1049 | 514  | 1580 | 940  |
| Eea1          | 0.333126 | 7.924761 | 8.421763 | 0.003707561 | 0.233935158 | 2954 | 2987 | 3526 | 1647 | 4514 | 3446 |
| Por           | 0.333106 | 7.406    | 8.909825 | 0.002836404 | 0.19402479  | 1006 | 1011 | 1082 | 569  | 1636 | 972  |
| Ldha          | 0.331388 | 7.704241 | 6.715239 | 0.00955925  | 0.38806947  | 1514 | 1684 | 1713 | 788  | 2256 | 1955 |
| Slc4a11       | 0.33133  | 7.393136 | 4.555307 | 0.032816872 | 0.671824758 | 180  | 181  | 169  | 116  | 274  | 143  |
| Atox1         | 0.330741 | 7.212764 | 6.352461 | 0.01172186  | 0.427470411 | 1033 | 1078 | 995  | 549  | 1583 | 1049 |

|               |          |          |          |             |             |       |       |       |      |       |       |
|---------------|----------|----------|----------|-------------|-------------|-------|-------|-------|------|-------|-------|
| Ids           | 0.330327 | 7.492118 | 4.60514  | 0.031876252 | 0.666204354 | 1972  | 2204  | 3022  | 1357 | 3375  | 2418  |
| Baz1b         | 0.329218 | 7.441917 | 7.164405 | 0.007436435 | 0.340386324 | 1138  | 1277  | 1370  | 653  | 1757  | 1404  |
| Lats2         | 0.328527 | 5.877307 | 5.675596 | 0.017202498 | 0.511506439 | 662   | 695   | 816   | 407  | 1041  | 729   |
| Ank3          | 0.327225 | 8.44714  | 3.945527 | 0.046996136 | 0.785443766 | 5504  | 5977  | 8201  | 3161 | 11214 | 6255  |
| Prkrir        | 0.322709 | 6.452957 | 3.901046 | 0.048256052 | 0.789653935 | 586   | 742   | 920   | 403  | 973   | 834   |
| Ppp2ca        | 0.321611 | 7.951161 | 5.808019 | 0.015953256 | 0.49237727  | 2159  | 2585  | 1930  | 1151 | 3259  | 2357  |
| Bod1l         | 0.320937 | 7.560445 | 5.592484 | 0.018037703 | 0.522878739 | 1811  | 2421  | 2642  | 1131 | 3034  | 2682  |
| Chd2          | 0.31914  | 6.865916 | 5.127431 | 0.02355056  | 0.58579636  | 735   | 948   | 1020  | 448  | 1458  | 867   |
| Ccdc55        | 0.318734 | 6.332639 | 4.908922 | 0.026718304 | 0.61417846  | 432   | 572   | 617   | 271  | 739   | 607   |
| Slc25a44      | 0.317568 | 5.623101 | 4.292451 | 0.038281939 | 0.710000942 | 499   | 564   | 670   | 302  | 877   | 571   |
| Rassf3        | 0.317044 | 6.346587 | 4.577211 | 0.032399905 | 0.671233175 | 734   | 881   | 815   | 395  | 1407  | 733   |
| Zdhhc20       | 0.316186 | 6.530315 | 4.778891 | 0.028810663 | 0.635720257 | 443   | 765   | 650   | 324  | 868   | 650   |
| Stambp        | 0.313791 | 5.608781 | 4.1032   | 0.042802132 | 0.750131423 | 436   | 467   | 502   | 264  | 704   | 436   |
| Erb2ip        | 0.312482 | 6.741608 | 3.873627 | 0.049050418 | 0.79470542  | 340   | 347   | 353   | 150  | 667   | 295   |
| Psmb10        | 0.30982  | 5.342534 | 3.961953 | 0.046539673 | 0.781569653 | 330   | 437   | 517   | 217  | 648   | 424   |
| Syne2         | 0.306547 | 7.703519 | 5.081759 | 0.024178834 | 0.592568192 | 443   | 549   | 568   | 226  | 916   | 488   |
| Hspb1         | 0.306438 | 9.011851 | 7.078767 | 0.007800269 | 0.348920119 | 1966  | 2169  | 2291  | 1093 | 3044  | 2275  |
| Syt1          | 0.306144 | 7.822994 | 6.085255 | 0.013631467 | 0.448462765 | 4123  | 5235  | 5128  | 2372 | 7061  | 5123  |
| Sun2          | 0.305206 | 6.49821  | 5.922558 | 0.014948238 | 0.476483392 | 595   | 652   | 766   | 378  | 884   | 697   |
| Coro7         | 0.304077 | 5.338742 | 4.334763 | 0.037341612 | 0.704156118 | 499   | 632   | 614   | 308  | 842   | 581   |
| Igsf8         | 0.303906 | 6.669161 | 4.059097 | 0.043933997 | 0.757971112 | 1275  | 1222  | 1446  | 767  | 2166  | 1025  |
| Nedd4l        | 0.303662 | 7.018708 | 4.09589  | 0.042987599 | 0.751185748 | 1869  | 2392  | 2831  | 1168 | 3568  | 2387  |
| Hook3         | 0.303036 | 7.741428 | 7.8146   | 0.005182581 | 0.285981922 | 1318  | 1514  | 1554  | 781  | 2146  | 1432  |
| Aebp1         | 0.301305 | 6.574608 | 4.490257 | 0.034088558 | 0.683773541 | 615   | 582   | 757   | 382  | 1027  | 532   |
| Shisa5        | 0.298041 | 7.082784 | 4.016772 | 0.04504987  | 0.767932125 | 1078  | 1099  | 937   | 560  | 1503  | 1029  |
| Rasa1         | 0.295957 | 7.559866 | 6.159298 | 0.013072307 | 0.440389035 | 2207  | 2075  | 1960  | 1158 | 3004  | 2002  |
| Usp45         | 0.294072 | 5.597373 | 4.297183 | 0.038175557 | 0.709313724 | 374   | 451   | 519   | 226  | 628   | 470   |
| Eef1g         | 0.293031 | 7.420041 | 4.894522 | 0.026942036 | 0.617682769 | 1397  | 1598  | 1320  | 697  | 1949  | 1629  |
| Med1          | 0.291794 | 6.551671 | 4.949256 | 0.026101902 | 0.609781232 | 682   | 986   | 999   | 478  | 1368  | 788   |
| A930001N09Rik | 0.291544 | 7.785255 | 6.153829 | 0.013112794 | 0.440389035 | 2742  | 3387  | 3198  | 1689 | 4408  | 3020  |
| Mycbp2        | 0.290177 | 8.554704 | 6.289141 | 0.012147993 | 0.429066966 | 2977  | 3831  | 4210  | 1785 | 5383  | 3780  |
| Azi2          | 0.287498 | 5.781469 | 4.103162 | 0.042803096 | 0.750131423 | 621   | 735   | 641   | 341  | 1006  | 639   |
| Mtss1         | 0.286413 | 6.618115 | 5.717211 | 0.016799393 | 0.504122385 | 903   | 984   | 1169  | 555  | 1468  | 962   |
| Tm9sf4        | 0.285409 | 6.35129  | 4.879116 | 0.027183534 | 0.620371191 | 703   | 693   | 827   | 358  | 1203  | 687   |
| Rps5          | 0.285156 | 10.06763 | 4.821149 | 0.028112601 | 0.625442919 | 3918  | 4140  | 3391  | 2021 | 5413  | 3823  |
| Dgkz          | 0.280357 | 7.66515  | 6.30294  | 0.012053788 | 0.429066966 | 3250  | 3706  | 3987  | 1791 | 5852  | 3347  |
| Rabgap1l      | 0.279552 | 6.329739 | 4.085185 | 0.043260721 | 0.752617461 | 1127  | 991   | 1256  | 551  | 1641  | 1155  |
| Sqle          | 0.279466 | 7.615036 | 5.631172 | 0.017643831 | 0.51579438  | 1404  | 1467  | 1504  | 700  | 2124  | 1519  |
| Nktr          | 0.277147 | 6.886695 | 4.239205 | 0.039500652 | 0.721473715 | 835   | 794   | 959   | 424  | 1433  | 755   |
| Tmx1          | 0.275901 | 6.923893 | 4.298718 | 0.038141114 | 0.709286269 | 1002  | 989   | 1196  | 619  | 1588  | 879   |
| Clptm1l       | 0.274337 | 6.154851 | 4.20501  | 0.040304739 | 0.730176079 | 582   | 598   | 732   | 321  | 967   | 599   |
| Osbpl3        | 0.2738   | 6.909211 | 4.558842 | 0.032749206 | 0.671717756 | 1956  | 2068  | 2002  | 1087 | 3172  | 1692  |
| Syncrip       | 0.272792 | 6.660751 | 4.385062 | 0.036255181 | 0.699611189 | 693   | 775   | 833   | 407  | 1003  | 795   |
| Raph1         | 0.272749 | 6.58075  | 4.924683 | 0.026475664 | 0.612059673 | 1224  | 1283  | 1472  | 704  | 1977  | 1209  |
| Tlk2          | 0.269023 | 6.396003 | 4.476112 | 0.034371829 | 0.686567536 | 916   | 954   | 965   | 506  | 1222  | 981   |
| Fam126b       | 0.265742 | 7.239384 | 6.304948 | 0.012040142 | 0.429066966 | 1958  | 2269  | 2178  | 1071 | 3217  | 2002  |
| Scaper        | 0.261662 | 6.90861  | 4.13388  | 0.042032877 | 0.746732391 | 1143  | 1298  | 1490  | 632  | 1810  | 1366  |
| Luc7l2        | 0.257701 | 7.428465 | 4.828982 | 0.027985158 | 0.625058265 | 1064  | 1361  | 1545  | 701  | 1939  | 1174  |
| Sgk1          | 0.251916 | 6.732169 | 4.405478 | 0.035823694 | 0.696280579 | 648   | 692   | 669   | 369  | 847   | 671   |
| Tmx4          | 0.251695 | 7.071111 | 4.990637 | 0.025484827 | 0.603252529 | 2286  | 2694  | 2717  | 1393 | 3674  | 2270  |
| Celf1         | 0.251387 | 6.906991 | 3.96158  | 0.04654999  | 0.781569653 | 1006  | 1044  | 1386  | 634  | 1613  | 1009  |
| Rpl31         | 0.251032 | 9.143012 | 3.859037 | 0.049478732 | 0.798973908 | 2580  | 2723  | 2335  | 1398 | 3660  | 2251  |
| Cd47          | 0.25076  | 6.562907 | 4.135509 | 0.041992432 | 0.746732391 | 1193  | 1446  | 1390  | 629  | 2008  | 1303  |
| Prkar2b       | 0.249004 | 7.867234 | 3.93619  | 0.047257697 | 0.787260109 | 4038  | 4523  | 4357  | 2358 | 6614  | 3472  |
| Rab12         | 0.248322 | 6.919959 | 4.27487  | 0.038679917 | 0.71294618  | 960   | 1157  | 1104  | 582  | 1583  | 916   |
| Rbm25         | 0.243703 | 8.72808  | 3.91128  | 0.047963062 | 0.789126837 | 2532  | 3194  | 3411  | 1516 | 4030  | 3092  |
| Sp1           | 0.241439 | 7.549953 | 3.945478 | 0.046997487 | 0.785443766 | 804   | 1052  | 1086  | 546  | 1421  | 808   |
| Stmn2         | 0.241221 | 9.576853 | 3.885028 | 0.048718451 | 0.791637017 | 15051 | 18468 | 16536 | 8109 | 22620 | 17013 |
| Mef2a         | 0.240004 | 6.951418 | 3.971388 | 0.046279613 | 0.779758933 | 1312  | 1604  | 1560  | 661  | 2241  | 1474  |
| Anapc5        | 0.238236 | 7.689294 | 4.574484 | 0.032451522 | 0.671233175 | 1931  | 1893  | 2134  | 1036 | 2969  | 1714  |
| Lrrc58        | 0.228445 | 7.276887 | 3.854001 | 0.049627463 | 0.799812338 | 1692  | 1998  | 2280  | 1050 | 2742  | 1788  |
| Ap3d1         | 0.227206 | 7.949509 | 3.88626  | 0.048682711 | 0.791637017 | 3148  | 3370  | 3489  | 1716 | 4454  | 3200  |
| Ahnak         | 0.224779 | 10.68296 | 4.336562 | 0.037302165 | 0.704029287 | 6395  | 7161  | 7321  | 3582 | 10393 | 5878  |
| Evi5          | 0.22438  | 7.682579 | 4.032652 | 0.044627724 | 0.763283076 | 1961  | 2464  | 2461  | 1094 | 3229  | 2208  |

**Downregulated genes**

|               |          |          |          |             |             |    |    |    |   |   |   |
|---------------|----------|----------|----------|-------------|-------------|----|----|----|---|---|---|
| Clec18a       | -7.2325  | -0.51637 | 10.83816 | 0.000994295 | 0.102886204 | 25 | 12 | 27 | 0 | 0 | 0 |
| Tomt          | -7.02269 | -0.66756 | 9.25967  | 0.002342552 | 0.173801188 | 23 | 19 | 13 | 0 | 0 | 0 |
| Ckap2         | -6.83462 | 2.47138  | 32.8811  | 9.7971E-09  | 1.4053E-05  | 14 | 28 | 7  | 0 | 0 | 0 |
| Cntnap5a      | -6.72368 | -0.84691 | 7.447097 | 0.006353883 | 0.315727846 | 8  | 33 | 5  | 0 | 0 | 0 |
| 4933437F05Rik | -6.53282 | -0.75322 | 10.97729 | 0.000922351 | 0.09824412  | 17 | 10 | 12 | 0 | 0 | 0 |
| Fbxo40        | -6.2541  | -1.15599 | 5.360172 | 0.02060174  | 0.553142638 | 14 | 14 | 4  | 0 | 0 | 0 |
| Phox2b        | -6.18374 | -1.18498 | 5.323532 | 0.021039321 | 0.559557518 | 10 | 6  | 15 | 0 | 0 | 0 |
| Pcdhga10      | -6.14382 | -0.39449 | 11.6273  | 0.000649907 | 0.077256336 | 11 | 3  | 16 | 0 | 0 | 0 |
| 4931417G12Rik | -6.09799 | -0.13629 | 11.00403 | 0.000909139 | 0.097477719 | 10 | 19 | 0  | 0 | 0 | 0 |
| Tnfrsf9       | -5.99465 | -0.61585 | 5.733293 | 0.016646244 | 0.501644289 | 10 | 1  | 16 | 0 | 0 | 0 |
| Snora23       | -5.96189 | -1.09238 | 6.027107 | 0.014087807 | 0.457184402 | 12 | 9  | 5  | 0 | 0 | 0 |
| Hist1h1b      | -5.89243 | 2.736771 | 19.44047 | 1.03784E-05 | 0.003987546 | 11 | 5  | 9  | 0 | 0 | 0 |
| Gmfg          | -5.84792 | -1.02107 | 6.008534 | 0.014236847 | 0.460631573 | 11 | 9  | 4  | 0 | 0 | 0 |
| Slc4a9        | -5.81263 | -0.00942 | 11.11632 | 0.000855716 | 0.094418351 | 7  | 0  | 17 | 0 | 0 | 0 |
| Bmp15         | -5.78485 | -0.19665 | 9.93808  | 0.001618943 | 0.145054412 | 11 | 0  | 12 | 0 | 0 | 0 |
| Rab19         | -5.77242 | 1.762345 | 16.6978  | 4.38318E-05 | 0.011990654 | 9  | 14 | 0  | 0 | 0 | 0 |
| 1700026J04Rik | -5.7644  | -0.96606 | 6.782597 | 0.009205086 | 0.383830697 | 8  | 4  | 11 | 0 | 0 | 0 |
| Zar1          | -5.73021 | -1.43584 | 4.268024 | 0.038836062 | 0.714796166 | 11 | 3  | 8  | 0 | 0 | 0 |
| Nos3          | -5.68839 | -1.11884 | 4.351805 | 0.036969734 | 0.70268622  | 6  | 6  | 10 | 0 | 0 | 0 |
| Fut1          | -5.68435 | 0.635808 | 15.3826  | 8.77931E-05 | 0.017877937 | 5  | 7  | 10 | 0 | 0 | 0 |
| Robo3         | -5.67412 | -1.44124 | 4.708983 | 0.030005393 | 0.652776571 | 4  | 12 | 6  | 0 | 0 | 0 |
| Apol11b       | -5.67396 | -1.44124 | 4.132389 | 0.042069921 | 0.746732391 | 4  | 12 | 6  | 0 | 0 | 0 |
| Lrrmp         | -5.59368 | -1.11254 | 3.974447 | 0.04619563  | 0.779758933 | 17 | 0  | 2  | 0 | 0 | 0 |
| Gm2518        | -5.43852 | -0.64222 | 6.210013 | 0.012702972 | 0.433666095 | 8  | 8  | 2  | 0 | 0 | 0 |
| Tnfsf8        | -5.41246 | -1.26945 | 4.199966 | 0.040424792 | 0.730176079 | 13 | 0  | 4  | 0 | 0 | 0 |
| Slc5a9        | -5.39074 | 0.293346 | 11.001   | 0.000910626 | 0.097477719 | 12 | 5  | 0  | 0 | 0 | 0 |
| Efha          | -5.3746  | -1.53426 | 3.904321 | 0.048162097 | 0.789653935 | 2  | 6  | 10 | 0 | 0 | 0 |
| Ppp1r14d      | -5.27628 | -0.79064 | 4.943675 | 0.026186308 | 0.610427523 | 0  | 9  | 8  | 0 | 0 | 0 |
| 4632434I11Rik | -5.27494 | 0.337996 | 7.739025 | 0.005403996 | 0.289603968 | 0  | 0  | 17 | 0 | 0 | 0 |
| D630029K05Rik | -5.26937 | -0.97927 | 4.537347 | 0.033162951 | 0.67576525  | 0  | 0  | 17 | 0 | 0 | 0 |
| S100a14       | -5.24302 | 8.893802 | 18.48298 | 1.71428E-05 | 0.006046643 | 0  | 8  | 8  | 0 | 0 | 0 |
| 5031410I06Rik | -5.18167 | -1.15476 | 4.365457 | 0.036674652 | 0.700170206 | 7  | 0  | 8  | 0 | 0 | 0 |
| Prss32        | -5.16652 | 5.61485  | 17.29039 | 3.20805E-05 | 0.009586715 | 15 | 0  | 0  | 0 | 0 | 0 |
| Clca5         | -5.07761 | 1.978302 | 13.10931 | 0.000293832 | 0.044145081 | 7  | 7  | 0  | 0 | 0 | 0 |
| Slc10a1       | -5.05608 | -0.96041 | 6.597559 | 0.01021187  | 0.402023377 | 4  | 5  | 5  | 0 | 0 | 0 |
| Pthlh         | -4.96823 | 3.255271 | 41.97606 | 9.23977E-11 | 2.84004E-07 | 8  | 41 | 45 | 0 | 0 | 2 |
| Arg1          | -4.95287 | 6.957004 | 15.08308 | 0.000102881 | 0.02013601  | 0  | 8  | 5  | 0 | 0 | 0 |
| Tlr1          | -4.94429 | -0.83886 | 7.404071 | 0.006507644 | 0.318292152 | 3  | 5  | 5  | 0 | 0 | 0 |
| Saa1          | -4.90932 | -0.39399 | 5.501255 | 0.019002834 | 0.533051164 | 0  | 13 | 0  | 0 | 0 | 0 |
| Ucn2          | -4.89822 | -0.03446 | 5.522446 | 0.018773988 | 0.530803048 | 0  | 0  | 13 | 0 | 0 | 0 |
| Rassf6        | -4.87983 | 1.650325 | 30.85517 | 2.78021E-08 | 2.99095E-05 | 14 | 18 | 18 | 1 | 0 | 0 |
| Scnn1a        | -4.82787 | 3.880018 | 12.61956 | 0.000381731 | 0.052989209 | 0  | 0  | 12 | 0 | 0 | 0 |
| Krt17         | -4.79593 | 0.834517 | 7.694299 | 0.005539552 | 0.289825134 | 0  | 0  | 12 | 0 | 0 | 0 |
| Hes7          | -4.78796 | -1.46705 | 4.471615 | 0.034462397 | 0.686567536 | 0  | 3  | 9  | 0 | 0 | 0 |
| 4930512B01Rik | -4.78743 | -0.00466 | 5.338518 | 0.020859205 | 0.55838573  | 0  | 0  | 12 | 0 | 0 | 0 |
| Rasl2-9-ps    | -4.78054 | -1.341   | 3.996443 | 0.0455964   | 0.774311083 | 7  | 3  | 1  | 0 | 0 | 0 |
| Hist1h2ab     | -4.70053 | -0.1463  | 4.964849 | 0.025867579 | 0.607605717 | 10 | 0  | 0  | 0 | 0 | 0 |
| Uchl4         | -4.68553 | 0.348539 | 8.339211 | 0.003879845 | 0.239881444 | 0  | 5  | 6  | 0 | 0 | 0 |
| Otx1          | -4.59031 | 7.186088 | 11.64178 | 0.000644867 | 0.077083157 | 2  | 8  | 0  | 0 | 0 | 0 |
| Krt23         | -4.58592 | 4.246525 | 11.11761 | 0.000855119 | 0.094418351 | 1  | 8  | 1  | 0 | 0 | 0 |
| Lrrc26        | -4.58213 | 3.974541 | 10.96551 | 0.000928232 | 0.0983834   | 0  | 10 | 0  | 0 | 0 | 0 |
| Lamb3         | -4.57945 | 3.764271 | 10.92249 | 0.000950036 | 0.100200869 | 0  | 0  | 10 | 0 | 0 | 0 |
| Pdyn          | -4.56542 | 3.702886 | 8.854391 | 0.002923846 | 0.196784986 | 0  | 10 | 0  | 0 | 0 | 0 |
| Dcaf12l2      | -4.55423 | 0.734242 | 6.815243 | 0.0090383   | 0.379813343 | 0  | 10 | 0  | 0 | 0 | 0 |
| Slnf3         | -4.54852 | -0.36641 | 5.367361 | 0.020516995 | 0.553142638 | 0  | 10 | 0  | 0 | 0 | 0 |
| Cryba1        | -4.54469 | -0.33584 | 4.08318  | 0.043312069 | 0.752617461 | 0  | 10 | 0  | 0 | 0 | 0 |
| 1110059M19Rik | -4.47024 | 0.571256 | 7.736722 | 0.005410894 | 0.289603968 | 5  | 0  | 4  | 0 | 0 | 0 |
| Cldn23        | -4.44176 | 5.280222 | 10.33438 | 0.001305749 | 0.124864452 | 0  | 8  | 1  | 0 | 0 | 0 |
| Erp27         | -4.43409 | 0.614209 | 7.570955 | 0.005931636 | 0.300294309 | 2  | 0  | 7  | 0 | 0 | 0 |
| Trim72        | -4.41421 | 1.236462 | 7.081059 | 0.007790296 | 0.348920119 | 0  | 9  | 0  | 0 | 0 | 0 |
| Gsta1         | -4.41265 | 1.058571 | 6.818117 | 0.009023767 | 0.379813343 | 0  | 9  | 0  | 0 | 0 | 0 |
| AB099516      | -4.40338 | -1.01831 | 3.980218 | 0.046037614 | 0.779343278 | 6  | 8  | 23 | 0 | 0 | 1 |
| Rdh18-ps      | -4.32095 | 2.404325 | 8.495631 | 0.003560004 | 0.227837959 | 8  | 0  | 0  | 0 | 0 | 0 |

|               |          |          |          |             |             |     |     |      |    |     |     |
|---------------|----------|----------|----------|-------------|-------------|-----|-----|------|----|-----|-----|
| Cngb3         | -4.24619 | 0.034584 | 5.219635 | 0.022333244 | 0.576857229 | 0   | 8   | 0    | 0  | 0   | 0   |
| Gm10639       | -4.24426 | -0.12984 | 4.836075 | 0.02787026  | 0.624609624 | 0   | 8   | 0    | 0  | 0   | 0   |
| Lpin3         | -4.18807 | 2.882001 | 18.81752 | 1.43839E-05 | 0.005245509 | 13  | 1   | 16   | 0  | 0   | 1   |
| Aim1l         | -4.10514 | 6.581407 | 8.215658 | 0.004153046 | 0.247526169 | 7   | 0   | 0    | 0  | 0   | 0   |
| Gsta2         | -4.09784 | 5.606193 | 8.073528 | 0.004491658 | 0.259791709 | 0   | 0   | 7    | 0  | 0   | 0   |
| Psg16         | -4.05738 | -0.22132 | 4.687803 | 0.030377469 | 0.656886043 | 0   | 1   | 6    | 0  | 0   | 0   |
| Notum         | -4.05662 | -0.75297 | 3.938291 | 0.047198713 | 0.78723063  | 0   | 4   | 3    | 0  | 0   | 0   |
| Slc39a4       | -4.03417 | 5.402814 | 23.12844 | 1.51533E-06 | 0.000931536 | 8   | 15  | 4    | 0  | 0   | 1   |
| Ces1d         | -3.89927 | 4.821815 | 6.614382 | 0.010115843 | 0.400833293 | 3   | 0   | 3    | 0  | 0   | 0   |
| Tmprss11e     | -3.89799 | 6.062929 | 7.02037  | 0.008058755 | 0.357509653 | 6   | 0   | 0    | 0  | 0   | 0   |
| Krt14         | -3.89012 | 8.382095 | 6.811792 | 0.009055784 | 0.379813343 | 1   | 0   | 5    | 0  | 0   | 0   |
| Cep55         | -3.86881 | 1.544963 | 5.79116  | 0.016106959 | 0.493649021 | 0   | 0   | 6    | 0  | 0   | 0   |
| Tmem102       | -3.86876 | 1.444383 | 5.787778 | 0.016137973 | 0.493649021 | 0   | 0   | 6    | 0  | 0   | 0   |
| Rasal1        | -3.854   | 0.078094 | 4.214198 | 0.040087018 | 0.728202461 | 0   | 3   | 3    | 0  | 0   | 0   |
| Lipc          | -3.84838 | -0.74471 | 4.377562 | 0.036415049 | 0.700170206 | 20  | 13  | 15   | 0  | 3   | 0   |
| Hpn           | -3.84398 | -0.85576 | 4.057911 | 0.043964861 | 0.757971112 | 21  | 16  | 5    | 0  | 0   | 2   |
| Qrfp          | -3.82926 | 0.102839 | 8.122889 | 0.004370986 | 0.256256489 | 12  | 1   | 24   | 0  | 2   | 0   |
| Cpne7         | -3.77601 | 3.969578 | 16.40949 | 5.1029E-05  | 0.012916603 | 14  | 0   | 8    | 0  | 1   | 0   |
| Krt6a         | -3.64862 | 12.23232 | 5.805822 | 0.015973198 | 0.49237727  | 1   | 2   | 2    | 0  | 0   | 0   |
| Lass3         | -3.6468  | 4.715577 | 5.811199 | 0.015924431 | 0.492284556 | 0   | 0   | 5    | 0  | 0   | 0   |
| Il1a          | -3.63806 | 2.693285 | 5.329034 | 0.020973006 | 0.558484148 | 0   | 5   | 0    | 0  | 0   | 0   |
| Tmem139       | -3.63362 | 1.796525 | 5.254501 | 0.021890072 | 0.572976638 | 0   | 0   | 5    | 0  | 0   | 0   |
| Gli2          | -3.62692 | 0.049831 | 4.995167 | 0.025418196 | 0.603252529 | 0   | 11  | 14   | 1  | 0   | 0   |
| C8g           | -3.61248 | 0.669942 | 18.3488  | 1.83934E-05 | 0.006282338 | 25  | 19  | 31   | 0  | 4   | 1   |
| Atg9b         | -3.58911 | 0.680598 | 10.0272  | 0.001542452 | 0.13985517  | 4   | 7   | 10   | 1  | 0   | 0   |
| Lpar2         | -3.50921 | 2.741631 | 8.852601 | 0.002926715 | 0.196784986 | 17  | 0   | 0    | 0  | 1   | 0   |
| Oas3          | -3.40305 | 1.998645 | 4.0623   | 0.043850743 | 0.757810431 | 4   | 0   | 0    | 0  | 0   | 0   |
| Fermt1        | -3.35503 | 6.918741 | 4.699933 | 0.030163787 | 0.654898134 | 0   | 0   | 4    | 0  | 0   | 0   |
| Ankk1         | -3.35359 | 4.731514 | 4.656667 | 0.03093318  | 0.65831681  | 0   | 0   | 4    | 0  | 0   | 0   |
| Capns2        | -3.35268 | 4.029696 | 4.602624 | 0.031923066 | 0.666204354 | 0   | 4   | 0    | 0  | 0   | 0   |
| Ptgs2         | -3.33768 | 0.851107 | 4.104533 | 0.04276839  | 0.750131423 | 0   | 0   | 4    | 0  | 0   | 0   |
| Spna1         | -3.25307 | 0.460763 | 5.632382 | 0.017631657 | 0.51579438  | 58  | 25  | 19   | 4  | 3   | 0   |
| Pde4c         | -3.23918 | -0.01231 | 4.32142  | 0.03763551  | 0.706159831 | 1   | 58  | 37   | 1  | 1   | 5   |
| Itgal         | -3.16692 | -0.33098 | 4.667456 | 0.030739432 | 0.657286399 | 24  | 22  | 15   | 0  | 0   | 5   |
| Mybl2         | -3.02456 | 0.81083  | 4.445487 | 0.03499361  | 0.690121455 | 0   | 0   | 14   | 0  | 0   | 1   |
| Xlr4c         | -3.00651 | 4.842235 | 9.214033 | 0.002401671 | 0.176966956 | 6   | 3   | 4    | 0  | 0   | 1   |
| Polh          | -2.9443  | 0.247035 | 6.666981 | 0.00982154  | 0.395028775 | 16  | 13  | 3    | 0  | 0   | 3   |
| Tmc8          | -2.83486 | -0.19973 | 4.39544  | 0.036035164 | 0.698343917 | 0   | 6   | 13   | 0  | 2   | 0   |
| Phldb3        | -2.82038 | 5.63657  | 21.12664 | 4.29909E-06 | 0.002151144 | 0   | 16  | 23   | 4  | 0   | 0   |
| Calb2         | -2.81125 | 4.339358 | 54.17817 | 1.8311E-13  | 9.84946E-10 | 597 | 890 | 1004 | 23 | 129 | 147 |
| Nnmt          | -2.748   | 1.078204 | 4.232828 | 0.039649328 | 0.723036818 | 7   | 0   | 3    | 0  | 1   | 0   |
| Ect2          | -2.73481 | 1.989406 | 7.649036 | 0.005680268 | 0.294405785 | 10  | 0   | 9    | 0  | 0   | 2   |
| Zfp57         | -2.71455 | -0.67477 | 4.467915 | 0.034537106 | 0.686784085 | 17  | 14  | 7    | 2  | 2   | 0   |
| Myo5b         | -2.71136 | 4.403476 | 11.13913 | 0.000845256 | 0.094418351 | 1   | 6   | 12   | 2  | 0   | 0   |
| Il12rb2       | -2.70289 | 0.031835 | 4.338481 | 0.037260161 | 0.704024823 | 14  | 31  | 4    | 0  | 2   | 4   |
| Snai2         | -2.6927  | 4.301351 | 26.70093 | 2.37507E-07 | 0.00017034  | 24  | 37  | 12   | 1  | 6   | 2   |
| Crygs         | -2.68665 | 0.669065 | 8.404027 | 0.003743906 | 0.235537692 | 49  | 22  | 22   | 2  | 11  | 0   |
| Tmprss13      | -2.62681 | 5.179094 | 6.342239 | 0.011789599 | 0.427765628 | 0   | 10  | 0    | 1  | 0   | 0   |
| Wnt7b         | -2.60309 | 6.582811 | 14.51798 | 0.000138828 | 0.025530122 | 5   | 7   | 13   | 3  | 0   | 0   |
| Mir351        | -2.58405 | 0.090784 | 4.067979 | 0.043703526 | 0.75588831  | 0   | 12  | 4    | 0  | 2   | 0   |
| Lrfn1         | -2.57542 | 0.384308 | 8.231533 | 0.004116875 | 0.24672577  | 44  | 13  | 32   | 1  | 8   | 4   |
| 1300002K09Rik | -2.51474 | 0.23075  | 4.273882 | 0.038702414 | 0.71294618  | 11  | 13  | 6    | 0  | 1   | 3   |
| Slc18a1       | -2.46424 | 0.862367 | 4.045413 | 0.044291539 | 0.761163536 | 13  | 35  | 0    | 4  | 1   | 0   |
| Ly6g6e        | -2.43747 | 1.988292 | 4.359248 | 0.036808544 | 0.700860741 | 2   | 0   | 7    | 1  | 0   | 0   |
| Neb           | -2.4365  | 2.020723 | 11.03663 | 0.000893292 | 0.097477719 | 118 | 117 | 170  | 5  | 34  | 26  |
| E130306D19Rik | -2.42231 | 1.870156 | 6.564966 | 0.010400574 | 0.405396304 | 0   | 9   | 7    | 1  | 0   | 1   |
| Clec4a3       | -2.39746 | 0.598046 | 7.133816 | 0.007564357 | 0.343364338 | 36  | 51  | 8    | 4  | 4   | 5   |
| Grxcr2        | -2.38978 | 1.542459 | 15.60071 | 7.82253E-05 | 0.016664322 | 84  | 116 | 109  | 7  | 13  | 25  |
| Rbp2          | -2.30647 | 5.941502 | 7.448177 | 0.006350075 | 0.315727846 | 0   | 7   | 7    | 0  | 1   | 1   |
| Chia          | -2.27416 | 0.031699 | 4.924145 | 0.026483898 | 0.612059673 | 40  | 24  | 25   | 2  | 3   | 9   |
| Cth           | -2.23048 | 1.951751 | 6.592641 | 0.010240114 | 0.402023377 | 11  | 6   | 3    | 2  | 0   | 1   |
| Tnfaip2       | -2.22064 | 3.655094 | 16.29552 | 5.4192E-05  | 0.013249948 | 13  | 21  | 26   | 8  | 0   | 1   |
| Prom2         | -2.20821 | 4.663022 | 6.402917 | 0.011393301 | 0.421924741 | 8   | 4   | 1    | 1  | 1   | 0   |
| Rpgrip1       | -2.19903 | 0.86124  | 6.259924 | 0.012349948 | 0.429066966 | 36  | 32  | 8    | 0  | 5   | 9   |

|               |          |          |          |             |             |     |     |     |    |    |    |
|---------------|----------|----------|----------|-------------|-------------|-----|-----|-----|----|----|----|
| Gxylt2        | -2.19892 | 0.714789 | 5.177914 | 0.022875775 | 0.579064072 | 12  | 9   | 9   | 4  | 0  | 0  |
| Plekhhg6      | -2.17571 | 5.108442 | 8.287825 | 0.003991177 | 0.2431336   | 12  | 5   | 1   | 0  | 3  | 0  |
| Enpep         | -2.16653 | 3.039849 | 15.52622 | 8.13687E-05 | 0.016833925 | 37  | 91  | 116 | 2  | 12 | 29 |
| Zbp1          | -2.1534  | 1.299594 | 6.376359 | 0.011565045 | 0.42523009  | 13  | 13  | 7   | 3  | 0  | 2  |
| Htr1a         | -2.13983 | 0.02779  | 4.51116  | 0.0336744   | 0.67948957  | 28  | 36  | 25  | 3  | 8  | 5  |
| Atp2c2        | -2.12771 | 2.567668 | 5.010638 | 0.025192024 | 0.602257311 | 2   | 0   | 11  | 2  | 0  | 0  |
| Susd1         | -2.12608 | 0.20637  | 4.416693 | 0.03558895  | 0.694145031 | 15  | 6   | 6   | 0  | 2  | 3  |
| E2f8          | -2.11661 | 2.38558  | 8.263303 | 0.004045447 | 0.2431336   | 4   | 8   | 18  | 1  | 0  | 4  |
| Frrs1         | -2.09809 | 3.531027 | 11.85327 | 0.000575601 | 0.072003678 | 8   | 10  | 17  | 5  | 1  | 0  |
| Sox21         | -2.09472 | 5.072397 | 15.54171 | 8.07046E-05 | 0.016833925 | 20  | 26  | 3   | 1  | 3  | 5  |
| Irx5          | -2.09124 | 4.081863 | 13.09902 | 0.00029545  | 0.044145081 | 15  | 22  | 8   | 1  | 0  | 7  |
| Esrp1         | -2.08994 | 7.076086 | 5.782118 | 0.016190024 | 0.493649021 | 0   | 9   | 3   | 0  | 0  | 2  |
| Dnd1          | -2.04812 | 1.579134 | 5.116539 | 0.023698832 | 0.587113195 | 30  | 57  | 41  | 12 | 1  | 4  |
| Chodl         | -2.04748 | 2.272293 | 18.53183 | 1.67091E-05 | 0.005991867 | 218 | 149 | 139 | 15 | 50 | 37 |
| Hpse          | -2.03765 | 2.903807 | 19.65394 | 9.28116E-06 | 0.003767802 | 63  | 62  | 55  | 12 | 20 | 2  |
| Cdh3          | -2.00744 | 0.827262 | 6.294416 | 0.012111891 | 0.429066966 | 13  | 12  | 15  | 2  | 0  | 5  |
| Melk          | -1.99837 | 3.191857 | 4.130417 | 0.042118967 | 0.746732391 | 11  | 0   | 0   | 0  | 0  | 2  |
| Dyrk2         | -1.99583 | 1.230121 | 3.889817 | 0.048579722 | 0.790651519 | 0   | 8   | 10  | 2  | 1  | 0  |
| B3gnt7        | -1.9836  | 3.629823 | 7.235081 | 0.007149257 | 0.337332033 | 10  | 12  | 0   | 4  | 0  | 0  |
| Dhx58         | -1.97978 | 2.011766 | 7.061022 | 0.007877905 | 0.351661839 | 37  | 9   | 20  | 3  | 0  | 9  |
| Ccdc69        | -1.97014 | 0.595232 | 4.860814 | 0.027473364 | 0.621574019 | 7   | 15  | 10  | 0  | 0  | 6  |
| Unc5a         | -1.94557 | 3.388159 | 13.79171 | 0.000204236 | 0.034330756 | 18  | 28  | 67  | 1  | 17 | 7  |
| Pcdhb19       | -1.94257 | 0.777468 | 6.269194 | 0.012285505 | 0.429066966 | 47  | 12  | 29  | 6  | 3  | 7  |
| Hrasls        | -1.92675 | 0.994163 | 6.726099 | 0.009501217 | 0.387909277 | 49  | 68  | 74  | 3  | 25 | 16 |
| 9530008L14Rik | -1.91861 | 6.500104 | 16.96499 | 3.80755E-05 | 0.011070699 | 5   | 33  | 16  | 0  | 0  | 11 |
| Grin2c        | -1.82749 | 0.159266 | 4.03624  | 0.044532946 | 0.763283076 | 25  | 37  | 30  | 6  | 9  | 4  |
| Xpnpep2       | -1.8223  | 0.804583 | 4.30166  | 0.038075182 | 0.709286246 | 20  | 3   | 18  | 4  | 2  | 2  |
| Fkbp11        | -1.80911 | 0.60613  | 5.660794 | 0.017348267 | 0.51243781  | 39  | 20  | 24  | 2  | 10 | 8  |
| AI467606      | -1.79243 | 1.334813 | 8.684415 | 0.003209426 | 0.208622386 | 17  | 20  | 16  | 2  | 5  | 5  |
| Rerg          | -1.78993 | 1.83936  | 4.621602 | 0.031571743 | 0.662729393 | 4   | 12  | 2   | 0  | 2  | 2  |
| Ccbe1         | -1.78911 | 2.046754 | 6.482281 | 0.010895505 | 0.417874669 | 14  | 20  | 19  | 6  | 0  | 4  |
| 2200002D01Rik | -1.789   | 7.97249  | 31.23615 | 2.28472E-08 | 2.731E-05   | 49  | 65  | 26  | 3  | 7  | 22 |
| Slc5a1        | -1.77695 | 6.597886 | 7.584937 | 0.005885803 | 0.300092245 | 7   | 5   | 10  | 0  | 5  | 0  |
| Hal           | -1.7706  | 2.246818 | 12.52824 | 0.000400847 | 0.05493388  | 28  | 51  | 32  | 3  | 6  | 16 |
| Spaca1        | -1.71106 | 1.85765  | 4.225113 | 0.039829959 | 0.725026572 | 22  | 16  | 0   | 0  | 5  | 5  |
| Nxph4         | -1.69815 | 3.286926 | 9.089185 | 0.002571255 | 0.185027139 | 18  | 8   | 18  | 7  | 3  | 0  |
| Fam83g        | -1.67398 | 6.543396 | 4.452855 | 0.034842941 | 0.689745603 | 0   | 11  | 2   | 3  | 0  | 0  |
| Fbp2          | -1.67392 | 1.029023 | 6.241976 | 0.012475719 | 0.430862859 | 56  | 80  | 28  | 7  | 18 | 16 |
| Gsto2         | -1.65525 | 1.693538 | 6.343894 | 0.011778605 | 0.427765628 | 29  | 41  | 52  | 12 | 5  | 8  |
| Naip1         | -1.64585 | 3.848699 | 6.827053 | 0.008978728 | 0.378796703 | 4   | 34  | 26  | 3  | 14 | 0  |
| Dbx2          | -1.60682 | 3.474678 | 6.097652 | 0.013536163 | 0.446693367 | 17  | 35  | 7   | 10 | 0  | 2  |
| BC048355      | -1.60225 | 2.563056 | 6.360049 | 0.01167183  | 0.42709371  | 31  | 26  | 4   | 0  | 7  | 10 |
| Fzd5          | -1.60182 | 3.864229 | 9.452815 | 0.002108253 | 0.167681269 | 34  | 36  | 16  | 7  | 0  | 13 |
| Cgn           | -1.58275 | 5.741932 | 16.05164 | 6.16381E-05 | 0.014309931 | 60  | 53  | 15  | 9  | 22 | 4  |
| Dennd2c       | -1.5663  | 4.259179 | 5.400289 | 0.020133412 | 0.549185963 | 9   | 0   | 10  | 1  | 4  | 0  |
| Tnfrsf22      | -1.5338  | 1.565694 | 4.077331 | 0.043462259 | 0.75353261  | 48  | 25  | 11  | 5  | 2  | 14 |
| Glb1l2        | -1.51506 | 3.616826 | 13.76351 | 0.000207324 | 0.034552777 | 146 | 179 | 225 | 38 | 40 | 59 |
| Akr1b3        | -1.5031  | 1.7201   | 4.651559 | 0.031025357 | 0.658325037 | 8   | 22  | 20  | 4  | 0  | 8  |
| Ppp2r5d       | -1.49579 | 1.783211 | 7.160825 | 0.00745129  | 0.340386324 | 34  | 95  | 53  | 12 | 12 | 22 |
| Aldh1a7       | -1.48672 | 2.409979 | 8.507245 | 0.003537353 | 0.227193065 | 31  | 18  | 39  | 8  | 6  | 9  |
| Sncaip        | -1.46821 | 1.4737   | 4.556862 | 0.032787098 | 0.671824758 | 80  | 48  | 27  | 6  | 14 | 25 |
| D14Erttd668e  | -1.46417 | 4.415692 | 11.00544 | 0.000908449 | 0.097477719 | 24  | 20  | 37  | 8  | 6  | 8  |
| Ptchd1        | -1.45687 | 2.613554 | 16.38737 | 5.1628E-05  | 0.012916603 | 116 | 80  | 107 | 15 | 44 | 31 |
| Kctd21        | -1.45681 | 1.977421 | 5.722944 | 0.016744634 | 0.503180932 | 35  | 77  | 64  | 6  | 9  | 33 |
| Haus7         | -1.45383 | 2.194809 | 6.299807 | 0.01207511  | 0.429066966 | 53  | 23  | 25  | 10 | 9  | 8  |
| Gm525         | -1.44934 | 0.986357 | 5.021631 | 0.025032583 | 0.602257311 | 23  | 66  | 24  | 6  | 21 | 7  |
| Cited4        | -1.43319 | 4.750014 | 9.812768 | 0.001733045 | 0.149889878 | 16  | 7   | 26  | 5  | 3  | 6  |
| Myh8          | -1.4262  | 1.769448 | 5.909211 | 0.015061915 | 0.477484096 | 89  | 82  | 147 | 12 | 76 | 19 |
| Ibsp          | -1.4245  | 2.590231 | 10.35438 | 0.001291676 | 0.124864452 | 115 | 282 | 200 | 30 | 98 | 53 |
| Adamts4       | -1.36713 | 1.318039 | 5.481536 | 0.019218364 | 0.534240733 | 85  | 76  | 63  | 12 | 42 | 19 |
| Efcab6        | -1.36696 | 4.288002 | 8.571668 | 0.003414342 | 0.22060957  | 11  | 19  | 15  | 0  | 7  | 7  |
| Nubpl         | -1.35585 | 1.641525 | 4.573526 | 0.032469672 | 0.671233175 | 10  | 23  | 41  | 3  | 11 | 9  |
| Cux2          | -1.35395 | 2.035977 | 9.024129 | 0.002664388 | 0.190455085 | 67  | 83  | 132 | 14 | 58 | 21 |
| Tlr5          | -1.32247 | 3.113751 | 7.152018 | 0.00748797  | 0.340724832 | 22  | 22  | 34  | 4  | 23 | 0  |

|               |          |          |          |             |             |      |      |      |     |      |      |
|---------------|----------|----------|----------|-------------|-------------|------|------|------|-----|------|------|
| Adcy7         | -1.31974 | 2.633515 | 9.715257 | 0.001827445 | 0.151985985 | 76   | 83   | 43   | 9   | 21   | 34   |
| Cdkl4         | -1.30561 | 2.272876 | 4.015719 | 0.045078001 | 0.767932125 | 126  | 158  | 169  | 4   | 99   | 69   |
| Agphd1        | -1.30318 | 1.19967  | 4.680551 | 0.030505967 | 0.657228793 | 43   | 50   | 37   | 6   | 20   | 17   |
| Lmtk2         | -1.30043 | 1.889707 | 5.27527  | 0.021630438 | 0.5675616   | 53   | 45   | 56   | 7   | 23   | 21   |
| Hs3st3b1      | -1.3     | 3.539048 | 7.039227 | 0.007974343 | 0.3544958   | 12   | 45   | 18   | 8   | 5    | 9    |
| Btc           | -1.2954  | 4.908545 | 12.59993 | 0.000385762 | 0.053205433 | 35   | 15   | 49   | 12  | 12   | 7    |
| Hcrtr2        | -1.29489 | 0.964773 | 4.096916 | 0.042961522 | 0.751185748 | 55   | 50   | 65   | 12  | 29   | 14   |
| ExpH5         | -1.29473 | 6.416335 | 11.69575 | 0.000626432 | 0.075720799 | 16   | 27   | 16   | 3   | 4    | 12   |
| Tctn1         | -1.29104 | 2.610459 | 8.468948 | 0.003612603 | 0.229174424 | 74   | 123  | 69   | 21  | 31   | 29   |
| Akr1c13       | -1.28828 | 4.114736 | 3.9412   | 0.04711716  | 0.786480075 | 5    | 8    | 6    | 0   | 0    | 6    |
| Angptl1       | -1.2705  | 4.421279 | 8.838564 | 0.00294931  | 0.197686487 | 75   | 53   | 17   | 10  | 33   | 8    |
| Gjc2          | -1.2643  | 2.914318 | 8.166508 | 0.004267097 | 0.252922487 | 258  | 171  | 108  | 42  | 87   | 48   |
| Mgmt          | -1.23734 | 2.857838 | 5.936    | 0.014834647 | 0.473564206 | 96   | 56   | 26   | 16  | 31   | 13   |
| Det1          | -1.22715 | 2.767176 | 6.001918 | 0.014290332 | 0.461667848 | 21   | 42   | 47   | 13  | 6    | 13   |
| Srpx          | -1.22323 | 3.932594 | 13.15197 | 0.000287218 | 0.043519553 | 85   | 81   | 69   | 16  | 36   | 28   |
| Cdt1          | -1.20413 | 3.286857 | 4.183127 | 0.040828297 | 0.732898399 | 9    | 48   | 21   | 6   | 4    | 14   |
| Chst9         | -1.20352 | 4.429379 | 5.772853 | 0.016275594 | 0.494228684 | 2    | 25   | 19   | 3   | 2    | 10   |
| Kcnp1         | -1.2009  | 3.367551 | 16.46102 | 4.96606E-05 | 0.012720219 | 369  | 315  | 299  | 60  | 174  | 116  |
| Smagp         | -1.19227 | 6.724717 | 21.35656 | 3.81314E-06 | 0.001953419 | 76   | 77   | 38   | 10  | 33   | 25   |
| Car3          | -1.17957 | 8.156719 | 17.46533 | 2.92595E-05 | 0.009013831 | 28   | 34   | 58   | 7   | 15   | 20   |
| Esrrg         | -1.17829 | 3.391285 | 11.40397 | 0.000732873 | 0.084776846 | 325  | 293  | 356  | 57  | 137  | 147  |
| Lingo3        | -1.17615 | 1.17422  | 4.448821 | 0.034925346 | 0.689745603 | 66   | 72   | 57   | 13  | 33   | 23   |
| Arc           | -1.16871 | 1.685539 | 4.375661 | 0.036455684 | 0.700170206 | 33   | 40   | 29   | 10  | 6    | 16   |
| Pla2g5        | -1.15331 | 2.916435 | 7.32599  | 0.006796453 | 0.326567584 | 55   | 42   | 30   | 6   | 17   | 23   |
| A730017L22Rik | -1.15075 | 1.788011 | 3.928709 | 0.047468368 | 0.787455204 | 37   | 57   | 77   | 8   | 27   | 27   |
| Dpyd          | -1.1419  | 1.878397 | 6.46957  | 0.010973705 | 0.418402432 | 74   | 78   | 76   | 18  | 35   | 27   |
| Smad9         | -1.14173 | 3.735261 | 16.46396 | 4.95837E-05 | 0.012720219 | 330  | 476  | 466  | 65  | 228  | 181  |
| Zfp599        | -1.1378  | 1.34816  | 4.651756 | 0.031021794 | 0.658325037 | 29   | 43   | 30   | 10  | 11   | 13   |
| Nfe2l3        | -1.13425 | 4.618723 | 9.499609 | 0.002055157 | 0.166235956 | 19   | 70   | 50   | 17  | 15   | 14   |
| Tmigd1        | -1.13237 | 2.953915 | 6.835651 | 0.008935614 | 0.378461956 | 32   | 17   | 28   | 3   | 15   | 11   |
| Obfc2a        | -1.12686 | 4.418751 | 10.40626 | 0.001255885 | 0.122825572 | 26   | 68   | 53   | 8   | 27   | 19   |
| 2810417H13Rik | -1.12266 | 5.344493 | 7.245215 | 0.007109018 | 0.336911098 | 26   | 12   | 30   | 1   | 15   | 10   |
| Rassf9        | -1.11284 | 3.132484 | 4.847813 | 0.027681208 | 0.622349921 | 10   | 7    | 28   | 1   | 10   | 6    |
| Osgin1        | -1.11273 | 4.015033 | 13.56703 | 0.000230193 | 0.037151488 | 53   | 46   | 64   | 5   | 30   | 27   |
| Supv31l       | -1.11225 | 3.287592 | 14.34712 | 0.000152012 | 0.026808903 | 125  | 125  | 180  | 38  | 70   | 45   |
| Plk4          | -1.11101 | 2.34158  | 4.321261 | 0.037639023 | 0.706159831 | 28   | 98   | 33   | 6   | 37   | 20   |
| Calb1         | -1.09459 | 4.570829 | 23.36775 | 1.33803E-06 | 0.000846735 | 747  | 737  | 785  | 179 | 358  | 284  |
| Col13a1       | -1.08988 | 3.963179 | 8.177731 | 0.004240776 | 0.25205675  | 28   | 52   | 28   | 14  | 8    | 15   |
| Mcm5          | -1.08073 | 4.031514 | 4.194596 | 0.040553019 | 0.730176079 | 9    | 25   | 60   | 14  | 5    | 10   |
| Aldh1a3       | -1.07182 | 5.12137  | 9.532665 | 0.002018468 | 0.164999521 | 27   | 48   | 54   | 13  | 13   | 20   |
| Sema7a        | -1.06462 | 4.893539 | 31.63552 | 1.85997E-08 | 2.35406E-05 | 836  | 1085 | 919  | 186 | 487  | 411  |
| Cdr1          | -1.05387 | 7.008792 | 32.33755 | 1.29585E-08 | 1.74259E-05 | 3189 | 4694 | 4589 | 797 | 1851 | 2044 |
| Tlr4          | -1.05219 | 4.303831 | 14.53201 | 0.000137798 | 0.025530122 | 85   | 111  | 73   | 18  | 57   | 31   |
| Cxcr4         | -1.0513  | 2.455475 | 4.199089 | 0.04044569  | 0.730176079 | 147  | 161  | 186  | 50  | 112  | 24   |
| Cep152        | -1.04842 | 2.348155 | 5.45396  | 0.01952402  | 0.542037179 | 44   | 51   | 63   | 19  | 24   | 13   |
| Zfp384        | -1.04831 | 2.430445 | 6.278796 | 0.012219106 | 0.429066966 | 64   | 56   | 34   | 10  | 34   | 18   |
| Folh1         | -1.04625 | 2.156953 | 5.902441 | 0.015119916 | 0.477709429 | 103  | 156  | 142  | 29  | 81   | 46   |
| Hapln1        | -1.0422  | 2.538252 | 7.690987 | 0.005549728 | 0.289825134 | 154  | 178  | 191  | 28  | 98   | 83   |
| Olfm3         | -1.04057 | 2.256241 | 6.909066 | 0.00857598  | 0.370523669 | 119  | 142  | 168  | 32  | 89   | 47   |
| Rem2          | -1.03155 | 3.874109 | 16.9326  | 3.87307E-05 | 0.011111063 | 455  | 420  | 492  | 118 | 248  | 155  |
| Gemin4        | -1.02991 | 2.406003 | 4.547986 | 0.032957488 | 0.674062088 | 49   | 60   | 22   | 14  | 26   | 10   |
| Fgd2          | -1.02877 | 2.471956 | 4.084782 | 0.043271031 | 0.752617461 | 10   | 23   | 43   | 3   | 19   | 9    |
| Ccdc111       | -1.02013 | 2.178823 | 4.81669  | 0.02818542  | 0.625442919 | 41   | 75   | 63   | 9   | 56   | 13   |
| Gal           | -1.0114  | 2.198182 | 4.071409 | 0.043614888 | 0.755034398 | 132  | 135  | 137  | 14  | 95   | 68   |
| 9130011E15Rik | -1.00344 | 2.328128 | 6.304174 | 0.012045403 | 0.429066966 | 65   | 61   | 44   | 18  | 24   | 22   |
| Gstm2         | -0.9851  | 5.033719 | 19.34638 | 1.09026E-05 | 0.004115431 | 332  | 263  | 234  | 46  | 220  | 98   |
| Isg20l2       | -0.97851 | 2.80925  | 4.682322 | 0.030474529 | 0.657228793 | 77   | 93   | 97   | 17  | 80   | 21   |
| Aldh3a1       | -0.96917 | 13.67583 | 4.284705 | 0.03845675  | 0.711111914 | 4    | 18   | 10   | 2   | 7    | 4    |
| C3            | -0.96264 | 2.709076 | 4.982245 | 0.025608733 | 0.605491755 | 32   | 37   | 22   | 8   | 17   | 12   |
| C1qtnf7       | -0.95747 | 3.372223 | 5.665418 | 0.017302589 | 0.51243781  | 29   | 45   | 49   | 2   | 16   | 33   |
| D2hgdh        | -0.94663 | 2.619748 | 7.691839 | 0.005547108 | 0.289825134 | 63   | 74   | 66   | 15  | 38   | 31   |
| Zcwpw1        | -0.94269 | 3.804217 | 12.85078 | 0.000337339 | 0.047961082 | 114  | 217  | 179  | 50  | 94   | 59   |
| Nos1          | -0.94138 | 4.411648 | 15.14261 | 9.96876E-05 | 0.019859985 | 619  | 558  | 746  | 122 | 501  | 234  |
| Angptl7       | -0.93306 | 8.451049 | 6.586297 | 0.010276671 | 0.402023377 | 106  | 161  | 188  | 7   | 168  | 54   |



|               |          |          |          |             |             |      |      |      |     |      |     |
|---------------|----------|----------|----------|-------------|-------------|------|------|------|-----|------|-----|
| Rab11fip1     | -0.93305 | 6.155877 | 7.492857 | 0.006194418 | 0.309951412 | 14   | 21   | 31   | 4   | 20   | 4   |
| Slc25a36      | -0.93298 | 2.286823 | 4.497391 | 0.033946611 | 0.682612404 | 81   | 85   | 81   | 31  | 22   | 36  |
| Nmral1        | -0.92957 | 2.66916  | 5.175696 | 0.022904999 | 0.579111594 | 51   | 98   | 50   | 16  | 33   | 32  |
| Bambi         | -0.91801 | 3.383094 | 6.858201 | 0.008823536 | 0.376191245 | 133  | 221  | 192  | 39  | 142  | 60  |
| Mmp23         | -0.91507 | 2.239825 | 4.608611 | 0.03181179  | 0.665819534 | 33   | 37   | 30   | 3   | 20   | 21  |
| Ednra         | -0.91    | 2.16162  | 4.213606 | 0.040101014 | 0.728202461 | 72   | 72   | 93   | 19  | 64   | 22  |
| Cd302         | -0.9097  | 2.840179 | 5.088155 | 0.024089808 | 0.591685293 | 64   | 60   | 73   | 28  | 21   | 24  |
| D430042O09Rik | -0.90744 | 3.122157 | 7.286681 | 0.006946771 | 0.330532334 | 113  | 82   | 152  | 22  | 96   | 40  |
| Fam84b        | -0.90471 | 5.337327 | 9.726482 | 0.001816318 | 0.151985985 | 49   | 68   | 76   | 1   | 53   | 35  |
| Slc17a7       | -0.90341 | 5.470233 | 33.88027 | 5.86099E-09 | 9.7004E-06  | 1232 | 1506 | 1355 | 319 | 904  | 549 |
| 3110009E18Rik | -0.89954 | 2.222764 | 4.197485 | 0.040483979 | 0.730176079 | 27   | 57   | 62   | 6   | 33   | 26  |
| Lypd6b        | -0.88668 | 3.13278  | 9.421927 | 0.002144061 | 0.167681269 | 69   | 83   | 86   | 12  | 52   | 42  |
| Serpinb1a     | -0.88612 | 6.334673 | 28.53535 | 9.20034E-08 | 7.91818E-05 | 1282 | 1264 | 1206 | 307 | 882  | 469 |
| Hs3st2        | -0.88341 | 4.147418 | 16.79286 | 4.16899E-05 | 0.011649344 | 501  | 552  | 553  | 131 | 330  | 233 |
| Zfp952        | -0.87961 | 4.206373 | 14.20423 | 0.000164001 | 0.028456855 | 221  | 305  | 256  | 58  | 149  | 131 |
| Ccbl2         | -0.8785  | 2.573837 | 4.539559 | 0.033120123 | 0.67576525  | 73   | 76   | 103  | 30  | 28   | 39  |
| Pdzk1ip1      | -0.87788 | 8.336936 | 7.62556  | 0.005754679 | 0.295507569 | 44   | 30   | 14   | 4   | 28   | 8   |
| Ndp           | -0.87715 | 2.934401 | 4.990558 | 0.025485989 | 0.603252529 | 218  | 221  | 239  | 66  | 89   | 116 |
| Ung           | -0.87546 | 3.417844 | 5.403144 | 0.020100506 | 0.549185963 | 44   | 35   | 39   | 7   | 22   | 23  |
| Gabra5        | -0.85963 | 2.843091 | 5.994089 | 0.01435389  | 0.463025932 | 210  | 177  | 243  | 58  | 127  | 87  |
| Zbtb24        | -0.8536  | 2.281663 | 4.678295 | 0.030546049 | 0.657228793 | 43   | 51   | 71   | 15  | 35   | 22  |
| Sirt6         | -0.84482 | 3.649072 | 9.438891 | 0.002124319 | 0.167681269 | 193  | 221  | 165  | 31  | 154  | 92  |
| Klhdc5        | -0.83318 | 3.07465  | 6.718859 | 0.009539865 | 0.38801464  | 106  | 152  | 110  | 25  | 83   | 61  |
| Ncstn         | -0.83298 | 3.785418 | 6.602733 | 0.010182235 | 0.401983424 | 79   | 119  | 132  | 21  | 55   | 70  |
| Rbl1          | -0.83278 | 3.73942  | 4.642995 | 0.031180541 | 0.659666203 | 21   | 53   | 22   | 12  | 16   | 13  |
| Pvalb         | -0.83228 | 6.006608 | 22.89643 | 1.70969E-06 | 0.001021826 | 1898 | 2125 | 1810 | 562 | 1178 | 801 |
| Chrna6        | -0.83038 | 2.881965 | 4.517962 | 0.033540756 | 0.67948957  | 170  | 242  | 231  | 37  | 116  | 139 |
| Ppm1h         | -0.83027 | 4.15118  | 9.713152 | 0.001829539 | 0.151985985 | 265  | 353  | 418  | 51  | 285  | 169 |
| Usp38         | -0.82841 | 3.52529  | 8.272247 | 0.004025565 | 0.2431336   | 126  | 141  | 165  | 34  | 103  | 61  |
| Vav3          | -0.82534 | 4.197631 | 9.416037 | 0.002150959 | 0.167681269 | 270  | 391  | 265  | 85  | 153  | 160 |
| March9        | -0.82379 | 3.091306 | 6.418571 | 0.011293301 | 0.420038738 | 111  | 96   | 124  | 18  | 75   | 63  |
| 1700030C10Rik | -0.82081 | 2.581892 | 4.117216 | 0.042448877 | 0.748631171 | 73   | 145  | 123  | 27  | 89   | 42  |
| Cenpl         | -0.81618 | 2.971552 | 5.179343 | 0.022856963 | 0.579064072 | 76   | 83   | 75   | 13  | 82   | 23  |
| Tmem138       | -0.80366 | 3.113015 | 4.666563 | 0.030755413 | 0.657286399 | 119  | 124  | 95   | 11  | 115  | 52  |
| Dgkb          | -0.79791 | 2.536337 | 3.883918 | 0.048750653 | 0.791637017 | 135  | 209  | 157  | 47  | 90   | 83  |
| Lace1         | -0.79512 | 2.953902 | 5.857408 | 0.015511622 | 0.484394866 | 123  | 139  | 98   | 43  | 69   | 45  |
| P2rx6         | -0.79419 | 3.226166 | 4.575991 | 0.032422995 | 0.671233175 | 368  | 232  | 191  | 60  | 202  | 124 |
| Gdpd2         | -0.7917  | 4.637227 | 7.640928 | 0.005705857 | 0.294405785 | 90   | 121  | 53   | 31  | 57   | 31  |
| Pigv          | -0.78641 | 3.60386  | 6.557635 | 0.010443505 | 0.406178199 | 53   | 107  | 80   | 20  | 67   | 27  |
| Atad5         | -0.78489 | 3.366869 | 4.339591 | 0.037235872 | 0.704024823 | 75   | 86   | 137  | 21  | 49   | 65  |
| Tmem40        | -0.78393 | 4.663187 | 6.134281 | 0.013258546 | 0.441546373 | 108  | 79   | 42   | 18  | 63   | 31  |
| Cd274         | -0.78193 | 5.338081 | 6.345502 | 0.011767933 | 0.427765628 | 66   | 33   | 46   | 10  | 48   | 14  |
| Zfp652        | -0.78053 | 3.521295 | 6.217151 | 0.012651851 | 0.433666095 | 65   | 72   | 91   | 28  | 44   | 29  |
| Pde5a         | -0.77813 | 4.612298 | 6.438799 | 0.011165411 | 0.41872495  | 62   | 59   | 109  | 11  | 83   | 24  |
| Irf6          | -0.7712  | 7.158437 | 5.399817 | 0.020138861 | 0.549185963 | 64   | 73   | 19   | 10  | 25   | 38  |
| Rbm47         | -0.77063 | 6.733602 | 7.834    | 0.005127252 | 0.28432464  | 30   | 47   | 47   | 11  | 27   | 20  |
| Lrtm2         | -0.76496 | 3.932681 | 4.488106 | 0.034131473 | 0.683773541 | 20   | 48   | 32   | 3   | 33   | 14  |
| 2010300C02Rik | -0.76127 | 3.176907 | 4.669096 | 0.030710081 | 0.657286399 | 36   | 50   | 33   | 10  | 20   | 25  |
| Spp1          | -0.75942 | 3.891684 | 6.141818 | 0.013202155 | 0.441083167 | 373  | 396  | 492  | 97  | 371  | 163 |
| Epn3          | -0.75918 | 7.568545 | 38.06382 | 6.8468E-10  | 1.63684E-06 | 977  | 1095 | 1121 | 303 | 641  | 527 |
| Yes1          | -0.75847 | 3.749078 | 4.426135 | 0.035392565 | 0.694145031 | 128  | 213  | 169  | 47  | 60   | 114 |
| Gm765         | -0.75825 | 4.301888 | 6.769042 | 0.009275259 | 0.384537952 | 627  | 470  | 620  | 169 | 355  | 268 |
| Haplh4        | -0.74132 | 4.705497 | 12.94739 | 0.000320368 | 0.046891447 | 725  | 791  | 783  | 210 | 486  | 387 |
| Fnip2         | -0.73915 | 3.943156 | 5.435632 | 0.019729953 | 0.543546322 | 107  | 74   | 62   | 21  | 62   | 37  |
| Hps5          | -0.7368  | 3.951464 | 7.680206 | 0.005582978 | 0.290855605 | 223  | 197  | 312  | 88  | 152  | 92  |
| Pla2g4b       | -0.73526 | 3.367335 | 5.494492 | 0.019076473 | 0.533051164 | 264  | 288  | 267  | 66  | 267  | 90  |
| B3gat1        | -0.73404 | 3.114001 | 4.023972 | 0.044857962 | 0.765395644 | 103  | 218  | 115  | 49  | 79   | 67  |
| Naa40         | -0.73368 | 3.936953 | 8.913765 | 0.002830292 | 0.19402479  | 113  | 130  | 153  | 42  | 102  | 46  |
| Gda           | -0.73061 | 8.16427  | 38.60256 | 5.19508E-10 | 1.39722E-06 | 1194 | 1605 | 1607 | 407 | 957  | 723 |
| Baiap2l1      | -0.72703 | 4.705571 | 13.06225 | 0.000301308 | 0.044403681 | 306  | 269  | 371  | 81  | 265  | 127 |
| Car2          | -0.72019 | 5.064846 | 10.33824 | 0.001303025 | 0.124864452 | 831  | 1157 | 954  | 283 | 529  | 547 |
| Chchd5        | -0.71992 | 3.702736 | 5.314134 | 0.0211531   | 0.560505061 | 199  | 204  | 118  | 49  | 138  | 72  |
| Clec2l        | -0.71635 | 5.551773 | 15.82744 | 6.9389E-05  | 0.015551802 | 1254 | 1453 | 1324 | 306 | 832  | 832 |
| Ppp2r1b       | -0.71461 | 4.627408 | 4.430862 | 0.035294688 | 0.692883681 | 19   | 41   | 80   | 8   | 39   | 23  |

|               |          |          |          |              |             |      |      |      |     |      |      |
|---------------|----------|----------|----------|--------------|-------------|------|------|------|-----|------|------|
| 2410131K14Rik | -0.71135 | 3.764718 | 7.403685 | 0.006509042  | 0.318292152 | 245  | 292  | 306  | 58  | 259  | 124  |
| Cpt2          | -0.70941 | 4.028405 | 5.88442  | 0.015275424  | 0.480505892 | 348  | 256  | 301  | 75  | 146  | 210  |
| A2m           | -0.70694 | 8.856523 | 8.141756 | 0.004325738  | 0.255371077 | 238  | 163  | 103  | 31  | 139  | 95   |
| Ptpn18        | -0.70332 | 3.616733 | 3.999063 | 0.045525556  | 0.773960303 | 110  | 120  | 49   | 17  | 69   | 58   |
| Wfs1          | -0.6987  | 6.053688 | 16.30706 | 5.3863E-05   | 0.013249948 | 317  | 397  | 437  | 93  | 225  | 241  |
| Fndc5         | -0.69672 | 5.453532 | 14.08588 | 0.00017465   | 0.029823541 | 1061 | 1251 | 1378 | 317 | 887  | 630  |
| Lhfp          | -0.68832 | 3.833689 | 6.328793 | 0.011879317  | 0.429066966 | 157  | 336  | 354  | 61  | 205  | 160  |
| Heatr2        | -0.68638 | 3.351604 | 3.909014 | 0.048027765  | 0.789126837 | 76   | 156  | 107  | 27  | 118  | 35   |
| Zfp101        | -0.68411 | 2.979773 | 4.761299 | 0.02910658   | 0.639273059 | 109  | 125  | 169  | 38  | 106  | 58   |
| Ccdc61        | -0.68306 | 3.024656 | 4.379682 | 0.036369776  | 0.699939273 | 106  | 69   | 94   | 28  | 69   | 38   |
| Sel1l3        | -0.68179 | 4.15808  | 9.372559 | 0.002202578  | 0.168124366 | 356  | 405  | 497  | 116 | 254  | 241  |
| Slc25a37      | -0.68041 | 4.898957 | 6.589025 | 0.010260934  | 0.402023377 | 417  | 365  | 430  | 166 | 292  | 112  |
| Celsr1        | -0.67675 | 4.733599 | 5.65683  | 0.017387525  | 0.51247945  | 56   | 67   | 93   | 11  | 79   | 27   |
| Ppp1r13l      | -0.67596 | 5.858998 | 5.659376 | 0.017362296  | 0.51243781  | 37   | 36   | 33   | 10  | 22   | 21   |
| St3gal5       | -0.67416 | 6.281409 | 18.34864 | 1.8395E-05   | 0.006282338 | 1340 | 1051 | 1182 | 362 | 949  | 501  |
| Kcns1         | -0.66804 | 4.098281 | 6.533948 | 0.010583478  | 0.408089822 | 368  | 441  | 381  | 115 | 232  | 232  |
| D17H6S53E     | -0.66739 | 2.861429 | 4.360067 | 0.036790857  | 0.700860741 | 75   | 95   | 112  | 22  | 81   | 44   |
| Ahcyl2        | -0.66453 | 4.486229 | 7.605003 | 0.005820658  | 0.297475712 | 449  | 669  | 444  | 137 | 325  | 314  |
| HYOU1         | -0.66356 | 3.956475 | 9.393817 | 0.002177184  | 0.167900698 | 203  | 287  | 240  | 58  | 201  | 121  |
| Gyg           | -0.66023 | 8.284297 | 17.02137 | 3.69614E-05  | 0.010893995 | 1403 | 1195 | 1451 | 372 | 1039 | 670  |
| Prps2         | -0.65319 | 4.219853 | 7.854402 | 0.005069712  | 0.282590488 | 206  | 247  | 311  | 52  | 195  | 154  |
| Ntng1         | -0.65282 | 6.370323 | 22.26392 | 2.3763E-06   | 0.001310988 | 2041 | 2084 | 2603 | 639 | 1496 | 1232 |
| Hhatl         | -0.64943 | 3.996539 | 6.873048 | 0.008750528  | 0.375155914 | 445  | 391  | 524  | 137 | 305  | 238  |
| 2610015P09Rik | -0.64933 | 4.762472 | 6.572268 | 0.010357989  | 0.404469144 | 212  | 189  | 250  | 43  | 147  | 150  |
| Plekhn1       | -0.64689 | 6.587936 | 4.760665 | 0.029117289  | 0.639273059 | 30   | 32   | 44   | 11  | 17   | 25   |
| Abca1         | -0.64562 | 4.430037 | 7.71396  | 0.005479543  | 0.289825134 | 380  | 397  | 649  | 125 | 371  | 242  |
| St5           | -0.64439 | 4.25842  | 6.067476 | 0.013769362  | 0.450930897 | 199  | 280  | 217  | 75  | 145  | 122  |
| C2cd3         | -0.64486 | 3.712878 | 4.946156 | 0.026148752  | 0.610213171 | 153  | 142  | 126  | 46  | 98   | 68   |
| Rnf144b       | -0.64118 | 5.028001 | 4.723663 | 0.029750307  | 0.649196356 | 89   | 63   | 85   | 18  | 32   | 68   |
| Ttc37         | -0.64012 | 3.156465 | 4.088322 | 0.043180483  | 0.752617461 | 73   | 93   | 115  | 22  | 66   | 57   |
| Mrps31        | -0.63438 | 3.761437 | 3.860546 | 0.049434236  | 0.798973908 | 189  | 362  | 217  | 67  | 241  | 105  |
| Naf1          | -0.63358 | 4.009279 | 5.44286  | 0.019648475  | 0.542873892 | 141  | 205  | 225  | 63  | 102  | 111  |
| Mab21l2       | -0.62526 | 3.812741 | 7.432074 | 0.006407144  | 0.316223999 | 332  | 422  | 412  | 106 | 327  | 185  |
| Gprc5c        | -0.62401 | 5.502815 | 11.59705 | 0.000660567  | 0.078092049 | 958  | 1246 | 1163 | 293 | 886  | 600  |
| Mrpl22        | -0.62307 | 3.395299 | 4.855128 | 0.027564072  | 0.621772341 | 184  | 133  | 203  | 46  | 106  | 115  |
| Plagl2        | -0.62083 | 3.499136 | 4.121028 | 0.042353327  | 0.748172569 | 43   | 63   | 101  | 20  | 53   | 34   |
| Ncan          | -0.6186  | 3.823312 | 5.237173 | 0.022109178  | 0.574915158 | 301  | 505  | 397  | 138 | 296  | 171  |
| Cdk8          | -0.61733 | 3.77077  | 4.625462 | 0.031500769  | 0.662532303 | 89   | 117  | 182  | 28  | 135  | 53   |
| Nhlrc1        | -0.61483 | 3.119676 | 4.282573 | 0.038505025  | 0.711136587 | 210  | 197  | 155  | 46  | 157  | 103  |
| Gabrg1        | -0.61397 | 4.134488 | 5.395569 | 0.020187944  | 0.549441328 | 320  | 631  | 554  | 122 | 400  | 279  |
| Slc10a7       | -0.61192 | 3.867414 | 4.18258  | 0.040841475  | 0.732898399 | 127  | 120  | 123  | 45  | 80   | 61   |
| Esrra         | -0.61064 | 4.1872   | 5.156347 | 0.023161561  | 0.58316509  | 161  | 264  | 181  | 52  | 186  | 92   |
| Plch2         | -0.60991 | 5.171288 | 5.360285 | 0.020600413  | 0.553142638 | 49   | 51   | 46   | 18  | 42   | 17   |
| Lrrc20        | -0.6078  | 4.926939 | 10.4987  | 0.0021194588 | 0.118445383 | 532  | 540  | 452  | 154 | 359  | 280  |
| Chst2         | -0.60481 | 5.591271 | 9.42502  | 0.002140447  | 0.167681269 | 1243 | 1160 | 1341 | 344 | 854  | 762  |
| Tysnd1        | -0.60386 | 4.345828 | 6.461027 | 0.011026592  | 0.418402432 | 264  | 207  | 264  | 84  | 148  | 139  |
| 1110038D17Rik | -0.60327 | 3.648119 | 6.027249 | 0.014086673  | 0.457184402 | 128  | 158  | 140  | 36  | 115  | 78   |
| Rfxap         | -0.60253 | 3.790566 | 5.209776 | 0.022460228  | 0.578055343 | 235  | 257  | 252  | 51  | 208  | 153  |
| Arhgap22      | -0.60072 | 4.231118 | 5.32079  | 0.021072454  | 0.559746819 | 255  | 194  | 230  | 79  | 154  | 115  |
| D430041D05Rik | -0.59902 | 4.551742 | 4.777301 | 0.028837283  | 0.635720257 | 569  | 568  | 854  | 141 | 499  | 446  |
| Tmem56        | -0.59462 | 4.440873 | 6.984435 | 0.008222162  | 0.360301504 | 469  | 713  | 634  | 164 | 434  | 359  |
| Bai1          | -0.59456 | 3.915373 | 6.227293 | 0.012579589  | 0.433059906 | 423  | 465  | 369  | 119 | 348  | 213  |
| Rnf128        | -0.59024 | 5.139289 | 5.365662 | 0.020536995  | 0.553142638 | 991  | 876  | 976  | 292 | 853  | 404  |
| Pcdh7         | -0.58947 | 6.880277 | 19.54598 | 9.82072E-06  | 0.00386348  | 1653 | 2303 | 2238 | 549 | 1617 | 1164 |
| 1700106N22Rik | -0.58806 | 3.338735 | 4.509452 | 0.033708046  | 0.67948957  | 152  | 213  | 242  | 53  | 162  | 112  |
| Galm          | -0.58683 | 3.964034 | 4.853863 | 0.027584294  | 0.621772341 | 153  | 167  | 127  | 57  | 84   | 83   |
| Cwc22         | -0.58603 | 3.787488 | 4.519199 | 0.033516522  | 0.67948957  | 94   | 124  | 94   | 30  | 108  | 36   |
| Bckdk         | -0.58054 | 5.300544 | 13.07016 | 0.000300038  | 0.044403681 | 331  | 359  | 361  | 112 | 238  | 201  |
| D8Ertd82e     | -0.58031 | 2.802229 | 3.858405 | 0.049497362  | 0.798973908 | 105  | 138  | 127  | 36  | 117  | 51   |
| 9030425E11Rik | -0.578   | 6.010994 | 6.672983 | 0.009788524  | 0.395028775 | 1487 | 889  | 1500 | 336 | 894  | 869  |
| Uba7          | -0.57779 | 4.609596 | 4.872848 | 0.027282442  | 0.62042549  | 98   | 77   | 78   | 16  | 90   | 40   |
| Zdhhc5        | -0.57699 | 6.164018 | 9.266462 | 0.002333881  | 0.173757006 | 209  | 266  | 253  | 85  | 184  | 114  |
| 8430410A17Rik | -0.57656 | 4.122466 | 6.623938 | 0.01006171   | 0.400833293 | 230  | 222  | 227  | 69  | 161  | 131  |
| Npri2         | -0.57412 | 4.418016 | 6.765229 | 0.009295099  | 0.384537952 | 409  | 339  | 301  | 100 | 270  | 202  |

|               |          |          |          |             |             |      |      |      |     |      |      |
|---------------|----------|----------|----------|-------------|-------------|------|------|------|-----|------|------|
| Dclk2         | -0.57332 | 5.364602 | 6.257925 | 0.012363893 | 0.429066966 | 1069 | 1205 | 1192 | 356 | 878  | 614  |
| Eif2s3y       | -0.57159 | 4.316655 | 4.38095  | 0.036342742 | 0.699939273 | 113  | 141  | 115  | 25  | 74   | 100  |
| Krt222        | -0.57154 | 3.879331 | 6.431784 | 0.011209592 | 0.41872495  | 388  | 386  | 398  | 111 | 285  | 235  |
| Tuft1         | -0.56918 | 6.423021 | 5.122278 | 0.023620584 | 0.586182792 | 33   | 77   | 47   | 11  | 52   | 24   |
| Stxbp2        | -0.56382 | 5.566527 | 3.973032 | 0.046234441 | 0.779758933 | 75   | 95   | 81   | 47  | 40   | 34   |
| Steap3        | -0.56235 | 5.085903 | 5.196227 | 0.022635963 | 0.579064072 | 325  | 340  | 385  | 83  | 238  | 252  |
| 1700020I14Rik | -0.56167 | 4.832564 | 9.033727 | 0.002650436 | 0.190089255 | 377  | 350  | 342  | 114 | 296  | 174  |
| Cidea         | -0.55973 | 4.253781 | 4.386851 | 0.036217142 | 0.699504517 | 447  | 528  | 520  | 175 | 422  | 205  |
| Arl5b         | -0.55863 | 4.858772 | 8.969585 | 0.00274511  | 0.193396506 | 195  | 196  | 208  | 63  | 163  | 101  |
| Rrm1          | -0.55854 | 5.418382 | 6.131796 | 0.01327719  | 0.441546373 | 152  | 227  | 250  | 63  | 202  | 85   |
| Pcyox1l       | -0.55411 | 6.544386 | 7.480475 | 0.006237163 | 0.311366123 | 2238 | 2835 | 2735 | 822 | 2554 | 1002 |
| Cdk5rap2      | -0.55388 | 5.42262  | 8.757272 | 0.003083699 | 0.203524147 | 696  | 719  | 759  | 226 | 619  | 352  |
| 2810432D09Rik | -0.55273 | 4.435483 | 7.01126  | 0.008099865 | 0.357857709 | 293  | 246  | 302  | 86  | 198  | 170  |
| Gsta4         | -0.54799 | 11.22333 | 11.6776  | 0.000632571 | 0.076035719 | 183  | 187  | 227  | 45  | 177  | 115  |
| Amigo2        | -0.54759 | 4.576499 | 4.128582 | 0.042164678 | 0.746732391 | 621  | 583  | 726  | 284 | 408  | 266  |
| Srr           | -0.547   | 5.238017 | 12.84102 | 0.000339103 | 0.047961082 | 784  | 786  | 819  | 259 | 660  | 391  |
| Rab22a        | -0.54493 | 4.717506 | 8.953839 | 0.002768871 | 0.193396506 | 307  | 321  | 330  | 107 | 237  | 173  |
| St3gal1       | -0.54451 | 3.338384 | 4.343222 | 0.037156555 | 0.704024823 | 95   | 146  | 169  | 36  | 119  | 74   |
| Fgf9          | -0.53934 | 4.025453 | 4.825971 | 0.028034078 | 0.625058265 | 344  | 486  | 379  | 103 | 379  | 214  |
| Stk24         | -0.53915 | 7.19001  | 15.60793 | 7.7927E-05  | 0.016664322 | 579  | 682  | 582  | 146 | 516  | 386  |
| Traf3         | -0.53831 | 4.716219 | 7.726526 | 0.005441534 | 0.289802085 | 324  | 403  | 434  | 99  | 323  | 232  |
| Nexn          | -0.53559 | 5.239818 | 6.258587 | 0.012359277 | 0.429066966 | 570  | 914  | 761  | 167 | 602  | 509  |
| Pdk3          | -0.53518 | 4.780704 | 5.539716 | 0.018589601 | 0.529766703 | 483  | 555  | 619  | 183 | 479  | 253  |
| Plekhg1       | -0.53342 | 5.669586 | 5.442272 | 0.019655083 | 0.542873892 | 178  | 216  | 322  | 81  | 244  | 79   |
| Scx           | -0.53311 | 3.884689 | 4.102776 | 0.042812855 | 0.750131423 | 289  | 382  | 351  | 84  | 364  | 158  |
| Wnk4          | -0.53201 | 4.548959 | 4.354157 | 0.036918717 | 0.702336979 | 52   | 70   | 97   | 21  | 72   | 31   |
| 5930434B04Rik | -0.52996 | 5.40403  | 11.97852 | 0.000538173 | 0.068924538 | 504  | 596  | 580  | 179 | 407  | 329  |
| Galnt10       | -0.52838 | 4.236812 | 5.283096 | 0.021533424 | 0.56709077  | 279  | 246  | 256  | 82  | 178  | 166  |
| Dcun1d2       | -0.52699 | 3.598628 | 5.1444   | 0.023321466 | 0.58316509  | 253  | 272  | 272  | 81  | 217  | 147  |
| Slit2         | -0.52535 | 5.140411 | 9.756527 | 0.001786872 | 0.151577456 | 470  | 442  | 511  | 154 | 360  | 269  |
| H2-Ab1        | -0.52329 | 5.548913 | 5.098279 | 0.02394959  | 0.590939657 | 1146 | 1051 | 943  | 302 | 1073 | 477  |
| Mrpl50        | -0.52265 | 4.216287 | 5.820956 | 0.015836337 | 0.490265651 | 251  | 341  | 354  | 81  | 255  | 199  |
| Ggh           | -0.52192 | 4.051077 | 4.462103 | 0.034654798 | 0.687852983 | 153  | 215  | 232  | 41  | 187  | 124  |
| Zfp3612       | -0.5198  | 4.651468 | 5.177881 | 0.022876207 | 0.579064072 | 139  | 197  | 190  | 35  | 188  | 92   |
| Gpr64         | -0.51878 | 4.688271 | 5.631251 | 0.017643032 | 0.51579438  | 616  | 611  | 816  | 223 | 538  | 366  |
| 2310016C08Rik | -0.51792 | 3.92452  | 5.3674   | 0.020516539 | 0.553142638 | 265  | 294  | 255  | 91  | 205  | 152  |
| Sphkap        | -0.51547 | 4.99345  | 5.141533 | 0.023360018 | 0.58316509  | 243  | 396  | 428  | 104 | 219  | 252  |
| Abcg1         | -0.51512 | 5.313978 | 7.551722 | 0.005995276 | 0.302803654 | 396  | 577  | 592  | 140 | 435  | 314  |
| Nrarp         | -0.51243 | 5.585225 | 5.331218 | 0.020946746 | 0.558476062 | 248  | 396  | 311  | 65  | 354  | 164  |
| Lrrc4         | -0.51203 | 4.548596 | 4.098426 | 0.042923144 | 0.751185748 | 150  | 192  | 284  | 59  | 176  | 119  |
| Kcnj10        | -0.5089  | 4.442453 | 6.030592 | 0.014060021 | 0.457184402 | 547  | 625  | 625  | 180 | 564  | 295  |
| Accn2         | -0.50593 | 5.143399 | 7.804959 | 0.005210305 | 0.285981922 | 869  | 914  | 1064 | 337 | 662  | 540  |
| Col23a1       | -0.50474 | 5.295223 | 6.506635 | 0.010747269 | 0.412925444 | 692  | 677  | 859  | 207 | 635  | 442  |
| Plin3         | -0.50062 | 6.642181 | 7.930163 | 0.004861741 | 0.27505833  | 913  | 1160 | 896  | 400 | 804  | 409  |
| Abhd6         | -0.50045 | 5.28639  | 8.387321 | 0.003778474 | 0.236040708 | 794  | 657  | 691  | 204 | 597  | 438  |
| Bet3l         | -0.50041 | 5.667491 | 9.289298 | 0.002304964 | 0.17220005  | 1362 | 1476 | 1378 | 414 | 1082 | 892  |
| lqsec2        | -0.49772 | 4.961038 | 3.891326 | 0.048536078 | 0.790539183 | 495  | 475  | 475  | 176 | 437  | 205  |
| Rgs12         | -0.49514 | 6.571433 | 11.92802 | 0.00055296  | 0.070399334 | 296  | 298  | 328  | 82  | 263  | 189  |
| A2ld1         | -0.49483 | 5.117557 | 9.75393  | 0.001789397 | 0.151577456 | 643  | 702  | 687  | 191 | 662  | 349  |
| Mospd3        | -0.49433 | 5.44945  | 9.725918 | 0.001816876 | 0.151985985 | 317  | 362  | 364  | 106 | 267  | 217  |
| Slc1a3        | -0.49201 | 5.230872 | 5.556631 | 0.018410809 | 0.528108883 | 711  | 652  | 690  | 272 | 540  | 314  |
| D19Erttd737e  | -0.49191 | 5.392344 | 9.235008 | 0.002374314 | 0.175552373 | 563  | 551  | 732  | 183 | 525  | 355  |
| Fn1           | -0.49144 | 6.356955 | 6.912489 | 0.008559575 | 0.370523669 | 301  | 319  | 371  | 133 | 300  | 123  |
| Itga4         | -0.48956 | 3.731045 | 4.033333 | 0.044609738 | 0.763283076 | 172  | 268  | 271  | 67  | 205  | 138  |
| Sv2b          | -0.48882 | 6.571759 | 14.70052 | 0.000126011 | 0.023993469 | 2349 | 2914 | 2644 | 819 | 2141 | 1543 |
| Lrrk1         | -0.48843 | 5.792087 | 5.791075 | 0.016107738 | 0.493649021 | 165  | 191  | 183  | 74  | 120  | 99   |
| Cgnl1         | -0.48799 | 7.087687 | 15.7257  | 7.32227E-05 | 0.015931404 | 1344 | 1286 | 1351 | 428 | 1101 | 748  |
| Vstm2l        | -0.4869  | 6.193843 | 10.38577 | 0.0012699   | 0.123634216 | 2046 | 1888 | 2120 | 646 | 1552 | 1229 |
| Pddc1         | -0.4846  | 5.107609 | 5.29203  | 0.021423232 | 0.564880208 | 423  | 438  | 489  | 155 | 449  | 184  |
| Llph          | -0.48339 | 4.967913 | 4.649244 | 0.031067232 | 0.658484554 | 208  | 338  | 249  | 65  | 187  | 203  |
| Sema3f        | -0.48368 | 4.995584 | 4.956364 | 0.025994804 | 0.608600884 | 232  | 154  | 187  | 64  | 132  | 127  |
| Uba3          | -0.48229 | 5.120152 | 7.187663 | 0.007340654 | 0.340386324 | 495  | 560  | 781  | 179 | 566  | 330  |
| 4732418C07Rik | -0.48092 | 6.26473  | 8.960917 | 0.002758165 | 0.193396506 | 930  | 1161 | 948  | 334 | 653  | 689  |
| Aifm1         | -0.48068 | 5.250957 | 6.643826 | 0.009950005 | 0.399411018 | 405  | 653  | 441  | 182 | 389  | 263  |

|               |          |          |          |             |             |      |      |      |      |      |      |
|---------------|----------|----------|----------|-------------|-------------|------|------|------|------|------|------|
| Fam46a        | -0.48067 | 6.689032 | 6.507523 | 0.010741906 | 0.412925444 | 215  | 219  | 283  | 53   | 184  | 182  |
| Galt          | -0.47954 | 4.068482 | 4.828507 | 0.027992864 | 0.625058265 | 218  | 206  | 234  | 55   | 235  | 112  |
| Fam125a       | -0.47886 | 5.270762 | 6.736017 | 0.009448536 | 0.387374414 | 341  | 457  | 352  | 126  | 353  | 189  |
| Dnajb12       | -0.47652 | 4.722505 | 4.056106 | 0.044011881 | 0.75817424  | 405  | 329  | 288  | 95   | 347  | 181  |
| Fam160b2      | -0.47536 | 5.516381 | 6.996375 | 0.008167496 | 0.359369807 | 433  | 518  | 638  | 132  | 574  | 269  |
| 4933424B01Rik | -0.47508 | 4.668234 | 4.032707 | 0.044626287 | 0.763283076 | 106  | 214  | 218  | 43   | 146  | 124  |
| Thoc4         | -0.47485 | 4.773391 | 5.157081 | 0.023151776 | 0.58316509  | 257  | 269  | 349  | 85   | 215  | 200  |
| Pon2          | -0.47185 | 6.538841 | 11.46117 | 0.000710654 | 0.082651033 | 364  | 437  | 353  | 137  | 327  | 199  |
| Dvl2          | -0.46864 | 4.72354  | 4.463386 | 0.034628787 | 0.687852983 | 190  | 262  | 158  | 79   | 166  | 100  |
| Setd7         | -0.46864 | 6.94456  | 11.55581 | 0.000675379 | 0.078975327 | 1056 | 1692 | 1579 | 458  | 1094 | 899  |
| Zfp385b       | -0.46691 | 4.705478 | 4.674216 | 0.03061868  | 0.657286399 | 586  | 724  | 837  | 214  | 701  | 366  |
| Ccbl1         | -0.46685 | 4.562567 | 4.193136 | 0.040587962 | 0.730176079 | 143  | 167  | 163  | 57   | 94   | 110  |
| Efnb2         | -0.46587 | 5.730832 | 8.817386 | 0.002983738 | 0.199373024 | 409  | 507  | 462  | 125  | 370  | 312  |
| Chgb          | -0.46361 | 6.284589 | 8.730448 | 0.003129396 | 0.205053712 | 1845 | 2261 | 2333 | 677  | 1534 | 1438 |
| Fam59a        | -0.46281 | 4.507124 | 4.448956 | 0.034922581 | 0.689745603 | 239  | 280  | 295  | 59   | 258  | 181  |
| Furin         | -0.46199 | 6.519567 | 9.355657 | 0.002222983 | 0.169009514 | 888  | 829  | 875  | 317  | 769  | 414  |
| C330019G07Rik | -0.46144 | 5.12032  | 7.169172 | 0.007416701 | 0.340386324 | 444  | 458  | 506  | 134  | 377  | 314  |
| Slc24a2       | -0.46073 | 6.966406 | 4.816002 | 0.028196674 | 0.625442919 | 2774 | 3522 | 4021 | 938  | 2667 | 2423 |
| Poldip2       | -0.45824 | 5.375054 | 10.05791 | 0.001516955 | 0.13833339  | 593  | 664  | 601  | 183  | 532  | 383  |
| Slc25a13      | -0.45797 | 5.627121 | 4.748274 | 0.029327702 | 0.642621622 | 180  | 150  | 204  | 72   | 167  | 71   |
| Ppp2r5a       | -0.45783 | 5.144555 | 5.54464  | 0.018537368 | 0.529681287 | 142  | 145  | 168  | 34   | 159  | 86   |
| Senp5         | -0.45483 | 6.097896 | 10.33517 | 0.001305194 | 0.124864452 | 1214 | 1399 | 1344 | 397  | 1140 | 803  |
| Gba           | -0.45482 | 5.458102 | 6.5457   | 0.010513796 | 0.406861212 | 430  | 344  | 418  | 138  | 290  | 254  |
| Dner          | -0.45181 | 6.756299 | 12.3696  | 0.000436381 | 0.059051405 | 2779 | 3017 | 3086 | 1009 | 2594 | 1587 |
| Lin7a         | -0.45136 | 5.426241 | 5.523615 | 0.018761451 | 0.530803048 | 1072 | 1369 | 1082 | 332  | 921  | 822  |
| Sec61a1       | -0.45107 | 7.595994 | 9.37177  | 0.002203526 | 0.168124366 | 1703 | 1359 | 1715 | 514  | 1254 | 1017 |
| Stard10       | -0.44506 | 8.00602  | 11.88718 | 0.000565215 | 0.071485521 | 2847 | 2809 | 2498 | 905  | 2441 | 1500 |
| Uxs1          | -0.44366 | 4.798653 | 4.939191 | 0.026254324 | 0.611068844 | 463  | 600  | 424  | 166  | 356  | 331  |
| Hebp2         | -0.44331 | 7.477163 | 12.2259  | 0.000471307 | 0.062596542 | 1313 | 1465 | 1275 | 398  | 1306 | 765  |
| Pak1ip1       | -0.43929 | 6.379271 | 12.86291 | 0.000335159 | 0.047961082 | 1464 | 1611 | 1464 | 475  | 1318 | 914  |
| Banp          | -0.43703 | 5.349255 | 4.586083 | 0.032232601 | 0.671071484 | 659  | 622  | 448  | 228  | 462  | 305  |
| Ypel2         | -0.43582 | 5.617461 | 4.851929 | 0.027615231 | 0.621772341 | 227  | 301  | 278  | 90   | 269  | 127  |
| Rprm          | -0.43555 | 5.69593  | 6.328431 | 0.011881739 | 0.429066966 | 1485 | 1344 | 1375 | 493  | 1285 | 726  |
| Mrpl34        | -0.43433 | 5.884755 | 6.29265  | 0.012123966 | 0.429066966 | 927  | 832  | 870  | 331  | 824  | 403  |
| Hip1r         | -0.43409 | 6.616377 | 6.989144 | 0.008200554 | 0.360088016 | 1193 | 966  | 1208 | 391  | 891  | 685  |
| Tmem8         | -0.43294 | 4.609333 | 5.579588 | 0.018170997 | 0.524084682 | 546  | 696  | 720  | 211  | 581  | 376  |
| Atp11a        | -0.43028 | 6.140924 | 5.532451 | 0.018666943 | 0.530565321 | 1544 | 1728 | 2008 | 460  | 1312 | 1384 |
| Cd34          | -0.43026 | 4.769977 | 4.997226 | 0.025387982 | 0.603252529 | 411  | 491  | 479  | 147  | 420  | 263  |
| Fbxo18        | -0.42972 | 4.160104 | 3.968413 | 0.046361434 | 0.780526308 | 229  | 289  | 234  | 80   | 241  | 135  |
| 1110007C09Rik | -0.42923 | 6.230562 | 10.19881 | 0.00140531  | 0.131463717 | 862  | 1078 | 1050 | 321  | 993  | 506  |
| BC048546      | -0.42841 | 6.903502 | 11.07702 | 0.000874043 | 0.09594856  | 3112 | 3471 | 3190 | 1005 | 2931 | 1978 |
| Tmem229b      | -0.42806 | 6.653288 | 10.06953 | 0.001507415 | 0.13833339  | 2630 | 2600 | 2742 | 872  | 2084 | 1736 |
| Igln5         | -0.42802 | 4.963434 | 5.974143 | 0.014517132 | 0.467590721 | 777  | 850  | 768  | 266  | 693  | 469  |
| Mfsd1         | -0.42801 | 6.720076 | 10.02176 | 0.001547013 | 0.13985517  | 1118 | 1039 | 1043 | 339  | 1053 | 572  |
| Wipf3         | -0.42796 | 6.986785 | 7.787558 | 0.005260726 | 0.286532113 | 3035 | 3241 | 4019 | 1067 | 3178 | 1989 |
| Rhobtb2       | -0.42594 | 4.804691 | 5.375292 | 0.020423917 | 0.553142638 | 615  | 595  | 591  | 217  | 511  | 335  |
| Mif4gd        | -0.42466 | 5.295264 | 3.859817 | 0.049455732 | 0.798973908 | 117  | 138  | 219  | 43   | 119  | 119  |
| Ift122        | -0.42269 | 5.768149 | 8.761056 | 0.003077307 | 0.203524147 | 954  | 1341 | 1188 | 368  | 1090 | 652  |
| Gyk           | -0.4223  | 5.751856 | 5.332651 | 0.020929531 | 0.558476062 | 275  | 358  | 286  | 83   | 260  | 215  |
| Plbd2         | -0.42136 | 6.175019 | 7.929805 | 0.004862704 | 0.27505833  | 1552 | 1475 | 1649 | 562  | 1233 | 937  |
| Glt25d2       | -0.41993 | 5.135312 | 5.362704 | 0.020571852 | 0.553142638 | 360  | 416  | 493  | 106  | 422  | 267  |
| Pick1         | -0.41795 | 4.886029 | 4.213396 | 0.040105964 | 0.728202461 | 428  | 575  | 575  | 178  | 563  | 231  |
| Cops3         | -0.41791 | 5.806749 | 7.813874 | 0.005184665 | 0.285981922 | 703  | 801  | 955  | 245  | 768  | 492  |
| Pfdn2         | -0.41694 | 6.004306 | 4.748166 | 0.029329542 | 0.642621622 | 841  | 1420 | 1411 | 387  | 1288 | 591  |
| 2310035K24Rik | -0.41676 | 4.492014 | 4.489606 | 0.034101536 | 0.683773541 | 263  | 375  | 326  | 96   | 342  | 163  |
| Hopx          | -0.41652 | 7.826445 | 4.843994 | 0.027742567 | 0.62298708  | 1097 | 1862 | 1359 | 420  | 1383 | 857  |
| Phyhip1       | -0.41565 | 4.685862 | 4.170438 | 0.041135152 | 0.735713998 | 644  | 621  | 618  | 184  | 652  | 350  |
| Zyx           | -0.41503 | 5.519334 | 6.243815 | 0.012462776 | 0.430862859 | 619  | 695  | 633  | 217  | 560  | 392  |
| Tmem132c      | -0.41403 | 5.059834 | 4.537169 | 0.033166393 | 0.67576525  | 138  | 255  | 243  | 71   | 185  | 123  |
| Ust           | -0.41368 | 4.559284 | 4.392378 | 0.036099923 | 0.698343917 | 505  | 615  | 652  | 193  | 593  | 303  |
| Fam98a        | -0.41357 | 4.147836 | 4.136472 | 0.04196854  | 0.746732391 | 293  | 301  | 278  | 102  | 228  | 186  |
| Jag1          | -0.4124  | 6.287081 | 4.86214  | 0.02745227  | 0.621574019 | 271  | 275  | 451  | 91   | 370  | 171  |
| Lrp11         | -0.41211 | 5.357404 | 5.759465 | 0.016400066 | 0.495595262 | 1073 | 1035 | 1177 | 314  | 938  | 761  |
| Slc6a17       | -0.41065 | 4.836993 | 4.041938 | 0.044382831 | 0.761739563 | 634  | 840  | 834  | 202  | 721  | 517  |

|               |          |          |          |             |             |       |       |       |       |       |       |
|---------------|----------|----------|----------|-------------|-------------|-------|-------|-------|-------|-------|-------|
| Polr2b        | -0.40661 | 5.601688 | 7.432656 | 0.006405073 | 0.316223999 | 624   | 609   | 590   | 190   | 574   | 363   |
| Ccz1          | -0.40578 | 6.662536 | 10.07003 | 0.001507004 | 0.13833339  | 1103  | 1419  | 1349  | 453   | 1227  | 669   |
| 9030409G11Rik | -0.40507 | 6.514325 | 6.604264 | 0.010173483 | 0.401983424 | 665   | 711   | 635   | 252   | 610   | 347   |
| Hipk3         | -0.40262 | 6.034363 | 5.233423 | 0.022156891 | 0.574915158 | 402   | 535   | 520   | 156   | 396   | 323   |
| Nqo2          | -0.4009  | 5.145228 | 5.247806 | 0.021974466 | 0.573635513 | 511   | 589   | 628   | 224   | 442   | 341   |
| Tbx3          | -0.40062 | 5.230213 | 4.628091 | 0.031452543 | 0.662165283 | 774   | 1137  | 1136  | 289   | 865   | 711   |
| Rhobtb3       | -0.39933 | 5.144569 | 4.424227 | 0.035432163 | 0.694145031 | 644   | 927   | 1097  | 275   | 833   | 531   |
| Htra1         | -0.39717 | 6.427287 | 5.66181  | 0.017338226 | 0.51243781  | 1483  | 1382  | 1624  | 472   | 1153  | 1082  |
| Dnajc11       | -0.39617 | 5.62893  | 5.444924 | 0.019625264 | 0.542873892 | 514   | 595   | 574   | 153   | 556   | 357   |
| Gmpr          | -0.39599 | 6.765665 | 8.783436 | 0.003039782 | 0.202488976 | 1182  | 1095  | 1049  | 411   | 932   | 654   |
| Pelo          | -0.39525 | 5.233614 | 5.293766 | 0.021401893 | 0.564880208 | 580   | 633   | 607   | 210   | 521   | 371   |
| Dnajb4        | -0.39482 | 5.431708 | 6.957087 | 0.008348783 | 0.362893783 | 635   | 858   | 658   | 238   | 641   | 435   |
| Lrrn1         | -0.39468 | 5.016726 | 4.450606 | 0.034888872 | 0.689745603 | 682   | 976   | 956   | 309   | 790   | 479   |
| Mink1         | -0.3942  | 5.123471 | 3.877253 | 0.048944572 | 0.793588094 | 309   | 359   | 409   | 137   | 277   | 219   |
| Lgi3          | -0.39306 | 6.020917 | 5.672218 | 0.017235646 | 0.511506439 | 1715  | 1513  | 1993  | 577   | 1383  | 1188  |
| Rdbp          | -0.39145 | 5.631583 | 5.863878 | 0.015454709 | 0.483319069 | 452   | 561   | 472   | 144   | 492   | 301   |
| Stam2         | -0.38982 | 5.392178 | 4.971156 | 0.02577341  | 0.60700438  | 321   | 350   | 324   | 102   | 356   | 175   |
| Osbpl9        | -0.38913 | 6.305513 | 7.179236 | 0.007375211 | 0.340386324 | 895   | 867   | 806   | 269   | 747   | 573   |
| Edil3         | -0.38848 | 5.849651 | 6.034532 | 0.014028673 | 0.457184402 | 1227  | 1701  | 1738  | 506   | 1321  | 1007  |
| Gas6          | -0.38797 | 7.053401 | 4.705827 | 0.030060541 | 0.653315766 | 1292  | 1896  | 2106  | 518   | 1991  | 902   |
| Gtf3c6        | -0.38751 | 6.085371 | 6.104688 | 0.013482375 | 0.446287344 | 580   | 699   | 596   | 262   | 522   | 323   |
| Atp2b2        | -0.38641 | 6.810701 | 5.403206 | 0.020099801 | 0.549185963 | 2868  | 2918  | 3238  | 926   | 2790  | 1930  |
| Atf6b         | -0.38569 | 6.076923 | 4.857396 | 0.02752786  | 0.621772341 | 1120  | 1094  | 1120  | 431   | 1162  | 473   |
| Abcg2         | -0.38408 | 5.450239 | 5.780591 | 0.016204092 | 0.493649021 | 736   | 824   | 749   | 280   | 715   | 421   |
| Ahsa1         | -0.38374 | 5.428184 | 5.421878 | 0.019885954 | 0.546444679 | 685   | 841   | 740   | 253   | 825   | 362   |
| Kctd11        | -0.38368 | 5.586181 | 4.083622 | 0.043300747 | 0.752617461 | 208   | 202   | 233   | 76    | 182   | 134   |
| S100b         | -0.38363 | 10.6812  | 6.636584 | 0.009990534 | 0.400291104 | 47979 | 42546 | 41299 | 16699 | 39255 | 24091 |
| Spnb1         | -0.38353 | 6.019232 | 4.366178 | 0.036659124 | 0.700170206 | 1358  | 1576  | 1986  | 590   | 1494  | 907   |
| Ednrb         | -0.38353 | 6.471864 | 7.151442 | 0.007490372 | 0.340724832 | 1022  | 1144  | 1267  | 436   | 850   | 733   |
| Triap1        | -0.38303 | 6.661905 | 6.856983 | 0.008829549 | 0.376191245 | 1351  | 1242  | 1059  | 435   | 1200  | 647   |
| Gdap2         | -0.38157 | 4.864327 | 3.916811 | 0.047805489 | 0.789126837 | 491   | 480   | 478   | 122   | 481   | 335   |
| Slc25a33      | -0.3815  | 4.310894 | 4.175107 | 0.041021983 | 0.734911734 | 424   | 535   | 501   | 153   | 446   | 309   |
| Vamp1         | -0.3797  | 7.747926 | 8.887213 | 0.002871747 | 0.194916462 | 5567  | 5738  | 5877  | 1774  | 4917  | 3980  |
| Mtap7d2       | -0.37944 | 8.705989 | 8.226569 | 0.00412815  | 0.24672577  | 9655  | 12425 | 11747 | 3473  | 9740  | 7733  |
| Med27         | -0.37936 | 5.08929  | 4.678475 | 0.030542856 | 0.657228793 | 563   | 625   | 783   | 257   | 530   | 383   |
| Nefh          | -0.37915 | 10.64622 | 7.580606 | 0.00589996  | 0.300102906 | 40287 | 45083 | 44059 | 13690 | 34490 | 31002 |
| Ccdc92        | -0.37804 | 7.73946  | 7.786618 | 0.005263462 | 0.286532113 | 5197  | 5782  | 6000  | 1771  | 5262  | 3617  |
| Adarb1        | -0.3776  | 5.348323 | 3.895975 | 0.048401929 | 0.790161592 | 742   | 748   | 946   | 256   | 711   | 544   |
| Ak2           | -0.37719 | 6.326938 | 5.100023 | 0.023925528 | 0.590939657 | 530   | 521   | 494   | 169   | 563   | 260   |
| Abhd12        | -0.37562 | 7.624714 | 10.23173 | 0.001380454 | 0.130845159 | 3478  | 3481  | 3661  | 1104  | 3172  | 2376  |
| Tac1          | -0.37537 | 7.010231 | 8.31921  | 0.003922797 | 0.2418421   | 3037  | 3847  | 3507  | 1153  | 2888  | 2314  |
| Itm2c         | -0.37438 | 8.252254 | 7.206357 | 0.007264579 | 0.338321803 | 4913  | 6546  | 5376  | 1830  | 6020  | 2924  |
| Dnm2          | -0.37366 | 6.414357 | 6.297859 | 0.012088389 | 0.429066966 | 457   | 413   | 527   | 188   | 368   | 280   |
| Ermp1         | -0.37327 | 6.760791 | 7.786467 | 0.05263904  | 0.286532113 | 995   | 1047  | 999   | 348   | 779   | 718   |
| Wdr61         | -0.37119 | 6.221713 | 5.617976 | 0.017777169 | 0.517582641 | 656   | 758   | 649   | 262   | 494   | 469   |
| Satb1         | -0.36975 | 6.646716 | 9.811073 | 0.001734643 | 0.149889878 | 1116  | 1335  | 1528  | 451   | 1222  | 797   |
| Foxj2         | -0.36945 | 5.060643 | 5.227588 | 0.022231335 | 0.574915158 | 397   | 504   | 510   | 174   | 443   | 254   |
| Map3k5        | -0.36871 | 5.873733 | 6.175476 | 0.012953304 | 0.438902831 | 416   | 428   | 558   | 159   | 449   | 270   |
| Mrpl4         | -0.36812 | 5.512222 | 5.10776  | 0.023819048 | 0.589069699 | 673   | 709   | 639   | 181   | 629   | 489   |
| Scn1b         | -0.36793 | 7.615279 | 7.162416 | 0.007444684 | 0.340386324 | 5325  | 4937  | 5414  | 1934  | 4917  | 2870  |
| Fam108c       | -0.36792 | 7.094615 | 5.58851  | 0.018078669 | 0.522878739 | 649   | 665   | 782   | 293   | 677   | 311   |
| Zfp365        | -0.3675  | 5.158557 | 4.195712 | 0.040526329 | 0.730176079 | 817   | 1089  | 918   | 295   | 775   | 677   |
| Fbln2         | -0.36731 | 5.353293 | 4.02979  | 0.044703514 | 0.763972048 | 719   | 827   | 1126  | 275   | 870   | 549   |
| Lias          | -0.36718 | 6.176016 | 6.464096 | 0.011007561 | 0.418402432 | 1168  | 1252  | 1108  | 365   | 1135  | 749   |
| Elov15        | -0.36691 | 6.892491 | 9.178914 | 0.002448192 | 0.17856036  | 2051  | 2436  | 2462  | 768   | 2191  | 1403  |
| Fem1a         | -0.36628 | 5.399362 | 4.277038 | 0.038630606 | 0.712844004 | 506   | 568   | 624   | 151   | 589   | 367   |
| Usp10         | -0.36557 | 5.914596 | 4.403446 | 0.035866392 | 0.696481318 | 522   | 486   | 410   | 118   | 518   | 308   |
| 9530068E07Rik | -0.36551 | 6.262039 | 4.473822 | 0.034417916 | 0.686567536 | 703   | 986   | 1098  | 334   | 909   | 489   |
| Ikbkb         | -0.36531 | 5.274238 | 4.000209 | 0.045494617 | 0.773960303 | 341   | 325   | 348   | 93    | 282   | 265   |
| Dapk1         | -0.36511 | 6.952786 | 6.10047  | 0.013514594 | 0.446666658 | 986   | 1215  | 1402  | 339   | 1282  | 725   |
| Trib1         | -0.36393 | 7.715944 | 7.005785 | 0.008124676 | 0.358218299 | 436   | 494   | 571   | 170   | 439   | 322   |
| Mkrn1         | -0.36143 | 7.110772 | 6.47035  | 0.010968891 | 0.418402432 | 1035  | 1097  | 1300  | 451   | 1012  | 628   |
| Cds1          | -0.36131 | 6.367619 | 6.88584  | 0.008688124 | 0.374616583 | 984   | 1106  | 1218  | 350   | 933   | 778   |
| Ablim1        | -0.36131 | 8.789028 | 9.58412  | 0.001962675 | 0.162418922 | 1880  | 2230  | 2752  | 732   | 2179  | 1424  |

|          |          |          |          |             |             |       |       |       |       |       |       |
|----------|----------|----------|----------|-------------|-------------|-------|-------|-------|-------|-------|-------|
| Ogfr1    | -0.35998 | 7.52704  | 6.049103 | 0.013913366 | 0.454263999 | 4064  | 4693  | 4461  | 1381  | 3902  | 3046  |
| Tmod3    | -0.35952 | 7.224406 | 6.268573 | 0.012289806 | 0.429066966 | 498   | 487   | 500   | 195   | 408   | 303   |
| Cerk     | -0.35886 | 6.275889 | 4.80994  | 0.028296024 | 0.627000257 | 1031  | 1405  | 1530  | 358   | 1352  | 874   |
| Hsd1l    | -0.35795 | 5.682591 | 5.23498  | 0.022137061 | 0.574915158 | 858   | 972   | 979   | 298   | 813   | 651   |
| Rapgef1  | -0.35701 | 6.604899 | 5.137253 | 0.023417672 | 0.58316509  | 1183  | 992   | 1123  | 396   | 1175  | 549   |
| Rela     | -0.35622 | 5.940889 | 5.638311 | 0.017572126 | 0.51579438  | 591   | 495   | 532   | 207   | 501   | 303   |
| Cpne6    | -0.35563 | 7.787723 | 6.150103 | 0.013140442 | 0.440389035 | 6092  | 5723  | 5798  | 2059  | 4820  | 4006  |
| Fbxo21   | -0.35532 | 5.444392 | 5.580093 | 0.018165754 | 0.524084682 | 788   | 1061  | 1003  | 300   | 914   | 601   |
| Ythdf3   | -0.35494 | 6.531229 | 5.835969 | 0.015701762 | 0.486937254 | 1011  | 1053  | 1224  | 434   | 1084  | 530   |
| Arl4c    | -0.35286 | 5.520069 | 5.948536 | 0.014729514 | 0.470906708 | 824   | 869   | 863   | 293   | 873   | 472   |
| Apbb3    | -0.35134 | 5.185567 | 4.560649 | 0.032714683 | 0.671717756 | 847   | 885   | 970   | 260   | 977   | 547   |
| Dexi     | -0.351   | 5.897642 | 5.767931 | 0.016321241 | 0.494602561 | 1269  | 1112  | 1193  | 356   | 1219  | 766   |
| Stag1    | -0.35087 | 5.226783 | 4.991251 | 0.025475789 | 0.603252529 | 363   | 436   | 383   | 149   | 357   | 230   |
| Mrps23   | -0.35083 | 6.182256 | 6.87335  | 0.00874905  | 0.375155914 | 1063  | 958   | 976   | 358   | 919   | 612   |
| Tnks1bp1 | -0.35006 | 6.591871 | 6.296795 | 0.012095644 | 0.429066966 | 744   | 837   | 982   | 306   | 830   | 481   |
| Lrrc49   | -0.34844 | 7.376393 | 4.572365 | 0.032491672 | 0.671233175 | 4010  | 4472  | 4436  | 1560  | 4030  | 2518  |
| Alad     | -0.34834 | 5.718604 | 4.299281 | 0.038128492 | 0.709286269 | 419   | 385   | 377   | 114   | 432   | 236   |
| Mef2c    | -0.3454  | 6.128493 | 4.247005 | 0.039319626 | 0.719937241 | 1561  | 1705  | 2093  | 621   | 1512  | 1198  |
| Yipf3    | -0.34502 | 5.817459 | 5.950976 | 0.014709143 | 0.470906708 | 611   | 815   | 627   | 236   | 670   | 403   |
| Hadha    | -0.34318 | 7.45382  | 7.122367 | 0.007612812 | 0.344315852 | 2734  | 2406  | 2686  | 892   | 2357  | 1721  |
| Dennd1b  | -0.34253 | 5.584482 | 3.934321 | 0.047310249 | 0.787260109 | 347   | 354   | 372   | 95    | 360   | 251   |
| Eif2s1   | -0.34211 | 5.570055 | 3.93272  | 0.047355294 | 0.787400694 | 481   | 441   | 492   | 194   | 345   | 314   |
| Ganab    | -0.33975 | 6.395233 | 5.19791  | 0.022614065 | 0.579064072 | 791   | 890   | 1036  | 349   | 909   | 460   |
| Ptprd    | -0.33972 | 6.214805 | 4.110043 | 0.042629285 | 0.750131423 | 606   | 656   | 594   | 242   | 614   | 319   |
| Tars     | -0.33895 | 6.147227 | 5.149466 | 0.02325352  | 0.58316509  | 664   | 726   | 705   | 224   | 598   | 507   |
| Cend1    | -0.3367  | 7.371482 | 6.740351 | 0.009425607 | 0.387374414 | 4022  | 4485  | 4673  | 1572  | 4139  | 2648  |
| Prkag1   | -0.33551 | 6.647243 | 7.162851 | 0.007442881 | 0.340386324 | 1206  | 1253  | 1077  | 420   | 1103  | 733   |
| Cdh1     | -0.33551 | 9.220823 | 8.139072 | 0.004332146 | 0.255371077 | 4151  | 4676  | 4979  | 1476  | 4901  | 2700  |
| Bcas3    | -0.33455 | 5.925267 | 4.338277 | 0.03726461  | 0.704024823 | 1030  | 917   | 1243  | 393   | 989   | 636   |
| Cabp1    | -0.33405 | 7.014053 | 5.377672 | 0.020396077 | 0.553142638 | 3479  | 3481  | 3259  | 1203  | 3228  | 2112  |
| Etl4     | -0.33301 | 6.753517 | 4.318036 | 0.037710432 | 0.706159831 | 773   | 974   | 1298  | 402   | 816   | 634   |
| Tusc2    | -0.32957 | 6.400867 | 6.158427 | 0.013078745 | 0.440389035 | 1735  | 1909  | 1652  | 557   | 1668  | 1219  |
| Chmp1b   | -0.32912 | 6.487465 | 5.170784 | 0.022969849 | 0.580069556 | 540   | 672   | 689   | 243   | 602   | 357   |
| Jak1     | -0.32882 | 9.128729 | 7.693939 | 0.005540656 | 0.289825134 | 7572  | 8552  | 7932  | 2713  | 6900  | 5658  |
| Fgf1     | -0.32807 | 7.842607 | 4.284091 | 0.038470639 | 0.711111914 | 5549  | 5423  | 5787  | 1992  | 5458  | 3347  |
| Maf      | -0.32745 | 7.026052 | 4.636425 | 0.031300142 | 0.660464347 | 2373  | 3408  | 3634  | 901   | 3379  | 2001  |
| Vasp     | -0.32702 | 7.482216 | 7.511891 | 0.0061293   | 0.30740795  | 1258  | 1403  | 1557  | 555   | 1208  | 858   |
| Spock2   | -0.32317 | 7.299468 | 3.998537 | 0.045539772 | 0.773960303 | 3393  | 4467  | 4149  | 1222  | 3216  | 3214  |
| Pptc7    | -0.32243 | 7.525937 | 4.83437  | 0.027897836 | 0.624609624 | 2242  | 1984  | 2724  | 892   | 2194  | 1329  |
| Def8     | -0.3223  | 5.797097 | 4.472517 | 0.03444422  | 0.686567536 | 715   | 640   | 613   | 218   | 699   | 389   |
| Ntrk2    | -0.32162 | 7.468204 | 7.214015 | 0.00723365  | 0.338321803 | 2488  | 2832  | 3386  | 983   | 2662  | 1939  |
| Nkiras1  | -0.32067 | 5.476573 | 4.932285 | 0.026359435 | 0.611068844 | 948   | 1069  | 1143  | 335   | 1042  | 694   |
| Tra2a    | -0.32041 | 5.599692 | 3.893432 | 0.048475259 | 0.790161592 | 465   | 471   | 506   | 172   | 416   | 329   |
| Laptm4b  | -0.32035 | 7.100176 | 7.427723 | 0.006422657 | 0.316223999 | 2151  | 2485  | 2201  | 809   | 2047  | 1510  |
| Timp2    | -0.31913 | 11.3274  | 5.179337 | 0.022857044 | 0.579064072 | 55428 | 61307 | 57176 | 22127 | 51011 | 36326 |
| Purb     | -0.31855 | 8.898474 | 6.420019 | 0.011284093 | 0.420038738 | 3807  | 4419  | 5475  | 1673  | 4700  | 2490  |
| Pik3r1   | -0.31808 | 7.799679 | 8.942288 | 0.002786434 | 0.193396506 | 3469  | 4092  | 4313  | 1374  | 3812  | 2489  |
| Pdrg1    | -0.31718 | 7.238998 | 4.242204 | 0.039430945 | 0.720812417 | 2484  | 2443  | 2038  | 827   | 2148  | 1524  |
| Arl3     | -0.31716 | 7.044732 | 5.071918 | 0.024316468 | 0.595214034 | 2708  | 2456  | 2903  | 958   | 2691  | 1611  |
| Cwc25    | -0.31682 | 5.789951 | 4.136387 | 0.041970666 | 0.746732391 | 623   | 676   | 679   | 278   | 661   | 320   |
| Rexo2    | -0.31641 | 7.740989 | 5.182451 | 0.022816122 | 0.579064072 | 3234  | 3986  | 3515  | 1384  | 3608  | 1905  |
| Fstl1    | -0.31513 | 10.49699 | 7.121305 | 0.007617324 | 0.344315852 | 33552 | 37484 | 38162 | 12368 | 34026 | 24355 |
| R3hdm2   | -0.31468 | 6.955593 | 5.612758 | 0.017830174 | 0.518424343 | 949   | 1199  | 1436  | 400   | 1167  | 762   |
| Wdtdc1   | -0.3139  | 5.784642 | 5.523697 | 0.018760567 | 0.530803048 | 561   | 586   | 656   | 198   | 595   | 389   |
| Pgd      | -0.31315 | 7.008613 | 7.045032 | 0.007948539 | 0.354080252 | 838   | 816   | 865   | 290   | 801   | 549   |
| Sfrp5    | -0.31136 | 7.15662  | 4.683181 | 0.030459304 | 0.657228793 | 3063  | 3747  | 4517  | 1360  | 3918  | 2107  |
| Ddx47    | -0.31129 | 6.270706 | 5.702719 | 0.016938655 | 0.506887471 | 820   | 981   | 935   | 333   | 975   | 489   |
| Usf2     | -0.31115 | 8.053986 | 4.291137 | 0.03831154  | 0.710000942 | 3190  | 2722  | 2957  | 1130  | 3220  | 1500  |
| Crbn     | -0.31108 | 6.145904 | 6.416995 | 0.011303329 | 0.420038738 | 1456  | 1797  | 1561  | 600   | 1457  | 1016  |
| Slc25a11 | -0.31031 | 6.238116 | 3.920629 | 0.047697043 | 0.789126837 | 1032  | 951   | 962   | 326   | 814   | 757   |
| Gmcl1    | -0.31006 | 5.856453 | 3.910968 | 0.047971972 | 0.789126837 | 646   | 840   | 953   | 284   | 879   | 445   |
| H2afj    | -0.3087  | 5.801781 | 3.901485 | 0.048243459 | 0.789653935 | 433   | 507   | 558   | 173   | 487   | 316   |
| Psmc4    | -0.30866 | 6.627284 | 4.302029 | 0.038066931 | 0.709286246 | 1452  | 1383  | 1388  | 392   | 1573  | 941   |
| Sacm1l   | -0.30654 | 6.451479 | 5.952191 | 0.014699007 | 0.470906708 | 1318  | 1568  | 1656  | 507   | 1438  | 1020  |

|               |          |          |          |             |             |       |       |       |       |       |       |
|---------------|----------|----------|----------|-------------|-------------|-------|-------|-------|-------|-------|-------|
| Tyro3         | -0.30643 | 6.356616 | 4.051744 | 0.044125742 | 0.759527579 | 1035  | 1041  | 1004  | 415   | 966   | 588   |
| Lancl1        | -0.30625 | 6.793614 | 4.619079 | 0.031618212 | 0.663057945 | 1343  | 1376  | 1274  | 468   | 1322  | 835   |
| Pbx1          | -0.30299 | 7.806229 | 4.442604 | 0.035052737 | 0.690654475 | 1559  | 2023  | 2290  | 660   | 2194  | 1081  |
| Golim4        | -0.30275 | 6.651566 | 4.978264 | 0.02566773  | 0.6062205   | 1017  | 1321  | 1500  | 395   | 1214  | 918   |
| Usp4          | -0.30251 | 6.15387  | 4.99601  | 0.025405829 | 0.603252529 | 453   | 618   | 563   | 213   | 513   | 323   |
| Arap2         | -0.29616 | 7.583157 | 4.46825  | 0.034530338 | 0.686784085 | 1783  | 1683  | 1736  | 655   | 1416  | 1243  |
| Sgms1         | -0.29595 | 5.932444 | 4.134782 | 0.042010473 | 0.746732391 | 475   | 626   | 600   | 205   | 517   | 379   |
| Sod2          | -0.29591 | 6.606777 | 5.0334   | 0.024863047 | 0.600939511 | 896   | 951   | 1052  | 335   | 1065  | 547   |
| Lman1         | -0.29563 | 7.098669 | 5.042876 | 0.024727401 | 0.599616062 | 1149  | 1008  | 1163  | 403   | 1186  | 628   |
| Sh3gl2        | -0.29547 | 7.67439  | 6.441534 | 0.011148234 | 0.41872495  | 2627  | 2864  | 3069  | 1101  | 2664  | 1753  |
| Extl3         | -0.29444 | 6.048178 | 3.959291 | 0.046613321 | 0.781708664 | 1028  | 982   | 1285  | 403   | 958   | 761   |
| Enah          | -0.29388 | 7.903459 | 5.359345 | 0.020611511 | 0.553142638 | 4843  | 5583  | 6530  | 1937  | 4840  | 4175  |
| Crnkl1        | -0.29358 | 5.978761 | 3.851609 | 0.049698307 | 0.799812338 | 516   | 511   | 416   | 183   | 494   | 278   |
| Cbara1        | -0.29349 | 6.915406 | 4.917915 | 0.026579576 | 0.612954074 | 1376  | 1518  | 1554  | 454   | 1528  | 1023  |
| Snx8          | -0.29219 | 6.717619 | 4.820636 | 0.028120962 | 0.625442919 | 416   | 480   | 445   | 151   | 442   | 296   |
| Tex261        | -0.29161 | 6.754387 | 5.153825 | 0.02319523  | 0.58316509  | 924   | 1086  | 1244  | 376   | 1139  | 653   |
| Nceh1         | -0.29076 | 5.858417 | 4.514919 | 0.033600486 | 0.67948957  | 1264  | 1485  | 1495  | 483   | 1317  | 988   |
| Cnih4         | -0.29074 | 6.632013 | 3.951241 | 0.046836809 | 0.784844843 | 946   | 849   | 852   | 355   | 900   | 484   |
| Ppp2r2b       | -0.29021 | 6.996683 | 5.081615 | 0.024180836 | 0.592568192 | 2948  | 3239  | 3690  | 1257  | 3342  | 1878  |
| 1110008P14Rik | -0.28885 | 6.924911 | 3.944724 | 0.047018571 | 0.785443766 | 2704  | 2293  | 2011  | 763   | 2450  | 1567  |
| Atp1a1        | -0.28835 | 11.10697 | 5.280156 | 0.021569811 | 0.567354599 | 48756 | 41955 | 47021 | 16815 | 46651 | 28207 |
| Ubl5          | -0.28816 | 8.110408 | 5.733227 | 0.016646868 | 0.501644289 | 2724  | 2847  | 2973  | 958   | 3002  | 1802  |
| Rcc2          | -0.28671 | 7.04893  | 4.663636 | 0.030807892 | 0.657286399 | 1318  | 1854  | 1576  | 545   | 1742  | 915   |
| Bod1          | -0.28483 | 6.257737 | 4.413663 | 0.035652203 | 0.694145031 | 718   | 958   | 828   | 324   | 707   | 572   |
| Ubac1         | -0.2836  | 5.960715 | 3.857073 | 0.049536679 | 0.798973908 | 1152  | 1072  | 1156  | 461   | 983   | 724   |
| Ndel1         | -0.28227 | 6.683121 | 4.439278 | 0.035121103 | 0.6913684   | 1468  | 2058  | 1581  | 551   | 1778  | 1126  |
| Zcchc6        | -0.28197 | 6.702254 | 4.047361 | 0.044240453 | 0.760893348 | 722   | 680   | 837   | 269   | 724   | 490   |
| Psmc2         | -0.28142 | 8.439741 | 5.646857 | 0.017486688 | 0.514697105 | 5303  | 5855  | 5996  | 1988  | 5257  | 4064  |
| Gabra1        | -0.27964 | 6.649995 | 4.094904 | 0.043012681 | 0.751185748 | 2572  | 2589  | 2653  | 812   | 2697  | 1833  |
| Sdha          | -0.27942 | 7.263249 | 5.778764 | 0.016220945 | 0.493649021 | 2243  | 2535  | 2503  | 852   | 2243  | 1709  |
| Tbcel         | -0.27874 | 6.466864 | 3.978854 | 0.046074891 | 0.779361121 | 1593  | 1643  | 1795  | 555   | 1621  | 1196  |
| Kcnb1         | -0.27858 | 6.467244 | 4.91833  | 0.026573187 | 0.612954074 | 2020  | 2234  | 2568  | 773   | 2196  | 1576  |
| Stx12         | -0.27804 | 6.972732 | 6.373855 | 0.011581374 | 0.42523009  | 1957  | 2107  | 2129  | 728   | 2077  | 1340  |
| Thsd7a        | -0.27748 | 6.670733 | 4.563408 | 0.032662019 | 0.671717756 | 2521  | 2560  | 2849  | 1011  | 2422  | 1741  |
| Zdhhc3        | -0.27743 | 6.193234 | 5.212337 | 0.022427175 | 0.578055343 | 1084  | 1132  | 1052  | 359   | 1078  | 766   |
| Smg7          | -0.27635 | 7.764302 | 3.963663 | 0.046492433 | 0.781569653 | 3143  | 2964  | 2878  | 1155  | 3027  | 1794  |
| Eif1b         | -0.27556 | 8.169394 | 4.085874 | 0.043243089 | 0.752617461 | 6881  | 7075  | 6784  | 2535  | 7123  | 4259  |
| Ndufa10       | -0.27452 | 8.011833 | 4.183577 | 0.040817466 | 0.732898399 | 4889  | 4298  | 4677  | 1559  | 4438  | 3339  |
| Ubl4          | -0.27431 | 6.203808 | 3.921382 | 0.047675684 | 0.789126837 | 832   | 917   | 767   | 338   | 728   | 562   |
| Epb4.1        | -0.27267 | 6.98935  | 4.580337 | 0.032340858 | 0.671233175 | 715   | 788   | 693   | 250   | 675   | 538   |
| Rab3gap1      | -0.26656 | 7.096749 | 5.51131  | 0.018893891 | 0.532733953 | 1261  | 1313  | 1420  | 517   | 1356  | 793   |
| Sh3bp5l       | -0.26575 | 7.031526 | 5.786335 | 0.016151226 | 0.493649021 | 1591  | 1586  | 1636  | 601   | 1608  | 1018  |
| Efr3a         | -0.26504 | 6.795481 | 5.088688 | 0.024082408 | 0.591685293 | 1305  | 1543  | 1692  | 570   | 1402  | 1019  |
| Nfatc3        | -0.26443 | 7.324117 | 4.203694 | 0.040336024 | 0.730176079 | 768   | 1044  | 856   | 323   | 952   | 532   |
| Eps15         | -0.26299 | 6.543807 | 4.893571 | 0.026956875 | 0.617682769 | 1452  | 1756  | 1873  | 649   | 1672  | 1054  |
| Tom1l2        | -0.2616  | 7.394133 | 5.062618 | 0.024447287 | 0.597057701 | 3229  | 3407  | 3493  | 1223  | 3239  | 2321  |
| Idh3a         | -0.26058 | 6.836121 | 4.603913 | 0.031899065 | 0.666204354 | 2047  | 2417  | 2255  | 701   | 2475  | 1506  |
| Onecut2       | -0.25928 | 7.752759 | 3.975071 | 0.046178495 | 0.779758933 | 4874  | 5432  | 6490  | 1938  | 5378  | 3978  |
| Cdc37l1       | -0.25806 | 7.027351 | 4.876906 | 0.027218368 | 0.620371191 | 2098  | 2287  | 2210  | 769   | 2280  | 1453  |
| Rora          | -0.25623 | 7.852727 | 5.141315 | 0.023362948 | 0.58316509  | 917   | 938   | 1022  | 338   | 981   | 639   |
| Oxr1          | -0.25603 | 8.358467 | 3.908379 | 0.048045927 | 0.789126837 | 1834  | 2248  | 2239  | 652   | 2029  | 1639  |
| Cdk16         | -0.25236 | 7.192495 | 4.232564 | 0.039655489 | 0.723036818 | 2277  | 2863  | 3008  | 923   | 2558  | 2013  |
| Nefl          | -0.25202 | 11.41623 | 4.13119  | 0.042099727 | 0.746732391 | 65451 | 72785 | 74106 | 24274 | 65708 | 53341 |
| Mtus1         | -0.25096 | 7.205547 | 4.598984 | 0.031990904 | 0.666973143 | 1080  | 1307  | 1329  | 480   | 1206  | 797   |
| Psmc3         | -0.25064 | 8.360333 | 4.635865 | 0.031310357 | 0.660464347 | 3926  | 4890  | 4560  | 1693  | 4823  | 2596  |
| Ube3b         | -0.24663 | 6.711615 | 3.960903 | 0.046568707 | 0.781569653 | 1585  | 1811  | 2089  | 665   | 1775  | 1261  |
| Tmem65        | -0.24459 | 6.598744 | 4.517696 | 0.033545979 | 0.67948957  | 1183  | 1353  | 1542  | 504   | 1310  | 933   |
| Rab3d         | -0.23731 | 8.030933 | 3.89361  | 0.048470145 | 0.790161592 | 1341  | 1270  | 1416  | 486   | 1489  | 834   |
| Sec31a        | -0.23189 | 7.013891 | 3.843126 | 0.049950314 | 0.803236887 | 1358  | 1575  | 1606  | 528   | 1424  | 1148  |
| Nfia          | -0.22951 | 8.646096 | 5.138978 | 0.023394411 | 0.58316509  | 6382  | 7421  | 7673  | 2564  | 7701  | 4689  |
| Ttc1          | -0.22918 | 7.035023 | 3.916047 | 0.047827204 | 0.789126837 | 2042  | 2459  | 2432  | 852   | 2273  | 1614  |
| Dnajc8        | -0.21995 | 8.712465 | 4.265695 | 0.038889349 | 0.715165148 | 3727  | 4036  | 3817  | 1537  | 3971  | 2454  |

**Table S7. miR-183C target genes in the TG of SNS-CKO strain.**

|               | log2FC   | logCPM   | LR       | PValue      | FDR      | WT1 | WT2  | WT3  | WT4 | SNS-CKO1 | SNS-CKO2 | SNS-CKO3 |
|---------------|----------|----------|----------|-------------|----------|-----|------|------|-----|----------|----------|----------|
| Alk           | 4.763251 | 0.997144 | 12.31975 | 0.00044819  | 0.705017 | 0   | 0    | 0    | 0   | 1        | 4        | 4        |
| Wnt2          | 3.27212  | 3.713093 | 5.037166 | 0.024809044 | 1        | 0   | 0    | 0    | 0   | 3        | 0        | 0        |
| Grhl2         | 3.10056  | 5.435743 | 21.30568 | 3.9157E-06  | 0.028174 | 1   | 1    | 0    | 1   | 3        | 16       | 3        |
| Pyroxd2       | 2.339075 | 0.637894 | 6.08841  | 0.013607148 | 1        | 1   | 1    | 0    | 0   | 1        | 5        | 3        |
| Ky            | 2.012463 | -0.03292 | 4.576543 | 0.032412543 | 1        | 4   | 3    | 0    | 0   | 13       | 5        | 4        |
| Kcnj14        | 1.517935 | 1.270612 | 4.451155 | 0.034877653 | 1        | 14  | 2    | 0    | 11  | 9        | 31       | 20       |
| Mpv17l        | 0.912426 | 2.953134 | 6.301274 | 0.012065126 | 1        | 28  | 42   | 35   | 35  | 65       | 85       | 49       |
| Nova2         | 0.87369  | 2.540211 | 5.741963 | 0.016564272 | 1        | 28  | 34   | 29   | 21  | 52       | 61       | 41       |
| Zkscan17      | 0.860446 | 3.000774 | 5.973242 | 0.014524553 | 1        | 27  | 14   | 11   | 16  | 28       | 43       | 23       |
| Gria1         | 0.856213 | 3.28212  | 5.260411 | 0.021815871 | 1        | 36  | 56   | 39   | 27  | 73       | 72       | 66       |
| Abcd1         | 0.815319 | 3.740933 | 7.228286 | 0.00717637  | 1        | 35  | 58   | 41   | 45  | 77       | 105      | 56       |
| Slc25a1       | 0.806006 | 6.688861 | 33.58675 | 6.81554E-09 | 0.000123 | 393 | 408  | 368  | 366 | 712      | 718      | 574      |
| Zfp36         | 0.760423 | 5.195642 | 4.177013 | 0.040975868 | 1        | 14  | 27   | 5    | 8   | 21       | 27       | 20       |
| Casp2         | 0.729204 | 4.107749 | 4.770462 | 0.028952054 | 1        | 22  | 17   | 7    | 11  | 20       | 30       | 21       |
| Insig2        | 0.714522 | 5.033879 | 8.213422 | 0.004158166 | 1        | 75  | 86   | 91   | 53  | 134      | 147      | 95       |
| Map3k3        | 0.704376 | 5.062255 | 13.14296 | 0.000288602 | 0.586926 | 54  | 71   | 60   | 32  | 90       | 94       | 79       |
| Phf13         | 0.622382 | 4.207486 | 6.260983 | 0.012342573 | 1        | 32  | 39   | 48   | 38  | 52       | 85       | 46       |
| Zcchc14       | 0.607889 | 3.610004 | 4.788597 | 0.02864876  | 1        | 40  | 37   | 30   | 31  | 47       | 54       | 55       |
| 2410016O06Rik | 0.602914 | 4.718502 | 6.154163 | 0.013110314 | 1        | 56  | 64   | 45   | 46  | 77       | 74       | 85       |
| Spry4         | 0.557554 | 2.638308 | 4.148016 | 0.041683326 | 1        | 35  | 41   | 35   | 30  | 48       | 66       | 42       |
| Tgfb1         | 0.537148 | 5.441946 | 6.02934  | 0.01406999  | 1        | 38  | 45   | 31   | 30  | 48       | 60       | 48       |
| Cdyl2         | 0.489115 | 3.781238 | 4.650594 | 0.031042804 | 1        | 63  | 86   | 74   | 61  | 99       | 137      | 66       |
| Map2k3        | 0.482087 | 6.409921 | 7.199936 | 0.007290618 | 1        | 61  | 53   | 56   | 84  | 91       | 97       | 78       |
| Cacnb1        | 0.471412 | 4.795604 | 5.37694  | 0.020404639 | 1        | 139 | 211  | 192  | 163 | 259      | 286      | 188      |
| Itga3         | 0.45997  | 6.607641 | 5.237623 | 0.022103449 | 1        | 121 | 138  | 137  | 131 | 207      | 193      | 143      |
| Gap43         | 0.418973 | 7.425221 | 4.741665 | 0.029440571 | 1        | 934 | 1235 | 1115 | 954 | 1404     | 1611     | 1213     |
| Cep170b       | 0.383124 | 7.104357 | 8.058923 | 0.004528009 | 1        | 256 | 270  | 303  | 220 | 328      | 438      | 266      |
| Kdm6a         | 0.365418 | 4.810481 | 4.964838 | 0.02586774  | 1        | 76  | 95   | 53   | 55  | 86       | 94       | 87       |
| Myadm         | 0.360315 | 5.594049 | 5.336025 | 0.020889051 | 1        | 282 | 295  | 286  | 246 | 331      | 456      | 286      |
| Ccdc50        | 0.356301 | 6.265366 | 5.05092  | 0.024612863 | 1        | 177 | 254  | 182  | 196 | 234      | 291      | 244      |
| Ehd1          | 0.353881 | 6.72476  | 5.972607 | 0.014529788 | 1        | 138 | 153  | 153  | 158 | 188      | 226      | 163      |
| Yipf4         | 0.350781 | 5.351106 | 5.128846 | 0.023531365 | 1        | 154 | 165  | 157  | 147 | 209      | 244      | 146      |
| Vps36         | 0.350155 | 5.583673 | 4.160437 | 0.04137873  | 1        | 111 | 122  | 94   | 98  | 111      | 162      | 131      |
| Ddhd1         | 0.34311  | 5.22648  | 5.984518 | 0.014431987 | 1        | 198 | 215  | 166  | 143 | 230      | 260      | 194      |
| Rarg          | 0.332151 | 8.127643 | 5.000894 | 0.025334232 | 1        | 196 | 168  | 179  | 133 | 190      | 242      | 203      |
| Foxo3         | 0.32971  | 6.333536 | 5.586507 | 0.018099355 | 1        | 183 | 231  | 215  | 165 | 250      | 266      | 226      |
| Samd12        | 0.327291 | 5.901981 | 4.586844 | 0.032218286 | 1        | 243 | 283  | 225  | 213 | 293      | 372      | 243      |
| Ppp3r1        | 0.315657 | 7.733055 | 5.356853 | 0.020640989 | 1        | 857 | 976  | 951  | 822 | 1118     | 1294     | 948      |
| Gng12         | 0.313765 | 6.722468 | 5.326487 | 0.021003682 | 1        | 140 | 160  | 164  | 163 | 194      | 225      | 165      |
| Lcor          | 0.307707 | 6.386707 | 4.065448 | 0.043769079 | 1        | 176 | 156  | 138  | 165 | 194      | 213      | 180      |
| Fyn           | 0.268435 | 5.919639 | 5.003538 | 0.025295562 | 1        | 390 | 434  | 385  | 345 | 393      | 569      | 436      |
| 2310022B05Rik | 0.246041 | 6.762892 | 4.563041 | 0.032669021 | 1        | 245 | 275  | 249  | 252 | 300      | 329      | 274      |
| Ldlr          | 0.230994 | 8.384465 | 4.310689 | 0.037873617 | 1        | 524 | 558  | 509  | 510 | 652      | 669      | 522      |



**Table S8. miR-183C target genes in the TG of MS-CKO strain**

|          | logFC    | fc              | logCPM   | LR       | Pvalue      | FDR      | WT1 | WT2 | WT3 | WT4 | WT5 | MS-CKO1 | MS-CKO2 | MS-CKO3 | MS-CKO4 | MS-CKO5 |
|----------|----------|-----------------|----------|----------|-------------|----------|-----|-----|-----|-----|-----|---------|---------|---------|---------|---------|
| Ankrd52  | 0.571507 | <b>1.486075</b> | 3.198218 | 4.63995  | 0.031235905 | 1        | 38  | 35  | 32  | 57  | 48  | 49      | 44      | 52      | 66      | 56      |
| Ap1s3    | 3.681468 | <b>12.83017</b> | 4.470898 | 10.72423 | 0.001057414 | 0.392181 | 0   | 0   | 0   | 0   | 0   | 5       | 0       | 1       | 0       | 1       |
| Arhgef37 | 0.792966 | <b>1.732633</b> | 4.515096 | 8.591185 | 0.003377942 | 0.584254 | 20  | 15  | 8   | 20  | 15  | 25      | 21      | 16      | 32      | 23      |
| Arid5b   | 0.318608 | <b>1.247126</b> | 7.382408 | 3.869055 | 0.049184215 | 1        | 235 | 216 | 255 | 249 | 350 | 255     | 339     | 291     | 245     | 286     |
| Cdv3     | 0.502886 | <b>1.417045</b> | 5.753538 | 8.659901 | 0.003252889 | 0.579336 | 65  | 72  | 126 | 106 | 79  | 82      | 94      | 90      | 180     | 91      |
| Cdyl2    | 0.40683  | <b>1.32577</b>  | 3.781238 | 4.893834 | 0.026952765 | 1        | 64  | 63  | 82  | 117 | 92  | 105     | 115     | 118     | 87      | 53      |
| Cpm      | 1.004152 | <b>2.005764</b> | 6.715549 | 15.74284 | 7.25619E-05 | 0.159588 | 19  | 5   | 15  | 19  | 10  | 32      | 20      | 13      | 40      | 12      |
| Ctdspl   | 0.355317 | <b>1.279266</b> | 6.364332 | 6.733025 | 0.009464395 | 0.931074 | 105 | 101 | 135 | 150 | 111 | 174     | 124     | 135     | 144     | 85      |
| Cxadr    | 0.574645 | <b>1.489311</b> | 6.319607 | 5.781452 | 0.01619616  | 1        | 12  | 23  | 34  | 10  | 12  | 17      | 15      | 33      | 31      | 20      |
| Dagla    | 0.478684 | <b>1.393472</b> | 3.433676 | 4.086463 | 0.043228003 | 1        | 48  | 40  | 59  | 67  | 49  | 35      | 64      | 60      | 68      | 80      |
| Dpp8     | 0.353859 | <b>1.277974</b> | 5.822675 | 5.878003 | 0.015331204 | 1        | 216 | 162 | 282 | 294 | 159 | 188     | 261     | 243     | 224     | 269     |
| Epha3    | 3.0724   | <b>8.411717</b> | -0.53998 | 6.611307 | 0.010133329 | 0.943727 | 1   | 0   | 1   | 0   | 0   | 6       | 3       | 0       | 3       | 6       |
| Fam160a2 | 0.350927 | <b>1.27538</b>  | 5.220051 | 5.319093 | 0.021092992 | 1        | 137 | 68  | 144 | 98  | 107 | 108     | 118     | 139     | 124     | 115     |
| Gid4     | 0.412398 | <b>1.330896</b> | 5.55091  | 10.52249 | 0.001179304 | 0.403928 | 135 | 139 | 205 | 251 | 227 | 199     | 203     | 243     | 230     | 204     |
| Gpr39    | 3.470855 | <b>11.08744</b> | 1.85626  | 8.554106 | 0.003447439 | 0.590595 | 0   | 0   | 0   | 0   | 0   | 6       | 0       | 0       | 0       | 0       |
| Grlh2    | 2.731065 | <b>6.639456</b> | 5.435743 | 8.599805 | 0.00336199  | 0.584254 | 0   | 0   | 1   | 0   | 0   | 0       | 4       | 0       | 4       | 1       |
| Irf6     | 0.644096 | <b>1.562759</b> | 7.435745 | 6.605153 | 0.010168408 | 0.943727 | 13  | 7   | 21  | 12  | 21  | 21      | 34      | 13      | 10      | 21      |
| Jade2    | 0.249004 | <b>1.188386</b> | 5.15291  | 4.148825 | 0.041663422 | 1        | 143 | 107 | 167 | 150 | 116 | 164     | 136     | 133     | 157     | 106     |
| Kcnk10   | 0.421194 | <b>1.339035</b> | 3.694793 | 5.326276 | 0.021006221 | 1        | 83  | 76  | 96  | 107 | 98  | 123     | 115     | 128     | 91      | 76      |
| Mast4    | 0.473108 | <b>1.388097</b> | 7.918613 | 12.75263 | 0.000355509 | 0.274974 | 105 | 57  | 127 | 134 | 91  | 99      | 108     | 141     | 141     | 112     |
| Mcmbp    | 0.245098 | <b>1.185173</b> | 5.574388 | 3.851397 | 0.049704582 | 1        | 113 | 75  | 131 | 112 | 84  | 116     | 120     | 104     | 108     | 75      |
| Mrv1     | 0.90423  | <b>1.871545</b> | 1.388283 | 4.734936 | 0.029555941 | 1        | 18  | 7   | 9   | 10  | 13  | 13      | 19      | 11      | 35      | 16      |
| Myb      | 1.649466 | <b>3.137175</b> | 2.1592   | 4.404996 | 0.035833818 | 1        | 0   | 0   | 2   | 0   | 2   | 0       | 5       | 0       | 5       | 2       |
| Nhlrc3   | 1.847769 | <b>3.599431</b> | 0.835202 | 4.421084 | 0.035497469 | 1        | 3   | 0   | 0   | 0   | 0   | 1       | 0       | 2       | 7       | 1       |
| Nptx1    | 0.27269  | <b>1.208058</b> | 6.035924 | 6.193574 | 0.012821501 | 1        | 406 | 389 | 667 | 820 | 471 | 522     | 662     | 544     | 652     | 419     |
| Nt5dc3   | 0.465338 | <b>1.380641</b> | 4.86018  | 10.89673 | 0.00096334  | 0.380847 | 166 | 154 | 274 | 230 | 165 | 249     | 243     | 238     | 246     | 183     |
| Onecut1  | 0.490874 | <b>1.405296</b> | 3.09934  | 5.52373  | 0.018760214 | 1        | 74  | 34  | 53  | 71  | 39  | 64      | 73      | 70      | 72      | 48      |
| Prr15l   | 1.819018 | <b>3.52841</b>  | 1.718841 | 4.976927 | 0.025687579 | 1        | 0   | 2   | 0   | 0   | 2   | 0       | 0       | 0       | 12      | 2       |
| Pygo2    | 0.280663 | <b>1.214753</b> | 5.979636 | 5.189519 | 0.022723508 | 1        | 201 | 153 | 343 | 287 | 206 | 284     | 233     | 297     | 236     | 170     |
| Rftn1    | 0.938247 | <b>1.916199</b> | 1.446897 | 5.601    | 0.017950229 | 1        | 9   | 6   | 19  | 6   | 11  | 15      | 19      | 21      | 17      | 12      |
| Rhpn2    | 1.204084 | <b>2.303909</b> | 2.973708 | 4.149141 | 0.041655642 | 1        | 0   | 4   | 0   | 1   | 5   | 2       | 9       | 0       | 5       | 5       |
| Rims3    | 0.301665 | <b>1.232566</b> | 5.382683 | 6.038745 | 0.013995229 | 1        | 245 | 286 | 430 | 488 | 295 | 339     | 365     | 415     | 334     | 347     |
| Ss18     | 0.394661 | <b>1.314634</b> | 5.096285 | 5.92813  | 0.014901049 | 1        | 50  | 54  | 75  | 61  | 73  | 83      | 60      | 78      | 77      | 56      |
| Stag1    | 0.334736 | <b>1.261147</b> | 5.314926 | 4.490716 | 0.034079398 | 1        | 114 | 66  | 105 | 141 | 91  | 138     | 109     | 82      | 133     | 93      |
| Syne2    | 0.278218 | <b>1.212696</b> | 7.990027 | 4.039793 | 0.044439277 | 1        | 228 | 118 | 270 | 270 | 247 | 224     | 213     | 212     | 268     | 238     |
| Tmem178b | 0.250889 | <b>1.189941</b> | 5.064478 | 4.236688 | 0.039559264 | 1        | 218 | 165 | 281 | 311 | 225 | 225     | 237     | 237     | 282     | 225     |
| Zcchc14  | 0.528393 | <b>1.442322</b> | 3.610003 | 5.333665 | 0.020917357 | 1        | 28  | 37  | 41  | 52  | 32  | 45      | 62      | 45      | 59      | 26      |
| Zdhhc17  | 0.291377 | <b>1.223808</b> | 5.185676 | 5.679081 | 0.017168356 | 1        | 214 | 203 | 299 | 316 | 247 | 244     | 283     | 287     | 281     | 237     |
| Zdhhc5   | 0.499617 | <b>1.413838</b> | 6.163521 | 6.501661 | 0.010777377 | 0.95735  | 49  | 47  | 83  | 104 | 49  | 55      | 106     | 74      | 76      | 80      |
| Zfp322a  | 0.283168 | <b>1.216864</b> | 5.330954 | 5.987834 | 0.014404879 | 1        | 151 | 139 | 207 | 239 | 173 | 155     | 217     | 185     | 209     | 173     |

**Table S9. miR-183C target genes in the TG of miR-183C KO strain.**

|               | log2FC   | logCPM    | LR       | PValue      | FDR         | WT1  | WT2  | WT3  | KO1  | KO2   | KO3  |
|---------------|----------|-----------|----------|-------------|-------------|------|------|------|------|-------|------|
| Grem1         | 5.884219 | -1.516145 | 4.842448 | 0.027767457 | 0.62298708  | 0    | 0    | 0    | 4    | 7     | 8    |
| Rd3           | 5.5858   | -0.394397 | 8.522267 | 0.003508272 | 0.225999933 | 0    | 0    | 0    | 0    | 10    | 9    |
| 5730559C18Rik | 4.992312 | 4.208334  | 15.96325 | 6.45841E-05 | 0.014627289 | 0    | 0    | 0    | 8    | 0     | 2    |
| Ccdc88c       | 4.897153 | 0.612969  | 11.72676 | 0.000616079 | 0.074890147 | 0    | 0    | 0    | 2    | 5     | 3    |
| Irx2          | 4.812347 | 0.27136   | 7.730967 | 0.005428166 | 0.289802085 | 0    | 0    | 0    | 6    | 0     | 0    |
| Cdsn          | 3.850083 | 3.314134  | 6.399717 | 0.011413853 | 0.421959559 | 0    | 0    | 0    | 4    | 0     | 0    |
| Gdnf          | 2.237524 | 1.354751  | 6.364049 | 0.011645552 | 0.426858101 | 0    | 4    | 0    | 2    | 14    | 2    |
| Grhl2         | 2.025769 | 5.037748  | 20.13768 | 7.20629E-06 | 0.003298949 | 0    | 12   | 3    | 0    | 42    | 13   |
| Pax6          | 2.002671 | 7.376403  | 15.96391 | 6.45615E-05 | 0.014627289 | 0    | 7    | 2    | 4    | 11    | 15   |
| Prr15l        | 1.878842 | 1.854081  | 6.21414  | 0.012673388 | 0.433666095 | 2    | 11   | 7    | 1    | 18    | 43   |
| Arsj          | 1.794172 | 1.814089  | 7.651246 | 0.005673313 | 0.294405785 | 4    | 5    | 5    | 4    | 18    | 19   |
| Dgkk          | 1.740272 | 2.509731  | 17.34675 | 3.1143E-05  | 0.00943765  | 61   | 39   | 80   | 79   | 245   | 171  |
| Slc1a1        | 1.588348 | 5.941951  | 47.25489 | 6.23303E-12 | 2.6822E-08  | 68   | 54   | 71   | 57   | 321   | 134  |
| 2610018G03Rik | 1.559135 | 2.354186  | 4.909268 | 0.026712955 | 0.61417846  | 0    | 10   | 6    | 3    | 34    | 7    |
| D3Bwg0562e    | 1.541863 | 2.647607  | 17.65493 | 2.64827E-05 | 0.00852643  | 56   | 83   | 84   | 88   | 270   | 171  |
| Slc25a1       | 1.396849 | 7.409823  | 77.1076  | 1.61893E-18 | 3.48328E-14 | 1371 | 1550 | 1387 | 1637 | 4463  | 3049 |
| Nox4          | 1.379541 | 1.504443  | 5.842953 | 0.015639557 | 0.486272706 | 8    | 8    | 4    | 3    | 22    | 20   |
| B4galnt1      | 1.373513 | 5.016262  | 44.8545  | 2.12232E-11 | 7.61065E-08 | 271  | 375  | 360  | 383  | 1042  | 665  |
| Nova1         | 1.243484 | 2.026995  | 6.163845 | 0.013038748 | 0.440389035 | 45   | 59   | 61   | 75   | 158   | 68   |
| Sv2c          | 1.18594  | 5.891348  | 6.077751 | 0.013689492 | 0.44968413  | 393  | 1789 | 436  | 686  | 3201  | 1249 |
| Ccdc14        | 1.176649 | 1.829349  | 4.653245 | 0.030994893 | 0.658325037 | 24   | 15   | 19   | 12   | 33    | 61   |
| Nova2         | 1.153359 | 2.975271  | 12.66628 | 0.000372309 | 0.052016864 | 82   | 108  | 147  | 102  | 346   | 172  |
| Cacna2d2      | 1.062124 | 6.378794  | 17.71396 | 2.56735E-05 | 0.008498322 | 1202 | 678  | 1554 | 876  | 3798  | 1580 |
| Klhl8         | 1.048649 | 3.874682  | 10.76905 | 0.001032117 | 0.105246569 | 142  | 125  | 112  | 122  | 358   | 166  |
| Mpv17l        | 1.004846 | 2.306796  | 5.782517 | 0.016186342 | 0.493649021 | 55   | 72   | 67   | 76   | 94    | 110  |
| Nck2          | 0.972307 | 4.607676  | 14.63405 | 0.000130535 | 0.024422481 | 51   | 36   | 57   | 35   | 118   | 80   |
| Cx3cl1        | 0.920696 | 4.615334  | 11.76339 | 0.000604072 | 0.074269844 | 55   | 56   | 95   | 46   | 220   | 72   |
| Lrch2         | 0.909468 | 2.984243  | 7.36243  | 0.006660071 | 0.32129615  | 85   | 41   | 76   | 62   | 144   | 97   |
| Slc22a21      | 0.879361 | 3.077283  | 5.022639 | 0.02501801  | 0.602257311 | 25   | 45   | 16   | 22   | 87    | 26   |
| Myadm         | 0.852915 | 5.721288  | 20.00361 | 7.72959E-06 | 0.003393711 | 578  | 569  | 837  | 524  | 1740  | 716  |
| Ppm1f         | 0.852244 | 4.533228  | 10.8321  | 0.000997554 | 0.102886204 | 312  | 323  | 343  | 242  | 553   | 593  |
| Samd12        | 0.842632 | 2.607414  | 4.996243 | 0.025402401 | 0.603252529 | 40   | 88   | 52   | 44   | 128   | 88   |
| Lrrc3         | 0.840543 | 3.09877   | 5.915694 | 0.015006591 | 0.476941025 | 169  | 90   | 106  | 112  | 206   | 189  |
| Chst10        | 0.839672 | 3.943192  | 7.32095  | 0.006815538 | 0.326567584 | 178  | 120  | 190  | 105  | 382   | 249  |
| Gng12         | 0.788021 | 6.892978  | 33.3683  | 7.62569E-09 | 1.17196E-05 | 454  | 394  | 443  | 361  | 920   | 510  |
| Npnt          | 0.776712 | 6.769446  | 9.772884 | 0.001771044 | 0.151577456 | 31   | 46   | 35   | 33   | 56    | 60   |
| Vat1          | 0.775364 | 6.271668  | 28.95221 | 7.41861E-08 | 6.65078E-05 | 536  | 685  | 627  | 550  | 1216  | 700  |
| Zfyve26       | 0.76864  | 2.920812  | 4.43563  | 0.035196232 | 0.691683889 | 40   | 38   | 74   | 36   | 144   | 41   |
| Antxr2        | 0.764308 | 3.131643  | 4.394584 | 0.036053248 | 0.698343917 | 89   | 126  | 197  | 83   | 417   | 116  |
| Celff         | 0.745519 | 4.249156  | 10.54927 | 0.001162343 | 0.116320796 | 268  | 344  | 393  | 198  | 757   | 459  |
| Gap43         | 0.739435 | 8.27836   | 16.68942 | 4.40259E-05 | 0.011990654 | 5378 | 6328 | 4584 | 4525 | 10675 | 6268 |
| Nptx2         | 0.731622 | 4.058258  | 9.488509 | 0.002067628 | 0.16661832  | 279  | 290  | 313  | 174  | 634   | 419  |
| Wnt4          | 0.72951  | 7.880735  | 19.53526 | 9.87597E-06 | 0.00386348  | 104  | 97   | 120  | 80   | 247   | 110  |
| Psen2         | 0.722344 | 6.510016  | 18.99416 | 1.31119E-05 | 0.004864062 | 1145 | 1457 | 1469 | 1037 | 2431  | 1799 |
| Uhrf1bp1      | 0.713073 | 3.391685  | 6.199673 | 0.01277739  | 0.43499734  | 81   | 69   | 98   | 52   | 159   | 121  |
| Ldlr          | 0.706982 | 8.620816  | 30.05182 | 4.20654E-08 | 4.30991E-05 | 1957 | 1891 | 2028 | 1420 | 4224  | 2223 |
| Itga3         | 0.697675 | 6.558744  | 26.93471 | 2.10446E-07 | 0.00015933  | 322  | 438  | 396  | 254  | 751   | 515  |
| Abhd13        | 0.683757 | 4.625025  | 8.705659 | 0.003172237 | 0.206829872 | 97   | 163  | 178  | 110  | 300   | 153  |
| Adcy6         | 0.673935 | 4.075444  | 4.324876 | 0.037559152 | 0.706159831 | 90   | 148  | 201  | 89   | 374   | 134  |
| Ptpn9         | 0.629268 | 4.129905  | 6.060572 | 0.013823292 | 0.452009043 | 118  | 210  | 234  | 115  | 347   | 239  |
| Cebpa         | 0.627827 | 4.667934  | 6.126747 | 0.013315162 | 0.442112709 | 81   | 87   | 43   | 36   | 145   | 94   |
| Insig2        | 0.624959 | 4.72272   | 8.05487  | 0.00453815  | 0.261077128 | 168  | 203  | 142  | 104  | 336   | 213  |
| Fnbp1l        | 0.600289 | 5.599456  | 8.341358 | 0.003875263 | 0.239881444 | 132  | 277  | 315  | 144  | 448   | 294  |
| Braf          | 0.592707 | 6.992482  | 19.95016 | 7.94874E-06 | 0.003393711 | 957  | 1021 | 1165 | 612  | 1891  | 1374 |
| Prrx1         | 0.588297 | 5.123936  | 7.291611 | 0.006927732 | 0.330503497 | 67   | 81   | 53   | 35   | 146   | 73   |
| Slc44a2       | 0.586228 | 6.632697  | 17.63151 | 2.68109E-05 | 0.00852643  | 719  | 921  | 884  | 480  | 1461  | 1142 |
| Snx30         | 0.565772 | 4.493714  | 5.308735 | 0.021218756 | 0.5615532   | 198  | 214  | 149  | 157  | 265   | 206  |
| Prkce         | 0.563963 | 8.399661  | 15.08192 | 0.000102945 | 0.02013601  | 5837 | 6247 | 6501 | 4095 | 10769 | 7156 |
| Atp2b4        | 0.563277 | 5.475423  | 8.464495 | 0.003621459 | 0.229174424 | 560  | 597  | 589  | 418  | 967   | 646  |
| Rgs2          | 0.559    | 5.670061  | 8.894757 | 0.002859907 | 0.194727056 | 689  | 709  | 616  | 522  | 1051  | 718  |
| Nkap          | 0.549996 | 5.061553  | 7.924061 | 0.004878165 | 0.27505833  | 243  | 339  | 297  | 226  | 437   | 321  |
| Fam160a2      | 0.541779 | 5.270316  | 10.57514 | 0.001146185 | 0.115239833 | 300  | 309  | 380  | 193  | 641   | 357  |
| Ppp3r1        | 0.53954  | 8.305003  | 15.3765  | 8.80768E-05 | 0.017877937 | 4522 | 4217 | 4458 | 3095 | 8443  | 4007 |
| Ppil1         | 0.534115 | 4.971721  | 4.510382 | 0.033689711 | 0.67948957  | 186  | 180  | 125  | 110  | 369   | 121  |
| Rapgef5       | 0.53361  | 4.202876  | 4.523303 | 0.033436217 | 0.67948957  | 46   | 79   | 51   | 29   | 108   | 73   |
| Morf4l2       | 0.531502 | 4.720721  | 7.514057 | 0.006121933 | 0.30740795  | 206  | 339  | 261  | 161  | 475   | 307  |

|          |          |          |          |             |             |      |      |      |      |       |      |
|----------|----------|----------|----------|-------------|-------------|------|------|------|------|-------|------|
| Ccdc50   | 0.529358 | 6.416571 | 16.15781 | 5.82778E-05 | 0.013779183 | 547  | 679  | 733  | 369  | 1300  | 685  |
| Cep250   | 0.529241 | 4.483382 | 5.541766 | 0.018567833 | 0.529766703 | 198  | 248  | 363  | 142  | 467   | 345  |
| Plekhhm1 | 0.522327 | 4.67719  | 4.332695 | 0.037387005 | 0.704394754 | 83   | 110  | 113  | 43   | 233   | 106  |
| Cdv3     | 0.519501 | 5.583848 | 6.25823  | 0.012361763 | 0.429066966 | 175  | 306  | 233  | 136  | 299   | 360  |
| Fem1b    | 0.516904 | 6.293372 | 16.52762 | 4.79465E-05 | 0.012720219 | 801  | 1027 | 944  | 624  | 1566  | 962  |
| Ppm1     | 0.505502 | 7.504712 | 14.38567 | 0.000148931 | 0.026703391 | 2564 | 2840 | 2969 | 1654 | 4645  | 3309 |
| Zbtb41   | 0.502707 | 4.540929 | 6.555101 | 0.01045839  | 0.406178199 | 244  | 230  | 238  | 115  | 461   | 279  |
| Arid3a   | 0.502472 | 4.987872 | 6.548365 | 0.010498058 | 0.406861212 | 129  | 121  | 159  | 62   | 284   | 148  |
| Ankrd27  | 0.499666 | 5.271027 | 8.091358 | 0.004447683 | 0.258638786 | 546  | 470  | 557  | 367  | 882   | 519  |
| Cacnb1   | 0.498243 | 5.494458 | 6.839445 | 0.008916654 | 0.378444265 | 853  | 928  | 794  | 546  | 1465  | 922  |
| Pgap1    | 0.492993 | 5.427387 | 5.632449 | 0.017630982 | 0.51579438  | 433  | 365  | 402  | 249  | 548   | 531  |
| Sidt2    | 0.489695 | 6.073105 | 6.319368 | 0.011942617 | 0.429066966 | 433  | 448  | 554  | 305  | 835   | 484  |
| Ttyh3    | 0.485176 | 5.524366 | 5.189647 | 0.022721836 | 0.579064072 | 398  | 684  | 777  | 403  | 1160  | 530  |
| Arid5b   | 0.483206 | 6.443287 | 5.193056 | 0.022677312 | 0.579064072 | 258  | 497  | 427  | 191  | 501   | 612  |
| Mal2     | 0.479958 | 9.481706 | 13.74928 | 0.000208901 | 0.034552777 | 747  | 1041 | 995  | 482  | 1649  | 1075 |
| Zfp451   | 0.477854 | 4.446581 | 6.151083 | 0.013133162 | 0.440389035 | 215  | 251  | 293  | 164  | 421   | 258  |
| Shc1     | 0.472262 | 5.380559 | 5.868157 | 0.015417184 | 0.482847354 | 430  | 518  | 642  | 304  | 1108  | 443  |
| Tmem115  | 0.466758 | 4.707742 | 6.458    | 0.011045389 | 0.418402432 | 297  | 278  | 231  | 175  | 434   | 284  |
| Map3k3   | 0.456532 | 5.695212 | 6.088479 | 0.013606614 | 0.448330643 | 315  | 435  | 359  | 259  | 569   | 358  |
| Trpm3    | 0.455897 | 5.801185 | 6.131744 | 0.013277584 | 0.441546373 | 154  | 156  | 166  | 83   | 247   | 200  |
| Ebf3     | 0.451548 | 5.696989 | 5.684973 | 0.017110807 | 0.510618748 | 812  | 1110 | 1195 | 553  | 1879  | 1094 |
| Dhcr24   | 0.44876  | 8.933464 | 16.24191 | 5.57472E-05 | 0.013477045 | 2279 | 2272 | 2454 | 1439 | 4056  | 2270 |
| Inpp5a   | 0.445516 | 5.800637 | 7.367059 | 0.00664295  | 0.321190376 | 426  | 489  | 387  | 237  | 845   | 408  |
| Gprasp2  | 0.442502 | 6.016149 | 9.793294 | 0.001751494 | 0.150740568 | 1238 | 1210 | 1339 | 788  | 1869  | 1412 |
| Rcn2     | 0.429542 | 4.581786 | 4.874996 | 0.027248503 | 0.620400836 | 221  | 245  | 241  | 133  | 414   | 235  |
| Pnpla8   | 0.423161 | 5.366795 | 5.790627 | 0.016111843 | 0.493649021 | 401  | 514  | 547  | 267  | 715   | 584  |
| Gna11    | 0.420551 | 7.181071 | 14.11893 | 0.000171609 | 0.029538632 | 1512 | 1840 | 1632 | 1032 | 2480  | 1760 |
| Fam49b   | 0.415743 | 6.776803 | 10.89356 | 0.00096499  | 0.100789978 | 1190 | 1159 | 1202 | 726  | 2008  | 1108 |
| Mdm4     | 0.411475 | 5.826873 | 9.200149 | 0.002419954 | 0.1771011   | 455  | 419  | 513  | 261  | 702   | 522  |
| Bcl11b   | 0.405549 | 5.242268 | 4.960222 | 0.025936878 | 0.608079186 | 492  | 467  | 477  | 289  | 860   | 414  |
| Gga2     | 0.405224 | 6.172321 | 6.720529 | 0.009530933 | 0.38801464  | 887  | 899  | 943  | 522  | 1562  | 877  |
| Slc35a1  | 0.402776 | 6.195692 | 5.210815 | 0.022446816 | 0.578055343 | 183  | 273  | 208  | 143  | 340   | 211  |
| Wdr82    | 0.402073 | 4.693388 | 4.664914 | 0.030784957 | 0.657286399 | 273  | 282  | 306  | 140  | 454   | 341  |
| Klf7     | 0.390481 | 6.316103 | 7.709835 | 0.005492077 | 0.289825134 | 1210 | 1645 | 1543 | 720  | 2197  | 1770 |
| Nup50    | 0.380866 | 6.447746 | 8.61032  | 0.003342636 | 0.216627007 | 643  | 773  | 694  | 417  | 930   | 805  |
| Plekha3  | 0.373721 | 4.766637 | 4.108664 | 0.042664062 | 0.750131423 | 419  | 376  | 381  | 211  | 611   | 422  |
| Nptx1    | 0.3708   | 6.418344 | 7.377981 | 0.006602724 | 0.319964458 | 1621 | 1669 | 2029 | 1015 | 2640  | 1841 |
| Msn      | 0.343098 | 7.810328 | 4.884034 | 0.027106195 | 0.619784154 | 3876 | 4710 | 4630 | 2501 | 7350  | 3805 |
| Tmem50b  | 0.340845 | 6.813193 | 8.382242 | 0.003789046 | 0.236040708 | 935  | 1032 | 1049 | 515  | 1444  | 1125 |
| Slmo2    | 0.337721 | 5.572119 | 5.851835 | 0.015560814 | 0.485226759 | 399  | 501  | 503  | 235  | 753   | 466  |
| Ipo9     | 0.334672 | 4.991104 | 4.695652 | 0.030239015 | 0.655209118 | 354  | 404  | 425  | 197  | 607   | 414  |
| Zeb1     | 0.333922 | 6.30223  | 5.144402 | 0.023321445 | 0.58316509  | 1423 | 1320 | 1443 | 818  | 2156  | 1274 |
| Kpnb1    | 0.333184 | 6.463935 | 7.783143 | 0.005273597 | 0.286532113 | 896  | 995  | 1049 | 514  | 1580  | 940  |
| Eea1     | 0.333126 | 7.924761 | 8.421763 | 0.003707561 | 0.233935158 | 2954 | 2987 | 3526 | 1647 | 4514  | 3446 |
| Ids      | 0.330327 | 7.492118 | 4.60514  | 0.031876252 | 0.666204354 | 1972 | 2204 | 3022 | 1357 | 3375  | 2418 |
| Baz1b    | 0.329218 | 7.441917 | 7.164405 | 0.007436435 | 0.340386324 | 1138 | 1277 | 1370 | 653  | 1757  | 1404 |
| Ank3     | 0.327225 | 8.44714  | 3.945527 | 0.046996136 | 0.785443766 | 5504 | 5977 | 8201 | 3161 | 11214 | 6255 |
| Ppp2ca   | 0.321611 | 7.951161 | 5.808019 | 0.015953256 | 0.49237727  | 2159 | 2585 | 1930 | 1151 | 3259  | 2357 |
| Bod1l    | 0.320937 | 7.560445 | 5.592484 | 0.018037703 | 0.522878739 | 1811 | 2421 | 2642 | 1131 | 3034  | 2682 |
| Chd2     | 0.31914  | 6.865916 | 5.127431 | 0.02355056  | 0.58579636  | 735  | 948  | 1020 | 448  | 1458  | 867  |
| Zdhhc20  | 0.316186 | 6.530315 | 4.778891 | 0.028810663 | 0.635720257 | 443  | 765  | 650  | 324  | 868   | 650  |
| Erbp2ip  | 0.312482 | 6.741608 | 3.873627 | 0.049050418 | 0.79470542  | 340  | 347  | 353  | 150  | 667   | 295  |
| Syne2    | 0.306547 | 7.703519 | 5.081759 | 0.024178834 | 0.592568192 | 443  | 549  | 568  | 226  | 916   | 488  |
| Syt1     | 0.306144 | 7.822994 | 6.085255 | 0.013631467 | 0.448462765 | 4123 | 5235 | 5128 | 2372 | 7061  | 5123 |
| Sun2     | 0.305206 | 6.49821  | 5.922558 | 0.014948238 | 0.476483392 | 595  | 652  | 766  | 378  | 884   | 697  |
| Nedd4l   | 0.303662 | 7.018708 | 4.09589  | 0.042987599 | 0.751185748 | 1869 | 2392 | 2831 | 1168 | 3568  | 2387 |
| Hook3    | 0.303036 | 7.741428 | 7.8146   | 0.005182581 | 0.285981922 | 1318 | 1514 | 1554 | 781  | 2146  | 1432 |
| Rasa1    | 0.295957 | 7.559866 | 6.159298 | 0.013072307 | 0.440389035 | 2207 | 2075 | 1960 | 1158 | 3004  | 2002 |
| Usp45    | 0.294072 | 5.597373 | 4.297183 | 0.038175557 | 0.709313724 | 374  | 451  | 519  | 226  | 628   | 470  |
| Med1     | 0.291794 | 6.551671 | 4.949256 | 0.026101902 | 0.609781232 | 682  | 986  | 999  | 478  | 1368  | 788  |
| Mycbp2   | 0.290177 | 8.554704 | 6.289141 | 0.012147993 | 0.429066966 | 2977 | 3831 | 4210 | 1785 | 5383  | 3780 |
| Mtss1    | 0.286413 | 6.618115 | 5.717211 | 0.016799393 | 0.504122385 | 903  | 984  | 1169 | 555  | 1468  | 962  |
| Tm9sf4   | 0.285409 | 6.35129  | 4.879116 | 0.027183534 | 0.620371191 | 703  | 693  | 827  | 358  | 1203  | 687  |
| Tmx1     | 0.275901 | 6.923893 | 4.298718 | 0.038141114 | 0.709286269 | 1002 | 989  | 1196 | 619  | 1588  | 879  |
| Clptm1l  | 0.274337 | 6.154851 | 4.20501  | 0.040304739 | 0.730176079 | 582  | 598  | 732  | 321  | 967   | 599  |
| Syncrip  | 0.272792 | 6.660751 | 4.385062 | 0.036255181 | 0.699611189 | 693  | 775  | 833  | 407  | 1003  | 795  |
| Fam126b  | 0.265742 | 7.239384 | 6.304948 | 0.012040142 | 0.429066966 | 1958 | 2269 | 2178 | 1071 | 3217  | 2002 |
| Tmx4     | 0.251695 | 7.071111 | 4.990637 | 0.025484827 | 0.603252529 | 2286 | 2694 | 2717 | 1393 | 3674  | 2270 |

|        |          |          |          |             |             |       |       |       |      |       |       |
|--------|----------|----------|----------|-------------|-------------|-------|-------|-------|------|-------|-------|
| Celf1  | 0.251387 | 6.906991 | 3.96158  | 0.04654999  | 0.781569653 | 1006  | 1044  | 1386  | 634  | 1613  | 1009  |
| Cd47   | 0.25076  | 6.562907 | 4.135509 | 0.041992432 | 0.746732391 | 1193  | 1446  | 1390  | 629  | 2008  | 1303  |
| Rbm25  | 0.243703 | 8.72808  | 3.91128  | 0.047963062 | 0.789126837 | 2532  | 3194  | 3411  | 1516 | 4030  | 3092  |
| Stmn2  | 0.241221 | 9.576853 | 3.885028 | 0.048718451 | 0.791637017 | 15051 | 18468 | 16536 | 8109 | 22620 | 17013 |
| Mef2a  | 0.240004 | 6.951418 | 3.971388 | 0.046279613 | 0.779758933 | 1312  | 1604  | 1560  | 661  | 2241  | 1474  |
| Lrrc58 | 0.228445 | 7.276887 | 3.854001 | 0.049627463 | 0.799812338 | 1692  | 1998  | 2280  | 1050 | 2742  | 1788  |
| Evi5   | 0.22438  | 7.682579 | 4.032652 | 0.044627724 | 0.763283076 | 1961  | 2464  | 2461  | 1094 | 3229  | 2208  |

**Table S10. miR-183C target genes in the cornea of SNS-CKO strain.**

|               | log2FC  | logCPM  | LR    | PValue | FDR      | WT1  | WT2  | WT3 | WT4  | SNS-CKO1 | SNS-CKO2 | SNS-CKO3 |
|---------------|---------|---------|-------|--------|----------|------|------|-----|------|----------|----------|----------|
| Kcnh5         | 4.10648 | 1.675   | 7.513 | 0.0061 | 1        | 0    | 0    | 0   | 0    | 4        | 0        | 1        |
| Stmnd1        | 3.51499 | -0.7086 | 4.34  | 0.0372 | 1        | 0    | 0    | 0   | 0    | 2        | 1        | 0        |
| Mgat4c        | 3.44474 | 2.0635  | 4.86  | 0.0275 | 1        | 0    | 0    | 0   | 0    | 1        | 2        | 0        |
| Ikzf1         | 3.44472 | 1.4863  | 4.738 | 0.0295 | 1        | 0    | 0    | 0   | 0    | 3        | 0        | 0        |
| B3galt1       | 3.3887  | 5.0622  | 4.987 | 0.0255 | 1        | 0    | 0    | 0   | 0    | 1        | 1        | 1        |
| Slc7a14       | 3.38755 | 5.4721  | 5.005 | 0.0253 | 1        | 0    | 0    | 0   | 0    | 1        | 1        | 1        |
| P2rx6         | 2.30325 | 4.0272  | 4.016 | 0.0451 | 1        | 0    | 1    | 0   | 0    | 1        | 2        | 2        |
| Ebf1          | 1.75531 | 7.4255  | 13    | 0.0003 | 0.509334 | 4    | 5    | 2   | 0    | 10       | 8        | 11       |
| Fat3          | 1.62907 | 4.8821  | 4.328 | 0.0375 | 1        | 2    | 0    | 0   | 2    | 6        | 2        | 2        |
| 9330151L19Rik | 1.5256  | 1.828   | 4.826 | 0.028  | 1        | 2    | 6    | 0   | 1    | 5        | 5        | 10       |
| Dusp18        | 1.48233 | 3.47    | 6.891 | 0.0087 | 1        | 6    | 1    | 3   | 1    | 9        | 3        | 13       |
| Rab40b        | 1.31046 | 1.6305  | 4.196 | 0.0405 | 1        | 3    | 8    | 1   | 3    | 7        | 8        | 13       |
| Klh13         | 1.29623 | 4.0357  | 11.5  | 0.0007 | 0.632525 | 6    | 11   | 4   | 5    | 19       | 9        | 21       |
| Hs3st1        | 1.24613 | 2.602   | 6.685 | 0.0097 | 1        | 4    | 11   | 3   | 2    | 10       | 14       | 11       |
| St3gal6       | 1.21675 | 4.2565  | 5.914 | 0.015  | 1        | 4    | 2    | 0   | 7    | 4        | 2        | 18       |
| Lancl3        | 1.20682 | 3.2078  | 4.436 | 0.0352 | 1        | 4    | 2    | 4   | 1    | 7        | 5        | 8        |
| Tmem86a       | 0.95836 | 3.4718  | 4.621 | 0.0316 | 1        | 9    | 10   | 7   | 5    | 8        | 19       | 19       |
| Fam149b       | 0.92849 | 2.8366  | 5.315 | 0.0211 | 1        | 15   | 19   | 17  | 22   | 24       | 16       | 78       |
| Rimbp2        | 0.89603 | 4.6176  | 3.996 | 0.0456 | 1        | 7    | 2    | 2   | 8    | 17       | 3        | 7        |
| Sh3pxd2b      | 0.8226  | 4.5583  | 8.475 | 0.0036 | 1        | 9    | 20   | 14  | 30   | 18       | 28       | 54       |
| Cygb          | 0.77888 | 6.3264  | 5.863 | 0.0155 | 1        | 5    | 25   | 4   | 10   | 21       | 11       | 25       |
| Reep1         | 0.75553 | 6.7262  | 5.984 | 0.0144 | 1        | 13   | 8    | 4   | 21   | 16       | 12       | 32       |
| Tmem170b      | 0.73125 | 3.2092  | 5.547 | 0.0185 | 1        | 24   | 32   | 15  | 33   | 54       | 29       | 44       |
| Ptprg         | 0.67125 | 5.3489  | 15.2  | 1E-04  | 0.302172 | 74   | 139  | 81  | 113  | 113      | 112      | 289      |
| Yod1          | 0.60473 | 3.9501  | 4.362 | 0.0367 | 1        | 33   | 65   | 37  | 69   | 36       | 45       | 177      |
| Sec14l1       | 0.5895  | 5.0192  | 8.531 | 0.0035 | 1        | 40   | 80   | 45  | 86   | 83       | 66       | 140      |
| Gnai3         | 0.56281 | 5.5164  | 7.065 | 0.0079 | 1        | 184  | 330  | 149 | 243  | 227      | 231      | 602      |
| Hes1          | 0.55294 | 7.7531  | 8.201 | 0.0042 | 1        | 1023 | 1560 | 703 | 1337 | 1326     | 1097     | 2916     |
| Pdcd6         | 0.53291 | 5.8925  | 8.928 | 0.0028 | 1        | 176  | 314  | 159 | 275  | 231      | 225      | 606      |
| Dgcr2         | 0.5158  | 5.4434  | 7.565 | 0.006  | 1        | 114  | 172  | 93  | 200  | 149      | 139      | 365      |
| Gabarapl2     | 0.50713 | 6.0681  | 4.385 | 0.0363 | 1        | 69   | 111  | 60  | 119  | 84       | 50       | 295      |
| Cx3cl1        | 0.50474 | 4.2338  | 5.456 | 0.0195 | 1        | 73   | 81   | 47  | 106  | 79       | 79       | 184      |
| Rac1          | 0.49846 | 8.1171  | 9.922 | 0.0016 | 0.88998  | 761  | 1225 | 644 | 1106 | 1075     | 751      | 2414     |
| Anxa3         | 0.49798 | 4.0464  | 4.19  | 0.0407 | 1        | 66   | 113  | 73  | 85   | 124      | 64       | 188      |
| Kdelr2        | 0.4893  | 5.6744  | 3.962 | 0.0465 | 1        | 172  | 248  | 110 | 141  | 166      | 142      | 460      |
| Sowahb        | 0.47809 | 4.2127  | 6.447 | 0.0111 | 1        | 91   | 127  | 81  | 133  | 134      | 107      | 225      |
| Arf4          | 0.46774 | 6.1874  | 5.797 | 0.0161 | 1        | 235  | 351  | 204 | 363  | 292      | 240      | 760      |
| C1ptm1l       | 0.4624  | 5.8949  | 5.11  | 0.0238 | 1        | 199  | 251  | 150 | 206  | 204      | 136      | 594      |
| Tsc1          | 0.4493  | 4.8939  | 4.558 | 0.0328 | 1        | 51   | 82   | 32  | 68   | 63       | 59       | 121      |
| Mta1          | 0.4442  | 5.4058  | 5.59  | 0.0181 | 1        | 142  | 194  | 90  | 126  | 159      | 126      | 303      |
| Elavl1        | 0.44121 | 5.1819  | 5.319 | 0.0211 | 1        | 140  | 203  | 89  | 163  | 160      | 145      | 320      |
| Jade1         | 0.43617 | 5.3747  | 5.687 | 0.0171 | 1        | 130  | 164  | 121 | 189  | 159      | 149      | 340      |
| Pcx           | 0.43427 | 4.7257  | 4.274 | 0.0387 | 1        | 75   | 109  | 50  | 83   | 66       | 77       | 197      |
| Dazap2        | 0.42938 | 7.3884  | 8.501 | 0.0035 | 1        | 593  | 939  | 479 | 768  | 706      | 566      | 1743     |
| Hs2st1        | 0.42564 | 4.4909  | 3.908 | 0.0481 | 1        | 41   | 54   | 34  | 41   | 42       | 62       | 68       |
| Golph3l       | 0.4255  | 4.5232  | 3.915 | 0.0479 | 1        | 78   | 102  | 61  | 60   | 70       | 84       | 165      |
| Tapt1         | 0.41756 | 4.876   | 3.937 | 0.0472 | 1        | 72   | 103  | 56  | 84   | 82       | 78       | 168      |
| Map2k1        | 0.37726 | 5.7389  | 4.748 | 0.0293 | 1        | 180  | 246  | 151 | 222  | 213      | 211      | 376      |
| Sgms2         | 0.3687  | 5.504   | 4.514 | 0.0336 | 1        | 153  | 236  | 133 | 205  | 180      | 151      | 417      |
| Cd164         | 0.35143 | 7.7324  | 5.046 | 0.0247 | 1        | 936  | 1397 | 658 | 1241 | 1049     | 920      | 2260     |
| Rapgef5       | 0.33118 | 6.1301  | 4.404 | 0.0358 | 1        | 246  | 279  | 172 | 225  | 230      | 226      | 457      |
| Azin1         | 0.31842 | 6.5145  | 5.806 | 0.016  | 1        | 180  | 260  | 136 | 266  | 197      | 180      | 445      |
| Map1lc3b      | 0.3089  | 8.2543  | 5.563 | 0.0183 | 1        | 358  | 520  | 314 | 582  | 539      | 383      | 750      |
| Ctsb          | 0.28995 | 8.7305  | 5.075 | 0.0243 | 1        | 582  | 920  | 434 | 723  | 694      | 523      | 1321     |
| Igsf3         | 0.28067 | 7.371   | 3.974 | 0.0462 | 1        | 482  | 875  | 443 | 637  | 568      | 525      | 1227     |
| Sypl          | 0.275   | 7.4836  | 4.231 | 0.0397 | 1        | 822  | 1131 | 670 | 1133 | 883      | 764      | 1976     |
| Ube3c         | 0.27283 | 6.0321  | 3.897 | 0.0484 | 1        | 114  | 247  | 111 | 201  | 182      | 146      | 286      |
| Foxo1         | 0.27017 | 6.3978  | 4.083 | 0.0433 | 1        | 317  | 438  | 223 | 401  | 333      | 287      | 680      |
| Prr13         | 0.26168 | 7.6459  | 4.845 | 0.0277 | 1        | 559  | 844  | 464 | 777  | 671      | 525      | 1288     |
| Klf7          | 0.25981 | 8.7611  | 4.197 | 0.0405 | 1        | 207  | 308  | 162 | 290  | 241      | 233      | 406      |
| Gmfb          | 0.25915 | 7.5787  | 4.201 | 0.0404 | 1        | 318  | 422  | 263 | 361  | 313      | 292      | 692      |
| Paqr8         | 0.2523  | 6.3331  | 4.255 | 0.0391 | 1        | 308  | 413  | 264 | 330  | 325      | 308      | 587      |
| Mbnl1         | 0.24722 | 7.8511  | 4.05  | 0.0442 | 1        | 413  | 691  | 357 | 605  | 456      | 408      | 1075     |

|               |         |        |       |        |   |     |     |     |     |     |     |     |
|---------------|---------|--------|-------|--------|---|-----|-----|-----|-----|-----|-----|-----|
| 2310022B05Rik | 0.20967 | 6.7629 | 3.855 | 0.0496 | 1 | 375 | 640 | 324 | 518 | 464 | 402 | 772 |
|---------------|---------|--------|-------|--------|---|-----|-----|-----|-----|-----|-----|-----|

**Table S11. miR-183C target genes in the cornea of MS-CKO strain.**

|               | log2FC | logCPM | LR     | PValue | FDR   | WT1 | WT2 | WT3 | WT4 | WT5 | MS-CKO1 | MS-CKO2 | MS-CKO3 | MS-CKO4 | MS-CKO5 |
|---------------|--------|--------|--------|--------|-------|-----|-----|-----|-----|-----|---------|---------|---------|---------|---------|
| H2-BI         | 4.1254 | -0.632 | 4.1755 | 0.041  | 0.835 | 0   | 0   | 0   | 0   | 0   | 9       | 0       | 0       | 1       | 0       |
| Grid1         | 4.1057 | 3.0743 | 15.677 | 8E-05  | 0.055 | 0   | 0   | 0   | 0   | 0   | 5       | 0       | 4       | 0       | 2       |
| Slc2a13       | 3.4947 | 1.6849 | 9.1534 | 0.0025 | 0.317 | 0   | 0   | 0   | 0   | 0   | 0       | 0       | 0       | 0       | 7       |
| Kcnj3         | 3.2952 | 4.4333 | 8.762  | 0.0031 | 0.338 | 0   | 0   | 0   | 0   | 0   | 1       | 0       | 0       | 0       | 5       |
| Astn1         | 3.2754 | 3.3011 | 8.5822 | 0.0034 | 0.353 | 0   | 0   | 0   | 0   | 0   | 0       | 6       | 0       | 0       | 0       |
| Pirt          | 3.0632 | 8.0307 | 7.341  | 0.0067 | 0.464 | 0   | 0   | 0   | 0   | 0   | 0       | 0       | 0       | 2       | 3       |
| Grik3         | 3.059  | 1.9567 | 7.1626 | 0.0074 | 0.483 | 0   | 0   | 0   | 0   | 0   | 0       | 0       | 5       | 0       | 0       |
| Slc4a1        | 2.6742 | 0.2104 | 6.912  | 0.0086 | 0.505 | 0   | 2   | 0   | 0   | 0   | 0       | 9       | 3       | 3       | 0       |
| Gm6878        | 2.6324 | -0.128 | 3.9299 | 0.0474 | 0.868 | 0   | 0   | 0   | 0   | 0   | 0       | 3       | 0       | 0       | 1       |
| Nanos1        | 2.5682 | 1.3964 | 6.0271 | 0.0141 | 0.604 | 0   | 0   | 0   | 1   | 0   | 0       | 0       | 8       | 0       | 1       |
| Plcx3         | 2.4443 | 4.3518 | 4.4024 | 0.0359 | 0.811 | 0   | 0   | 0   | 0   | 0   | 0       | 0       | 0       | 2       | 1       |
| Elmo1         | 2.4368 | 3.9687 | 4.3923 | 0.0361 | 0.811 | 0   | 0   | 0   | 0   | 0   | 3       | 0       | 0       | 0       | 0       |
| Slain1        | 2.4346 | 1.314  | 4.0742 | 0.0435 | 0.85  | 0   | 0   | 0   | 0   | 0   | 0       | 0       | 0       | 0       | 3       |
| Tmem198       | 2.4325 | 2.9818 | 6.2986 | 0.0121 | 0.567 | 1   | 0   | 0   | 0   | 0   | 0       | 0       | 6       | 0       | 2       |
| L3mbtl1       | 1.9249 | 1.029  | 7.7597 | 0.0053 | 0.427 | 2   | 2   | 3   | 0   | 0   | 3       | 9       | 9       | 3       | 2       |
| Trim46        | 1.6053 | 3.0118 | 5.5025 | 0.019  | 0.665 | 4   | 0   | 1   | 0   | 0   | 1       | 0       | 2       | 4       | 8       |
| Apoo          | 1.5443 | 1.5823 | 6.7117 | 0.0096 | 0.525 | 3   | 1   | 0   | 6   | 2   | 8       | 24      | 1       | 2       | 3       |
| D630045J12Rik | 1.3068 | 3.4204 | 7.196  | 0.0073 | 0.48  | 6   | 0   | 3   | 1   | 3   | 3       | 15      | 8       | 2       | 4       |
| Lancl3        | 1.2291 | 3.2078 | 6.5498 | 0.0105 | 0.545 | 1   | 3   | 8   | 1   | 1   | 7       | 12      | 8       | 3       | 1       |
| Fgf14         | 1.2241 | 2.7455 | 7.2074 | 0.0073 | 0.478 | 6   | 4   | 13  | 13  | 7   | 5       | 42      | 33      | 9       | 13      |
| Filip1        | 1.1504 | 4.8424 | 4.6581 | 0.0309 | 0.773 | 5   | 3   | 1   | 1   | 0   | 0       | 21      | 0       | 1       | 0       |
| Rab6b         | 1.0795 | 8.8355 | 8.9566 | 0.0028 | 0.324 | 7   | 7   | 5   | 1   | 5   | 16      | 0       | 18      | 4       | 11      |
| Gpr155        | 1.078  | 4.1895 | 8.0819 | 0.0045 | 0.394 | 8   | 4   | 8   | 3   | 1   | 9       | 15      | 14      | 1       | 9       |
| Trib3         | 1.0022 | 1.7691 | 7.9628 | 0.0048 | 0.402 | 15  | 12  | 11  | 13  | 10  | 14      | 43      | 20      | 19      | 20      |
| Kcnc3         | 0.9888 | 6.7981 | 9.4519 | 0.0021 | 0.287 | 16  | 5   | 8   | 2   | 2   | 3       | 35      | 10      | 8       | 6       |
| Ahr           | 0.9038 | 3.0744 | 7.6081 | 0.0058 | 0.437 | 46  | 26  | 35  | 19  | 19  | 56      | 27      | 51      | 33      | 78      |
| Arhgap31      | 0.8911 | 4.4979 | 5.3001 | 0.0213 | 0.696 | 25  | 5   | 8   | 2   | 13  | 12      | 25      | 25      | 15      | 20      |
| Ttc21b        | 0.87   | 2.5131 | 5.42   | 0.0199 | 0.677 | 11  | 10  | 16  | 5   | 3   | 8       | 16      | 10      | 20      | 16      |
| Gprasp2       | 0.8026 | 5.8317 | 8.1322 | 0.0043 | 0.391 | 9   | 10  | 15  | 9   | 10  | 21      | 33      | 19      | 9       | 5       |
| Nrbf2         | 0.7557 | 2.884  | 4.3046 | 0.038  | 0.813 | 18  | 23  | 17  | 23  | 4   | 19      | 23      | 18      | 24      | 38      |
| Sh3pxd2b      | 0.7193 | 4.5583 | 11.342 | 0.0008 | 0.18  | 34  | 48  | 21  | 31  | 9   | 49      | 64      | 48      | 19      | 37      |
| Gab2          | 0.6819 | 4.5415 | 4.5445 | 0.033  | 0.785 | 13  | 22  | 7   | 13  | 8   | 7       | 26      | 14      | 28      | 13      |
| Lmnb2         | 0.6644 | 3.7546 | 11.542 | 0.0007 | 0.171 | 69  | 97  | 88  | 59  | 40  | 96      | 126     | 114     | 43      | 140     |
| Ostm1         | 0.6482 | 4.2969 | 9.2944 | 0.0023 | 0.307 | 42  | 66  | 59  | 63  | 22  | 41      | 119     | 64      | 39      | 103     |
| Gnaz          | 0.6384 | 6.2114 | 4.8519 | 0.0276 | 0.747 | 18  | 15  | 5   | 12  | 1   | 5       | 42      | 8       | 8       | 12      |
| Kctd7         | 0.6102 | 3.5088 | 6.6527 | 0.0099 | 0.536 | 33  | 16  | 32  | 18  | 13  | 24      | 52      | 40      | 21      | 23      |
| Col5a1        | 0.6023 | 4.4851 | 4.1656 | 0.0413 | 0.838 | 54  | 123 | 244 | 102 | 32  | 88      | 266     | 261     | 47      | 108     |

|          |        |        |        |        |       |       |       |       |       |       |       |       |       |       |       |
|----------|--------|--------|--------|--------|-------|-------|-------|-------|-------|-------|-------|-------|-------|-------|-------|
| Cdyl2    | 0.5743 | 3.7812 | 4.7695 | 0.029  | 0.756 | 15    | 23    | 21    | 16    | 7     | 20    | 31    | 37    | 5     | 21    |
| Bnip3    | 0.5223 | 5.8122 | 5.4152 | 0.02   | 0.677 | 33    | 40    | 21    | 21    | 15    | 61    | 32    | 22    | 23    | 30    |
| Zfp592   | 0.5103 | 4.3184 | 7.5343 | 0.0061 | 0.446 | 54    | 90    | 116   | 94    | 40    | 93    | 159   | 107   | 43    | 122   |
| Tmem170b | 0.4956 | 3.2092 | 3.883  | 0.0488 | 0.869 | 26    | 45    | 52    | 44    | 9     | 36    | 66    | 55    | 26    | 39    |
| Mras     | 0.4777 | 6.8429 | 5.7123 | 0.0168 | 0.634 | 40    | 100   | 137   | 37    | 32    | 116   | 112   | 114   | 25    | 67    |
| Slc7a8   | 0.4428 | 4.4525 | 4.3835 | 0.0363 | 0.811 | 97    | 169   | 141   | 167   | 77    | 118   | 192   | 182   | 116   | 187   |
| Fam73b   | 0.4392 | 4.5216 | 4.3401 | 0.0372 | 0.813 | 32    | 64    | 45    | 61    | 27    | 43    | 86    | 31    | 48    | 72    |
| Zfp532   | 0.4318 | 4.8884 | 6.2565 | 0.0124 | 0.575 | 111   | 159   | 173   | 120   | 50    | 109   | 195   | 206   | 86    | 146   |
| Tpm2     | 0.4215 | 6.6972 | 5.4141 | 0.02   | 0.677 | 575   | 1137  | 940   | 740   | 374   | 834   | 848   | 714   | 793   | 953   |
| Ptch1    | 0.4126 | 4.7563 | 4.2684 | 0.0388 | 0.82  | 54    | 77    | 67    | 54    | 34    | 41    | 77    | 108   | 55    | 60    |
| Mapk8ip1 | 0.3975 | 7.1831 | 4.0062 | 0.0453 | 0.858 | 22    | 30    | 35    | 33    | 9     | 30    | 24    | 45    | 27    | 27    |
| Nampt    | 0.3757 | 5.1803 | 8.8338 | 0.003  | 0.332 | 150   | 201   | 194   | 196   | 73    | 199   | 293   | 190   | 95    | 199   |
| Slc39a1  | 0.3712 | 5.113  | 4.9413 | 0.0262 | 0.736 | 193   | 252   | 223   | 192   | 139   | 205   | 375   | 186   | 164   | 267   |
| Dcaf12   | 0.3402 | 6.2115 | 11.82  | 0.0006 | 0.157 | 406   | 497   | 491   | 345   | 175   | 453   | 621   | 483   | 211   | 455   |
| Xbp1     | 0.3351 | 5.8269 | 5.085  | 0.0241 | 0.718 | 287   | 349   | 422   | 251   | 173   | 240   | 467   | 333   | 190   | 493   |
| Tox4     | 0.3182 | 5.0803 | 4.2385 | 0.0395 | 0.823 | 139   | 229   | 196   | 126   | 56    | 162   | 211   | 175   | 82    | 200   |
| Dazap2   | 0.273  | 7.3884 | 5.0252 | 0.025  | 0.722 | 1031  | 1328  | 1300  | 914   | 548   | 897   | 1404  | 1234  | 557   | 1607  |
| Rap2c    | 0.2644 | 5.3315 | 5.0238 | 0.025  | 0.722 | 129   | 159   | 179   | 138   | 92    | 159   | 246   | 157   | 70    | 157   |
| Tmsb4x   | 0.2642 | 12.325 | 4.6248 | 0.0315 | 0.774 | 36652 | 43220 | 44653 | 36924 | 22121 | 35277 | 49614 | 33989 | 24003 | 59386 |
| Mdp1     | 0.2536 | 5.9027 | 5.0504 | 0.0246 | 0.721 | 312   | 405   | 358   | 310   | 164   | 348   | 557   | 400   | 154   | 276   |
| Pcmt1    | 0.2325 | 6.9294 | 4.6564 | 0.0309 | 0.773 | 190   | 287   | 283   | 177   | 125   | 219   | 299   | 241   | 114   | 273   |



**Table S12. miR-183C target genes in the cornea of miR-183C KO train.**

|               | log2FC   | logCPM    | LR       | PValue      | FDR         | WT1 | WT2 | WT3 | KO1 | KO2 | KO3 |
|---------------|----------|-----------|----------|-------------|-------------|-----|-----|-----|-----|-----|-----|
| Mak           | 5.995725 | -0.768916 | 6.099519 | 0.013521871 | 0.376390618 | 0   | 0   | 0   | 6   | 0   | 7   |
| Myrip         | 5.382911 | 1.506843  | 15.27673 | 9.28533E-05 | 0.015564362 | 0   | 0   | 0   | 0   | 11  | 2   |
| Fbxl2         | 5.269457 | 3.691976  | 18.7582  | 1.48384E-05 | 0.004041313 | 0   | 0   | 0   | 1   | 10  | 0   |
| Tagln3        | 5.081802 | 6.733713  | 16.91874 | 3.90145E-05 | 0.008229759 | 0   | 0   | 0   | 0   | 0   | 9   |
| Ubxn10        | 5.037601 | -1.108022 | 4.09973  | 0.042890058 | 0.684586422 | 0   | 0   | 0   | 0   | 13  | 0   |
| Nrn1          | 4.882861 | 7.773578  | 14.87916 | 0.000114622 | 0.018133953 | 0   | 0   | 0   | 2   | 6   | 0   |
| Fibcd1        | 4.741054 | -0.151272 | 7.37113  | 0.006627926 | 0.254200464 | 0   | 0   | 0   | 6   | 0   | 0   |
| Myt1l         | 4.504685 | 6.609825  | 11.28124 | 0.000782943 | 0.068758403 | 0   | 0   | 0   | 6   | 0   | 0   |
| Elavl4        | 4.501532 | 8.809614  | 11.29743 | 0.000776144 | 0.06844061  | 0   | 0   | 0   | 6   | 0   | 0   |
| Cacna1e       | 4.447176 | 0.660783  | 7.43869  | 0.006383633 | 0.250156494 | 0   | 0   | 0   | 5   | 0   | 0   |
| Dgkk          | 4.398428 | 2.509731  | 9.978912 | 0.001583432 | 0.105304624 | 0   | 0   | 0   | 0   | 6   | 0   |
| Tub           | 4.351791 | -0.281715 | 6.31507  | 0.011971602 | 0.348553444 | 0   | 0   | 0   | 0   | 2   | 3   |
| Prss12        | 3.910236 | 4.114798  | 7.291381 | 0.006928619 | 0.25933058  | 0   | 0   | 0   | 0   | 4   | 0   |
| Hoxd8         | 3.790268 | 1.441202  | 10.36403 | 0.001284947 | 0.090943797 | 1   | 0   | 0   | 1   | 14  | 0   |
| Kcnh5         | 3.740489 | 0.867971  | 5.526014 | 0.018735736 | 0.454473608 | 0   | 0   | 0   | 0   | 4   | 0   |
| Gpr22         | 3.732446 | 2.81456   | 13.90779 | 0.000192001 | 0.025927263 | 1   | 0   | 0   | 0   | 12  | 1   |
| Unc5d         | 3.648659 | 1.117715  | 5.354173 | 0.020672732 | 0.481091376 | 0   | 0   | 0   | 3   | 0   | 0   |
| Rundc3b       | 3.107325 | 3.224422  | 8.606602 | 0.003349467 | 0.172079943 | 1   | 0   | 0   | 0   | 8   | 0   |
| Fut9          | 2.884179 | 1.445702  | 19.60133 | 9.54028E-06 | 0.002932408 | 14  | 4   | 7   | 11  | 78  | 34  |
| Avil          | 2.606653 | 7.959145  | 8.521967 | 0.00350885  | 0.1763935   | 2   | 0   | 0   | 0   | 0   | 9   |
| Sox2          | 2.538395 | 4.445089  | 7.857341 | 0.005061477 | 0.220450876 | 0   | 0   | 2   | 0   | 9   | 0   |
| Scn2a1        | 2.483773 | 3.06872   | 8.643283 | 0.003282693 | 0.169784668 | 0   | 1   | 2   | 4   | 0   | 7   |
| Nsg1          | 2.45456  | 4.048026  | 13.558   | 0.000231304 | 0.029103686 | 0   | 5   | 0   | 4   | 16  | 0   |
| Clcn5         | 2.40528  | 3.111664  | 9.667104 | 0.001875968 | 0.119761824 | 5   | 0   | 0   | 4   | 0   | 11  |
| Nova2         | 2.33268  | 2.975271  | 7.701866 | 0.005516377 | 0.230020078 | 0   | 0   | 3   | 3   | 7   | 1   |
| Elmo1         | 2.215123 | 3.755488  | 16.44463 | 5.00917E-05 | 0.009729398 | 4   | 2   | 4   | 5   | 14  | 11  |
| Celsr3        | 2.086823 | 3.733945  | 4.189912 | 0.040665209 | 0.666376723 | 2   | 0   | 0   | 6   | 0   | 0   |
| Coro2b        | 2.047226 | 6.100321  | 23.07888 | 1.55489E-06 | 0.00079655  | 7   | 6   | 2   | 4   | 27  | 10  |
| Pcdh17        | 1.940878 | 5.932583  | 18.00892 | 2.19872E-05 | 0.005378547 | 1   | 13  | 0   | 12  | 15  | 8   |
| Grip1         | 1.923959 | 4.430855  | 35.59714 | 2.42643E-09 | 4.45078E-06 | 57  | 37  | 18  | 44  | 128 | 89  |
| Cdsn          | 1.865646 | 3.314134  | 10.9085  | 0.000957242 | 0.075754905 | 167 | 72  | 86  | 67  | 331 | 294 |
| Trim46        | 1.842892 | 3.554254  | 10.67175 | 0.001087841 | 0.082126241 | 0   | 7   | 5   | 2   | 23  | 6   |
| D630045J12Rik | 1.841322 | 3.437815  | 18.41235 | 1.77901E-05 | 0.00461171  | 10  | 15  | 9   | 16  | 28  | 30  |
| Esrrg         | 1.77696  | 3.391285  | 8.107857 | 0.004407381 | 0.201764262 | 0   | 9   | 0   | 5   | 15  | 2   |
| Slc39a14      | 1.771217 | 1.67146   | 6.199553 | 0.012778261 | 0.361759281 | 1   | 6   | 7   | 15  | 5   | 8   |
| Sv2c          | 1.741765 | 5.891348  | 5.602654 | 0.017933287 | 0.446594836 | 0   | 8   | 0   | 4   | 11  | 4   |
| Plcxd3        | 1.702915 | 4.770777  | 7.295622 | 0.006912285 | 0.25933058  | 0   | 7   | 0   | 0   | 16  | 0   |
| 9330159F19Rik | 1.65587  | 5.489106  | 7.677997 | 0.005589818 | 0.231735126 | 0   | 0   | 8   | 2   | 13  | 2   |
| Robo2         | 1.610326 | 5.490906  | 16.88318 | 3.97524E-05 | 0.008304003 | 22  | 8   | 4   | 3   | 41  | 23  |
| Gria3         | 1.602819 | 3.88974   | 15.24158 | 9.45974E-05 | 0.015656601 | 15  | 8   | 7   | 16  | 23  | 17  |
| Lphn3         | 1.530869 | 2.42231   | 6.455275 | 0.01106234  | 0.333966347 | 20  | 4   | 8   | 6   | 57  | 6   |
| Prkd1         | 1.516851 | 2.537231  | 5.959152 | 0.014641081 | 0.396468879 | 9   | 0   | 8   | 2   | 23  | 8   |
| Tox3          | 1.46694  | 4.208456  | 8.384764 | 0.003783794 | 0.184231678 | 9   | 6   | 0   | 7   | 15  | 5   |
| Bnip3         | 1.404131 | 5.968689  | 25.51819 | 4.38231E-07 | 0.000286867 | 103 | 78  | 104 | 53  | 309 | 143 |
| Sox5          | 1.402133 | 2.565192  | 6.970578 | 0.008286071 | 0.28711827  | 10  | 13  | 7   | 8   | 47  | 5   |
| Sncb          | 1.300131 | 7.117983  | 4.261948 | 0.0389752   | 0.653107798 | 0   | 8   | 0   | 7   | 6   | 0   |
| Rnf157        | 1.220213 | 6.404902  | 8.321772 | 0.00391727  | 0.18940219  | 9   | 6   | 7   | 8   | 24  | 2   |
| Lcp1          | 1.191605 | 5.703614  | 7.599571 | 0.00583822  | 0.238358892 | 71  | 22  | 38  | 10  | 81  | 82  |
| Mmd           | 1.161359 | 2.957801  | 5.854945 | 0.015533342 | 0.412611601 | 16  | 15  | 56  | 29  | 42  | 44  |
| Cntn1         | 1.156595 | 8.946245  | 30.42967 | 3.46192E-08 | 4.13814E-05 | 66  | 35  | 64  | 42  | 158 | 46  |
| Chst1         | 1.014639 | 4.234149  | 5.100103 | 0.023924428 | 0.516306912 | 4   | 20  | 7   | 8   | 23  | 11  |
| Mef2c         | 0.993958 | 6.128493  | 17.65589 | 2.64694E-05 | 0.006399049 | 33  | 39  | 60  | 49  | 69  | 46  |
| Wisp1         | 0.985652 | 3.239455  | 4.379971 | 0.036363621 | 0.631986814 | 63  | 90  | 67  | 21  | 197 | 88  |
| Rnf24         | 0.980306 | 3.758715  | 7.070479 | 0.007836428 | 0.279616235 | 32  | 13  | 21  | 20  | 32  | 26  |
| Aatk          | 0.867533 | 8.915216  | 16.0801  | 6.07188E-05 | 0.011166034 | 72  | 58  | 63  | 50  | 98  | 70  |
| Pdzd4         | 0.866418 | 4.354298  | 5.372774 | 0.020453421 | 0.479255481 | 30  | 25  | 13  | 34  | 45  | 3   |
| Gng5          | 0.865576 | 3.24461   | 5.665791 | 0.017298916 | 0.438868758 | 186 | 70  | 156 | 132 | 253 | 91  |
| Ier5l         | 0.784008 | 2.956932  | 4.040863 | 0.044411113 | 0.693935742 | 72  | 30  | 79  | 68  | 84  | 38  |
| Fyn           | 0.76893  | 6.334412  | 6.360166 | 0.011671064 | 0.344294107 | 23  | 27  | 11  | 20  | 21  | 23  |
| Anxa3         | 0.75456  | 4.035785  | 7.287791 | 0.006942481 | 0.25933058  | 211 | 159 | 216 | 112 | 336 | 184 |
| B4galnt1      | 0.751776 | 5.016262  | 11.637   | 0.000646527 | 0.060219387 | 198 | 81  | 116 | 85  | 245 | 97  |
| Bnc2          | 0.730588 | 3.890631  | 4.551911 | 0.032882025 | 0.603145484 | 22  | 39  | 15  | 22  | 38  | 21  |
| Dnajb9        | 0.728872 | 3.107109  | 4.209925 | 0.040188104 | 0.662225126 | 57  | 55  | 49  | 41  | 112 | 30  |
| Slc16a13      | 0.660032 | 3.187751  | 3.884645 | 0.048729559 | 0.719255682 | 199 | 123 | 144 | 92  | 335 | 85  |
| Ankrd27       | 0.619722 | 5.271027  | 11.07438 | 0.000875288 | 0.073565219 | 285 | 210 | 180 | 163 | 376 | 138 |
| Cacna2d1      | 0.617079 | 7.040251  | 7.499491 | 0.006171644 | 0.246570902 | 58  | 55  | 34  | 57  | 66  | 20  |

|          |          |          |          |             |             |       |      |      |      |       |      |
|----------|----------|----------|----------|-------------|-------------|-------|------|------|------|-------|------|
| Zeb2     | 0.609941 | 6.816022 | 8.463185 | 0.003624066 | 0.179666854 | 119   | 129  | 89   | 82   | 136   | 99   |
| Slc35d1  | 0.575186 | 3.401966 | 3.888424 | 0.048620023 | 0.719107082 | 129   | 108  | 155  | 90   | 181   | 98   |
| Dusp1    | 0.548482 | 4.995334 | 6.796925 | 0.0091315   | 0.302732425 | 376   | 497  | 412  | 289  | 610   | 318  |
| Slc35e4  | 0.547299 | 4.212664 | 4.514072 | 0.033617119 | 0.60795906  | 128   | 98   | 106  | 70   | 119   | 101  |
| Dip2a    | 0.526233 | 4.371574 | 5.288841 | 0.021462503 | 0.489181367 | 142   | 107  | 147  | 105  | 198   | 68   |
| Rnf208   | 0.508854 | 7.110025 | 8.439918 | 0.003670728 | 0.180513584 | 1036  | 566  | 642  | 377  | 1087  | 552  |
| Dtna     | 0.492458 | 6.087402 | 4.124039 | 0.042278032 | 0.679353346 | 54    | 82   | 87   | 36   | 111   | 59   |
| Sidt2    | 0.48589  | 6.073105 | 6.4088   | 0.011355612 | 0.338872879 | 1057  | 684  | 878  | 419  | 1139  | 715  |
| Magi1    | 0.485358 | 6.487522 | 7.343513 | 0.006730519 | 0.25630768  | 119   | 113  | 154  | 76   | 204   | 77   |
| Parm1    | 0.484455 | 8.280592 | 6.753734 | 0.00935517  | 0.305441321 | 1047  | 1077 | 904  | 499  | 1433  | 798  |
| Tns1     | 0.480867 | 7.16856  | 12.03257 | 0.00052279  | 0.051400206 | 236   | 191  | 240  | 144  | 303   | 147  |
| Tpm2     | 0.46765  | 7.326003 | 5.50409  | 0.018972049 | 0.458654616 | 2770  | 3001 | 3187 | 1755 | 5056  | 1708 |
| Prr13    | 0.466843 | 8.074541 | 7.780133 | 0.00528239  | 0.223292522 | 3723  | 2377 | 2876 | 1413 | 4713  | 2015 |
| Slc39a5  | 0.465075 | 5.290979 | 6.653096 | 0.009898366 | 0.315049168 | 197   | 146  | 194  | 97   | 261   | 121  |
| Slc25a1  | 0.456443 | 7.409823 | 8.300272 | 0.003963915 | 0.190374082 | 1313  | 1097 | 1249 | 625  | 1623  | 932  |
| Tgfb1    | 0.437545 | 8.837142 | 7.695231 | 0.005536691 | 0.230420604 | 10348 | 8009 | 8573 | 5912 | 11476 | 5650 |
| Rab34    | 0.43091  | 4.728428 | 3.96257  | 0.046522637 | 0.704916231 | 313   | 243  | 243  | 165  | 314   | 188  |
| Pde4d    | 0.404579 | 5.255696 | 4.194906 | 0.040545594 | 0.665938162 | 195   | 114  | 128  | 96   | 166   | 94   |
| Msn      | 0.388616 | 7.810328 | 5.19707  | 0.022624988 | 0.502142899 | 324   | 322  | 276  | 165  | 366   | 228  |
| Prkce    | 0.380874 | 8.399661 | 5.588775 | 0.018075929 | 0.447036419 | 453   | 258  | 249  | 174  | 368   | 224  |
| Slc39a1  | 0.375948 | 5.571921 | 5.45384  | 0.019525358 | 0.466713643 | 952   | 516  | 726  | 454  | 951   | 402  |
| Sobp     | 0.375638 | 5.579599 | 4.02103  | 0.044936273 | 0.699601188 | 148   | 137  | 140  | 90   | 217   | 62   |
| Prkca    | 0.338533 | 7.179291 | 4.029655 | 0.044707072 | 0.698053233 | 353   | 298  | 337  | 210  | 492   | 139  |
| Gyk      | 0.334953 | 5.751856 | 3.888755 | 0.048610432 | 0.719107082 | 1146  | 674  | 938  | 699  | 1026  | 437  |
| Zfc3h1   | 0.334712 | 5.85405  | 4.730167 | 0.029638004 | 0.573463395 | 945   | 632  | 675  | 575  | 844   | 355  |
| Dab2ip   | 0.312138 | 6.578239 | 5.046749 | 0.024672183 | 0.525070906 | 1053  | 837  | 843  | 555  | 950   | 581  |
| Vps36    | 0.297004 | 5.63755  | 4.926747 | 0.026444046 | 0.541054773 | 924   | 614  | 729  | 490  | 879   | 389  |
| Ssh2     | 0.292401 | 6.356147 | 4.431376 | 0.035284043 | 0.625347173 | 1198  | 670  | 841  | 612  | 942   | 477  |
| Atp6v1c1 | 0.285636 | 6.457112 | 4.652201 | 0.031013757 | 0.583807525 | 554   | 417  | 471  | 263  | 584   | 276  |
| Rtn4     | 0.239339 | 9.160383 | 3.930177 | 0.047426944 | 0.711106713 | 1705  | 1011 | 1337 | 715  | 1636  | 707  |

**Table S13. GO\_BP analysis of miR-183C targets in SNS-CKO TG up genes**

| Category              | Term                                                                       | Count    | %               | PValue          | Genes                                   | List Total | Pop Hits   | Pop Total    | ld              | Enrichm         | Bonferroni      | Benjamini       | FDR |
|-----------------------|----------------------------------------------------------------------------|----------|-----------------|-----------------|-----------------------------------------|------------|------------|--------------|-----------------|-----------------|-----------------|-----------------|-----|
| GOTERM_BP_I GO        | 7507 heart development                                                     | 5        | 11.90476        | 0.002284        | MAP2K3, PPP3R1, ITGA3, TGFBR1, KDM6A    | 38         | 306        | 20240        | 8.70313         | 0.715635        | 0.728945        | 0.728945        |     |
| <b>GOTERM_BP_I GO</b> | <b>1904646 cellular response to beta-amyloid</b>                           | <b>3</b> | <b>7.142857</b> | <b>0.002801</b> | <b>CACNB1, FYN, FOXO3</b>               | <b>38</b>  | <b>43</b>  | <b>20240</b> | <b>37.16034</b> | <b>0.786186</b> | <b>0.728945</b> | <b>0.728945</b> |     |
| GOTERM_BP_I GO        | 10628 positive regulation of gene expression                               | 6        | 14.28571        | 0.004869        | GRIA1, RARG, ITGA3, LDLR, TGFBR1, KDM6A | 38         | 612        | 20240        | 5.221878        | 0.931727        | 0.728945        | 0.728945        |     |
| GOTERM_BP_I GO        | 46777 protein autophosphorylation                                          | 4        | 9.52381         | 0.005301        | ALK, MAP3K3, FYN, TGFBR1                | 38         | 194        | 20240        | 10.98209        | 0.946257        | 0.728945        | 0.728945        |     |
| GOTERM_BP_I GO        | 10730 negative regulation of hydrogen peroxide biosynthetic process        | 2        | 4.761905        | 0.009108        | MPV17L, FYN                             | 38         | 5          | 20240        | 213.0526        | 0.993476        | 0.8406          | 0.8406          |     |
| <b>GOTERM_BP_I GO</b> | <b>71560 cellular response to transforming growth factor beta stimulus</b> | <b>3</b> | <b>7.142857</b> | <b>0.00917</b>  | <b>FYN, WNT2, TGFBR1</b>                | <b>38</b>  | <b>79</b>  | <b>20240</b> | <b>20.22652</b> | <b>0.993698</b> | <b>0.8406</b>   | <b>0.8406</b>   |     |
| <b>GOTERM_BP_I GO</b> | <b>1843 neural tube closure</b>                                            | <b>3</b> | <b>7.142857</b> | <b>0.014934</b> | <b>RARG, GRHL2, KDM6A</b>               | <b>38</b>  | <b>102</b> | <b>20240</b> | <b>15.66563</b> | <b>0.999745</b> | <b>0.983687</b> | <b>0.983687</b> |     |
| <b>GOTERM_BP_I GO</b> | <b>60070 canonical Wnt signaling pathway</b>                               | <b>3</b> | <b>7.142857</b> | <b>0.017817</b> | <b>FOXO3, WNT2, KDM6A</b>               | <b>38</b>  | <b>112</b> | <b>20240</b> | <b>14.26692</b> | <b>0.999949</b> | <b>0.983687</b> | <b>0.983687</b> |     |
| GOTERM_BP_I GO        | 34383 low-density lipoprotein particle clearance                           | 2        | 4.761905        | 0.019931        | EHD1, LDLR                              | 38         | 11         | 20240        | 96.84211        | 0.999984        | 0.983687        | 0.983687        |     |
| GOTERM_BP_I GO        | 7169 transmembrane receptor protein tyrosine kinase signaling pathway      | 3        | 7.142857        | 0.020597        | ALK, FYN, SAMD12                        | 38         | 121        | 20240        | 13.20574        | 0.999989        | 0.983687        | 0.983687        |     |
| GOTERM_BP_I GO        | 38066 p38MAPK cascade                                                      | 2        | 4.761905        | 0.021723        | MAP2K3, ZFP36                           | 38         | 12         | 20240        | 88.77193        | 0.999994        | 0.983687        | 0.983687        |     |
| GOTERM_BP_I GO        | 48333 mesodermal cell differentiation                                      | 2        | 4.761905        | 0.021723        | ITGA3, KDM6A                            | 38         | 12         | 20240        | 88.77193        | 0.999994        | 0.983687        | 0.983687        |     |
| GOTERM_BP_I GO        | 60317 cardiac epithelial to mesenchymal transition                         | 2        | 4.761905        | 0.025299        | WNT2, TGFBR1                            | 38         | 14         | 20240        | 76.09023        | 0.999999        | 0.983687        | 0.983687        |     |
| GOTERM_BP_I GO        | 16310 phosphorylation                                                      | 5        | 11.90476        | 0.026707        | ALK, MAP2K3, MAP3K3, FYN, TGFBR1        | 38         | 626        | 20240        | 4.254246        | 1               | 0.983687        | 0.983687        |     |
| GOTERM_BP_I GO        | 60487 lung epithelial cell differentiation                                 | 2        | 4.761905        | 0.028862        | PPP3R1, GRHL2                           | 38         | 16         | 20240        | 66.57895        | 1               | 0.983687        | 0.983687        |     |
| GOTERM_BP_I GO        | 35264 multicellular organism growth                                        | 3        | 7.142857        | 0.029929        | RARG, GRHL2, KDM6A                      | 38         | 148        | 20240        | 10.79659        | 1               | 0.983687        | 0.983687        |     |
| GOTERM_BP_I GO        | 6468 protein phosphorylation                                               | 5        | 11.90476        | 0.030405        | ALK, MAP2K3, MAP3K3, FYN, TGFBR1        | 38         | 652        | 20240        | 4.084598        | 1               | 0.983687        | 0.983687        |     |
| GOTERM_BP_I GO        | 43065 positive regulation of apoptotic process                             | 4        | 9.52381         | 0.036725        | RARG, CASP2, FOXO3, TGFBR1              | 38         | 402        | 20240        | 5.299817        | 1               | 1               | 1               |     |
| GOTERM_BP_I GO        | 60324 face development                                                     | 2        | 4.761905        | 0.039475        | RARG, GRHL2                             | 38         | 22         | 20240        | 48.42105        | 1               | 1               | 1               |     |
| GOTERM_BP_I GO        | 70542 response to fatty acid                                               | 2        | 4.761905        | 0.042987        | INSIG2, FOXO3                           | 38         | 24         | 20240        | 44.38596        | 1               | 1               | 1               |     |
| GOTERM_BP_I GO        | 32331 negative regulation of chondrocyte differentiation                   | 2        | 4.761905        | 0.042987        | RARG, TGFBR1                            | 38         | 24         | 20240        | 44.38596        | 1               | 1               | 1               |     |
| GOTERM_BP_I GO        | 45893 positive regulation of transcription, DNA-templated                  | 5        | 11.90476        | 0.044363        | MAP2K3, ZKSCAN17, FOXO3, GRHL2, TGFBR1  | 38         | 736        | 20240        | 3.618421        | 1               | 1               | 1               |     |
| <b>GOTERM_BP_I GO</b> | <b>10976 positive regulation of neuron projection development</b>          | <b>3</b> | <b>7.142857</b> | <b>0.044906</b> | <b>EHD1, ITGA3, FYN</b>                 | <b>38</b>  | <b>185</b> | <b>20240</b> | <b>8.637269</b> | <b>1</b>        | <b>1</b>        | <b>1</b>        |     |
| <b>GOTERM_BP_I GO</b> | <b>7399 nervous system development</b>                                     | <b>4</b> | <b>9.52381</b>  | <b>0.047277</b> | <b>ALK, GAP43, NOVA2, TGFBR1</b>        | <b>38</b>  | <b>445</b> | <b>20240</b> | <b>4.7877</b>   | <b>1</b>        | <b>1</b>        | <b>1</b>        |     |
| GOTERM_BP_I GO        | 7275 multicellular organism development                                    | 6        | 14.28571        | 0.048098        | ALK, GAP43, ZFP36, SPRY4, FYN, WNT2     | 38         | 1098       | 20240        | 2.910555        | 1               | 1               | 1               |     |

**Table S14. KEGG pathway analysis of miR-183C targets in the TG of SNS-CKO strain.**

| Category     | Term     | Count                                                  | % | PValue   | Genes    | List Total                                    | Pop Hits | Pop Total | Id Enrichm | Bonferroni | Benjamini | FDR      |          |
|--------------|----------|--------------------------------------------------------|---|----------|----------|-----------------------------------------------|----------|-----------|------------|------------|-----------|----------|----------|
| KEGG_PATHWAY | mmu04010 | MAPK signaling pathway                                 | 6 | 14.28571 | 3.79E-04 | CACNB1, MAP2K3, MAP3K3, PPP3R1, GNG12, TGFBR1 | 21       | 302       | 9212       | 8.715232   | 0.04514   | 0.046182 | 0.045804 |
| KEGG_PATHWAY | mmu05235 | PD-L1 expression and PD-1 checkpoint pathway in cancer | 4 | 9.52381  | 8.54E-04 | ALK, MAP2K3, MAP3K3, PPP3R1                   | 21       | 88        | 9212       | 19.93939   | 0.098962  | 0.052082 | 0.051655 |
| KEGG_PATHWAY | mmu04218 | Cellular senescence                                    | 4 | 9.52381  | 0.006958 | MAP2K3, PPP3R1, FOXO3, TGFBR1                 | 21       | 184       | 9212       | 9.536232   | 0.573388  | 0.282971 | 0.280651 |
| KEGG_PATHWAY | mmu05166 | Human T-cell leukemia virus 1 infection                | 4 | 9.52381  | 0.016001 | MAP3K3, PPP3R1, ZFP36, TGFBR1                 | 21       | 250       | 9212       | 7.018667   | 0.860246  | 0.414795 | 0.411395 |
| KEGG_PATHWAY | mmu04144 | Endocytosis                                            | 4 | 9.52381  | 0.02001  | EHD1, VPS36, LDLR, TGFBR1                     | 21       | 272       | 9212       | 6.45098    | 0.915078  | 0.414795 | 0.411395 |
| KEGG_PATHWAY | mmu04725 | Cholinergic synapse                                    | 3 | 7.142857 | 0.024134 | KCNJ14, FYN, GNG12                            | 21       | 112       | 9212       | 11.75      | 0.949234  | 0.414795 | 0.411395 |
| KEGG_PATHWAY | mmu04724 | Glutamatergic synapse                                  | 3 | 7.142857 | 0.024944 | GRIA1, PPP3R1, GNG12                          | 21       | 114       | 9212       | 11.54386   | 0.954119  | 0.414795 | 0.411395 |
| KEGG_PATHWAY | mmu05200 | Pathways in cancer                                     | 5 | 11.90476 | 0.0272   | ALK, ITGA3, GNG12, WNT2, TGFBR1               | 21       | 543       | 9212       | 4.039288   | 0.965415  | 0.414795 | 0.411395 |
| KEGG_PATHWAY | mmu04380 | Osteoclast differentiation                             | 3 | 7.142857 | 0.030913 | PPP3R1, FYN, TGFBR1                           | 21       | 128       | 9212       | 10.28125   | 0.978311  | 0.419045 | 0.415611 |
| KEGG_PATHWAY | mmu04921 | Oxytocin signaling pathway                             | 3 | 7.142857 | 0.042823 | CACNB1, PPP3R1, KCNJ14                        | 21       | 153       | 9212       | 8.601307   | 0.995202  | 0.522446 | 0.518164 |

**Table S15. Biological processes GO analysis of miR-183C targets in the cornea of SNS-CKO strain.**

| Category       | Term              | Count                                                        | %        | PValue        | Genes           | List Total                                   | Pop Hits  | Pop Total | Fold Enrichment | Bonferroni      | Benjamini       | FDR      |          |
|----------------|-------------------|--------------------------------------------------------------|----------|---------------|-----------------|----------------------------------------------|-----------|-----------|-----------------|-----------------|-----------------|----------|----------|
| GOTERM_        | GO:0016236        | macroautophagy                                               | 3        | 4.6875        | 0.006833        | GABARAPL2, MAP1LC3B, YOD1                    | 58        | 44        | 20240           | 23.7931         | 0.988942        | 1        | 1        |
| <b>GOTERM_</b> | <b>GO:0006890</b> | <b>retrograde vesicle-mediated transport, Golgi to ER</b>    | <b>3</b> | <b>4.6875</b> | <b>0.006833</b> | <b>ARF4, GOLPH3L, KDELR2</b>                 | <b>58</b> | <b>44</b> | <b>20240</b>    | <b>23.7931</b>  | <b>0.988942</b> | <b>1</b> | <b>1</b> |
| GOTERM_        | GO:0048538        | thymus development                                           | 3        | 4.6875        | 0.011262        | MAP2K1, HES1, IKZF1                          | 58        | 57        | 20240           | 18.36661        | 0.999413        | 1        | 1        |
| GOTERM_        | GO:0051496        | positive regulation of stress fiber assembly                 | 3        | 4.6875        | 0.011643        | SH3PXD2B, TSC1, RAC1                         | 58        | 58        | 20240           | 18.04994        | 0.999545        | 1        | 1        |
| GOTERM_        | GO:0010595        | positive regulation of endothelial cell migration            | 3        | 4.6875        | 0.013633        | ANXA3, PDCCD6, RAC1                          | 58        | 63        | 20240           | 16.61741        | 0.999879        | 1        | 1        |
| GOTERM_        | GO:0035437        | maintenance of protein localization in endoplasmic reticulum | 2        | 3.125         | 0.014003        | KDELR2, TAPT1                                | 58        | 5         | 20240           | 139.5862        | 0.999905        | 1        | 1        |
| GOTERM_        | GO:0045893        | positive regulation of transcription, DNA-templated          | 7        | 10.9375       | 0.017049        | KLF7, MAP2K1, MTA1, EBF1, HES1, IKZF1, FOXO1 | 58        | 736       | 20240           | 3.318966        | 0.999988        | 1        | 1        |
| <b>GOTERM_</b> | <b>GO:0010977</b> | <b>negative regulation of neuron projection development</b>  | <b>3</b> | <b>4.6875</b> | <b>0.026095</b> | <b>TSC1, HES1, PTPRG</b>                     | <b>58</b> | <b>89</b> | <b>20240</b>    | <b>11.76288</b> | <b>1</b>        | <b>1</b> | <b>1</b> |
| GOTERM_        | GO:0006995        | cellular response to nitrogen starvation                     | 2        | 3.125         | 0.027814        | GABARAPL2, MAP1LC3B                          | 58        | 10        | 20240           | 69.7931         | 1               | 1        | 1        |
| GOTERM_        | GO:0007155        | cell adhesion                                                | 6        | 9.375         | 0.028481        | CD164, HES1, FAT3, RAC1, CX3CL1, DGCR2       | 58        | 611       | 20240           | 3.42683         | 1               | 1        | 1        |
| GOTERM_        | GO:0010764        | negative regulation of fibroblast migration                  | 2        | 3.125         | 0.030553        | RAC1, CYGB                                   | 58        | 11        | 20240           | 63.44828        | 1               | 1        | 1        |
| <b>GOTERM_</b> | <b>GO:1904936</b> | <b>interneuron migration</b>                                 | <b>2</b> | <b>3.125</b>  | <b>0.033285</b> | <b>FAT3, RAC1</b>                            | <b>58</b> | <b>12</b> | <b>20240</b>    | <b>58.16092</b> | <b>1</b>        | <b>1</b> | <b>1</b> |
| GOTERM_        | GO:0046425        | regulation of JAK-STAT cascade                               | 2        | 3.125         | 0.036009        | HES1, RAC1                                   | 58        | 13        | 20240           | 53.687          | 1               | 1        | 1        |
| GOTERM_        | GO:0035881        | amacrine cell differentiation                                | 2        | 3.125         | 0.036009        | HES1, IKZF1                                  | 58        | 13        | 20240           | 53.687          | 1               | 1        | 1        |
| GOTERM_        | GO:0051492        | regulation of stress fiber assembly                          | 2        | 3.125         | 0.044136        | TSC1, RAC1                                   | 58        | 16        | 20240           | 43.62069        | 1               | 1        | 1        |

**Table S16. KEGG pathway analysis of miR-183C targets in the cornea of SNS-CKO strain.**

| Category     | Term     | Count                           | % | PValue | Genes    | List Total                              | Pop Hits | Pop Total | Fold Enrichment | Bonferroni | Benjamini | FDR      |          |
|--------------|----------|---------------------------------|---|--------|----------|-----------------------------------------|----------|-----------|-----------------|------------|-----------|----------|----------|
| KEGG_PATHWAY | mmu04140 | Autophagy - animal              | 5 | 7.8125 | 6.21E-04 | GABARAPL2, MAP1LC3B, MAP2K1, TSC1, CTSB | 27       | 142       | 9212            | 12.01356   | 0.094119  | 0.098816 | 0.098816 |
| KEGG_PATHWAY | mmu04071 | Sphingolipid signaling pathway  | 4 | 6.25   | 0.005162 | MAP2K1, GNAI3, RAC1, SGMS2              | 27       | 126       | 9212            | 10.83128   | 0.560869  | 0.285085 | 0.285085 |
| KEGG_PATHWAY | mmu05163 | Human cytomegalovirus infection | 5 | 7.8125 | 0.005379 | MAP2K1, GNAI3, TSC1, RAC1, CX3CL1       | 27       | 256       | 9212            | 6.663773   | 0.575806  | 0.285085 | 0.285085 |
| KEGG_PATHWAY | mmu04062 | Chemokine signaling pathway     | 4 | 6.25   | 0.016289 | MAP2K1, GNAI3, RAC1, CX3CL1             | 27       | 192       | 9212            | 7.108025   | 0.926554  | 0.647471 | 0.647471 |
| KEGG_PATHWAY | mmu04015 | Rap1 signaling pathway          | 4 | 6.25   | 0.021686 | MAP2K1, GNAI3, RAC1, RAPGEF5            | 27       | 214       | 9212            | 6.377293   | 0.969378  | 0.689617 | 0.689617 |
| KEGG_PATHWAY | mmu05231 | Choline metabolism in cancer    | 3 | 4.6875 | 0.030847 | MAP2K1, TSC1, RAC1                      | 27       | 98        | 9212            | 10.44444   | 0.993139  | 0.803113 | 0.803113 |
| KEGG_PATHWAY | mmu04152 | AMPK signaling pathway          | 3 | 4.6875 | 0.049413 | TSC1, ELAVL1, FOXO1                     | 27       | 127       | 9212            | 8.059493   | 0.999683  | 0.803113 | 0.803113 |
| KEGG_PATHWAY | mmu04726 | Serotonergic synapse            | 3 | 4.6875 | 0.052229 | MAP2K1, DUSP1, GNAI3                    | 27       | 131       | 9212            | 7.813401   | 0.999802  | 0.803113 | 0.803113 |
| KEGG_PATHWAY | mmu04068 | FoxO signaling pathway          | 3 | 4.6875 | 0.052229 | GABARAPL2, MAP2K1, FOXO1                | 27       | 131       | 9212            | 7.813401   | 0.999802  | 0.803113 | 0.803113 |

**Table S17. Biological processes GO analysis of miR-183C targets in the TG of miR-183C KO strain.**

| Category    | Term       | Count | %        | PValue   | Genes                                                                                                                                 | List Total | Pop Hits | Pop Total | Fold Enrichr | Bonferroni  | Benjamini | FDR      |
|-------------|------------|-------|----------|----------|---------------------------------------------------------------------------------------------------------------------------------------|------------|----------|-----------|--------------|-------------|-----------|----------|
| GOTERM_BP_I | GO:0045944 | 20    | 15.15152 | 2.30E-04 | MEF2A, MED1, CEBPA, BCL11B, PRRX1, PAX6, ARID3A, EBF3, NPNT, BA promoter                                                              | 125        | 1257     | 20240     | 2.5762928    | 0.261159546 | 0.2905658 | 0.290566 |
| GOTERM_BP_I | GO:0051496 | 5     | 3.787879 | 4.41E-04 | NOX4, BRAF, CD47, PPM1F, WNT4                                                                                                         | 125        | 58       | 20240     | 13.958621    | 0.440806468 | 0.2905658 | 0.290566 |
| GOTERM_BP_I | GO:0000381 | 5     | 3.787879 | 7.63E-04 | RBM25, CELF1, NOVA1, NOVA2, CELF6                                                                                                     | 125        | 67       | 20240     | 12.083582    | 0.634568288 | 0.3354305 | 0.335431 |
| GOTERM_BP_I | GO:0035556 | 10    | 7.575758 | 0.002151 | MAP3K3, SHC1, PNPLA8, PRKCE, PLEKHM1, PSEN2, BRAF, RAPGEF5, DC intracellular signal transduction                                      | 125        | 461      | 20240     | 3.5123644    | 0.941474291 | 0.7088088 | 0.708809 |
| GOTERM_BP_I | GO:0010811 | 4     | 3.030303 | 0.002811 | ITGA3, PRKCE, NPNT, PPM1F                                                                                                             | 125        | 46       | 20240     | 14.08        | 0.97553943  | 0.7102606 | 0.710261 |
| GOTERM_BP_I | GO:0033077 | 4     | 3.030303 | 0.003367 | BCL11B, NKAP, BRAF, WNT4                                                                                                              | 125        | 49       | 20240     | 13.217959    | 0.988266494 | 0.7102606 | 0.710261 |
| GOTERM_BP_I | GO:0045184 | 4     | 3.030303 | 0.003772 | SLC1A1, ANK3, NPNT, KPNB1                                                                                                             | 125        | 51       | 20240     | 12.699608    | 0.993134354 | 0.7102606 | 0.710261 |
| GOTERM_BP_I | GO:0010628 | 11    | 8.333333 | 0.004434 | MEF2A, MED1, CEBPA, ITGA3, CELF1, MSN, BRAF, PAX6, ANK3, LDLR, F positive regulation of gene expression                               | 125        | 612      | 20240     | 2.9103268    | 0.997139317 | 0.7304627 | 0.730463 |
| GOTERM_BP_I | GO:0006606 | 5     | 3.787879 | 0.005843 | MED1, PPP3R1, IPO9, NUP50, KPNB1                                                                                                      | 125        | 117      | 20240     | 6.9196581    | 0.999557544 | 0.8556206 | 0.855621 |
| GOTERM_BP_I | GO:0043066 | 11    | 8.333333 | 0.008294 | GREM1, MED1, BCL11B, SHC1, PRKCE, RASA1, PSEN2, MDM4, DHCR24                                                                          | 125        | 671      | 20240     | 2.6544262    | 0.999982915 | 1         | 1        |
| GOTERM_BP_I | GO:0071539 | 3     | 2.272727 | 0.009409 | CDCC14, CEP250, HOOK3                                                                                                                 | 125        | 24       | 20240     | 20.24        | 0.999996121 | 1         | 1        |
| GOTERM_BP_I | GO:0000122 | 14    | 10.60606 | 0.01061  | MEF2A, MED1, IRX2, CEBPA, PRRX1, NKAP, PSEN2, ARID5B, PAX6, ZBTf negative regulation of transcription from RNA polymerase II promoter | 125        | 1031     | 20240     | 2.1987197    | 0.999999216 | 1         | 1        |
| GOTERM_BP_I | GO:0031022 | 2     | 1.515152 | 0.012216 | SUN2, SYNE2                                                                                                                           | 125        | 2        | 20240     | 161.92       | 0.999999908 | 1         | 1        |
| GOTERM_BP_I | GO:0006470 | 5     | 3.787879 | 0.013696 | PPP2CA, PPP3R1, PPM1L, PTPN9, PPM1F                                                                                                   | 125        | 150      | 20240     | 5.3973333    | 0.999999987 | 1         | 1        |
| GOTERM_BP_I | GO:0045893 | 11    | 8.333333 | 0.015115 | GREM1, MEF2A, MED1, KLF7, CEBPA, SHC1, MORF4L2, EBF3, PAX6, GF positive regulation of transcription, DNA-templated                    | 125        | 736      | 20240     | 2.42         | 0.999999998 | 1         | 1        |
| GOTERM_BP_I | GO:0050680 | 4     | 3.030303 | 0.017916 | ZEB1, CELF1, PAX6, MTSS1                                                                                                              | 125        | 90       | 20240     | 7.1964444    | 1           | 1         | 1        |
| GOTERM_BP_I | GO:0015031 | 10    | 7.575758 | 0.017967 | RD3, GGA2, IPO9, PGAP1, ANKRD27, PLEKHM1, PSEN2, HOOK3, SNX30                                                                         | 125        | 646      | 20240     | 2.5065015    | 1           | 1         | 1        |
| GOTERM_BP_I | GO:0043368 | 2     | 1.515152 | 0.018268 | BCL11B, BRAF                                                                                                                          | 125        | 3        | 20240     | 107.94667    | 1           | 1         | 1        |
| GOTERM_BP_I | GO:0021817 | 2     | 1.515152 | 0.018268 | SUN2, SYNE2                                                                                                                           | 125        | 3        | 20240     | 107.94667    | 1           | 1         | 1        |
| GOTERM_BP_I | GO:0072660 | 2     | 1.515152 | 0.018268 | ANK3, ADCY6                                                                                                                           | 125        | 3        | 20240     | 107.94667    | 1           | 1         | 1        |
| GOTERM_BP_I | GO:0030182 | 6     | 4.545455 | 0.019871 | IRX2, GDNF, SHC1, NOVA2, PAX6, WNT4                                                                                                   | 125        | 253      | 20240     | 3.84         | 1           | 1         | 1        |
| GOTERM_BP_I | GO:0050729 | 4     | 3.030303 | 0.022996 | CEBPA, CD47, LDLR, CX3CL1                                                                                                             | 125        | 99       | 20240     | 6.5422222    | 1           | 1         | 1        |
| GOTERM_BP_I | GO:2001234 | 3     | 2.272727 | 0.024954 | PSEN2, CX3CL1, WNT4                                                                                                                   | 125        | 40       | 20240     | 12.144       | 1           | 1         | 1        |
| GOTERM_BP_I | GO:0006397 | 7     | 5.30303  | 0.025904 | SYNCRIP, PP1L1, RBM25, CELF1, NOVA1, NOVA2, CELF6                                                                                     | 125        | 368      | 20240     | 3.08         | 1           | 1         | 1        |
| GOTERM_BP_I | GO:0001933 | 4     | 3.030303 | 0.026772 | PPP2CA, MYADM, PSEN2, PAX6                                                                                                            | 125        | 105      | 20240     | 6.168381     | 1           | 1         | 1        |
| GOTERM_BP_I | GO:0010976 | 5     | 3.787879 | 0.027169 | RGS2, ANKRD27, ITGA3, STMN2, CX3CL1                                                                                                   | 125        | 185      | 20240     | 4.3762162    | 1           | 1         | 1        |
| GOTERM_BP_I | GO:0001656 | 3     | 2.272727 | 0.027329 | IRX2, GDNF, WNT4                                                                                                                      | 125        | 42       | 20240     | 11.565714    | 1           | 1         | 1        |
| GOTERM_BP_I | GO:0010634 | 3     | 2.272727 | 0.027329 | ITGA3, PRKCE, PPM1F                                                                                                                   | 125        | 42       | 20240     | 11.565714    | 1           | 1         | 1        |
| GOTERM_BP_I | GO:0007528 | 3     | 2.272727 | 0.029791 | CACNB1, CACNA2D2, ANK3                                                                                                                | 125        | 44       | 20240     | 11.04        | 1           | 1         | 1        |
| GOTERM_BP_I | GO:0008380 | 6     | 4.545455 | 0.029907 | SYNCRIP, PP1L1, RBM25, CELF1, NOVA1, NOVA2                                                                                            | 125        | 282      | 20240     | 3.4451064    | 1           | 1         | 1        |
| GOTERM_BP_I | GO:0007411 | 5     | 3.787879 | 0.03006  | KLF7, GAP43, MYCBP2, PAX6, ANK3                                                                                                       | 125        | 191      | 20240     | 4.2387435    | 1           | 1         | 1        |
| GOTERM_BP_I | GO:0060676 | 2     | 1.515152 | 0.030262 | GREM1, GDNF                                                                                                                           | 125        | 5        | 20240     | 64.768       | 1           | 1         | 1        |
| GOTERM_BP_I | GO:0043547 | 5     | 3.787879 | 0.030559 | RASA1, RAPGEF5, EVIS, CX3CL1, WNT4                                                                                                    | 125        | 192      | 20240     | 4.2166667    | 1           | 1         | 1        |
| GOTERM_BP_I | GO:0000165 | 4     | 3.030303 | 0.032291 | MEF2A, PPM1L, PRKCE, BRAF                                                                                                             | 125        | 113      | 20240     | 5.7316814    | 1           | 1         | 1        |
| GOTERM_BP_I | GO:0007420 | 6     | 4.545455 | 0.033569 | MED1, RGS2, SYT1, SLC1A1, PAX6, GRHL2                                                                                                 | 125        | 291      | 20240     | 3.3385567    | 1           | 1         | 1        |
| GOTERM_BP_I | GO:0000902 | 4     | 3.030303 | 0.033757 | GREM1, MED1, NOX4, SIDT2                                                                                                              | 125        | 115      | 20240     | 5.632        | 1           | 1         | 1        |
| GOTERM_BP_I | GO:1902667 | 2     | 1.515152 | 0.036205 | NOVA2, MYCBP2                                                                                                                         | 125        | 6        | 20240     | 53.973333    | 1           | 1         | 1        |
| GOTERM_BP_I | GO:0008203 | 4     | 3.030303 | 0.036791 | CEBPA, INSIG2, DHCR24, LDLR                                                                                                           | 125        | 119      | 20240     | 5.4426891    | 1           | 1         | 1        |
| GOTERM_BP_I | GO:0001658 | 3     | 2.272727 | 0.037675 | GDNF, NPNT, WNT4                                                                                                                      | 125        | 50       | 20240     | 9.7152       | 1           | 1         | 1        |
| GOTERM_BP_I | GO:0007409 | 4     | 3.030303 | 0.038359 | KLF7, BCL11B, PAX6, ANK3                                                                                                              | 125        | 121      | 20240     | 5.3527273    | 1           | 1         | 1        |
| GOTERM_BP_I | GO:0006357 | 17    | 12.87879 | 0.040129 | MEF2A, MED1, IRX2, CEBPA, BCL11B, PRRX1, ATP2B4, ARID5B, PAX6, A regulation of transcription from RNA polymerase II promoter          | 125        | 1627     | 20240     | 1.69185      | 1           | 1         | 1        |
| GOTERM_BP_I | GO:0007507 | 6     | 4.545455 | 0.040271 | MEF2A, MED1, PPP3R1, ITGA3, SHC1, GNA11                                                                                               | 125        | 306      | 20240     | 3.174902     | 1           | 1         | 1        |
| GOTERM_BP_I | GO:0010894 | 2     | 1.515152 | 0.042111 | INSIG2, WNT4                                                                                                                          | 125        | 7        | 20240     | 46.262857    | 1           | 1         | 1        |
| GOTERM_BP_I | GO:0021902 | 2     | 1.515152 | 0.042111 | BCL11B, PAX6                                                                                                                          | 125        | 7        | 20240     | 46.262857    | 1           | 1         | 1        |
| GOTERM_BP_I | GO:0003337 | 2     | 1.515152 | 0.042111 | GREM1, GDNF                                                                                                                           | 125        | 7        | 20240     | 46.262857    | 1           | 1         | 1        |
| GOTERM_BP_I | GO:1903078 | 3     | 2.272727 | 0.047754 | ITGA3, ATP2B4, PTPN9                                                                                                                  | 125        | 57       | 20240     | 8.5221053    | 1           | 1         | 1        |
| GOTERM_BP_I | GO:0048538 | 3     | 2.272727 | 0.047754 | BCL11B, PSEN2, BRAF                                                                                                                   | 125        | 57       | 20240     | 8.5221053    | 1           | 1         | 1        |
| GOTERM_BP_I | GO:1903979 | 2     | 1.515152 | 0.047982 | LDLR, CX3CL1                                                                                                                          | 125        | 8        | 20240     | 40.48        | 1           | 1         | 1        |

**Table S18. KEGG pathway analysis of miR-183C targets in the TG of miR-183C KO strain.**

| Category     | Term     | Count                                               | % | PValue          | Genes           | List Total                                                 | Pop Hits | Pop Total  | Fold Enrich | Bonferron       | Benjamini       | FDR             |                 |
|--------------|----------|-----------------------------------------------------|---|-----------------|-----------------|------------------------------------------------------------|----------|------------|-------------|-----------------|-----------------|-----------------|-----------------|
| KEGG_PATHWAY | mmu04022 | cGMP-PKG signaling pathway                          | 7 | 5.30303         | 8.70E-04        | MEF2A, PPP3R1, RGS2, GNA11, PRKCE, ATP2B4, ADCY6           | 61       | 173        | 9212        | 6.11049         | 0.144202        | 0.155653        | 0.155653        |
| KEGG_PATHWAY | mmu04010 | MAPK signaling pathway                              | 8 | 6.060606        | 0.003306        | CACNB1, MAP3K3, PPP3R1, GDNF, RASA1, CACNA2D2, BRAF, GNG12 | 61       | 302        | 9212        | 4.000434        | 0.447202        | 0.256397        | 0.256397        |
| KEGG_PATHWAY | mmu04925 | Aldosterone synthesis and secretion                 | 5 | <b>3.787879</b> | <b>0.004297</b> | GNA11, PRKCE, ATP2B4, LDLR, ADCY6                          | 61       | <b>102</b> | <b>9212</b> | <b>7.402764</b> | <b>0.537379</b> | <b>0.256397</b> | <b>0.256397</b> |
| KEGG_PATHWAY | mmu04921 | Oxytocin signaling pathway                          | 5 | <b>3.787879</b> | <b>0.017377</b> | CACNB1, PPP3R1, RGS2, CACNA2D2, ADCY6                      | 61       | <b>153</b> | <b>9212</b> | <b>4.935176</b> | <b>0.956619</b> | <b>0.460731</b> | <b>0.460731</b> |
| KEGG_PATHWAY | mmu04261 | Adrenergic signaling in cardiomyocytes              | 5 | 3.787879        | 0.018527        | CACNB1, PPP2CA, ATP2B4, CACNA2D2, ADCY6                    | 61       | 156        | 9212        | 4.840269        | 0.964825        | 0.460731        | 0.460731        |
| KEGG_PATHWAY | mmu04512 | ECM-receptor interaction                            | 4 | <b>3.030303</b> | <b>0.020078</b> | SV2C, ITGA3, CD47, NPNT                                    | 61       | <b>89</b>  | <b>9212</b> | <b>6.787254</b> | <b>0.973497</b> | <b>0.460731</b> | <b>0.460731</b> |
| KEGG_PATHWAY | mmu04934 | Cushing syndrome                                    | 5 | 3.787879        | 0.020968        | GNA11, BRAF, LDLR, ADCY6, WNT4                             | 61       | 162        | 9212        | 4.661           | 0.977476        | 0.460731        | 0.460731        |
| KEGG_PATHWAY | mmu01522 | Endocrine resistance                                | 4 | 3.030303        | 0.022528        | MED1, SHC1, BRAF, ADCY6                                    | 61       | 93         | 9212        | 6.495329        | 0.98307         | 0.460731        | 0.460731        |
| KEGG_PATHWAY | mmu05414 | Dilated cardiomyopathy                              | 4 | 3.030303        | 0.023165        | CACNB1, ITGA3, CACNA2D2, ADCY6                             | 61       | 94         | 9212        | 6.42623         | 0.984935        | 0.460731        | 0.460731        |
| KEGG_PATHWAY | mmu04928 | Parathyroid hormone synthesis, secretion and action | 4 | 3.030303        | 0.033109        | MEF2A, GNA11, BRAF, ADCY6                                  | 61       | 108        | 9212        | 5.5932          | 0.997587        | 0.566109        | 0.566109        |
| KEGG_PATHWAY | mmu04062 | Chemokine signaling pathway                         | 5 | <b>3.787879</b> | <b>0.036078</b> | SHC1, BRAF, GNG12, CX3CL1, ADCY6                           | 61       | <b>192</b> | <b>9212</b> | <b>3.932719</b> | <b>0.998608</b> | <b>0.566109</b> | <b>0.566109</b> |
| KEGG_PATHWAY | mmu04724 | Glutamatergic synapse                               | 4 | 3.030303        | 0.037951        | PPP3R1, SLC1A1, GNG12, ADCY6                               | 61       | 114        | 9212        | 5.298821        | 0.999018        | 0.566109        | 0.566109        |
| KEGG_PATHWAY | mmu04722 | Neurotrophin signaling pathway                      | 4 | 3.030303        | 0.044035        | MAP3K3, SHC1, PSEN2, BRAF                                  | 61       | 121        | 9212        | 4.992277        | 0.999684        | 0.606329        | 0.606329        |



**Table S19. Biological processes GO analysis of miR-183C targets in the cornea of miR-183C KO strain.**

| Category | Term       | Count                                                                             | %  | PValue   | Genes    | List Total                                                                   | Pop Hit | Pop Total | Fold Enrich | Bonferroni | Benjamini | FDR      |          |
|----------|------------|-----------------------------------------------------------------------------------|----|----------|----------|------------------------------------------------------------------------------|---------|-----------|-------------|------------|-----------|----------|----------|
| GOTERM_  | GO:0007399 | nervous system development                                                        | 11 | 11.95652 | 1.71E-05 | ROBO2, GRIP1, MEF2C, NRN1, FUT9, MYT1L, NOVA2, AVIL, DIP2A, PRKD1, RTN4      | 86      | 445       | 20240       | 5.817612   | 0.014931  | 0.015043 | 0.014958 |
| GOTERM_  | GO:0010976 | positive regulation of neuron projection development                              | 7  | 7.608696 | 1.29E-04 | ANKRD27, FUT9, AVIL, DAB2IP, CNTN1, FYN, PRKD1                               | 86      | 185       | 20240       | 8.905091   | 0.107293  | 0.044649 | 0.044395 |
| GOTERM_  | GO:0090649 | response to oxygen-glucose deprivation                                            | 3  | 3.26087  | 1.73E-04 | SOX2, ZEB2, BNIP3                                                            | 86      | 5         | 20240       | 141.2093   | 0.140838  | 0.044649 | 0.044395 |
| GOTERM_  | GO:0002062 | chondrocyte differentiation                                                       | 5  | 5.434783 | 2.03E-04 | MEF2C, PRKCA, TGFB1, SLC39A14, SOX5                                          | 86      | 69        | 20240       | 17.05426   | 0.163572  | 0.044649 | 0.044395 |
| GOTERM_  | GO:2000300 | regulation of synaptic vesicle exocytosis                                         | 5  | 5.434783 | 4.53E-04 | NRN1, SV2C, PRKCE, PRKCA, CACNA1E                                            | 86      | 85        | 20240       | 13.84405   | 0.328074  | 0.079503 | 0.079051 |
| GOTERM_  | GO:0055085 | transmembrane transport                                                           | 9  | 9.782609 | 6.41E-04 | SLC25A1, CLCN5, SV2C, KCNH5, SLC39A5, CACNA1E, SLC39A1, SLC39A14, SLC16A13   | 86      | 454       | 20240       | 4.665506   | 0.430461  | 0.086473 | 0.085981 |
| GOTERM_  | GO:0030182 | neuron differentiation                                                            | 7  | 7.608696 | 6.89E-04 | SOX2, MEF2C, FUT9, MYT1L, NOVA2, ELAVL4, RTN4                                | 86      | 253       | 20240       | 6.511628   | 0.45421   | 0.086473 | 0.085981 |
| GOTERM_  | GO:0006915 | apoptotic process                                                                 | 10 | 10.86957 | 0.001902 | TOX3, MEF2C, BNIP3, DAB2IP, ELMO1, AATK, PRKCA, UNC5D, NSG1, PRKD1           | 86      | 666       | 20240       | 3.533766   | 0.812051  | 0.208749 | 0.207561 |
| GOTERM_  | GO:0035556 | intracellular signal transduction                                                 | 8  | 8.695652 | 0.003256 | DUSP1, MAK, PRKCE, FYN, PRKCA, PRKD1, DGKK, TNS1                             | 86      | 461       | 20240       | 4.084145   | 0.942911  | 0.304299 | 0.302566 |
| GOTERM_  | GO:0006811 | ion transport                                                                     | 9  | 9.782609 | 0.003812 | CLCN5, KCNH5, CACNA2D1, SLC39A5, CACNA1E, SLC39A1, SLC39A14, GRIA3, ATP6V1C1 | 86      | 603       | 20240       | 3.512669   | 0.965018  | 0.304299 | 0.302566 |
| GOTERM_  | GO:0071577 | zinc II ion transmembrane transport                                               | 3  | 3.26087  | 0.003812 | SLC39A5, SLC39A1, SLC39A14                                                   | 86      | 22        | 20240       | 32.09302   | 0.965045  | 0.304299 | 0.302566 |
| GOTERM_  | GO:0006829 | zinc II ion transport                                                             | 3  | 3.26087  | 0.004911 | SLC39A5, SLC39A1, SLC39A14                                                   | 86      | 25        | 20240       | 28.24186   | 0.986732  | 0.358342 | 0.356301 |
| GOTERM_  | GO:0061178 | regulation of insulin secretion involved in cellular response to glucose stimulus | 3  | 3.26087  | 0.005306 | PRKCE, CACNA1E, SIDT2                                                        | 86      | 26        | 20240       | 27.15564   | 0.990636  | 0.358342 | 0.356301 |
| GOTERM_  | GO:0030001 | metal ion transport                                                               | 3  | 3.26087  | 0.005715 | SLC39A5, SLC39A1, SLC39A14                                                   | 86      | 27        | 20240       | 26.14987   | 0.993473  | 0.35839  | 0.356349 |
| GOTERM_  | GO:0022409 | positive regulation of cell-cell adhesion                                         | 3  | 3.26087  | 0.006138 | SOX2, MAGI1, PDE4D                                                           | 86      | 28        | 20240       | 25.21595   | 0.995508  | 0.359251 | 0.357205 |
| GOTERM_  | GO:0030517 | negative regulation of axon extension                                             | 3  | 3.26087  | 0.006574 | TRIM46, AATK, RTN4                                                           | 86      | 29        | 20240       | 24.34643   | 0.996946  | 0.360764 | 0.35871  |
| GOTERM_  | GO:0050730 | regulation of peptidyl-tyrosine phosphorylation                                   | 3  | 3.26087  | 0.007489 | PRKCE, FYN, PRKCA                                                            | 86      | 31        | 20240       | 22.77569   | 0.99864   | 0.38678  | 0.384577 |
| GOTERM_  | GO:1904520 | regulation of myofibroblast cell apoptotic process                                | 2  | 2.173913 | 0.008382 | SOX2, ZEB2                                                                   | 86      | 2         | 20240       | 235.3488   | 0.999383  | 0.408845 | 0.406516 |
| GOTERM_  | GO:0007626 | locomotory behavior                                                               | 4  | 4.347826 | 0.014426 | ELAVL4, CNTN1, SOBP, CACNA1E                                                 | 86      | 121       | 20240       | 7.780127   | 0.999997  | 0.666646 | 0.66285  |
| GOTERM_  | GO:0001764 | neuron migration                                                                  | 4  | 4.347826 | 0.028019 | MEF2C, TRIM46, FYN, CELSR3                                                   | 86      | 156       | 20240       | 6.034586   | 1         | 1        | 0.995439 |
| GOTERM_  | GO:0010595 | positive regulation of endothelial cell migration                                 | 3  | 3.26087  | 0.02885  | ANXA3, PRKCA, PRKD1                                                          | 86      | 63        | 20240       | 11.20709   | 1         | 1        | 0.995439 |
| GOTERM_  | GO:0045766 | positive regulation of angiogenesis                                               | 4  | 4.347826 | 0.030848 | ANXA3, PRKCA, PRKD1, RTN4                                                    | 86      | 162       | 20240       | 5.811082   | 1         | 1        | 0.995439 |
| GOTERM_  | GO:0007015 | actin filament organization                                                       | 4  | 4.347826 | 0.032317 | TPM2, AVIL, ELMO1, TAGLN3                                                    | 86      | 165       | 20240       | 5.705426   | 1         | 1        | 0.995439 |
| GOTERM_  | GO:0071578 | zinc II ion transmembrane import                                                  | 2  | 2.173913 | 0.033113 | SLC39A5, SLC39A14                                                            | 86      | 8         | 20240       | 58.83721   | 1         | 1        | 0.995439 |
| GOTERM_  | GO:0006688 | glycosphingolipid biosynthetic process                                            | 2  | 2.173913 | 0.037175 | FUT9, B4GALNT1                                                               | 86      | 9         | 20240       | 52.29974   | 1         | 1        | 0.995439 |
| GOTERM_  | GO:0007275 | multicellular organism development                                                | 10 | 10.86957 | 0.040593 | SOX2, ROBO2, MEF2C, MYT1L, DAB2IP, DIP2A, FYN, UNC5D, HOXD8, CELSR3          | 86      | 1098      | 20240       | 2.143432   | 1         | 1        | 0.995439 |
| GOTERM_  | GO:0045822 | negative regulation of heart contraction                                          | 2  | 2.173913 | 0.04122  | PDE4D, PRKCA                                                                 | 86      | 10        | 20240       | 47.06977   | 1         | 1        | 0.995439 |
| GOTERM_  | GO:0098887 | neurotransmitter receptor transport, endosome to postsynaptic membrane            | 2  | 2.173913 | 0.04122  | GRIP1, NSG1                                                                  | 86      | 10        | 20240       | 47.06977   | 1         | 1        | 0.995439 |
| GOTERM_  | GO:0007155 | cell adhesion                                                                     | 7  | 7.608696 | 0.04357  | PRKCE, FIBCD1, CNTN1, PRKCA, TGFB1, CELSR3, PCDH17                           | 86      | 611       | 20240       | 2.696304   | 1         | 1        | 0.995439 |
| GOTERM_  | GO:0071560 | cellular response to transforming growth factor beta stimulus                     | 3  | 3.26087  | 0.043603 | MEF2C, FYN, SOX5                                                             | 86      | 79        | 20240       | 8.937298   | 1         | 1        | 0.995439 |
| GOTERM_  | GO:0046777 | protein autophosphorylation                                                       | 4  | 4.347826 | 0.048356 | MAK, FYN, PRKCA, PRKD1                                                       | 86      | 194       | 20240       | 4.852553   | 1         | 1        | 0.995439 |
| GOTERM_  | GO:0043524 | negative regulation of neuron apoptotic process                                   | 4  | 4.347826 | 0.049583 | TOX3, MEF2C, FYN, SNCB                                                       | 86      | 196       | 20240       | 4.803037   | 1         | 1        | 0.995439 |
| GOTERM_  | GO:0045165 | cell fate commitment                                                              | 3  | 3.26087  | 0.049721 | SOX2, MEF2C, SOX5                                                            | 86      | 85        | 20240       | 8.30643    | 1         | 1        | 0.995439 |

**Table S20. KEGG pathway analysis of miR-183C targets in the cornea of miR-183C KO strain.**

| Category | Term                                                         | Count | %        | PValue   | Genes                                  | List Total | Pop Hits | Pop Total | Fold Enrich | Bonferroni | Benjamini | FDR      |
|----------|--------------------------------------------------------------|-------|----------|----------|----------------------------------------|------------|----------|-----------|-------------|------------|-----------|----------|
| KEGG_PA1 | mmu04360:Axon guidance                                       | 5     | 5.434783 | 0.004219 | ROBO2, FYN, PRKCA, UNC5D, SSH2         | 35         | 181      | 9212      | 7.270718    | 0.4301     | 0.561107  | 0.561107 |
| KEGG_PA1 | mmu04010:MAPK signaling pathway                              | 5     | 5.434783 | 0.024221 | MEF2C, DUSP1, CACNA2D1, PRKCA, CACNA1E | 35         | 302      | 9212      | 4.357616    | 0.961651   | 0.880408  | 0.880408 |
| KEGG_PAT | mmu05032:Morphine addiction                                  | 3     | 3.26087  | 0.044137 | GNG5, PDE4D, PRKCA                     | 35         | 91       | 9212      | 8.676923    | 0.99753    | 0.880408  | 0.880408 |
| KEGG_PA1 | mmu04713:Circadian entrainment                               | 3     | 3.26087  | 0.050421 | GNG5, PRKCA, GRIA3                     | 35         | 98       | 9212      | 8.057143    | 0.998973   | 0.880408  | 0.880408 |
| KEGG_PAT | mmu04925:Aldosterone synthesis and secretion                 | 3     | 3.26087  | 0.054149 | PRKCE, PRKCA, PRKD1                    | 35         | 102      | 9212      | 7.741176    | 0.999391   | 0.880408  | 0.880408 |
| KEGG_PAT | mmu04928:Parathyroid hormone synthesis, secretion and action | 3     | 3.26087  | 0.05992  | MEF2C, PDE4D, PRKCA                    | 35         | 108      | 9212      | 7.311111    | 0.99973    | 0.880408  | 0.880408 |
| KEGG_PA1 | mmu04725:Cholinergic synapse                                 | 3     | 3.26087  | 0.063881 | GNG5, FYN, PRKCA                       | 35         | 112      | 9212      | 7.05        | 0.999846   | 0.880408  | 0.880408 |
| KEGG_PA1 | mmu04724:Glutamatergic synapse                               | 3     | 3.26087  | 0.065895 | GNG5, PRKCA, GRIA3                     | 35         | 114      | 9212      | 6.926316    | 0.999884   | 0.880408  | 0.880408 |
| KEGG_PAT | mmu05012:Parkinson disease                                   | 4     | 4.347826 | 0.072604 | DUSP1, SLC39A5, SLC39A1, SLC39A14      | 35         | 264      | 9212      | 3.987879    | 0.999956   | 0.880408  | 0.880408 |
| KEGG_PA1 | mmu04071:Sphingolipid signaling pathway                      | 3     | 3.26087  | 0.078411 | PRKCE, FYN, PRKCA                      | 35         | 126      | 9212      | 6.266667    | 0.999981   | 0.880408  | 0.880408 |
| KEGG_PA1 | mmu04726:Serotonergic synapse                                | 3     | 3.26087  | 0.083833 | GNG5, DUSP1, PRKCA                     | 35         | 131      | 9212      | 6.027481    | 0.999991   | 0.880408  | 0.880408 |
| KEGG_PA1 | mmu04728:Dopaminergic synapse                                | 3     | 3.26087  | 0.088253 | GNG5, PRKCA, GRIA3                     | 35         | 135      | 9212      | 5.848889    | 0.999995   | 0.880408  | 0.880408 |
| KEGG_PA1 | mmu04371:Apelin signaling pathway                            | 3     | 3.26087  | 0.090489 | MEF2C, GNG5, PRKCE                     | 35         | 137      | 9212      | 5.763504    | 0.999997   | 0.880408  | 0.880408 |

**Table S21. Biological processes GO analysis of miR-183C targets in the TG of both SNS-CKO and miR-183C KO strains.**

| Category       | Term                                                                            | Count    | %                  | PValue             | Genes                                                                                                                                                               | List Total | Pop Hits   | Pop Total    | Fold Enrichment    | Bonferroni         | Benjamin<br>i   | FDR             |
|----------------|---------------------------------------------------------------------------------|----------|--------------------|--------------------|---------------------------------------------------------------------------------------------------------------------------------------------------------------------|------------|------------|--------------|--------------------|--------------------|-----------------|-----------------|
| GOTERM_        | GO:0045944~positive regulation of transcription from RNA polymerase II promoter | 24       | 15.09433962        | 3.79E-05           | MEF2A, MED1, CEBPA, RARG, BCL11B, PRRX1, PAX6, ARID3A, EBF3, FOXO3, NPNT, BAZ1B, GRHL2, CX3CL1, GREM1, KLF7, PPP3R1, ZEB1, GDNF, MORF4L2, NCK2, WNT2, ZFP451, KDM6A | 148        | 1257       | 20240        | 2.611107528        | 0.056897194        | 0.049077        | 0.048982        |
| GOTERM_        | GO:0051496~positive regulation of stress fiber assembly                         | 6        | 3.773584906        | 6.34E-05           | NOX4, BRAF, CD47, TGFBF1, PPM1F, WNT4                                                                                                                               | 148        | 58         | 20240        | 14.1472507         | 0.093494124        | 0.049077        | 0.048982        |
| GOTERM_        | GO:0035556~intracellular signal transduction                                    | 13       | 8.176100629        | 1.41E-04           | MAP3K3, SHC1, PNPLA8, PRKCE, PSEN2, BRAF, TGFBF1, ADCY6, ZFP36, PLEKHM1, FYN, DGKK, RAPGEF5                                                                         | 148        | 461        | 20240        | 3.85648121         | 0.196263587        | 0.059039        | 0.058924        |
| GOTERM_        | GO:0010628~positive regulation of gene expression                               | 15       | 9.433962264        | 1.53E-04           | MEF2A, GRIA1, MED1, CEBPA, RARG, ITGA3, CELF1, MSN, PAX6, BRAF, ANK3, TGFBF1, PPM1F, LDLR, KDM6A                                                                    | 148        | 612        | 20240        | 3.351881293        | 0.210355323        | 0.059039        | 0.058924        |
| <b>GOTERM_</b> | <b>GO:0071560~cellular response to transforming growth factor beta stimulus</b> | <b>6</b> | <b>3.773584906</b> | <b>2.76E-04</b>    | <b>ZEB1, NOX4, FYN, WNT2, TGFBF1, WNT4</b>                                                                                                                          | <b>148</b> | <b>79</b>  | <b>20240</b> | <b>10.38658912</b> | <b>0.347755938</b> | <b>0.085455</b> | <b>0.08529</b>  |
| GOTERM_        | GO:0045893~positive regulation of transcription, DNA-templated                  | 15       | 9.433962264        | 9.61E-04           | MEF2A, MAP2K3, MED1, CEBPA, SHC1, PAX6, EBF3, FOXO3, GRHL2, TGFBF1, GREM1, KLF7, MORF4L2, ZKSCAN17, WNT4                                                            | 148        | 736        | 20240        | 2.787162162        | 0.774207277        | 0.246773        | 0.246294        |
| GOTERM_        | GO:0000122~negative regulation of transcription from RNA polymerase II promoter | 18       | 11.32075472        | 0.001344064        | MEF2A, MED1, IRX2, CEBPA, RARG, PRRX1, NKAP, PSEN2, ARID5B, PAX6, FOXO3, ZBTB41, PPP2CA, KLF7, ZFP36, ZEB1, LCOR, MDM4                                              | 148        | 1031       | 20240        | 2.387605841        | 0.875152922        | 0.246773        | 0.246294        |
| GOTERM_        | GO:0000165~MAPK cascade                                                         | 6        | 3.773584906        | 0.001412669        | MEF2A, MAP2K3, ZFP36, PPM1L, PRKCE, BRAF                                                                                                                            | 148        | 113        | 20240        | 7.261420713        | 0.887740703        | 0.246773        | 0.246294        |
| GOTERM_        | GO:0000381~regulation of alternative mRNA splicing, via spliceosome             | 5        | 3.144654088        | 0.001435653        | RBM25, CELF1, NOVA1, NOVA2, CELF6                                                                                                                                   | 148        | 67         | 20240        | 10.20572812        | 0.891667617        | 0.246773        | 0.246294        |
| GOTERM_        | GO:0007507~heart development                                                    | 9        | 5.660377358        | 0.001809947        | MEF2A, MAP2K3, MED1, PPP3R1, ITGA3, SHC1, GNA11, TGFBF1, KDM6A                                                                                                      | 148        | 306        | 20240        | 4.022257552        | 0.939343281        | 0.279999        | 0.279456        |
| <b>GOTERM_</b> | <b>GO:0010976~positive regulation of neuron projection development</b>          | <b>7</b> | <b>4.402515723</b> | <b>0.002345408</b> | <b>EHD1, RGS2, ANKRD27, ITGA3, STMN2, FYN, CX3CL1</b>                                                                                                               | <b>148</b> | <b>185</b> | <b>20240</b> | <b>5.174579985</b> | <b>0.973552891</b> | <b>0.32985</b>  | <b>0.32921</b>  |
| GOTERM_        | GO:0043066~negative regulation of apoptotic process                             | 13       | 8.176100629        | 0.003657853        | MED1, BCL11B, SHC1, PRKCE, PSEN2, DHCR24, BRAF, TGFBF1, CX3CL1, GREM1, RASA1, CASP2, MDM4                                                                           | 148        | 671        | 20240        | 2.649534781        | 0.996548939        | 0.471558        | 0.470644        |
| <b>GOTERM_</b> | <b>GO:0007528~neuromuscular junction development</b>                            | <b>4</b> | <b>2.51572327</b>  | <b>0.003997876</b> | <b>CACNB1, CACNA2D2, ANK3, KY</b>                                                                                                                                   | <b>148</b> | <b>44</b>  | <b>20240</b> | <b>12.43243243</b> | <b>0.997964696</b> | <b>0.475747</b> | <b>0.474825</b> |
| GOTERM_        | GO:0010811~positive regulation of cell-substrate adhesion                       | 4        | 2.51572327         | 0.004534167        | ITGA3, PRKCE, NPNT, PPM1F                                                                                                                                           | 148        | 46         | 20240        | 11.89189189        | 0.99911534         | 0.501025        | 0.500054        |
| GOTERM_        | GO:0033077~T cell differentiation in thymus                                     | 4        | 2.51572327         | 0.005416753        | BCL11B, NKAP, BRAF, WNT4                                                                                                                                            | 148        | 49         | 20240        | 11.16381688        | 0.999775693        | 0.526913        | 0.525891        |
| <b>GOTERM_</b> | <b>GO:0007420~brain development</b>                                             | <b>8</b> | <b>5.031446541</b> | <b>0.00544965</b>  | <b>ALK, MED1, RGS2, SYT1, SLC1A1, CASP2, PAX6, GRHL2</b>                                                                                                            | <b>148</b> | <b>291</b> | <b>20240</b> | <b>3.759635925</b> | <b>0.999786882</b> | <b>0.526913</b> | <b>0.525891</b> |
| GOTERM_        | GO:0045184~establishment of protein localization                                | 4        | 2.51572327         | 0.00605848         | SLC1A1, ANK3, NPNT, KPNB1                                                                                                                                           | 148        | 51         | 20240        | 10.72602014        | 0.999917357        | 0.551322        | 0.550253        |
| <b>GOTERM_</b> | <b>GO:0003407~neural retina development</b>                                     | <b>3</b> | <b>1.886792453</b> | <b>0.0066335</b>   | <b>USP45, ATP2B4, CASP2</b>                                                                                                                                         | <b>148</b> | <b>17</b>  | <b>20240</b> | <b>24.13354531</b> | <b>0.999966239</b> | <b>0.570113</b> | <b>0.569007</b> |
| GOTERM_        | GO:0015031~protein transport                                                    | 12       | 7.547169811        | 0.007602606        | RD3, GGA2, EHD1, IPO9, PGAP1, ANKRD27, PLEKHM1, PSEN2, HOOK3, SNX30, VPS36, KPNB1                                                                                   | 148        | 646        | 20240        | 2.540373191        | 0.999992542        | 0.619012        | 0.617812        |
| GOTERM_        | GO:0048538~thymus development                                                   | 4        | 2.51572327         | 0.008247888        | BCL11B, PSEN2, BRAF, TGFBF1                                                                                                                                         | 148        | 57         | 20240        | 9.596965386        | 0.999997273        | 0.637974        | 0.636737        |
| GOTERM_        | GO:0010468~regulation of gene expression                                        | 10       | 6.289308176        | 0.008961644        | RARG, BCL11B, GDNF, NOVA1, NKAP, PAX6, GRHL2, TGFBF1, KDM6A, ZFP451                                                                                                 | 148        | 484        | 20240        | 2.825552826        | 0.999999105        | 0.660174        | 0.658894        |
| GOTERM_        | GO:0006915~apoptotic process                                                    | 12       | 7.547169811        | 0.009431792        | GREM1, MEF2A, RARG, RBM25, BCL11B, FEM1B, CASP2, CD47, CLPTM1L, FOXO3, TGFBF1, PPM1F                                                                                | 148        | 666        | 20240        | 2.464085707        | 0.99999957         | 0.663226        | 0.66194         |
| GOTERM_        | GO:0006606~protein import into nucleus                                          | 5        | 3.144654088        | 0.01051371         | MED1, PPP3R1, IPO9, NUP50, KPNB1                                                                                                                                    | 148        | 117        | 20240        | 5.844305844        | 0.999999921        | 0.678922        | 0.677606        |
| <b>GOTERM_</b> | <b>GO:0030182~neuron differentiation</b>                                        | <b>7</b> | <b>4.402515723</b> | <b>0.010532731</b> | <b>IRX2, GDNF, SHC1, NOVA2, PAX6, WNT2, WNT4</b>                                                                                                                    | <b>148</b> | <b>253</b> | <b>20240</b> | <b>3.783783784</b> | <b>0.999999923</b> | <b>0.678922</b> | <b>0.677606</b> |

|         |                                                                                                    |    |             |             |                                                                                                                                                  |     |      |       |             |             |          |          |
|---------|----------------------------------------------------------------------------------------------------|----|-------------|-------------|--------------------------------------------------------------------------------------------------------------------------------------------------|-----|------|-------|-------------|-------------|----------|----------|
| GOTERM_ | GO:0060324~face development                                                                        | 3  | 1.886792453 | 0.011003217 | RARG, BRAF, GRHL2                                                                                                                                | 148 | 22   | 20240 | 18.64864865 | 0.999999963 | 0.680879 | 0.679559 |
| GOTERM_ | GO:0007169~transmembrane receptor protein tyrosine kinase signaling pathway                        | 5  | 3.144654088 | 0.011784197 | ALK, GDNF, SHC1, FYN, SAMD12                                                                                                                     | 148 | 121  | 20240 | 5.651105651 | 0.999999989 | 0.701116 | 0.6998   |
| GOTERM_ | GO:0071539~protein localization to centrosome                                                      | 3  | 1.886792453 | 0.013022869 | CCDC14, CEP250, HOOK3                                                                                                                            | 148 | 24   | 20240 | 17.09459459 | 0.999999998 | 0.719514 | 0.718118 |
| GOTERM_ | GO:0032331~negative regulation of chondrocyte differentiation                                      | 3  | 1.886792453 | 0.013022869 | GREM1, RARG, TGFBR1                                                                                                                              | 148 | 24   | 20240 | 17.09459459 | 0.999999998 | 0.719514 | 0.718118 |
| GOTERM_ | GO:0006357~regulation of transcription from RNA polymerase II promoter                             | 21 | 13.20754717 | 0.014081574 | MEF2A, MED1, IRX2, CEBPA, BCL11B, PRRX1, ATP2B4, ARID5B, PAX6, ARID3A, EBF3, FOXO3, CHD2, GRHL2, ZBTB41, KLF7, ZFP36, ZEB1, LCOR, MDM4, ZKSCAN17 | 148 | 1627 | 20240 | 1.7651456   | 1           | 0.734372 | 0.732948 |
| GOTERM_ | GO:0031022~nuclear migration along microfilament                                                   | 2  | 1.257861635 | 0.014473299 | SUN2, SYNE2                                                                                                                                      | 148 | 2    | 20240 | 136.7567568 | 1           | 0.734372 | 0.732948 |
| GOTERM_ | GO:0043410~positive regulation of MAPK cascade                                                     | 6  | 3.773584906 | 0.015189801 | ALK, MAP2K3, SHC1, PRKCE, TGFBR1, CX3CL1                                                                                                         | 148 | 199  | 20240 | 4.123319299 | 1           | 0.734372 | 0.732948 |
| GOTERM_ | GO:0036120~cellular response to platelet-derived growth factor stimulus                            | 3  | 1.886792453 | 0.015190627 | PRKCE, RASA1, FYN                                                                                                                                | 148 | 26   | 20240 | 15.77962578 | 1           | 0.734372 | 0.732948 |
| GOTERM_ | GO:0007399~nervous system development                                                              | 9  | 5.660377358 | 0.016167941 | ALK, MEF2A, GAP43, ZEB1, GDNF, NOVA1, NOVA2, TGFBR1, MTSS1                                                                                       | 148 | 445  | 20240 | 2.765866991 | 1           | 0.742951 | 0.74151  |
| GOTERM_ | GO:0097150~neuronal stem cell population maintenance                                               | 3  | 1.886792453 | 0.016328587 | PRRX1, HOOK3, FOXO3                                                                                                                              | 148 | 27   | 20240 | 15.1951952  | 1           | 0.742951 | 0.74151  |
| GOTERM_ | GO:0048844~artery morphogenesis                                                                    | 3  | 1.886792453 | 0.018709815 | PRRX1, LDLR, TGFBR1                                                                                                                              | 148 | 29   | 20240 | 14.1472507  | 1           | 0.826974 | 0.82537  |
| GOTERM_ | GO:0060218~hematopoietic stem cell differentiation                                                 | 3  | 1.886792453 | 0.021227713 | MED1, ZFP36, CHD2                                                                                                                                | 148 | 31   | 20240 | 13.23452485 | 1           | 0.84708  | 0.845437 |
| GOTERM_ | GO:0043368~positive T cell selection                                                               | 2  | 1.257861635 | 0.021631735 | BCL11B, BRAF                                                                                                                                     | 148 | 3    | 20240 | 91.17117117 | 1           | 0.84708  | 0.845437 |
| GOTERM_ | GO:0072660~maintenance of protein location in plasma membrane                                      | 2  | 1.257861635 | 0.021631735 | ANK3, ADCY6                                                                                                                                      | 148 | 3    | 20240 | 91.17117117 | 1           | 0.84708  | 0.845437 |
| GOTERM_ | GO:0021817~nucleokinesis involved in cell motility in cerebral cortex radial glia guided migration | 2  | 1.257861635 | 0.021631735 | SUN2, SYNE2                                                                                                                                      | 148 | 3    | 20240 | 91.17117117 | 1           | 0.84708  | 0.845437 |
| GOTERM_ | GO:0060021~palate development                                                                      | 4  | 2.51572327  | 0.021902513 | PRRX1, INSIG2, ARID5B, TGFBR1                                                                                                                    | 148 | 82   | 20240 | 6.671061305 | 1           | 0.84708  | 0.845437 |
| GOTERM_ | GO:2001240~negative regulation of extrinsic apoptotic signaling pathway in absence of ligand       | 3  | 1.886792453 | 0.022536536 | GDNF, FYN, CX3CL1                                                                                                                                | 148 | 32   | 20240 | 12.82094595 | 1           | 0.850342 | 0.848693 |
| GOTERM_ | GO:0006470~protein dephosphorylation                                                               | 5  | 3.144654088 | 0.023937213 | PPP2CA, PPP3R1, PPM1L, PTPN9, PPM1F                                                                                                              | 148 | 150  | 20240 | 4.558558559 | 1           | 0.865208 | 0.86353  |
| GOTERM_ | GO:0045165~cell fate commitment                                                                    | 4  | 2.51572327  | 0.024049083 | GAP43, PAX6, WNT2, WNT4                                                                                                                          | 148 | 85   | 20240 | 6.435612083 | 1           | 0.865208 | 0.86353  |
| GOTERM_ | GO:0071333~cellular response to glucose stimulus                                                   | 4  | 2.51572327  | 0.025541189 | PPP2CA, NOX4, NPTX1, FOXO3                                                                                                                       | 148 | 87   | 20240 | 6.287666977 | 1           | 0.898005 | 0.896264 |
| GOTERM_ | GO:0050680~negative regulation of epithelial cell proliferation                                    | 4  | 2.51572327  | 0.027870794 | ZEB1, CELF1, PAX6, MTSS1                                                                                                                         | 148 | 90   | 20240 | 6.078078078 | 1           | 0.958136 | 0.956278 |
| GOTERM_ | GO:0030900~forebrain development                                                                   | 4  | 2.51572327  | 0.03199643  | ZEB1, PSEN2, FYN, PAX6                                                                                                                           | 148 | 95   | 20240 | 5.758179232 | 1           | 0.984806 | 0.982897 |
| GOTERM_ | GO:0042593~glucose homeostasis                                                                     | 5  | 3.144654088 | 0.033533354 | KLF7, CEBPA, PAX6, FOXO3, SIDT2                                                                                                                  | 148 | 167  | 20240 | 4.094513675 | 1           | 0.984806 | 0.982897 |
| GOTERM_ | GO:2001234~negative regulation of apoptotic signaling pathway                                      | 3  | 1.886792453 | 0.034133877 | PSEN2, CX3CL1, WNT4                                                                                                                              | 148 | 40   | 20240 | 10.25675676 | 1           | 0.984806 | 0.982897 |
| GOTERM_ | GO:0050729~positive regulation of inflammatory response                                            | 4  | 2.51572327  | 0.035514176 | CEBPA, CD47, LDLR, CX3CL1                                                                                                                        | 148 | 99   | 20240 | 5.525525526 | 1           | 0.984806 | 0.982897 |
| GOTERM_ | GO:0048701~embryonic cranial skeleton morphogenesis                                                | 3  | 1.886792453 | 0.035716678 | PRRX1, GRHL2, TGFBR1                                                                                                                             | 148 | 41   | 20240 | 10.00659196 | 1           | 0.984806 | 0.982897 |
| GOTERM_ | GO:0010730~negative regulation of hydrogen peroxide biosynthetic process                           | 2  | 1.257861635 | 0.035794043 | MPV17L, FYN                                                                                                                                      | 148 | 5    | 20240 | 54.7027027  | 1           | 0.984806 | 0.982897 |
| GOTERM_ | GO:0060676~ureteric bud formation                                                                  | 2  | 1.257861635 | 0.035794043 | GREM1, GDNF                                                                                                                                      | 148 | 5    | 20240 | 54.7027027  | 1           | 0.984806 | 0.982897 |
| GOTERM_ | GO:0001656~metanephros development                                                                 | 3  | 1.886792453 | 0.037327402 | IRX2, GDNF, WNT4                                                                                                                                 | 148 | 42   | 20240 | 9.768339768 | 1           | 0.984806 | 0.982897 |
| GOTERM_ | GO:0010634~positive regulation of epithelial cell migration                                        | 3  | 1.886792453 | 0.037327402 | ITGA3, PRKCE, PPM1F                                                                                                                              | 148 | 42   | 20240 | 9.768339768 | 1           | 0.984806 | 0.982897 |
| GOTERM_ | GO:1904646~cellular response to beta-amyloid                                                       | 3  | 1.886792453 | 0.038965567 | CACNB1, FYN, FOXO3                                                                                                                               | 148 | 43   | 20240 | 9.541169076 | 1           | 0.984806 | 0.982897 |
| GOTERM_ | GO:0008285~negative regulation of cell proliferation                                               | 8  | 5.031446541 | 0.038977699 | CEBPA, RARG, ZEB1, BCL11B, CELF1, NOX4, DHCR24, PAX6                                                                                             | 148 | 433  | 20240 | 2.526683728 | 1           | 0.984806 | 0.982897 |

|                |                                                                                       |          |                    |                    |                                                                 |            |            |              |                    |          |                 |                 |
|----------------|---------------------------------------------------------------------------------------|----------|--------------------|--------------------|-----------------------------------------------------------------|------------|------------|--------------|--------------------|----------|-----------------|-----------------|
| <b>GOTERM_</b> | <b>GO:0045664~regulation of neuron differentiation</b>                                | <b>3</b> | <b>1.886792453</b> | <b>0.040630695</b> | <b>ALK, BCL11B, PAX6</b>                                        | <b>148</b> | <b>44</b>  | <b>20240</b> | <b>9.324324324</b> | <b>1</b> | <b>0.984806</b> | <b>0.982897</b> |
| GOTERM_        | GO:0001933~negative regulation of protein phosphorylation                             | 4        | 2.51572327         | 0.041148746        | PPP2CA, MYADM, PSEN2, PAX6                                      | 148        | 105        | 20240        | 5.20978121         | 1        | 0.984806        | 0.982897        |
| <b>GOTERM_</b> | <b>GO:0007616~long-term memory</b>                                                    | <b>3</b> | <b>1.886792453</b> | <b>0.042322314</b> | <b>GRIA1, CHST10, LDLR</b>                                      | <b>148</b> | <b>45</b>  | <b>20240</b> | <b>9.117117117</b> | <b>1</b> | <b>0.984806</b> | <b>0.982897</b> |
| <b>GOTERM_</b> | <b>GO:1902667~regulation of axon guidance</b>                                         | <b>2</b> | <b>1.257861635</b> | <b>0.042798653</b> | <b>NOVA2, MYCBP2</b>                                            | <b>148</b> | <b>6</b>   | <b>20240</b> | <b>45.58558559</b> | <b>1</b> | <b>0.984806</b> | <b>0.982897</b> |
| GOTERM_        | GO:0071242~cellular response to ammonium ion                                          | 2        | 1.257861635        | 0.042798653        | GRIA1, SLC1A1                                                   | 148        | 6          | 20240        | 45.58558559        | 1        | 0.984806        | 0.982897        |
| <b>GOTERM_</b> | <b>GO:0031175~neuron projection development</b>                                       | <b>5</b> | <b>3.144654088</b> | <b>0.04313866</b>  | <b>EHD1, GDNF, SHC1, STMN2, FYN</b>                             | <b>148</b> | <b>181</b> | <b>20240</b> | <b>3.77781096</b>  | <b>1</b> | <b>0.984806</b> | <b>0.982897</b> |
| <b>GOTERM_</b> | <b>GO:1990090~cellular response to nerve growth factor stimulus</b>                   | <b>3</b> | <b>1.886792453</b> | <b>0.044039957</b> | <b>EHD1, STMN2, FOXO3</b>                                       | <b>148</b> | <b>46</b>  | <b>20240</b> | <b>8.918918919</b> | <b>1</b> | <b>0.984806</b> | <b>0.982897</b> |
| GOTERM_        | GO:0008284~positive regulation of cell proliferation                                  | 10       | 6.289308176        | 0.045233171        | GREM1, MED1, RARG, GDNF, SHC1, MDM4, CD47, WNT2, TGFBR1, CX3CL1 | 148        | 643        | 20240        | 2.126854693        | 1        | 0.984806        | 0.982897        |
| GOTERM_        | GO:0097192~extrinsic apoptotic signaling pathway in absence of ligand                 | 3        | 1.886792453        | 0.045783163        | CASP2, FOXO3, CX3CL1                                            | 148        | 47         | 20240        | 8.729154687        | 1        | 0.984806        | 0.982897        |
| GOTERM_        | GO:0001837~epithelial to mesenchymal transition                                       | 3        | 1.886792453        | 0.045783163        | PPP3R1, TGFBR1, WNT4                                            | 148        | 47         | 20240        | 8.729154687        | 1        | 0.984806        | 0.982897        |
| <b>GOTERM_</b> | <b>GO:0002088~lens development in camera-type eye</b>                                 | <b>3</b> | <b>1.886792453</b> | <b>0.045783163</b> | <b>MED1, PAX6, TGFBR1</b>                                       | <b>148</b> | <b>47</b>  | <b>20240</b> | <b>8.729154687</b> | <b>1</b> | <b>0.984806</b> | <b>0.982897</b> |
| GOTERM_        | GO:0030335~positive regulation of cell migration                                      | 6        | 3.773584906        | 0.04614881         | SUN2, MYADM, TGFBR1, CX3CL1, SYNE2, PPM1F                       | 148        | 268        | 20240        | 3.061718435        | 1        | 0.984806        | 0.982897        |
| GOTERM_        | GO:0060070~canonical Wnt signaling pathway                                            | 4        | 2.51572327         | 0.048256095        | FOXO3, WNT2, KDM6A, WNT4                                        | 148        | 112        | 20240        | 4.884169884        | 1        | 0.984806        | 0.982897        |
| GOTERM_        | GO:0071364~cellular response to epidermal growth factor stimulus                      | 3        | 1.886792453        | 0.049344442        | MED1, ZFP36, RASA1                                              | 148        | 49         | 20240        | 8.372862659        | 1        | 0.984806        | 0.982897        |
| <b>GOTERM_</b> | <b>GO:0021902~commitment of neuronal cell to specific neuron type in forebrain</b>    | <b>2</b> | <b>1.257861635</b> | <b>0.04975272</b>  | <b>BCL11B, PAX6</b>                                             | <b>148</b> | <b>7</b>   | <b>20240</b> | <b>39.07335907</b> | <b>1</b> | <b>0.984806</b> | <b>0.982897</b> |
| GOTERM_        | GO:0010894~negative regulation of steroid biosynthetic process                        | 2        | 1.257861635        | 0.04975272         | INSIG2, WNT4                                                    | 148        | 7          | 20240        | 39.07335907        | 1        | 0.984806        | 0.982897        |
| GOTERM_        | GO:0003337~mesenchymal to epithelial transition involved in metanephros morphogenesis | 2        | 1.257861635        | 0.04975272         | GREM1, GDNF                                                     | 148        | 7          | 20240        | 39.07335907        | 1        | 0.984806        | 0.982897        |
| <b>GOTERM_</b> | <b>GO:0007411~axon guidance</b>                                                       | <b>5</b> | <b>3.144654088</b> | <b>0.050791008</b> | <b>KLF7, GAP43, MYCBP2, PAX6, ANK3</b>                          | <b>148</b> | <b>191</b> | <b>20240</b> | <b>3.58001981</b>  | <b>1</b> | <b>0.984806</b> | <b>0.982897</b> |

**Table S22. KEGG pathway analysis of miR-183C targets in the TG of both SNS-CKO and miR-183C KO strains.**

| Category        | Term                                                            | Count    | %               | PValue          | Genes                                                                      | list Total | Pop Hit    | Pop Total   | d Enrichm       | Bonferroni      | Benjamini       | FDR             |
|-----------------|-----------------------------------------------------------------|----------|-----------------|-----------------|----------------------------------------------------------------------------|------------|------------|-------------|-----------------|-----------------|-----------------|-----------------|
| KEGG_PAT        | mmu04010:MAPK signaling pathway                                 | 10       | 6.289308        | 6.60E-04        | CACNB1, MAP2K3, MAP3K3, PPP3R1, GDNF, RASA1, CACNA2D2, BRAF, GNG12, TGFBR1 | 75         | 302        | 9212        | 4.067108        | 0.11957         | 0.127303        | 0.121366        |
| KEGG_PAT        | mmu04022:cGMP-PKG signaling pathway                             | 7        | 4.402516        | 0.002593        | MEF2A, PPP3R1, RGS2, GNA11, PRKCE, ATP2B4, ADCY6                           | 75         | 173        | 9212        | 4.969865        | 0.394151        | 0.250237        | 0.238568        |
| KEGG_PAT        | mmu04921:Oxytocin signaling pathway                             | 6        | 3.773585        | 0.007602        | CACNB1, PPP3R1, RGS2, KCNJ14, CACNA2D2, ADCY6                              | 75         | 153        | 9212        | 4.816732        | 0.770694        | 0.317871        | 0.303048        |
| KEGG_PAT        | mmu04925:Aldosterone synthesis and secretion                    | 5        | 3.144654        | 0.009015        | GNA11, PRKCE, ATP2B4, LDLR, ADCY6                                          | 75         | 102        | 9212        | 6.020915        | 0.825856        | 0.317871        | 0.303048        |
| KEGG_PAT        | mmu04934:Cushing syndrome                                       | 6        | 3.773585        | 0.009606        | GNA11, BRAF, LDLR, WNT2, ADCY6, WNT4                                       | 75         | 162        | 9212        | 4.549136        | 0.844788        | 0.317871        | 0.303048        |
| KEGG_PAT        | mmu04730:Long-term depression                                   | 4        | 2.515723        | 0.012273        | PPP2CA, GRIA1, GNA11, BRAF                                                 | 75         | 60         | 9212        | 8.188444        | 0.907759        | 0.317871        | 0.303048        |
| <b>KEGG_PAT</b> | <b>mmu04725:Cholinergic synapse</b>                             | <b>5</b> | <b>3.144654</b> | <b>0.012411</b> | <b>GNA11, KCNJ14, FYN, GNG12, ADCY6</b>                                    | <b>75</b>  | <b>112</b> | <b>9212</b> | <b>5.483333</b> | <b>0.910214</b> | <b>0.317871</b> | <b>0.303048</b> |
| <b>KEGG_PAT</b> | <b>mmu04724:Glutamatergic synapse</b>                           | <b>5</b> | <b>3.144654</b> | <b>0.013176</b> | <b>GRIA1, PPP3R1, SLC1A1, GNG12, ADCY6</b>                                 | <b>75</b>  | <b>114</b> | <b>9212</b> | <b>5.387135</b> | <b>0.922685</b> | <b>0.317871</b> | <b>0.303048</b> |
| <b>KEGG_PAT</b> | <b>mmu04722:Neurotrophin signaling pathway</b>                  | <b>5</b> | <b>3.144654</b> | <b>0.016088</b> | <b>MAP3K3, SHC1, PSEN2, BRAF, FOXO3</b>                                    | <b>75</b>  | <b>121</b> | <b>9212</b> | <b>5.075482</b> | <b>0.956295</b> | <b>0.345004</b> | <b>0.328916</b> |
| <b>KEGG_PAT</b> | <b>mmu04062:Chemokine signaling pathway</b>                     | <b>6</b> | <b>3.773585</b> | <b>0.018868</b> | <b>SHC1, BRAF, FOXO3, GNG12, CX3CL1, ADCY6</b>                             | <b>75</b>  | <b>192</b> | <b>9212</b> | <b>3.838333</b> | <b>0.974684</b> | <b>0.364151</b> | <b>0.34717</b>  |
| KEGG_PAT        | mmu04371:Apelin signaling pathway                               | 5        | 3.144654        | 0.024179        | MEF2A, PRKCE, GNG12, TGFBR1, ADCY6                                         | 75         | 137        | 9212        | 4.482725        | 0.99112         | 0.402853        | 0.384067        |
| KEGG_PAT        | mmu05200:Pathways in cancer                                     | 10       | 6.289308        | 0.029161        | ALK, CEBPA, ITGA3, GNA11, BRAF, GNG12, WNT2, TGFBR1, ADCY6, WNT4           | 75         | 543        | 9212        | 2.262001        | 0.996693        | 0.402853        | 0.384067        |
| KEGG_PAT        | mmu05226:Gastric cancer                                         | 5        | 3.144654        | 0.032293        | SHC1, BRAF, WNT2, TGFBR1, WNT4                                             | 75         | 150        | 9212        | 4.094222        | 0.998227        | 0.402853        | 0.384067        |
| KEGG_PAT        | mmu05235:PD-L1 expression and PD-1 checkpoint pathway in cancer | 4        | 2.515723        | 0.033583        | ALK, MAP2K3, MAP3K3, PPP3R1                                                | 75         | 88         | 9212        | 5.58303         | 0.99863         | 0.402853        | 0.384067        |
| KEGG_PAT        | mmu04512:ECM-receptor interaction                               | 4        | 2.515723        | 0.034559        | SV2C, ITGA3, CD47, NPNT                                                    | 75         | 89         | 9212        | 5.5203          | 0.998873        | 0.402853        | 0.384067        |
| KEGG_PAT        | mmu04912:GnRH signaling pathway                                 | 4        | 2.515723        | 0.03555         | MAP2K3, MAP3K3, GNA11, ADCY6                                               | 75         | 90         | 9212        | 5.458963        | 0.999075        | 0.402853        | 0.384067        |
| KEGG_PAT        | mmu04261:Adrenergic signaling in cardiomyocytes                 | 5        | 3.144654        | 0.036517        | CACNB1, PPP2CA, ATP2B4, CACNA2D2, ADCY6                                    | 75         | 156        | 9212        | 3.936752        | 0.999238        | 0.402853        | 0.384067        |
| KEGG_PAT        | mmu01522:Endocrine resistance                                   | 4        | 2.515723        | 0.03861         | MED1, SHC1, BRAF, ADCY6                                                    | 75         | 93         | 9212        | 5.282867        | 0.999499        | 0.402853        | 0.384067        |
| KEGG_PAT        | mmu05414:Dilated cardiomyopathy                                 | 4        | 2.515723        | 0.039659        | CACNB1, ITGA3, CACNA2D2, ADCY6                                             | 75         | 94         | 9212        | 5.226667        | 0.999594        | 0.402853        | 0.384067        |
| KEGG_PAT        | mmu05225:Hepatocellular carcinoma                               | 5        | 3.144654        | 0.051027        | SHC1, BRAF, WNT2, TGFBR1, WNT4                                             | 75         | 174        | 9212        | 3.529502        | 0.999959        | 0.492415        | 0.469453        |
| KEGG_PAT        | mmu04928:Parathyroid hormone synthesis, secretion and action    | 4        | 2.515723        | 0.05584         | MEF2A, GNA11, BRAF, ADCY6                                                  | 75         | 108        | 9212        | 4.549136        | 0.999985        | 0.503682        | 0.480194        |
| <b>KEGG_PAT</b> | <b>mmu04360:Axon guidance</b>                                   | <b>5</b> | <b>3.144654</b> | <b>0.057415</b> | <b>PPP3R1, RASA1, NCK2, FYN, WNT4</b>                                      | <b>75</b>  | <b>181</b> | <b>9212</b> | <b>3.393002</b> | <b>0.999989</b> | <b>0.503682</b> | <b>0.480194</b> |

**Table S23. Biological processes GO analysis of miR-183C targets in the cornea of both SNS-CKO and miR-183C KO strains.**

| Category | Term                                                                                         | Count | %        | PValue   | Genes                                                                                            | List Total | Pop Hits | Pop Total | Fold<br>Enrichment | Bonferroni | Benjamini | FDR      |
|----------|----------------------------------------------------------------------------------------------|-------|----------|----------|--------------------------------------------------------------------------------------------------|------------|----------|-----------|--------------------|------------|-----------|----------|
| GOTERM_  | GO:0007399~nervous system development                                                        | 13    | 8.496732 | 6.79E-05 | ROBO2, MEF2C, MBNL1, NRN1, MYT1L, AVIL, TSC1, RTN4, GRIP1, FUT9, NOVA2, DIP2A, PRKD1             | 142        | 445      | 20240     | 4.16395            | 0.0852317  | 0.0890814 | 0.08881  |
| GOTERM_  | GO:0010976~positive regulation of neuron projection development                              | 8     | 5.228758 | 3.21E-04 | ANKRD27, FUT9, AVIL, DAB2IP, CNTN1, FYN, PRKD1, CX3CL1                                           | 142        | 185      | 20240     | 6.163685           | 0.3437748  | 0.1558997 | 0.155424 |
| GOTERM_  | GO:0030182~neuron differentiation                                                            | 9     | 5.882353 | 4.05E-04 | SOX2, MAP2K1, MEF2C, FUT9, MYT1L, NOVA2, ELAVL4, HES1, RTN4                                      | 142        | 253      | 20240     | 5.070423           | 0.4118971  | 0.1558997 | 0.155424 |
| GOTERM_  | GO:0090649~response to oxygen-glucose deprivation                                            | 3     | 1.960784 | 4.75E-04 | SOX2, ZEB2, BNIP3                                                                                | 142        | 5        | 20240     | 85.52113           | 0.4640675  | 0.1558997 | 0.155424 |
| GOTERM_  | GO:0006915~apoptotic process                                                                 | 14    | 9.150327 | 7.88E-04 | MEF2C, PDCD6, BNIP3, DAB2IP, JADE1, AATK, PRKCA, UNC5D, NSG1, FOXO1, TOX3, ELMO1, PRKD1, CLPTM1L | 142        | 666      | 20240     | 2.996236           | 0.644364   | 0.206688  | 0.206058 |
| GOTERM_  | GO:0010595~positive regulation of endothelial cell migration                                 | 5     | 3.267974 | 9.78E-04 | ANXA3, PDCD6, PRKCA, PRKD1, RAC1                                                                 | 142        | 63       | 20240     | 11.31232           | 0.7228524  | 0.213763  | 0.213111 |
| GOTERM_  | GO:0007155~cell adhesion                                                                     | 13    | 8.496732 | 0.001191 | CD164, PRKCE, FIBCD1, PRKCA, CX3CL1, PCDH17, CELSR3, CNTN1, HES1, FAT3, TGFB1, RAC1, DGCR2       | 142        | 611      | 20240     | 3.032664           | 0.7906501  | 0.2232595 | 0.222579 |
| GOTERM_  | GO:0002062~chondrocyte differentiation                                                       | 5     | 3.267974 | 0.001374 | MEF2C, PRKCA, TGFB1, SLC39A14, SOX5                                                              | 142        | 69       | 20240     | 10.32864           | 0.8353118  | 0.2253078 | 0.224621 |
| GOTERM_  | GO:0010764~negative regulation of fibroblast migration                                       | 3     | 1.960784 | 0.002543 | ZEB2, RAC1, CYGB                                                                                 | 142        | 11       | 20240     | 38.87324           | 0.9646042  | 0.370768  | 0.369638 |
| GOTERM_  | GO:2000300~regulation of synaptic vesicle exocytosis                                         | 5     | 3.267974 | 0.002954 | NRN1, SV2C, PRKCE, PRKCA, CACNA1E                                                                | 142        | 85       | 20240     | 8.384424           | 0.9793664  | 0.3875102 | 0.386329 |
| GOTERM_  | GO:0055085~transmembrane transport                                                           | 10    | 6.535948 | 0.004592 | SLC25A1, CLCN5, SV2C, KCNH5, SLC7A14, SLC39A5, CACNA1E, SLC39A1, SLC39A14, SLC16A13              | 142        | 454      | 20240     | 3.139542           | 0.9976152  | 0.5059155 | 0.504373 |
| GOTERM_  | GO:0001764~neuron migration                                                                  | 6     | 3.921569 | 0.004744 | MEF2C, TRIM46, FYN, FAT3, RAC1, CELSR3                                                           | 142        | 156      | 20240     | 5.482124           | 0.9980483  | 0.5059155 | 0.504373 |
| GOTERM_  | GO:0035556~intracellular signal transduction                                                 | 10    | 6.535948 | 0.005066 | RAB40B, DUSP1, MAK, PRKCE, FYN, PRKCA, PRKD1, RAPGEF5, DGKK, TNS1                                | 142        | 461      | 20240     | 3.09187            | 0.9987239  | 0.5059155 | 0.504373 |
| GOTERM_  | GO:0048813~dendrite morphogenesis                                                            | 4     | 2.614379 | 0.005398 | KLF7, ELAVL4, FYN, RAC1                                                                          | 142        | 51       | 20240     | 11.17923           | 0.9991765  | 0.5059155 | 0.504373 |
| GOTERM_  | GO:0071577~zinc II ion transmembrane transport                                               | 3     | 1.960784 | 0.01016  | SLC39A5, SLC39A1, SLC39A14                                                                       | 142        | 22       | 20240     | 19.43662           | 0.9999985  | 0.8389759 | 0.836418 |
| GOTERM_  | GO:0007626~locomotory behavior                                                               | 5     | 3.267974 | 0.010231 | GMFB, ELAVL4, CNTN1, SOBP, CACNA1E                                                               | 142        | 121      | 20240     | 5.889885           | 0.9999986  | 0.8389759 | 0.836418 |
| GOTERM_  | GO:0006829~zinc II ion transport                                                             | 3     | 1.960784 | 0.013017 | SLC39A5, SLC39A1, SLC39A14                                                                       | 142        | 25       | 20240     | 17.10423           | 1          | 0.8609098 | 0.858285 |
| GOTERM_  | GO:1904520~regulation of myofibroblast cell apoptotic process                                | 2     | 1.30719  | 0.013885 | SOX2, ZEB2                                                                                       | 142        | 2        | 20240     | 142.5352           | 1          | 0.8609098 | 0.858285 |
| GOTERM_  | GO:0061178~regulation of insulin secretion involved in cellular response to glucose stimulus | 3     | 1.960784 | 0.014038 | PRKCE, CACNA1E, SIDT2                                                                            | 142        | 26       | 20240     | 16.44637           | 1          | 0.8609098 | 0.858285 |
| GOTERM_  | GO:0030030~cell projection organization                                                      | 6     | 3.921569 | 0.014212 | UBXN10, RAB34, GPR22, TSC1, FAM149B, TAPT1                                                       | 142        | 204      | 20240     | 4.192212           | 1          | 0.8609098 | 0.858285 |
| GOTERM_  | GO:0090090~negative regulation of canonical Wnt signaling pathway                            | 5     | 3.267974 | 0.0148   | SOX2, DAB2IP, JADE1, TMEM170B, FOXO1                                                             | 142        | 135      | 20240     | 5.279082           | 1          | 0.8609098 | 0.858285 |
| GOTERM_  | GO:0097150~neuronal stem cell population maintenance                                         | 3     | 1.960784 | 0.015092 | SOX2, HES1, FOXO1                                                                                | 142        | 27       | 20240     | 15.83725           | 1          | 0.8609098 | 0.858285 |
| GOTERM_  | GO:0030001~metal ion transport                                                               | 3     | 1.960784 | 0.015092 | SLC39A5, SLC39A1, SLC39A14                                                                       | 142        | 27       | 20240     | 15.83725           | 1          | 0.8609098 | 0.858285 |
| GOTERM_  | GO:0022409~positive regulation of cell-cell adhesion                                         | 3     | 1.960784 | 0.01618  | SOX2, MAGI1, PDE4D                                                                               | 142        | 28       | 20240     | 15.27163           | 1          | 0.8844902 | 0.881794 |
| GOTERM_  | GO:0030517~negative regulation of axon extension                                             | 3     | 1.960784 | 0.0173   | TRIM46, AATK, RTN4                                                                               | 142        | 29       | 20240     | 14.74502           | 1          | 0.907891  | 0.905123 |

|                |                                                                                 |          |                 |                 |                                                                                                           |            |            |              |                 |          |                  |                 |
|----------------|---------------------------------------------------------------------------------|----------|-----------------|-----------------|-----------------------------------------------------------------------------------------------------------|------------|------------|--------------|-----------------|----------|------------------|-----------------|
| GOTERM_        | GO:0050730~regulation of peptidyl-tyrosine phosphorylation                      | 3        | 1.960784        | 0.019635        | PRKCE, FYN, PRKCA                                                                                         | 142        | 31         | 20240        | 13.79373        | 1        | 0.973244         | 0.970277        |
| GOTERM_        | GO:0016239~positive regulation of macroautophagy                                | 3        | 1.960784        | 0.02085         | BNIP3, GNAI3, TSC1                                                                                        | 142        | 32         | 20240        | 13.36268        | 1        | 0.973244         | 0.970277        |
| GOTERM_        | GO:0007275~multicellular organism development                                   | 15       | 9.803922        | 0.021099        | ROBO2, PAQR8, MEF2C, MYT1L, DAB2IP, EBF1, UNC5D, IKZF1, CELSR3, SOX2, DIP2A, FAT3, FYN, HOXD8, TAPT1      | 142        | 1098       | 20240        | 1.947202        | 1        | 0.973244         | 0.970277        |
| GOTERM_        | GO:0045165~cell fate commitment                                                 | 4        | 2.614379        | 0.021585        | SOX2, MEF2C, HES1, SOX5                                                                                   | 142        | 85         | 20240        | 6.707539        | 1        | 0.973244         | 0.970277        |
| <b>GOTERM_</b> | <b>GO:0048812~neuron projection morphogenesis</b>                               | <b>4</b> | <b>2.614379</b> | <b>0.022254</b> | <b>MAP2K1, ANKRD27, DAB2IP, RAC1</b>                                                                      | <b>142</b> | <b>86</b>  | <b>20240</b> | <b>6.629545</b> | <b>1</b> | <b>0.973244</b>  | <b>0.970277</b> |
| <b>GOTERM_</b> | <b>GO:0010977~negative regulation of neuron projection development</b>          | <b>4</b> | <b>2.614379</b> | <b>0.024328</b> | <b>TSC1, HES1, RTN4, PTPRG</b>                                                                            | <b>142</b> | <b>89</b>  | <b>20240</b> | <b>6.406077</b> | <b>1</b> | <b>0.9896694</b> | <b>0.986652</b> |
| GOTERM_        | GO:0006811~ion transport                                                        | 10       | 6.535948        | 0.025461        | P2RX6, CLCN5, KCNH5, CACNA2D1, SLC39A5, CACNA1E, SLC39A1, SLC39A14, GRIA3, ATP6V1C1                       | 142        | 603        | 20240        | 2.363768        | 1        | 0.9896694        | 0.986652        |
| GOTERM_        | GO:0045766~positive regulation of angiogenesis                                  | 5        | 3.267974        | 0.02682         | ANXA3, PDCD6, PRKCA, PRKD1, RTN4                                                                          | 142        | 162        | 20240        | 4.399235        | 1        | 0.9896694        | 0.986652        |
| GOTERM_        | GO:0061512~protein localization to cilium                                       | 3        | 1.960784        | 0.027372        | TUB, ARF4, FAM149B                                                                                        | 142        | 37         | 20240        | 11.55691        | 1        | 0.9896694        | 0.986652        |
| <b>GOTERM_</b> | <b>GO:0060164~regulation of timing of neuron differentiation</b>                | <b>2</b> | <b>1.30719</b>  | <b>0.027578</b> | <b>HES1, SOX5</b>                                                                                         | <b>142</b> | <b>4</b>   | <b>20240</b> | <b>71.26761</b> | <b>1</b> | <b>0.9896694</b> | <b>0.986652</b> |
| GOTERM_        | GO:0007015~actin filament organization                                          | 5        | 3.267974        | 0.02842         | TPM2, AVIL, ELMO1, TAGLN3, RAC1                                                                           | 142        | 165        | 20240        | 4.319249        | 1        | 0.9896694        | 0.986652        |
| <b>GOTERM_</b> | <b>GO:0030900~forebrain development</b>                                         | <b>4</b> | <b>2.614379</b> | <b>0.028779</b> | <b>SOX2, FYN, RAC1, IKZF1</b>                                                                             | <b>142</b> | <b>95</b>  | <b>20240</b> | <b>6.001483</b> | <b>1</b> | <b>0.9896694</b> | <b>0.986652</b> |
| GOTERM_        | GO:0045944~positive regulation of transcription from RNA polymerase II promoter | 16       | 10.45752        | 0.029042        | ARF4, MEF2C, MYT1L, DAB2IP, EBF1, ESRRG, IKZF1, FOXO1, CX3CL1, SOX2, TOX3, KLF7, ZEB2, HES1, PRKD1, HOXD8 | 142        | 1257       | 20240        | 1.814291        | 1        | 0.9896694        | 0.986652        |
| GOTERM_        | GO:0042593~glucose homeostasis                                                  | 5        | 3.267974        | 0.029419        | KLF7, MAP2K1, CACNA1E, FOXO1, SIDT2                                                                       | 142        | 167        | 20240        | 4.267521        | 1        | 0.9896694        | 0.986652        |
| <b>GOTERM_</b> | <b>GO:0048870~cell motility</b>                                                 | <b>3</b> | <b>1.960784</b> | <b>0.030182</b> | <b>MAP2K1, ELMO1, RAC1</b>                                                                                | <b>142</b> | <b>39</b>  | <b>20240</b> | <b>10.96425</b> | <b>1</b> | <b>0.9896694</b> | <b>0.986652</b> |
| <b>GOTERM_</b> | <b>GO:0050772~positive regulation of axonogenesis</b>                           | <b>3</b> | <b>1.960784</b> | <b>0.033101</b> | <b>ROBO2, ZEB2, MAP2K1</b>                                                                                | <b>142</b> | <b>41</b>  | <b>20240</b> | <b>10.42941</b> | <b>1</b> | <b>1</b>         | <b>0.997712</b> |
| GOTERM_        | GO:0045893~positive regulation of transcription, DNA-templated                  | 11       | 7.189542        | 0.03333         | SOX2, TOX3, KLF7, MAP2K1, MEF2C, MTA1, EBF1, HES1, ESRRG, IKZF1, FOXO1                                    | 142        | 736        | 20240        | 2.130282        | 1        | 1                | 0.997712        |
| GOTERM_        | GO:0035437~maintenance of protein localization in endoplasmic reticulum         | 2        | 1.30719         | 0.034353        | KDEL2, TAPT1                                                                                              | 142        | 5          | 20240        | 57.01408        | 1        | 1                | 0.997712        |
| GOTERM_        | GO:0016236~macroautophagy                                                       | 3        | 1.960784        | 0.037676        | GABARAPL2, MAP1LC3B, YOD1                                                                                 | 142        | 44         | 20240        | 9.71831         | 1        | 1                | 0.997712        |
| GOTERM_        | GO:0006890~retrograde vesicle-mediated transport, Golgi to ER                   | 3        | 1.960784        | 0.037676        | ARF4, GOLPH3L, KDEL2                                                                                      | 142        | 44         | 20240        | 9.71831         | 1        | 1                | 0.997712        |
| GOTERM_        | GO:0036324~vascular endothelial growth factor receptor-2 signaling pathway      | 2        | 1.30719         | 0.041082        | PDCD6, DAB2IP                                                                                             | 142        | 6          | 20240        | 47.51174        | 1        | 1                | 0.997712        |
| GOTERM_        | GO:1901998~toxin transport                                                      | 3        | 1.960784        | 0.044127        | RAB40B, BNIP3, PTPRG                                                                                      | 142        | 48         | 20240        | 8.908451        | 1        | 1                | 0.997712        |
| GOTERM_        | GO:0071902~positive regulation of protein serine/threonine kinase activity      | 3        | 1.960784        | 0.044127        | DAZAP2, MAP2K1, DAB2IP                                                                                    | 142        | 48         | 20240        | 8.908451        | 1        | 1                | 0.997712        |
| <b>GOTERM_</b> | <b>GO:0007411~axon guidance</b>                                                 | <b>5</b> | <b>3.267974</b> | <b>0.044784</b> | <b>ROBO2, KLF7, CNTN1, UNC5D, RAC1</b>                                                                    | <b>142</b> | <b>191</b> | <b>20240</b> | <b>3.731288</b> | <b>1</b> | <b>1</b>         | <b>0.997712</b> |
| GOTERM_        | GO:0042177~negative regulation of protein catabolic process                     | 3        | 1.960784        | 0.047495        | DAB2IP, FYN, AZIN1                                                                                        | 142        | 50         | 20240        | 8.552113        | 1        | 1                | 0.997712        |
| GOTERM_        | GO:0045933~positive regulation of muscle contraction                            | 2        | 1.30719         | 0.047764        | MAP2K1, CACNA2D1                                                                                          | 142        | 7          | 20240        | 40.72435        | 1        | 1                | 0.997712        |
| <b>GOTERM_</b> | <b>GO:0051402~neuron apoptotic process</b>                                      | <b>4</b> | <b>2.614379</b> | <b>0.048499</b> | <b>BNIP3, AATK, SNCB, CTSB</b>                                                                            | <b>142</b> | <b>117</b> | <b>20240</b> | <b>4.872999</b> | <b>1</b> | <b>1</b>         | <b>0.997712</b> |



**Table S24. KEGG pathway analysis of miR-183C targets in the cornea of both SNS-CKO and miR-183C KO strains.**

| Category | Term                                                                | Count | %        | PValue   | Genes                                                | List Total | Pop Hits | Pop Total | Fold Enrichment | Bonferro ni | Benjamin i | FDR      |
|----------|---------------------------------------------------------------------|-------|----------|----------|------------------------------------------------------|------------|----------|-----------|-----------------|-------------|------------|----------|
| KEGG_PAT | mmu04071:Sphingolipid signaling pathway                             | 7     | 4.575163 | 1.59E-04 | MAP2K1, PRKCE, GNAI3, FYN, PRKCA, RAC1, SGM52        | 61         | 126      | 9212      | 8.3898          | 0.030688    | 0.031166   | 0.028781 |
| KEGG_PAT | mmu04360:Axon guidance                                              | 7     | 4.575163 | 0.0011   | ROBO2, GNAI3, FYN, PRKCA, UNC5D, RAC1, SSH2          | 61         | 181      | 9212      | 5.840413        | 0.194023    | 0.101113   | 0.093374 |
| KEGG_PAT | mmu04371:Apelin signaling pathway                                   | 6     | 3.921569 | 0.001917 | MAP1LC3B, MAP2K1, MEF2C, GNG5, PRKCE, GNAI3          | 61         | 137      | 9212      | 6.613857        | 0.313435    | 0.101113   | 0.093374 |
| KEGG_PAT | mmu04140:Autophagy - animal                                         | 6     | 3.921569 | 0.002243 | GABARAPL2, MAP1LC3B, MAP2K1, BNIP3, TSC1, CTSB       | 61         | 142      | 9212      | 6.380974        | 0.356031    | 0.101113   | 0.093374 |
| KEGG_PAT | mmu04015:Rap1 signaling pathway                                     | 7     | 4.575163 | 0.002579 | MAG1, MAP2K1, GNAI3, PRKCA, PRKD1, RAC1, RAPGEF5     | 61         | 214      | 9212      | 4.939789        | 0.397228    | 0.101113   | 0.093374 |
| KEGG_PAT | mmu05231:Choline metabolism in cancer                               | 5     | 3.267974 | 0.003724 | MAP2K1, TSC1, PRKCA, RAC1, DGKK                      | 61         | 98       | 9212      | 7.704918        | 0.518682    | 0.121644   | 0.112335 |
| KEGG_PAT | mmu04928:Parathyroid hormone synthesis, secretion and action        | 5     | 3.267974 | 0.005265 | MAP2K1, MEF2C, PDE4D, GNAI3, PRKCA                   | 61         | 108      | 9212      | 6.9915          | 0.644641    | 0.134959   | 0.12463  |
| KEGG_PAT | mmu04725:Cholinergic synapse                                        | 5     | 3.267974 | 0.005985 | MAP2K1, GNG5, GNAI3, FYN, PRKCA                      | 61         | 112      | 9212      | 6.741803        | 0.691686    | 0.134959   | 0.12463  |
| KEGG_PAT | mmu05163:Human cytomegalovirus infection                            | 7     | 4.575163 | 0.006197 | MAP2K1, GNG5, GNAI3, TSC1, PRKCA, RAC1, CX3CL1       | 61         | 256      | 9212      | 4.129355        | 0.704299    | 0.134959   | 0.12463  |
| KEGG_PAT | mmu04730:Long-term depression                                       | 4     | 2.614379 | 0.006908 | MAP2K1, GNAI3, PRKCA, GRIA3                          | 61         | 60       | 9212      | 10.06776        | 0.743001    | 0.135399   | 0.125036 |
| KEGG_PAT | mmu04062:Chemokine signaling pathway                                | 6     | 3.921569 | 0.008069 | MAP2K1, GNG5, ELMO1, GNAI3, RAC1, CX3CL1             | 61         | 192      | 9212      | 4.719262        | 0.795637    | 0.143768   | 0.132765 |
| KEGG_PAT | mmu04664:Fc epsilon RI signaling pathway                            | 4     | 2.614379 | 0.008987 | MAP2K1, FYN, PRKCA, RAC1                             | 61         | 66       | 9212      | 9.152509        | 0.829564    | 0.146786   | 0.135553 |
| KEGG_PAT | mmu04726:Serotonergic synapse                                       | 5     | 3.267974 | 0.010306 | MAP2K1, GNG5, DUSP1, GNAI3, PRKCA                    | 61         | 131      | 9212      | 5.763984        | 0.868737    | 0.15539    | 0.143498 |
| KEGG_PAT | mmu00601:Glycosphingolipid biosynthesis - lacto and neolacto series | 3     | 1.960784 | 0.012263 | FUT9, B3GALT1, ST3GAL6                               | 61         | 26       | 9212      | 17.42497        | 0.910939    | 0.171684   | 0.158545 |
| KEGG_PAT | mmu04010:MAPK signaling pathway                                     | 7     | 4.575163 | 0.013393 | MAP2K1, MEF2C, DUSP1, CACNA2D1, PRKCA, RAC1, CACNA1E | 61         | 302      | 9212      | 3.50038         | 0.928835    | 0.175002   | 0.161609 |
| KEGG_PAT | mmu04072:Phospholipase D signaling pathway                          | 5     | 3.267974 | 0.015914 | MAP2K1, TSC1, FYN, PRKCA, DGKK                       | 61         | 149      | 9212      | 5.067664        | 0.956901    | 0.194947   | 0.180028 |
| KEGG_PAT | mmu04921:Oxytocin signaling pathway                                 | 5     | 3.267974 | 0.017377 | MAP2K1, MEF2C, CACNA2D1, GNAI3, PRKCA                | 61         | 153      | 9212      | 4.935176        | 0.967798    | 0.200341   | 0.185009 |
| KEGG_PAT | mmu04727:GABAergic synapse                                          | 4     | 2.614379 | 0.020078 | GABARAPL2, GNG5, GNAI3, PRKCA                        | 61         | 89       | 9212      | 6.787254        | 0.981226    | 0.218625   | 0.201894 |
| KEGG_PAT | mmu05032:Morphine addiction                                         | 4     | 2.614379 | 0.021283 | GNG5, PDE4D, GNAI3, PRKCA                            | 61         | 91       | 9212      | 6.638083        | 0.985251    | 0.219556   | 0.202753 |
| KEGG_PAT | mmu04666:Fc gamma R-mediated phagocytosis                           | 4     | 2.614379 | 0.022528 | MAP2K1, PRKCE, PRKCA, RAC1                           | 61         | 93       | 9212      | 6.495329        | 0.988507    | 0.220777   | 0.20388  |
| KEGG_PAT | mmu04713:Circadian entrainment                                      | 4     | 2.614379 | 0.025811 | GNG5, GNAI3, PRKCA, GRIA3                            | 61         | 98       | 9212      | 6.163934        | 0.994056    | 0.240904   | 0.222468 |
| KEGG_PAT | mmu04933:AGE-RAGE signaling pathway in diabetic complications       | 4     | 2.614379 | 0.027898 | PRKCE, PRKCA, RAC1, FOXO1                            | 61         | 101      | 9212      | 5.980847        | 0.996096    | 0.248548   | 0.229526 |
| KEGG_PAT | mmu04724:Glutamatergic synapse                                      | 4     | 2.614379 | 0.037951 | GNG5, GNAI3, PRKCA, GRIA3                            | 61         | 114      | 9212      | 5.298821        | 0.999491    | 0.323412   | 0.298661 |
| KEGG_PAT | mmu04650:Natural killer cell mediated cytotoxicity                  | 4     | 2.614379 | 0.039642 | MAP2K1, FYN, PRKCA, RAC1                             | 61         | 116      | 9212      | 5.207462        | 0.99964     | 0.323745   | 0.298969 |
| KEGG_PAT | mmu04670:Leukocyte transendothelial migration                       | 4     | 2.614379 | 0.041371 | GNAI3, MSN, PRKCA, RAC1                              | 61         | 118      | 9212      | 5.1192          | 0.999747    | 0.324349   | 0.299527 |

**Table S25. miR-183C target genes identified in the CRMCs in miR-183C conventional KO mice**

|               | logFC       | logCPM      | PValue      | WT   | KO   |
|---------------|-------------|-------------|-------------|------|------|
| 2310022B05Rik | 7.231048112 | 3.736955525 | 1.5823E-18  | 1    | 242  |
| Al314180      | 6.573937181 | 2.372838111 | 0.00143701  | 0    | 14   |
| Abca1         | 10.97607693 | 4.028589272 | 1.68103E-21 | 0    | 299  |
| Abl1          | 13.03577642 | 6.337087454 | 8.9812E-36  | 0    | 1247 |
| Ablim1        | 12.2435095  | 7.384718763 | 4.19122E-30 | 0    | 720  |
| Actr2         | 5.383979384 | 6.719408347 | 2.55726E-24 | 28   | 1717 |
| Ahr           | 11.90908098 | 5.625730749 | 9.03997E-28 | 0    | 571  |
| Amotl2        | 10.92202762 | 3.635958559 | 3.71851E-21 | 0    | 288  |
| Anxa3         | 13.19962853 | 6.229897996 | 5.81888E-37 | 0    | 1397 |
| Aph1a         | 11.87068524 | 4.307042048 | 1.6338E-27  | 0    | 556  |
| Appl1         | 9.560625516 | 5.772024489 | 4.12739E-13 | 0    | 112  |
| Arcn1         | 11.16137982 | 4.013834788 | 1.03204E-22 | 0    | 340  |
| Arhgdia       | 11.05787647 | 8.38729483  | 2.00064E-44 | 1    | 3436 |
| Arhgef12      | 8.70608081  | 5.419677652 | 2.53585E-28 | 1    | 673  |
| Arhgef18      | 12.61422634 | 7.051975209 | 9.61495E-33 | 0    | 931  |
| Arhgef3       | 13.13306242 | 7.040913601 | 1.76808E-36 | 0    | 1334 |
| Arid4a        | 8.559579656 | 6.61415195  | 2.57093E-27 | 1    | 608  |
| Arl10         | 12.16318443 | 5.140615095 | 1.52377E-29 | 0    | 681  |
| Arpc1b        | 1.588441032 | 11.18900024 | 0.000163053 | 1979 | 8709 |
| Arrdc3        | 11.46267656 | 5.977067833 | 1.03963E-24 | 0    | 419  |
| Asap1         | 10.74655227 | 6.451868412 | 4.73969E-20 | 0    | 255  |
| Ash2l         | 12.22536592 | 4.994081091 | 5.52736E-30 | 0    | 711  |
| Atp13a3       | 12.27717036 | 4.66607867  | 2.43167E-30 | 0    | 737  |
| Atxn7         | 12.15255521 | 4.334259075 | 1.79916E-29 | 0    | 676  |
| Azin1         | 4.905470962 | 6.511323752 | 1.85188E-20 | 23   | 1013 |
| Basp1         | 5.070947327 | 7.040008099 | 1.45621E-22 | 33   | 1628 |
| Baz1b         | 12.1842108  | 6.795630623 | 1.09657E-29 | 0    | 691  |
| Bicd2         | 13.15772175 | 5.172511581 | 1.17124E-36 | 0    | 1357 |
| Braf          | 8.777019161 | 5.828788074 | 2.40073E-09 | 0    | 65   |
| Bre           | 12.92272147 | 5.698353812 | 5.93757E-35 | 0    | 1153 |
| Btg1          | 9.79737522  | 6.941988362 | 2.04048E-14 | 0    | 132  |
| Bzw1          | 9.03950534  | 6.053790526 | 1.5162E-10  | 0    | 78   |
| C2cd2         | 13.21911571 | 5.178426976 | 4.17392E-37 | 0    | 1416 |
| Cacna1b       | 9.338551471 | 1.225034255 | 5.39633E-12 | 0    | 96   |
| Cald1         | 12.09598436 | 7.219200341 | 4.57838E-29 | 0    | 650  |
| Camk2n1       | 12.49476024 | 7.011712067 | 6.79243E-32 | 0    | 857  |
| Camkk2        | 10.8020157  | 6.465726399 | 2.1694E-20  | 0    | 265  |
| Cand1         | 12.88212054 | 5.7837639   | 1.15188E-34 | 0    | 1121 |
| Capns1        | 13.22115177 | 8.956843947 | 4.08873E-37 | 0    | 1418 |
| Casd1         | 12.20904448 | 5.521423344 | 7.31206E-30 | 0    | 703  |
| Ccdc50        | 11.31034778 | 5.95232094  | 1.03633E-23 | 0    | 377  |
| Ccng2         | 12.33847724 | 5.455729531 | 8.78956E-31 | 0    | 769  |
| Cd2ap         | 6.468186381 | 6.039041642 | 0.002434933 | 0    | 13   |
| Cd47          | 11.26764398 | 7.674874057 | 1.97681E-23 | 0    | 366  |
| Cdc37         | 14.74328756 | 8.030815771 | 2.48405E-48 | 0    | 4073 |
| Cdc42bpg      | 11.96360842 | 3.97433951  | 3.81663E-28 | 0    | 593  |
| Cdc42se1      | 13.15239676 | 7.532341836 | 1.27661E-36 | 0    | 1352 |
| Cdsn          | 8.798995637 | 0.754843559 | 1.8437E-09  | 0    | 66   |
| Celf1         | 12.98994095 | 7.432178092 | 1.916E-35   | 0    | 1208 |
| Celf2         | 13.08132167 | 8.76881608  | 4.20845E-36 | 0    | 1287 |
| Cers5         | 13.93260339 | 6.984314278 | 2.48826E-42 | 0    | 2322 |
| Chd2          | 13.38630466 | 6.131117756 | 2.52081E-38 | 0    | 1590 |

|           |             |             |             |      |       |
|-----------|-------------|-------------|-------------|------|-------|
| Chmp1a    | 12.21722828 | 7.493118362 | 6.2292E-30  | 0    | 707   |
| Cited2    | 6.202980071 | 5.962195396 | 1.06754E-25 | 9    | 981   |
| Cnot6     | 12.6372817  | 6.509792385 | 6.65973E-33 | 0    | 946   |
| Coro1c    | 13.50720493 | 7.802664761 | 3.29356E-39 | 0    | 1729  |
| Cpeb4     | 10.01014639 | 4.218213945 | 1.39302E-15 | 0    | 153   |
| Creb3l1   | 11.28721163 | 5.248782832 | 1.48053E-23 | 0    | 371   |
| Creb3l2   | 11.0047266  | 5.661305968 | 1.09307E-21 | 0    | 305   |
| Crebrf    | 11.9853344  | 5.549943486 | 2.62603E-28 | 0    | 602   |
| Crk       | 12.219267   | 6.088721576 | 6.2292E-30  | 0    | 708   |
| Csad      | 12.06684474 | 5.517859594 | 7.08314E-29 | 0    | 637   |
| Csnk1d    | 13.11565607 | 7.517966579 | 2.35286E-36 | 0    | 1318  |
| Csnk2a1   | 11.29496498 | 5.830137297 | 1.37802E-23 | 0    | 373   |
| Ctdsp1    | 12.46242095 | 6.15390255  | 1.16461E-31 | 0    | 838   |
| Ctnnd1    | 12.42404675 | 5.662602949 | 2.16664E-31 | 0    | 816   |
| Cttn      | 6.724236137 | 5.044156079 | 2.21057E-29 | 9    | 1408  |
| Cux1      | 13.57005967 | 7.00005907  | 1.15432E-39 | 0    | 1806  |
| Cxadr     | 12.53787111 | 4.321927056 | 3.40538E-32 | 0    | 883   |
| Cyb5b     | 14.00056034 | 6.980702988 | 7.90847E-43 | 0    | 2434  |
| D17Wsu92e | 12.79458922 | 7.216015769 | 4.97253E-34 | 0    | 1055  |
| Dagla     | 13.10135712 | 5.180461169 | 3.00413E-36 | 0    | 1305  |
| Dap       | 1.002746871 | 5.618689546 | 0.019281544 | 253  | 742   |
| Dazap2    | 13.62414801 | 8.895253196 | 4.63643E-40 | 0    | 1875  |
| Dcaf12    | 10.76341633 | 7.281188364 | 3.88953E-20 | 0    | 258   |
| Ddah1     | 12.38825262 | 4.823042842 | 3.95106E-31 | 0    | 796   |
| Ddx6      | 6.468186381 | 7.531516453 | 0.002434933 | 0    | 13    |
| Denr      | 13.2533438  | 7.002236092 | 2.35804E-37 | 0    | 1450  |
| Dgcr2     | 12.20699126 | 5.198901298 | 7.61223E-30 | 0    | 702   |
| Dhcr24    | 11.51340369 | 4.341726136 | 4.55073E-25 | 0    | 434   |
| Dixdc1    | 12.1114345  | 3.986749434 | 3.53648E-29 | 0    | 657   |
| Dusp1     | 0.873979545 | 8.30121228  | 0.037944936 | 519  | 1392  |
| Dyrk2     | 13.42832835 | 6.229237038 | 1.24068E-38 | 0    | 1637  |
| Edem1     | 13.18092097 | 6.855632816 | 7.97776E-37 | 0    | 1379  |
| Egr1      | 0.86459479  | 9.833102797 | 0.036797413 | 3821 | 10181 |
| Ehd1      | 12.75859433 | 7.239758055 | 8.89709E-34 | 0    | 1029  |
| Eif3j1    | 12.20904448 | 5.634452955 | 7.31206E-30 | 0    | 703   |
| Eif4a2    | 12.84695172 | 6.135344993 | 2.04661E-34 | 0    | 1094  |
| Eif4e2    | 10.13634555 | 6.542804072 | 2.45694E-16 | 0    | 167   |
| Ell       | 5.777895307 | 4.590456779 | 0.022676824 | 0    | 8     |
| Emc7      | 13.13630285 | 6.291953284 | 1.65602E-36 | 0    | 1337  |
| Eny2      | 9.229497657 | 5.153704014 | 1.94396E-11 | 0    | 89    |
| Ep300     | 12.15041993 | 6.123786088 | 1.87579E-29 | 0    | 675   |
| Epas1     | 12.70867644 | 5.801706612 | 2.03298E-33 | 0    | 994   |
| Ephb1     | 7.010519164 | 4.303697398 | 0.000193974 | 0    | 19    |
| Erlin1    | 12.80819774 | 4.820786773 | 3.89103E-34 | 0    | 1065  |
| Exoc4     | 7.712450153 | 4.029604379 | 2.40377E-06 | 0    | 31    |
| Fam134b   | 9.683851328 | 5.118408069 | 9.584E-14   | 0    | 122   |
| Fam171a1  | 10.019536   | 1.853564145 | 1.19985E-15 | 0    | 154   |
| Fam49b    | 11.76858071 | 7.833439629 | 8.51021E-27 | 0    | 518   |
| Fbxw11    | 3.375530668 | 5.179620715 | 3.45558E-12 | 46   | 700   |
| Flrt3     | 12.78910966 | 4.570684643 | 5.39902E-34 | 0    | 1051  |
| Fnbp1     | 11.4899528  | 8.41068537  | 6.64061E-25 | 0    | 427   |
| Fnta      | 11.55273908 | 5.907587186 | 2.45432E-25 | 0    | 446   |
| Foxp1     | 13.89100518 | 8.715216753 | 5.06729E-42 | 0    | 2256  |
| Foxq1     | 12.93020856 | 4.890350251 | 5.23753E-35 | 0    | 1159  |

|          |             |             |             |    |      |
|----------|-------------|-------------|-------------|----|------|
| Fyn      | 3.74158897  | 5.14017635  | 2.72474E-10 | 9  | 178  |
| Gap43    | 7.010519164 | 4.634385849 | 0.000193974 | 0  | 19   |
| Gbp7     | 11.99963873 | 5.522373081 | 2.08464E-28 | 0  | 608  |
| Gcnt1    | 12.65696927 | 6.299826233 | 4.77845E-33 | 0  | 959  |
| Gmfb     | 11.65267383 | 6.699625582 | 5.27521E-26 | 0  | 478  |
| Gnai3    | 7.403759936 | 5.223953566 | 1.95811E-05 | 0  | 25   |
| Gorasp1  | 13.34302006 | 5.122682432 | 5.22887E-38 | 0  | 1543 |
| Grb2     | 5.07481805  | 7.963590904 | 1.32599E-19 | 13 | 646  |
| Grhl2    | 11.22769401 | 3.812753858 | 3.83594E-23 | 0  | 356  |
| Hdac7    | 12.33472094 | 7.514909447 | 9.46441E-31 | 0  | 767  |
| Hecw2    | 6.573937181 | 3.245760123 | 0.00143701  | 0  | 14   |
| Hilpda   | 6.672462944 | 3.810977769 | 0.00085757  | 0  | 15   |
| Hn1      | 11.72045325 | 6.228820411 | 1.81566E-26 | 0  | 501  |
| Hnrnpa1  | 5.832448629 | 5.90236687  | 1.23268E-21 | 7  | 592  |
| Hsph1    | 14.53605444 | 6.857325164 | 8.56513E-47 | 0  | 3528 |
| Idh2     | 12.35340537 | 6.279294166 | 7.04944E-31 | 0  | 777  |
| Ids      | 13.85539963 | 7.296981552 | 9.20874E-42 | 0  | 2201 |
| Igsf3    | 12.24551145 | 4.555119048 | 4.02977E-30 | 0  | 721  |
| Ikzf1    | 8.279571054 | 8.006039381 | 2.50562E-07 | 0  | 46   |
| Insig1   | 5.777895307 | 4.469976659 | 0.022676824 | 0  | 8    |
| Insig2   | 11.29882608 | 4.896497484 | 1.28287E-23 | 0  | 374  |
| Irf2bpl  | 12.99946256 | 6.875642823 | 1.65933E-35 | 0  | 1216 |
| Irf6     | 13.58040647 | 5.931192292 | 9.65478E-40 | 0  | 1819 |
| Itgb1    | 12.70285998 | 7.229850592 | 2.21792E-33 | 0  | 990  |
| Its2     | 13.10246209 | 7.066026385 | 2.93784E-36 | 0  | 1306 |
| Jam2     | 12.97794989 | 4.81849104  | 2.32404E-35 | 0  | 1198 |
| Jmjd1c   | 12.28302983 | 6.002666944 | 2.16722E-30 | 0  | 740  |
| Kat7     | 11.86808882 | 5.466648402 | 1.71749E-27 | 0  | 555  |
| Kctd15   | 11.04206207 | 2.872043148 | 6.05682E-22 | 0  | 313  |
| Kdm5a    | 11.85765617 | 6.24976358  | 1.99639E-27 | 0  | 551  |
| Kif13a   | 11.52992396 | 5.953380845 | 3.54834E-25 | 0  | 439  |
| Klhl7    | 8.613029204 | 4.697007045 | 1.24346E-08 | 0  | 58   |
| Kmt2a    | 8.004913702 | 7.05113311  | 2.40483E-07 | 0  | 38   |
| Kpnb1    | 10.89677399 | 6.736246364 | 5.33577E-21 | 0  | 283  |
| Kras     | 9.912727715 | 5.997696034 | 4.7536E-15  | 0  | 143  |
| Ktn1     | 13.41860217 | 6.468552971 | 1.48517E-38 | 0  | 1626 |
| L1cam    | 9.695614235 | 5.687713749 | 8.0319E-14  | 0  | 123  |
| Lamc1    | 12.23949727 | 6.043757902 | 4.3594E-30  | 0  | 718  |
| Larp4    | 9.623553668 | 4.038083351 | 1.96785E-13 | 0  | 117  |
| Lpp      | 8.637628806 | 5.118567783 | 9.38231E-09 | 0  | 59   |
| Lrrc8c   | 12.40088183 | 5.45156528  | 3.19083E-31 | 0  | 803  |
| Lrrk1    | 9.323468035 | 4.57274873  | 6.65137E-12 | 0  | 95   |
| Lsm14a   | 12.90256383 | 6.298823246 | 8.25191E-35 | 0  | 1137 |
| Ltn1     | 11.9972645  | 5.593941681 | 2.18278E-28 | 0  | 607  |
| Magi1    | 10.22017439 | 2.044123359 | 8.23326E-17 | 0  | 177  |
| Mal2     | 14.60433637 | 6.728297246 | 2.67384E-47 | 0  | 3699 |
| Map1lc3b | 11.81784773 | 8.454956168 | 3.8732E-27  | 0  | 536  |
| Map2k1   | 11.85503617 | 6.629708021 | 2.09951E-27 | 0  | 550  |
| Map2k3   | 2.360892363 | 6.977097897 | 2.77729E-07 | 82 | 617  |
| Map4k5   | 11.79888774 | 5.150470484 | 5.29089E-27 | 0  | 529  |
| Mapre1   | 12.88725858 | 8.48556611  | 1.06613E-34 | 0  | 1125 |
| Marcks   | 7.460015749 | 8.650910541 | 1.26863E-05 | 0  | 26   |
| Mark2    | 12.3004668  | 6.644915586 | 1.66004E-30 | 0  | 749  |
| Mast4    | 6.573937181 | 5.648314625 | 0.00143701  | 0  | 14   |

|          |             |             |             |    |      |
|----------|-------------|-------------|-------------|----|------|
| Mbn1     | 3.503634621 | 8.306539018 | 4.10083E-13 | 51 | 848  |
| Mdp1     | 12.76698091 | 6.189826562 | 7.73665E-34 | 0  | 1035 |
| Med1     | 6.573937181 | 4.502672988 | 0.00143701  | 0  | 14   |
| Meis2    | 6.094555017 | 1.255360712 | 0.007243414 | 0  | 10   |
| Mfsd5    | 14.04376592 | 6.873615686 | 3.75876E-43 | 0  | 2508 |
| Mgat2    | 13.27310505 | 5.910642619 | 1.71137E-37 | 0  | 1470 |
| Morc3    | 10.82361749 | 4.763764852 | 1.62835E-20 | 0  | 269  |
| Mospd2   | 7.616709141 | 3.436800498 | 3.60565E-06 | 0  | 29   |
| Mpp1     | 11.53647947 | 5.773611227 | 3.13616E-25 | 0  | 441  |
| Mta1     | 10.01014639 | 6.270729068 | 1.39302E-15 | 0  | 153  |
| Mtch2    | 12.23547385 | 6.23198788  | 4.71717E-30 | 0  | 716  |
| Mtdh     | 13.03808815 | 7.839708296 | 8.57226E-36 | 0  | 1249 |
| Mttr12   | 13.15239676 | 6.901141325 | 1.27661E-36 | 0  | 1352 |
| Muc15    | 10.11897901 | 1.94776503  | 3.25398E-16 | 0  | 165  |
| Myadm    | 12.40626069 | 6.667184415 | 2.97265E-31 | 0  | 806  |
| Myo1c    | 12.26537953 | 7.266876157 | 2.94955E-30 | 0  | 731  |
| Naa50    | 12.06457866 | 6.519694982 | 7.4022E-29  | 0  | 636  |
| Nampt    | 11.64055406 | 5.580078161 | 6.26929E-26 | 0  | 474  |
| Nap1l1   | 13.40702241 | 7.976205397 | 1.78015E-38 | 0  | 1613 |
| Ndr1     | 6.851370265 | 5.11161698  | 0.000315208 | 0  | 17   |
| Nfic     | 12.27325078 | 6.629548586 | 2.5271E-30  | 0  | 735  |
| Nop9     | 11.97330483 | 4.935098788 | 3.16363E-28 | 0  | 597  |
| Npc2     | 14.11118995 | 8.962349112 | 1.19769E-43 | 0  | 2628 |
| Npm1     | 9.753031766 | 8.346732033 | 4.01056E-14 | 0  | 128  |
| Nr4a3    | 10.5788509  | 5.878465851 | 5.79007E-19 | 0  | 227  |
| Nsd1     | 12.2574651  | 7.253611915 | 3.31421E-30 | 0  | 727  |
| Nudt4    | 13.61952435 | 7.103936915 | 5.01603E-40 | 0  | 1869 |
| Nus1     | 11.17824632 | 5.511616319 | 8.18434E-23 | 0  | 344  |
| Ogt      | 7.5787818   | 6.052881362 | 9.6529E-21  | 1  | 308  |
| Pafah1b1 | 11.93907839 | 7.077485528 | 5.57861E-28 | 0  | 583  |
| Paip2    | 12.91267786 | 6.385082877 | 6.90796E-35 | 0  | 1145 |
| Parm1    | 12.02083275 | 4.846992786 | 1.51423E-28 | 0  | 617  |
| Pax6     | 12.27128699 | 6.649848343 | 2.62644E-30 | 0  | 734  |
| Pcnx     | 8.182597729 | 4.186665988 | 6.64018E-07 | 0  | 43   |
| Pfn1     | 8.904120519 | 5.698565414 | 6.58751E-10 | 0  | 71   |
| Phf20l1  | 6.933138139 | 5.381016816 | 0.000315208 | 0  | 18   |
| Phf21a   | 13.91006227 | 7.491721562 | 3.65835E-42 | 0  | 2286 |
| Phip     | 11.11395372 | 6.194267735 | 2.09679E-22 | 0  | 329  |
| Pik3ap1  | 6.573937181 | 4.539831758 | 0.00143701  | 0  | 14   |
| Pkp4     | 12.88854024 | 5.373955087 | 1.03904E-34 | 0  | 1126 |
| Plekha3  | 7.403759936 | 4.577685328 | 1.95811E-05 | 0  | 25   |
| Plet1    | 15.50125939 | 8.31311048  | 5.54898E-54 | 0  | 6888 |
| Pmepa1   | 10.97607693 | 6.969468189 | 1.68103E-21 | 0  | 299  |
| Pn1sr    | 11.59103038 | 7.273859694 | 1.34353E-25 | 0  | 458  |
| Pou2f2   | 6.230137985 | 7.782813683 | 0.007243414 | 0  | 11   |
| Ppm1l    | 5.589001617 | 4.487756612 | 0.040964585 | 0  | 7    |
| Ppp1r12c | 13.2533438  | 6.745092238 | 2.35804E-37 | 0  | 1450 |
| Ppp1r14b | 14.29010483 | 6.394212891 | 5.6872E-45  | 0  | 2975 |
| Ppp2ca   | 12.56056188 | 6.934255246 | 2.31453E-32 | 0  | 897  |
| Ppp2cb   | 6.573937181 | 1.779889373 | 0.00143701  | 0  | 14   |
| Ppp2r5c  | 9.534665043 | 6.171206367 | 6.02775E-13 | 0  | 110  |
| Ppp3ca   | 9.85095401  | 7.625329808 | 1.05675E-14 | 0  | 137  |
| Prdm1    | 11.29109351 | 4.664396657 | 1.37802E-23 | 0  | 372  |
| Prkacb   | 8.661815978 | 6.401437227 | 7.10124E-09 | 0  | 60   |

|           |             |             |             |      |      |
|-----------|-------------|-------------|-------------|------|------|
| Prkar1a   | 13.25731776 | 7.754130689 | 2.2198E-37  | 0    | 1454 |
| Prkcz     | 9.623553668 | 1.867352691 | 1.96785E-13 | 0    | 117  |
| Prrx1     | 10.12768841 | 6.531554734 | 2.8264E-16  | 0    | 166  |
| Ptdss1    | 13.13089807 | 6.654472553 | 1.84715E-36 | 0    | 1332 |
| Ptpn1     | 12.23345792 | 8.78812142  | 4.90738E-30 | 0    | 715  |
| Pura      | 13.43973902 | 9.17701804  | 1.03777E-38 | 0    | 1650 |
| Pygo2     | 14.03915694 | 6.986782705 | 4.08357E-43 | 0    | 2500 |
| Qk        | 10.24440178 | 6.518345018 | 6.31015E-17 | 0    | 180  |
| Rab21     | 12.10041559 | 5.783275188 | 4.19955E-29 | 0    | 652  |
| Rab2a     | 13.29453428 | 7.455819986 | 1.17576E-37 | 0    | 1492 |
| Rab35     | 12.14828149 | 5.262244456 | 1.95581E-29 | 0    | 674  |
| Rabgap1   | 13.53365972 | 6.168001241 | 2.12534E-39 | 0    | 1761 |
| Rac1      | 6.372885246 | 8.546555054 | 5.76764E-29 | 14   | 1710 |
| Rad23b    | 13.07907823 | 7.315573005 | 4.3048E-36  | 0    | 1285 |
| Rala      | 13.19134399 | 7.092141099 | 6.59856E-37 | 0    | 1389 |
| Rap2b     | 11.1313805  | 5.121078685 | 1.65182E-22 | 0    | 333  |
| Rap2c     | 11.77967525 | 6.012241765 | 6.88204E-27 | 0    | 522  |
| Rbms1     | 13.55076071 | 8.291566101 | 1.60258E-39 | 0    | 1782 |
| Rbmx      | 6.468186381 | 4.546033125 | 0.002434933 | 0    | 13   |
| Rcn2      | 8.078633437 | 2.336425103 | 1.29886E-06 | 0    | 40   |
| Rcor1     | 8.114127181 | 5.947225854 | 9.26662E-07 | 0    | 41   |
| Reps2     | 12.20904448 | 4.119141231 | 7.31206E-30 | 0    | 703  |
| Rere      | 9.79737522  | 7.825657538 | 2.04048E-14 | 0    | 132  |
| Rfxap     | 5.944895804 | 4.186174973 | 0.012730848 | 0    | 9    |
| Rhob      | 14.00056034 | 7.397227733 | 7.90847E-43 | 0    | 2434 |
| Rimkla    | 7.802231021 | 0.398672071 | 1.08934E-06 | 0    | 33   |
| Rnf130    | 6.933138139 | 4.321871218 | 0.000315208 | 0    | 18   |
| Rnf208    | 8.310499164 | 1.517102093 | 1.82531E-07 | 0    | 47   |
| Rora      | 12.91393714 | 6.574981237 | 6.73543E-35 | 0    | 1146 |
| Rps12     | 1.203394176 | 11.29236823 | 0.003911722 | 2558 | 8620 |
| Rsu1      | 12.25349154 | 6.236063587 | 3.58311E-30 | 0    | 725  |
| Rtn4      | 13.99343047 | 8.077876388 | 8.82665E-43 | 0    | 2422 |
| Rufy1     | 8.732035672 | 5.905687107 | 4.10498E-09 | 0    | 63   |
| Sar1a     | 5.944895804 | 6.476902366 | 0.012730848 | 0    | 9    |
| Sbds      | 13.27015806 | 6.129651953 | 1.78093E-37 | 0    | 1467 |
| Scaf11    | 11.82857117 | 5.730833112 | 3.3187E-27  | 0    | 540  |
| Scyl2     | 7.802231021 | 5.56667275  | 1.08934E-06 | 0    | 33   |
| Sdc2      | 12.17163179 | 5.591360995 | 1.34622E-29 | 0    | 685  |
| Sec11a    | 12.57017829 | 6.900421587 | 1.97399E-32 | 0    | 903  |
| Secisbp2l | 12.60333976 | 5.450829061 | 1.15766E-32 | 0    | 924  |
| Serp1     | 14.69905004 | 9.190370523 | 5.26991E-48 | 0    | 3950 |
| Sgk3      | 12.94506718 | 5.97401295  | 4.08297E-35 | 0    | 1171 |
| Sgms1     | 13.12655962 | 5.686848428 | 1.97271E-36 | 0    | 1328 |
| Sidt2     | 8.114127181 | 6.688521104 | 9.26662E-07 | 0    | 41   |
| Skil      | 9.730338228 | 5.252126069 | 4.76242E-14 | 0    | 126  |
| Slc10a3   | 12.67787504 | 4.761338071 | 3.34321E-33 | 0    | 973  |
| Slc22a23  | 12.89110014 | 5.580886289 | 9.86989E-35 | 0    | 1128 |
| Slc25a1   | 10.72375577 | 6.733482424 | 7.0716E-20  | 0    | 251  |
| Slc25a51  | 11.21549006 | 5.897342247 | 4.45554E-23 | 0    | 353  |
| Slc35d1   | 11.91160472 | 4.53623369  | 8.61033E-28 | 0    | 572  |
| Slco3a1   | 7.460015749 | 4.905567905 | 1.26863E-05 | 0    | 26   |
| Slmo2     | 11.69723723 | 5.061620792 | 2.53038E-26 | 0    | 493  |
| Snx16     | 8.661815978 | 3.802947791 | 7.10124E-09 | 0    | 60   |
| Socs6     | 8.215651735 | 4.400209755 | 4.77852E-07 | 0    | 44   |

|           |             |             |             |     |      |
|-----------|-------------|-------------|-------------|-----|------|
| Socs7     | 8.114127181 | 5.374363317 | 9.26662E-07 | 0   | 41   |
| Soga1     | 11.07845566 | 3.973092462 | 3.69137E-22 | 0   | 321  |
| Sowahc    | 11.48318194 | 4.594478648 | 7.54177E-25 | 0   | 425  |
| Spcs2     | 9.338551471 | 6.45703588  | 5.39633E-12 | 0   | 96   |
| Spen      | 12.78223082 | 6.589495331 | 6.02767E-34 | 0   | 1046 |
| Sppl2a    | 9.19676297  | 6.232815798 | 3.02494E-11 | 0   | 87   |
| Srsf2     | 13.58119931 | 7.252422507 | 9.49986E-40 | 0   | 1820 |
| St8sia3   | 8.732035672 | 0.698669956 | 4.10498E-09 | 0   | 63   |
| Strbp     | 9.671991724 | 8.089517281 | 9.584E-14   | 0   | 121  |
| Sypl      | 13.17042209 | 6.296544593 | 9.45547E-37 | 0   | 1369 |
| Taok1     | 11.71757159 | 6.334419154 | 1.91834E-26 | 0   | 500  |
| Tapt1     | 13.10907416 | 6.145876462 | 2.62848E-36 | 0   | 1312 |
| Tbl1x     | 7.616709141 | 5.097311046 | 3.60565E-06 | 0   | 29   |
| Tcf12     | 6.573937181 | 6.033958982 | 0.00143701  | 0   | 14   |
| Tcf4      | 6.666173212 | 8.52693618  | 1.0259E-25  | 5   | 758  |
| Tes       | 7.460015749 | 4.394898581 | 1.26863E-05 | 0   | 26   |
| Tgfbfr1   | 11.99963873 | 6.099834531 | 2.08464E-28 | 0   | 608  |
| Tle4      | 13.14598073 | 6.406576085 | 1.42233E-36 | 0   | 1346 |
| Tmbim6    | 6.838268483 | 8.648322304 | 3.78581E-34 | 23  | 3868 |
| Tmcc3     | 13.24235862 | 5.885658446 | 2.82909E-37 | 0   | 1439 |
| Tmed7     | 11.67661215 | 4.871798646 | 3.54224E-26 | 0   | 486  |
| Tmem126a  | 11.87327699 | 4.965647624 | 1.55434E-27 | 0   | 557  |
| Tmem203   | 12.74733585 | 5.061916404 | 1.08342E-33 | 0   | 1021 |
| Tmem57    | 12.2294176  | 5.739201958 | 5.10558E-30 | 0   | 713  |
| Tmpo      | 11.76300128 | 6.980801372 | 8.97675E-27 | 0   | 516  |
| Tmx1      | 10.47347312 | 6.819072421 | 2.51342E-18 | 0   | 211  |
| Tnk2      | 11.37395438 | 5.858732494 | 3.91851E-24 | 0   | 394  |
| Tnrc6a    | 14.13622274 | 8.252118639 | 7.82653E-44 | 0   | 2674 |
| Tnrc6b    | 12.19874901 | 7.06552533  | 8.59205E-30 | 0   | 698  |
| Tpd52     | 1.495104539 | 7.886730309 | 0.000626543 | 158 | 652  |
| Tram1     | 3.947182838 | 7.450669638 | 8.17449E-14 | 19  | 431  |
| Trim2     | 14.00883422 | 6.130441811 | 6.83616E-43 | 0   | 2448 |
| Trp53inp2 | 13.05530911 | 5.252760689 | 6.49304E-36 | 0   | 1264 |
| Tsc1      | 12.26537953 | 4.961532801 | 2.94955E-30 | 0   | 731  |
| Tsc22d3   | 11.58471866 | 7.525351939 | 1.51384E-25 | 0   | 456  |
| Tsnax     | 14.26219645 | 6.711028119 | 9.13869E-45 | 0   | 2918 |
| Tspan14   | 10.47347312 | 5.557725763 | 2.51342E-18 | 0   | 211  |
| Ttyh3     | 1.497702365 | 7.123496373 | 0.000673244 | 134 | 554  |
| Ube2k     | 12.5653781  | 6.478187806 | 2.17151E-32 | 0   | 900  |
| Ube2r2    | 13.63945405 | 8.46437149  | 3.55452E-40 | 0   | 1895 |
| Ubn2      | 5.101365421 | 6.926851224 | 8.8188E-20  | 13  | 658  |
| Uck2      | 12.14828149 | 5.567819856 | 1.95581E-29 | 0   | 674  |
| Usp2      | 8.661815978 | 2.072739783 | 7.10124E-09 | 0   | 60   |
| Usp36     | 8.383160344 | 6.269136517 | 4.26124E-26 | 1   | 538  |
| Usp47     | 12.25944778 | 6.148040192 | 3.18771E-30 | 0   | 728  |
| Vat1      | 11.72619934 | 4.65406378  | 1.62707E-26 | 0   | 503  |
| Vmac      | 13.01009979 | 5.576631636 | 1.37152E-35 | 0   | 1225 |
| Wasf2     | 13.0183193  | 7.426882244 | 1.19005E-35 | 0   | 1232 |
| Wdr26     | 8.712496139 | 8.337551213 | 2.23808E-28 | 1   | 676  |
| Wdr5      | 7.403759936 | 5.325269881 | 1.95811E-05 | 0   | 25   |
| Wdr76     | 2.421287185 | 2.533014666 | 0.002142368 | 4   | 32   |
| Whsc1l1   | 9.89242896  | 6.098196097 | 6.52344E-15 | 0   | 141  |
| Wisp1     | 13.26819005 | 5.267367076 | 1.85344E-37 | 0   | 1465 |
| Wnt4      | 8.39949382  | 4.582075431 | 9.79951E-08 | 0   | 50   |

|         |             |             |             |   |      |
|---------|-------------|-------------|-------------|---|------|
| Ywhae   | 14.88101169 | 8.871541142 | 2.33579E-49 | 0 | 4481 |
| Ywhag   | 14.15604729 | 7.664205495 | 5.6219E-44  | 0 | 2711 |
| Zcchc14 | 12.9189633  | 4.999641543 | 6.24422E-35 | 0 | 1150 |
| Zdhhc20 | 11.27941639 | 5.329102882 | 1.71005E-23 | 0 | 369  |
| Zeb2    | 12.30431323 | 5.925662123 | 1.53909E-30 | 0 | 751  |
| Zfp292  | 6.764688096 | 5.405020324 | 0.000517265 | 0 | 16   |
| Zfp322a | 12.08484635 | 4.949967352 | 5.44654E-29 | 0 | 645  |

---



**Table S26. miR-183C target genes identified in the CRMCs in miR-183C MS-CKO mice**

|               | logFC       | logCPM      | PValue      | WT  | MS-CKO |
|---------------|-------------|-------------|-------------|-----|--------|
| 0610007P14Rik | 9.784783276 | 5.716488848 | 2.41191E-14 | 0   | 125    |
| 1810011O10Rik | 12.69409719 | 3.795705157 | 2.1544E-33  | 0   | 940    |
| 2310022B05Rik | 11.85941    | 3.736955525 | 1.6338E-27  | 0   | 527    |
| 2810403A07Rik | 4.442439223 | 5.622321719 | 4.88917E-17 | 21  | 602    |
| 4931406P16Rik | 11.51482316 | 3.728926072 | 3.77519E-25 | 0   | 415    |
| Abca1         | 10.14056927 | 4.028589272 | 2.13744E-16 | 0   | 160    |
| Ablim1        | 13.84605727 | 7.384718763 | 8.84527E-42 | 0   | 2089   |
| Actr2         | 10.84051733 | 6.719408347 | 1.11639E-20 | 0   | 260    |
| Acvr1         | 13.23325412 | 4.553462932 | 2.71657E-37 | 0   | 1366   |
| Adam10        | 12.52841318 | 5.686544826 | 3.29679E-32 | 0   | 838    |
| Adcy6         | 12.43233341 | 3.618978778 | 1.58543E-31 | 0   | 784    |
| Adra2c        | 11.64753502 | 2.845008756 | 4.70479E-26 | 0   | 455    |
| Aebp2         | 13.05713034 | 5.794828702 | 5.16324E-36 | 0   | 1209   |
| Aff4          | 2.029786224 | 5.819154059 | 2.51278E-06 | 477 | 2556   |
| Agap3         | 4.348094439 | 4.336392674 | 6.66251E-16 | 17  | 457    |
| Ago3          | 8.510313517 | 4.67165944  | 1.81013E-26 | 1   | 530    |
| Akap7         | 4.8231367   | 2.944239656 | 7.67243E-16 | 8   | 301    |
| Aktip         | 11.07069886 | 3.942250942 | 3.40217E-22 | 0   | 305    |
| Amd1          | 13.35956433 | 4.905813384 | 3.26759E-38 | 0   | 1491   |
| Ammecr1l      | 6.916815087 | 5.048044162 | 0.000315208 | 0   | 17     |
| Ank3          | 13.17507052 | 4.250226348 | 7.17808E-37 | 0   | 1312   |
| Ankrd13c      | 11.65701313 | 3.137551241 | 4.19824E-26 | 0   | 458    |
| App1          | 11.38775665 | 5.772024489 | 2.79363E-24 | 0   | 380    |
| Arcn1         | 6.169895158 | 4.013834788 | 2.2085E-16  | 2   | 199    |
| Arel1         | 9.560741089 | 4.441970521 | 4.12739E-13 | 0   | 107    |
| Arf4          | 5.913009883 | 7.537454534 | 4.56491E-30 | 82  | 6491   |
| Arhgap17      | 12.88364263 | 6.115195632 | 9.13944E-35 | 0   | 1072   |
| Arhgdia       | 14.75919579 | 8.38729483  | 1.52678E-48 | 0   | 3934   |
| Arhgef12      | 13.17836525 | 5.419677652 | 6.73872E-37 | 0   | 1315   |
| Arhgef18      | 11.79790734 | 7.051975209 | 4.52468E-27 | 0   | 505    |
| Arhgef3       | 8.949566504 | 7.040913601 | 2.69457E-11 | 0   | 70     |
| Arid4a        | 13.64957364 | 6.61415195  | 2.45426E-40 | 0   | 1823   |
| Arid4b        | 1.520701673 | 6.314558789 | 0.000403572 | 273 | 1028   |
| Arid5b        | 12.77176514 | 5.830361347 | 5.86369E-34 | 0   | 992    |
| Armc1         | 12.17961732 | 6.023548844 | 9.70371E-30 | 0   | 658    |
| Arpp19        | 12.37414036 | 6.89915064  | 4.09505E-31 | 0   | 753    |
| Atad2b        | 13.50398724 | 6.218799229 | 2.87591E-39 | 0   | 1648   |
| Atf2          | 9.895693432 | 4.357427697 | 5.56586E-15 | 0   | 135    |
| Atf7ip        | 12.36453059 | 6.370556462 | 4.72787E-31 | 0   | 748    |
| Atg7          | 10.08547751 | 4.404813397 | 4.32335E-16 | 0   | 154    |
| Atl2          | 11.88920527 | 4.082610459 | 1.04678E-27 | 0   | 538    |
| Atp13a3       | 9.664631256 | 4.66607867  | 9.584E-14   | 0   | 115    |
| Atp2b4        | 5.718732351 | 4.184690819 | 7.44324E-21 | 7   | 491    |
| Atrn          | 12.91821126 | 4.246872642 | 5.23753E-35 | 0   | 1098   |
| Atxn1         | 7.286067663 | 4.377692178 | 3.04594E-05 | 0   | 22     |

|         |             |             |             |      |       |
|---------|-------------|-------------|-------------|------|-------|
| Atxn1   | 12.59073563 | 4.843868091 | 1.15766E-32 | 0    | 875   |
| Azin1   | 13.88690753 | 6.511323752 | 4.38827E-42 | 0    | 2149  |
| B4galt6 | 11.85117607 | 5.743677786 | 1.89854E-27 | 0    | 524   |
| Basp1   | 0.851126078 | 7.040008099 | 0.040922529 | 1153 | 2729  |
| Baz1b   | 13.42667229 | 6.795630623 | 1.05641E-38 | 0    | 1562  |
| Bcat2   | 12.76885397 | 5.224858749 | 6.19642E-34 | 0    | 990   |
| Bcl11b  | 1.495562499 | 3.436496663 | 0.000689284 | 134  | 496   |
| Bcl2    | 13.40433538 | 6.559396035 | 1.53981E-38 | 0    | 1538  |
| Bcl2l11 | 1.315025361 | 6.185781686 | 0.002323644 | 211  | 689   |
| Bcl2l13 | 5.139184529 | 5.275487135 | 1.17752E-23 | 47   | 2178  |
| Bcl6    | 13.37974031 | 6.906510453 | 2.2992E-38  | 0    | 1512  |
| Bhlhe41 | 10.1224381  | 2.185904865 | 2.8264E-16  | 0    | 158   |
| Bmi1    | 9.123731766 | 3.994685864 | 5.96009E-11 | 0    | 79    |
| Bnc2    | 8.727660335 | 0.442569242 | 2.96087E-10 | 0    | 60    |
| Bnip3   | 12.46687357 | 4.441530822 | 8.8812E-32  | 0    | 803   |
| Bnip3l  | 11.64436177 | 5.784114615 | 4.98152E-26 | 0    | 454   |
| Bod1l   | 11.92886826 | 5.59342072  | 5.57861E-28 | 0    | 553   |
| Braf    | 12.78190826 | 5.828788074 | 4.97253E-34 | 0    | 999   |
| Bre     | 5.80245348  | 5.698353812 | 3.11306E-10 | 1    | 81    |
| Brpf3   | 11.52865736 | 4.191002355 | 3.13616E-25 | 0    | 419   |
| Btg1    | 12.76885397 | 6.941988362 | 6.19642E-34 | 0    | 990   |
| Cacnb4  | 12.33531111 | 4.379799616 | 7.58575E-31 | 0    | 733   |
| Camk2n1 | 1.884709973 | 7.011712067 | 9.53605E-06 | 1222 | 5921  |
| Camkk2  | 0.996927805 | 6.465726399 | 0.030255908 | 79   | 207   |
| Capns1  | 1.308968277 | 8.956843947 | 0.001729153 | 3501 | 11381 |
| Cask    | 11.5926168  | 3.143118644 | 1.12449E-25 | 0    | 438   |
| Cav1    | 9.664631256 | 2.844755125 | 9.584E-14   | 0    | 115   |
| Cbx5    | 13.83357319 | 6.053163818 | 1.08253E-41 | 0    | 2071  |
| Ccbe1   | 10.96274382 | 2.244535092 | 1.83379E-21 | 0    | 283   |
| Ccdc88a | 5.071948629 | 5.228057389 | 1.47147E-20 | 18   | 799   |
| Ccdc88c | 11.59590581 | 7.403523787 | 1.06002E-25 | 0    | 439   |
| Ccnd2   | 0.868485222 | 8.118379211 | 0.036858262 | 1292 | 3095  |
| Ccny    | 12.22067684 | 5.482809687 | 4.90738E-30 | 0    | 677   |
| Cd164   | 13.59391224 | 7.836589261 | 6.26082E-40 | 0    | 1754  |
| Cd47    | 12.26060006 | 7.674874057 | 2.62644E-30 | 0    | 696   |
| Cdk12   | 10.23641147 | 5.425381122 | 5.53007E-17 | 0    | 171   |
| Cdk5r1  | 11.47250634 | 4.921630183 | 7.54177E-25 | 0    | 403   |
| Cdo1    | 4.637872829 | 3.950541081 | 2.93931E-19 | 31   | 1016  |
| Cdv3    | 13.78252767 | 5.823014274 | 2.57539E-41 | 0    | 1999  |
| Celf2   | 1.726920764 | 8.76881608  | 5.44095E-05 | 480  | 2085  |
| Celsr2  | 11.6726729  | 2.867389844 | 3.16491E-26 | 0    | 463   |
| Centpm  | 6.533461152 | 2.083124078 | 0.00143701  | 0    | 13    |
| Cers5   | 14.14667781 | 6.984314278 | 5.32254E-44 | 0    | 2573  |
| Chd2    | 4.86748075  | 6.131117756 | 3.20291E-17 | 10   | 387   |
| Chl1    | 13.18493221 | 4.253925278 | 6.06753E-37 | 0    | 1321  |
| Chmp1a  | 13.30232824 | 7.493118362 | 8.4431E-38  | 0    | 1433  |
| Chmp2b  | 13.68475083 | 5.949808902 | 1.33969E-40 | 0    | 1868  |

|           |             |             |             |      |      |
|-----------|-------------|-------------|-------------|------|------|
| Chst10    | 10.08547751 | 3.974911751 | 4.32335E-16 | 0    | 154  |
| Chst11    | 11.34148055 | 4.04542608  | 5.52193E-24 | 0    | 368  |
| Cited2    | 7.16757829  | 5.962195396 | 6.40509E-30 | 6    | 1152 |
| Clcn3     | 7.731059524 | 6.384930632 | 1.61305E-06 | 0    | 30   |
| Clock     | 13.11214622 | 4.793155387 | 2.06132E-36 | 0    | 1256 |
| Clptm1l   | 12.36645767 | 5.848298795 | 4.56068E-31 | 0    | 749  |
| Cnn3      | 11.14442949 | 6.064238134 | 1.11551E-22 | 0    | 321  |
| Cnm3      | 12.59238321 | 5.268926682 | 1.15766E-32 | 0    | 876  |
| Cnot6l    | 13.87747874 | 7.602789868 | 5.13422E-42 | 0    | 2135 |
| Cntn1     | 9.90632954  | 1.356866819 | 4.7536E-15  | 0    | 136  |
| Coa4      | 11.81776222 | 4.03308628  | 3.15278E-27 | 0    | 512  |
| Cobl      | 11.87844169 | 3.051461768 | 1.21317E-27 | 0    | 534  |
| Cog3      | 11.12179083 | 3.759565546 | 1.65182E-22 | 0    | 316  |
| Coro1c    | 14.27635444 | 7.802664761 | 5.86045E-45 | 0    | 2815 |
| Cpeb2     | 13.36920714 | 4.435095177 | 2.76472E-38 | 0    | 1501 |
| Cpsf6     | 11.78066864 | 6.239317656 | 5.87571E-27 | 0    | 499  |
| Creb3l2   | 1.701325448 | 5.661305968 | 6.83784E-05 | 490  | 2091 |
| Crebrf    | 11.28961417 | 5.549943486 | 1.28287E-23 | 0    | 355  |
| Crtc1     | 12.58908616 | 4.100747212 | 1.1942E-32  | 0    | 874  |
| Csnk1d    | 13.7636415  | 7.517966579 | 3.56105E-41 | 0    | 1973 |
| Csnk2a1   | 11.84289488 | 5.830137297 | 2.20817E-27 | 0    | 521  |
| Ctdsp1    | 6.14318155  | 6.15390255  | 9.97775E-24 | 7    | 659  |
| Ctdspl    | 11.40660868 | 3.614144408 | 2.00068E-24 | 0    | 385  |
| Ctnnd1    | 13.95508496 | 5.662602949 | 1.37636E-42 | 0    | 2253 |
| Ctsb      | 0.98863262  | 9.618976049 | 0.01721179  | 3609 | 9396 |
| Cttn      | 8.842875745 | 5.044156079 | 7.59943E-11 | 0    | 65   |
| Cux1      | 12.37605466 | 7.00005907  | 3.95106E-31 | 0    | 754  |
| Cygb      | 1.23620058  | 7.133111645 | 0.003149561 | 1275 | 3941 |
| Cyld      | 12.23129053 | 7.062942433 | 4.19122E-30 | 0    | 682  |
| D17Wsu92e | 1.270605252 | 7.216015769 | 0.002468364 | 966  | 3058 |
| Daam1     | 11.75735853 | 2.94295918  | 8.51021E-27 | 0    | 491  |
| Dagla     | 11.74259611 | 5.180461169 | 1.05427E-26 | 0    | 486  |
| Dap       | 8.864854445 | 5.618689546 | 7.59943E-11 | 0    | 66   |
| Dazap2    | 3.469514577 | 8.895253196 | 3.65271E-14 | 256  | 3722 |
| Dchs1     | 12.83018518 | 3.922018765 | 2.27533E-34 | 0    | 1033 |
| Dcun1d3   | 9.761540091 | 2.240062787 | 2.85416E-14 | 0    | 123  |
| Dcx       | 7.778146178 | 1.069523187 | 1.08934E-06 | 0    | 31   |
| Ddah1     | 12.32939553 | 4.823042842 | 8.4711E-31  | 0    | 730  |
| Dgkg      | 11.53552503 | 3.489461009 | 2.77354E-25 | 0    | 421  |
| Dixdc1    | 8.864854445 | 3.986749434 | 7.59943E-11 | 0    | 66   |
| Dmxl1     | 9.262656685 | 4.203505671 | 1.25887E-11 | 0    | 87   |
| Dnajb9    | 11.53552503 | 4.785700399 | 2.77354E-25 | 0    | 421  |
| Dnmt3a    | 11.46892327 | 4.636557995 | 8.03917E-25 | 0    | 402  |
| Dpp8      | 8.14439843  | 6.605725329 | 5.79163E-08 | 0    | 40   |
| Dpy19l3   | 11.30577257 | 3.232473317 | 9.65553E-24 | 0    | 359  |
| Dyrk2     | 5.689054884 | 6.229237038 | 1.1883E-20  | 7    | 481  |
| Ednrb     | 12.51457662 | 3.62998025  | 4.13998E-32 | 0    | 830  |

|          |             |              |             |      |      |
|----------|-------------|--------------|-------------|------|------|
| Ehd1     | 13.25941636 | 7.239758055  | 1.74579E-37 | 0    | 1391 |
| Eif3j1   | 5.015453072 | 5.634452955  | 1.06817E-19 | 15   | 641  |
| Eif3j2   | 11.91576805 | 3.722192202  | 6.75923E-28 | 0    | 548  |
| Eif4e2   | 12.48295048 | 6.542804072  | 6.79243E-32 | 0    | 812  |
| Eif4ebp2 | 1.110714763 | 7.005041056  | 0.011575783 | 139  | 394  |
| Emc7     | 6.671047416 | 6.291953284  | 1.30134E-29 | 11   | 1485 |
| Eme2     | 11.53894664 | 3.296809495  | 2.60886E-25 | 0    | 422  |
| Eny2     | 11.91049448 | 5.153704014  | 7.4443E-28  | 0    | 546  |
| Ep300    | 1.307379429 | 6.123786088  | 0.002778046 | 161  | 523  |
| Epas1    | 14.05585198 | 5.801706612  | 2.49365E-43 | 0    | 2416 |
| Epdr1    | 11.67888952 | 2.872928302  | 2.99217E-26 | 0    | 465  |
| Ephb1    | 3.903996188 | 4.303697398  | 6.63467E-16 | 64   | 1259 |
| Erbp2ip  | 13.52398102 | 5.592673462  | 2.02158E-39 | 0    | 1671 |
| Erich5   | 12.80482817 | 4.546471462  | 3.3989E-34  | 0    | 1015 |
| Erp44    | 13.57820043 | 5.958750301  | 8.21658E-40 | 0    | 1735 |
| Etf1     | 14.12008247 | 5.914282523  | 8.36636E-44 | 0    | 2526 |
| Etl4     | 8.727660335 | 0.442569242  | 2.96087E-10 | 0    | 60   |
| Etv3     | 10.95251704 | 5.644780139  | 2.00104E-21 | 0    | 281  |
| Ezr      | 1.62758259  | 8.979785081  | 0.000120569 | 919  | 3726 |
| Fam110b  | 11.48320248 | 3.485439119  | 6.23276E-25 | 0    | 406  |
| Fam122a  | 11.09414702 | 5.237230619  | 2.46134E-22 | 0    | 310  |
| Fam160a2 | 12.93778428 | 5.291779131  | 3.79088E-35 | 0    | 1113 |
| Fam178a  | 2.026165546 | 5.276943249  | 8.84329E-06 | 83   | 444  |
| Fam53c   | 11.84289488 | 4.973892637  | 2.20817E-27 | 0    | 521  |
| Fbxw7    | 12.42310476 | 5.585715371  | 1.82063E-31 | 0    | 779  |
| Fcho2    | 12.45061547 | 5.128333436  | 1.16461E-31 | 0    | 794  |
| Fchs2    | 10.47658689 | 4.450716315  | 1.99391E-18 | 0    | 202  |
| Fdx1     | 12.88229638 | 4.095787052  | 9.37646E-35 | 0    | 1071 |
| Fgf14    | 12.5808104  | 3.691002746  | 1.39577E-32 | 0    | 869  |
| Flot1    | 0.965715634 | 7.806481517  | 0.020227878 | 1776 | 4551 |
| Fnta     | 4.098736128 | 5.907587186  | 1.27159E-13 | 14   | 317  |
| Foxn2    | 11.96238234 | 3.906646899  | 3.16363E-28 | 0    | 566  |
| Foxo4    | 12.20998449 | 5.003550329  | 5.98549E-30 | 0    | 672  |
| Foxp1    | 1.672309651 | 8.715216753  | 8.95032E-05 | 477  | 1995 |
| Foxp2    | 11.8036081  | 2.984340674  | 4.07877E-27 | 0    | 507  |
| Fut9     | 6.295281956 | -0.153292309 | 0.004174171 | 0    | 11   |
| Fxr1     | 1.653872269 | 5.491389413  | 0.000115726 | 363  | 1499 |
| Fytd1    | 11.88920527 | 4.865199391  | 1.04678E-27 | 0    | 538  |
| Gab2     | 8.521732932 | 4.140914705  | 2.27371E-09 | 0    | 52   |
| Galnt2   | 12.15083516 | 4.644603524  | 1.52377E-29 | 0    | 645  |
| Gatsl2   | 9.159737163 | 2.202122439  | 3.78455E-11 | 0    | 81   |
| Gdnf     | 10.74301706 | 2.062793036  | 4.29278E-20 | 0    | 243  |
| Git2     | 9.418837245 | 6.903279191  | 7.10076E-33 | 1    | 995  |
| Gmps     | 7.952481566 | 4.397088286  | 3.47842E-07 | 0    | 35   |
| Gna11    | 11.50085501 | 5.035535401  | 4.84467E-25 | 0    | 411  |
| Gnai3    | 12.67711761 | 5.223953566  | 2.80173E-33 | 0    | 929  |
| Gng12    | 14.05046798 | 6.984890527  | 2.73723E-43 | 0    | 2407 |

|         |             |              |             |     |      |
|---------|-------------|--------------|-------------|-----|------|
| Gng5    | 11.62838993 | 4.434172368  | 6.26929E-26 | 0   | 449  |
| Golph3l | 8.214544939 | 3.786326275  | 4.10802E-08 | 0   | 42   |
| Gphn    | 11.83734756 | 4.696454371  | 2.3227E-27  | 0   | 519  |
| Gpm6b   | 2.132021279 | 5.986504713  | 8.14387E-07 | 516 | 2968 |
| Gpr155  | 11.63159848 | 3.959050089  | 6.26929E-26 | 0   | 450  |
| Grb2    | 11.25258217 | 7.963590904  | 2.12609E-23 | 0   | 346  |
| Grhl2   | 11.4796459  | 3.812753858  | 6.64061E-25 | 0   | 405  |
| Gria1   | 5.752615128 | 4.444745864  | 6.48551E-26 | 21  | 1493 |
| Gxylt1  | 8.388277018 | 4.681660439  | 1.21318E-25 | 1   | 487  |
| Hdac7   | 1.896025087 | 7.514909447  | 9.99711E-06 | 534 | 2608 |
| Hes1    | 1.430523244 | 7.324362512  | 0.000707093 | 706 | 2497 |
| Hn1     | 11.55255252 | 6.228820411  | 2.17314E-25 | 0   | 426  |
| Hnrnpa1 | 10.88421522 | 5.90236687   | 5.84468E-21 | 0   | 268  |
| Hspa13  | 11.76029297 | 3.843613116  | 8.06884E-27 | 0   | 492  |
| Hspa2   | 11.14442949 | 3.910448683  | 1.11551E-22 | 0   | 321  |
| Igsf3   | 11.79790734 | 4.555119048  | 4.52468E-27 | 0   | 505  |
| Insig1  | 12.57748676 | 4.469976659  | 1.44017E-32 | 0   | 867  |
| Irf2bpl | 6.078325575 | 6.875642823  | 7.97032E-30 | 36  | 3201 |
| Itga3   | 13.616759   | 4.662699363  | 4.28662E-40 | 0   | 1782 |
| Itgb1   | 4.241538009 | 7.229850592  | 4.00305E-17 | 36  | 896  |
| Jade1   | 11.33362147 | 5.232078313  | 6.34243E-24 | 0   | 366  |
| Jade2   | 12.76447615 | 5.624343408  | 6.73279E-34 | 0   | 987  |
| Jam2    | 9.141846785 | 4.81849104   | 4.74447E-11 | 0   | 80   |
| Jmjd6   | 13.55303859 | 5.511704784  | 1.25249E-39 | 0   | 1705 |
| Kcmf1   | 11.54576562 | 6.383827868  | 2.30929E-25 | 0   | 424  |
| Kcnh5   | 11.92364244 | 3.09210176   | 5.85206E-28 | 0   | 551  |
| Kdelr1  | 14.63360296 | 8.160517015  | 1.30709E-47 | 0   | 3606 |
| Kdelr2  | 2.373747791 | 5.718780552  | 7.94762E-08 | 213 | 1449 |
| Kif2a   | 12.5058609  | 5.471482538  | 4.7198E-32  | 0   | 825  |
| Klf13   | 1.617179942 | 8.099925265  | 0.000152141 | 429 | 1727 |
| Klf7    | 3.887175197 | 7.185961266  | 2.55351E-16 | 109 | 2118 |
| Klhl2   | 1.68221674  | 5.310224922  | 0.000213809 | 84  | 354  |
| Klhl9   | 13.07137763 | 4.954446748  | 4.02242E-36 | 0   | 1221 |
| Kpna3   | 9.203469042 | 4.662580715  | 2.42676E-31 | 1   | 857  |
| Kpnb1   | 13.5715334  | 6.736246364  | 9.19771E-40 | 0   | 1727 |
| Kras    | 13.14057705 | 5.997696034  | 1.27661E-36 | 0   | 1281 |
| Ktn1    | 12.02716158 | 6.468552971  | 1.15501E-28 | 0   | 592  |
| Lcor    | 11.368655   | 5.904285456  | 3.66076E-24 | 0   | 375  |
| Ldb1    | 4.444584706 | 5.733848793  | 1.55616E-18 | 37  | 1060 |
| Ldlr    | 15.14747883 | 8.25831905   | 1.95327E-51 | 0   | 5149 |
| Lekr1   | 9.968550294 | 1.407654454  | 2.19182E-15 | 0   | 142  |
| Lhfp12  | 9.08680473  | 0.710164198  | 9.46504E-11 | 0   | 77   |
| Lnx2    | 5.653664318 | 4.79226097   | 0.040964585 | 0   | 7    |
| Lpp     | 12.54382231 | 5.118567783  | 2.54769E-32 | 0   | 847  |
| Lrch2   | 6.009851765 | -1.061396486 | 0.012730848 | 0   | 9    |
| Lrig1   | 3.929424803 | 0.131195511  | 1.25995E-05 | 2   | 42   |
| Lrrc58  | 6.95262524  | 4.976770368  | 3.65816E-27 | 5   | 830  |

|          |             |             |             |      |      |
|----------|-------------|-------------|-------------|------|------|
| Lrrk1    | 11.53552503 | 4.57274873  | 2.77354E-25 | 0    | 421  |
| Lsm11    | 12.88094888 | 4.163764523 | 9.61989E-35 | 0    | 1070 |
| Lsm14a   | 12.41381669 | 6.298823246 | 2.16664E-31 | 0    | 774  |
| Ltn1     | 12.85510421 | 5.593941681 | 1.49336E-34 | 0    | 1051 |
| Maf      | 4.320546923 | 3.894390992 | 4.55209E-16 | 20   | 527  |
| Mal2     | 13.51619033 | 6.728297246 | 2.31076E-39 | 0    | 1662 |
| Map2k1   | 1.579454116 | 6.629708021 | 0.000216634 | 409  | 1604 |
| Map2k3   | 7.464315052 | 6.977097897 | 2.73829E-36 | 13   | 3037 |
| Map3k3   | 7.219393581 | 6.001567533 | 4.77659E-05 | 0    | 21   |
| Map4k5   | 11.46173031 | 5.150470484 | 8.57079E-25 | 0    | 400  |
| Mapk1    | 12.16197328 | 6.167218971 | 1.29194E-29 | 0    | 650  |
| Mapk9    | 11.13088897 | 4.278951577 | 1.41073E-22 | 0    | 318  |
| Mapkapk2 | 6.113031666 | 8.082208402 | 6.18997E-29 | 25   | 2280 |
| Mapre1   | 1.53754859  | 8.48556611  | 0.00025655  | 2261 | 8612 |
| Mark2    | 12.97867315 | 6.644915586 | 1.916E-35   | 0    | 1145 |
| Mast4    | 13.66453098 | 5.648314625 | 1.8941E-40  | 0    | 1842 |
| Mdp1     | 10.02819816 | 6.189826562 | 1.03437E-15 | 0    | 148  |
| Med13    | 4.144332938 | 5.44858443  | 6.51087E-16 | 28   | 652  |
| Mef2a    | 0.969332188 | 5.937586739 | 0.021040319 | 608  | 1562 |
| Mef2c    | 11.74851922 | 8.182203607 | 9.46994E-27 | 0    | 488  |
| Meis2    | 9.626543741 | 1.255360712 | 1.64072E-13 | 0    | 112  |
| Mfap3    | 8.313756789 | 6.838133928 | 1.50714E-08 | 0    | 45   |
| Mfsd5    | 12.45967036 | 6.873615686 | 1.01664E-31 | 0    | 799  |
| Mfsd6    | 11.76029297 | 4.538684967 | 8.06884E-27 | 0    | 492  |
| Mgat2    | 10.77818621 | 5.910642619 | 2.6315E-20  | 0    | 249  |
| Mitf     | 11.67578456 | 2.870161878 | 2.99217E-26 | 0    | 464  |
| Mme      | 1.068715305 | 7.025786351 | 0.010452725 | 1263 | 3476 |
| Mon2     | 6.9969563   | 5.999970599 | 1.91268E-32 | 12   | 2029 |
| Morf4l2  | 1.974276897 | 4.134852966 | 7.19644E-06 | 184  | 949  |
| Mospd2   | 11.69738026 | 3.436800498 | 2.14225E-26 | 0    | 471  |
| Mpp1     | 9.784783276 | 5.773611227 | 2.41191E-14 | 0    | 125  |
| Mta1     | 12.31948199 | 6.270729068 | 9.82183E-31 | 0    | 725  |
| Mtch2    | 11.87031597 | 6.23198788  | 1.40724E-27 | 0    | 531  |
| Mtss1    | 5.842722641 | 5.96312264  | 0.022676824 | 0    | 8    |
| Myadm    | 8.315389218 | 6.667184415 | 3.82318E-25 | 1    | 463  |
| Mycbp2   | 0.928458324 | 7.247902826 | 0.02567832  | 1422 | 3551 |
| Myo1b    | 9.549055015 | 3.994514899 | 8.2306E-34  | 1    | 1089 |
| Nap1l1   | 13.07019571 | 7.976205397 | 4.11434E-36 | 0    | 1220 |
| Ndnl2    | 12.62816206 | 4.109078447 | 6.2676E-33  | 0    | 898  |
| Ndrg1    | 12.35096844 | 5.11161698  | 5.87425E-31 | 0    | 741  |
| Nedd4l   | 0.97875125  | 6.284512733 | 0.019670323 | 722  | 1867 |
| Nf1      | 12.69409719 | 4.277902733 | 2.1544E-33  | 0    | 940  |
| Nfat5    | 3.800404047 | 5.745338637 | 7.67804E-16 | 122  | 2232 |
| Nlgn2    | 13.03428037 | 4.262523492 | 7.45768E-36 | 0    | 1190 |
| Nnmt     | 12.34707001 | 3.476299909 | 6.31777E-31 | 0    | 739  |
| Npc2     | 1.657093611 | 8.962349112 | 8.63427E-05 | 2065 | 8545 |
| Nrp2     | 0.875376248 | 4.10861563  | 0.045324914 | 157  | 378  |

|         |             |             |             |     |      |
|---------|-------------|-------------|-------------|-----|------|
| Nt5dc3  | 12.76008502 | 5.016408863 | 7.11702E-34 | 0   | 984  |
| Ntng1   | 9.830175532 | 1.294995859 | 1.24369E-14 | 0   | 129  |
| Nuak1   | 11.54236016 | 2.891985302 | 2.45432E-25 | 0   | 423  |
| Nudt4   | 14.31428712 | 7.103936915 | 3.05339E-45 | 0   | 2890 |
| Obfc1   | 11.34929705 | 4.886529031 | 4.81125E-24 | 0   | 370  |
| Osbp18  | 11.22735532 | 6.170191633 | 3.30544E-23 | 0   | 340  |
| Pacs1   | 8.376299594 | 5.633468656 | 7.89453E-09 | 0   | 47   |
| Paip2   | 5.398511841 | 6.385082877 | 8.89011E-23 | 18  | 1002 |
| Pak1    | 11.7216716  | 6.902191097 | 1.45876E-26 | 0   | 479  |
| Pald    | 13.48637322 | 4.88783147  | 3.83974E-39 | 0   | 1628 |
| Pam     | 5.156854096 | 4.837069141 | 1.59866E-23 | 41  | 1924 |
| Pan3    | 11.65386067 | 5.544775445 | 4.19824E-26 | 0   | 457  |
| Pard3b  | 5.847433309 | 3.867976421 | 8.19745E-24 | 11  | 839  |
| Parm1   | 10.99299625 | 4.846992786 | 1.09307E-21 | 0   | 289  |
| Pcmt1   | 1.579830825 | 5.914858222 | 0.000269293 | 209 | 820  |
| Pcnx    | 2.851462416 | 4.186665988 | 3.83029E-09 | 45  | 427  |
| Pdcd4   | 11.94185059 | 4.069802426 | 4.39748E-28 | 0   | 558  |
| Pde7a   | 7.083169244 | 5.887912569 | 3.78706E-17 | 1   | 197  |
| Pdzd2   | 8.886503329 | 0.559533944 | 5.8403E-11  | 0   | 67   |
| Pdzd8   | 10.65745981 | 4.575222677 | 1.60555E-19 | 0   | 229  |
| Pex5    | 10.80685279 | 4.03154862  | 1.7911E-20  | 0   | 254  |
| Pfn1    | 13.41647745 | 5.698565414 | 1.24068E-38 | 0   | 1551 |
| Pfn2    | 10.79545442 | 2.100656499 | 2.1694E-20  | 0   | 252  |
| Pgap1   | 11.61223929 | 5.552943075 | 8.38195E-26 | 0   | 444  |
| Pgrmc2  | 13.82798984 | 6.940698854 | 1.19021E-41 | 0   | 2063 |
| Phactr4 | 11.61872126 | 5.938032459 | 7.45965E-26 | 0   | 446  |
| Phf13   | 10.80685279 | 4.535761693 | 1.7911E-20  | 0   | 254  |
| Phf20l1 | 11.09879126 | 5.381016816 | 2.27147E-22 | 0   | 311  |
| Phf21a  | 11.52865736 | 7.491721562 | 3.13616E-25 | 0   | 419  |
| Phf3    | 1.092620196 | 6.486104359 | 0.010006644 | 387 | 1083 |
| Phip    | 13.23957646 | 6.194267735 | 2.45515E-37 | 0   | 1372 |
| Phldb1  | 9.477599065 | 1.489495175 | 1.07555E-12 | 0   | 101  |
| Pi4k2a  | 2.063665056 | 5.190729717 | 3.82276E-06 | 129 | 708  |
| Pigx    | 9.048907631 | 5.131881042 | 1.5162E-10  | 0   | 75   |
| Pik3c2a | 1.863491201 | 4.757562432 | 2.5384E-05  | 139 | 664  |
| Pink1   | 1.27114319  | 6.22143774  | 0.002625859 | 545 | 1726 |
| Pkp4    | 11.67578456 | 5.373955087 | 2.99217E-26 | 0   | 464  |
| Plcx3   | 11.52521122 | 2.73643418  | 3.33564E-25 | 0   | 418  |
| Plekha1 | 11.24002389 | 5.301690743 | 2.64839E-23 | 0   | 343  |
| Plekha5 | 12.48117298 | 5.611137347 | 7.02284E-32 | 0   | 811  |
| Plekha7 | 11.28146659 | 2.894295433 | 1.37802E-23 | 0   | 353  |
| Polr3g  | 8.406582789 | 2.817044188 | 5.74928E-09 | 0   | 48   |
| Pou2f1  | 12.33334194 | 5.384179538 | 7.86965E-31 | 0   | 732  |
| Pou3f3  | 1.507131623 | 5.857440871 | 0.000359067 | 836 | 3118 |
| Ppfibp1 | 12.56579335 | 3.706594349 | 1.79508E-32 | 0   | 860  |
| Ppm1l   | 11.82898638 | 4.487756612 | 2.70483E-27 | 0   | 516  |
| Ppp1r11 | 13.86662698 | 7.363103638 | 6.17396E-42 | 0   | 2119 |

|          |             |             |             |      |      |
|----------|-------------|-------------|-------------|------|------|
| Ppp1r12c | 12.2832184  | 6.745092238 | 1.79091E-30 | 0    | 707  |
| Ppp1r14b | 12.65993581 | 6.394212891 | 3.76379E-33 | 0    | 918  |
| Ppp2ca   | 13.08431519 | 6.934255246 | 3.28524E-36 | 0    | 1232 |
| Ppp2r5c  | 8.506860418 | 6.171206367 | 4.78407E-32 | 2    | 1006 |
| Ppp3ca   | 1.269690389 | 7.625329808 | 0.002516714 | 831  | 2629 |
| Ppp4r2   | 11.16671838 | 6.20659957  | 8.18434E-23 | 0    | 326  |
| Prdm1    | 10.52570063 | 4.664396657 | 1.00809E-18 | 0    | 209  |
| Prkacb   | 12.82738965 | 6.401437227 | 2.33656E-34 | 0    | 1031 |
| Prkce    | 12.32147015 | 5.955931686 | 9.82183E-31 | 0    | 726  |
| Prkci    | 11.93407522 | 4.044496849 | 5.07083E-28 | 0    | 555  |
| Prkd1    | 11.28146659 | 2.521765583 | 1.37802E-23 | 0    | 353  |
| Prosc    | 11.68507947 | 4.255665334 | 2.67546E-26 | 0    | 467  |
| Prpf19   | 11.56603128 | 6.675089642 | 1.70673E-25 | 0    | 430  |
| Prr13    | 13.57820043 | 8.508362525 | 8.21658E-40 | 0    | 1735 |
| Ptdss1   | 12.71995149 | 6.654472553 | 1.39889E-33 | 0    | 957  |
| Ptpn4    | 11.05644483 | 3.288101773 | 4.34912E-22 | 0    | 302  |
| Ptpn9    | 10.77818621 | 2.888061448 | 2.6315E-20  | 0    | 249  |
| Ptrf     | 1.783414102 | 7.285985663 | 2.66443E-05 | 1130 | 5104 |
| Qser1    | 7.778146178 | 2.125741179 | 1.08934E-06 | 0    | 31   |
| Rab10    | 1.507574774 | 8.015809926 | 0.000386063 | 539  | 2011 |
| Rab21    | 11.8675972  | 5.783275188 | 1.47889E-27 | 0    | 530  |
| Rab23    | 5.17322348  | 1.487902699 | 4.34345E-13 | 3    | 147  |
| Rab27a   | 11.8757382  | 4.744692161 | 1.27456E-27 | 0    | 533  |
| Rab34    | 11.37632604 | 2.605040728 | 3.19677E-24 | 0    | 377  |
| Rab35    | 11.70957706 | 5.262244456 | 1.81566E-26 | 0    | 475  |
| Rabgap1  | 8.136536214 | 6.168001241 | 6.14733E-24 | 1    | 409  |
| Rac1     | 11.40109231 | 8.546555054 | 2.29482E-53 | 2    | 7480 |
| Rala     | 1.35335157  | 7.092141099 | 0.001406783 | 516  | 1730 |
| Ralgapb  | 10.59308387 | 3.932183529 | 3.74804E-19 | 0    | 219  |
| Ralgps2  | 5.653664318 | 7.353756988 | 0.040964585 | 0    | 7    |
| Rap2b    | 9.460278705 | 5.121078685 | 3.51351E-33 | 1    | 1024 |
| Rapgef4  | 9.105386392 | 3.743636107 | 7.50284E-11 | 0    | 78   |
| Rapgef5  | 11.96492838 | 5.823806711 | 3.01931E-28 | 0    | 567  |
| Rarg     | 6.62851447  | 6.986555798 | 3.4279E-32  | 21   | 2740 |
| Rasa1    | 12.30347726 | 5.385767797 | 1.27514E-30 | 0    | 717  |
| Rassf8   | 10.67622547 | 2.31896099  | 1.17683E-19 | 0    | 232  |
| Rbfox1   | 8.50486055  | 3.03984525  | 1.9021E-26  | 1    | 528  |
| Rbm25    | 1.657474632 | 8.547248383 | 8.91981E-05 | 1178 | 4876 |
| Rbmx     | 6.998613759 | 4.546033125 | 0.000193974 | 0    | 18   |
| Rcc2     | 8.629840735 | 7.138037635 | 2.54243E-38 | 4    | 2135 |
| Rcor1    | 12.07036345 | 5.947225854 | 5.68925E-29 | 0    | 610  |
| Rell1    | 13.6551023  | 5.713955717 | 2.23911E-40 | 0    | 1830 |
| Rhob     | 14.59672973 | 7.397227733 | 2.46693E-47 | 0    | 3515 |
| Rictor   | 0.945562731 | 5.670290511 | 0.024180672 | 702  | 1774 |
| Rnf130   | 9.784783276 | 4.321871218 | 2.41191E-14 | 0    | 125  |
| Rnf145   | 12.53528201 | 6.328125631 | 2.89717E-32 | 0    | 842  |
| Rnf44    | 13.62402642 | 6.622205284 | 3.7829E-40  | 0    | 1791 |



|          |             |              |             |      |      |
|----------|-------------|--------------|-------------|------|------|
| Rpia     | 11.56938139 | 6.28435024   | 1.60728E-25 | 0    | 431  |
| Rprd1b   | 11.7336656  | 4.053053954  | 1.23948E-26 | 0    | 483  |
| Rreb1    | 12.63776788 | 5.918975903  | 5.38879E-33 | 0    | 904  |
| Rsf1     | 12.96601942 | 5.217830377  | 2.32404E-35 | 0    | 1135 |
| Rtn4     | 2.429775691 | 8.077876388  | 2.51642E-08 | 597  | 4221 |
| Rufy1    | 7.219393581 | 5.905687107  | 4.77659E-05 | 0    | 21   |
| Runx1t1  | 11.71261021 | 2.902995198  | 1.71867E-26 | 0    | 476  |
| Rwdd4a   | 13.21732597 | 5.599388025  | 3.54086E-37 | 0    | 1351 |
| Ryk      | 3.855259448 | 5.601670651  | 2.00621E-16 | 166  | 3154 |
| Safb     | 12.52324001 | 5.839392808  | 3.51769E-32 | 0    | 835  |
| Sar1a    | 12.82598985 | 6.476902366  | 2.39951E-34 | 0    | 1030 |
| Sav1     | 12.54722432 | 4.531029213  | 2.38968E-32 | 0    | 849  |
| Sbds     | 13.33517152 | 6.129651953  | 4.84707E-38 | 0    | 1466 |
| Sc5d     | 13.1461966  | 4.885534043  | 1.17124E-36 | 0    | 1286 |
| Scaf11   | 12.29944818 | 5.730833112  | 1.37457E-30 | 0    | 715  |
| Scyl2    | 12.49003867 | 5.56667275   | 6.1472E-32  | 0    | 816  |
| Sec14l1  | 14.19302207 | 6.645736375  | 2.4264E-44  | 0    | 2657 |
| Sec62    | 1.073462956 | 8.431577189  | 0.009967789 | 1851 | 5111 |
| Sema3a   | 12.07979068 | 3.233054649  | 4.78096E-29 | 0    | 614  |
| Sgk3     | 5.842722641 | 5.97401295   | 0.022676824 | 0    | 8    |
| Sh3bp4   | 10.82378325 | 2.362361301  | 1.34732E-20 | 0    | 257  |
| Sh3kbp1  | 7.529822351 | 6.781034923  | 3.41543E-25 | 2    | 511  |
| Sh3pxd2b | 10.81816181 | 3.794372944  | 1.48092E-20 | 0    | 256  |
| Shc1     | 7.867945609 | 4.031247474  | 7.40189E-07 | 0    | 33   |
| Sik1     | 9.477599065 | 3.366052662  | 1.07555E-12 | 0    | 101  |
| Skil     | 11.94443309 | 5.252126069  | 4.19428E-28 | 0    | 559  |
| Slc10a3  | 5.653664318 | 4.761338071  | 0.040964585 | 0    | 7    |
| Slc12a6  | 10.41833    | 3.481362038  | 4.52701E-18 | 0    | 194  |
| Slc1a1   | 12.22280583 | 3.36290364   | 4.71717E-30 | 0    | 678  |
| Slc23a2  | 12.87148094 | 4.361690374  | 1.12253E-34 | 0    | 1063 |
| Slc25a20 | 10.46943214 | 4.460216648  | 2.23805E-18 | 0    | 201  |
| Slc25a51 | 12.72446631 | 5.897342247  | 1.28429E-33 | 0    | 960  |
| Slc2a13  | 6.098207328 | 2.873277169  | 2.63007E-21 | 5    | 459  |
| Slc30a9  | 9.547212579 | 1.626555983  | 4.12739E-13 | 0    | 106  |
| Slc33a1  | 2.319751388 | 5.14248454   | 1.91127E-07 | 148  | 970  |
| Slc35a1  | 12.59402892 | 4.193132538  | 1.12227E-32 | 0    | 877  |
| Slc39a1  | 13.68552288 | 5.298675694  | 1.33969E-40 | 0    | 1869 |
| Slc39a10 | 11.12179083 | 3.095938914  | 1.65182E-22 | 0    | 316  |
| Slc39a13 | 12.59402892 | 4.369220745  | 1.12227E-32 | 0    | 877  |
| Slc39a9  | 12.47939328 | 4.9792465    | 7.26139E-32 | 0    | 810  |
| Slc43a2  | 11.36094296 | 5.977568132  | 4.1952E-24  | 0    | 373  |
| Slc5a3   | 9.229159389 | 3.045212626  | 1.94396E-11 | 0    | 85   |
| Slco3a1  | 1.404538534 | 4.905567905  | 0.001150898 | 234  | 813  |
| Slmo2    | 12.34120254 | 5.061620792  | 7.04944E-31 | 0    | 736  |
| Smad1    | 10.70087258 | 2.455085489  | 8.65875E-20 | 0    | 236  |
| Smad7    | 6.639263481 | -0.811006747 | 0.00085757  | 0    | 14   |
| Smc6     | 13.24691768 | 6.461961837  | 2.13234E-37 | 0    | 1379 |

|          |             |             |             |      |       |
|----------|-------------|-------------|-------------|------|-------|
| Smco4    | 13.59801864 | 5.518635234 | 5.87541E-40 | 0    | 1759  |
| Smim14   | 1.1539106   | 8.046161112 | 0.006790843 | 325  | 949   |
| Smpd3    | 13.03912105 | 4.14757598  | 6.958E-36   | 0    | 1194  |
| Snap23   | 12.82178227 | 5.613391    | 2.59916E-34 | 0    | 1027  |
| Snf8     | 12.14411078 | 5.979341091 | 1.72579E-29 | 0    | 642   |
| Snx1     | 8.414687743 | 5.489117758 | 7.94113E-26 | 1    | 496   |
| Snx16    | 11.37632604 | 3.802947791 | 3.19677E-24 | 0    | 377   |
| Snx18    | 11.56938139 | 4.792088208 | 1.60728E-25 | 0    | 431   |
| Snx29    | 12.8426985  | 4.136642654 | 1.8417E-34  | 0    | 1042  |
| Socs7    | 12.20783648 | 5.374363317 | 6.2292E-30  | 0    | 671   |
| Sort1    | 13.60293095 | 6.846672824 | 5.34293E-40 | 0    | 1765  |
| Sowahc   | 4.692474703 | 4.594478648 | 2.15287E-14 | 7    | 241   |
| Spats2l  | 11.78931374 | 2.971542581 | 5.02151E-27 | 0    | 502   |
| Spcs2    | 12.07508476 | 6.45703588  | 5.21458E-29 | 0    | 612   |
| Spn      | 12.66933306 | 6.589495331 | 3.24591E-33 | 0    | 924   |
| Spin1    | 12.82458868 | 4.8535959   | 2.46422E-34 | 0    | 1029  |
| Spopl    | 11.73664858 | 4.222472315 | 1.17425E-26 | 0    | 484   |
| Sppl2a   | 1.058228378 | 6.232815798 | 0.012059099 | 512  | 1399  |
| Spry4    | 9.90632954  | 1.356866819 | 4.7536E-15  | 0    | 136   |
| Spsb1    | 10.9161414  | 3.22686239  | 3.40027E-21 | 0    | 274   |
| Srpk1    | 12.94553974 | 5.432887538 | 3.27004E-35 | 0    | 1119  |
| Srsf2    | 2.763746913 | 7.252422507 | 6.07814E-09 | 54   | 482   |
| St7      | 9.574143917 | 2.797314798 | 3.42262E-13 | 0    | 108   |
| Stag1    | 11.78643779 | 5.271915525 | 5.29089E-27 | 0    | 501   |
| Stk35    | 11.46533127 | 6.136275495 | 8.03917E-25 | 0    | 401   |
| Strbp    | 12.17082227 | 8.089517281 | 1.09657E-29 | 0    | 654   |
| Stx5a    | 8.628367727 | 5.068170307 | 6.94986E-10 | 0    | 56    |
| Surf2    | 12.42680331 | 3.933842806 | 1.75862E-31 | 0    | 781   |
| Syncrip  | 1.322266689 | 7.26663281  | 0.001651844 | 950  | 3117  |
| Sypl     | 7.469382554 | 6.296544593 | 1.26863E-05 | 0    | 25    |
| Taok1    | 11.6347999  | 6.334419154 | 5.91791E-26 | 0    | 451   |
| Tbc1d22b | 11.45812034 | 4.334074893 | 9.13906E-25 | 0    | 399   |
| Tbc1d24  | 11.70349155 | 3.19106636  | 2.02709E-26 | 0    | 473   |
| Tbl1x    | 3.792550246 | 5.097311046 | 1.39486E-15 | 95   | 1729  |
| Tceanc2  | 12.89436762 | 6.496455257 | 7.64539E-35 | 0    | 1080  |
| Tcf12    | 8.12168864  | 6.033958982 | 7.86484E-37 | 6    | 2232  |
| Tead1    | 12.69409719 | 3.795705157 | 2.1544E-33  | 0    | 940   |
| Tex2     | 12.70632166 | 4.273202509 | 1.75956E-33 | 0    | 948   |
| Tfdp2    | 11.20167948 | 3.653590933 | 4.80355E-23 | 0    | 334   |
| Tgfb1    | 3.399725644 | 9.20156158  | 4.92112E-14 | 938  | 12990 |
| Tgfb1    | 13.29019739 | 6.099834531 | 1.04554E-37 | 0    | 1421  |
| Tiam1    | 8.406582789 | 4.308699767 | 5.74928E-09 | 0    | 48    |
| Tle4     | 14.14891877 | 6.406576085 | 5.09501E-44 | 0    | 2577  |
| Tm9sf4   | 8.267890554 | 4.898988171 | 7.99638E-25 | 1    | 448   |
| Tmbim6   | 0.953167402 | 8.648322304 | 0.021966798 | 1575 | 4001  |
| Tmed7    | 11.00294104 | 4.871798646 | 1.0038E-21  | 0    | 291   |
| Tmem115  | 11.1755384  | 2.602527831 | 7.02034E-23 | 0    | 328   |

|           |             |              |             |       |       |
|-----------|-------------|--------------|-------------|-------|-------|
| Tmem127   | 6.533461152 | 6.153785675  | 0.00143701  | 0     | 13    |
| Tmem50b   | 12.74683084 | 5.848353662  | 8.89709E-34 | 0     | 975   |
| Tmem57    | 13.11902089 | 5.739201958  | 1.84715E-36 | 0     | 1262  |
| Tmpo      | 4.021499275 | 6.980801372  | 1.54444E-16 | 58    | 1238  |
| Tmsb4x    | 1.718613323 | 13.32353642  | 4.59611E-05 | 21377 | 92309 |
| Tmx1      | 11.60898736 | 6.819072421  | 8.88684E-26 | 0     | 443   |
| Tnfaip8   | 13.9570046  | 8.416162281  | 1.34253E-42 | 0     | 2256  |
| Tnk2      | 11.3839565  | 5.858732494  | 2.98814E-24 | 0     | 379   |
| Tnpo1     | 13.90889171 | 6.983200937  | 3.01487E-42 | 0     | 2182  |
| Tnrc6b    | 2.132673732 | 7.06552533   | 1.62294E-06 | 144   | 829   |
| Tns1      | 11.20167948 | 4.374320605  | 4.80355E-23 | 0     | 334   |
| Tox4      | 12.01000517 | 5.941368634  | 1.51423E-28 | 0     | 585   |
| Tpd52     | 12.25228649 | 7.886730309  | 2.94955E-30 | 0     | 692   |
| Trabd2b   | 13.02454999 | 4.103409283  | 8.77425E-36 | 0     | 1182  |
| Traf4     | 11.00294104 | 4.120958822  | 1.0038E-21  | 0     | 291   |
| Tram1     | 1.042902503 | 7.450669638  | 0.012484359 | 1153  | 3117  |
| Trim2     | 12.4193967  | 6.130441811  | 1.95158E-31 | 0     | 777   |
| Trio      | 11.7336656  | 3.938875006  | 1.23948E-26 | 0     | 483   |
| Trp53inp1 | 10.36535108 | 5.870034988  | 9.34593E-18 | 0     | 187   |
| Trpm3     | 6.533461152 | -0.857454566 | 0.00143701  | 0     | 13    |
| Tsc1      | 11.77777539 | 4.961532801  | 6.19295E-27 | 0     | 498   |
| Tsnax     | 10.53943141 | 6.711028119  | 8.06364E-19 | 0     | 211   |
| Ttc14     | 11.37249562 | 4.134860528  | 3.42059E-24 | 0     | 376   |
| Ttc19     | 7.525652942 | 2.477223187  | 8.28134E-06 | 0     | 26    |
| Ttyh3     | 1.996784918 | 7.123496373  | 4.72007E-06 | 252   | 1320  |
| Ube2f     | 10.87341421 | 6.23995073   | 6.40425E-21 | 0     | 266   |
| Ube2g1    | 2.967484452 | 5.108043364  | 9.12542E-09 | 23    | 237   |
| Ube2h     | 14.0275114  | 6.694883721  | 4.03544E-43 | 0     | 2369  |
| Ube2k     | 7.514300283 | 6.478187806  | 2.04061E-32 | 6     | 1465  |
| Ube2l3    | 13.69552219 | 6.894913727  | 1.12036E-40 | 0     | 1882  |
| Ube2r2    | 10.69970503 | 8.46437149   | 3.91321E-48 | 2     | 4600  |
| Uchl3     | 13.32826697 | 5.494044101  | 5.53566E-38 | 0     | 1459  |
| Uck2      | 13.06189508 | 5.567819856  | 4.71374E-36 | 0     | 1213  |
| Usp2      | 8.928850233 | 2.072739783  | 3.47788E-11 | 0     | 69    |
| Usp24     | 12.93259072 | 5.681345825  | 4.08297E-35 | 0     | 1109  |
| Usp36     | 14.21350803 | 6.269136517  | 1.69689E-44 | 0     | 2695  |
| Usp47     | 12.73792659 | 6.148040192  | 1.02396E-33 | 0     | 969   |
| Usp5      | 8.751451286 | 5.341823406  | 2.24222E-10 | 0     | 61    |
| Vamp3     | 11.52865736 | 6.058041086  | 3.13616E-25 | 0     | 419   |
| Vps26a    | 11.35707143 | 5.102036338  | 4.49225E-24 | 0     | 372   |
| Vps26b    | 11.1489149  | 5.10356757   | 1.03204E-22 | 0     | 322   |
| Vps36     | 11.1034206  | 4.710255909  | 2.09679E-22 | 0     | 312   |
| Wasl      | 12.452431   | 3.970602541  | 1.12563E-31 | 0     | 795   |
| Wdr82     | 12.721458   | 6.673011239  | 1.35955E-33 | 0     | 958   |
| Whamm     | 10.95763949 | 3.736462291  | 1.83379E-21 | 0     | 282   |
| Whsc1     | 7.410828025 | 4.520696277  | 1.95811E-05 | 0     | 24    |
| Wipi2     | 11.62838993 | 5.212861315  | 6.26929E-26 | 0     | 449   |

|         |             |              |             |     |      |
|---------|-------------|--------------|-------------|-----|------|
| Wisp1   | 11.42521755 | 5.267367076  | 1.53661E-24 | 0   | 390  |
| Wnt2    | 5.842722641 | -1.117656276 | 0.022676824 | 0   | 8    |
| Wnt4    | 13.46224795 | 4.582075431  | 5.80797E-39 | 0   | 1601 |
| Xiap    | 11.84566056 | 5.354172979  | 2.09951E-27 | 0   | 522  |
| Yaf2    | 11.81494249 | 4.935102046  | 3.3187E-27  | 0   | 511  |
| Yod1    | 11.76322146 | 3.485884574  | 7.65122E-27 | 0   | 493  |
| Ywhae   | 4.828908664 | 8.871541142  | 3.91442E-23 | 211 | 7872 |
| Zadh2   | 12.20783648 | 3.984666573  | 6.2292E-30  | 0   | 671  |
| Zbtb41  | 11.34929705 | 3.71373828   | 4.81125E-24 | 0   | 370  |
| Zbtb44  | 11.99513551 | 3.664831897  | 1.90187E-28 | 0   | 579  |
| Zc3h15  | 12.5197809  | 6.042025875  | 3.75404E-32 | 0   | 833  |
| Zcchc14 | 11.55930764 | 4.999641543  | 1.9253E-25  | 0   | 428  |
| Zdhhc17 | 10.32628131 | 3.141191878  | 1.73828E-17 | 0   | 182  |
| Zdhhc20 | 6.120315383 | 5.329102882  | 9.53559E-12 | 1   | 101  |
| Zdhhc6  | 10.73707128 | 4.644778811  | 4.73969E-20 | 0   | 242  |
| Zeb1    | 13.41368449 | 5.676165361  | 1.30929E-38 | 0   | 1548 |
| Zeb2    | 11.97759164 | 5.925662123  | 2.5071E-28  | 0   | 572  |
| Zfand5  | 14.04265545 | 6.901246808  | 3.11325E-43 | 0   | 2394 |
| Zfp202  | 11.69431488 | 4.21433247   | 2.26424E-26 | 0   | 470  |
| Zfp207  | 3.33452987  | 7.778078096  | 7.52292E-13 | 105 | 1391 |
| Zfp292  | 7.778146178 | 5.405020324  | 1.08934E-06 | 0   | 31   |
| Zfp36   | 2.550586279 | 8.047416075  | 5.67321E-09 | 612 | 4705 |
| Zfp36l1 | 2.170061183 | 8.11548788   | 4.96814E-07 | 687 | 4057 |
| Zfp609  | 11.12634707 | 3.450125098  | 1.52633E-22 | 0   | 317  |
| Zfp704  | 13.77020703 | 5.195081408  | 3.17994E-41 | 0   | 1982 |
| Zfp827  | 6.522412521 | 5.848972     | 1.85236E-28 | 10  | 1219 |
| Zmym2   | 10.84051733 | 4.735220576  | 1.11639E-20 | 0   | 260  |
| Znrf1   | 7.956500722 | 4.580507058  | 9.84312E-23 | 1   | 361  |
| Zzef1   | 1.859199722 | 5.821636369  | 1.85144E-05 | 260 | 1238 |

**Table S27. Immune-related KEGG pathways enriched in target genes of CRMCs of KO and MS-CKO mice.**

| Category | Term code | Term                                      | Count | %        | PValue   | Genes                                                                                                                                                        | List Total | Pop Hits | Pop Total | Fold Enrichment | Bonferroni  | Benjamini | FDR      |
|----------|-----------|-------------------------------------------|-------|----------|----------|--------------------------------------------------------------------------------------------------------------------------------------------------------------|------------|----------|-----------|-----------------|-------------|-----------|----------|
| KEGG_PAT | mmu05100  | Bacterial invasion of epithelial cells    | 11    | 1.627219 | 2.98E-04 | ITGB1, ACTR2, CTTN, SHC1, CAV1, ARPC1B, RAC1, WASL, CRK, WASF2, CD2AP                                                                                        | 328        | 76       | 9330      | 4.117057        | 0.076422647 | 0.0036131 | 0.00272  |
| KEGG_PAT | mmu04666  | Fc gamma R-mediated phagocytosis          | 12    | 1.775148 | 3.87E-04 | ACTR2, MAP2K1, MARCKS, PAK1, PRKCE, ARPC1B, MAPK1, ASAP1, GAB2, RAC1, CRK, WASF2                                                                             | 328        | 93       | 9330      | 3.670338        | 0.098215328 | 0.0043826 | 0.003299 |
| KEGG_PAT | mmu05220  | Chronic myeloid leukemia                  | 10    | 1.47929  | 0.001287 | MAP2K1, SHC1, ABL1, MAPK1, GRB2, BRAF, KRAS, GAB2, CRK, TGFBR1                                                                                               | 328        | 76       | 9330      | 3.742779        | 0.291021406 | 0.0101091 | 0.00761  |
| KEGG_PAT | mmu04664  | Fc epsilon RI signaling pathway           | 9     | 1.331361 | 0.002041 | MAP2K3, MAPK9, MAP2K1, MAPK1, GRB2, FYN, KRAS, GAB2, RAC1                                                                                                    | 328        | 66       | 9330      | 3.87888         | 0.420482794 | 0.0147298 | 0.011089 |
| KEGG_PAT | mmu05135  | Yersinia infection                        | 13    | 1.923077 | 0.002728 | ITGB1, MAP2K3, ACTR2, GIT2, MAP2K1, ARHGEF12, ARPC1B, WASL, MAPK9, MAPK1, RAC1, CRK, WASF2                                                                   | 328        | 135      | 9330      | 2.73916         | 0.517785579 | 0.0186762 | 0.01406  |
| KEGG_PAT | mmu04062  | Chemokine signaling pathway               | 16    | 2.366864 | 0.003045 | MAP2K1, SHC1, GNAI3, BRAF, GNG12, PRKCZ, ADCY6, TIAM1, PAK1, GNG5, MAPK1, GRB2, KRAS, RAC1, CRK, PRKACB                                                      | 328        | 192      | 9330      | 2.370427        | 0.557063383 | 0.0193592 | 0.014574 |
| KEGG_PAT | mmu05166  | Human T-cell leukemia virus 1 infection   | 18    | 2.662722 | 0.006333 | ATF2, MAP3K3, EGR1, MAP2K1, CRTCL1, XIAP, TGFBR1, ADCY6, PPP3CA, MAPK9, ZFP36, CCND2, CREB3L1, CREB3L2, MAPK1, EP300, KRAS, PRKACB                           | 328        | 248      | 9330      | 2.064565        | 0.816640616 | 0.0338186 | 0.025459 |
| KEGG_PAT | mmu05132  | Salmonella infection                      | 18    | 2.662722 | 0.007681 | MAP2K3, ACTR2, RALA, MAP2K1, ARPC1B, WASL, PIK3C2A, RHOB, MAPK9, SNX18, PAK1, BCL2, EXOC4, MAPK1, RAC1, PFN1, KPNA3, PFN2                                    | 328        | 253      | 9330      | 2.023764        | 0.872386293 | 0.0391141 | 0.029445 |
| KEGG_PAT | mmu05163  | Human cytomegalovirus infection           | 18    | 2.662722 | 0.007979 | ATF2, MAP2K1, ARHGEF12, GNAI3, TSC1, GNG12, ADCY6, PPP3CA, GNG5, GNA11, CREB3L1, CREB3L2, MAPK1, GRB2, KRAS, RAC1, CRK, PRKACB                               | 328        | 254      | 9330      | 2.015796        | 0.882211304 | 0.0394503 | 0.029699 |
| KEGG_PAT | mmu04660  | T cell receptor signaling pathway         | 11    | 1.627219 | 0.010453 | PPP2CA, MAPK9, PPP2CB, PPP3CA, MAP2K1, PAK1, MAPK1, GRB2, FYN, KRAS, PPP2R5C                                                                                 | 328        | 122      | 9330      | 2.564724        | 0.939528797 | 0.048119  | 0.036224 |
| KEGG_PAT | mmu05165  | Human papillomavirus infection            | 22    | 3.254438 | 0.015215 | MAGI1, ITGB1, PRKCI, MAP2K1, ITGA3, TSC1, PPP2R5C, LAMC1, PRKCZ, PPP2CA, PPP2CB, CCND2, CREB3L1, CREB3L2, MAPK1, EP300, GRB2, HES1, KRAS, WNT2, PRKACB, WNT4 | 328        | 360      | 9330      | 1.738313        | 0.983320047 | 0.0644814 | 0.048542 |
| KEGG_PAT | mmu04650  | Natural killer cell mediated cytotoxicity | 10    | 1.47929  | 0.020466 | PPP3CA, MAP2K1, PAK1, SHC1, MAPK1, GRB2, FYN, BRAF, KRAS, RAC1                                                                                               | 328        | 116      | 9330      | 2.452166        | 0.995998949 | 0.0815598 | 0.061399 |
| KEGG_PAT | mmu05145  | Toxoplasmosis                             | 9     | 1.331361 | 0.037313 | ITGB1, MAP2K3, MAPK9, GNAI3, BCL2, XIAP, MAPK1, LAMC1, LDLR                                                                                                  | 328        | 109      | 9330      | 2.34868         | 0.999961053 | 0.1328357 | 0.1      |
| KEGG_PAT | mmu04350  | TGF-beta signaling pathway                | 9     | 1.331361 | 0.039069 | ACVR1, PPP2CA, SMAD1, PPP2CB, EP300, MAPK1, SKIL, TGFBR1, SMAD7                                                                                              | 328        | 110      | 9330      | 2.327328        | 0.999976074 | 0.1368526 | 0.103024 |
| KEGG_PAT | mmu05170  | Human immunodeficiency virus 1 infection  | 15    | 2.218935 | 0.040389 | MAP2K3, MAP2K1, FBXW11, GNAI3, GNG12, PPP3CA, MAPK9, PAK1, GNG5, GNA11, BCL2, MAPK1, KRAS, RAC1, CRK                                                         | 328        | 238      | 9330      | 1.79276         | 0.999983426 | 0.1368526 | 0.103024 |

|                    |                       |   |          |          |                                                                     |     |     |      |         |             |           |          |
|--------------------|-----------------------|---|----------|----------|---------------------------------------------------------------------|-----|-----|------|---------|-------------|-----------|----------|
| KEGG_PATH mmu04668 | TNF signaling pathway | 9 | 1.331361 | 0.048672 | MAP2K3, CYLD, MAPK9, ATF2, MAP2K1,<br>CREB3L1, CREB3L2, XIAP, MAPK1 | 328 | 115 | 9330 | 2.22614 | 0.999998362 | 0.1584792 | 0.119305 |
|--------------------|-----------------------|---|----------|----------|---------------------------------------------------------------------|-----|-----|------|---------|-------------|-----------|----------|

---

**Table S28. Neuronal function related KEGG pathways enriched in the predicted targets of upregulated genes of CRMCS of MS-CKO and KO mice**

| Category | Term code | Term                             | Count | %        | PValue   | Genes                                                                                                                                           | List Total | Pop Hits | Pop Total | Fold Enrichment | Bonferroni | Benjamini | FDR      |
|----------|-----------|----------------------------------|-------|----------|----------|-------------------------------------------------------------------------------------------------------------------------------------------------|------------|----------|-----------|-----------------|------------|-----------|----------|
| KEGG_PAT | mmu04722  | Neurotrophin signaling pathway   | 16    | 2.366864 | 2.00E-05 | YWHAE, MAP3K3, MAP2K1, SHC1, SORT1, BRAF, MAPK9, ARHGDI1, MAPKAPK2, BCL2, ABL1, MAPK1, GRB2, KRAS, RAC1, CRK                                    | 328        | 121      | 9330      | 3.761338        | 0.0053197  | 0.00127   | 9.56E-04 |
| KEGG_PAT | mmu04360  | Axon guidance                    | 19    | 2.810651 | 6.26E-05 | NTNG1, ITGB1, ARHGEF12, RYK, SEMA3A, GNAI3, L1CAM, PRKCZ, PPP3CA, ABLIM1, PAK1, RASA1, ABL1, MAPK1, KRAS, FYN, RAC1, EPHB1, WNT4                | 328        | 181      | 9330      | 2.985952        | 0.0165846  | 0.0020904 | 0.001574 |
| KEGG_PAT | mmu04725  | Cholinergic synapse              | 14    | 2.071006 | 1.41E-04 | MAP2K1, GNAI3, CACNA1B, GNG12, ADCY6, GNG5, GNA11, CREB3L1, CREB3L2, BCL2, MAPK1, KRAS, FYN, PRKACB                                             | 328        | 112      | 9330      | 3.55564         | 0.0369912  | 0.0028494 | 0.002145 |
| KEGG_PAT | mmu04810  | Regulation of actin cytoskeleton | 21    | 3.106509 | 1.72E-04 | ITGB1, ACTR2, MAP2K1, ARHGEF12, ITGA3, ARPC1B, BRAF, WASL, GNG12, TIAM1, PAK1, TMSB4X, MAPK1, KRAS, RAC1, EZR, PFN1, CRK, PPP1R12C, WASF2, PFN2 | 328        | 231      | 9330      | 2.58592         | 0.0449924  | 0.0028494 | 0.002145 |
| KEGG_PAT | mmu04728  | Dopaminergic synapse             | 15    | 2.218935 | 2.64E-04 | GRIA1, ATF2, GNAI3, CACNA1B, PPP2R5C, GNG12, PPP2CA, PPP2CB, PPP3CA, MAPK9, GNG5, CREB3L1, CREB3L2, CLOCK, PRKACB                               | 328        | 135      | 9330      | 3.160569        | 0.0680108  | 0.0033536 | 0.002525 |
| KEGG_PAT | mmu04730  | Long-term depression             | 9     | 1.331361 | 0.00109  | PPP2CA, GRIA1, PPP2CB, MAP2K1, GNA11, GNAI3, MAPK1, BRAF, KRAS                                                                                  | 328        | 60       | 9330      | 4.266768        | 0.2527134  | 0.0090984 | 0.006849 |
| KEGG_PAT | mmu04720  | Long-term potentiation           | 8     | 1.183432 | 0.008733 | GRIA1, PPP3CA, MAP2K1, EP300, MAPK1, BRAF, KRAS, PRKACB                                                                                         | 328        | 67       | 9330      | 3.396432        | 0.9038649  | 0.0423956 | 0.031916 |
| KEGG_PAT | mmu04726  | Serotonergic synapse             | 10    | 1.47929  | 0.040492 | MAP2K1, GNG5, DUSP1, GNAI3, CACNA1B, MAPK1, BRAF, KRAS, GNG12, PRKACB                                                                           | 328        | 131      | 9330      | 2.171383        | 0.9999839  | 0.1368526 | 0.103024 |
| KEGG_PAT | mmu04724  | Glutamatergic synapse            | 9     | 1.331361 | 0.046639 | GRIA1, PPP3CA, GNG5, SLC1A1, GNAI3, MAPK1, GNG12, PRKACB, ADCY6                                                                                 | 328        | 114      | 9330      | 2.245668        | 0.9999971  | 0.1537362 | 0.115734 |

**Table S29. Cell-cell interaction related KEGG pathways enriched in the predicted targets of upregulated genes of CRMCs of MS-CKO and KO mice**

| Category          | Term code | Term                             | Count | %        | PValue   | Genes                                                                                                                                                          | List Total | Pop Hits | Pop Total | Fold Enrichment | Bonferroni | Benjamini | FDR      |
|-------------------|-----------|----------------------------------|-------|----------|----------|----------------------------------------------------------------------------------------------------------------------------------------------------------------|------------|----------|-----------|-----------------|------------|-----------|----------|
| KEGG_PAT mmu04530 |           | Tight junction                   | 22    | 3.254438 | 3.81E-07 | MAG1, ITGB1, ACTR2, PRKCI, PRKCE, ARPC1B, NEDD4L, ARHGAP18, ARHGAP17, PRKCZ, RAP2C, PPP2CA, PPP2CB, TIAM1, MAPK9, CTTN, AMOTL2, RAC1, WHAMM, EZR, PRKACB, JAM2 | 328        | 168      | 9330      | 3.724956        | 1.02E-04   | 1.02E-04  | 7.65E-05 |
| KEGG_PAT mmu04810 |           | Regulation of actin cytoskeleton | 21    | 3.106509 | 1.72E-04 | ITGB1, ACTR2, MAP2K1, ARHGAP12, ITGA3, ARPC1B, BRAF, WASL, GNG12, TIAM1, PAK1, TMSB4X, MAPK1, KRAS, RAC1, EZR, PFN1, CRK, PPP1R12C, WASF2, PFN2                | 328        | 231      | 9330      | 2.58592         | 0.0449924  | 0.0028494 | 0.002145 |
| KEGG_PAT mmu04510 |           | Focal adhesion                   | 18    | 2.662722 | 7.60E-04 | ITGB1, MAP2K1, SHC1, ITGA3, CAV1, XIAP, BRAF, LAMC1, MAPK9, PAK1, CCND2, BCL2, MAPK1, GRB2, FYN, RAC1, CRK, PPP1R12C                                           | 328        | 203      | 9330      | 2.522228        | 0.1836956  | 0.0069962 | 0.005267 |
| KEGG_PAT mmu04520 |           | Adherens junction                | 10    | 1.47929  | 0.004819 | PTPN1, CSNK2A1, CTNND1, EP300, MAPK1, FYN, RAC1, WASL, WASF2, TGFBR1                                                                                           | 328        | 92       | 9330      | 3.091861        | 0.7246776  | 0.0268063 | 0.02018  |
| KEGG_PAT mmu04540 |           | Gap junction                     | 9     | 1.331361 | 0.01033  | MAP2K1, GNA11, GNAI3, MAPK1, GRB2, KRAS, CSNK1D, PRKACB, ADCY6                                                                                                 | 328        | 86       | 9330      | 2.976815        | 0.9374973  | 0.048119  | 0.036224 |















|        |                                                                                                                |          |          |          |            |          |          |             |             |           |
|--------|----------------------------------------------------------------------------------------------------------------|----------|----------|----------|------------|----------|----------|-------------|-------------|-----------|
| Q8VCG4 | Complement component C8 gamma chain OS=Mus musculus OX=10090 GN=C8g PE=1 SV=1                                  | 7.47E+04 | 6.89E+04 | 8.44E+04 | 48113.64   | 6.20E+04 | 6.09E+04 | 0.750246903 | 0.04037705  | 0.4270203 |
| Q9D154 | Leukocyte elastase inhibitor A OS=Mus musculus OX=10090 GN=Serpina1a PE=1 SV=1                                 | 8.49E+05 | 6.90E+05 | 6.91E+05 | 580403.33  | 5.44E+05 | 5.43E+05 | 0.747968653 | 0.026138178 | 0.3876421 |
| P70695 | Fructose-1,6-bisphosphatase isozyme 2 OS=Mus musculus OX=10090 GN=Fbp2 PE=1 SV=2                               | 3.02E+04 | 2.81E+04 | 2.89E+04 | 21461.96   | 1.91E+04 | 2.45E+04 | 0.746541962 | 0.01168346  | 0.3480419 |
| Q61233 | Plastin-2 OS=Mus musculus OX=10090 GN=Lcp1 PE=1 SV=4                                                           | 2.95E+05 | 2.83E+05 | 2.34E+05 | 202237.25  | 2.03E+05 | 1.97E+05 | 0.743357051 | 0.020875515 | 0.3559661 |
| B2RUR8 | OTU domain-containing protein 7B OS=Mus musculus OX=10090 GN=Otud7b PE=1 SV=1                                  | 1.99E+05 | 1.91E+05 | 2.16E+05 | 155456.58  | 1.59E+05 | 1.35E+05 | 0.741858176 | 0.007598796 | 0.3168862 |
| Q91WL8 | WW domain-containing oxidoreductase OS=Mus musculus OX=10090 GN=Wwox PE=1 SV=1                                 | 2.28E+03 | 2.52E+03 | 2.15E+03 | 1966.84    | 1.81E+03 | 1.38E+03 | 0.740262539 | 0.043007278 | 0.4270203 |
| P14220 | Glycophorin-A OS=Mus musculus OX=10090 GN=Gypa PE=1 SV=2                                                       | 4.52E+05 | 5.28E+05 | 4.02E+05 | 299810.58  | 3.66E+05 | 3.51E+05 | 0.735570079 | 0.043682911 | 0.4270203 |
| Q00897 | Alpha-1-antitrypsin 1-4 OS=Mus musculus OX=10090 GN=Serpina1d PE=1 SV=1                                        | 2.78E+05 | 3.34E+05 | 3.60E+05 | 208411.77  | 2.71E+05 | 2.27E+05 | 0.727049192 | 0.043631825 | 0.4270203 |
| Q09M02 | Cytosolic carboxypeptidase-like protein 5 OS=Mus musculus OX=10090 GN=Agbl5 PE=1 SV=2                          | 1.46E+05 | 1.58E+05 | 1.38E+05 | 113299.09  | 1.10E+05 | 9.56E+04 | 0.72169751  | 0.006841864 | 0.3110762 |
| Q5XPI3 | E3 ubiquitin-protein ligase RNF123 OS=Mus musculus OX=10090 GN=Rnf123 PE=1 SV=1                                | 1.22E+05 | 1.27E+05 | 1.16E+05 | 80282.42   | 1.09E+05 | 6.97E+04 | 0.708419662 | 0.043975445 | 0.4270203 |
| Q08331 | Calretinin OS=Mus musculus OX=10090 GN=Calb2 PE=1 SV=3                                                         | 2.22E+05 | 1.96E+05 | 2.12E+05 | 147288.10  | 1.54E+05 | 1.43E+05 | 0.706363875 | 0.00169626  | 0.2929367 |
| P17809 | Solute carrier family 2, facilitated glucose transporter member 1 OS=Mus musculus OX=10090 GN=Slc2a1 PE=1 SV=4 | 2.92E+05 | 3.36E+05 | 3.02E+05 | 240738.08  | 2.11E+05 | 2.00E+05 | 0.700382113 | 0.007010904 | 0.3110762 |
| Q01279 | Epidermal growth factor receptor OS=Mus musculus OX=10090 GN=Egfr PE=1 SV=1                                    | 2.46E+05 | 2.47E+05 | 2.39E+05 | 126737.96  | 1.78E+05 | 2.05E+05 | 0.695736769 | 0.032012111 | 0.3998493 |
| Q8C1A5 | Thimet oligopeptidase OS=Mus musculus OX=10090 GN=Thop1 PE=1 SV=1                                              | 1.34E+06 | 1.40E+06 | 1.38E+06 | 962469.56  | 9.66E+05 | 8.56E+05 | 0.676686024 | 0.000397161 | 0.158849  |
| B5X0G2 | Major urinary protein 17 OS=Mus musculus OX=10090 GN=Mup17 PE=2 SV=2                                           | 2.44E+05 | 2.68E+05 | 2.91E+05 | 179204.10  | 1.80E+05 | 1.79E+05 | 0.671538044 | 0.002736734 | 0.2962781 |
| P50114 | Protein S100-B OS=Mus musculus OX=10090 GN=S100b PE=1 SV=2                                                     | 1.95E+05 | 2.55E+05 | 2.35E+05 | 177929.80  | 1.50E+05 | 1.31E+05 | 0.670253137 | 0.028217111 | 0.3937240 |
| Q9D1X0 | Nucleolar protein 3 OS=Mus musculus OX=10090 GN=Nol3 PE=1 SV=1                                                 | 1.83E+05 | 1.72E+05 | 1.87E+05 | 114302.59  | 1.06E+05 | 1.08E+05 | 0.60462554  | 0.000151497 | 0.100290  |
| P12658 | Calbindin OS=Mus musculus OX=10090 GN=Calb1 PE=1 SV=2                                                          | 7.08E+04 | 4.74E+04 | 4.79E+04 | 32459.01   | 3.40E+04 | 3.17E+04 | 0.590972729 | 0.043214824 | 0.4270203 |
| Q8VEL9 | GTP-binding protein REM 2 OS=Mus musculus OX=10090 GN=Rem2 PE=1 SV=2                                           | 3.34E+05 | 2.52E+05 | 2.64E+05 | 164520.35  | 1.69E+05 | 1.61E+05 | 0.581548242 | 0.010120939 | 0.340681  |
| Q8K182 | Complement component C8 alpha chain OS=Mus musculus OX=10090 GN=C8a PE=1 SV=1                                  | 1.94E+04 | 1.98E+04 | 2.27E+04 | 8729.53    | 1.28E+04 | 1.32E+04 | 0.560234077 | 0.006847886 | 0.3110762 |
| Q8BH35 | Complement component C8 beta chain OS=Mus musculus OX=10090 GN=C8b PE=1 SV=1                                   | 3.00E+05 | 3.28E+05 | 3.12E+05 | 105803.76  | 2.04E+05 | 1.98E+05 | 0.539409138 | 0.011519568 | 0.3480419 |
| Q00898 | Alpha-1-antitrypsin 1-5 OS=Mus musculus OX=10090 GN=Serpina1e PE=1 SV=1                                        | 6.74E+06 | 7.31E+06 | 8.01E+06 | 2779717.18 | 3.60E+06 | 4.86E+06 | 0.50957497  | 0.007033367 | 0.3110762 |
| P06683 | Complement component C9 OS=Mus musculus OX=10090 GN=C9 PE=1 SV=2                                               | 1.62E+04 | 1.66E+04 | 1.94E+04 | 5047.90    | 1.02E+04 | 1.07E+04 | 0.496833335 | 0.013232151 | 0.3480419 |

**Table S31. miR-183C target genes among upregulated protein in TG of miR-183C KO vs WT control mice.**

| Accession | Gene Name       | Description                                                                                                               | WT TG1   | WT TG2   | WT TG3   | KO TG1   | KO TG2   | KO TG3   | Fold Changes | pVal            | q-value |
|-----------|-----------------|---------------------------------------------------------------------------------------------------------------------------|----------|----------|----------|----------|----------|----------|--------------|-----------------|---------|
| Q3UJH0    | <b>Aak1</b>     | AP2-associated protein kinase 1 OS=Mus musculus OX=10090 GN=Aak1 PE=1 SV=2                                                | 5.81E+05 | 5.76E+05 | 5.82E+05 | 6.10E+05 | 5.92E+05 | 6.11E+05 | 1.04         | <b>1.66E-02</b> | 0.3490  |
| P41234    | <b>Abca2</b>    | ATP-binding cassette sub-family A member 2 OS=Mus musculus OX=10090 GN=Abca2 PE=1 SV=4                                    | 1.96E+05 | 2.13E+05 | 2.11E+05 | 2.62E+05 | 2.40E+05 | 2.30E+05 | 1.18         | <b>2.69E-02</b> | 0.3876  |
| Q8CJG0    | <b>Ago2</b>     | Protein argonaute-2 OS=Mus musculus OX=10090 GN=Ago2 PE=1 SV=3                                                            | 8.11E+04 | 8.50E+04 | 8.88E+04 | 9.79E+04 | 9.99E+04 | 9.06E+04 | 1.13         | <b>3.61E-02</b> | 0.4144  |
| Q64362    | <b>Aktip</b>    | AKT-interacting protein OS=Mus musculus OX=10090 GN=Aktip PE=1 SV=1                                                       | 1.57E+05 | 1.92E+05 | 2.13E+05 | 2.59E+05 | 2.46E+05 | 2.57E+05 | 1.35         | <b>1.68E-02</b> | 0.3490  |
| Q9QWY8    | <b>Asap1</b>    | Arf-GAP with SH3 domain, ANK repeat and PH domain-containing protein 1 OS=Mus musculus OX=10090 GN=Asap1 PE=1 SV=2        | 1.81E+05 | 1.71E+05 | 1.87E+05 | 2.06E+05 | 1.90E+05 | 2.08E+05 | 1.12         | <b>4.41E-02</b> | 0.4270  |
| Q35855    | <b>Bcat2</b>    | Branched-chain-amino-acid aminotransferase, mitochondrial OS=Mus musculus OX=10090 GN=Bcat2 PE=1 SV=2                     | 7.21E+05 | 7.14E+05 | 7.24E+05 | 7.58E+05 | 7.69E+05 | 7.52E+05 | 1.05         | <b>2.39E-03</b> | 0.2963  |
| Q6PH59    | <b>Cacna2d2</b> | Voltage-dependent calcium channel subunit alpha-2/delta-2 OS=Mus musculus OX=10090 GN=Cacna2d2 PE=1 SV=1                  | 4.13E+05 | 4.10E+05 | 4.35E+05 | 5.99E+05 | 5.72E+05 | 5.31E+05 | 1.35         | <b>2.22E-03</b> | 0.2963  |
| Q80U49    | <b>Cep170b</b>  | Centrosomal protein of 170 kDa protein B OS=Mus musculus OX=10090 GN=Cep170b PE=1 SV=2                                    | 2.54E+04 | 3.74E+04 | 3.52E+04 | 5.66E+04 | 5.17E+04 | 5.14E+04 | 1.63         | <b>7.07E-03</b> | 0.3111  |
| Q9D5R3    | <b>Cep83</b>    | Centrosomal protein of 83 kDa OS=Mus musculus OX=10090 GN=Cep83 PE=1 SV=2                                                 | 8.85E+03 | 1.01E+04 | 9.92E+03 | 1.07E+04 | 1.05E+04 | 1.11E+04 | 1.12         | <b>4.73E-02</b> | 0.4329  |
| P70232    | <b>Ch1</b>      | Neural cell adhesion molecule L1-like protein OS=Mus musculus OX=10090 GN=Ch1 PE=1 SV=2                                   | 1.08E+05 | 1.15E+05 | 1.07E+05 | 1.18E+05 | 1.17E+05 | 1.18E+05 | 1.07         | <b>4.71E-02</b> | 0.4329  |
| Q9WUM4    | <b>Coro1c</b>   | Coronin-1C OS=Mus musculus OX=10090 GN=Coro1c PE=1 SV=2                                                                   | 1.25E+05 | 1.25E+05 | 1.24E+05 | 1.26E+05 | 1.27E+05 | 1.28E+05 | 1.02         | <b>3.58E-02</b> | 0.4130  |
| Q8BTV2    | <b>Cpsf7</b>    | Cleavage and polyadenylation specificity factor subunit 7 OS=Mus musculus OX=10090 GN=Cpsf7 PE=1 SV=2                     | 1.74E+05 | 1.74E+05 | 1.61E+05 | 1.87E+05 | 1.83E+05 | 1.87E+05 | 1.09         | <b>2.34E-02</b> | 0.3637  |
| Q01147    | <b>Creb1</b>    | Cyclic AMP-responsive element-binding protein 1 OS=Mus musculus OX=10090 GN=Creb1 PE=1 SV=2                               | 2.54E+05 | 2.54E+05 | 2.80E+05 | 3.06E+05 | 3.17E+05 | 2.86E+05 | 1.15         | <b>3.24E-02</b> | 0.4018  |
| Q68ED7    | <b>Crtc1</b>    | CREB-regulated transcription coactivator 1 OS=Mus musculus OX=10090 GN=Crtc1 PE=1 SV=1                                    | 5.00E+04 | 5.26E+04 | 5.22E+04 | 6.16E+04 | 5.97E+04 | 5.63E+04 | 1.15         | <b>1.19E-02</b> | 0.3480  |
| P10605    | <b>Ctsb</b>     | Cathepsin B OS=Mus musculus OX=10090 GN=Ctsb PE=1 SV=2                                                                    | 4.50E+05 | 4.30E+05 | 4.46E+05 | 4.71E+05 | 5.04E+05 | 5.40E+05 | 1.14         | <b>3.96E-02</b> | 0.4270  |
| Q91WG7    | <b>Dgkg</b>     | Diacylglycerol kinase gamma OS=Mus musculus OX=10090 GN=Dgkg PE=1 SV=1                                                    | 1.77E+05 | 1.80E+05 | 1.81E+05 | 1.88E+05 | 1.91E+05 | 1.97E+05 | 1.07         | <b>1.00E-02</b> | 0.3407  |
| Q8BL66    | <b>Eea1</b>     | Early endosome antigen 1 OS=Mus musculus OX=10090 GN=Eea1 PE=1 SV=2                                                       | 2.45E+05 | 2.77E+05 | 2.53E+05 | 3.09E+05 | 2.84E+05 | 3.04E+05 | 1.16         | <b>3.04E-02</b> | 0.3967  |
| P70372    | <b>Elavl1</b>   | ELAV-like protein 1 OS=Mus musculus OX=10090 GN=Elavl1 PE=1 SV=2                                                          | 4.80E+05 | 4.85E+05 | 5.00E+05 | 5.30E+05 | 5.18E+05 | 5.31E+05 | 1.06         | <b>2.37E-02</b> | 0.3646  |
| Q8C3F2    | <b>Fam120c</b>  | Constitutive coactivator of PPAR-gamma-like protein 2 OS=Mus musculus OX=10090 GN=Fam120c PE=1 SV=3                       | 3.88E+05 | 4.11E+05 | 4.27E+05 | 4.46E+05 | 4.49E+05 | 4.35E+05 | 1.08         | <b>4.69E-02</b> | 0.4329  |
| Q922G0    | <b>Fem1b</b>    | Protein fem-1 homolog B OS=Mus musculus OX=10090 GN=Fem1b PE=1 SV=1                                                       | 5.63E+03 | 7.24E+03 | 5.96E+03 | 7.96E+03 | 7.53E+03 | 7.71E+03 | 1.23         | <b>4.49E-02</b> | 0.4294  |
| Q6PB93    | <b>Galnt2</b>   | Polypeptide N-acetylgalactosaminyltransferase 2 OS=Mus musculus OX=10090 GN=Galnt2 PE=1 SV=1                              | 2.57E+05 | 2.84E+05 | 2.88E+05 | 3.22E+05 | 3.14E+05 | 3.16E+05 | 1.15         | <b>1.49E-02</b> | 0.3490  |
| Q8BUY8    | <b>Grasp2</b>   | G-protein coupled receptor-associated sorting protein 2 OS=Mus musculus OX=10090 GN=Grasp2 PE=1 SV=2                      | 1.13E+05 | 1.09E+05 | 1.13E+05 | 1.29E+05 | 1.24E+05 | 1.22E+05 | 1.12         | <b>4.58E-03</b> | 0.2963  |
| P97825    | <b>Hn1</b>      | Jupiter microtubule associated homolog 1 OS=Mus musculus OX=10090 GN=Hn1 PE=1 SV=3                                        | 5.20E+04 | 4.92E+04 | 5.50E+04 | 6.14E+04 | 6.64E+04 | 7.25E+04 | 1.28         | <b>1.53E-02</b> | 0.3490  |
| P49312    | <b>Hnrrnp1</b>  | Heterogeneous nuclear ribonucleoprotein A1 OS=Mus musculus OX=10090 GN=Hnrrnp1 PE=1 SV=2                                  | 1.18E+06 | 1.19E+06 | 1.21E+06 | 1.28E+06 | 1.30E+06 | 1.27E+06 | 1.08         | <b>1.34E-03</b> | 0.2586  |
| Q8BUK6    | <b>Hook3</b>    | Protein Hook homolog 3 OS=Mus musculus OX=10090 GN=Hook3 PE=1 SV=2                                                        | 5.54E+05 | 6.32E+05 | 6.20E+05 | 7.55E+05 | 7.35E+05 | 6.84E+05 | 1.20         | <b>1.88E-02</b> | 0.3522  |
| P11627    | <b>L1cam</b>    | Neural cell adhesion molecule L1 OS=Mus musculus OX=10090 GN=L1cam PE=1 SV=1                                              | 1.88E+05 | 1.95E+05 | 2.01E+05 | 2.40E+05 | 2.27E+05 | 2.43E+05 | 1.22         | <b>2.53E-03</b> | 0.2963  |
| P31938    | <b>Map2k1</b>   | Dual specificity mitogen-activated protein kinase kinase 1 OS=Mus musculus OX=10090 GN=Map2k1 PE=1 SV=2                   | 2.94E+05 | 2.99E+05 | 2.98E+05 | 3.50E+05 | 3.35E+05 | 3.39E+05 | 1.15         | <b>6.40E-04</b> | 0.1588  |
| P26645    | <b>Marcks</b>   | Myristoylated alanine-rich C-kinase substrate OS=Mus musculus OX=10090 GN=Marcks PE=1 SV=2                                | 3.98E+05 | 3.92E+05 | 4.05E+05 | 4.57E+05 | 4.17E+05 | 4.49E+05 | 1.11         | <b>2.68E-02</b> | 0.3876  |
| Q8CF10    | <b>Nedd4l</b>   | E3 ubiquitin-protein ligase NEDD4-like OS=Mus musculus OX=10090 GN=Nedd4l PE=1 SV=2                                       | 1.89E+05 | 1.90E+05 | 1.87E+05 | 2.12E+05 | 2.02E+05 | 2.18E+05 | 1.12         | <b>9.58E-03</b> | 0.3281  |
| Q3UHB1    | <b>Nt5dc3</b>   | 5'-nucleotidase domain-containing protein 3 OS=Mus musculus OX=10090 GN=Nt5dc3 PE=1 SV=1                                  | 8.59E+05 | 9.15E+05 | 9.02E+05 | 1.02E+06 | 1.01E+06 | 9.38E+05 | 1.11         | <b>3.53E-02</b> | 0.4129  |
| B9EJ86    | <b>Osbpl8</b>   | Oxysterol-binding protein-related protein 8 OS=Mus musculus OX=10090 GN=Osbpl8 PE=1 SV=1                                  | 1.11E+05 | 1.02E+05 | 1.08E+05 | 1.22E+05 | 1.15E+05 | 1.18E+05 | 1.11         | <b>3.46E-02</b> | 0.4129  |
| Q9JK42    | <b>Pdk2</b>     | [Pyruvate dehydrogenase (acetyl-transferring)] kinase isozyme 2, mitochondrial OS=Mus musculus OX=10090 GN=Pdk2 PE=1 SV=2 | 4.43E+04 | 4.94E+04 | 5.14E+04 | 6.28E+04 | 6.00E+04 | 5.87E+04 | 1.25         | <b>7.66E-03</b> | 0.3169  |
| Q9DOW5    | <b>Ppil1</b>    | Peptidyl-prolyl cis-trans isomerase-like 1 OS=Mus musculus OX=10090 GN=Ppil1 PE=1 SV=1                                    | 2.58E+05 | 2.63E+05 | 2.48E+05 | 2.84E+05 | 2.81E+05 | 2.69E+05 | 1.08         | <b>2.87E-02</b> | 0.3937  |
| P63328    | <b>Ppp3ca</b>   | Serine/threonine-protein phosphatase 2B catalytic subunit alpha isoform OS=Mus musculus OX=10090 GN=Ppp3ca PE=1 SV=1      | 1.98E+05 | 2.02E+05 | 2.10E+05 | 2.32E+05 | 2.21E+05 | 2.17E+05 | 1.10         | <b>2.69E-02</b> | 0.3876  |
| Q8C167    | <b>Prepl</b>    | Prolyl endopeptidase-like OS=Mus musculus OX=10090 GN=Prepl PE=1 SV=1                                                     | 8.10E+05 | 8.14E+05 | 8.21E+05 | 8.79E+05 | 8.81E+05 | 8.41E+05 | 1.06         | <b>1.87E-02</b> | 0.3522  |
| P16054    | <b>Prkce</b>    | Protein kinase C epsilon type OS=Mus musculus OX=10090 GN=Prkce PE=1 SV=1                                                 | 2.92E+05 | 3.43E+05 | 3.33E+05 | 4.19E+05 | 3.86E+05 | 3.59E+05 | 1.20         | <b>4.88E-02</b> | 0.4388  |
| B2RY56    | <b>Rbm25</b>    | RNA-binding protein 25 OS=Mus musculus OX=10090 GN=Rbm25 PE=1 SV=2                                                        | 3.69E+05 | 4.16E+05 | 3.50E+05 | 4.54E+05 | 4.29E+05 | 4.36E+05 | 1.16         | <b>4.39E-02</b> | 0.4270  |
| Q9R0P6    | <b>Sec11a</b>   | Signal peptidase complex catalytic subunit SEC11A OS=Mus musculus OX=10090 GN=Sec11a PE=1 SV=1                            | 3.76E+04 | 3.77E+04 | 3.60E+04 | 4.12E+04 | 3.91E+04 | 4.09E+04 | 1.09         | <b>1.73E-02</b> | 0.3490  |
| Q60520    | <b>Sin3a</b>    | Paired amphipathic helix protein Sin3a OS=Mus musculus OX=10090 GN=Sin3a PE=1 SV=3                                        | 2.44E+05 | 2.53E+05 | 2.56E+05 | 2.99E+05 | 2.84E+05 | 2.76E+05 | 1.14         | <b>9.56E-03</b> | 0.3281  |
| Q8JZU2    | <b>Slc25a1</b>  | Tricarboxylate transport protein, mitochondrial OS=Mus musculus OX=10090 GN=Slc25a1 PE=1 SV=1                             | 2.49E+05 | 3.05E+05 | 2.94E+05 | 4.78E+05 | 3.99E+05 | 4.21E+05 | 1.53         | <b>6.90E-03</b> | 0.3111  |
| A2ASZ8    | <b>Slc25a25</b> | Calcium-binding mitochondrial carrier protein SCA25 OS=Mus musculus OX=10090 GN=Slc25a25 PE=1 SV=1                        | 2.04E+05 | 1.98E+05 | 1.97E+05 | 2.25E+05 | 2.27E+05 | 2.12E+05 | 1.11         | <b>1.62E-02</b> | 0.3490  |
| Q62093    | <b>Srsf2</b>    | Serine/arginine-rich splicing factor 2 OS=Mus musculus OX=10090 GN=Srsf2 PE=1 SV=4                                        | 6.68E+04 | 6.62E+04 | 6.93E+04 | 7.18E+04 | 7.03E+04 | 7.07E+04 | 1.05         | <b>2.78E-02</b> | 0.3937  |
| Q8VBTO    | <b>Tmx1</b>     | Thioredoxin-related transmembrane protein 1 OS=Mus musculus OX=10090 GN=Tmx1 PE=1 SV=1                                    | 5.56E+04 | 5.50E+04 | 5.42E+04 | 6.35E+04 | 5.99E+04 | 6.41E+04 | 1.14         | <b>5.65E-03</b> | 0.3029  |
| Q8C0L0    | <b>Tmx4</b>     | Thioredoxin-related transmembrane protein 4 OS=Mus musculus OX=10090 GN=Tmx4 PE=1 SV=2                                    | 2.29E+05 | 2.76E+05 | 2.58E+05 | 3.04E+05 | 2.92E+05 | 2.95E+05 | 1.17         | <b>3.83E-02</b> | 0.4247  |
| Q55S25    | <b>Tns3</b>     | Tensin-3 OS=Mus musculus OX=10090 GN=Tns3 PE=1 SV=1                                                                       | 1.10E+05 | 1.12E+05 | 1.20E+05 | 1.25E+05 | 1.30E+05 | 1.37E+05 | 1.15         | <b>1.99E-02</b> | 0.3522  |
| Q9FSN6    | <b>Trim2</b>    | Tripartite motif-containing protein 2 OS=Mus musculus OX=10090 GN=Trim2 PE=1 SV=1                                         | 3.96E+05 | 3.75E+05 | 4.12E+05 | 4.30E+05 | 4.25E+05 | 4.24E+05 | 1.08         | <b>4.25E-02</b> | 0.4270  |
| Q9QZE7    | <b>Tsnax</b>    | Translin-associated protein X OS=Mus musculus OX=10090 GN=Tsnax PE=1 SV=1                                                 | 2.95E+05 | 3.00E+05 | 2.72E+05 | 3.41E+05 | 3.21E+05 | 3.17E+05 | 1.13         | <b>3.25E-02</b> | 0.4020  |



**Table S32. Dysregulated genes at protein levels in the cornea of miR-183C KO vs WT control mice.**

| Accession                  | Description                                                                                                 | WT Cornea1 | WT Cornea2 | WT Cornea3 | KO Cornea1 | KO Cornea2 | KO Cornea3 | Fold Changes | pVal          | q-value |
|----------------------------|-------------------------------------------------------------------------------------------------------------|------------|------------|------------|------------|------------|------------|--------------|---------------|---------|
| <b>Upregulated (48)</b>    |                                                                                                             |            |            |            |            |            |            |              |               |         |
| P01867                     | Ig gamma-2B chain C region OS=Mus musculus OX=10090 GN=Igh-3 PE=1 SV=3                                      | 2.71E+05   | 3.13E+05   | 2.37E+05   | 4.89E+05   | 5.57E+05   | 3.85E+05   | 1.74         | <b>0.0203</b> | 0.855   |
| Q05816                     | Fatty acid-binding protein 5 OS=Mus musculus OX=10090 GN=Fabp5 PE=1 SV=3                                    | 1.77E+05   | 2.21E+05   | 1.46E+05   | 2.76E+05   | 3.01E+05   | 2.94E+05   | 1.60         | <b>0.0090</b> | 0.708   |
| P01837                     | Immunoglobulin kappa constant OS=Mus musculus OX=10090 GN=Ilgk PE=1 SV=2                                    | 1.39E+05   | 1.72E+05   | 1.20E+05   | 2.18E+05   | 2.78E+05   | 1.91E+05   | 1.59         | <b>0.0458</b> | 0.922   |
| P01723                     | Ig lambda-b1 chain V region OS=Mus musculus OX=10090 PE=1 SV=2                                              | 1.00E+05   | 1.23E+05   | 1.23E+05   | 1.48E+05   | 2.14E+05   | 1.77E+05   | 1.52         | <b>0.0441</b> | 0.922   |
| P01633                     | Ig kappa chain V19-17 OS=Mus musculus OX=10090 GN=Ilgk-V19-17 PE=1 SV=1                                     | 9.28E+04   | 1.28E+05   | 9.64E+04   | 1.67E+05   | 1.79E+05   | 1.32E+05   | 1.51         | <b>0.0401</b> | 0.922   |
| Q9CWM4                     | Prefoldin subunit 1 OS=Mus musculus OX=10090 GN=Pfdn1 PE=1 SV=1                                             | 8.61E+04   | 9.20E+04   | 8.43E+04   | 1.32E+05   | 9.81E+04   | 1.24E+05   | 1.35         | <b>0.0428</b> | 0.922   |
| Q8C838                     | Trafficking regulator of GLUT4 1 OS=Mus musculus OX=10090 GN=Trarg1 PE=1 SV=1                               | 3.52E+04   | 4.40E+04   | 4.54E+04   | 5.62E+04   | 5.32E+04   | 5.57E+04   | 1.33         | <b>0.0153</b> | 0.806   |
| O55112                     | AF4/FMR2 family member 2 OS=Mus musculus OX=10090 GN=Aff2 PE=2 SV=2                                         | 3.32E+05   | 2.92E+05   | 3.92E+05   | 4.58E+05   | 4.12E+05   | 4.69E+05   | 1.32         | <b>0.0337</b> | 0.881   |
| O89053                     | Coronin-1A OS=Mus musculus OX=10090 GN=Coro1a PE=1 SV=5                                                     | 6.01E+04   | 7.12E+04   | 8.01E+04   | 9.15E+04   | 9.28E+04   | 9.05E+04   | 1.30         | <b>0.0219</b> | 0.879   |
| Q9CWS0                     | N(G),N(G)-dimethylarginine dimethylaminohydrolase 1 OS=Mus musculus OX=10090 GN=Ddah1 PE=1 SV=3             | 1.27E+05   | 1.13E+05   | 1.22E+05   | 1.63E+05   | 1.46E+05   | 1.55E+05   | 1.28         | <b>0.0052</b> | 0.555   |
| Q8K2Y9                     | Cerebral cavernous malformations protein 2 homolog OS=Mus musculus OX=10090 GN=Ccm2 PE=1 SV=1               | 3.27E+06   | 2.79E+06   | 2.91E+06   | 3.55E+06   | 4.09E+06   | 3.73E+06   | 1.27         | <b>0.0201</b> | 0.855   |
| Q8BUV8                     | Protein GPR107 OS=Mus musculus OX=10090 GN=Gpr107 PE=1 SV=2                                                 | 1.57E+05   | 1.51E+05   | 1.59E+05   | 1.84E+05   | 2.03E+05   | 2.01E+05   | 1.26         | <b>0.0031</b> | 0.483   |
| Q64471                     | Glutathione S-transferase theta-1 OS=Mus musculus OX=10090 GN=Gstt1 PE=1 SV=4                               | 2.33E+05   | 2.27E+05   | 2.14E+05   | 2.76E+05   | 2.75E+05   | 2.91E+05   | 1.25         | <b>0.0017</b> | 0.483   |
| Q8BIQ5                     | Cleavage stimulation factor subunit 2 OS=Mus musculus OX=10090 GN=Cstf2 PE=1 SV=2                           | 8.31E+04   | 8.02E+04   | 1.03E+05   | 1.13E+05   | 1.11E+05   | 1.25E+05   | 1.25         | <b>0.0389</b> | 0.922   |
| Q9DBC7                     | cAMP-dependent protein kinase type I-alpha regulatory subunit OS=Mus musculus OX=10090 GN=Prkar1a PE=1 SV=3 | 2.05E+05   | 1.79E+05   | 2.21E+05   | 2.55E+05   | 2.35E+05   | 2.51E+05   | 1.22         | <b>0.0286</b> | 0.879   |
| P01869                     | Ig gamma-1 chain C region, membrane-bound form OS=Mus musculus OX=10090 GN=Ighg1 PE=1 SV=2                  | 1.38E+05   | 1.57E+05   | 1.36E+05   | 1.83E+05   | 1.63E+05   | 1.77E+05   | 1.21         | <b>0.0280</b> | 0.879   |
| Q60952                     | Centrosome-associated protein CEP250 OS=Mus musculus OX=10090 GN=Cep250 PE=1 SV=4                           | 1.04E+04   | 1.01E+04   | 1.04E+04   | 1.27E+04   | 1.19E+04   | 1.26E+04   | 1.20         | <b>0.0018</b> | 0.483   |
| Q920F7                     | Gamma-synuclein OS=Mus musculus OX=10090 GN=Sncg PE=1 SV=1                                                  | 1.32E+05   | 1.40E+05   | 1.59E+05   | 1.74E+05   | 1.77E+05   | 1.69E+05   | 1.20         | <b>0.0230</b> | 0.879   |
| Q60715                     | Prolyl 4-hydroxylase subunit alpha-1 OS=Mus musculus OX=10090 GN=P4ha1 PE=1 SV=2                            | 1.15E+05   | 1.16E+05   | 1.30E+05   | 1.31E+05   | 1.45E+05   | 1.46E+05   | 1.17         | <b>0.0445</b> | 0.922   |
| P19137                     | Laminin subunit alpha-1 OS=Mus musculus OX=10090 GN=Lama1 PE=1 SV=2                                         | 3.51E+05   | 3.32E+05   | 3.37E+05   | 3.76E+05   | 3.85E+05   | 4.17E+05   | 1.15         | <b>0.0192</b> | 0.855   |
| Q9CQ65                     | S-methyl-5'-thioadenosine phosphorylase OS=Mus musculus OX=10090 GN=Map PE=1 SV=1                           | 3.43E+05   | 3.14E+05   | 2.94E+05   | 3.83E+05   | 3.54E+05   | 3.62E+05   | 1.15         | <b>0.0418</b> | 0.922   |
| O70378                     | ER membrane protein complex subunit 8 OS=Mus musculus OX=10090 GN=Emc8 PE=1 SV=1                            | 7.32E+04   | 8.46E+04   | 7.23E+04   | 8.95E+04   | 8.96E+04   | 8.63E+04   | 1.15         | <b>0.0454</b> | 0.922   |
| P13020                     | Gelsolin OS=Mus musculus OX=10090 GN=Gsn PE=1 SV=3                                                          | 5.37E+05   | 5.11E+05   | 5.34E+05   | 5.59E+05   | 5.99E+05   | 6.42E+05   | 1.14         | <b>0.0454</b> | 0.922   |
| Q8BFW7                     | Lipoma-preferred partner homolog OS=Mus musculus OX=10090 GN=Lpp PE=1 SV=1                                  | 1.51E+05   | 1.40E+05   | 1.42E+05   | 1.66E+05   | 1.57E+05   | 1.64E+05   | 1.13         | <b>0.0114</b> | 0.778   |
| O35638                     | Cohesin subunit SA-2 OS=Mus musculus OX=10090 GN=Stag2 PE=1 SV=3                                            | 2.56E+04   | 2.54E+04   | 2.53E+04   | 2.78E+04   | 2.80E+04   | 2.99E+04   | 1.12         | <b>0.0104</b> | 0.778   |
| Q4KMM3                     | Oxidation resistance protein 1 OS=Mus musculus OX=10090 GN=Oxr1 PE=1 SV=3                                   | 4.71E+05   | 4.51E+05   | 4.69E+05   | 5.49E+05   | 5.03E+05   | 5.04E+05   | 1.12         | <b>0.0290</b> | 0.879   |
| Q80WR5                     | UPF0688 protein C1orf174 homolog OS=Mus musculus OX=10090 PE=1 SV=1                                         | 8.68E+04   | 7.76E+04   | 8.32E+04   | 8.97E+04   | 9.40E+04   | 9.32E+04   | 1.12         | <b>0.0304</b> | 0.879   |
| Q06180                     | Tyrosine-protein phosphatase non-receptor type 2 OS=Mus musculus OX=10090 GN=Ptpn2 PE=1 SV=2                | 2.58E+04   | 2.51E+04   | 2.74E+04   | 2.91E+04   | 2.96E+04   | 2.86E+04   | 1.12         | <b>0.0150</b> | 0.806   |
| Q6X893                     | Choline transporter-like protein 1 OS=Mus musculus OX=10090 GN=Slc44a1 PE=1 SV=3                            | 4.29E+04   | 4.19E+04   | 4.57E+04   | 4.73E+04   | 4.74E+04   | 5.06E+04   | 1.11         | <b>0.0338</b> | 0.881   |
| Q92125                     | Tumor necrosis factor alpha-induced protein 8 OS=Mus musculus OX=10090 GN=Tnfrifp8 PE=1 SV=1                | 4.99E+04   | 5.30E+04   | 5.10E+04   | 5.62E+04   | 5.63E+04   | 5.86E+04   | 1.11         | <b>0.0084</b> | 0.678   |
| P20152                     | Vimentin OS=Mus musculus OX=10090 GN=Vim PE=1 SV=3                                                          | 6.42E+05   | 6.25E+05   | 6.20E+05   | 6.96E+05   | 6.89E+05   | 7.10E+05   | 1.11         | <b>0.0016</b> | 0.483   |
| Q9DB34                     | Charged multivesicular body protein 2a OS=Mus musculus OX=10090 GN=Chmp2a PE=1 SV=1                         | 2.02E+05   | 2.00E+05   | 2.09E+05   | 2.20E+05   | 2.19E+05   | 2.38E+05   | 1.11         | <b>0.0298</b> | 0.879   |
| O88696                     | ATP-dependent Clp protease proteolytic subunit, mitochondrial OS=Mus musculus OX=10090 GN=Clpp PE=1 SV=1    | 1.18E+05   | 1.19E+05   | 1.25E+05   | 1.31E+05   | 1.29E+05   | 1.39E+05   | 1.10         | <b>0.0305</b> | 0.879   |
| P19783                     | Cytochrome c oxidase subunit 4 isoform 1, mitochondrial OS=Mus musculus OX=10090 GN=Cox4i1 PE=1 SV=2        | 1.42E+05   | 1.53E+05   | 1.41E+05   | 1.58E+05   | 1.57E+05   | 1.63E+05   | 1.09         | <b>0.0341</b> | 0.881   |
| Q8C460                     | ERI1 exoribonuclease 3 OS=Mus musculus OX=10090 GN=Eri3 PE=1 SV=1                                           | 1.69E+05   | 1.72E+05   | 1.73E+05   | 1.80E+05   | 1.91E+05   | 1.90E+05   | 1.09         | <b>0.0116</b> | 0.778   |
| Q9DB29                     | Isoamyl acetate-hydrolyzing esterase 1 homolog OS=Mus musculus OX=10090 GN=lah1 PE=1 SV=1                   | 4.31E+05   | 4.00E+05   | 4.22E+05   | 4.56E+05   | 4.51E+05   | 4.63E+05   | 1.09         | <b>0.0175</b> | 0.833   |
| O35309                     | N-myc-interactor OS=Mus musculus OX=10090 GN=Nmi PE=1 SV=1                                                  | 2.10E+05   | 2.09E+05   | 2.10E+05   | 2.23E+05   | 2.32E+05   | 2.26E+05   | 1.08         | <b>0.0030</b> | 0.483   |
| Q01768                     | Nucleoside diphosphate kinase B OS=Mus musculus OX=10090 GN=Nme2 PE=1 SV=1                                  | 8.88E+05   | 8.56E+05   | 8.04E+05   | 9.13E+05   | 9.21E+05   | 9.27E+05   | 1.08         | <b>0.0466</b> | 0.925   |
| Q9CZW5                     | Mitochondrial import receptor subunit TOM70 OS=Mus musculus OX=10090 GN=Tomm70 PE=1 SV=2                    | 2.61E+05   | 2.59E+05   | 2.76E+05   | 2.78E+05   | 2.97E+05   | 2.86E+05   | 1.08         | <b>0.0485</b> | 0.952   |
| P62996                     | Transformer-2 protein homolog beta OS=Mus musculus OX=10090 GN=Tra2b PE=1 SV=1                              | 2.70E+05   | 2.65E+05   | 2.68E+05   | 2.90E+05   | 2.89E+05   | 2.88E+05   | 1.08         | <b>0.0002</b> | 0.483   |
| Q8BH97                     | Reticulocalbin-3 OS=Mus musculus OX=10090 GN=Rcn3 PE=1 SV=1                                                 | 8.02E+04   | 7.89E+04   | 7.97E+04   | 8.22E+04   | 8.67E+04   | 8.85E+04   | 1.08         | <b>0.0309</b> | 0.881   |
| Q60634                     | Flotillin-2 OS=Mus musculus OX=10090 GN=Flot2 PE=1 SV=2                                                     | 4.58E+04   | 4.31E+04   | 4.54E+04   | 4.77E+04   | 4.75E+04   | 4.87E+04   | 1.07         | <b>0.0263</b> | 0.879   |
| Q80T21                     | ADAMTS-like protein 4 OS=Mus musculus OX=10090 GN=Adamts4 PE=2 SV=1                                         | 4.32E+04   | 4.20E+04   | 4.34E+04   | 4.51E+04   | 4.64E+04   | 4.53E+04   | 1.06         | <b>0.0111</b> | 0.778   |
| Q6PDY2                     | 2-aminoethanethiol dioxygenase OS=Mus musculus OX=10090 GN=Ado PE=1 SV=2                                    | 3.54E+05   | 3.34E+05   | 3.49E+05   | 3.70E+05   | 3.64E+05   | 3.65E+05   | 1.06         | <b>0.0303</b> | 0.879   |
| Q9QY59                     | Protein quaking OS=Mus musculus OX=10090 GN=Qki PE=1 SV=1                                                   | 4.51E+05   | 4.45E+05   | 4.33E+05   | 4.58E+05   | 4.76E+05   | 4.68E+05   | 1.05         | <b>0.0342</b> | 0.881   |
| Q9CRB2                     | H/ACA ribonucleoprotein complex subunit 2 OS=Mus musculus OX=10090 GN=Nhp2 PE=1 SV=1                        | 6.17E+04   | 6.24E+04   | 6.04E+04   | 6.51E+04   | 6.27E+04   | 6.55E+04   | 1.05         | <b>0.0491</b> | 0.957   |
| Q9R069                     | Basal cell adhesion molecule OS=Mus musculus OX=10090 GN=Bcam PE=1 SV=1                                     | 2.64E+05   | 2.59E+05   | 2.56E+05   | 2.75E+05   | 2.68E+05   | 2.69E+05   | 1.04         | <b>0.0247</b> | 0.879   |
| Q9DCC4                     | Pyrrrole-5-carboxylate reductase 3 OS=Mus musculus OX=10090 GN=Pycr3 PE=1 SV=2                              | 8.68E+04   | 8.86E+04   | 8.65E+04   | 9.02E+04   | 8.97E+04   | 9.15E+04   | 1.04         | <b>0.0192</b> | 0.855   |
| <b>Downregulated (115)</b> |                                                                                                             |            |            |            |            |            |            |              |               |         |
| Q8BWM0                     | Prostaglandin E synthase 2 OS=Mus musculus OX=10090 GN=Ptges2 PE=1 SV=3                                     | 3.16E+05   | 3.08E+05   | 3.06E+05   | 2.96E+05   | 2.97E+05   | 3.00E+05   | 0.96         | <b>0.0171</b> | 0.831   |
| Q78IK4                     | MICOS complex subunit Mic27 OS=Mus musculus OX=10090 GN=Apoal PE=1 SV=1                                     | 1.61E+05   | 1.64E+05   | 1.65E+05   | 1.58E+05   | 1.57E+05   | 1.52E+05   | 0.95         | <b>0.0259</b> | 0.879   |
| F6ZD54                     | Nucleoprotein TPR OS=Mus musculus OX=10090 GN=Tpr PE=1 SV=1                                                 | 5.86E+05   | 5.98E+05   | 5.92E+05   | 5.54E+05   | 5.58E+05   | 5.79E+05   | 0.95         | <b>0.0283</b> | 0.879   |
| O35841                     | Apoptosis inhibitor 5 OS=Mus musculus OX=10090 GN=Api5 PE=1 SV=2                                            | 1.93E+05   | 1.90E+05   | 1.97E+05   | 1.85E+05   | 1.84E+05   | 1.80E+05   | 0.95         | <b>0.0154</b> | 0.806   |
| Q9D7X8                     | Gamma-glutamylcyclotransferase OS=Mus musculus OX=10090 GN=Ggct PE=1 SV=1                                   | 1.60E+05   | 1.68E+05   | 1.70E+05   | 1.56E+05   | 1.58E+05   | 1.56E+05   | 0.94         | <b>0.0427</b> | 0.922   |
| Q99K48                     | Non-POU domain-containing octamer-binding protein OS=Mus musculus OX=10090 GN=Nono PE=1 SV=3                | 3.22E+05   | 3.27E+05   | 3.31E+05   | 3.10E+05   | 2.96E+05   | 3.17E+05   | 0.94         | <b>0.0497</b> | 0.958   |
| Q3UA37                     | Glutamine-rich protein 1 OS=Mus musculus OX=10090 GN=Qrich1 PE=1 SV=1                                       | 1.96E+05   | 1.96E+05   | 2.03E+05   | 1.87E+05   | 1.89E+05   | 1.85E+05   | 0.94         | <b>0.0114</b> | 0.778   |
| Q99JX7                     | Nuclear RNA export factor 1 OS=Mus musculus OX=10090 GN=Nxf1 PE=1 SV=3                                      | 1.01E+05   | 9.97E+04   | 1.03E+05   | 9.61E+04   | 9.18E+04   | 9.80E+04   | 0.94         | <b>0.0425</b> | 0.922   |
| Q922U1                     | Proteasome subunit alpha type-5 OS=Mus musculus OX=10090 GN=Psm5 PE=1 SV=1                                  | 8.78E+04   | 8.93E+04   | 8.91E+04   | 8.16E+04   | 8.63E+04   | 8.23E+04   | 0.94         | <b>0.0251</b> | 0.879   |
| Q8R007                     | Nectin-4 OS=Mus musculus OX=10090 GN=Nectin4 PE=2 SV=1                                                      | 8.86E+04   | 8.42E+04   | 8.85E+04   | 8.19E+04   | 8.09E+04   | 8.24E+04   | 0.94         | <b>0.0230</b> | 0.879   |
| Q60902                     | Epidermal growth factor receptor substrate 15-like 1 OS=Mus musculus OX=10090 GN=Eps15l1 PE=1 SV=3          | 7.69E+04   | 7.66E+04   | 7.75E+04   | 7.07E+04   | 7.24E+04   | 7.31E+04   | 0.94         | <b>0.0032</b> | 0.483   |
| Q80UM7                     | Mannosyl-oligosaccharide glucosidase OS=Mus musculus OX=10090 GN=Mogs PE=1 SV=1                             | 6.15E+04   | 6.37E+04   | 6.16E+04   | 5.78E+04   | 5.90E+04   | 5.78E+04   | 0.93         | <b>0.0078</b> | 0.669   |
| Q9CV02                     | Ataxin-3 OS=Mus musculus OX=10090 GN=Atxn3 PE=1 SV=2                                                        | 3.58E+04   | 3.43E+04   | 3.53E+04   | 3.26E+04   | 3.22E+04   | 3.37E+04   | 0.93         | <b>0.0208</b> | 0.861   |

**Table S33. miR-183C target genes among upregulated proteins in the cornea of miR-183C KO vs WT control mice.**

| Accession | Gene Symnol | Description                                                                                                 | WT Cornea1 | WT Cornea2 | WT Cornea3 | KO Cornea1 | KO Cornea2 | KO Cornea3 | Fold Changes | pVal          | q-value |
|-----------|-------------|-------------------------------------------------------------------------------------------------------------|------------|------------|------------|------------|------------|------------|--------------|---------------|---------|
| Q60952    | Cep250      | Centrosome-associated protein CEP250 OS=Mus musculus OX=10090 GN=Cep250 PE=1 SV=4                           | 1.04E+04   | 1.01E+04   | 1.04E+04   | 1.27E+04   | 1.19E+04   | 1.26E+04   | 1.20         | <b>0.0018</b> | 0.483   |
| Q9CWS0    | Ddah1       | N(G),N(G)-dimethylarginine dimethylaminohydrolase 1 OS=Mus musculus OX=10090 GN=Ddah1 PE=1 SV=3             | 1.27E+05   | 1.13E+05   | 1.22E+05   | 1.63E+05   | 1.46E+05   | 1.55E+05   | 1.28         | <b>0.0052</b> | 0.555   |
| Q88FW7    | Lpp         | Lipoma-preferred partner homolog OS=Mus musculus OX=10090 GN=Lpp PE=1 SV=1                                  | 1.51E+05   | 1.40E+05   | 1.42E+05   | 1.66E+05   | 1.57E+05   | 1.64E+05   | 1.13         | <b>0.0114</b> | 0.778   |
| Q9DBC7    | Prkar1a     | cAMP-dependent protein kinase type I-alpha regulatory subunit OS=Mus musculus OX=10090 GN=Prkar1a PE=1 SV=3 | 2.05E+05   | 1.79E+05   | 2.21E+05   | 2.55E+05   | 2.35E+05   | 2.51E+05   | 1.22         | <b>0.0286</b> | 0.879   |
| Q9QY59    | Qk          | Protein quaking OS=Mus musculus OX=10090 GN=Qki PE=1 SV=1                                                   | 4.51E+05   | 4.45E+05   | 4.33E+05   | 4.58E+05   | 4.76E+05   | 4.68E+05   | 1.05         | <b>0.0342</b> | 0.881   |
| Q6X893    | Slc44a1     | Choline transporter-like protein 1 OS=Mus musculus OX=10090 GN=Slc44a1 PE=1 SV=3                            | 4.29E+04   | 4.19E+04   | 4.57E+04   | 4.73E+04   | 4.74E+04   | 5.06E+04   | 1.11         | <b>0.0338</b> | 0.881   |
| Q921Z5    | Tnfaip8     | Tumor necrosis factor alpha-induced protein 8 OS=Mus musculus OX=10090 GN=Tnfaip8 PE=1 SV=1                 | 4.99E+04   | 5.30E+04   | 5.10E+04   | 5.62E+04   | 5.63E+04   | 5.86E+04   | 1.11         | <b>0.0084</b> | 0.678   |
